# Supplementary material for: Global Transcriptome and Co-Expression Network Analyses Revealed Hub Genes Controlling Seed Size/Weight and/or Oil Content in Peanut
Source: Plants (Basel). 2023 Aug 31;12(17):3144. doi: 10.3390/plants12173144 (PMC10490140; doi:10.3390/plants12173144)
Supplement: Supplementary file 1 [file plants-12-03144-s001.zip]

Archive with 8 entries (8 files):
- plants-2482064 Supplementary Figures.pdf
- Table S1.xlsx
- Table S2.xlsx
- Table S3.xlsx
- Table S4.xlsx
- Table S5.xlsx
- Table S6.xlsx
- Table S7.xlsx
