# Supplementary material for: Global Transcriptome and Co-Expression Network Analyses Revealed Hub Genes Controlling Seed Size/Weight and/or Oil Content in Peanut
Source: Plants (Basel). 2023 Aug 31;12(17):3144. doi: 10.3390/plants12173144 (PMC10490140; doi:10.3390/plants12173144)
Supplement: Supplementary file 1 [file plants-12-03144-s001.zip › Table S1.xlsx]

## Sheet: Sheet1
Table S1 Summary of RNA-seq data.
Sample name	Raw reads	Clean reads	Alignment rate (%)
ZH16_S1_1	30160604	26492514	0.8678
ZH16_S1_2	20444008	18986074	0.9109
ZH16_S1_3	23793866	21821986	0.8575
ZH16_S2_1	35554214	30855880	0.9071
ZH16_S2_2	28102198	27015298	0.8628
ZH16_S2_3	46588346	42921212	0.9133
ZH16_S3_1	24713054	21320166	0.8319
ZH16_S3_2	30783852	29629572	0.9121
ZH16_S3_3	42210802	39106294	0.9498
ZH16_S4_1	50795486	47527002	0.6512
ZH16_S4_2	29890666	28941108	0.8805
ZH16_S4_3	26719440	25510920	0.8864
ZH6_S1_1	47822668	44904122	0.8579
ZH6_S1_2	19211338	17731198	0.9105
ZH6_S1_3	38671902	33229786	0.6582
ZH6_S2_1	18674258	16542092	0.8231
ZH6_S2_2	33202918	30201974	0.9533
ZH6_S2_3	47023744	42046134	0.8612
ZH6_S3_1	46495030	40393164	0.935
ZH6_S3_2	22735402	20319714	0.9707
ZH6_S3_3	61573584	57002556	0.9433
ZH6_S4_1	22934250	20812914	0.8807
ZH6_S4_2	19946704	18870758	0.9473
ZH6_S4_3	41152610	37558228	0.9033
