# Supplementary material for: Global Transcriptome and Co-Expression Network Analyses Revealed Hub Genes Controlling Seed Size/Weight and/or Oil Content in Peanut
Source: Plants (Basel). 2023 Aug 31;12(17):3144. doi: 10.3390/plants12173144 (PMC10490140; doi:10.3390/plants12173144)
Supplement: Supplementary file 1 [file plants-12-03144-s001.zip › Table S2.xlsx]

## Sheet: Sheet1
Table S2 The lists of genes expressed (FPKM > 0.1) in at least one of the eight samples.
GeneID	ZH16_S1	ZH16_S2	ZH16_S3	ZH16_S4	ZH6_S1	ZH6_S2	ZH6_S3	ZH6_S4
arahy.I0GCZ6	3.98291	51.7222	18.3102	27.5442	3.38032	31.6239	25.8282	24.3727
arahy.0MYH4H	14.9669	19.4153	5.28157	2.87845	11.0282	12.1456	4.83649	2.47144
Novel04404	0.952403	4.19967	2.46763	1.79202	0.829399	4.56547	2.46218	1.17893
arahy.3XNV5U	0.848788	0.405545	0.590707	0.424748	4.40202	0.429392	0.125696	0.045767
arahy.Q00NVG	0.980945	6.37077	1.60312	1.70754	1.10649	2.63204	1.42111	1.48628
arahy.F1M2GX	5.05977	0.529584	10.159	11.1124	4.36686	0.737231	10.9137	9.05829
arahy.FI0236	3.18419	7.02781	5.33684	4.89436	2.46662	5.07746	4.82908	4.2864
Novel04688	6.67608	2.74616	4.7281	2.94026	11.1689	4.55814	2.1604	1.92168
arahy.R16MRH	0.118631	1.04088	0.237841	0.474324	0.275924	0.93599	0.732083	0.637378
arahy.93IDVA	0	0	0.155842	0.965595	0.107824	0	0.356888	0.487306
arahy.RNM1JD	0	0.357342	0	0	0	0.372773	0.0284954	0.0518772
arahy.5C5N68	5.49544	5.17057	2.95104	2.47374	4.68584	5.14885	2.75342	2.71676
arahy.26UNPR	308.163	2.34747	18.5462	18.1369	202.915	1.36557	15.1295	18.4834
arahy.TZW06C	1.68851	11.4688	6.60064	8.65092	8.98367	8.84811	7.9719	11.1833
arahy.GP1H30	91.878	71.1743	25.6721	9.09735	68.6183	106.218	28.9183	8.54392
Novel04462	3.38416	3.68665	2.60717	2.19464	3.76394	5.70709	3.52045	2.51859
arahy.90GC30	2.15895	4.54681	2.86357	3.17766	2.18234	4.2223	3.02079	3.3929
arahy.YD7UU4	0.648856	16.2977	298.531	304.365	0.306958	47.8898	202.745	240.863
arahy.4XXE1T	18.6612	14.7	5.97715	4.84852	18.7323	12.6098	7.28546	6.71089
arahy.Q2JVR9	3.39406	4.47398	1.27349	2.4498	1.98115	2.62085	2.59364	1.7068
arahy.HF22WU	1.92653	6.37505	1.96814	0.606584	2.72701	3.5471	1.63416	0.59676
arahy.DMI4PH	8.53602	1.93958	2.10238	3.40086	18.158	4.86313	3.26985	1.75624
arahy.6AU7NA	9.20691	8.29739	5.21967	4.80687	0.923402	0.251271	0.148548	0
arahy.C5NHEB	7.4016	12.121	5.62954	4.0548	6.13279	9.88907	6.29844	5.34796
arahy.A2RU10	2.37944	6.59632	6.29972	5.77366	3.83661	9.22948	5.79539	4.01867
arahy.SE8RA9	0.72249	17.7099	3.64158	1.11721	0.939484	17.4761	4.81293	1.38847
arahy.8XLM1I	13.0926	17.1788	2.5855	1.84172	11.7365	12.5733	3.5773	2.56556
arahy.U0TDM7	23.1836	1.54163	9.43104	4.47493	41.4784	5.07909	4.74569	3.14178
arahy.GBFD5K	8.87949	13.5622	12.5884	14.0591	8.16911	19.7419	13.9964	14.0074
arahy.2990BW	0.390292	3.12203	0.849865	0.568357	0.347416	1.72086	0.734425	0.781967
arahy.WADY44	10.1181	10.66	5.22919	3.03352	7.60726	8.5554	4.65949	3.28769
arahy.26TPWE	0.406269	3.21548	2.14748	2.35715	0.200972	2.95035	1.9955	1.89471
arahy.R8GU4C	4.62581	1.23813	1.4412	1.09468	6.23339	1.02332	1.27545	0.725904
arahy.0Y5YUA	51.6599	33.387	20.3136	12.7902	37.1722	31.497	19.2299	13.4519
Novel00920	7.45548	14.219	5.88805	6.56756	5.45704	7.28993	6.30437	3.19663
arahy.C5KK4K	0	3.42621	0.458343	0.995456	0.119094	1.58832	0.865406	1.06408
Novel00665	0	2.074	0.21658	0.945295	0.160545	0.555927	0.757418	1.70417
arahy.M1WJK6	3.26684	4.54976	1.76469	1.4077	3.02798	4.96583	2.34958	1.15199
arahy.CT4LS7	26.5033	8.12999	22.8126	8.0449	18.3995	7.81107	4.11378	2.60257
arahy.R3QID6	0.0313961	17.5491	2.98873	0.59276	1.6655	11.3604	4.06533	0.196549
arahy.UG6FLW	39.6134	5.65386	2.05991	1.37171	39.0361	4.67164	2.34331	0.878961
arahy.PKYP8C	2.21728	2.17681	0.409698	0.23064	1.08966	1.14199	0.363833	0.23968
arahy.AAS7XX	3.27515	5.4731	2.94737	2.89873	3.3216	4.50395	3.55172	3.15006
arahy.B27V0W	3.38714	9.55501	6.12342	5.2775	2.05918	8.37955	5.22384	4.61991
Novel03711	1.54357	4.17314	2.98083	3.01098	1.58022	4.10809	2.54065	1.77168
arahy.QR1WVV	0.225615	0.20452	2.62075	1.88775	1.2793	0.691533	0.750262	1.68536
arahy.NYPU2B	3.38204	10.7687	9.57302	10.3096	4.62799	15.1822	9.5073	8.7637
arahy.80E1MB	5.47171	0	0.164153	0	10.5686	0	0	0
arahy.V6FSSW	0.2701	0.684314	0	0.0705973	0.241974	0.44969	0.189147	0
arahy.W5PE0L	0.140454	1.7549	0.268353	0.0534256	0.215841	3.75729	0.755909	0
arahy.J5Y3U9	5.99296	3.41811	3.69415	2.7724	5.54234	3.79073	2.97548	1.76261
arahy.20FKP1	1.50447	5.66665	2.3783	2.89136	0.612749	3.9199	2.52153	2.61401
arahy.CRBZ62	0.0466382	2.82205	0.95095	0.816561	0.12288	2.14864	0.988645	0.476457
arahy.R1695A	9.94424	11.8132	6.45368	6.30073	9.35499	10.3866	5.62803	5.63055
arahy.R5KZJD	0	13.3614	0	0	0	23.5548	3.09578	0
arahy.2FS2S8	9.3662	5.70019	4.45088	3.6636	5.99571	10.5182	6.78428	2.35303
arahy.05769Z	0	2.36003	0	0.0345082	0	1.74242	0.260561	0
Novel03589	0.448643	4.52943	2.03541	3.157	0.248625	0.507016	0.0561095	0.0621208
arahy.P1JE42	0.68537	4.35118	2.31566	3.73379	0.703002	3.33467	2.35021	3.33248
arahy.JLT7JT	17.1398	42.9663	17.7105	22.2438	26.3831	43.7726	18.1487	16.7954
arahy.4N43IV	0	1.47236	0	0.391707	0	2.94056	0.752201	0
Novel02910	2.67715	0.254443	0.255558	0.0347497	22.6843	0.818728	5.31519	0.0924592
arahy.C03EZ9	0.768878	25.5318	5.67745	4.03985	1.11481	21.4922	7.94568	4.5369
arahy.10NZ15	9.80056	37.1446	24.1509	17.0673	11.1225	34.9105	41.63	20.4862
arahy.2AHU2Q	1.7385	2.48189	1.25731	0.564603	2.20434	1.73214	1.22982	0.743713
arahy.SFD8TD	2.91959	19.2087	9.60279	7.24252	5.43627	15.2864	9.21133	6.66617
arahy.T2VPZC	0.432269	467.653	1.2685	0.0937647	0.673351	133.712	17.3917	0.367576
arahy.MDF8X4	0	2.16067	0	0	0	1.21283	0.224213	0
arahy.W7ULQG	0.459533	0.0248138	0	0	2.20437	0.138685	0.108075	0
Novel00098	11.818	3.48099	0.670963	0.616331	15.6586	2.92195	0.595673	0.33876
arahy.3P39BB	0.743813	1.03868	1.52289	2.90929	0.305168	0.898084	1.81066	2.63501
arahy.H50K6P	3.60215	13.4555	4.51933	1.92405	3.87578	15.0275	3.83108	1.06059
arahy.R179J2	0.723939	2.46515	1.32547	1.22693	0.408035	1.77147	1.38002	1.64079
arahy.TY2TJN	0.0280185	5.67395	0	0	0	3.87046	0.337805	0
arahy.5W32PJ	13.4374	9.20193	15.9246	12.2973	7.76423	12.5618	13.743	13.7959
arahy.DE35CE	14.9042	0	0.111899	0	28.5632	0	0	0
arahy.F7JNQF	20.6839	12.8616	27.03	9.52641	81.1806	37.3962	64.1708	27.0971
arahy.GEM3QE	24.851	6.13926	3.10657	3.25137	21.4166	5.44903	2.76334	2.2963
arahy.FRP7IX	0.0212542	0.144927	0.0471278	0.0860685	0.204798	0.0538719	0.134598	0.0319631
arahy.Q49AMZ	0.325543	0	0.049143	0	0.118082	0.0357687	0	0
arahy.MPJ1GQ	0.853535	0.776164	0.177238	0.0510843	0.320274	0.644166	0.419209	0.31581
arahy.U2K3RD	9.75028	8.63839	19.7439	10.3601	8.77197	11.5911	14.4284	9.34553
arahy.QR40AE	0	1.05709	0.110542	0.450104	0.150604	0.522299	0.246886	0.296392
arahy.SBJ000	2.08478	3.67159	4.25148	3.59964	4.67811	6.93159	4.8159	3.75544
arahy.FSP2M7	6.31315	9.71008	5.557	4.03067	12.6249	12.3166	4.22143	3.37375
arahy.C51T4A	1.35645	4.91029	0.16948	0.037922	0.688559	2.84422	0.115664	0
arahy.DF92AY	0.491377	1.25475	0.358037	0.745353	0.601046	1.26362	0.884013	0.544416
arahy.W0C6E5	0	0	0	0	0	0	0.285827	0.260181
arahy.LFL6K6	496.136	18.6365	13.139	15.4352	932.734	16.4479	9.0236	9.83236
arahy.45BME0	15.8157	3.31294	2.34628	2.25339	17.9827	3.78442	2.28841	1.96004
arahy.FNNX8Q	0.153516	0.969908	0.0777773	0.0526775	0.117387	1.28992	0.192461	0.02336
arahy.CT6H1M	3.01575	3.11682	3.22231	2.73122	1.5794	5.54527	5.60076	2.52904
arahy.ZZ1TXK	4.83288	0.626035	2.67561	1.7173	5.37026	5.20535	0.913393	0.921398
arahy.4L58E6	0	0	0	0	0.484934	0.970568	0.43296	0.267167
arahy.V3MY1S	0.443023	1.23915	2.66264	1.69182	0.642841	2.21547	2.25449	1.5014
arahy.57G84F	2.4629	14.1088	6.25068	6.50124	3.31313	14.5631	12.1033	10.8244
arahy.JNZC9G	0	0.151508	0	0.0723108	0	0.0810694	0.105682	0.271706
arahy.N1DX8X	0	0.186336	0.0158668	0	0.601954	0.109489	0.0346848	0.0315726
arahy.UK934I	0	2.04383	0.075021	0.0241472	0.0700827	0.72847	0.116159	0
arahy.PR6200	4.91235	1.30541	1.0751	1.64937	4.52981	2.17095	2.16213	1.20185
arahy.F5AS58	1.3243	1.15739	0.552642	0.864825	0.942907	1.08513	1.23892	0.883337
arahy.S15XUX	8.71336	13.4628	5.07568	4.0825	4.52018	13.9381	6.78786	3.74499
arahy.RGBH4Y	5.5474	0.293769	0.611244	0.571388	6.95475	0.627084	0.546577	0.582094
arahy.U4ADFF	1.76373	0.0784028	0.368195	0.208453	0.611942	0.062759	0.0257842	0.04282
arahy.V34G3Y	25.7148	10.0656	4.74228	4.18622	22.1852	7.74835	6.21421	3.67823
arahy.97NMUU	1.53435	7.9277	2.7796	1.48644	1.78695	8.78731	2.83407	1.65442
arahy.LCU3UP	6.51623	18.6263	1.39261	0.916273	5.08132	17.7216	2.20406	0.354152
arahy.8AZ6HD	5.96423	10.748	0.956098	0.384672	0.48834	1.63387	0.846318	0.50902
arahy.TVM56H	0.0421234	0.287229	100.794	104.375	0.088498	0.445749	114.009	152.248
arahy.28RV6S	5.11954	2.51444	1.9256	1.68345	6.3172	2.9094	2.15579	2.01907
arahy.P9L48X	3.75757	6.14945	2.38798	2.54966	3.8413	6.35546	2.64692	1.89371
arahy.BPI4KG	2.26558	7.34145	11.5776	9.29585	3.63374	10.5751	14.7555	8.69428
arahy.1Z9DBD	1.35119	12.0466	3.59931	5.18717	1.22706	9.84742	4.55283	3.66446
arahy.YX753W	81.8382	125.145	61.4523	61.8717	30.8143	35.2023	21.335	19.6478
arahy.P9U8RJ	5.02631	10.4881	6.42737	5.99019	4.24885	9.42296	5.72629	5.64161
arahy.USU7SK	3.41018	4.84898	1.47471	1.44145	3.353	2.27011	1.47127	1.12779
arahy.I5HDSE	2.65264	1.0449	0.514378	0.269656	1.58567	1.74166	0.506271	0.0685085
arahy.XFB661	3.41719	3.31739	2.68809	3.8789	4.55652	3.97905	3.82777	4.71118
arahy.X3I9NV	0.684998	1.07598	0.704333	0.0734884	1.11797	1.47508	0.957853	0.525658
arahy.SG9L4X	10.5077	11.7747	7.6948	5.34428	10.6838	12.1732	7.73393	6.1322
Novel04561	0.0482695	0.243473	1.48622	0.547794	0.164466	0.0553115	0.183209	0.391366
arahy.VV2U9Y	0.0761712	0.991285	0.483613	1.08633	0	0.414771	0.545296	0.343649
Novel04405	1.63653	6.22827	6.28707	6.20285	1.99842	10.3909	6.50901	3.71771
arahy.0CMJ96	0.599122	1.07922	1.3016	1.20554	0.685833	0.774331	1.08924	1.68001
arahy.T3YMAA	0	0.0213079	0.0378311	0	0.190935	0.0748013	0	0
arahy.ZQXN8Z	1.72105	0.907958	0.718518	1.31557	0.953187	0.727149	0.670975	1.70611
arahy.4YMK55	1.51405	2.60352	0.923997	1.40249	1.89788	2.8842	1.05164	0.828443
arahy.50D6TG	14.8282	4.52993	3.55422	3.2212	29.3503	6.11569	3.44515	2.3431
arahy.B845YX	60.6295	12.3366	8.01411	9.56439	61.2714	11.7288	6.66681	6.7431
arahy.GR7IKK	0.218973	1.99563	0.5365	0.393484	0.858545	1.19807	0.471877	0.958534
Novel01018	3.45094	3.65673	0.662	2.24944	0.166609	0.128728	0	0
arahy.8HPN5U	1.81758	0.113228	4.73229	0.560818	2.48	0.866784	0.105682	0.351013
arahy.3R4C35	4.17747	11.0423	9.48325	4.17711	4.08937	9.28814	9.54525	4.82636
arahy.IZH4BU	0.0758313	0.290318	0.125206	0.294971	0	0.0254243	0.134718	0.178982
arahy.JMV1FI	1.59609	3.40438	2.72846	1.26279	1.43098	3.68566	1.94718	1.32981
arahy.Y01GTZ	2.49177	8.36475	3.25943	3.96354	2.207	7.72332	3.56955	3.46528
arahy.U142NQ	4.22785	20.7303	4.94029	4.25235	4.14483	12.5311	6.37464	6.8113
arahy.XUAL01	1.23077	0.427696	0.596114	0.0968005	10.0807	0.814648	1.12875	0.170086
arahy.HJVE3I	1.52238	3.89755	9.05604	9.70481	1.21894	8.01851	4.42917	3.11978
arahy.Y4RH6T	1.63541	0.862154	0.646826	0.673686	1.78889	1.10366	0.51323	0.164945
arahy.K5R6XZ	0	0	0	0	0	0.115974	0	0
arahy.5MV2CV	2.09811	4.79516	1.6189	1.33213	1.86061	4.12589	2.23158	1.42528
arahy.C1WSFF	0.0277813	0.543015	0.189237	0.0628082	0.22156	0.415973	0.130036	0
arahy.69Q1HU	0.816388	7.32934	6.62439	6.01367	1.71326	7.72835	6.07122	7.75898
arahy.DJ079B	0.013204	1.72759	0.418191	0.492474	0.081139	1.36975	0.53443	0.330592
arahy.11374W	0	0.484873	0	0	0	0.0575872	0.20017	0
arahy.0BD95F	1.83865	0.456364	0.266724	0.259046	2.52684	0.276116	0.09109	0.0829167
arahy.P00G4Y	0.832951	0.0775739	0.0371298	0	3.3544	0.121312	0.0135277	0
arahy.21Q806	39.7266	30.2047	28.8106	16.8489	38.7966	45.1894	37.7842	21.641
arahy.7DV1VQ	28.4303	20.1096	11.1666	6.23722	23.1233	24.0081	12.4762	7.50738
arahy.KKZ0LN	0.264594	2.03809	0.401451	0.0695511	0.522037	1.19999	0.907068	0.129563
arahy.L7HRZC	0	0.234348	0.469848	0.255738	0.0211523	0.319732	0.313467	0.51298
arahy.59WZJD	3.35348	10.2845	5.65098	6.3506	3.69606	12.5832	6.22532	7.70985
arahy.3BDP96	1.42846	0.106487	2.95001	3.66297	4.41354	0.056584	4.64312	4.11932
arahy.0C39AK	0.232702	0.513757	0.225054	0.267985	0.388653	0.459778	0.151811	0.158553
arahy.MR686J	0.0438419	0	0	0	1.31358	0	0	0
arahy.DSMN0K	15.1006	13.6031	10.8568	8.72155	15.0626	13.7953	11.6268	9.48651
arahy.P37ZHI	0.0730469	0.081791	0.0833392	0.2162	0	0.268077	1.04747	0.165833
Novel01515	1.31172	0.278576	0.225971	0.170403	0.65729	0.183646	0.259405	0.0566742
arahy.QBZ9GT	3.88475	6.09554	4.90208	2.83578	2.98592	7.20208	5.539	3.14946
arahy.JW7TU4	0.173846	0.114973	0.253887	0.216528	0.346478	0.81903	0.328918	0.152443
arahy.W39MEW	20.2945	25.8553	11.8913	6.60649	19.1872	22.031	14.2951	9.44193
arahy.I7QGG2	4.17094	6.68481	11.4143	7.19401	4.67954	5.67664	11.0562	6.84925
arahy.A2ZXSG	0	44.7349	0	0.161212	0.0174001	62.0566	8.6936	0
arahy.JFA2W2	0.445139	1.9417	0.841077	0.94974	0.229959	1.59219	0.768444	1.075
arahy.MYJ1G5	10.5417	15.0201	6.22174	3.67721	10.4559	14.0888	6.54003	3.33376
arahy.C8ILII	5.9486	2.792	2.16925	1.33674	6.50758	2.51402	2.15008	1.14436
arahy.W1Y39Q	4.59336	5.61808	5.82345	3.36402	4.68592	7.58103	4.27235	3.12215
Novel00107	0.147026	0.663763	0.0420212	0.0419016	0.234898	0.340805	0.0918586	0.0278721
arahy.1T2QZ7	5.40395	7.21975	2.89973	2.29839	4.42142	5.24021	2.54602	1.86447
arahy.HWX0BC	0.0221349	0.104851	2.40556	3.93973	0.0135031	0.228151	1.08483	2.69905
arahy.M58F5L	0	0	0	0	0.184493	0.0444157	0	0
arahy.JNH43Q	0	0.72708	1.79924	1.73453	0.0185384	1.52312	1.36565	1.46503
arahy.54WUVN	2.35261	4.60286	2.34765	2.61558	1.31496	4.32329	2.64086	2.57449
arahy.67FQQF	2.73044	9.49947	9.17295	8.90082	1.24539	6.68588	6.02555	6.82897
arahy.NS4EV3	2.46654	36.6185	20.3338	11.7555	4.61915	33.469	20.0329	15.6548
arahy.KM1FBW	0	0	0	0	0.12398	0	0	0
arahy.M4SWJY	6.38732	3.96067	2.68073	2.32143	4.99666	4.68433	2.50744	1.98295
arahy.L0FSAX	0.084099	0.0804755	0.0486826	0.185874	0.203848	0.0679935	0.0669246	0.111837
arahy.J7EB43	2.84201	11.7364	4.29314	3.27259	2.95215	8.65448	4.925	3.35707
arahy.MQG1NS	35.1871	68.6027	57.9315	51.1989	25.4067	67.9546	45.676	40.4829
arahy.SANC69	0.134812	7.24451	4.45352	2.67496	0.569501	8.01697	4.39049	3.52285
arahy.Q6YSSX	0.25412	0	0	0	0.332027	0	0	0
arahy.W5UC8T	16.5845	22.8422	7.39223	2.94415	13.8008	21.3189	8.61888	2.6995
arahy.SMM6ZV	1.99398	0.470842	1.09814	0.634676	2.10024	0.645942	0.582728	0.285701
arahy.YHI9TY	0.501572	9.5915	9.9534	6.30573	0.812061	8.38632	8.59374	6.09707
arahy.011XRQ	6.60203	36.0111	12.06	8.03187	6.95354	21.5302	12.9637	7.40494
arahy.324ZN3	2.7292	3.85935	1.76677	1.98889	2.34696	2.7454	1.90371	1.56897
arahy.HVHQ42	2.93019	0	0	0	3.30104	0	0	0
arahy.U80PFY	0.199922	7.44626	9.72888	2.01644	0.978401	10.0027	10.1003	3.20782
arahy.D8U9UB	0.465919	0.427084	0.529381	0.350104	0.277871	0.51585	0.382338	0.213087
arahy.J7B9GC	0.284409	0	0	0	0	0	0	0
arahy.HV5BK9	2.6037	1.48307	1.595	1.43583	3.24141	1.39582	1.46192	1.00857
arahy.S4ITMM	0.73332	2.5782	2.00268	1.35885	0.558521	2.26601	1.32844	1.13671
arahy.KP6TGQ	3.73566	17.1995	8.43794	9.29778	5.40337	18.7675	11.7071	10.1152
arahy.HH45UC	2.7254	3.59307	4.76578	2.74884	1.86285	4.24993	4.19191	2.81326
arahy.CRLU4M	0.392033	5.472	1.23527	0.265747	0.920786	5.27656	1.50105	0.114315
arahy.FGJH0E	0.175809	3.28831	6.1357	1.24205	0.180403	2.193	9.81426	2.15311
arahy.8KGB21	11.2811	0.690756	0.588016	2.16456	14.8826	0.587559	1.26864	0.546213
arahy.P9J5FJ	27.4375	171.064	170.204	76.5957	32.5028	134.233	118.386	64.7629
arahy.I6S6H6	0.0304511	0	0	0	0.397491	0	0.0407942	0
arahy.WI67VP	469.848	157.633	166.564	157.723	544.884	173.423	200.299	118.116
Novel01622	33.8592	17.983	21.0176	14.7209	40.2484	32.1324	18.7122	11.6961
arahy.LN2D8T	0	0	0.14809	0	0	0.0931243	0	0
arahy.G9AJXB	0.887265	0.593349	1.23458	0.863637	0.678358	0.470239	1.30874	0.678238
arahy.U952AB	0.38636	1.16168	1.58299	1.46329	0.19281	0.911886	1.64755	1.42341
arahy.67VJX2	2.55301	6.15165	3.71442	2.54041	3.64136	6.49744	4.84759	4.12337
arahy.A8F835	0.113642	0	0.102165	0.120447	0.24255	0.143656	0.0761206	0.668571
arahy.STS3CH	1.75589	2.11718	1.50341	1.65361	1.64765	2.33996	2.11157	0.975242
arahy.31PXUJ	0.386841	0	0	0	0.448241	0	0	0
arahy.HLS3VZ	54.3594	7.27917	1.66847	1.96347	54.3145	5.81482	2.41633	1.68695
arahy.EFWL5I	7.24844	8.62293	4.83455	3.94181	7.10947	8.84584	5.04677	4.40489
arahy.ZSL9VF	0.113164	0.0150613	0	0	0.0282584	0	0	0
arahy.6S4II0	0.137094	1.4835	0.268157	0	6.14044	0.957584	0.157456	0
arahy.9NB33V	0.299813	0.142651	0.0191766	0.0573659	1.22999	0.130769	0	0
arahy.T1WRD7	0	0	0.10125	0.219904	0.606014	0.0175981	0.105678	0.0679055
arahy.B2LHN7	1.16028	5.65833	6.39159	6.05265	1.67072	4.10658	4.80547	4.595
arahy.T9XRV5	0.0996235	0.142297	0.574855	0.291919	0.0576887	0.079061	0.468697	0.260477
arahy.Q4QPDX	29.6523	11.8325	4.6832	3.22055	17.0937	8.14209	5.37847	2.82639
arahy.K0ICXJ	0	0.463492	0.132804	0.080519	0.0748247	0.332346	0	0
arahy.H67HNM	7.4221	7.43905	3.97717	2.9618	7.49756	8.94629	4.1711	3.69151
arahy.8897EQ	7.63072	8.86384	5.27168	4.36304	5.75286	8.50894	5.41711	3.99624
Novel00364	16.6934	14.0558	7.63643	6.72662	18.2876	11.5772	7.97537	7.12684
Novel02520	0	7.04612	1.46074	1.54221	2.28326	9.06422	2.61787	0.388716
arahy.78X8E3	15.1438	9.74785	5.38169	2.97945	9.45388	10.2531	5.55977	4.65481
arahy.YXY0UL	0.0162654	0.0108657	0.120743	0.0119461	0.0224689	0	0	0
arahy.PJC979	0.137497	0.15595	0.584802	0.479754	0.103198	0.290372	0.496413	1.00293
arahy.3PZ9PI	0.113069	1.62907	1.0845	1.48075	0.190596	1.72004	1.16133	2.48746
Novel03356	1.59518	97.4755	15.4129	13.2255	1.06713	47.898	17.7713	9.327
arahy.YQ4454	0.0284273	0.807132	0.791984	0.40952	0.19318	0.932451	0.163702	0.268026
arahy.F67ZD9	0.0139397	0	0	0	0.819034	0	0.0230294	0
arahy.Z8ERH5	8.83444	14.3285	11.0597	6.13182	9.70191	15.4484	5.67396	3.66664
arahy.CY0NM8	0.167514	4.15758	0.512906	0.324371	0.158126	2.60942	0.894668	0.471909
arahy.71J8LW	4.77307	2.22221	1.5884	1.11435	3.36773	2.31604	1.39139	1.48082
arahy.KEJN3W	1.41802	3.18192	1.3853	0.579789	1.28743	2.45055	0.948585	0.495769
arahy.C3WWRZ	2.11769	18.0388	4.29215	6.74655	0.977013	13.296	7.68746	6.01334
arahy.F2QG3S	0.225316	4.52811	2.37359	1.39153	0.555542	4.31072	2.39162	1.77918
arahy.LHV83Q	1.18383	9.82438	6.99828	6.37671	0.805497	4.90054	2.33607	4.20046
arahy.BC5R4P	0.0935613	0.557712	0.514486	0.1949	0.217241	0.751018	0.357459	0.167871
arahy.UHQ127	0.917948	1.42067	2.06179	2.77193	0.483939	1.21453	3.7952	2.54697
arahy.1FZS4Y	1.05077	1.62809	0.766359	0.350863	7.11287	5.41415	2.11268	1.7119
arahy.RJAX1V	1.4941	5.22902	2.20897	2.62179	1.14646	3.82936	2.9859	2.28995
arahy.UQN5NZ	0.107386	0	0	0	0.0197031	0	0	0
arahy.D3WR7Y	0.638881	4.61525	1.46117	1.3024	0.971542	1.97272	0.598102	0.98149
arahy.NC5V37	0.0692995	0.066547	0.0212346	0.100789	0.272951	0	0.046419	0
arahy.0WAD2K	0.0941258	0.722754	0.071136	0	0.0574205	1.36344	0.803398	0.141551
arahy.DN45ZN	0.0782376	2.59328	0.649828	0.602301	0.474239	2.42669	0.907745	1.27006
arahy.HLUA2X	21.6534	9.10871	5.05556	3.82345	18.5536	12.2643	6.6788	4.59467
arahy.WRTU1C	3.60401	7.27569	4.00036	5.45568	3.06187	6.50442	5.00814	4.35679
arahy.T6QNA0	8.04663	8.17918	10.7621	7.94033	7.30831	14.9049	10.8125	5.65816
arahy.7VJC80	1.30302	2.74299	1.24862	0.922079	0.639924	2.06088	0.726268	0.733696
arahy.X4I5LU	9.09083	6.0024	3.81193	3.08409	8.82634	4.6595	3.27077	2.48972
arahy.M3C1JT	0.678536	2.68901	1.20767	1.31552	0.653384	2.10696	1.04962	1.02652
arahy.X563NF	0.988554	0.457077	0	0	1.27783	0.0751999	0	0
Novel01657	1.45428	2.20465	1.39361	0.525512	1.39975	1.72924	0.517483	0.177808
arahy.T191C4	0.829984	2.27443	1.73226	1.23133	1.08653	5.25058	3.37332	2.20283
arahy.5G8A8Q	0.742381	0.711934	1.31616	0.841088	0.906619	1.39158	1.98704	1.51828
arahy.MZM9C8	4.28912	1.33755	11.1204	10.7993	5.15768	2.19021	8.53804	9.39118
arahy.HS1Y4C	1.09062	13.9819	1.64557	0.542875	0.66108	10.268	2.23054	0.558597
arahy.MD3X4L	0.645545	5.4643	1.37197	0.680941	2.57	2.39999	1.07203	0.750647
arahy.DG0J8D	1.95733	6.29504	2.43521	3.41803	1.33223	5.29531	3.36065	2.25252
arahy.SHPC4Z	15.3174	6.16015	4.69212	5.0436	13.2635	5.21802	3.66228	4.43404
arahy.IY78PD	1.56893	0	0	0.0412632	0.844892	0.0515832	0.030153	0
arahy.IMCF17	0.231947	0.0436798	0.373486	0.0557903	0.194014	0.484092	0.0815374	0.0742213
arahy.M6G4Q4	0.221493	0.178346	0.276132	0.0732695	0.558463	0.279352	0.362812	0.206596
arahy.G0WLQA	2.85184	7.62347	6.0467	4.26191	3.19632	12.498	6.56666	4.35141
arahy.D4VV12	4.51717	5.45488	2.87608	1.89894	3.98707	4.84787	2.96341	2.25985
arahy.MZCS2R	97.1613	11.4138	17.8162	17.3346	78.444	11.4479	20.7026	20.1866
arahy.ZG7XLL	3.41758	5.87395	3.30988	2.75886	3.70947	6.263	4.38629	3.31695
arahy.3DFG0M	1.07707	3.35812	13.692	15.2649	1.46292	3.02689	11.5366	14.8735
Novel03354	0.155452	11.3757	2.88006	6.94524	0.287368	9.5271	3.1801	2.53255
arahy.P5QPHI	1.82535	9.3709	1.07583	0.995259	1.24853	4.43194	2.33999	1.1954
arahy.VNR2QD	7.78712	30.5465	0.829489	0	10.6058	14.0462	9.4264	0
arahy.HNDE73	2.0605	7.59736	4.76156	3.43487	2.16847	6.39588	4.46645	5.20174
arahy.SK03LI	26.3837	12.5025	8.59906	6.37979	26.2712	11.7235	6.59004	7.02665
arahy.V5MTHL	0.100326	0.198958	0.217846	0.0614239	0.372451	0.374122	0.289053	0.0493372
arahy.WXJ2TL	0	0.0940199	0.02184	0.140877	0	0.0591485	0.0716135	0
arahy.ZCFB2D	6.53741	5.99732	4.01707	2.90785	7.63988	6.38136	5.03886	3.22744
arahy.38HXNI	0	0.29997	0	0	0	0	0	0
arahy.D0V14N	6.6527	0.501383	0.460345	0.389361	5.15658	0.62497	0.512186	0.458411
arahy.EK09V6	17.8818	20.1662	9.50084	5.31569	12.6011	17.9275	9.92164	6.03516
arahy.J580FK	66.2407	23.7352	14.2947	13.3123	56.6091	20.4609	12.834	12.6263
arahy.US8I5D	12.3507	8.65013	8.51789	7.66595	11.0325	10.0959	6.53548	8.37121
arahy.5SY970	2.08576	6.15486	2.31309	2.32854	1.69237	4.75139	3.95448	1.49161
Novel04450	0.585518	3.25335	1.30304	2.3792	0.584641	1.74029	1.19608	2.00583
Novel04293	0.0769871	0.763428	6.15177	9.95084	0.286545	0.619117	7.48275	8.79057
arahy.TWX3XF	15.0945	25.1874	16.3358	13.9789	12.0028	21.841	18.4853	14.8725
arahy.ZXP0UV	11.6768	46.6115	29.5074	13.6517	13.374	38.3935	26.9386	15.4357
arahy.YEM7S9	18.6271	5.66868	1.86777	0.614787	15.3352	9.79289	1.62376	0
arahy.GJ31ZB	0.0990154	0.625969	1.79094	0.950329	0.395894	0.92428	2.68188	0.500387
arahy.N15UBW	0.87051	1.85392	1.75106	0.72941	0.787645	2.37853	1.35381	1.01527
arahy.1JVL6D	15.9458	33.6423	16.8104	13.6863	18.8906	32.0049	23.9693	16.0829
arahy.0DZ072	0.140059	0.0117133	0	0	0.180302	0.0103161	0	0
arahy.9E5ZPN	0	0.143098	0.0610984	0.0913866	0	0.0512279	0.0667807	0
Novel00764	1.42085	4.17099	4.45254	3.2032	1.73098	5.70719	3.71028	2.31739
Novel04564	19.5808	18.8759	6.37365	5.31146	24.5284	18.7841	6.20803	4.84365
arahy.Z0SJI2	0.842324	9.86176	6.55813	6.3065	1.08741	13.3361	6.55	5.4495
arahy.G7PZ6B	0	0.944875	0	0	0	0.28311	0.0306627	0
arahy.83XS31	1.32136	2.43236	3.35522	2.26065	1.22653	4.77962	2.83145	1.7507
arahy.R5QH0H	0.55872	0.11247	0.222431	0	1.82553	0.283228	0.124207	0.0651429
arahy.GE0XP5	33.3219	32.1064	47.2242	47.9189	32.3989	56.1947	45.7834	39.4398
arahy.GYZC8Z	0.0807358	4.22209	1.68382	0.900694	0.297049	2.48258	1.36016	1.03352
arahy.0KG03L	6.42542	15.6268	9.83614	6.61974	5.53553	11.9098	9.14626	7.29242
Novel00822	0.234011	2.69818	2.04138	1.29005	0.0664443	5.02384	1.18426	0.190244
arahy.VI8BIT	0	3.04773	0.606121	0.163483	0.881325	2.78965	0.472728	0
arahy.U34X7W	0.0550577	0.87526	0.295609	0.251772	0.243978	0.201846	0.0984298	0.3392
arahy.HA647U	0	0.177234	0.729847	1.05037	0	0.0799057	0.468743	0.474093
arahy.HAA1ER	2.65685	5.66691	6.31241	12.5263	1.87434	3.74395	7.83241	9.77276
arahy.NRE7W4	0	0	0	0	0.169308	0	0.0515889	0.265267
arahy.I66GUF	8.70162	0.465885	2.74918	2.98224	16.1693	18.4203	1.14753	1.01557
arahy.WE6MWD	9.45633	1.49057	0.918889	1.07558	18.8767	1.50507	1.32438	1.3655
arahy.Z25GSD	0	0.562074	1.35047	1.24473	0.856433	0.0572581	0.69662	0.327791
arahy.4MV0VI	0.737263	4.96704	7.43836	4.7714	1.17087	7.75023	6.79907	5.09882
arahy.R04FVA	0.952599	1.45462	0.7215	0.333954	1.24823	1.80302	0.393443	0.674354
arahy.E4NLGE	1.03863	1.61478	0.979412	0.952049	0.976991	1.59645	1.49769	1.09457
arahy.ZFP9XM	0.627961	6.31837	3.0697	1.93205	1.06996	4.71697	3.11152	2.02837
arahy.EKL24D	0.387584	2.19819	1.26659	1.12879	0.328302	1.83749	1.09173	1.41816
arahy.V1RZF6	9.78613	6.86399	1.94352	2.12509	3.90404	2.44233	2.11257	1.65296
arahy.V8868B	6.80834	4.78812	2.82639	2.02503	8.77403	5.92966	3.35081	3.43059
arahy.8ZHK7B	32.6289	12.381	3.19114	3.53374	24.8914	7.00382	4.40537	3.59074
arahy.Q3ZPYL	1.76392	1.87175	1.36352	1.98287	3.0406	1.84183	1.39809	1.12084
arahy.JWH7Q7	67.9555	65.9124	31.8501	23.9941	47.7372	48.7307	33.351	28.1214
Novel04436	0.0656154	0.094179	8.36041	6.59824	0.0324584	0.0674305	7.54479	5.14478
arahy.5RVD89	0.141074	0.594239	1.77775	1.51098	0.600023	1.12213	2.39712	1.62354
arahy.URL2CG	8.96788	3.6393	3.94696	2.74458	8.37282	5.72399	3.7667	2.36721
arahy.L505QV	6.50918	9.02495	7.67874	4.64708	8.08579	9.73141	6.05745	4.66916
arahy.U8KCPE	10.1277	12.3678	6.42033	6.10211	8.37952	8.75013	4.85541	5.27728
arahy.IU7X6X	2.45665	3.91348	5.2241	4.60627	2.96114	5.29546	6.25962	5.8593
arahy.S7XF8N	155.57	76.6305	52.72	39.6179	190.552	104.778	49.2145	44.7655
arahy.HP7MKL	1.70438	5.23166	2.1053	2.28002	1.67838	5.95159	3.32168	1.96461
arahy.612ZK0	3.28474	7.53297	3.92405	2.96956	3.17595	7.54624	3.93923	2.87819
arahy.WLZ7Z3	16.5836	6.92566	1.39713	1.08377	18.0403	7.54721	1.31926	0.551091
arahy.HXN3Y4	34.0756	55.3766	27.1783	19.7217	37.045	43.0371	25.8912	20.0976
arahy.C5B8HT	7.59973	7.30222	4.66678	3.90504	7.85683	7.13355	5.20576	3.49034
arahy.4Z5CAK	7.3133	9.16929	11.3937	8.30496	5.92665	10.5467	12.7991	11.3251
arahy.2KYZ1C	0	0.139868	0.337694	0.0608816	0.00758861	0.0745694	0.2192	0.12438
arahy.C3YMZR	0	1.56569	0.0816235	0.390705	0.0801216	0.654031	0.229019	0.240228
arahy.ZZ9Q5Y	11.6605	6.73576	4.92028	5.93995	12.6396	11.9476	7.37499	6.45069
arahy.KE6FEG	2.8735	3.92058	3.00203	4.29763	2.47464	3.89305	4.10937	4.28249
arahy.AAFE4G	3.12136	13.0461	2.47054	0.993035	4.02074	9.61943	3.66088	1.20176
arahy.CRQ4KQ	8.27604	16.7986	11.7088	7.93508	8.00041	16.7077	11.3361	7.98417
arahy.5HMM9E	4.96373	18.931	11.9858	7.11099	4.14645	22.6369	10.198	5.95001
arahy.7NL1KT	0	0	0.208455	0.469865	0.607184	0.0197092	0.231218	0.481672
Novel01433	26.5468	97.8327	42.0097	25.649	26.9278	118.391	96.3496	31.6913
arahy.I2W0TQ	0	0.0253533	0	0	0.105494	0	0.0473272	0
Novel00356	1.42987	3.28071	1.66566	0.954464	1.11769	3.70073	1.82258	1.52851
arahy.B36403	7.92133	5.36933	4.80166	3.87669	3.7874	4.62586	3.2202	2.20796
arahy.UDT0Z0	0.485352	1.83445	0.185763	0.0644822	1.12597	1.16259	0.529744	0.114966
arahy.P862LP	0.217988	0.548767	0.22715	0	0.221632	0.137937	0	0
arahy.1B13BQ	0.0576561	0.364148	0.147545	0	0.0117242	0	0	0
arahy.TIU0MY	11.5924	4.68826	3.77111	3.91386	12.7634	5.27028	3.35464	2.96515
arahy.55IBJZ	0	0.201078	0.0572358	0	0	0.0479893	0	0
arahy.H7LQV6	0.34179	0.819315	0.284888	0.371474	0.238308	1.02535	0.624327	0.280945
arahy.VB18ZC	3.54245	6.88312	3.39255	2.49077	3.8852	6.23081	4.37138	2.18133
arahy.Q498P0	3.75742	24.3811	7.63079	3.52518	3.59822	16.4074	9.78714	2.68359
arahy.A82XLX	24.4766	26.6418	11.0591	8.27903	19.4006	30.3	11.3575	5.12739
arahy.HQA39L	0.564591	0.507486	0.0277037	0.00723187	0.144191	0.266527	0.0624582	0.0235009
arahy.8U8ZZM	8.67577	8.95773	20.1718	17.1575	15.0739	26.092	14.5471	12.0445
arahy.91ADXD	6.52553	0.256641	2.56481	1.02121	0.549222	0.309233	1.01808	0.205951
arahy.NSDD0K	0.472113	3.91527	1.12169	0.444972	0.519908	3.02532	0.922989	0.611917
Novel04629	3.70812	11.7164	5.47616	7.23653	4.18881	10.7098	6.83345	4.27936
arahy.B68HGA	2.86505	11.1831	14.8	9.29081	5.07232	11.997	11.5394	7.42492
arahy.PM4HSD	0	0	0	0	0.0387747	0.114681	0	0
arahy.7F0WTK	2.80559	9.41938	9.47738	7.58953	2.66365	11.5054	11.0821	8.58271
arahy.GC2KXI	0	0.2833	0	0	0	0.576222	0.264419	0
Novel04005	3.96878	7.9289	8.83569	5.59126	0.545089	1.33723	0.422148	0
arahy.GBW8AP	1.64799	0.126872	0.0841716	0.191122	0.584544	0.124674	0	0.440906
arahy.LX0PL1	3.74038	2.34189	4.1826	1.51004	11.0184	2.68765	6.7001	1.59463
arahy.JJ9I6U	18.2461	13.5145	10.0784	9.60076	15.143	11.6295	8.61589	7.51217
arahy.8I4SMW	0.515247	1.57493	0.792905	0.667857	0.478676	0.966122	0.607537	0.494556
arahy.YMN08X	255.807	89.6354	125.956	51.2076	209.483	126.895	96.5573	43.6729
arahy.T21N8D	6.21236	4.74661	7.74057	4.42303	11.1176	10.7118	7.38577	4.05032
arahy.ZRN1TD	0.0310793	0	0.847422	0.585273	0.225388	0	0.889946	0.824877
arahy.FGM9QK	0.89874	8.70711	2.64151	2.53063	1.38858	7.1924	3.09742	3.14648
Novel03838	0.233953	1.9014	2.45996	2.67243	0.256138	1.94344	2.23355	1.7548
Novel03133	0	0	0.0405823	0.0413778	0	0.123998	0	0
arahy.CW6LLE	3.80891	5.04532	4.18371	2.60543	4.59462	4.13506	2.22672	1.95694
Novel01566	0.0577308	0.588139	0.894423	0	0.281912	1.17716	4.23905	6.52115
arahy.N5266S	3.60271	9.02056	2.29698	4.00556	3.24742	6.75111	3.41033	4.27498
arahy.X99BTJ	0	0	0	0	0.203077	0	0	0
arahy.FE9TG6	0	0.0639896	0	0	0	0.179008	0.0324933	0
arahy.5ELN25	37.938	0	0.0351289	0	49.026	0	0	0.0637642
arahy.3BX83E	16.7368	28.291	37.2531	9.79555	12.8195	16.3996	81.8065	16.5243
arahy.BRAD7V	0.370451	0	0.0335321	0	0.402967	0.0345839	0.0733013	0
arahy.52KDTF	31.9127	13.1349	7.6759	7.16544	30.5951	14.0483	8.27314	6.43153
arahy.286K5M	13.4544	8.22083	5.47916	4.37203	9.55093	8.72066	5.75015	3.64684
arahy.RZB3JM	3.05917	12.6777	6.64649	4.46304	3.28583	12.219	6.68604	6.67002
arahy.E5DFEG	23.6757	11.2091	17.582	12.1232	23.9761	14.4826	15.3903	11.8904
arahy.A3AWFZ	43.3433	9.73066	5.87444	5.26221	32.5545	8.40926	6.83967	4.84048
arahy.AN2TAK	1.19766	2.96585	1.20391	1.25425	1.33298	2.26708	1.52051	1.33432
arahy.Y4R4BV	0.608534	2.99708	0.19393	0.0256181	0.931219	1.84344	0.383154	0.0884253
arahy.4Z0G7J	0.124278	0.650117	0.330678	0.180747	0.0744286	0.522805	0.252712	0.0985925
arahy.43PCVQ	2.21098	4.12653	2.50535	3.69691	1.53716	3.74431	4.583	2.18612
arahy.H9FQ65	0.229513	0.227773	1.21951	0.581593	0.76315	0.300608	0.360869	0.661599
arahy.LQ8VWD	0.119383	18.0584	1.30647	0.116115	0.207663	12.1751	2.18493	0.107995
arahy.BW0B7M	8.60391	11.0853	10.3394	9.42042	7.92933	11.844	11.6057	7.1558
arahy.HXC8TF	21.3556	7.51564	2.16458	1.27584	17.6184	9.02944	2.17353	0.489501
Novel04019	2.64719	20.2658	8.93094	9.63312	3.36275	14.7244	11.7686	12.0811
Novel02579	3.31374	9.75116	7.9591	7.39594	4.61889	8.67994	6.26069	4.0818
arahy.56WBIF	0.849247	0	0	0	0.803161	0	0	0
arahy.4Y7J59	0.844438	2.60474	14.4633	16.6472	1.37485	2.18304	16.7322	13.7701
arahy.QS4KSE	1.64532	7.09032	4.94009	3.74149	2.47407	10.1328	4.27722	2.89257
Novel00148	0	0.145162	0	0	0	0.76175	0	0
arahy.LRXS7M	0	0.131195	0	0.199947	0	0	0.389593	0
arahy.Z20ZUZ	12.1731	7.37412	5.74559	5.98777	13.4767	7.74412	3.99108	4.13421
arahy.BSVD5H	0.633038	20.0124	2.35129	0.257869	0.484946	18.5353	2.58493	0.0985925
arahy.DLXF41	13.1655	0.724677	1.04226	0.148717	25.4895	1.13463	1.4066	0.255286
arahy.5BA4ES	3.59208	5.56864	2.93599	0.48748	8.92273	2.6927	3.1923	0.657782
arahy.V1US3H	0	0.156497	0	0	0	0.211029	0.0257335	0
arahy.70MDEI	0.31949	0	0.110139	0	14.5014	0.336494	0.115801	0
arahy.H3LZVP	6.86151	6.3199	4.38137	3.93174	7.28822	5.62704	3.80931	4.13942
arahy.NX1DPE	9.69448	13.307	11.9293	9.04928	8.17737	12.7913	13.8118	11.3171
arahy.YP19K2	66.397	20.1636	13.7808	18.1801	52.0258	26.9986	13.4416	15.2842
Novel02614	2.75444	6.68825	6.38765	4.64162	3.52555	7.94089	7.13381	5.8562
arahy.T1CM6G	2.84391	15.785	2.66744	1.34484	4.64591	11.752	3.06417	1.54126
arahy.TC9Y2U	0	0.0460559	0	0	0	0.123655	0.00803142	0
arahy.LV5WBC	1.79642	6.07743	2.80682	1.67445	1.53759	4.05317	2.55697	2.67407
arahy.7GR9X4	3.64906	43.7323	21.1916	9.87849	5.91177	49.8573	17.4464	6.48199
arahy.WR384C	0.550351	1.26461	0	0	0.0968538	0.537824	0.262295	0
arahy.7UV203	11.4449	5.27449	13.688	9.69307	15.4881	4.52733	11.6171	9.79037
arahy.ZH3G1A	1.78203	5.27587	3.71304	2.40603	1.27911	5.14345	1.90643	1.95632
arahy.YRK7KB	30.8567	7.1775	5.59048	2.16789	22.3517	12.42	4.85618	1.66949
arahy.RF2KBN	0.0128062	0.140321	0.043233	0.0289524	0.0234369	0.233263	0.0387852	0.0192586
arahy.59W0UK	0.568516	1.53969	0.884269	0.565934	0.818166	1.85302	0.723007	0.477391
arahy.Z17CL9	0.0397352	0.0453794	0.202001	0.0193204	0.145972	0.0774412	0.183528	0.243491
Novel03124	30.2392	1.84911	31.8647	35.3132	16.3875	4.18697	23.5921	31.0417
Novel05088	7.90282	9.70588	7.29164	6.9152	4.55729	10.8954	6.75985	5.44683
arahy.IC1SCX	0.109731	0.0747062	0.191206	0.206114	0.109575	0.104102	0.212203	0.365652
arahy.WY84UI	0	0	0	0	0.228377	0	0	0
arahy.5W9P8T	3.17223	1.71076	0.943781	0.883446	2.77779	1.79683	1.04585	0.944378
arahy.2Z03QX	46.8625	22.7846	8.61279	11.6806	33.2939	16.4522	11.5506	6.38547
arahy.HBQ2MY	0.195488	3.02075	0.210288	1.0104	0.0344031	0.0439575	0	0
arahy.Z5E7XJ	1.33942	2.92005	1.62762	1.4531	1.08342	2.83596	1.67898	1.15681
arahy.YBW5FY	83.5893	227.983	96.6609	60.2887	75.1116	142.638	71.3236	43.0947
arahy.640VZ5	0.0951936	0.16764	0	0.0200433	15.4821	0.0812655	0.0380013	0
arahy.F1TUFL	263.695	4.80143	24.8396	20.9674	320.869	7.85333	34.7134	10.5088
arahy.TDU0QQ	0	0.210822	0.09515	0	1.3492	5.9186	4.26384	3.48655
arahy.1N783C	6.10629	0.21315	0.220914	0.286153	4.88952	0.358239	0.233237	0
Novel01460	39.0027	60.7747	30.161	39.3627	20.1554	42.4672	38.8746	40.4462
arahy.BDJ8VI	0	0	0	0	2.55989	0.0448352	0.0262085	0.0477137
arahy.W2YUTZ	0.267394	1.4095	0.489983	0.509337	0.298506	1.05669	0.336446	0.180605
arahy.TNRR0X	3.19549	10.5495	3.40423	2.04388	3.17759	13.0358	4.52604	2.21195
arahy.08YRK9	221.977	366.617	232.623	127.563	149.946	266.686	161.501	90.6386
Novel02590	1.67449	1.31412	1.89366	0.0280572	3.70091	1.29459	1.03211	0
arahy.BJ67HS	0	0.373152	0	0.058371	0	0.482392	0.0495535	0
arahy.CW63DQ	2.09277	9.99873	5.56473	6.81526	2.77755	6.78208	4.38332	5.84037
arahy.NU6JGB	0.590393	2.51232	0.881202	0.550812	0.573325	2.09974	0.748596	0.60198
arahy.ER4998	1.14246	2.07388	3.03595	1.03153	1.2442	5.27653	3.08091	1.00646
Novel01743	0	45.218	0	0	0	22.9511	3.36225	0
arahy.C5WNZ8	0.507891	3.87776	0.446069	0	0.219113	7.03552	0.842081	0.0281576
arahy.08JA7Z	3.31422	4.74568	3.91105	2.28998	4.63034	6.04721	3.17471	2.27377
arahy.A7QGK8	3.43851	6.45614	3.62904	3.67537	3.99025	5.04623	3.55264	3.12032
arahy.38SPRB	1.42344	3.82146	1.95815	1.52302	0.804541	3.18618	1.60598	1.61545
arahy.KW7RVG	0.168944	0.274827	0.290224	0.11041	0.103062	0.374686	0	0
arahy.6F6BXS	0.0224236	0	0.0691281	0	0.0942205	0.275132	0.197572	0.0952435
arahy.5N45JG	0.0497734	0.194432	0.0415905	0.183154	0.0146949	0.109744	0.107845	0.118835
arahy.SA7FDN	0.193788	0	0	0	0.203567	0	0	0
arahy.T80YM6	7.07118	4.50455	12.901	22.9027	4.6062	3.7689	14.7946	16.1158
arahy.WTM8K6	1.93788	1.25078	0.499547	0.456269	1.40611	1.35113	1.04349	0.514154
arahy.G9AZJ3	5.94515	5.41482	2.98407	1.52388	6.81867	4.09936	2.77027	1.58642
arahy.HW27AX	1.02165	0	0	0	0.732412	0	0	0
arahy.CVX1Z9	0.0344063	0.316097	166.261	116.869	0.0209892	0.233068	173.976	146.511
arahy.184WBH	0	0.0698353	0.35859	0	0	0.100002	0	0.768144
arahy.27HM2H	3.24921	6.82109	3.19876	2.44585	3.88076	5.37727	3.05753	2.42185
arahy.W0YB5X	0.686853	2.20167	1.56511	0.794507	0.5205	2.08042	1.70253	0.525844
arahy.SLB1RJ	3.58879	6.14404	1.8956	1.50341	4.33284	5.69896	1.59713	0.927374
Novel01337	0.105291	3.33241	0.835482	1.28377	0.0151296	0	0.0102433	0
arahy.KRAQ4G	0.0529915	0	0	0	0.105334	0	0	0
arahy.R82SJU	1.59881	3.2833	3.71128	2.3307	2.38846	5.90604	3.55094	3.072
arahy.76S2NJ	1.08338	0.984428	7.05646	0.0243047	33.3982	13.7784	11.0845	13.1225
arahy.TJ0W48	1.41531	0.867983	0.624485	1.0266	1.67967	0.687905	0.671929	0.244655
Novel04730	0.498015	4.7987	1.65264	3.42579	0.142178	4.22214	2.67134	2.20223
arahy.VRPR0Q	1.80688	1.46803	2.16985	0.952735	4.76652	1.57411	2.02056	1.34584
arahy.MCAP06	4.84305	0.448558	3.99321	3.39463	2.78652	1.5211	3.75376	0
arahy.CVA9UE	3.89113	0.0984417	0.320874	0.169238	7.52773	0.393524	0.588236	0.197479
arahy.XI4PBL	0.0494567	0	0.0586578	0.0421984	0	0.0290975	0.267241	0.112278
arahy.6RZF8I	14.3851	25.719	19.4233	13.7739	14.9565	26.665	27.3045	19.0741
arahy.QQU7J2	6.05749	11.1835	7.01761	2.52935	9.47939	8.74952	5.75624	2.14756
arahy.081E2U	7.0131	59.1108	21.3318	12.6416	5.78955	35.1299	25.6607	10.0131
arahy.1TFV27	0.195866	0.361821	2.25143	2.01821	0.892184	0.972272	1.72947	1.0905
arahy.X9W7N3	0.0222308	4.41316	0.656743	0.374208	0.627638	3.35166	1.43938	0.0271096
arahy.PI996E	2.60799	9.58212	7.38351	8.84806	3.22423	13.7875	7.65516	8.24307
arahy.R81B49	0.80859	14.3135	1.54219	1.51442	1.31638	9.81033	3.10033	1.13368
arahy.431KH3	3.3392	9.89363	2.81698	0.6657	4.47313	9.15555	1.69572	0.311188
arahy.PS0MXP	1.26046	14.6752	3.64321	4.4166	1.60391	5.62558	1.53313	1.85577
arahy.ZDI5XK	7.94196	11.6766	2.20276	1.48085	6.40488	9.02398	2.63372	1.5306
arahy.MUU2SN	0	44.3344	0.102144	0.0328773	0.0206125	42.6398	5.3494	0.0508131
arahy.24XWVK	5.80948	36.7279	18.8393	27.3393	4.06648	28.8822	19.5329	18.4103
arahy.3CRQ59	8.64558	14.7573	29.7948	15.2743	12.8077	24.0777	19.0534	12.1155
arahy.KQ45IK	11.1953	13.5838	23.5597	20.0658	11.9444	18.6563	23.2087	24.2995
arahy.Y34PHS	0.84713	4.9501	1.4743	0.77301	1.73961	6.44716	3.4349	1.34155
arahy.R6C5BS	19.4867	4.99237	4.17608	3.192	15.7378	3.66963	4.25962	1.40438
Novel04626	0.724391	15.7117	51.1668	47.1547	1.48712	28.0105	40.8315	40.7621
arahy.50BPU8	3.05211	23.7559	13.6938	9.83071	3.60991	20.965	12.078	9.39554
arahy.89Z5DT	3.97787	6.84191	4.26747	2.71157	4.05904	6.42428	5.06455	3.49093
arahy.P2DQEA	0.232979	3.02799	0.66026	0.72644	0.27164	2.13038	0.789926	0.389351
arahy.YED2LC	3.66014	24.029	12.5946	8.21881	3.19359	23.1858	10.0939	7.45012
arahy.61WA32	4.13552	2.66282	4.72671	4.38164	4.12265	2.34949	4.20577	3.75788
arahy.ZJ3UGF	8.73282	8.02008	4.33685	3.00381	17.401	5.56714	4.7705	3.55635
arahy.5C0RMJ	14.0056	11.0241	8.08331	7.1009	14.6596	13.0971	9.47052	6.07563
arahy.G24WC3	0.0670409	1.47637	0.1611	0.218109	0.106188	0.628606	0.0478122	0.101396
arahy.HD7TF9	1.82939	0.159548	0.233375	0.106268	1.33777	0.238569	0.140656	0.241083
arahy.4AVB6E	0.109802	0.183868	0.217672	0.0913071	0.103599	0.207229	0.163436	0.133899
Novel00904	5.88625	11.6953	9.48558	8.96831	6.7837	16.8647	8.28978	8.12945
arahy.1233S2	0.871396	1.18579	0.252749	0.0757987	0.499863	0.812339	0.331895	0.110108
arahy.I9FVBP	19.6436	18.5754	11.8474	11.4836	16.2418	15.376	10.0747	10.4235
arahy.0N164V	6.2769	5.03991	3.53252	2.97311	7.32713	6.65902	4.14297	2.38305
arahy.XMHW97	0	0.150981	0.0889315	0	0	0.079978	0.132456	0
arahy.AU03DZ	0	0.103429	0.0526933	0	0	0	0	0
arahy.IQ9SDZ	0	0	0	0	0	0.423188	0.0480585	0
arahy.256EAD	27.4625	34.7752	30.3379	32.5376	22.3198	30.37	32.6798	38.3066
arahy.WSUD3I	2.2098	6.29236	3.2974	1.60753	2.79156	5.22403	4.1512	2.23675
arahy.IHD6K8	0.0292759	0	0	0	0.67021	0.191962	0.103433	0
arahy.7M3CIR	0.0260063	0.803792	0.350933	0.245268	0.0749545	0.0203599	0.00507471	0.0260939
arahy.DG0M13	0	0	0	0	0.151276	0	0	0
arahy.WX7AU9	2.41167	5.37198	7.97119	7.26737	9.57546	10.2809	12.6321	7.38634
arahy.97KQTU	32.8861	9.34791	4.49942	3.13549	39.136	4.51838	1.68757	4.66485
arahy.F7AUT2	14.7361	5.93625	0.530966	0.0724934	7.87348	5.05597	1.07143	0.344258
Novel01985	0.916373	4.59476	2.79468	2.45995	1.23264	5.02271	2.98608	3.23499
Novel04484	0	1.02087	0.0235068	0.0709191	0	0.857819	0.119894	0.0853367
arahy.NQ3RL0	3.63194	10.2096	4.60941	3.73628	4.56566	7.03069	4.4285	2.87923
arahy.DXU8TV	3.81674	8.14497	2.77232	2.75596	2.111	5.47677	2.77343	2.30396
arahy.WLW17E	9.66889	9.91372	25.6789	16.1021	8.3515	16.2585	19.4992	12.9389
Novel04914	0	1.12579	0.0166354	0	0.0310807	0.445727	0.0848472	0
arahy.I6Q85W	12.0311	1.49244	1.4689	0.403739	9.12713	1.79351	1.78146	0.162857
arahy.RSK4RP	0.283743	0.999795	0.0732664	0	0.13185	0.458706	0.032461	0
arahy.686ZKJ	0	0.0478953	2.89378	1.98322	0.137249	0.248853	3.42703	2.4207
arahy.QMPX2M	15.8572	12.6363	5.15066	2.6368	12.565	14.531	4.54199	2.57861
arahy.YYB4W1	0.0740353	0.142189	0.220151	0.0292076	0.0813758	0.154699	0.0495911	0.0902829
arahy.XIUN11	2.39718	5.01261	1.87099	1.75459	2.01409	3.76787	1.72145	1.92026
arahy.3RW2WH	1.56161	1.92438	0.667763	0.577455	1.43688	2.25994	1.22303	0.353696
arahy.400YCD	9.72745	8.85865	9.27667	7.74395	10.0046	11.9578	8.10409	7.75077
arahy.HP8L6T	9.75382	4.84722	6.42292	3.27572	13.0078	7.54984	4.27731	2.88284
arahy.W9J1TW	26.551	27.7166	14.0224	7.06943	22.2307	29.3634	12.2151	6.03215
arahy.KF5FYE	0.647988	3.84078	5.05487	3.1128	0.890936	4.34412	6.30493	4.04017
arahy.W5W2QE	6.34974	0.359954	1.08433	1.216	6.12343	1.20111	1.411	1.44645
arahy.U2II3I	27.5126	35.6775	36.3553	16.8196	33.9107	56.8427	36.1658	23.4131
arahy.N0EKR1	11.069	12.2573	6.37527	5.77387	9.3257	10.2465	7.52204	6.30175
arahy.I04ECN	0	0.562222	0	0	0	0.367467	0.0374064	0
arahy.RW8FUD	3.46928	1.06005	0	0.0613847	2.51685	0.904472	0.0448568	0
Novel00849	0	0.319199	1.15237	3.31784	0	0.256736	2.15231	2.01488
arahy.FI74S6	0.116435	2.66604	0.202173	0.284078	0.0931122	2.18792	0.51609	0.341102
arahy.VJZ5NC	0.711742	1.47412	0.827467	0.529972	1.02593	1.58321	0.736267	0.723553
arahy.Z0P5BB	12.8845	11.0044	7.63391	6.46358	12.3502	9.58601	6.91231	5.09836
arahy.HGAE8N	5.87756	6.61231	6.44781	5.83766	6.26071	6.24349	5.06855	5.94783
arahy.0M84PE	0.0200544	0.408871	0.0983204	0.126432	0.027003	0.359408	0.250737	0.146733
arahy.2CK2M8	1.43968	10.8758	3.94517	3.25793	1.60283	8.91241	3.47997	2.98137
arahy.PCN789	4.29895	0.749053	0.818139	0.927293	1.89701	2.3016	1.01587	0.578469
arahy.GV9VS9	2.94487	2.02044	3.28801	4.48204	10.0563	1.92892	2.88772	4.27053
arahy.CP8KSN	0.0377582	1.16798	0.544058	0.845759	0.0533151	0.631198	0.74332	1.20435
Novel02835	0.347021	1.97579	1.0738	1.36571	0.586713	1.46365	1.03402	1.34992
arahy.K4VGVT	0.0460458	0.327869	0.166034	0	0.0328879	0.514926	0.229037	0
arahy.X1IMZB	26.9107	19.088	12.0784	7.92517	28.8907	16.2662	14.2626	8.7577
arahy.L5CKR4	0.367423	2.8109	1.54388	1.23201	0.578493	2.43576	1.6531	1.31781
arahy.A3A4LS	13.8995	11.7926	10.8712	13.9629	12.0342	12.4772	12.9178	12.3092
arahy.8PBG0P	5.57375	10.0879	5.90284	5.91022	6.36314	9.48997	7.78371	5.69179
arahy.KIS5CH	0.448822	3.55848	0.793947	0.65768	0.430526	2.80779	1.36059	0.453375
arahy.EJWE4G	0.101758	0.0754751	0.231214	0.10702	0.0534462	0	0	0
arahy.0U5UXQ	5.24027	11.2289	8.15592	6.16075	5.32933	12.0538	8.40807	5.0337
arahy.34604J	0.459641	1.5049	3.11117	6.95898	0.26951	1.18925	4.81862	10.8498
arahy.WGK629	0	0	0	0.0396971	0.110601	0	0	0
arahy.MEQI9D	6.89699	2.42436	7.21125	2.83447	8.88092	2.77171	14.2841	3.51678
arahy.LEI4AX	4.07807	0.329457	0.1196	0.461692	1.91082	0.378915	0.44247	0.172844
arahy.LGH8AH	0	0.65022	4.89539	1.4463	0	0.446484	2.0409	0.959643
arahy.0D471F	2.12203	1.98582	4.87561	6.54104	0.961368	2.75919	2.42655	3.884
arahy.QLS7YN	0	0.137824	0	0	0	0	0	0
arahy.P1R172	0.490029	7.19082	2.48397	1.09164	1.3873	6.08021	3.85035	2.60151
arahy.N1E5J3	29.8901	4.26148	4.8834	6.33944	24.3494	7.42507	6.4182	7.40684
arahy.RYRE4P	9.27591	4.0982	3.98731	4.65771	7.6261	4.85567	4.00043	4.7244
Novel02447	0.321355	4.07074	0.941555	1.15614	0.0726008	0.726696	0.399633	0.415743
arahy.31ALDJ	0.04854	0	0.0575706	0.0414162	0.923418	0.0285581	0	0.0550985
arahy.T6QC8B	58.4925	9.61264	7.6507	5.37264	28.5692	7.54674	7.43806	3.1434
arahy.L22S2R	0.0953824	0.243764	0.0587584	0.292158	0.873883	0.273523	0.258149	0.175047
Novel03228	0.202502	1.00423	0.8223	1.12579	0.114786	1.12676	1.13464	0.974199
Novel00027	1.11118	2.29634	2.08351	1.37878	0.816874	2.91383	2.33619	2.33686
Novel01153	0.829168	2.82143	1.90719	1.05607	0.855208	3.5905	1.63397	0.981053
arahy.SWLP8S	0	0.131904	0.331817	0.0783737	0.0846003	0.320941	0.379584	0.204454
arahy.NXB9BB	3.40319	9.58413	7.02432	6.96241	3.42338	8.2991	6.95132	5.72825
arahy.BUN8CC	1.14329	5.54889	6.43086	6.89387	0.483477	5.40483	4.10028	4.10701
arahy.43Y796	0.166981	6.16175	1.75159	1.51527	0.672435	3.14126	1.22987	1.03416
arahy.46WQAQ	0	0	0.121627	0	0	0	0	0.0981044
Novel04584	5.38593	24.3151	1.7862	0.875833	3.76228	8.6258	2.01116	0.15239
arahy.H5H05M	25.543	10.6759	5.9957	2.49986	22.7706	9.03318	5.75291	2.39915
Novel00907	4.75857	12.851	8.11898	6.77263	4.93536	16.2861	9.11021	6.02788
arahy.ZRB62E	0	0	0.132732	0	0	0	0	0
arahy.S31KRA	3.34816	9.48005	9.02169	5.71774	3.60519	12.1628	8.82323	6.03821
arahy.I68A9W	5.03741	10.8318	8.54722	5.40452	4.23542	14.7309	8.55885	8.02694
Novel03303	1.13339	8.06308	3.86461	4.95754	1.75228	8.38804	3.81961	3.4194
arahy.17BKMA	0.891229	0.0181753	0.0322694	0	0.669275	0	0.0508921	0
arahy.A40EG2	0	0	0	0	0.61622	0	0	0
arahy.9ACL7S	0.250156	0.0661572	0.22358	0.0958433	0.179674	0.273425	0.171654	0.0438589
Novel01516	0.398644	2.87862	1.91754	1.60221	0.679979	2.52784	2.11741	0.849856
arahy.VJ96GR	15.1169	16.4803	8.48221	7.44343	12.9887	12.4165	10.6511	6.5907
arahy.1L4TQ6	0	0.193545	0	0	0.238778	0.488033	0.107775	0.196209
arahy.32X8AD	0.162833	0.771932	0.746069	0.637736	0.0966597	0	0	0
Novel02059	0.461787	2.34804	1.26225	2.31119	0.475907	2.00284	1.21245	1.17406
arahy.51I078	36.6845	29.5958	9.82081	4.61824	30.523	32.9646	12.0342	6.67204
arahy.B8KTAH	5.10945	9.49988	6.64739	4.00747	5.24603	13.6469	6.17227	2.58604
arahy.W2GM19	4.00458	6.95861	6.00212	4.12375	3.9411	8.22514	6.54197	5.8282
arahy.S4YUBI	59.0512	47.276	20.1197	14.9681	51.3681	38.3195	21.677	17.957
arahy.B0YTQL	0.731523	0.633743	0.399548	0.174419	1.2152	0.173911	0.283516	0.262606
arahy.2DXY1G	0	1.60817	0	0	0.202661	0	0.975621	0
arahy.1JV6NN	1.90966	1.43648	0.971922	0.930566	2.28926	1.35656	1.52757	1.4599
arahy.5SN4J9	0.815247	0	0.446275	0.25414	1.08281	0.975444	0	0.583134
arahy.D6TL18	1.24936	0	0	0	1.66509	0	0	0
arahy.IMEV7C	3.54488	1.96293	0.827474	0.613986	3.39814	1.79262	0.7067	0.731234
arahy.RL39CN	0	0	0	0	0	0	0	0.2043
arahy.MB6FU1	3.75909	7.44094	10.2965	4.28937	4.37559	13.3338	8.67426	3.7522
arahy.EC17FL	0.360564	1.76335	1.05679	0.823203	0.637822	1.65334	1.55087	0.921417
arahy.A2R99Z	0.114553	0	0	0	0.1587	0.0159253	0.0207602	0.0377948
arahy.QWSB5M	9.99408	43.1362	23.7482	15.0657	10.6219	31.6001	28.3647	16.3421
arahy.RS06VI	1.1203	14.9106	7.88859	2.10172	0.513727	17.059	6.35497	1.59622
arahy.1IC1A8	0	2.56739	0.265129	0.245534	0.0669315	0.43542	0.261028	0.201336
arahy.U63JN6	0.0850169	0.327475	0.0642518	0	0.512818	0.210265	0	0
arahy.HCCD38	1.00858	0.753927	2.66946	0.510989	0.758841	0.179619	4.61691	0.376647
arahy.FYP25E	5.28493	11.0879	0.732363	0.714619	5.28722	6.3814	1.20369	0.678584
arahy.6I0UY5	0.106374	0	0.106477	0	0.0759772	0	0	0
arahy.WE2A0Y	4.62385	13.5044	4.66285	3.86403	5.25865	12.9471	4.15592	3.15908
arahy.K80GAS	1.39234	2.29457	1.1901	1.60078	1.261	1.77038	1.12557	0.937777
arahy.H67YCB	1.07917	0.208451	0.109	0.548737	1.2926	0.145526	0.23215	0.538781
arahy.DLKB6Q	0.0159097	0.612565	0.669522	0.0662153	0.264658	0.0450508	3.54795	0.108356
arahy.F01EC9	13.1381	49.6377	33.5638	33.2758	15.0139	48.9418	43.2633	48.4683
arahy.58SQTR	7.2749	7.74571	3.77296	4.13705	5.67523	7.90209	4.35388	4.3362
arahy.T6M1B4	6.09752	3.16063	2.2335	1.10695	10.0531	4.10883	1.69358	0.960972
arahy.T1UFTC	0.0178801	1.80892	0.491274	0.540551	0.13129	1.51788	0.758148	0.585392
arahy.08H2K0	4.45882	1.78998	0.257587	0.291491	6.43426	2.36661	0.738572	0.0252126
arahy.ES60GW	0.0944229	0.251694	0.13764	0.132409	0.0450357	0.12233	0.193094	0.0555101
Novel04528	1.39761	1.0946	0.221144	0.586185	0	0	0	0
Novel03960	1.75161	13.4123	6.14604	8.21482	1.92422	9.13968	8.36312	6.88245
arahy.LMSP6K	0.75113	1.52231	1.72041	1.51016	5.8676	2.78834	2.38353	1.46588
arahy.E4EMQ7	3.30939	7.3822	3.74984	2.50375	3.49746	7.04033	3.42977	2.29965
arahy.AM2AK0	0.9469	2.95463	1.4508	0.840345	0.758368	2.58197	1.43597	0.632173
arahy.8ZV6UW	2.04029	3.28567	2.8369	1.5848	1.69737	3.3774	3.00859	1.1728
arahy.CFLV5S	3.37247	2.19978	0.145222	0.12732	6.95443	0.337681	0.084618	0.096697
arahy.BTPC7R	3.08174	7.5037	2.71577	3.55852	0.269962	0.212428	0.14622	0
arahy.503TH3	10.3258	14.0545	13.0673	9.82419	9.1435	14.9849	14.499	12.4394
arahy.KPH33C	3.79553	0.945148	8.98201	15.7067	1.89118	3.67723	8.88229	3.59912
arahy.TFW9WI	0.400265	0	0	0	0.464086	0	0	0
arahy.JT7MF5	0	0	0	0.366296	0.915096	0	0	0
Novel02397	0.9363	6.48502	4.42908	4.01818	0.678769	4.5861	5.10117	3.53372
arahy.GU7NVA	0	0.184416	0	0	0	0.175675	0	0
arahy.5H4VUK	0	0.0608478	0	0	0	0.10718	0	0
arahy.C2CW14	16.6821	43.0625	12.0125	8.33097	10.8671	38.2033	12.1312	7.91352
arahy.GX1WML	46.3204	5.24583	14.0035	14.3827	41.477	6.92426	11.7112	11.9862
arahy.MD6CKA	2.72451	0.0897116	0.271159	0.123538	1.21541	0.128464	0.125599	0
arahy.G45YPI	0	0.214814	0	0	0	0.225745	0	0
arahy.5I5ID6	6.2916	6.55624	3.15169	3.85528	4.85513	5.63538	4.52461	3.94949
arahy.CDDT8Q	0.0864605	5.00536	15.1422	13.8943	0.0226873	13.9151	12.0422	15.728
arahy.6W0K3P	162.327	442.212	328.754	77.7218	154.769	441.782	362.537	104.325
arahy.T4YGUP	0.358735	0.132528	0	0.0728532	0.197072	0	0	0
arahy.C8LMSE	0.813464	2.92965	1.98917	1.52097	0.816733	3.50519	0.652031	1.70211
arahy.1V1YWD	0	0.361117	0	0	0	0.0806731	0	0
Novel01493	3.57844	9.12855	6.26634	5.63739	1.99945	10.6952	4.71722	4.72903
arahy.IS160S	0	0.0763086	0	0	0	0.115557	0	0
arahy.TEZ5MC	0	0.0777625	0.0180635	0.198033	0	0	0	0.0359439
arahy.X97YI5	0	0.7697	0.209327	0.0333043	0.0417603	0.5	0.0848201	0
arahy.HX099N	2.56227	27.0742	7.16489	5.98588	1.64669	14.379	7.16621	4.56465
arahy.HHGT95	7.7122	14.4184	5.42317	2.78289	6.40656	15.1358	4.12872	2.47153
arahy.BVUT3K	11.9106	2.75141	2.20784	0.536346	18.0142	2.52704	1.65645	0.430806
arahy.3317JQ	4.26924	7.90117	8.95171	6.24953	4.93691	9.03919	8.45301	6.50136
arahy.56UX32	12.4552	34.7457	18.6123	10.6842	8.84789	26.7556	21.5214	12.6274
arahy.FN32SY	0	0.556485	0.149078	0.130838	0.141251	0.0852056	0	0
arahy.YW7PU2	0.685645	2.33872	1.14456	1.6354	0.685425	1.8496	1.28304	1.18251
arahy.RJA1IC	90.4633	0	0	0	140.83	0.0419605	0.0546997	0
arahy.9IQG37	5.33274	7.16643	3.59709	2.26828	4.44039	5.98432	3.70338	3.13824
arahy.25MAD8	1.36233	3.23506	1.94651	2.0466	1.40498	3.10398	2.25504	2.36103
arahy.P264ZS	2.2208	3.67349	2.11037	2.7218	0.918518	3.49059	2.77617	1.93724
arahy.AGL6EL	4.58844	15.1497	7.82108	6.28032	3.39297	17.488	7.73647	7.02357
arahy.4HMS3J	0	0.391159	0.166975	0	0.0537717	0.0622794	0	0
arahy.76SLUU	0.809071	0.104151	8.2831	14.9693	6.82041	0.088655	4.99439	4.80351
arahy.X4TTMB	0.164712	0.308155	0	0	0	0.647049	0.109115	0
arahy.R2ZWGQ	3.51789	5.71037	5.06263	5.44989	2.9789	6.8014	5.78602	4.83581
arahy.UD5THM	3.87612	1.42634	1.73952	1.70966	3.07274	3.52132	3.02351	1.67157
arahy.DLTY52	1.00547	1.88572	0.598836	0.640973	1.13966	1.67917	1.00075	0.882532
Novel00981	52.6032	18.6365	34.2087	23.7217	45.8853	37.1864	28.6063	19.2267
arahy.5FG7TI	88.9378	3.83229	1.23277	2.38919	131.337	1.87994	1.27375	0.876534
arahy.6IQ3WR	0.760814	0.0140682	0	0	0.641023	0	0	0
arahy.QD5JHM	212.797	77.4031	56.2619	25.9021	206.832	60.3613	77.3571	31.2624
arahy.10MHJ6	16.041	38.4735	21.0989	14.3699	16.9698	39.5046	25.8296	18.7806
arahy.TK6Q6V	21.1772	0.168251	0.133508	0	21.1855	0.0727	0.0146701	0
arahy.305ARZ	0	0	3.55946	2.85886	0.0378122	0.0770296	1.66908	1.43576
arahy.KN0SQQ	0.989052	7.75159	14.1907	5.40111	3.74941	5.61261	4.86827	3.54968
arahy.IMA97E	1.12865	0.197298	0.750514	0.264885	0.757671	0.787358	0.293264	0.596003
arahy.7VY84B	4.3863	10.5217	3.64012	3.6302	4.15417	10.1283	4.95141	3.58276
arahy.PUF87X	11.6926	11.792	9.1973	7.66043	11.781	16.2567	8.63525	6.89499
arahy.ICL3YR	0.0724734	1.65421	0.922504	0.912564	0.187809	1.77564	0.914129	1.07205
arahy.RIV6ZB	0.124974	0.202323	0.623132	1.00816	0.368822	0.101582	0.584552	1.51949
arahy.SCS43X	0.798112	1.78929	1.24044	0.917796	0.633283	2.35986	1.17788	0.766062
arahy.08VBYE	1.88208	3.90515	2.08454	1.79049	1.74676	3.24732	2.77698	1.92435
arahy.PRAL1M	0.0376525	0.0503055	0.0661364	0	1.6524	5.82404	2.66057	2.41137
arahy.E42PRM	0	0.208761	0	0	0	1.83612	0	0
arahy.BS0ST2	0.552181	0	0	0	0.391893	0	0	0
arahy.M1AC1B	0.115429	3.76013	1.1947	1.33297	0.404861	3.85657	1.08645	1.3799
arahy.BF8KC1	0.151758	2.31881	0.178697	0.0998208	0.0459886	1.33138	0.590655	0.185952
arahy.K7GDTJ	0.136206	0.0383671	0.0444307	0.0146183	0.121394	0	0.0391658	0.0354802
arahy.253MNK	26.4221	15.7069	13.6253	10.1949	25.2782	15.8822	12.3897	8.1482
arahy.679W5T	19.2762	13.3626	17.044	12.0782	15.3196	18.4652	12.8429	10.5155
Novel03425	1.26387	7.26859	3.2305	4.26448	0.613302	0.252072	0.151798	0
arahy.G1MIMQ	1.09998	6.53921	4.12122	3.41638	2.11484	6.14353	5.81735	3.25072
arahy.CG2Q6Z	0.10774	0.168261	0	0	0.0266482	0.1384	0.0962145	0
arahy.Y4W2TZ	0.216319	10.657	1.44901	0.818915	0.338412	7.53772	2.04293	0.479717
arahy.NU2AG4	2.20533	2.68475	2.82928	4.61217	1.88533	2.82997	4.91787	5.38201
arahy.B1W2SN	0.0411586	1.63743	0.0383686	0	0.151569	1.30582	0.220992	0
arahy.GH5A87	0	45.4422	2.84113	1.86519	0	43.1372	7.06275	3.49786
arahy.UU5SAX	0.157508	0.646984	0.496307	0.642563	0.116391	0.824292	1.07129	0.828793
arahy.0093F6	1.81357	1.78366	1.00149	1.13813	3.53412	1.71496	1.07084	1.17602
arahy.49L2N7	0.0488032	0.200222	0.0330316	0.0494064	0.0933202	0	0	0
arahy.W7JQAT	134.571	771.887	402.967	232.606	152.875	535.658	316.035	210.447
arahy.3U28WJ	1.11083	2.28101	0.649068	0.341332	0.754843	0.68736	0.275556	0.0915299
arahy.EXPS8P	1.43923	16.8176	4.02638	2.67001	1.5072	15.5769	4.7899	2.80429
arahy.63SYA1	0.903276	1.46385	0.372269	0.325602	0.563943	1.04	0.378099	0.267719
arahy.GCX8RD	0.809187	0	0	0	0.752204	0.0405347	0	0
Novel01304	0.267631	1.13803	1.5598	0.767607	0.277412	1.77274	1.37885	1.0099
arahy.4890K4	0.42072	0	0.230994	0.304	0.0410146	0.0426028	0.055537	0
arahy.M8HB72	0.407884	0.712241	0.349897	0.147204	0.501601	0.431357	0.261542	0.262874
arahy.ULK9GC	30.204	14.0783	8.41775	9.1942	18.1629	12.8706	8.07385	10.4798
arahy.E8Y2WS	6.8986	10.8487	6.12116	4.49785	8.97763	12.9341	6.1831	5.22595
arahy.ZVK5KU	14.4981	19.2523	8.22177	7.01474	10.8598	12.5285	8.29792	6.76226
arahy.76FTKD	54.2495	6.27928	8.31966	7.56408	58.8799	5.35602	9.9264	7.91956
arahy.SXYG7Q	3.49418	2.20895	8.41864	3.92244	5.35603	3.48279	8.73794	4.07435
arahy.15GK1E	0.469123	2.78538	1.08741	1.27326	0.354302	1.85171	1.12152	1.16786
arahy.G84CIW	4.50157	0	0	0	3.15936	0	0	0
arahy.QBU7FE	18.661	11.4978	13.7675	11.1386	19.3858	15.7997	11.8603	10.4622
arahy.4WNI95	0.225099	0.0636715	0	0.0350013	0	0	0	0
Novel00886	1.53652	3.42363	3.59986	2.7871	1.25671	5.02262	3.10166	2.06286
Novel04288	0	0	0.168801	0	0.465373	0.708155	0.384523	0.161552
arahy.KV6AVL	3.53205	6.14756	4.37718	3.61918	3.46592	5.98544	5.12966	4.68941
arahy.LX21RY	0.0662726	1.01871	0.116612	0.126436	0.121807	0.612501	0.300495	0.177029
arahy.1I9988	0.104308	0.484133	0.447399	0.609319	0.184999	0.618873	0.411653	0.295364
arahy.HM8GZE	22.9516	8.57262	20.0958	16.0978	16.4419	12.9774	19.9825	17.7951
arahy.LUSX59	0.643495	0.53443	0.58115	0.184628	0.324017	0.57346	0.641289	0.382406
arahy.0Z73T7	1.98601	5.94393	3.5821	2.0214	1.69705	7.19467	3.53334	1.7593
arahy.JG4R8Z	7.67912	28.6389	8.34968	9.92277	7.18719	22.3197	12.1548	11.1685
arahy.MHZ7HR	0	4.444	6.53003	8.04465	0	5.85733	7.21184	8.89698
arahy.SJ63PZ	6.81521	9.79566	5.7634	5.67022	7.97325	8.61427	5.09946	5.97265
Novel02867	3.97999	4.7982	3.22556	2.78441	3.80614	4.04743	2.06613	3.14724
arahy.TSCV7K	1.17672	9.83454	2.997	3.8742	1.05156	5.36832	2.9743	4.04301
arahy.6ZS3XW	0	0.129864	0	0	0	0.301334	0.181169	0
arahy.W7W61Q	0.800795	3.34165	0.688611	0.427545	0.348478	2.12796	1.10693	0.399091
arahy.0M6VMZ	0.182211	0	0	0	0.605061	0.0555211	0.0588392	0
arahy.8F4Z70	13.9563	11.5064	9.7694	8.17214	10.8231	10.899	10.1972	8.84535
arahy.M2KJPF	0	0	0	0.442824	0.0606707	0.23147	0.0410764	0.149563
arahy.NDX0CI	1.08833	2.64518	16.8495	11.8259	1.63806	3.83943	16.6968	18.0598
arahy.F0QQQY	2.86513	0.0541554	0.472982	0.0729654	1.55723	0.189398	0.279572	0.162038
arahy.0X38XU	0.319468	1.29435	0.948323	0.488991	0.744799	1.95012	1.17149	0.460489
arahy.21AGFE	11.0799	8.48973	6.43573	6.38715	8.58795	7.96003	5.35148	5.45638
arahy.1ING2C	0.192137	0.0465248	0	0.0157873	0.572808	0.022961	0	0.0181642
arahy.734U7E	6.84128	4.85901	2.15778	1.87637	5.01593	5.53476	2.81448	1.54182
arahy.ATW5XU	5.27034	0.367394	0.726958	0.409376	1.73444	0.796238	0.586824	0.206918
arahy.4GH0FM	2.07764	139.174	33.2112	36.9823	3.49441	80.6605	46.6504	19.1159
arahy.AGV1MP	8.17909	7.56387	6.2839	5.26053	9.67254	8.23037	7.98211	5.44329
arahy.F05X50	0	0.973571	0.10117	0.062649	0	1.27315	0.0531853	0
arahy.QI0PHV	3.0059	12.8879	3.32155	2.16384	7.08693	10.0127	4.44648	0.873795
arahy.LP1JBF	152.408	163.109	122.198	115.294	158.709	190.026	117.724	89.511
arahy.MJC4G5	16.4718	9.2415	14.7787	11.2436	15.7801	18.6894	13.8883	13.4634
arahy.U4Z5MQ	11.8177	47.6086	17.2588	23.2786	9.51504	37.8648	27.7995	25.8157
arahy.LC1BIY	55.5883	29.3905	8.2983	7.7618	44.4539	26.5642	7.57204	7.03137
arahy.Z26Q8L	4.29421	9.47424	6.88216	4.50795	4.52394	10.7835	10.5478	6.56342
Novel04418	6.24462	9.12484	4.3646	2.44549	3.85327	8.00731	5.33095	3.12706
arahy.U0I2TY	0.0303445	5.05414	1.11071	1.61569	0.0838352	4.09276	2.01173	1.38434
arahy.DWV9W6	9.39807	10.3748	5.27424	4.85533	8.11177	11.0365	4.4853	3.91554
arahy.4KDB7G	13.3908	9.4994	8.22498	8.81439	11.3848	7.89997	8.82655	8.593
arahy.1T4KVN	0.300778	0.219727	0.085747	0	1.22868	0.277551	0.136454	0
arahy.W2KP9A	158.225	0.0454187	0.696171	0.554846	97.3593	0.507471	0.376802	0.817315
arahy.9CWW4B	7.88471	8.34072	3.90071	3.49062	5.77751	8.16955	3.96182	3.58162
arahy.Y3WDI1	9.61497	57.4637	7.89917	10.2591	7.64591	37.2804	15.9873	14.453
Novel03092	0.77797	2.74866	2.99909	3.74101	0.179648	0.904897	0.064824	0.433676
arahy.ZPSV32	6.9986	12.0483	8.39615	7.35411	7.25663	13.1222	9.45947	8.95684
arahy.IME475	21.5219	14.8897	14.068	9.80513	16.4128	17.9553	14.6767	12.4171
arahy.5P3U81	0.388034	0	0.0472385	0	1.13258	0.0190498	0	0
arahy.SM0BS0	6.36489	0.746365	2.30938	2.45443	12.3704	0.937107	1.95414	2.08066
arahy.0698HC	20.0107	20.5165	13.0021	9.70423	16.3494	16.9874	12.1979	8.88341
Novel03165	33.5838	4.62578	6.54132	3.88951	33.0102	5.17499	4.36141	3.20222
arahy.1A5FNX	3.42513	8.0879	6.89312	4.76502	4.20414	8.16496	5.82524	4.39829
arahy.YKJ7BV	1.86663	4.94786	1.35283	1.21805	1.57896	4.17573	1.77926	1.42565
Novel00357	3.70619	3.93619	2.11191	1.59968	3.08076	3.50454	1.99468	1.38096
arahy.WQI89G	0.727894	2.84562	3.55954	3.29255	0.698371	4.17324	3.76343	3.54333
arahy.A6I4VR	4.68992	13.4807	7.66164	7.61822	4.18886	13.4701	7.12311	6.40334
Novel00533	2.39079	0.918853	0.350856	0.656057	4.68039	0.311544	0.175229	0.89776
Novel04456	2.38393	8.07801	2.59696	4.87829	1.03585	2.70565	0.628577	0.828152
arahy.ZW6KD7	0.198267	0.0596547	0.0509414	0	0.16523	0.0833532	0.074232	0
arahy.9C3ED3	7.96777	11.2657	7.95323	5.79322	7.38135	10.9066	8.71197	7.40061
arahy.XH4U3Y	1.37406	6.85999	5.46329	3.04329	1.7232	11.3953	5.1781	3.50698
Novel04449	0	0.458002	1.70385	0.0651598	0.113192	0.362618	0.32944	0.723372
arahy.519MSC	0.306545	1.25937	0.575353	0.913368	0.144193	1.04616	0.377946	0.68625
Novel03313	6.53896	24.5579	11.6796	10.3127	5.36819	18.6486	11.1928	7.17633
arahy.A3CMUZ	0.423477	0.543234	0.322435	0	0.932262	0.532214	0	0.153108
arahy.0QBZ7D	3.58346	2.37141	1.39953	1.59223	2.51722	1.91048	1.14482	2.25131
arahy.NN0MCR	71.5862	5.53312	3.6341	2.66368	105.78	6.86713	3.22778	1.80085
arahy.UD8U5Y	33.6093	11.3885	3.43693	3.57729	24.3171	7.86723	2.51026	2.81981
arahy.9S25LQ	37.4967	38.9114	70.2324	72.195	29.0402	94.3673	61.244	65.4488
arahy.38NIYD	9.86172	5.11269	2.27968	2.22465	9.79058	5.62038	1.84589	1.02395
arahy.C8INVP	3.76896	9.65552	4.86991	4.1504	4.59673	10.1278	6.67592	5.38293
arahy.R4JJE5	0	1.14039	0.114735	0.595968	0.0370455	0.379536	0.309323	0.432561
Novel01406	0.495348	0.113639	0.0654162	0.10526	2.42785	0.0186944	0	0.0809425
arahy.Z1T37B	3.299	6.11147	5.23586	5.0541	3.32671	7.91735	5.6885	4.14822
Novel02616	0.549722	2.84227	6.38597	5.23104	0.737557	5.25004	5.47193	3.9901
arahy.HB0B2V	0.532736	1.00006	1.10705	0.59113	0.554721	1.43604	0.980656	0.688419
arahy.BU7NMG	0.481115	31.673	9.40571	1.38064	5.38926	17.2886	7.9238	1.13647
arahy.QHK75C	14.6809	24.9545	9.92636	5.34286	26.038	21.2376	9.01312	3.71402
arahy.3IZ1KA	0.0768208	0.0751719	0.138541	0.0224819	0.0850858	0.407227	0	0.0347465
arahy.HNT14Y	0	0.568545	0.145508	0	0.053261	0.995389	0.192312	0
arahy.D9ZGX3	4.07387	11.921	4.36905	2.29364	4.25864	15.9831	4.26141	2.34153
arahy.C0K8ID	6.59148	0.512275	4.05883	4.92994	10.6607	1.38321	6.05876	7.18263
arahy.W17DX1	0	0.586033	0	0	0	0.198173	0	0
arahy.07SDIU	0.103303	0.322696	0.267899	0.0758707	0.0951345	0.292519	0.579641	0.331192
arahy.U1RN9D	16.9131	21.4683	11.8311	10.3425	16.0084	19.6637	11.7441	10.4423
arahy.RA398F	0.0130563	12.3421	1.60475	1.2768	1.28705	7.35988	2.76928	0.947145
Novel01264	12.1153	16.7244	13.5373	10.9293	11.3039	17.5543	12.1528	9.02814
arahy.T87YGJ	0.424257	7.71368	4.15426	2.74211	0.581092	7.59328	3.85023	3.82582
arahy.HIV449	0.0943005	0.921396	0.608538	0.0648631	0.0499886	1.21535	0.496695	0.0927477
arahy.K5EF2U	0.0850169	0.150484	0.818297	0.111122	1.62978	0.0662671	0.772451	0.488958
arahy.R4GM9V	1.1794	0.591962	0.0368853	0.10266	0.871059	0.475665	0.0403157	0.0733966
arahy.I1QH9V	0.321366	1.35608	0.906765	0.819344	1.86554	1.4344	0.936655	0.367499
arahy.7D9MEB	43.2143	68.7075	32.3776	19.7955	45.1901	72.6077	25.2049	19.3758
arahy.7V0FWY	0	0.537525	0.560215	0.437655	0	0.301608	0.558554	0.520105
arahy.V4CI2Q	0.58209	16.7016	0.166315	0.119647	1.29375	6.56804	1.23856	0.224785
arahy.12V79R	3.65856	5.06918	2.51743	1.57098	5.94316	4.8686	2.19849	1.28409
arahy.R4PVYI	0	0	0.174126	0.0569874	0.154154	0.0456507	0	0
arahy.B3FCUF	0.168329	0.363726	0.05472	0.152298	0.505473	0.905842	0	0
arahy.C871DQ	0.36196	4.55845	0.678408	0.944831	0.274122	2.16253	1.21643	0.995897
arahy.339BKI	20.4499	22.5931	16.5065	14.04	25.8781	25.827	18.4327	13.8485
arahy.1NQ2CM	0.395911	1.72941	7.97212	3.85127	0.133659	2.61608	10.0797	5.57583
arahy.T1QA7S	1.28906	0.763528	0.275599	0.253452	1.46823	0.487964	0.234498	0.33704
arahy.2P3Z86	0.0368836	0	0	0.122037	0	0	0.022997	0.0763824
arahy.T6B6L0	1.04224	3.70579	2.65552	2.68558	0.980818	5.16161	2.10922	2.08064
arahy.94DDXG	10.0558	2.84931	0.522489	0.0877685	10.9737	1.32196	0.16957	0.0578883
arahy.FBLS0X	0.58318	0.401396	6.14946	1.49936	5.34919	2.95099	0.96564	3.13287
arahy.EZLY4J	2.79335	0	0.559627	0.0495064	0.178734	0.0322399	0	1.30074
arahy.BG5WH1	13.4703	15.2452	4.2252	2.17542	0.691261	0.347546	0.0231437	0
arahy.XR8H09	4.31089	0.740604	0.630618	0.405335	4.34794	1.41684	0.697942	0.359166
arahy.46SNUH	11.1344	6.82293	6.52372	5.9583	11.1806	8.4852	5.26491	5.76877
arahy.D7XUPH	4.47899	6.98431	4.92901	3.51653	4.50642	6.64105	3.97376	3.25938
arahy.8QZ4J7	8.00887	6.88737	9.59939	5.98298	5.66315	6.33467	9.08775	9.16449
arahy.60XZVP	6.95271	7.42971	4.71577	4.89936	5.45647	6.76999	4.01187	3.99303
arahy.G6BTL7	2.69195	7.11822	4.58306	4.08071	2.44848	7.40376	5.40014	4.07365
arahy.KEPJ0C	0	0.260088	0	0.106851	0	0.464336	0.181421	0.165142
arahy.K7D9EI	1.76583	0.237042	0.331756	0.0754229	1.46973	0.598669	0.183711	0
arahy.KE1U92	1.36537	9.37474	5.99749	6.58882	0.781901	7.18299	3.84824	7.59583
arahy.4AG4F3	24.9789	9.62855	44.8385	16.5073	17.8579	11.1615	33.8079	0
arahy.47CT68	8.5176	32.5544	16.3114	8.42927	7.74035	38.1807	20.5235	7.01017
arahy.4WKV82	1.64047	6.32931	4.25994	1.80052	2.15212	8.79028	3.88272	1.46515
arahy.CI62AJ	22.8235	22.6291	19.4814	18.3393	26.3151	27.5153	23.4429	20.5776
arahy.57RV2P	0	0	1.3957	4.06406	0.0615225	0	0.870785	3.88137
arahy.S1GY7D	12.1648	36.4568	16.2941	17.8212	6.4703	16.8831	9.01491	4.87141
Novel00167	0.231274	0.525863	0.358743	0.789723	0.0895761	0.360172	0.457548	0.219216
arahy.ZH58RF	1.12439	1.00249	7.11772	2.04943	1.25988	0.973605	7.88936	2.96786
arahy.Q6EFFR	2.09183	3.34545	1.32428	1.3933	1.73868	2.29875	2.02506	0.933155
Novel03502	14.494	24.3084	24.5654	19.3496	28.1485	64.9893	63.7632	44.6656
Novel00760	3.571	12.6494	10.7209	7.15284	4.48827	11.7818	7.4356	4.66497
arahy.68ANLM	10.0897	7.42405	3.07015	2.29986	9.96675	6.95954	2.70989	1.61111
arahy.LKBY4F	11.9135	0	0	0	13.9266	0.111335	0	0
Novel00033	0.175408	0.64519	0.613045	0.518177	0.115446	0.510067	0.384341	0.405938
arahy.F5ML4Q	3.23244	2.53471	0.939084	1.58188	6.05821	1.93305	1.56197	1.39755
arahy.KUY2JB	0.0421004	0.120855	0.206742	0.299297	0	0.244092	0.441795	0.435011
arahy.0Z9K9L	2.34639	7.9695	5.66025	3.4667	2.21829	8.70929	4.10715	2.07673
arahy.QU6Z4C	0.365185	0.17534	0	0.167371	0.0777672	0.620636	0.0611531	0
arahy.IET74Z	0	1.33286	0.336341	0.286153	0	11.7746	2.41882	0.188734
arahy.UQH6TX	0.237853	0.42679	0.0564258	0.209295	0.149636	0.131122	0.0418023	0
arahy.32SWZY	0.0530492	0.445608	0.0325104	0.056226	0	0.303943	0	0.0646913
arahy.ANY8RS	7.94997	14.3015	27.2024	20.1969	7.34796	14.5393	31.2715	23.8948
arahy.FW1LZ6	17.587	32.8467	20.0198	13.7194	16.5621	35.9541	18.8031	12.366
arahy.IZH9YM	0	0	0	0.112	0	0	0	0
arahy.MC0I99	11.5485	27.957	18.6079	13.8235	12.4627	30.2452	17.6852	10.6771
arahy.XS9HJ1	2.4786	3.94795	1.09142	1.3475	0.157762	0.067003	0.028483	0
arahy.3211GC	3.31553	2.25802	0.674731	1.65519	2.70064	2.17698	0.920509	1.40349
arahy.374HIW	38.2233	13.95	4.21894	8.46465	21.8048	16.0597	6.42727	10.9637
arahy.FQX7TC	21.9616	1.18956	2.63487	1.02907	18.4387	5.84766	4.0119	3.63605
arahy.4T5ENZ	32.6918	0.812388	0.885533	1.41653	28.1029	0.874604	0.664793	0.667687
arahy.UI7C31	0.054453	1.77298	0.494913	0.220248	1.8653	3.67837	3.72577	2.05721
arahy.T3JG42	3.161	5.01389	4.36001	4.92921	3.1276	4.33426	4.9134	4.37829
arahy.C0A8IS	0.463108	0	0	0	0	0.0907625	0	0
Novel04365	1.56266	4.70425	1.23684	1.49744	0.154077	0.0598337	0.0184392	0
arahy.H7UR3I	0	0	0	0.0307387	0.272585	0.0481351	0.0194264	0.0353666
arahy.M88YV2	1.69319	8.42277	2.92596	1.46207	1.91151	6.57498	3.42834	1.99746
arahy.I533MD	1.00844	6.37998	3.26465	1.82668	1.6838	6.91246	3.78268	1.3175
arahy.PISI89	0.150492	0	0	0	0.149301	0	0	0
arahy.1A52WD	4.17353	9.636	2.02961	1.48734	3.6439	4.2821	1.98657	0.912962
arahy.AUF63Q	12.1153	11.5581	21.5806	15.1802	11.663	25.0435	16.4926	15.4832
arahy.BYTC22	0	0.323218	0.0744828	0	0	0.261025	0.104405	0
Novel02632	0.855883	2.22081	0.582091	0.594046	0.539915	1.24538	0.504117	0.316378
arahy.2B6J13	2.8566	6.5007	3.10192	2.11454	4.09362	4.42945	3.08555	1.68495
arahy.KTU7AY	2.7917	0.797074	1.93608	1.5523	2.07241	1.327	1.20367	0.886489
arahy.FXE6GW	1.26191	0	0.0118138	0	1.82477	0.0121843	0.0129125	0
arahy.YD5ENU	4.81901	16.7754	18.2401	16.001	4.45838	13.3229	18.0578	16.0081
arahy.LQ166S	6.2364	4.5789	3.01048	2.4635	7.17169	5.79769	3.16653	3.08099
arahy.KW7V4L	3.72629	7.43944	2.8946	1.79126	3.67624	5.46898	2.75357	2.7719
arahy.2V33ZP	2.66131	5.8267	2.85498	2.30755	1.42444	4.10048	1.0635	2.12394
Novel00454	3.99971	7.26042	4.36647	4.28364	5.02661	7.62943	3.93472	4.40021
arahy.0JVE27	2.88034	4.96927	3.93468	3.35833	4.26882	5.0977	6.13722	3.87631
arahy.45EZXP	5.8871	5.68427	6.2175	4.323	4.74308	6.84305	7.87616	5.45632
arahy.GIJ59W	0.233558	0	0	0	4.7424	0.0815191	0	0.157279
arahy.JB8DT0	0.0127185	0.460246	0.893221	0.928733	0.06702	0.816261	0.819401	1.57307
arahy.QQ4CTH	0.110427	196.563	98.5563	137.846	0.155924	111.222	83.8876	27.6478
arahy.204G50	0.119438	0.0381054	0.231931	0.0830686	0.0519412	0.0926209	0	0.0386298
arahy.A4E3FF	17.9963	18.3126	27.4759	35.2069	23.1324	54.8075	46.649	81.6922
arahy.S5VJ64	1.82259	0.21796	0.127936	0.48808	0.526311	1.13386	0.195065	0.0426174
arahy.D6VTE5	0.109802	0.0788007	0.430723	0.116378	0	0.377464	0.392226	0.133899
arahy.G66SVD	1.34888	0.47561	0.593847	0.307821	0.732249	1.05454	0.612824	0.15099
arahy.B67DTF	5.71632	42.1967	10.0264	16.5783	4.84206	22.9264	12.2455	12.0025
Novel00263	0	0.15323	0.527417	2.07835	0	0.208093	1.15998	1.57281
arahy.6D2NYF	0.421841	0.770897	0.205012	0.126952	0.0795927	0.71045	0.502923	0
arahy.86E75A	0.258318	1.63398	1.13765	1.04223	0.252303	1.84153	0.992827	1.16981
arahy.3Z7JIG	0.302615	13.886	2.90685	2.08977	0.792926	7.49692	3.33943	2.59995
arahy.MWJV02	0	0.0770237	0.204713	0.606326	0	0.201965	0.21472	1.01026
arahy.S5794H	6.58071	3.86161	5.21277	6.25581	7.49291	7.51103	4.66041	5.1668
arahy.1Y45Q7	1.59116	6.97281	5.1821	3.15298	3.71948	6.68	3.62693	2.38249
arahy.A25KZS	19.7582	12.2647	6.59626	5.78481	10.1277	11.4936	7.93211	4.66838
arahy.8E14VW	9.91622	8.9378	4.99345	5.30589	8.54676	10.3008	4.60688	3.62084
arahy.0GVW71	32.4367	8.56269	6.26944	5.41335	31.8271	9.33702	5.70097	4.92878
arahy.DP20MQ	0.146427	3.07875	1.65549	1.86956	0.18232	3.66551	2.70185	1.91083
arahy.D41UNS	7.63982	5.58395	5.54052	3.29928	1.12843	3.59776	1.28194	0.966277
arahy.QJ0ED0	0.0415916	0.184571	0.0461114	0	0.234913	0.148462	0.114517	0
arahy.5V4LVB	0.0350483	1.21906	0.501768	0.419837	0.0520128	0.609776	0.461681	0.4274
Novel00295	1.11378	4.85724	2.38418	2.7613	1.05849	4.53751	2.30859	1.92949
arahy.ZL000T	0.299968	0.393143	0.149809	0.0845066	0.0245087	0.124821	0.121677	0.181254
arahy.741MV0	0.0997612	0.400805	0.0591606	0.0366347	0.275618	0.587188	0.145129	0.103298
arahy.PAG1M8	7.1486	5.78384	10.9153	9.90494	3.51426	5.51146	5.67351	5.60159
arahy.72KEI0	0.49084	0	0	0	0.334953	0	0.172766	0
arahy.00B185	114.525	5.93419	14.2582	13.4576	309.024	2.5385	8.19421	9.86196
arahy.MK9XBA	0.07222	1.43317	0.164375	0.112514	0.265502	1.42689	0.197357	0.0922606
arahy.D1ZLL8	4.35302	9.66082	3.13082	4.16199	2.87827	4.03803	5.33273	4.64077
arahy.WFJ76T	7.13413	14.513	10.3613	4.43723	5.66867	11.6023	10.9612	4.10069
arahy.BV4TL7	30.0202	10.7668	9.85646	7.48804	19.1967	10.5899	9.35237	6.16515
arahy.TV59XI	0.0202318	3.48183	0.693171	0.430113	0.346242	2.23544	0.891288	0.567398
arahy.Q4S157	4.08082	11.9392	2.97985	1.69429	3.4114	6.96824	2.06883	1.16086
arahy.CSEA65	0.71826	0.193545	0.0683373	0	0.423459	0.365595	0.0359249	0
arahy.XZC4F6	4.16583	8.0753	4.61629	3.5315	6.8908	11.811	11.5092	9.03617
arahy.D57MTL	0.123627	0.628945	0.188404	0.368136	0	0.0682942	0.0798429	0
arahy.60BY7S	4.27325	7.51147	3.00956	2.76775	5.21675	6.91615	3.10285	3.28361
arahy.MR6WYG	27.7701	0.65556	1.25392	0.261743	32.9168	1.02985	0.435197	0.120112
arahy.MZSV4J	4.87116	4.6872	5.02047	6.32548	0.855913	0	0.13635	0
arahy.U4TTSR	1.17361	3.1502	5.90433	4.93139	1.7988	3.10913	4.90939	5.29323
arahy.UI3LS8	0	0.0623663	0.0532569	0	0.277015	0.0893064	0	0
arahy.7921HN	13.6087	24.1083	7.78683	4.90368	9.69464	21.8745	7.22965	5.47165
arahy.PU50YZ	0.342648	1.72386	2.1467	1.74646	1.72773	2.09862	3.43895	2.38562
arahy.XW0WPQ	2.20482	21.1115	16.0236	19.4286	2.00482	17.6933	12.8222	15.6359
arahy.84VILP	0.038531	1.94957	0.340832	0.349188	0.0235055	0.997613	0.488017	0.231779
arahy.X0RP1L	0.0504929	0.122458	0.0782532	0.106001	0.378728	0.12647	0.259095	0.0594731
arahy.ZG5C6W	2.20966	3.69625	2.40526	1.88378	1.84186	3.43042	3.18768	1.69481
arahy.P4FB71	0	0.327713	0.205012	0.212219	0.119389	0.253528	0.161662	0
Novel01033	0.154727	2.06185	39.4915	63.1932	0.0235975	0.368131	36.0534	36.1214
arahy.ZH7W5S	0.0571009	3.02985	1.71734	1.83709	0.18578	2.66491	1.81849	1.69424
arahy.HDCL4E	28.0416	36.1197	15.4168	10.7993	35.6782	38.2159	16.4024	10.2182
arahy.A0NJYH	1.42709	2.88608	1.63595	1.0006	1.95993	1.8729	2.39528	2.05766
arahy.Z186RR	7.36537	7.52873	6.03734	4.24548	5.95989	6.23756	8.35545	4.96926
arahy.SCNC0P	2.27801	3.82047	2.2298	3.2982	1.99441	2.84749	2.43671	2.41022
arahy.ZUG4EU	13.8615	6.224	3.85843	2.82852	14.2062	6.61036	2.84948	2.60434
arahy.3I642Y	21.6623	2.46671	11.06	21.9801	32.9608	3.22503	14.0504	28.1101
arahy.1N9QNC	4.47712	16.7353	13.7739	12.2315	4.38323	24.5087	14.3483	9.79433
arahy.F8T0MB	10.1389	7.47042	10.4657	5.52584	7.41191	9.54398	10.5496	5.95475
arahy.5RI6ER	15.0334	13.5088	13.9516	12.5979	11.0444	14.9292	16.3073	17.9747
arahy.SCR8HV	2.60947	2.53169	2.3001	1.90638	3.0959	2.39116	2.31978	2.2345
arahy.58WDF9	7.08806	132.927	55.4345	19.6555	7.83221	149.227	39.0528	8.70293
arahy.072AWD	0.0497381	0	0.0518286	0.0507821	0	0.10692	0.134907	0.0669874
arahy.C8BSPY	4.43071	4.75477	1.09723	0.800049	0.398964	2.42701	0.876045	0.225237
arahy.WT2SCQ	12.6186	18.5652	26.761	11.5786	15.9315	56.1293	20.181	6.91008
arahy.VH0R1T	25.6663	5.05148	5.54709	5.61406	24.8532	10.4691	4.47117	2.52777
arahy.KI5QM5	14.0943	29.5351	14.6624	8.7426	13.1262	25.4204	14.8892	8.50867
arahy.DIZ14G	3.04303	13.394	5.32212	4.79077	2.90658	12.9301	6.01618	4.20649
arahy.B4CUFV	0.178194	0.474553	114.318	316.575	0.123848	0.408458	201.2	228.51
arahy.GG5G0Y	0.679581	6.13638	2.37068	1.78722	0.603805	4.28263	3.01351	2.13328
arahy.ZUY26J	2.15038	6.55576	2.49388	1.81188	1.75562	5.49618	1.98542	1.61143
arahy.KTYY32	0.0693588	0.0461695	0	0	0.138061	0.0247046	0.0161024	0
arahy.U3J4NJ	52.3939	643.729	146.42	54.2497	66.4716	561.065	221.599	77.5386
Novel01906	0	0	0	0	0	1.45521	0.296627	0
arahy.590LKT	0.102853	0	0	0	0.102688	0	0	0
arahy.C4QWG2	0	0	0.0492209	0	0.292069	0.206346	0.251047	0.178687
arahy.A2IWKV	0.144266	6.64234	3.49457	0.560296	0.0989399	8.70608	1.89788	0.405415
arahy.PV9TPZ	0	0.164825	0.0145034	0.0373461	0.482361	0.257428	0.0158523	0
arahy.VTXV28	2.32703	5.86892	1.86467	1.42627	1.97379	4.24898	2.28579	1.73399
arahy.W86JC4	8.84035	65.8809	35.983	19.618	10.6615	47.28	47.8491	31.4932
arahy.VW4TEM	22.2823	9.13384	15.561	7.47718	31.6781	11.3059	13.1072	4.87964
arahy.FA5JII	0.109178	0.0748967	0.0676549	0.049127	0.0616005	0.039354	0	0.0692612
arahy.56CREW	5.61383	7.09281	4.47586	3.27582	5.1475	7.68689	5.42452	3.63412
arahy.X81CAV	2.02939	24.162	13.1503	9.50603	1.61511	17.6613	10.7139	8.77494
arahy.M8VE2Y	61.5504	141.738	38.9019	24.0201	52.8138	139.585	43.4258	16.2289
arahy.YUGK7S	0.313309	1.76202	1.99719	1.3124	0.38809	2.91962	1.76286	1.26799
arahy.P6PKMQ	0	5.57047	1.14563	0.468129	0.030693	4.62473	0.828616	0.219702
arahy.J6JJPP	33.2799	22.8089	18.9431	10.5423	34.0629	21.5301	18.3427	12.9489
arahy.4QW8I5	7.92847	5.52403	2.17951	1.68789	5.95883	4.7731	2.04663	0.732937
arahy.2VS3GS	8.25897	18.2748	10.8709	9.37444	7.10342	16.5492	10.5482	7.46469
arahy.70K1B3	0	0	0.100596	0	0.187949	0.846502	0.69631	0
arahy.ZIU9VW	28.7586	7.27574	4.83723	2.5684	29.1256	6.51114	4.11329	3.80805
arahy.GZ0G6J	83.5781	0.618328	14.3258	10.7279	94.4065	2.12976	10.165	8.19491
arahy.TPLS1U	0	1.22249	1.87019	0.286462	0.273869	2.81669	1.37222	0.717582
arahy.WPED2H	13.4972	6.49809	13.0606	6.99599	15.29	14.976	9.79507	7.00173
arahy.V9RCLW	0.048806	0.137192	0.0811646	0.1065	0.0148868	0.0344844	0.0201579	0
arahy.B5S4LJ	5.09522	7.31113	5.76261	5.54697	6.34613	6.24149	5.94976	5.92278
arahy.FR68PK	1.83069	18.705	8.57357	9.63178	2.6941	16.0442	12.5353	11.0296
arahy.CIMT38	10.1861	15.1195	28.7315	10.708	26.5973	84.4924	82.4655	44.0819
arahy.VN8AVF	0.313693	1.32282	6.58439	6.09804	0.754831	1.29656	6.87234	8.85754
arahy.AN92IF	0	0.137557	0.079185	0.0403686	0	0.194068	0	0
arahy.B6YHW5	0.790566	1.56955	0.775294	0.577603	0.639813	0.968039	0.548643	0.620419
Novel04035	1.33317	2.28102	1.65935	1.65045	1.3968	1.78806	1.95302	0.980417
arahy.WHVZ2S	1.13565	0.0848182	0.108644	0.0541674	0.421656	0.0373506	0.145127	0
arahy.2M3JSP	0	1.07675	0.104795	0	0.0962894	1.25101	0	0
arahy.ZCN7QC	0.0745716	26.1275	11.6631	9.88553	0.453778	26.5205	12.8732	10.0658
Novel03422	0.644071	2.91852	1.08528	2.72222	0.334531	0.851919	0.303458	0.0720622
arahy.230XUM	14.603	3.68911	3.2142	3.19527	15.6689	3.99554	3.63449	2.48613
arahy.KF0JQ1	24.3879	28.4292	12.51	9.69548	20.9886	27.3719	10.8898	9.14659
arahy.AKSW6P	5.58725	5.31926	6.55143	4.15002	4.48256	5.66099	7.78539	6.0906
arahy.D8CMXH	26.3322	57.1409	38.722	30.0031	24.2924	43.7949	36.8513	29.8506
arahy.RHC2N4	0.0169809	0.122212	0.0624391	0	0.0278431	0.198461	0.0303289	0
arahy.PFQ45M	94.7822	10.9738	5.4212	3.06111	57.9258	12.6508	7.28267	3.63822
arahy.X3M77N	1.05197	2.68208	0.784943	0.881608	0.351384	1.86516	1.2491	0.550539
arahy.LXS6II	4.62499	3.71512	2.21088	1.39244	3.74358	3.02103	2.3825	1.6457
arahy.6H51DS	32.3247	4.94417	62.2655	32.7209	28.401	15.2335	79.2585	56.3166
arahy.7W5PUW	1.57266	9.1063	4.40225	3.81815	1.60087	5.61314	5.48848	4.11581
arahy.YFKH51	3.44951	1.41342	5.61196	3.25782	1.60482	1.59029	2.94051	1.72235
arahy.86IGSK	2.96256	5.53885	8.3822	4.16163	2.69104	5.62333	7.55675	2.84504
arahy.0PDV4E	29.6226	47.4744	31.3296	26.9955	26.7737	38.4891	26.993	24.9282
Novel02254	0	0.419108	0.760601	1.27153	0	0.0848098	0.898739	0.779826
arahy.DA0PX7	5.99935	1.39614	0.0878377	0.045233	4.77505	0.488148	0.102224	0.10815
arahy.S4MMCZ	12.8146	2.65505	3.05124	1.92708	16.5421	3.10855	2.24201	1.69249
arahy.XEDZ3Q	11.8236	20.8062	20.5384	16.4969	10.9078	20.8348	18.6327	17.7813
arahy.KY95SZ	0.208407	0	0.208607	0.174451	0.109372	0	0	0
Novel04368	5.02925	5.89331	3.27294	1.995	7.09523	4.78195	3.3675	2.91972
arahy.MVX6LJ	36.1444	25.6193	30.3135	21.3093	35.8419	26.9772	34.5485	24.4201
arahy.CQVN9M	0.450978	4.68128	1.17309	2.42446	0.500338	3.24558	1.26201	1.04703
arahy.NHX0KA	0.0711192	0	0	0	1.25009	0	0	0
arahy.P70IT9	10.1695	8.553	0.990606	0.559093	7.08564	6.60478	2.3965	0.781728
arahy.L7YJN9	1.10068	5.7448	1.62525	1.15001	1.39272	5.68379	1.82446	1.20314
Novel02221	0	0.639625	0	0.0944639	0	0.250054	0.0596997	0
arahy.L76SLB	17.8402	11.1528	2.37323	2.53827	16.9427	9.33201	3.14412	2.3409
arahy.Y18RHQ	38.5914	0.209233	0.0166911	0.046455	27.2005	0.137233	0.0547303	0
Novel02992	0.198967	9.48856	1.37578	4.09414	0.282002	3.6286	1.8681	1.77425
arahy.NDL7Z2	105.894	43.4929	30.9291	19.973	78.5573	44.4198	26.6713	20.0564
arahy.PM8GQZ	0.850996	0.673913	0.634188	0.252566	0.526226	0.597916	0.517653	0.20703
arahy.0QV8DZ	2.17502	0.934449	0.879298	0.492855	2.11927	0.82491	0.754496	0.480127
arahy.KPZY4F	0.0918121	0	0	0	0.105124	0	0	0
arahy.3CB71M	0	0.186567	0.0633661	0	0.0255743	0.242618	0	0
arahy.SLD8K7	7.53278	15.5985	12.8152	6.89956	9.50874	15.3222	9.59808	8.03823
arahy.4UTI2R	5.47446	9.12468	2.58908	0.665404	3.46561	8.57392	2.53474	1.0057
arahy.MK7H36	10.7333	94.7393	36.324	59.9556	7.20995	49.9585	47.5511	44.8049
arahy.MG32Q7	0	0.353409	0.150894	0.419972	0	1.13866	0	0.300259
arahy.VWTL5B	13.1306	6.34415	16.7141	12.9317	29.2336	8.51226	17.6299	19.2043
arahy.VN6XRW	1.34692	7.38883	14.237	5.41113	2.57102	12.8859	11.8514	5.14677
arahy.XAZK7H	6.7787	7.94431	5.51188	3.79386	5.60607	6.75875	6.92079	5.85771
arahy.BX9JZJ	1.05481	2.5036	1.85392	1.69138	1.48122	3.86391	1.62285	1.77433
arahy.VGS9ID	0	0	0	0	0	0.310019	0.959206	0
arahy.EYQ1XG	2.11725	2.78085	2.81875	3.61325	2.66673	3.24613	2.46547	3.95661
arahy.YT9B61	0.18512	3.7093	1.53776	1.67982	0.431235	3.97123	1.49203	1.79417
arahy.BT8YZU	12.6838	10.0934	6.79746	4.31137	17.0426	11.2311	5.06507	4.25465
Novel03055	0	10.9235	12.4149	24.3485	0	8.77798	10.1017	20.55
arahy.YW8AP0	1.15968	1.99013	2.432	2.39098	1.39931	2.98758	1.99174	1.86502
arahy.GZ47R7	0.188201	0.485976	0.54953	0.350406	0.268247	0.947505	0.465708	0.256798
arahy.LGEW2E	0.178076	0.157601	0.269163	0.434053	1.47847	0.22568	0	0
arahy.Z231WD	2.27711	4.4261	5.4477	3.47494	2.5077	5.66121	5.2996	3.73689
arahy.KR5G4U	5.0812	3.15868	3.33209	2.86072	5.88903	2.95966	4.02621	2.90067
arahy.Y81K3F	0	0.0281703	0	0.0359807	0	0.152804	0.0262929	0
Novel01146	0.136918	1.41773	0.330918	0.118301	0.107871	0.648057	0.273731	0.229165
arahy.QZ4B98	0.350338	0	0	0	0.0957008	0	0.259173	0
arahy.IDJ1ZL	0.226657	1.04448	0.635305	0.33088	0.23902	1.36435	0.931041	1.00755
arahy.G0DR35	0	0.513331	0	0	0	0.236038	0.0358067	0
arahy.28UEMM	1.07207	1.27471	0.836844	0.326418	0.763755	1.41535	0.259972	0.810093
arahy.7L21K7	0.179101	0.277946	0.282195	0.290492	0.160928	1.53254	1.33137	0.381803
arahy.G9QUK2	1.94941	6.05604	2.95048	2.3156	2.01317	5.36471	2.95244	2.39285
arahy.D04CBC	7.77283	2.35343	2.53209	1.8829	6.44465	3.73994	2.59434	1.663
arahy.VU0ITX	36.0479	0.21588	0.430654	0.23502	52.0938	0.777686	0.301798	0.105067
arahy.J2YHHP	93.3773	28.4807	14.8725	5.71528	68.9984	28.9429	11.0538	5.56051
arahy.L7CY27	42.2716	18.759	6.04345	4.00434	27.8734	13.9244	5.90351	3.25218
arahy.RS0TAB	0.9823	5.57303	1.3372	1.2859	0.859768	4.64511	2.25828	1.57611
Novel01347	3.68746	3.89932	9.73667	8.25414	5.8636	10.9049	5.95499	5.15988
arahy.7Z9IPQ	7.31315	11.8754	7.27614	6.56653	7.01115	10.23	8.18187	6.88323
arahy.F664T8	0.114074	0.158429	0.267833	0.0252048	0.0136021	0.248573	0.0552551	0
arahy.53MGCZ	0	0	0	0	0	0.414457	0	0
arahy.91DTPA	3.27347	22.0706	10.6121	8.60445	4.45793	17.3443	8.57299	8.51064
arahy.LM62V2	10.8212	6.59657	8.82267	4.91422	9.4791	9.85959	7.71951	5.53674
arahy.V06H0G	2.01613	70.2809	15.2331	17.0514	5.44166	57.1435	21.4764	19.3468
arahy.RP1DZ8	12.5101	6.23119	5.67869	6.44776	8.49913	9.54123	5.69893	5.67125
arahy.DD5QG4	2.57947	1.52223	5.86605	3.14877	2.67146	1.3528	1.70357	1.00858
arahy.1V3YN0	0.0568001	0.0502694	0	0	0.213649	0.16819	0.0469192	0
arahy.2HQS5R	18.1444	20.766	17.5046	14.4756	16.9069	20.8495	19.659	15.4723
arahy.CP6VIJ	18.9635	3.4077	2.88128	2.64554	12.8055	3.48644	2.85585	3.50622
arahy.2BY1CI	0.291592	1.19951	1.41959	0.68238	0.361038	1.97733	1.42715	0.503769
arahy.G5US7K	1.88024	2.34731	2.05544	1.50561	1.36065	2.53526	2.70418	1.28985
arahy.L6ZHES	1.69938	149.91	50.6338	12.935	2.99768	246.378	60.8701	13.1488
arahy.WFM3MS	0.1004	0	0	0.0274564	0.0516415	0	0	0
arahy.72UZ71	12.3151	12.9151	14.1565	6.61787	16.7797	15.8088	16.7367	9.76774
arahy.JMN63H	6.43651	16.7753	6.93085	5.56098	9.26757	13.3988	6.29735	5.53771
arahy.8JC9PH	5.4366	7.30354	4.89109	6.4444	5.39616	7.70757	5.5731	5.80472
arahy.253MV8	1.33927	1.79046	1.62334	1.49632	2.75451	1.84464	2.1123	1.54158
arahy.PU5J2F	3.89761	6.6239	3.34675	2.69276	3.54148	5.1912	3.80966	2.62576
arahy.3JNY9C	0.432881	1.81638	1.04671	0.563593	0.590678	2.0777	0.892182	0.855568
arahy.N1UDB5	23.7058	1.71096	0.801006	1.05654	47.1641	0.187644	0	0.222664
arahy.79W14P	4.48761	8.69376	2.1171	1.56336	4.14307	7.42202	2.3485	1.79826
arahy.5KH3HF	16.3345	36.4571	31.4992	23.87	12.5702	33.5229	28.5786	21.1198
Novel01393	0	1.10285	0.0351909	0	0	1.30932	0.153855	0
arahy.L5CA9S	0.295315	1.7259	0.134923	0.0292743	0.259994	1.65056	0.555002	0.0452445
arahy.AR5SA1	28	6.19078	5.94923	9.67325	26.8705	9.68128	5.10157	4.88339
arahy.ULZ0R3	0	0	0.563314	1.08851	0	0.0991874	0.864246	1.69648
arahy.KMV1WU	0	0	0.86382	1.4598	0.0780473	0.324277	0	0
Novel02580	2.51598	3.27446	5.67354	7.98344	3.25938	6.67699	3.22932	2.16194
Novel02294	1.41979	16.706	6.96534	11.313	1.62605	19.4807	8.72588	7.44253
arahy.Y27V4H	3.19175	4.81007	2.72805	3.52631	3.50198	5.97629	3.42322	3.66249
arahy.4GF8V7	315.914	0.835504	0.204715	0.0684796	162.002	1.18591	0.231839	0.0894112
arahy.H9ZQVQ	0.106745	0.0406359	0.0347005	0	0	0.0357889	0	0
Novel00366	0.308813	2.39557	1.41233	2.40561	0.303076	1.33224	2.49033	2.77855
arahy.EJKA3Q	0.1704	0	1.30819	1.90596	0	0.215952	1.12606	2.00505
arahy.CLZM2Q	7.98896	13.5901	11.9017	9.76665	8.38897	14.3111	12.1255	9.53551
arahy.WCN1YP	2.65481	3.80433	2.27588	2.35107	2.94094	3.92773	2.44458	2.40027
Novel03412	0.141421	0.712497	2.36637	0	0.0995525	0	0	0
Novel00685	0.115763	0.300289	0.489627	0.265494	0.164353	0.692679	0.689528	0.707085
arahy.C485DN	0.800891	1.88809	0.612613	0.537494	0.571137	1.46782	0.605272	0.107507
arahy.ZSC88Q	1.52396	1.61116	1.01772	1.51584	1.69436	1.04238	1.06086	2.46523
arahy.L0R0IL	601.151	30.7232	8.01254	7.54586	722.836	29.0798	11.2617	3.15712
Novel03558	9.45344	15.3051	7.94446	9.24136	7.79913	10.5353	9.88806	8.75844
arahy.WJU1NN	2.39952	4.6818	3.9926	1.99587	3.12196	8.15511	2.15385	0.747934
arahy.C8L4QR	0.134404	0.196912	0.224888	0.108668	0	0.260858	0.240368	0
Novel01912	0.0333007	0.383736	1.27759	1.563	0.15557	0.411282	1.18962	0.898348
arahy.YDW0SS	12.1888	17.455	11.0656	11.947	9.61018	13.5568	12.748	8.51201
arahy.8578L4	1.08058	7.1783	4.60429	4.49866	0.964651	6.58421	6.1462	5.01395
arahy.NZL2UA	94.7018	2.2021	0.935095	0.296426	79.7827	1.47721	0.542462	0.128727
arahy.TJZR4S	0.231694	0.0359769	0.030722	0	0.0461496	0	0	0
arahy.WU4ITJ	12.3871	5.59779	2.61995	3.95068	8.54191	3.84127	2.63948	2.2952
arahy.1EQZ0A	0	0	0	0	0.324439	0	0	0
arahy.2XHF5V	2.99163	2.97915	0.739675	0.695226	2.39976	1.94851	0.937776	0.449287
arahy.XTT2YE	0.0322009	0.301078	0.334689	0.0977751	0.0752163	0.685302	0.280384	0.150175
Novel04183	0.666517	9.37241	3.7471	2.66779	0.889584	8.18299	3.29522	2.67124
arahy.ZNMT52	0	63.3922	0	0	0.0795549	29.5581	3.94121	0
arahy.L3RJRN	78.5141	44.2176	52.392	44.8083	75.628	103.621	42.0519	32.766
arahy.026BRM	1.79748	2.2999	1.26755	0.606698	2.04064	2.59116	0.604427	0.307143
arahy.Q5MJGN	0	1.18305	1.68187	0.667021	0.0785557	1.73823	0.673629	0.934257
arahy.5WK6RP	1.11494	9.3962	1.60288	1.25857	2.03678	6.95221	3.05862	1.31707
arahy.N40WIR	0	0.124069	0	0	0	0.222078	0.231601	0
arahy.YY1YYX	0	0.13178	0.0281329	0.132813	0.0227087	0.173684	0.0614986	0
arahy.TSB66L	1.4645	22.5011	17.8802	10.6713	2.24452	17.9348	18.4524	10.6502
arahy.A6Q8V1	20.7741	2.70486	0.630073	0.302764	18.5499	1.46564	0.635686	0.402994
Novel02845	8.56427	3.00632	4.42778	3.3955	5.79165	5.77767	6.79832	4.35159
arahy.DCC0MI	30.6508	6.18898	2.35932	1.81513	22.1139	4.04117	2.72744	1.12178
arahy.0Q8MRK	0.232842	5.97741	0.119812	0.426189	0.220454	0.645857	0.340716	0.343248
arahy.B6KHKZ	25.6724	16.049	7.84046	6.11645	18.4336	17.232	8.71239	5.89707
arahy.R571P7	2.04288	0	0	0	3.17207	0	0	0
Novel01904	62.8977	20.5475	7.53135	5.09479	42.9858	18.9847	9.3523	5.38656
arahy.97EUYU	0.534933	3.53584	1.7319	1.7059	0.385757	3.23339	1.74324	1.81662
arahy.YL00Q2	5.0683	0.283801	1.21955	0.829667	2.55276	0.347097	0.7305	0.90701
arahy.BA35D7	5.1001	8.26905	3.749	2.56938	4.09219	6.90187	3.81899	3.08433
arahy.UQ9HUL	0	0.278785	0	0	0	0	0.346909	0
arahy.T0ZIH1	2.93967	4.81947	12.3658	10.1601	6.34946	7.72976	12.3538	11.5367
arahy.GBY9UZ	11.2945	29.8107	16.741	24.4446	6.93658	18.9378	23.5082	24.8988
arahy.6P4JRH	2.31782	1.45626	0.336604	0.0810473	1.01675	1.50928	0.647158	0.163659
arahy.G0ZX4A	0.107621	65.7637	0	0	0.0532375	84.212	8.41017	0
arahy.G7BP07	0.962512	0	0	0	0.434223	0	0.0530988	0
arahy.B92Q45	0.124561	1.96922	1.68645	1.41982	0.122277	1.84883	1.40071	0.862624
arahy.TICU69	0.334278	1.92918	0.131127	0.0864794	0.402226	3.08693	0.453811	0.0665009
arahy.D3Z63J	5.21863	22.0912	11.5855	18.4285	3.57259	15.196	15.2388	17.43
arahy.BMML80	2.16025	2.77455	2.53109	2.1463	5.48663	2.44794	2.85987	2.31562
arahy.Z0KP5S	1.11091	0	0	0	6.59156	0.0849007	0.0248144	0
arahy.DT15MC	56.4186	37.3021	16.9143	11.9528	43.5525	44.2417	16.5962	10.9742
arahy.N3Q478	0.0494025	0.0170921	0	0.0187916	0.173215	0	0.015953	0
arahy.Y7RZ17	4.75313	26.442	8.91739	8.9595	4.09548	18.3524	9.81412	8.69255
Novel03991	0.56091	6.94052	4.79821	6.97524	0.511903	7.75451	4.61585	4.51294
arahy.EV3R4X	2.60569	6.59424	5.31161	3.83693	3.3158	8.72103	5.71749	2.82055
arahy.4YDI7F	0.135989	0.0975942	0	0	0.0336354	0	0	0
arahy.240DSL	8.84181	11.2333	8.99618	4.86714	4.52166	18.6044	5.85616	3.495
arahy.4J6RBL	0	5.36002	2.14473	0.209624	0.169281	5.89961	0.898629	0.0691294
arahy.N21GUB	0.185084	0.41634	0.255499	0	0.420378	1.77319	0.387927	0
Novel04650	0.0746588	2.32737	0	0	0.201054	0.641662	0.233362	0
arahy.S8GTV1	39.326	27.5836	14.8607	9.8364	34.7817	27.9117	14.3914	8.75422
arahy.2QB43J	0.621401	0.173445	0.0227558	0.0297499	1.66438	0.18528	0.010082	0
arahy.Z569TI	4.17297	12.672	9.8963	5.14978	3.08322	11.8988	9.75264	6.23303
arahy.XSR2AY	2.0335	2.97155	2.59595	1.44962	4.16445	5.9909	4.22741	2.79789
arahy.Y23KDA	6.12401	5.83092	9.09852	6.39137	7.74302	11.9872	10.1515	8.40471
arahy.IV4I8P	1.52558	6.31564	2.26219	2.12744	1.46449	5.21909	2.95559	1.84663
arahy.VNN59Q	0	0.770631	0.122951	0.212641	0.0992453	0.253615	1.11982	0.44635
arahy.Z4FKUN	9.04875	13.3845	5.38411	2.73806	9.3416	15.0211	8.34528	3.3586
arahy.Q83G00	0.121436	4.93609	2.48405	2.01148	0.418877	4.55676	2.12956	1.82263
arahy.C986L9	54.7666	14.8477	34.3146	26.5516	69.5555	38.7574	28.1423	21.4435
arahy.7ADW8G	0	0.216328	0.0637114	0	0	0.586396	0.212107	0
arahy.FN2JF5	0.202744	0.265363	0.121281	0.0967571	0.0986687	0.271948	0.180158	0.17905
arahy.I46CY9	0	0.126116	0	0	0	0.0331336	0.0351137	0
arahy.5YY8MK	11.8511	22.256	18.9288	11.0909	13.2863	39.6139	20.933	12.3991
arahy.405FF9	2.20312	3.07937	2.34152	1.52439	2.45786	4.01775	2.50145	1.90682
arahy.U5WKYJ	7.28389	0.446131	0.301798	0.0761421	7.89114	0.670379	0.414914	0.0354087
arahy.AEZ3SC	0.0577591	3.59634	2.77852	2.2183	0.228478	3.2994	2.72335	2.34978
arahy.V37TM0	0	0.255824	0	0	0	0	0.0446117	0
arahy.PZ4M2K	0.579395	6.32455	5.57247	3.98136	0.671952	5.44967	5.31818	4.86155
arahy.S9N27B	1.06729	1.22954	1.08418	0.491523	0.755066	1.3333	1.63271	1.02034
arahy.VUVF3M	0	0	0	0	0	0	0.145137	0
arahy.37ETDL	0.0342318	5.50189	1.13438	0.414471	0.0945749	2.69292	1.32326	0.32242
arahy.QKB3E6	18.9567	4.25752	1.66888	1.4454	20.8074	4.09069	2.7155	1.91572
arahy.PBP7IS	18.0527	8.48825	5.53226	4.73157	13.9322	9.13105	4.65984	3.99527
arahy.EDF5ZB	14.6797	6.40523	4.35701	3.89148	8.20696	5.6212	4.65101	3.73557
arahy.HK1F5C	1.25793	41.9996	31.0585	33.0104	6.12398	45.1967	33.2132	25.2451
arahy.GG01I1	0.0164858	0.170773	0.432282	0.324536	0.010057	0.132567	0.458447	0.193983
arahy.G2HH9X	1.20813	1.94659	1.26289	0.938753	1.0657	2.06594	1.20362	0.935547
arahy.KQQ5DM	29.7462	26.8732	40.3501	32.2237	45.9745	22.5987	48.1864	36.9628
arahy.QTG4QH	0.193461	0	0	0	0	0.122279	0	0
arahy.845W93	79.2072	29.948	8.78879	9.34713	58.2495	21.3235	9.36727	7.7457
arahy.K60EBP	30.1749	35.0118	23.7559	17.722	37.2641	56.7103	20.84	14.7288
arahy.QF5GL7	0.792145	1.95548	0.426093	0.20481	0.859125	2.49693	0.937317	0.142766
arahy.45U3L8	0	6.75534	0	0	0	1.78904	0.148886	0
arahy.XJC9R2	1.16172	0	0.121521	0	0.652819	0.230289	0	0
arahy.KBN283	0	0.263064	0.259607	0	0	0.062783	0	0
arahy.0US4Y3	0	7.17603	3.7675	4.27408	0.0739585	7.07081	4.45864	4.78111
arahy.28WAQV	0.902685	0.449861	12.7388	18.363	0.45444	1.40825	11.3212	15.7727
arahy.8L80X9	2.33745	8.55279	6.21589	6.47395	2.25884	5.9869	4.2	4.93525
arahy.KSLX5N	0.261054	0.103813	0.0468538	0	0.0126067	0.185071	0	0
arahy.9HI94T	1.59941	2.36157	4.77025	2.99308	1.85178	5.44495	5.52778	4.63405
Novel03701	1.95814	8.83659	18.322	74.5743	0	0.299197	0.932429	0.861002
arahy.KKU7AB	0.507906	4.98193	1.40369	1.11714	0.347106	2.91746	1.2037	1.50266
Novel00414	0	0	0.0265103	0	0.37088	2.59294	2.1248	0.868991
arahy.WV308C	0.213159	0.562114	0.102413	0	0.0515312	0.344926	0.120166	0
arahy.5K0G3N	4.15975	13.1718	8.14114	3.22371	3.51567	11.2183	5.97109	3.18774
arahy.VH4LBD	6.156	7.09827	5.25542	3.87031	7.49811	7.28039	3.99118	3.6878
arahy.US8HBC	0.207899	0.387704	0.194009	0.268729	1.60711	0.106538	0.0941088	0.163808
arahy.03CHBD	9.42967	9.38348	6.11079	4.11167	6.11096	15.8862	5.39035	2.49404
arahy.5T46L6	0	0.404463	0	0	0	0	0	0
arahy.BB0AZK	0.137549	0.0281476	0.0352606	0	0.083712	0	0.0525434	0
arahy.LZCT1H	4.65657	11.4048	6.01193	8.39589	4.49659	7.96533	5.08927	5.51484
arahy.BPE0YX	0	0.133378	0	0.0547955	0	0.0713688	0	0.0846884
arahy.14BCP7	7.55489	8.85288	6.1746	6.11915	6.08274	8.76228	5.66373	5.44799
arahy.24IXRB	34.9801	3.22812	2.73009	3.58982	42.3254	1.86233	2.75357	2.7414
arahy.ZR4GPW	0.0527105	0.390961	0	0	0	0	0	0
arahy.E809L9	0.743101	4.12052	1.97971	2.11716	0.926186	4.52582	2.87861	2.3807
arahy.MM015B	0.193295	0.431207	0	0	0.602222	0.0736778	0.0960463	0.0874284
arahy.GN4RBX	0	0.23964	0.148483	0	2.90571	8.6068	4.55845	4.53114
arahy.WWI603	1.35878	0.347283	0.295885	0.144299	0.854067	0.233503	0.583999	0.232955
arahy.IZ4F9K	1.22289	1.91977	1.67539	1.25968	0.525206	1.54582	1.28737	1.07139
arahy.E9M6IW	0.36722	35.5482	17.955	9.30214	3.13735	30.4192	20.4375	11.6088
arahy.45Y85Q	0	0	0.279814	0	0	0	0	0
arahy.59XDTJ	0.0241201	5.16038	2.05742	2.12788	0.431342	4.31633	2.62986	2.58671
arahy.VI9E07	1.42951	3.47151	2.32103	1.48175	1.06785	3.71317	3.05452	2.4157
arahy.HA7324	0.0509977	27.4172	0.0604855	0	0.0469651	7.66836	1.26126	0
arahy.GG9A7K	7.60458	26.668	10.4176	13.1121	7.2562	27.0606	11.3812	8.44547
arahy.96UBDB	36.2334	9.2805	2.77594	1.34376	30.1529	6.56888	2.69861	1.08271
arahy.BSNJ2C	0.821222	0.0349177	0.12163	0.378461	0.57048	0.323487	0.217263	0.275826
arahy.BJ8F99	0.278852	0.197921	0	0	0.165369	0.35239	0.020461	0.111751
arahy.7C5766	4.48163	2.3	2.90761	2.56835	4.81623	2.55385	2.04851	2.40856
arahy.1GV9MA	3.36369	27.9515	13.0146	10.4967	3.30929	21.7162	10.6259	9.20438
arahy.U326PE	5.14163	10.5302	14.6281	8.35096	9.23887	12.6257	15.2567	7.55091
Novel04832	18.4078	12.4106	8.57901	2.9007	13.3178	13.0168	5.43418	1.50612
arahy.8QJJ59	0	0.0911133	0	0	0	0.726276	0.085041	0
arahy.XL5E6M	3.03498	12.1247	4.44266	4.87111	2.38598	8.88341	3.19953	5.11106
arahy.S1L982	0.260035	3.39277	1.35933	1.49326	0.34954	2.85639	1.25307	1.34669
Novel04882	1.08573	1.26322	1.04921	0.692286	0.0566117	0.144668	0	0.139557
arahy.WG9HC3	0.289033	0.722348	0.82283	2.19318	1.20074	1.62973	0.959657	1.10493
arahy.SM4VAG	11.193	7.91723	4.79836	3.92556	11.3483	8.69396	5.66344	3.8596
arahy.K4C16D	0.0675198	0.279431	0.996722	0	0.0205949	0.0213923	0	0
arahy.GYV5V7	181.825	91.3867	54.8375	25.5751	155.955	85.8809	37.8791	17.168
arahy.N5DCQN	5.4552	7.04978	3.43205	2.88605	3.75509	6.15946	4.12956	2.54946
arahy.RFF9M1	3.52889	5.47237	1.45368	0.550271	2.46028	4.39667	1.51154	0.455935
arahy.16ZACY	6.17659	14.3781	7.03171	6.22325	7.61012	9.96542	8.40466	5.26205
Novel04348	0	1.95183	0	0	0	1.37604	0.160302	0
arahy.A74HRV	29.9644	18.3965	9.52014	11.1749	34.1773	24.5592	20.1543	21.3454
arahy.0I35HW	0.0576608	0	0	0	4.16324	0.0182225	0.0193115	0
arahy.5N5SZU	0.808138	2.08256	1.13162	1.25041	2.04577	2.57637	2.12475	0.902465
arahy.I2K3PU	5.54737	10.4782	5.86345	4.47721	5.01978	11.788	4.79562	3.66615
arahy.HCI8A4	5.61046	1.12195	1.08494	0.792217	5.23547	1.31875	0.94963	0.888308
arahy.1JAQ89	0.113275	0	0.0889952	0.0921237	0.0172755	0.0479649	0	0
arahy.H355B7	0	2.98509	0.580265	0.626982	0.31857	2.6144	0.983161	0.744328
arahy.IM9F8N	0	0	0	0.102523	0	0	0	0
arahy.UPDR5R	0.613889	1.7171	1.05058	1.44783	1.45682	1.84015	1.23699	1.04259
Novel03952	0.771104	1.96809	0.688558	0.54652	0.804768	1.29728	0.518783	0.396281
arahy.U2ZRRJ	0.200234	3.07587	23.5127	4.7244	0.195557	9.76552	15.9835	4.22184
arahy.UM33GY	19.1279	0	0	0	33.0565	0	0.67044	0
arahy.Y6EKB2	0	0.178346	0.0569088	0.17024	0	0.0954302	0.0622014	0.113241
arahy.7G8F9G	0.964485	1.83965	0.765422	0.159325	1.10192	1.65579	0.88503	0.253484
Novel03406	10.3055	1.30926	1.31073	0.839879	10.8213	1.86959	1.67808	2.28301
arahy.Q9T26T	14.9544	11.4162	7.39461	6.6568	12.5375	10.2199	7.70333	6.23265
arahy.GIH6UL	6.70201	12.8127	7.95841	6.46778	7.38399	13.324	7.87052	7.42539
arahy.1WCV8C	11.1018	2.40036	4.07788	1.89416	8.88605	1.69474	5.09471	2.55585
arahy.3TL5KL	0.712258	3.17466	2.96106	2.60783	0.691388	2.65328	3.12099	2.58522
arahy.UUK6GZ	0	0.197193	0.0114516	0.0345489	0.0277309	0.0448677	0.0250332	0
arahy.D7EMLG	0.102119	0	0	0	1.37543	0	0	0
arahy.JZIS5A	10.38	2.25781	2.27651	0.524294	9.47145	2.5696	1.36772	0.30255
arahy.GFC3N0	0.729144	0.207734	0.95075	0.350723	0.188707	0.0584358	0.159399	0.610955
arahy.VT20D2	13.7758	42.1523	17.6196	16.3744	14.1564	38.8075	17.2563	11.6919
arahy.FGA0WN	1.30075	0	0.0335595	0	0.675026	0	0	0
arahy.R7PSBK	10.5463	0.17477	0.0888159	0.095691	9.16954	0.0694189	0.0271227	0.0246891
arahy.755JPD	3.59409	6.08381	3.15208	1.77366	2.93535	4.90324	4.21602	2.5591
arahy.PP6MCW	0	26.4363	1.65691	3.54896	0	3.02269	0.43541	0
arahy.78HSE8	0.82266	1.70941	0.697251	0.572091	0.53374	0.843111	0.73729	0.985302
arahy.B1R1KQ	92.0095	7.70179	5.36286	2.43051	74.4702	12.1899	4.84499	1.35688
arahy.TEUF1S	0.275921	1.51754	0.558036	0.652444	0.442812	0.996315	1.24107	0.39536
arahy.I61FSR	0.663427	0.885533	5.77721	7.7671	1.37921	1.11365	6.27508	7.14445
arahy.96ZVDF	3.93728	8.7683	3.49246	5.1193	4.48078	6.60264	4.51616	4.17375
arahy.2DI66Z	0.19884	5.10997	1.41575	0.506677	0	6.87408	1.71605	0.756371
arahy.LZ43MP	3.74437	14.5492	6.31219	4.0509	4.78137	14.3429	7.97402	4.33153
arahy.P8XRWE	13.4426	4.75242	10.0609	10.0656	9.69808	7.62159	8.5451	7.35937
arahy.69P7AU	18.3332	29.4515	30.4773	16.6907	20.3544	42.51	27.9216	23.3931
arahy.ZI4JU1	2.42008	25.8849	7.30534	2.98669	4.73752	23.5289	8.00796	2.35914
arahy.DP6VSE	0	0.358284	0	0	0	0.513495	0	0
Novel01283	0.121693	3.32087	0.39311	0.246421	0.2241	1.85948	0.615642	0.143084
Novel01628	126.089	31.0376	65.8391	62.759	127.794	70.4591	42.9954	35.9423
arahy.UUZ1A7	0.190725	1.51656	0.218859	0.0303598	0.261415	0.616254	0.175975	0.0730636
arahy.D35KDK	0.0293335	270.527	0.243748	0.0231447	0.0394972	112.628	13.3412	0.107313
arahy.D53E9A	2.02581	0.573323	0.60176	0.483396	2.53976	0.206491	0.793333	0.507172
arahy.LXP3AQ	2.01802	6.857	5.65518	3.03091	1.76944	8.17768	6.82921	3.2277
arahy.K5TUWL	10.8184	27.1436	12.5662	14.5888	5.73169	12.8656	10.9267	12.2417
Novel01817	0.655395	2.65161	1.71821	0.820724	0.683283	3.21344	1.87083	0.61744
arahy.IS373J	0.163969	2.05386	1.21791	1.00474	0.134921	0.451318	0.370114	0.413349
arahy.GEQ2UZ	14.4366	0	0.244729	0.080519	13.9271	0.929498	0.117678	0.321358
arahy.44SN5D	1.01187	2.58263	1.63261	1.24754	0.76623	2.17848	2.03807	0.945623
arahy.PIK6SY	6.39318	7.27366	8.02242	7.74717	5.95802	7.41053	7.63915	7.58518
arahy.QI4XI6	2.88583	4.62227	2.64233	3.21871	3.66744	4.8489	3.13566	3.15247
arahy.58UXC0	1.36807	6.85302	6.22099	4.91173	1.32268	7.86122	5.03714	4.69005
arahy.3WSI1D	2.77922	6.47185	2.95519	2.25788	2.21289	4.69299	3.38991	2.8768
arahy.P4PJLA	7.32572	20.7877	11.9799	8.32528	7.95608	16.1859	6.41378	4.26019
arahy.L00MPK	0	1.60249	0	0.165511	0	1.13638	0.241894	0.22019
arahy.I3ZB1W	2.24544	9.62431	5.68372	5.16862	2.37745	8.32137	9.10976	5.7
arahy.534T08	0.112074	0	0	0	0	0	0	0
arahy.8TQ35A	12.3043	37.7623	28.7675	13.7525	11.6621	30.401	17.6859	11.8198
arahy.08TZJZ	0.12151	0.348842	0	0.0220349	0.234983	0.194094	0.102115	0.0253524
arahy.CN40UY	12.567	1.62643	2.92586	2.49727	21.2105	5.23857	1.83118	1.80925
arahy.F0HWYS	13.8505	24.8656	17.4818	11.4245	13.0426	26.7199	15.638	12.8381
arahy.GR4ZGT	1.20641	0.539225	0.402737	0.209611	2.35965	0.743214	0.440564	0.158664
arahy.NX75ZF	22.1147	5.02707	1.77967	1.55039	31.5893	5.32582	1.69527	0.983024
arahy.E6P4EG	0.675532	2.59501	8.98334	1.8934	1.11712	2.59719	19.6062	2.42093
arahy.R485W7	0	0	0.431905	0	0	0	0	0
arahy.NRK3PF	0.643255	1.60203	0.856677	0.950932	1.01573	1.02962	0.803702	0.488958
arahy.QR17ZP	0.0231822	1.90768	1.32868	1.03798	0.351667	2.16994	1.37676	1.88305
arahy.UH4MW5	6.70926	8.99746	1.09861	0.794375	7.85403	5.61921	1.79638	0.242263
arahy.0UJ9QK	0.491652	0	0	0.167694	0.0899873	0.364826	0.36552	0
arahy.LZK65C	14.2894	17.3476	17.857	13.353	16.4177	24.8126	31.3861	25.9532
arahy.Q3A75N	0.124234	0.0429822	0.0538438	0	0.161288	0	0.0401176	0
Novel04242	0.300558	1.79433	1.31602	1.1918	0.528199	1.48424	1.84317	1.95675
arahy.D1L6LM	0	0	0	0	0	0.140339	0	0
Novel01995	0.567825	4.22462	3.05032	4.68194	0.654422	5.35587	4.17592	5.36105
arahy.Y73929	9.60331	6.70329	11.704	9.15287	7.79984	14.3983	11.1392	9.30528
arahy.QM61S2	3.71744	6.66313	3.79997	3.10841	4.49674	7.30902	4.02789	3.52389
arahy.2Z9HD9	0.219392	0.247182	0.314064	0.0796901	0.163412	0.243901	0.186772	0
arahy.EHG7VU	23.8485	52.1462	31.211	18.4318	25.5026	54.447	36.5029	27.145
arahy.TI4NWN	0.0207195	0.244845	0.0626354	0.043582	0.0252795	0.450611	0.0627515	0.031159
arahy.N0HKNA	0	5.85518	0	0	0	2.41473	0.456938	0
arahy.80FISQ	9.32207	0.316544	0.0614473	0.0745112	7.25618	0.322237	0.231398	0
arahy.G0J8BA	0.319158	0	0.0132964	0	0.109108	0.0435128	0	0
arahy.K2KWL3	0.282159	11.3659	0.78709	2.10666	0	2.40099	0.81696	1.76821
arahy.A9LG26	0	0	0	0	0	0	0.105682	0
arahy.VM8KEN	3.75242	6.06887	2.47804	4.23302	2.13763	4.41676	2.46345	2.37248
Novel01824	0.0345251	0	6.98367	0	0.0794878	0.0441391	0.0215265	0
arahy.TY26DT	0.243669	0.0975127	0.0138128	0.0206602	0.346046	0.0231627	0	0
arahy.0E5XS1	0.349848	1.24143	0.088133	0.245294	1.87324	0.765792	0.353186	0.350745
arahy.FQS251	8.33997	30.2726	7.64103	3.45722	4.05705	19.6676	7.12522	2.42588
Novel04552	0	1.0189	0.16159	0.0459713	0.0643682	0.770394	0.116213	0.255175
arahy.91VD76	0	2.58488	0.033932	0.14166	0	2.36989	0.30906	0.0675199
arahy.2Q5L9E	2.04222	0.313211	0.130625	0.193222	4.48994	0.107397	0.0350008	0.127441
arahy.G51Q6K	1.0495	2.07071	0.892076	1.63772	0.977221	1.41772	1.39351	1.07158
arahy.PKFN9U	277.589	24.6915	8.34533	4.1513	383.121	21.9269	9.33534	3.21993
Novel04489	0.333982	3.99341	2.58756	2.25279	0.247212	4.66308	2.60417	1.67362
arahy.L6JJW9	0.0486301	0.303819	4.0568	1.46368	0.0447848	0.464178	0.848945	0.21111
arahy.DIZ6KI	0.888999	0.750109	0.142043	0	2.87088	0.365482	0.0951508	0.0692905
arahy.HKZ8UA	166.672	62.9098	95.9785	48.7955	147.671	119.914	92.7657	54.4312
arahy.FXK9PR	9.94615	0	0.21125	0	13.897	0	0	0
arahy.HFGS9U	1.85556	4.25434	4.9777	3.66659	1.81495	4.72705	5.22451	3.5099
Novel01814	0.398018	3.00086	0.911368	1.67029	0.357323	0.731092	1.25507	1.64388
arahy.ECRQ6L	0	0.201078	0	0.110536	0	0.49691	0.344051	0.170837
arahy.3A5YKQ	1.84265	0	0.104702	0.259362	1.47012	0	0	0.670206
arahy.ZNEZ2M	0	0	0	0	0	0	0	0.914635
arahy.RPSG4N	3.16691	4.20886	0.68992	0.640913	2.48954	3.78707	1.35003	0.44094
arahy.S844Z0	0.801555	0.524382	0.271805	0.218291	0.463604	0.251901	0.255445	0.287873
arahy.A3UPJU	0.367351	4.87726	1.61294	2.10565	0.0591093	2.90046	0.960405	2.22907
arahy.6ERH6H	0.154521	5.76818	0.90518	0.105162	0.584594	3.10653	1.1037	0.11033
arahy.GFJ9I4	4.96306	5.93529	2.12073	0.919258	3.17233	3.98046	3.10137	1.7715
arahy.C7CG90	2.66715	11.8874	8.9324	9.64283	1.8263	6.01632	6.48168	8.98082
arahy.3DIB68	0.72547	12.2711	2.54676	0.669361	1.09943	13.1043	4.20212	0.610403
arahy.G7DPQJ	0.298763	0.0613641	0	0	0.413122	0.117198	0	0
arahy.66YQP5	10.4526	13.8126	9.52488	7.05897	8.13255	12.8536	8.70689	6.5612
arahy.JRQ3DB	20.5724	28.6777	11.5327	7.14047	18.1642	26.3326	9.75792	6.02783
arahy.ACA5RJ	0.0659981	0.195807	0.403626	0.150481	0	0.26539	0.145366	0.198502
arahy.KK3MU5	1.18389	0.983851	1.70565	1.84295	0.679279	2.14115	2.92164	1.5434
arahy.I9WEFC	0.252711	0.408812	0.0886002	0.233605	0.240134	0.442187	0.261104	0.237686
arahy.X8VU69	1.78808	1.90769	1.36038	1.71717	1.91064	2.5192	1.85059	1.45328
arahy.EN81KK	114.545	45.83	26.0349	18.6586	65.4481	29.7376	13.9349	10.7625
arahy.GJWA3D	3.34163	3.84157	2.61428	2.28681	2.26295	3.78701	3.48993	2.5586
arahy.2FQ1SS	6.47897	6.2658	4.02259	3.22307	5.79135	7.00727	3.36069	2.28384
arahy.96RWGK	39.3026	33.6544	20.7161	18.0999	33.4598	31.1208	25.2368	17.1166
arahy.IG8WT5	0	0	0	0	0	0.102856	0	0
arahy.P17M1H	174.239	164.444	230.707	138.584	168.09	157.993	164.193	132.78
arahy.C865UE	0	1.21879	0	0	0	1.77885	0.0971897	0
arahy.Y2C9I0	6.13487	3.16292	3.84536	2.17267	2.4586	1.75247	2.09047	0.895628
arahy.SA7CU8	1.08195	6.84977	12.068	5.89907	1.40157	7.08043	11.0444	4.73997
arahy.R3N6QG	0.142273	0.0340345	2.13847	1.1573	0.981303	0.676103	0.677666	1.6131
arahy.098P1D	0.0111235	0.0263454	0.108131	0.025148	0.0369411	0.11397	0.0735076	0.033456
arahy.2B0YSC	2.56867	5.29169	5.28512	4.363	2.14774	3.60543	4.328	3.47283
arahy.MKFK5S	65.2088	50.5468	32.9878	37.2017	52.9805	30.6802	36.6404	37.805
arahy.BA0153	0.168092	0.053321	0.102308	0	0.163265	0.0699452	0.123973	0
arahy.7FE6CR	0.337888	1.7999	0.334857	1.00732	0.206125	1.24869	0.527183	0.956776
arahy.BXF2YD	0.0572948	0.825859	0.181895	0.0435648	0.0485599	0.03492	0	0
arahy.9S5M62	11.19	6.74775	5.4025	3.68319	9.74419	8.34794	5.66381	4.07089
arahy.YG552F	19.4628	29.3093	17.3623	13.884	19.2097	25.2639	16.6619	15.194
arahy.JWB9EG	76.1562	52.1078	105.909	78.7719	103.642	112.186	75.2568	61.6712
arahy.0079YX	1.41483	11.9253	3.99061	9.06687	0.735263	6.9548	4.18816	5.66306
arahy.529T30	4.52092	8.77604	3.38522	4.47977	2.74491	7.54181	6.39956	3.71509
arahy.Y6KX4T	23.3627	13.072	9.14029	9.34236	22.3927	20.1406	11.1633	8.89834
arahy.53C9AK	0.2809	2.89576	0.903282	0.292209	0.238778	2.25465	0.700878	0.17549
arahy.NWH4GH	0.430743	0.581524	0.156044	0.125058	0.378441	0.378515	0.223218	0.0377
Novel04737	0	2.73199	0.546882	0.962111	0.00979553	1.01383	0.287382	0.208847
arahy.W2RHW2	0.519209	8.72769	20.9414	17.1382	0.550382	7.12756	25.3618	20.0641
arahy.7A7AL1	0.183059	1.99018	1.25032	0.777405	0.182934	1.8308	1.14354	1.03447
arahy.47TAEF	0.254965	0.655659	0.399843	0.541335	0.085243	0.47982	0.506516	0.385299
arahy.LDA2L2	2.19952	5.16383	2.27744	2.12159	3.05674	4.18345	3.23847	1.59244
Novel03379	1.72982	1.67245	1.4393	1.4374	1.86151	0.935433	0.649929	0.688706
arahy.ZUE09J	0.96341	0.576356	0	0	2.9179	0.722105	0.141982	0
arahy.QLC8G3	1.66709	1.56893	4.00584	2.5756	3.44814	4.70097	4.02825	3.52934
arahy.L75CTN	8.43701	5.04736	5.96337	3.80634	8.17595	5.33561	6.19054	4.12594
arahy.AJV249	0.938228	1.63779	8.30143	1.94663	2.00032	1.80312	7.84702	1.92852
arahy.TTC9TX	0.838981	7.70612	1.8874	0.662869	1.53337	7.46252	2.85022	1.36768
arahy.JA22RM	17.5344	12.0155	13.2894	10.7202	11.8164	13.3182	12.8358	9.40109
arahy.KS67M3	0.0470944	1.0315	0.627705	0.715562	0.655229	0.916028	0.471901	0.510084
arahy.Z50VDZ	128.392	24.8363	12.249	8.75475	93.0914	30.4822	12.8784	6.50381
arahy.83FVM6	6.92462	6.33074	4.48827	2.82327	6.37517	6.84434	6.27707	2.59327
arahy.G5HQY4	0	0.581319	0	0	0	0.162665	0	0
arahy.FNRX56	0	1.14048	0	0	0	0.249464	0.127581	0
arahy.E2R4RP	0.117848	1.08547	1.18221	0.482474	0.215928	0.805962	1.71445	1.09133
arahy.RQU8DI	0.0963083	0.127577	0.222885	0.363057	0.198565	0.159055	0.1159	0.0984794
arahy.I1DLEE	0	0	0	0.386617	0	0	0.0547915	0
arahy.U9RCFT	1.36231	2.57311	0.699044	0.450458	1.51776	1.63139	0.60471	0.339999
arahy.KB76RH	2.33624	2.33641	15.1763	22.2141	1.83193	2.86197	17.5047	20.3395
Novel01501	2.36846	6.0826	4.5753	4.23225	1.61964	6.88167	4.35624	2.55062
arahy.R19W3K	0.43942	0.0203179	0.17121	0.126586	0.892083	0	0.158023	0.0690491
arahy.ULT5P9	2.86283	10.3413	5.72164	6.59065	2.4084	6.90562	6.75914	4.9573
arahy.NKR24F	0	2.58359	3.16262	1.51611	0.786411	1.8691	3.3522	0.430806
arahy.0RL0PX	11.6619	12.9879	12.1138	11.4309	15.4984	17.9286	11.4891	8.90241
arahy.YBFT0T	28.1551	20.5837	20.7226	25.0751	25.3309	24.4904	29.5765	29.3283
arahy.T0XH3Q	12.7026	34.8107	31.7044	11.7935	18.3838	47.6235	29.9992	13.9965
arahy.AY0C6D	31.4348	17.2354	10.6172	7.74111	28.7885	16.9594	11.1803	10.2633
arahy.13YRQ9	0.430363	0.550864	0.147572	0.430446	0.279648	0.225451	0.293179	0
arahy.W1HAKQ	0.289996	0.223383	0.10306	0.0928767	0.362009	0.160961	0.154289	0.0589794
arahy.TDW4P3	25.0741	13.5356	12.2293	11.5091	25.026	17.9902	9.53876	9.94062
arahy.X1G7WL	3.38479	13.6688	5.25241	4.55964	3.27971	9.37065	5.94554	4.87604
arahy.SUU1LP	2.75541	7.12576	4.18673	2.15294	2.05447	7.84749	4.53661	2.72968
arahy.6P10V3	4.08503	3.4516	2.73893	2.00183	5.44048	5.18706	3.14219	1.67329
arahy.KT8NWR	14.2729	10.0468	11.6908	8.86276	16.7342	12.7788	11.381	8.97222
arahy.12AFKW	3.42015	2.92707	0.932798	0.686514	2.7113	2.6417	1.73466	0.776478
Novel04721	6.2538	2.80636	3.01558	2.70971	7.23498	3.85431	2.4932	2.45307
arahy.1S342R	0	0.237203	0.0526429	0.0378712	0	0.198407	0.0276744	0
arahy.463B8J	0.445258	3.73825	1.67124	0.6307	0.740893	2.57038	1.22878	0.595057
arahy.4UU729	2.96644	12.6707	4.16957	3.72264	2.18768	7.37292	4.34732	3.17952
arahy.RS14VD	6.04185	9.59276	6.9104	5.01172	6.79699	8.73359	5.50334	2.95552
arahy.B0P3FA	9.92573	16.3454	10.5681	10.2584	9.17649	15.03	10.2864	8.88283
arahy.XTU872	6.90037	0.123384	0.116225	0.0290094	7.18605	0.0232385	0	0
Novel01377	3.18989	8.69525	2.51052	3.18475	2.12643	5.54329	3.18363	2.7031
arahy.KH1BCW	0	0.646327	0	0.0748544	0.0403963	0.383232	0.0546997	0
arahy.52XSZL	14.6439	13.2166	10.5374	8.41197	16.4304	15.5616	9.19426	7.14546
arahy.M14IWL	1.05475	0.829185	0.929182	0.83882	1.18959	0.644534	0.384462	0.566938
arahy.7NK30A	0	0.200068	0	0	0.0103062	0.242256	0.0139554	0
arahy.T1S75H	0.806826	2.94368	1.62794	1.37411	1.42426	2.1622	1.13993	1.27458
arahy.IXJG6V	1.22336	11.6442	15.8508	2.67549	3.79101	20.5318	7.49516	5.17345
arahy.WLQA50	7.51502	2.17813	0.0467758	0	4.45134	2.49544	0.406579	0
Novel02896	0.201447	0.583641	0.566344	1.04055	0.0710134	0.697	0.749203	0.312721
arahy.P8Q0JH	0.253918	0	0	0	0.21629	0	0	0
Novel01693	3.08962	5.22611	5.09866	4.32085	3.44054	6.92937	5.79126	3.44412
arahy.1YIR2K	0.27677	0.0552488	0.064169	0	0.794942	0.269605	0.0140274	0
arahy.L5P6ZA	11.6008	4.43861	5.24434	6.42204	9.42401	4.99094	4.15911	3.68101
arahy.K55SN3	6.98289	6.63764	4.10763	4.27099	6.27699	6.52452	4.0421	4.87003
arahy.Z8IVUX	0.659086	1.76742	0.952063	0.531225	0.389655	1.37792	1.81684	0.682111
arahy.HE7D3F	14.7751	12.1731	5.6791	3.9748	14.6382	9.93262	6.05938	3.58673
arahy.PF0HW7	0.466523	0	0	0	0.259307	0	0	0
arahy.FV54AT	0.0337455	2.46188	1.12802	0.575112	0.123893	2.89667	1.06384	0.240373
arahy.T59H3J	0.191849	0	0	0	0	0	0	0
arahy.IAC0XP	0.852611	0.596709	0.0487899	0	1.30187	0.359453	0.0813344	0
arahy.NS41IF	1.02226	3.35398	7.47558	3.32942	1.71755	6.22453	10.4419	5.44644
arahy.SB3DY1	1.06047	2.56338	2.64497	2.7234	0.211549	2.06813	3.29412	2.30097
arahy.ISCF2K	14.3009	18.9122	7.43163	6.16386	13.7272	13.2827	7.20065	6.53967
arahy.X44WLI	79.9283	113.006	165.174	128.642	63.2983	111.067	187.036	156.263
arahy.76STP5	0.0475269	0.360876	1.2639	0.919211	0.0328266	0.385256	0.809948	0.704622
arahy.674JY7	0.581288	2.61471	1.32327	0.962082	4.0714	22.6744	19.7627	18.0698
arahy.5RC8JY	14.2067	21.2899	12.6688	9.7267	11.1872	20.2519	11.2662	6.31019
arahy.4DU4Q1	0	0	0.107086	0	0	0	0	0
arahy.T1UA0C	2.94573	0.226936	0.294744	0.0895179	7.24088	0.260226	0.113045	0.0649918
arahy.LCX1I7	5.60428	7.68208	7.82849	5.97252	6.17288	7.4367	7.18762	6.10862
arahy.VLH7KT	8.76055	7.27224	5.47761	4.57897	8.13495	9.05391	5.22973	5.19356
arahy.QM1PW2	7.91515	0	0.0339233	0	7.44225	0.0712148	0	0
arahy.CNZT88	0	0	0	0	0	0.13542	0	0
arahy.VLT5AV	9.52424	8.92174	5.46197	4.15931	8.19297	10.044	4.6775	4.08792
arahy.I2VP0Y	2.87013	4.46428	2.91194	3.61866	3.47841	3.84981	4.18876	3.49973
arahy.LGDT7B	6.38225	15.9538	5.76734	6.02668	5.43624	9.28689	8.12648	6.01469
arahy.76PVGY	3.51475	0.202629	0.307421	0.255373	3.82216	0.319078	0.226364	0.610971
arahy.496WES	31.407	31.5214	18.4328	12.3485	35.3043	32.5904	23.5668	16.6581
arahy.ARS1HB	0.264899	2.33571	0.561851	0.351176	0.918908	1.46667	0.188109	0.205477
arahy.G3FV2L	1.87072	0.665491	0.98293	1.13118	2.11652	0.60963	1.04777	0.747166
arahy.URJP9L	6.56075	25.3338	8.57971	9.53152	5.04397	16.7255	10.1295	8.44153
arahy.C9XA4X	2.6489	9.9487	5.65707	4.20093	4.09481	9.73706	5.49418	4.14971
arahy.UU0CZS	1.68091	4.51684	933.331	1001.16	1.37177	3.27182	889.365	1264.97
arahy.U677JH	0	58.1593	1.15792	0.810969	0	34.7802	4.99307	0.263059
arahy.QLSU9X	0.103079	13.9421	2.90763	0.785891	1.56525	12.2787	3.59027	0.589603
arahy.36F1KB	18.3895	21.6174	23.3514	17.855	18.3612	17.5102	19.9882	13.5798
arahy.Y2VA06	13.6444	10.1352	5.35807	3.77157	12.6004	8.49419	7.2264	3.64636
arahy.9KWN96	0.657656	2.45235	1.05506	0.778491	1.15165	2.24533	0.916771	0.641701
Novel02489	0.0420278	1.18059	0	0	0	0.326803	0.0281515	0
arahy.LJ4E0Z	1.24418	4.39201	1.97991	2.87068	1.14	4.54069	1.03911	1.30977
arahy.DAE2HF	26.7196	3.58978	0.802327	0.461363	32.2224	2.22221	0.774895	0.352974
arahy.WJM3KC	4.83683	0.0202006	0.0358653	0	8.38525	0	0	0.062623
arahy.X036C8	2.18884	3.15172	2.27815	2.9533	2.59672	3.04755	2.71046	1.88739
arahy.9PA5H9	37.3526	27.9467	29.8225	23.7069	32.9872	40.6044	31.4715	18.9076
arahy.6HIR6Y	0.0263241	0	0	0	0.2363	0	0.0176327	0
arahy.DC2STY	0.201185	0	0	0	0	0	0	0
arahy.5A3JDR	0.431467	0.253336	0.465355	0.231453	1.46067	0.199611	0.141469	0.0858502
arahy.4883XF	0	3.1145	0.625163	0.180242	0.165307	2.40578	0.562992	0.425948
arahy.GM6JEQ	11.6492	13.0291	8.93365	8.13689	11.6554	14.7457	8.26672	6.78933
arahy.3E939S	0.179982	0	0.301229	0.307134	0.894644	0	0	0
arahy.M088MF	0	0.121908	0.264373	0.155708	0	116.85	16.1189	0.103574
arahy.76TZ3N	2.59433	12.6389	4.16492	3.82643	3.01024	9.01094	4.35574	3.04144
arahy.5D1K5R	14.6689	9.8643	15.6826	8.43137	13.1872	12.5113	14.4995	9.34382
arahy.SCF8I0	0.245553	1.40521	0.878323	2.98534	0.727597	0.888007	1.27494	2.94524
arahy.X0V17W	4.15041	2.21512	4.68866	1.86794	5.66825	2.54242	5.25312	1.36177
arahy.6G1AZV	0.467549	0.1383	0.2103	0.165447	0.563732	0.450543	0.959707	0.477733
Novel03521	0	0	0.302977	0	2.91369	10.1748	5.66535	3.76217
arahy.JA1EPG	23.3373	4.50428	1.75139	0.677725	8.46006	3.87586	2.1926	0.784672
arahy.WGP01G	1.23105	36.2225	7.89314	2.07399	4.27219	20.9947	9.48626	1.91117
arahy.R1GQBP	24.656	11.5182	8.78541	8.11533	20.8645	11.5337	10.755	8.47454
Novel01953	5.23394	3.97046	5.70674	3.54692	6.31963	7.08487	5.93988	4.99724
arahy.SDZN59	47.1565	12.1792	12.7855	13.7507	41.025	19.1179	13.4016	10.096
arahy.U6R6BR	0.0656154	3.87071	0.0402114	0.0601454	0	1.16901	0.571366	0
Novel02421	0.685219	3.51735	2.55057	2.42386	1.01017	4.0084	2.3646	2.68165
arahy.QG1AXF	1.82971	4.93444	2.7757	1.17678	2.16115	3.59534	1.97237	1.05874
arahy.G00P8D	8.83197	0	2.38309	7.73005	11.6583	0.025227	2.26906	6.23471
arahy.V829EQ	0.045738	0.483299	3.07386	1.95534	0.177393	0.765437	3.74018	2.38112
arahy.Z1TE7K	0.379099	0.961251	3.98743	1.69978	0.696688	3.73161	2.0241	1.05726
arahy.I9GNP2	2.07021	8.06322	20.7602	9.20859	3.70779	11.13	18.8464	9.42467
arahy.1YV20X	41.7828	13.986	10.8258	8.06382	27.5643	19.6044	10.2844	5.97371
arahy.8YAE8B	0.313164	1.40455	0.482165	0.595539	0.296851	0.708463	0.387189	0.351516
arahy.4ZTL4S	14.2897	21.0577	10.1418	8.87473	15.4838	19.871	10.5247	7.09989
arahy.X46T81	3.1898	5.31738	3.72921	2.20479	2.6045	8.15842	3.26151	2.18299
arahy.31H9ZG	0	0.0232321	0.0396774	0.0255421	0.069093	0.0998025	0.0867351	0.367035
arahy.2HZ4K3	0.243963	0.214871	0.075973	0.270014	0.30548	0.381098	0.485785	0.334876
arahy.2E7PU8	0.0558961	2.11608	1.22014	0.870395	0.265479	1.53434	0.987414	0.727958
Novel03343	0	1.96559	0	0	0	3.16782	0	0
Novel03714	0	0	0.221132	0	0.995631	8.03157	5.89402	6.08299
arahy.EYNG7S	24.6508	6.39304	3.85585	2.21336	17.515	7.39696	6.59084	4.0569
arahy.D0QZQ6	1.254	0.171725	0.4937	0.262274	4.01648	0.141028	0.533874	0.28937
arahy.96T71F	0	0.0996795	0.364279	0.210871	0	0	0.341111	0
arahy.84CV5L	0.782734	9.15182	5.82459	6.02471	0.795989	8.1222	7.56276	4.59358
arahy.CDA9C7	0.344408	1.00018	3.08187	2.4831	2.27821	1.87822	3.66609	1.54644
arahy.EWQ7EA	0	0.694272	0.0577075	0	0	0.207681	0.0214982	0
arahy.K7KBAQ	5.37298	2.7229	1.45155	0.325763	3.20375	1.68822	0.322315	0.142059
arahy.M4INHU	5.20613	16.0214	11.9899	9.71946	5.17508	13.4463	10.803	8.8364
arahy.UDAM90	1.67088	1.9386	1.19878	1.33334	1.56631	1.91704	3.51514	1.76607
arahy.PA307L	6.17274	0.584996	2.69272	1.4688	10.9312	1.98625	2.35948	1.63804
arahy.59PC4W	1.66694	0	0.178021	0.108617	0.991011	0.0261803	0	0
arahy.28WWIL	0.0803315	0.38524	0.437661	0.0856155	0.0622056	0.552816	0.626327	0.138695
arahy.K0G9DF	39.3289	275.968	185.536	101.002	49.5352	199.83	159.7	102.549
arahy.DDL5N9	0	0.0399401	0	0.439115	0.0825911	0.0703521	1.41657	0.123816
arahy.T1MC5G	1.12748	2.16108	1.83486	1.74793	1.1687	2.06674	1.70124	1.58817
arahy.A3RENN	3.13408	6.04824	2.54168	1.31491	2.82965	5.19924	1.67769	1.10773
arahy.DIK43V	0.0304131	4.96053	3.84507	2.2562	0.481686	3.74722	3.36117	1.89853
arahy.04F84Q	0.673355	0.0298698	0.0749483	0.0553111	2.27519	0.0143122	0.0682485	0.0641842
arahy.M165LK	0.0265592	0.0829648	0.0991779	0.045709	0.0527658	0.0908324	0.10487	0.0301477
arahy.SDY5DC	0.734328	0	0	0	0.485863	0	0.0671868	0
arahy.ES1ZP9	0.598099	135.295	36.7945	23.4885	0.588066	117.404	40.5603	21.7421
arahy.CY7VGA	0.196979	0	0.0885432	0	0	0	0	0
arahy.PB1D04	13.3874	1.47817	0.640219	0.0425806	9.90485	0.706818	0.216444	0
arahy.W1BVEK	1.48392	1.00921	0.596551	2.61416	1.63703	3.74878	5.84241	2.08256
Novel02513	1.17296	0.531621	0.33861	0.592839	0.73954	0.241518	0.148435	0.0900777
arahy.TDTR61	8.5832	28.0097	11.9339	19.089	7.25238	18.7748	15.7089	15.0906
arahy.J3GQ4Y	1.49299	1.95601	2.54116	2.16408	1.39412	2.3987	2.58734	1.97041
arahy.Q0CWXY	34.469	6.93332	4.98894	2.17384	38.4203	13.8358	3.50217	0.813291
arahy.1QJ78E	34.2684	1.82269	5.68209	2.57428	45.7926	1.8168	6.08587	3.66372
arahy.69QRE7	97.9215	1.43238	1.40226	1.94057	127.415	1.55561	1.41087	0.983519
Novel03691	0.616499	0.225642	0.622145	0.0815495	0.933909	0.459887	0.189524	0.139885
arahy.8EP2TM	0.134107	5.95291	0.928137	0.696353	0.52222	2.00445	0.934978	0.450015
arahy.EKVQ39	0	1.78705	0	0	0	0.48426	0.343745	0
arahy.K2SWWG	89.6013	0.192592	1.77477	0.284553	153.297	0.706239	0.250223	0.3562
arahy.G1LB4T	2.37783	10.7233	3.01374	3.31686	1.39673	5.48317	2.54279	3.00523
arahy.D0E55K	1.63886	13.7106	9.20233	5.56306	1.43526	10.8546	8.68888	6.40393
arahy.H5KDYL	12.2876	8.72865	5.72657	3.60467	13.935	10.0394	6.68819	5.18149
arahy.0L0HR0	0.555935	2.42295	1.75273	0.90154	0.826583	2.2217	1.84283	1.25419
arahy.LT7EDZ	0.23276	8.05175	0.131607	0	0.154218	6.23936	0.449683	0.062978
arahy.KY1MX1	0	0	0	0.234144	0.164397	1.22636	0	0
arahy.TUNW8N	7.13358	3.97535	3.93092	3.98053	6.07275	6.34336	3.43553	2.6727
arahy.KWAB0D	8.14396	8.33297	5.8019	4.0437	7.63944	7.8147	5.81046	3.44719
arahy.NNJC7T	53.0142	218.903	64.8754	64.6572	72.9024	185.702	80.2144	59.4016
arahy.U0MI69	0.549697	0	0.306566	0.167989	0.280558	0.0506069	0.329856	0
arahy.4L9II4	1.1685	1.22631	2.38626	0.378597	1.64232	1.79964	3.20132	1.99519
arahy.8F47NR	12.6007	21.7064	11.6032	6.79443	9.94236	12.3466	8.44046	5.31577
arahy.ZMPK13	0.744716	0	0	0.149976	0.895909	0	0.093175	0.261345
arahy.63YDIT	0.91897	2.29378	0.560879	0.495765	0.533288	2.46499	0.744887	0.343416
arahy.0LVW4F	0.900715	2.90912	0.797817	0.972101	0.648154	1.6979	1.0173	0.945085
arahy.4NCV9J	1.07297	2.79773	1.78662	2.37054	1.01691	3.65759	2.09018	1.53663
arahy.R7UPJF	4.6438	4.69015	3.93122	3.60812	5.71233	4.1852	3.25488	3.8313
arahy.XPT1GW	7.7598	12.6521	7.42808	5.87594	6.57314	12.6683	7.69929	5.90374
arahy.8Y4PDX	9.29458	1.1971	2.30193	1.88874	20.6866	1.98821	2.15749	2.35636
arahy.64XXL3	0.534906	1.58341	0.64051	0.718885	0.457764	1.50597	0.72647	0.498742
arahy.WE07RT	7.84811	12.9945	8.02708	9.40043	1.09515	0.172646	0.231362	0
arahy.62QC1P	0	0	5.24291	1.36596	0	0	11.9322	2.75257
arahy.XIC2ZC	0.156491	0	0	0	0.0214943	0	0	0
arahy.GLEC2S	5.9227	2.8549	1.19864	0.947778	5.97897	2.89889	1.8876	1.34655
arahy.9PT08I	0.264377	0.11086	0.029482	0.0212093	3.95072	0.0582932	0.0464961	0.0514774
arahy.AD2HDF	5.31838	0.140512	0	0	18.0002	0	0	0
arahy.4TB0JC	16.8942	11.0302	7.12629	5.76463	15.0066	11.273	6.83984	4.9727
arahy.JFFF29	0.0319059	2.95011	1.70261	2.92971	0.203512	2.18851	2.35555	2.17923
arahy.M1C18U	0	0	0	0	0.36474	0	0	0
arahy.09FGJA	8.48031	15.0764	10.168	7.9604	14.7715	15.6329	13.3213	12.9763
arahy.X7UDDV	3.45074	5.37339	3.13753	1.65788	1.78201	6.84647	4.36674	0.895246
arahy.FVSM65	0.497717	7.59886	3.02782	3.38889	0.827278	6.33598	3.15434	3.41849
arahy.HHX0PC	12.4373	8.96073	10.6424	5.14452	14.4996	9.35027	12.3787	6.87853
Novel00196	0	2.57576	0.0812449	0.084226	0	1.40464	0.160384	0.0691562
arahy.1X72NK	0.387619	0	0	0	4.00927	0	0	0
arahy.E5GBGH	43.8334	30.0552	14.1316	11.8387	33.9504	25.8468	14.542	13.1939
arahy.GKWH5W	0.0420822	0.284082	0.0968426	0	0.0445735	0.25448	0.11463	0.0816638
arahy.F5AT8I	2.72116	2.62016	1.89509	1.06374	1.79034	4.40247	2.20067	2.00047
arahy.4D7KBI	1.75508	2.49548	3.46851	2.6306	2.80856	3.0158	4.45439	3.36527
Novel02526	2.10675	5.31462	3.25424	2.01837	0.672877	3.3922	1.62539	2.16636
arahy.H8QPA0	0.396527	7.84804	1.97604	0.814195	0.804209	7.39057	2.46676	0.458944
arahy.LEZM1J	7.28999	5.08788	8.1653	7.24091	7.92979	8.19201	9.22666	7.48257
arahy.MD2PB3	8.3283	6.47258	3.33715	3.0941	9.81715	5.65279	4.96743	1.68197
arahy.YKZY74	12.5162	8.68504	3.94388	2.061	11.9152	7.72024	3.2442	1.88811
arahy.CI8U65	7.27362	9.54581	6.61741	4.84991	6.28517	9.91122	7.55894	5.77973
arahy.31F9U3	2.84711	5.75355	0.895526	1.01567	3.42287	3.78817	1.20658	1.01276
arahy.X9H47S	0.130837	13.3971	3.41463	1.55449	0.839717	9.28421	2.94945	2.0594
arahy.KG07DI	5.99642	21.2106	9.05564	5.18643	9.69793	17.996	7.54317	5.47217
arahy.4DD1B6	0.892924	0.461442	0.0941191	0.0782905	0.545342	0.0846434	0.412296	0
arahy.J53S6S	0	0	0	0	0.314572	0.0249755	0	0
arahy.4RYA37	0.187692	7.74359	3.13747	1.68938	1.7864	11.6568	3.13278	0.85767
arahy.Q9R44R	4.97972	5.20798	3.98555	3.02391	6.19952	5.58005	4.37699	3.93846
arahy.N46I8Y	0	0.465935	0	0	0	0.0525166	0	0
arahy.PW8IDM	0.0370925	0.37309	0	0.0638373	0.0512392	0.0218231	0	0
Novel00918	0.520037	6.92359	1.06871	0.487839	0	0.0606548	0	0
arahy.FW6W1M	3.38042	3.21437	2.3793	2.62193	4.56369	2.87608	2.03457	2.35109
arahy.6D6Z2R	13.7345	31.4437	49.7435	16.8197	9.78207	34.175	33.7056	15.7611
arahy.E32WFZ	31.5076	15.921	19.8754	18.3186	32.0247	42.3998	16.6863	16.3214
arahy.ZV34CK	0	0.251998	0.0766686	0.0745438	0.0421865	0.28503	0.0380825	0.0632437
arahy.4F85GC	0.12075	0.00973769	0	0.0107059	0.0541879	0	0	0
arahy.WEM5LE	0.196384	0.125308	0.19152	2.20841	0.229	0.448581	0.953605	1.65142
arahy.S5KEUT	0	5.23299	0.10822	0	0.012317	3.46543	0.628181	0
arahy.5U72R2	0.154417	1.53267	0.357087	0.397371	0.419503	0.988244	0.549019	0.443533
arahy.NSK5D4	2.36657	0.447723	1.35715	0.940609	3.47052	0.829034	1.77609	1.41153
arahy.RG9N1V	0.590662	2.03478	1.43718	0.853065	0	0.0359232	0.0312196	0
arahy.49TA12	31.8476	29.6479	24.3641	17.8109	36.6876	35.5264	20.7144	16.514
arahy.RE3Q9G	0.0941452	1.23447	0.262984	0.0929846	0.25191	1.21043	0.492268	0.105474
arahy.0Z12M9	4.89906	7.5705	5.35278	5.35239	5.18973	7.71717	5.42784	5.81883
arahy.NU732K	2.63903	36.7512	15.9486	12.6405	3.02524	24.4698	18.8409	10.9576
arahy.GL3N7R	0.589156	3.17433	0.70813	1.19709	0.535872	2.65989	1.1403	0.390227
arahy.YLZA1F	464.622	319.842	169.458	116.478	345.524	209.317	127.316	84.0967
arahy.H04EJ4	1.42178	12.538	4.74165	6.43266	1.19609	8.63084	4.44495	5.4921
arahy.82YIJR	0.266406	0	0.489789	0.507475	0	0.136888	0.356893	0
Novel00329	0.559327	4.11676	4.94698	4.58279	1.10879	6.30782	3.1971	2.5642
Novel02539	0.0500168	0.385215	0.577881	0.488337	0.0552943	0.312273	0.578107	0.33168
arahy.68SH35	10.0702	20.6693	13.7501	11.8027	8.59894	16.9938	11.5992	10.2279
arahy.TH49EC	15.9543	9.53499	5.17352	3.96242	13.1233	10.7278	5.29513	4.53107
arahy.5E5ZG3	0.263624	4.17139	8.9086	6.5201	0.641972	3.29459	4.54728	6.37293
arahy.9QS057	153.4	44.7444	38.6093	36.0607	148.759	33.2607	38.7145	37.6613
arahy.47Q1NW	1.67675	0.0136404	0.011648	0	0	0	0.033947	0.0231779
arahy.UJWA1D	0	4.05783	1.21434	2.09741	0.230895	0.522005	0.341945	0.0778158
arahy.E4Y0Z3	0	3.90371	0.143431	0.0910773	0.045589	1.64215	0.545284	0.0561921
arahy.IZJM3F	4.81059	10.4475	7.03223	4.91824	3.82573	10.4664	6.16105	4.59123
arahy.AD4PBH	0	0.154325	0	0.108941	0.0102755	0.093991	0.816204	0
arahy.NG6CAB	14.5741	8.62083	8.66327	9.39582	9.89917	11.208	9.63095	7.26273
arahy.2N8YK5	0.260124	5.5225	2.19823	2.16568	0.426385	6.94074	2.10772	1.25713
arahy.3F07X6	0.525882	5.97255	0.575792	0.119194	0.958367	4.42245	1.10113	0.0611042
Novel00565	0.559953	1.6851	1.84772	1.36411	0.887003	2.70386	1.88494	0.59803
arahy.0HZN60	2.6294	4.52793	3.08953	2.28207	2.64374	5.06877	3.44354	2.24701
arahy.WVN0A7	1.39832	1.32367	1.9899	1.16392	1.17581	1.46764	1.8829	1.37715
arahy.H0MJIY	3.04546	3.08507	1.55969	1.12829	3.48007	3.18471	2.02718	1.03739
arahy.ZDU917	0.261044	6.94207	7.60686	6.45629	2.10788	7.45297	7.38111	5.76759
arahy.APGH35	2.84543	5.56889	3.48437	2.79284	1.28953	3.34708	2.18813	2.20849
arahy.8015QX	1.71821	0	0	0	1.65054	0	0	0
arahy.C4VQXX	1.98111	1.49888	0.550537	0.25348	1.68865	0.748358	0.249482	0.310318
arahy.C340QI	10.065	8.62669	5.48942	4.54935	10.1373	9.74428	4.50974	3.59146
arahy.96AXQD	0.0908801	0.080431	0	0.207214	0	0	0	0.13667
arahy.Y4QJ2G	8.77944	2.72057	3.20219	1.12499	5.95083	3.54798	3.7506	0.851556
Novel01233	0.0842228	2.81192	2.49424	2.1399	0.100916	3.05906	2.70064	1.49805
arahy.5TRY55	0	0.0246044	0.45862	0.761284	0.0169596	0	0.0612336	0.118083
arahy.PTJZ35	14.1063	41.9465	37.9447	27.6832	12.2945	41.9112	44.1759	30.9307
arahy.8DF3UX	0.240057	0.567326	0.373379	0.263123	0.09616	0.251543	0.217768	0.352256
arahy.7MRV43	8.31861	6.19465	8.32904	7.45179	9.66645	7.87148	4.8119	6.00696
arahy.KEB86C	1.87381	3.33818	1.66916	1.79331	1.59179	2.49509	1.13073	1.57931
arahy.CD0F2D	0.406193	0	0	0.0145469	0.326349	0.0708642	0	0.035307
arahy.L8FXMQ	5.1186	6.82149	1.73607	2.27934	5.21833	4.47548	2.22403	1.4197
arahy.Y5V9TA	0.419074	0	34.0868	40.1705	0.816657	0.204768	56.2886	58.6071
arahy.F9ZABX	0.086844	4.27754	0.78819	1.24195	0.422386	2.81697	0.968924	1.11378
arahy.7TZU8P	0	0	0	0	0.165578	0	0	0
arahy.3LD4UL	0.778497	0.251834	29.2681	7.63235	1.34659	0.623166	24.9977	5.67353
arahy.PF16ZL	0	1.13846	0.341231	0.239221	0	1.54979	0.151184	0.825712
arahy.AB0R82	0.0376054	1.02894	1.45806	0.837052	0.19899	0.775465	0.881817	0.642668
arahy.PFVK4Y	11.2625	13.9565	23.3974	18.7169	11.1696	15.5775	19.3364	19.9173
Novel01575	0.0413524	0.18403	1.4023	1.94403	0	0.0262034	0.81981	1.74125
arahy.J8KP6L	2.30098	17.1486	5.7819	9.26513	2.2883	11.3041	9.32735	7.12844
arahy.B2FMMM	7.79568	13.3184	9.24382	7.76575	8.64881	12.598	8.68671	8.23153
arahy.M7MYIY	0.177149	1.91947	1.75698	1.85329	0.265247	1.97488	1.84241	1.96539
arahy.6S8N9S	0	0.948306	0.531351	0.63749	0	0	0	0
arahy.228WZM	17.9963	6.6983	10.9756	10.2684	22.7598	10.7702	10.117	7.18668
arahy.I9WHAY	64.2201	20.8851	21.4672	15.0142	48.3096	33.1869	26.216	15.2785
arahy.SINK2Z	16.986	16.2344	10.9407	9.31435	16.515	15.5169	10.5821	7.67672
arahy.Q54RCI	2.24551	1.60342	0.792974	0.862352	1.0395	0.995363	0.483767	0.320619
arahy.2KD02W	0	2.09623	1.2009	0.893106	0.163294	1.26288	1.59751	0
arahy.ZBN808	1.56452	1.78071	0.11176	0.613879	0.481641	0.50197	0.420732	0.580013
arahy.S9WJEL	0	1.92301	0.34272	0	0	0.0169031	0	0.120347
arahy.W5FEYZ	0.224845	9.73771	1.0518	0.25517	5.92482	0.275748	0.187547	0
arahy.CECC7V	4.67613	2.73451	1.92547	1.43045	5.55808	1.18929	0.976504	0.195724
arahy.Z3AX4S	0.0750034	0	0.191134	0	2.30497	1.894	3.90171	0.365854
arahy.RCMT0A	0.287915	0	0	0	0.29426	0.0162437	0	0
arahy.1K1DUM	0.0491091	0.567488	0.191446	0	0.0693427	0.360767	0.0405661	0
arahy.S7389H	8.35435	10.4814	6.22813	4.37052	6.9893	9.28284	7.10653	3.63391
arahy.FQK2BJ	0.370487	2.00119	1.16692	0.854822	0.802523	0.679864	0.378617	0.973416
arahy.XP8I2L	0	0.080115	0	0	0	0.583603	0.118954	0
arahy.YRN4PU	4.18716	0.24917	0.0712004	0.0333954	3.86862	0.251073	0.222941	0.023876
arahy.9PBB9R	0.236709	0.808682	0.657129	0.45783	0.362131	0.708158	0.583073	0.519497
arahy.26WN5G	0.969956	1.52589	1.02665	0.726619	0.793482	1.6155	0.667117	0.481876
arahy.X5SRIL	34.1331	4.15689	11.1565	4.22647	157.531	4.39653	14.8839	2.89225
arahy.M94QCZ	3.08244	5.4687	2.54667	1.60507	1.73412	4.61569	2.54312	2.10313
arahy.62DI5E	0.197328	0.405564	0.31795	0.129258	0.0952367	0.342324	0.19022	0.0577197
arahy.EE81AI	8.04345	17.3469	7.19624	6.89942	7.01862	11.7056	8.17462	6.07683
Novel01835	2.81574	10.2083	3.04659	4.41901	2.02001	7.08085	4.08007	3.83739
arahy.JSZB3T	20.6748	10.0212	9.84913	7.54865	22.1517	14.1959	7.59805	6.22282
arahy.C7YTVY	0.0378667	0.0896855	0.0992175	0	0.683935	0.118062	0.0312795	0
arahy.2B8833	0.995586	1.32508	1.95886	1.48178	1.72386	3.47404	1.11384	1.26169
Novel00169	0.764845	2.98498	1.44299	1.23627	0.574854	1.85626	0.726525	1.21326
arahy.FM6Y9Y	2.11832	5.37955	5.35084	4.07173	2.21267	5.72047	4.99348	3.49778
arahy.TBV1EQ	1.73466	6.16199	4.21051	2.48345	1.36461	5.86217	4.37345	3.02267
arahy.879M1U	7.82364	14.0472	6.02715	4.17507	8.55336	12.4749	7.16843	3.76284
arahy.YI4799	1.82931	3.3321	1.96296	1.22672	1.35058	6.8331	2.35372	1.20146
arahy.ZJ433C	62.2752	35.1488	27.5214	20.471	53.5421	39.9365	22.9918	19.3409
arahy.CFS3CL	0.819643	2.94798	0.679631	0.076518	1.01179	4.4167	1.32134	1.0394
arahy.SLE1RG	7.24887	18.0893	6.7542	3.39417	5.02896	13.462	6.13966	4.23749
arahy.4W1HTH	0.124405	0	0	0	0	0	0	0
Novel04136	10.5279	21.0301	11.8991	10.3066	8.05235	17.3048	10.6033	8.58682
arahy.9Q598E	0	2.58541	0.340185	0.0544474	0.204578	1.34151	0.40554	0.0503398
arahy.15MU7G	9.76293	9.85542	7.16373	5.12384	10.7519	9.57383	6.13895	5.19379
arahy.R2I5HX	0.347533	0.25659	0.452805	0.469703	0.881682	0.280649	0.702245	0.928669
arahy.XC2JTE	0.943304	9.39202	3.42261	2.90667	0.774627	6.56389	3.51659	1.96061
arahy.T53XC3	15.3844	10.4368	5.55174	3.34805	12.7838	9.5575	5.51549	4.01675
arahy.7Y3SM7	60.955	110.826	20.7982	16.0113	24.0375	61.9926	22.6777	14.5745
arahy.NBHN08	0	0.0538684	0.273263	0.0397781	0.111393	0.365232	0.0921708	0
arahy.00JV9G	57.9556	7.89571	1.95993	0.18165	49.5787	5.21836	1.15721	0.266311
arahy.07WNF7	3.74172	9.87388	4.10056	4.39454	3.48115	10.0344	5.1806	3.89586
arahy.779HWZ	4.38728	4.83596	5.12133	4.53125	5.57386	6.13861	5.07876	4.44391
arahy.B7HYSM	3.11124	15.4109	2.91454	3.24017	2.79595	8.63011	2.11653	2.91457
arahy.P7R2PY	0.640418	0	0	0	1.6525	0	0	0
arahy.HIWA31	13.8847	3.13826	5.45029	4.03879	10.3223	4.61474	4.64324	2.75934
arahy.TJ3PHW	6.7322	46.721	16.4258	4.47665	8.1269	59.8942	13.5441	3.48194
arahy.6FVV8P	0.290171	13.0516	3.58488	3.43397	0.551568	11.0805	3.4903	2.14804
arahy.FXT8IT	40.5925	23.9462	17.5573	12.9816	30.2597	22.4141	16.6077	11.4287
arahy.V0ZW9L	0	0	0	0	0.118219	0	0	0
arahy.S5D643	1.0078	2.91265	1.27387	0.912059	1.0005	2.49101	1.56452	0.798077
arahy.X978JA	11.0369	1.43597	2.80551	1.92792	8.61027	2.92551	2.93777	1.57729
arahy.92IF5I	17.8211	1.63531	6.30942	0.594355	26.5644	3.33067	2.42967	1.03056
arahy.AJ1Q9U	3.0636	7.70338	10.8947	8.08902	7.19055	12.6799	10.4127	5.79971
arahy.Z700ZP	0.251605	3.07906	2.7774	1.12642	0.87547	3.99513	3.56907	1.34127
arahy.YK9IP3	2.11392	7.1573	5.63647	4.57648	2.91146	7.42235	5.96416	4.2159
arahy.XEQF22	0	0.136333	0.0525994	0.0166018	0.0104085	0.483394	0	0
arahy.HZCX8J	1.25417	14.4183	26.5978	18.6153	1.56915	5.40938	27.7806	18.223
arahy.LHTL6D	5.2554	0.577352	3.36338	3.84719	6.46138	9.79795	0.215549	0.554172
arahy.XWZQ7T	21.1352	6.95943	4.66335	4.17559	18.5628	7.59933	5.26564	3.17013
arahy.11HRG0	1.01827	9.04884	4.8442	3.0406	1.59139	8.65455	4.36111	2.65951
arahy.J1JEGY	11.5931	28.6162	13.8515	8.20228	10.5299	21.7662	12.9123	9.38094
Novel04984	1.6132	2.52654	2.31684	0.431506	1.73206	3.58405	1.39107	0.454084
arahy.7CR4HZ	0.0497269	0	0	0	0	0	0.342284	0.149563
arahy.XIU4QN	0.857022	0	0	0	5.2818	0	0	0.122077
arahy.BQ3MLV	98.4434	50.9633	39.1342	18.6276	72.5257	48.1666	41.1063	20.9345
arahy.0G4LNA	2.41624	5.67279	2.29735	2.01539	1.9163	4.51556	3.76261	3.33124
arahy.V132LN	0	1.59235	0	0	0	1.45645	0.0411541	0
arahy.UW2YW6	3.79825	8.73748	4.81517	4.3808	3.30929	6.44696	4.12893	4.94387
arahy.1P8XK5	1.80107	5.22132	1.22875	1.34316	1.84893	3.66658	1.9932	1.1116
arahy.BVQE0A	0.0359397	0.0386887	0.0228967	0.0355178	0.561975	0.0978132	0.0682055	0.039979
Novel00858	0.0261288	5.31	1.0423	1.00003	0.366611	3.39402	2.06472	1.12361
arahy.1WCS7I	2.5991	6.94463	6.75912	3.14557	2.36149	10.5996	132.891	3.78554
arahy.58ZGJB	5.02819	63.7576	19.996	17.5419	10.619	29.434	22.2662	10.6641
arahy.BI5KXL	0	2.80267	0.427436	0.772812	0.345923	0.94728	0.915731	0.471836
arahy.E6VM83	37.6847	1.57019	1.09088	2.0343	44.0062	2.5776	1.70971	1.11818
arahy.I8BJZC	1.68125	3.0965	1.66743	2.31021	1.13051	2.76402	1.90033	1.2638
arahy.47NS3A	12.3752	5.32798	18.905	41.5922	25.9066	6.62214	9.19307	13.9126
Novel03264	0.103109	0.203879	0.0576742	0.052455	0	0.0136366	0	0
arahy.LS23Q4	2.83462	0.0354304	0.158539	0.0389534	6.47277	0.113144	0.132276	0.054918
arahy.ZEZH97	0.343143	0.253653	0.445265	0.349778	0.262361	0.0330806	0.164652	0.141565
arahy.VZQ4XE	26.4497	48.9425	25.4255	18.6025	23.1517	44.3796	25.3093	22.2506
Novel02667	0.521813	0.829279	2.28349	1.98891	0.420259	1.49258	0.726264	0.948934
arahy.PY7LAP	5.13798	0.516524	0.384772	0.0759571	8.22163	0.333727	0.117169	0.251723
arahy.LAWA8U	0.118132	0	0	0	0.100596	0	0	0
Novel01432	2.23821	4.28407	6.12463	7.01611	3.47675	9.06877	4.98559	2.80384
Novel04498	0.793974	2.00664	0.802316	1.74614	0.549108	2.30049	1.18154	1.51885
arahy.BNJ0D6	0.636738	2.05805	1.04238	0.736458	0.599947	1.89686	1.07556	0.736788
arahy.2HX679	0.0248478	0.272263	0.0926537	0.028088	0.0151581	0.0666031	0	0.0373672
arahy.6C0LG0	3.57232	6.48593	6.67209	3.82087	7.32875	8.46048	6.31865	3.98276
arahy.AZZ8MP	0.404726	1.73689	0.413269	0.184328	2.46803	8.34312	4.88416	3.83423
arahy.2M7N28	1.27379	0.28905	0.693625	0.171474	0.541435	0.242778	0.462443	0.319431
arahy.PRFK83	2.12371	7.0154	3.66506	2.07207	4.82864	6.3614	4.24195	1.71753
Novel00001	0.741867	5.43261	1.64465	2.34623	0.172415	0.0275373	0.029183	0
arahy.E4IRCP	6.26235	20.7536	10.6491	12.2084	4.4296	19.935	14.2826	12.5591
arahy.JCHF8R	3.13162	0.0946892	0.0879103	0.0207032	3.77822	0.116933	0.117167	0.0639949
arahy.0UZF17	0	0.0237364	0.0405388	0	0	0.0888846	0.044309	0.161333
arahy.86SZEE	1.57104	10.4014	6.03782	4.40792	1.50055	7.47658	4.94837	3.30233
arahy.8610MV	3.16038	3.76336	2.1855	1.80461	3.37848	2.4923	1.38455	0.924689
Novel03644	0	0	0.093682	0	5.18547	6.71673	3.3807	2.92813
Novel04246	3.99378	2.72288	0.836065	0.664204	2.45985	3.19386	1.58145	0.994628
arahy.JZY96Q	2.11351	6.72888	3.78825	1.69928	1.93683	7.58867	3.74164	3.05509
arahy.QB4P8A	6.93787	7.4249	2.46571	1.97135	7.56633	6.59206	3.19	1.33657
arahy.F3IAW8	2.80977	3.28244	2.48179	1.40525	2.44535	3.21332	2.90481	1.62142
arahy.20VADI	0	0.17934	0	0	0	0	0.266282	0
arahy.3ZGL1M	20.8306	99.945	57.9841	29.1638	25.5436	127.645	91.2512	55.9045
arahy.IJ0BZH	0.788897	5.17934	4.0008	4.9459	0.604566	3.68107	4.07705	3.34204
arahy.WDB61R	0.813334	22.9902	5.69847	6.65506	2.01034	21.7174	6.77131	6.26516
arahy.GI9T10	0.00962152	0.333871	0.274282	0.0342003	0	0.16678	0.0515537	0
arahy.ZASA6B	2.11028	3.7112	2.31067	0.838623	1.23929	4.37058	2.88299	1.04788
arahy.T4BBUF	1.50366	5.92441	1.98928	1.47763	1.05146	4.66952	2.59989	1.33225
arahy.YMK2U2	0.081662	0.332654	0	0	0.0403963	0.15412	0	0
arahy.DHW1RD	3.48621	18.0284	15.9923	10.8115	3.1776	15.8831	13.261	11.2474
arahy.5590XE	6.67568	3.9749	3.31019	2.28652	14.6194	12.3557	7.56786	5.56092
arahy.6VWH1Z	0.5102	0.704258	0.952161	0.401438	0.359677	0.675578	0.247231	0.315643
arahy.C6SH89	4.61532	9.65769	7.55221	2.54063	13.8434	14.5947	5.64133	2.35021
arahy.NR23UA	3.03702	1.66696	1.77442	1.40256	3.2408	2.55536	1.9454	1.79315
arahy.I0BTND	2.49748	4.18536	5.00579	2.76006	2.75491	6.36771	5.23512	2.27396
arahy.DG3Y9L	0.0728045	0.128867	0	0.141681	0.0444136	0	0	0
arahy.093KP0	6.49801	15.8324	17.3262	15.7631	9.0898	23.2472	17.7157	16.838
arahy.II0HQF	14.7564	2.97255	4.20325	4.85875	23.9663	10.951	6.2331	2.48923
arahy.J94639	4.10359	4.53068	2.51287	2.22016	2.82189	3.96637	2.41219	2.20913
arahy.XNR1AK	29.8852	28.9587	36.2677	22.7224	21.4667	50.5447	22.6505	13.4571
arahy.85D0GY	3.0723	6.43783	3.50125	2.8519	2.82223	4.9909	3.43289	3.24793
arahy.DMYH1R	0	1.61459	0	0	0	0.849876	0	0
arahy.KW6J5Q	12.2657	9.36145	4.0106	4.37264	13.8503	7.66473	3.58988	4.64644
arahy.M3AF87	0.757815	0	0.10944	0	2.39464	0	0	0
arahy.ER1HM3	0.463174	0.465744	3.52431	3.53698	0.880368	0.58958	2.88898	4.31064
arahy.YSI1NX	0	0.311927	0.205911	0.0519025	0.0482319	0.093978	0.0379277	0
arahy.ZQ3F6U	0.558192	5.87081	0.797339	0.106896	1.87046	6.02807	1.07228	0.0672013
Novel04728	2.16997	6.08513	2.7434	2.16357	1.59897	4.14011	2.87005	1.76256
arahy.RV60AQ	0	0.748319	0	0	0	0.590414	0	0
arahy.3RGS9M	12.9467	0.0613816	0.017472	0.0261334	11.8497	0.0439481	0	0
arahy.81TW8H	11.9426	9.46912	6.32425	3.36098	8.59489	9.30071	8.16574	4.29572
arahy.E5SHJP	0	0.142687	0.111917	0	0	0.030475	0.0397272	0
arahy.GETR6D	18.5497	0.568024	1.00182	0.581477	15.7369	1.21028	0.977703	0.811774
Novel04096	44.7769	17.9716	23.8223	20.4195	36.1966	15.0128	16.4598	24.6411
arahy.GDDA1J	0.0754678	11.1049	1.36138	0.154543	1.03154	8.85445	2.02283	0.189204
arahy.YD44XK	0.167014	0.237946	0.230784	0.236973	0.101572	0.379428	0.304269	0.502261
arahy.F92SL8	17.2119	21.7989	11.4891	7.94719	14.0407	20.1132	12.592	8.3986
arahy.VVHX2K	0.720297	0.0934448	0.0437414	0	0.827602	0.153331	0.0325906	0
Novel03022	5.34648	2.82935	4.65463	4.30574	0.557799	0	0.0888592	0
arahy.FTL8EY	10.3508	15.3664	10.9287	9.61122	7.09033	13.4212	9.28881	10.099
arahy.5FW7UK	0.119801	13.8669	9.23995	6.61923	3.13225	19.4047	16.7652	11.6289
arahy.3C89HC	115.068	63.7002	53.4026	53.9219	88.7821	63.7759	57.4417	55.592
arahy.SWS7SX	0.162353	0.0961311	0	0.045881	0.139382	0.177541	0.0335275	0
Novel03880	0.393773	1.60994	3.23206	1.2402	0.0432197	1.44341	0.741275	0.319631
arahy.G65HTE	150.41	47.0343	56.3603	19.7248	100.139	50.0519	40.5	24.4881
arahy.SA4FWZ	10.2906	9.18984	6.27611	4.81851	12.4733	10.4756	4.02887	5.073
arahy.8447Y8	0.0431288	0.225474	0.132913	0.0390214	0.836191	0.154383	0.132806	0.157592
arahy.67ZR0E	5.91271	21.761	9.49919	11.5908	6.86563	16.3894	13.1109	9.96412
arahy.TB3UR8	0.106531	0.129457	0	0	0.0441156	0.252026	0.0480542	0.492146
Novel02419	3.23717	2.54321	16.7003	38.6839	6.60214	3.9211	12.066	18.4386
arahy.FKJ1CZ	8.7035	0.579366	0.331657	0.542054	10.0911	0.58974	0.259162	0.069796
Novel01804	1.35719	4.95929	2.04943	0.964213	3.19648	3.2563	1.56984	2.30714
arahy.V16S4V	0	0	0	0	0.109235	0	0	0
arahy.8YE7LP	1.13213	9.64168	5.83276	1.59578	3.24749	12.3897	5.24425	1.07868
arahy.D7MP66	0.207836	0	0	0	0	0	0	0
arahy.ZP3GRT	0.856559	0.118762	0.182773	0.201275	0.261843	0.0284526	0.261319	0.054895
arahy.I5G2IR	0.696465	0.0194916	0.183526	0.193084	1.02624	0.0139557	0.12128	0.0935455
arahy.4A1W4F	0.568528	1.00909	0.144315	0	0.308066	0.761115	0.174351	0
arahy.9SI57B	15.2318	8.3129	4.40243	3.57084	13.334	8.14407	5.44394	3.82364
arahy.Q9GEU7	4.50843	21.3051	10.7464	11.2141	5.22046	15.5317	12.8412	12.0656
arahy.12WCBU	0.536636	1.42381	1.83309	1.05447	0.741571	2.68416	1.89821	1.62685
arahy.FRUA2D	0	0.20003	0	0	0	0.0389587	0	0
arahy.JR6N4B	1.93347	12.2002	2.18001	2.18796	3.35824	11.5853	3.69149	2.6724
arahy.4NL1XF	1.55756	0.198793	0.0634333	0	4.41157	0.752686	0.0693328	0
arahy.D17V0C	0.358328	2.82077	1.70733	0.691327	0.622412	2.59432	1.57522	0.764656
arahy.KPU76V	14.7039	10.0617	6.14647	6.19265	11.152	7.03053	6.37306	5.20348
arahy.3B9B5X	1.16631	0.908362	0.959024	0.694485	1.04765	0.699443	1.17674	0.321358
arahy.UB0XN1	0.145911	1.7349	0.656563	0.680863	0.047406	1.93524	0.695825	0.0678668
arahy.PXX6WP	2.28668	3.72052	1.56619	1.22164	2.00633	2.78336	2.52832	1.13739
arahy.TM123A	3.18471	2.70129	0.884044	0.872467	2.66864	3.98447	1.10847	1.03076
arahy.EB1MMR	10.2763	10.803	6.87243	6.64174	9.6638	12.8995	7.0379	5.50907
arahy.XWQI9I	0.949699	4.45057	2.35215	1.51033	0.282066	0.179356	0	0
arahy.292F09	0.0708608	0.0508539	0	0	0.06036	0.239437	0.41135	0.259235
arahy.MJ9BA4	0.0274727	0.146462	0	0	0.0338449	0.0287872	0.023655	0.0161509
arahy.QLKH66	5.68574	31.8595	5.57924	0.846119	6.37258	23.7897	3.45326	0.177849
Novel02280	0.189143	0.167922	0.400702	0.218309	0.842344	0.0759831	0.236866	0.259457
arahy.NJSK03	8.74094	15.5308	8.80298	9.19935	8.99562	14.1882	8.22014	7.56372
arahy.6SN89Y	0	1.96248	0	0	0	3.36507	1.1774	0
Novel00404	1.25088	2.00083	5.1585	4.40737	1.13375	4.3382	3.15319	2.18866
arahy.RBTF4J	0.635322	2.72535	1.60133	1.84062	1.0637	1.98327	2.13795	1.16073
arahy.YNCC4F	0.219605	0.579366	0.279814	0.402595	0	0.138803	1.22575	0.488572
arahy.IE4XF6	13.7702	10.8332	10.3446	7.09629	10.5193	10.4037	11.6701	5.71694
arahy.QK4PF2	29.317	0.349728	0.151906	0	53.2614	0.656889	0.0889318	0
arahy.K2367J	0.163912	0.466678	0.428004	0.441766	0.0331956	0.195908	0.119854	0.163665
arahy.LZY7X8	0.0536766	0.778844	0.124909	0.313635	0.0491173	0.113483	0.133017	0.0807214
Novel00236	0.846648	4.47668	1.86063	1.65002	0.943823	3.77548	1.50386	1.63116
arahy.C0G4A3	3.5058	2.71593	1.85037	1.56997	4.09444	2.06321	1.61409	1.6189
arahy.BZ5ZMX	4.53535	1.2081	0.0925782	0.132307	5.21442	0.454268	0.140509	0.0993311
arahy.GX3496	2.26427	7.69436	2.37104	3.15164	2.79536	5.70358	2.82853	3.47739
arahy.EF75KU	0	1.9584	0	0	0	1.10392	0.112801	0.102679
arahy.DT6YRW	0	0.769034	0	0	0	0.0866797	0	0
arahy.G92E3R	0	0	4.96861	5.90056	0	0.0349866	0.653701	2.23298
arahy.EFB7JN	2.91328	12.9533	11.7335	7.48064	8.35107	11.9542	7.49225	5.5056
arahy.HBBK2U	0.0755344	0.583197	0.164007	0.0996032	0.763974	0.554432	0.161601	0.133857
arahy.B1CADF	0.0336814	1.61719	0.61736	0.407317	0.0465272	0.863976	0.538992	0.152929
arahy.R6MMNN	1.91607	2.36063	6.41474	3.71531	1.94494	7.99228	6.46416	3.40664
arahy.AW550S	9.83458	8.80676	6.59233	4.39629	12.4083	16.7809	7.8543	4.39899
arahy.SU6N3B	0.850152	0	0	0	0.459573	0.0256571	0	0
arahy.SS5QMW	0.85452	0.181282	0.378488	0.732134	1.6035	1.37855	0.582776	0.187328
arahy.BYX9LH	0.691617	2.91853	0.555328	0.0922648	0.602422	2.38158	0.475453	0.0276261
arahy.0XQ1R2	0.0403396	0.536538	0.0938732	0.307281	0.0492176	0.241818	0.255462	0.232006
arahy.8EAL4D	11.9664	12.5831	6.71742	6.59107	12.3955	10.7855	6.18046	5.50942
arahy.H93UBA	1.97366	0.101285	0	0	1.71993	0	0	0
arahy.40WTVA	4.71113	12.0305	4.97093	3.99389	4.34948	8.35324	5.94403	4.96996
arahy.XR3L42	5.36278	8.40906	5.60074	5.50846	3.81333	8.80454	6.63357	4.68999
arahy.Y59G7X	58.4338	102.933	60.7799	42.7169	72.5047	162.06	57.9476	34.4569
Novel00865	8.19594	2.89882	3.70537	2.93655	6.65457	2.28458	2.83934	2.32463
arahy.Y9S2IA	33.4564	29.2504	21.0021	14.2176	31.4406	26.3866	16.9571	11.8341
arahy.2I1UXC	6.25136	13.6777	5.29697	3.4688	4.67429	14.0199	5.7529	4.58613
arahy.ZBIL8C	6.48846	9.11038	5.95436	7.26938	7.04017	10.0987	5.54954	7.81771
Novel00745	1.86788	3.83743	5.89467	4.26475	1.67577	9.64418	4.34755	2.19889
arahy.6I3KXF	11.6142	17.054	12.0128	8.0875	11.3161	18.7628	15.487	13.5867
arahy.2GZ91X	3.74947	0	0	0	2.95201	0	0	0
arahy.Y86I8S	70.109	73.5656	55.6531	24.6027	79.9783	101.338	52.7143	14.9002
arahy.E07S37	4.6526	15.446	5.24909	7.442	4.15362	9.90095	6.75804	6.44283
arahy.E6HSDP	1.99081	3.96439	1.91362	1.52852	1.86099	3.47426	1.9441	1.19848
arahy.0PND55	0.0827347	0.844464	0.329203	0.351373	0.116763	0.828414	0.503395	0.443006
arahy.WZXK6X	29.4698	65.5228	19.2127	16.0383	26.3066	51.1314	27.2532	19.3146
arahy.L2LC7G	26.4173	39.5183	17.5756	7.14814	33.4782	39.8453	14.9922	5.26606
arahy.GIFS38	23.2057	37.9765	32.8061	28.7411	19.3832	36.921	28.6325	23.4813
arahy.FFKU3L	23.6867	43.2392	19.5963	14.1777	25.0107	40.267	22.3502	16.4903
Novel03273	0.0559085	0.336262	4.17557	4.48373	0.198184	0	2.94592	1.14706
arahy.SF2YP5	71.1861	65.4148	53.2517	29.2442	59.1934	74.3577	85.0699	28.4122
arahy.PDIL34	1.92173	34.1234	9.45344	20.8738	0.172089	1.49744	0.464157	0.0618318
arahy.W9XRJL	0.560923	0.896336	0.215996	0.22471	0.623208	0.762894	0.29026	0.445
arahy.7G2X2W	3.02473	0.998325	0.116614	0.0251689	2.18039	0.734301	0.169664	0.0289582
arahy.06QKUB	0	0	0	0	0.105209	0	0	0
arahy.P1GWNH	5.22228	2.47162	3.75473	1.86953	10.5325	3.68308	2.42376	2.16843
Novel04628	0.54823	1.79727	0.127708	0.0589552	0.278662	0.727223	0.100518	0
arahy.T4HC5L	31.1326	1.24506	0.551023	0.576279	69.5866	0.86828	0.861323	0.696114
arahy.2N5SYE	30.1691	145.393	70.0602	52.3613	26.8653	117.023	59.3606	43.8798
arahy.E8WGG3	1.39395	0.725662	0.107329	0.0204155	1.89266	1.11994	0.339745	0.066343
arahy.GD7L84	0.502456	2.54405	0.5731	0.378722	0.728312	1.04856	0.780765	0.708499
arahy.Y8MVFP	0.268195	0.123375	0.229359	0	0.19948	0.18983	0.106862	0.0833819
arahy.V8VQR4	15.7321	0	0	0	42.1693	0	0	0
arahy.TEXQ7Y	0	0.25553	0	0	0	0	0	0
arahy.YVA47Q	0.0633539	0	0.04788	0	0.156007	0.0987635	0	0.0952745
arahy.94TNN4	0.204	6.05332	0.997803	0.307393	0.39311	3.13338	1.41838	0.501654
Novel04116	0.946975	0.719092	1.02464	0.401309	0.292526	0.985343	0.0973829	0.0590967
arahy.RQY58A	0	0	0.758797	0	0	0	0	0
arahy.3X9B1A	39.1275	29.8374	44.791	22.0802	36.0056	48.4609	47.6571	30.2392
arahy.45IBUQ	5.80106	17.0355	9.88477	9.93075	5.30428	12.6334	8.27862	10.6809
arahy.M0G0AJ	1.46034	10.2787	3.61632	6.03432	1.6446	9.79941	5.85236	4.53225
arahy.7MA0TG	1.33443	4.49066	1.96957	1.39615	1.28652	2.82128	1.57311	1.47405
arahy.TS08QV	1.37505	0	0	0	0.721	0	0	0
arahy.AC6B4W	10.672	12.0444	8.05233	4.46336	14.2456	16.6653	7.85477	4.51578
arahy.5M71YA	0.791322	4.77891	1.74697	0.920716	0.681408	4.41553	2.56157	0.440032
arahy.97F800	9.90721	13.3687	10.5634	6.04118	7.42276	15.3083	7.70026	5.03652
Novel04127	0.884378	2.49128	7.60751	1.87679	2.07887	3.94683	7.06433	4.44154
arahy.63G0GZ	1.44265	3.13234	2.49957	2.75562	0.998252	4.21064	2.3761	1.98333
Novel03243	0.903233	2.44674	2.21629	2.05612	1.1671	2.4785	2.28008	2.66069
arahy.2SA5CU	0	0.0620346	0	0	0	0.371458	0.308774	0
arahy.YBC12K	2.96907	5.13199	7.0467	5.49275	1.88222	4.78163	4.5787	3.13926
arahy.19AV4I	30.4259	15.7306	8.30776	6.5925	23.6464	16.6297	8.52452	6.8119
arahy.Y5SS6T	21.2961	21.8134	37.0843	31.046	15.4598	22.836	35.3343	30.586
arahy.XAY6FB	2.87762	9.24084	4.37157	4.32308	2.84705	8.57163	5.03337	4.7665
arahy.P1TNN8	0	0	0	0	0.225811	0	0	0
arahy.AVLK1T	0.0427382	1.39155	0.936244	1.72385	0.149183	2.07172	1.35323	1.21772
arahy.39EPPD	0.0320363	0.189288	0	0	0.0586303	0.231027	0	0
arahy.DTC7Y5	1.37354	0.094434	0.0658086	0.0661808	1.98402	0.227389	0.207789	0.0796351
arahy.B65556	20.5592	27.0751	52.9912	14.9321	19.2544	60.1832	28.1051	13.6141
arahy.68M7RQ	0.146418	0	0	0	0.243127	0	0	0
Novel01187	0.0477028	0.102703	0.119249	0	1.51144	7.78044	4.82464	3.21761
arahy.E6VW7Q	0	0	0	0	3.24975	0	0	0
arahy.H3HGUT	1.40142	4.30603	8.21219	4.8051	2.99161	5.11578	8.27195	6.61403
arahy.BT3P13	0.101952	0.195712	0.0784059	0.0266476	0.130479	0.0732401	0	0
arahy.2U0JEX	4.35722	0.0779038	1.09732	0.743892	3.85054	0.317709	0.79773	0.347446
arahy.3U4A0B	44.8758	12.8987	3.64194	2.00973	42.3066	12.024	5.74798	2.19328
arahy.5FH16S	0.721839	0.189511	0.104646	0.0670191	0.582678	0.444102	0.0847101	0.179233
Novel00647	11.4905	11.6625	7.95938	4.82131	15.3753	10.713	8.50813	4.79003
arahy.U0IXLW	0	0	0	0	0.342079	0.177663	0	0
arahy.C255DP	0.374542	0.299308	0.031758	0	0.853413	0.135668	0.105728	0
arahy.B65H15	0	1.92139	0.769337	0.600574	0.0383649	1.56296	0.792972	1.81279
Novel02955	0.0801883	0.735696	0.842274	0	0.35054	2.10316	1.37994	1.80563
arahy.MN60MU	0	1.68532	0.228143	0.208092	0.0557932	1.36017	0.553984	0.228618
Novel03719	8.41886	7.90077	4.53904	3.8864	1.0538	0.588955	0.176781	0.068969
arahy.14EYW3	3.17003	0.0527375	0.0268679	0	2.70349	0.060215	0	0
arahy.NQRV4U	0.459762	0.345909	0.402455	0.225637	2.48806	0.750338	0.354278	0.554305
arahy.B128UN	6.10996	21.2287	5.6154	8.66263	4.00021	11.219	4.60614	6.52201
arahy.0GV99G	0.0213426	0.0951841	0.0600701	0.099589	0	0.040832	0.106457	0.185302
arahy.338KFG	1.76927	0	0.0533198	0.0467962	7.14723	0.0679619	0.10593	0
arahy.63191C	0	0.461362	0.174628	0	0	0.0298753	0.434867	0
arahy.NSWK12	0	0	0	0.260968	0	0.282145	0.494784	0
arahy.V14QW9	0.693609	0.0325465	0	0	0.622489	0.16086	0.0151887	0.0504479
arahy.NBIC4D	39.4681	36.2212	15.4456	10.5195	29.3569	35.0142	12.3258	9.70041
arahy.78PHYW	0.0595469	0.0386429	0.103589	0.0769699	0.0469985	0.0910429	0.327934	0.167445
arahy.CC2QWC	16.4634	59.6824	39.8927	33.9244	19.4728	56.4846	44.6358	27.9575
arahy.5NK7V3	11.7621	10.9067	3.94226	2.7079	8.11272	10.5068	6.2515	1.48896
arahy.I4HYIQ	40.8751	23.2851	12.4531	8.82997	36.0981	20.512	11.7034	9.11821
arahy.LKJZ2T	0.390113	1.33147	0.579055	0.346238	0.0197515	0.736062	0.757745	0.363875
arahy.F9SXFF	0.207755	1.40348	0.27359	0.431556	0.472489	0.900996	0.312033	0.342788
Novel01051	6.58282	4.38661	3.13605	1.91844	0.267735	0.0980317	0.0266904	0
arahy.J3JZ4F	4.18955	0.0659203	0	0.0223687	6.5127	0	0	0
arahy.Q9ZI40	0.0126662	6.79517	2.28813	1.60005	0.092243	3.58703	1.1736	0.67608
arahy.XE555B	5.51242	0	0	0	5.06901	0	0	0
arahy.Q2RJE3	0.0997271	0.274811	3.37057	0.033906	1.10184	2.06456	3.79065	0.225536
arahy.GWL1KB	2.33564	7.28614	4.26847	2.78144	1.43071	7.27301	4.61827	3.22854
arahy.IKZ63P	2.21742	2.14858	0.955853	0.957295	1.70379	2.10583	2.37115	0.758411
arahy.S6UD8T	0.991276	0	0.0275111	0	0.578568	0.0230667	0.110249	0
arahy.Z6KLKQ	7.15967	0.162507	5.20847	5.17089	7.42276	0.5244	3.7796	2.76711
Novel01681	0	0	1.94597	0	0.116285	0	0	0
arahy.F22IQH	0.515461	1.98319	1.22636	1.10483	0.657706	1.38697	1.47777	1.0513
arahy.KN857F	1.62068	1.47958	0.640043	0.263323	0.959525	0.881771	0.416617	0.139512
arahy.TM2X2L	0.103219	0.244469	0.547077	0.434227	0.125935	0.30677	0.852569	0.566386
arahy.V0I5I8	2.1765	5.16645	2.57838	3.05411	1.98393	5.88445	3.36157	2.31507
arahy.SUKE0C	34.6395	36.7116	26.3604	26.1228	37.267	39.7597	30.4334	27.7284
arahy.R7Y0VJ	3.25504	3.02134	2.06123	1.39201	2.73328	3.35656	1.64393	1.80329
arahy.3R4QA9	23.1818	112.891	88.7233	54.4137	20.5409	157.431	81.6079	42.3388
arahy.GK2PEB	0	0.161979	0	0	0	0.555873	0.0215977	0
arahy.5KI8FH	10.7104	5.10843	7.05808	2.12943	5.63351	5.87068	4.8462	2.84652
arahy.XTU11X	0.101251	0.246225	0.25353	0.0853481	0.135391	0.021624	0.114582	0.193949
arahy.1B5LVB	0.214957	0.268564	0.0263467	0	0.0638005	0.189447	0.143985	0
arahy.X7U9J7	2.88101	2.83243	4.06422	4.36462	3.18948	5.46369	3.371	3.39774
arahy.79WGU4	12.5359	6.08924	4.11478	2.41386	9.23389	4.54266	3.7703	2.35882
arahy.ZI8FA8	11.6943	35.5001	33.7096	19.207	10.0249	38.6069	31.2471	22.3197
arahy.NQN9S5	8.35768	10.9838	5.62165	3.71114	9.41335	10.196	5.74137	4.61277
arahy.SQF377	0	0.113419	0	0	0.0979874	0.0387277	0.0301817	0
Novel01448	0.598512	12.4806	6.343	8.5494	0.243101	2.25676	1.66957	0.970795
arahy.Z8QNYX	0.144809	0.0640797	0	0	0.0883392	0	0.159476	0
[truncated: 51,435 more rows]
