# Supplementary material for: Global Transcriptome and Co-Expression Network Analyses Revealed Hub Genes Controlling Seed Size/Weight and/or Oil Content in Peanut
Source: Plants (Basel). 2023 Aug 31;12(17):3144. doi: 10.3390/plants12173144 (PMC10490140; doi:10.3390/plants12173144)
Supplement: Supplementary file 1 [file plants-12-03144-s001.zip › Table S3.xlsx]

## Sheet: Readme
Table S3 Information of stage-specific expressed genes in ZH16 and ZH6.

## Sheet: ZH16
GeneID	ZH16_S1	ZH16_S2	ZH16_S3	ZH16_S4	Stage with highest CS score	Highest CS score	TF Family	Functional Annotation
Novel02468	1.00163	0.375761	0.0741273	0	ZH16_S1	0.624852	zf-HD	--
Novel05084	107.749	8.10696	0.40665	0.290192	ZH16_S1	0.924761	zf-HD	--
Novel00248	2.9248	0.204315	0	0.237846	ZH16_S1	0.91868	zf-HD	--
Novel02361	42.9265	1.31822	7.41461	7.31815	ZH16_S1	0.827272	zf-HD	--
arahy.XUAL01	1.23077	0.427696	0.596114	0.0968005	ZH16_S1	0.515656	WRKY	WRKY family transcription factor family protein
arahy.CVA9UE	3.89113	0.0984417	0.320874	0.169238	ZH16_S1	0.917537	WRKY	probable WRKY transcription factor 48 [Glycine max]
arahy.G729YX	8.98551	2.00256	1.36479	0.817853	ZH16_S1	0.777134	WRKY	WRKY family transcription factor
arahy.TC7Y0P	3.80069	0.0692137	0.029552	0.0442018	ZH16_S1	0.981789	WRKY	WRKY family transcription factor
arahy.96XQBG	6.02036	0.134771	0.414547	0.225051	ZH16_S1	0.931142	WRKY	probable WRKY transcription factor 48 [Glycine max]
arahy.W56I62	1.61069	0.0777066	0.469891	0	ZH16_S1	0.708268	WRKY	WRKY family transcription factor
arahy.T5S8G4	2.34887	0	0.0127595	0.024208	ZH16_S1	0.989694	WRKY	WRKY family transcription factor
arahy.S25UJZ	11.6379	3.88541	4.0369	1.99533	ZH16_S1	0.653124	WRKY	WRKY family transcription factor
arahy.VPG7BH	2.35463	0.700021	0.740432	0.781574	ZH16_S1	0.668069	WRKY	WRKY family transcription factor family protein
arahy.R65J70	3.22502	0.0362565	0.057897	0.0233519	ZH16_S1	0.982048	WRKY	WRKY family transcription factor
arahy.77CZVH	0.292727	0	0.023433	0	ZH16_S1	0.919949	WRKY	WRKY family transcription factor
arahy.FZU8AD	2.91081	0.0199871	0.421168	0.0402879	ZH16_S1	0.855309	WRKY	WRKY family transcription factor
arahy.7E4BRJ	7.63708	0.117309	0.331841	0.209745	ZH16_S1	0.956549	WRKY	WRKY family transcription factor
arahy.D15G2D	4.18936	0.84446	0.181262	0.0644914	ZH16_S1	0.798428	WRKY	probable WRKY transcription factor 23-like [Glycine max]
arahy.5V6QPU	4.82601	0.626852	1.25192	0.304065	ZH16_S1	0.74059	WRKY	WRKY family transcription factor family protein
arahy.206U1W	0.350888	0.0367902	0.128152	0	ZH16_S1	0.634777	WRKY	WRKY family transcription factor
arahy.7TT8S3	3.11115	0.0578584	0.261742	0.291372	ZH16_S1	0.906346	WRKY	WRKY family transcription factor
arahy.GQZA4M	36.0543	7.83689	1.0929	0.130718	ZH16_S1	0.782637	WRKY	probable WRKY transcription factor 23-like [Glycine max]
arahy.ZEA1CF	13.4618	0.897854	1.59551	0.318336	ZH16_S1	0.881478	WRKY	WRKY family transcription factor
arahy.L6TRL0	1.2144	0.0122291	0.149643	0.0446846	ZH16_S1	0.876776	WRKY	WRKY family transcription factor
arahy.N8RR3Y	3.0118	0	0.304553	0.284721	ZH16_S1	0.89888	Trihelix	trihelix transcription factor GT-2-like [Glycine max]
arahy.0CU6GK	60.2432	0.113389	2.02212	1.26333	ZH16_S1	0.966434	Trihelix	trihelix transcription factor GT-2-like [Glycine max]
arahy.WDZX9F	123.355	11.4046	20.861	24.9995	ZH16_S1	0.797337	Trihelix	trihelix transcription factor GT-2-like [Glycine max]
arahy.076XKT	116.973	0.269883	3.01795	2.1314	ZH16_S1	0.9742	Trihelix	trihelix transcription factor GT-2-like [Glycine max]
arahy.6ZR463	66.9607	13.509	25.7275	24.0376	ZH16_S1	0.615782	Trihelix	trihelix transcription factor GT-2 [Glycine max]
arahy.89A9VD	3.77315	0.0784122	0.418851	0.574395	ZH16_S1	0.847768	Trihelix	trihelix transcription factor GT-2-like [Glycine max]
arahy.IGA88J	75.6507	14.0292	30.2658	27.1706	ZH16_S1	0.599927	Trihelix	trihelix transcription factor GT-2-like [Glycine max]
arahy.22G7N5	65.7739	0.223948	0.621722	0.06995	ZH16_S1	0.990548	Trihelix	trihelix transcription factor GT-2-like [Glycine max]
arahy.K6EU4R	92.2173	11.8139	16.544	19.7032	ZH16_S1	0.78634	Trihelix	trihelix transcription factor GT-2-like [Glycine max]
arahy.69G02P	4.1566	0.0837492	0.212199	0.263619	ZH16_S1	0.936578	Trihelix	trihelix transcription factor GT-2-like [Glycine max]
arahy.A4KSPL	3.74146	0.107272	0.918549	0.807096	ZH16_S1	0.754495	TRAF	ankyrin repeat protein
arahy.IXTP9E	3.19858	0.126469	0.241996	0.0947491	ZH16_S1	0.924343	TRAF	BTB/POZ domain-containing protein
arahy.HJ4XGR	5.95803	0.0755111	0.582806	0.483685	ZH16_S1	0.902181	TRAF	ankyrin repeat protein
arahy.Z47KWR	3.24028	0.753489	0.344638	0.698459	ZH16_S1	0.767462	TRAF	BTB/POZ domain-containing protein
arahy.4T73SR	3.75132	0.57388	0.197721	0.212997	ZH16_S1	0.847019	TRAF	BTB/POZ domain-containing protein
arahy.5BTP04	2.06137	0	0.177214	0.240283	ZH16_S1	0.883435	TRAF	BTB/POZ domain-containing protein
arahy.X6RF7Y	8.00934	0.0614355	0.209848	1.42537	ZH16_S1	0.822036	Tify	jasmonate-zim-domain protein 1
arahy.WAJ05F	77.4673	17.4556	5.35645	3.10918	ZH16_S1	0.774672	Tify	protein TIFY 6B-like isoform X3 [Glycine max]
arahy.IG3UT7	8.28143	0	0.119465	0	ZH16_S1	0.985574	Tify	jasmonate-zim-domain protein 8
arahy.5M7JWE	8.79812	0.88448	0.3017	0.309388	ZH16_S1	0.899469	Tify	protein TIFY 6B-like isoform X3 [Glycine max]
arahy.25PL5E	38.4841	12.5307	1.35475	0.309546	ZH16_S1	0.674391	Tify	divergent CCT motif protein
arahy.I4L3EJ	59.1942	4.35405	3.52313	1.46441	ZH16_S1	0.926445	Tify	jasmonate-zim-domain protein 6
arahy.CDP1KS	78.2696	29.5922	11.2072	6.40343	ZH16_S1	0.621919	Tify	protein TIFY 6B-like isoform X3 [Glycine max]
arahy.0AWF5M	87.3779	6.70871	13.101	6.13399	ZH16_S1	0.850065	Tify	jasmonate-zim-domain protein 1
arahy.P4WXL8	64.8651	0	0.180164	0	ZH16_S1	0.997222	Tify	jasmonate-zim-domain protein 8
arahy.76C240	7.21078	0.528047	2.89886	1.44909	ZH16_S1	0.597982	Tify	jasmonate-zim-domain protein 1
arahy.TPQ86D	54.9824	11.5202	1.32125	0.300082	ZH16_S1	0.790474	Tify	divergent CCT motif protein
arahy.A76KD4	88.5266	0.187099	0.199713	0	ZH16_S1	0.997744	Tify	jasmonate-zim-domain protein 8
arahy.NLIW19	55.1113	3.70947	3.78342	1.39685	ZH16_S1	0.931349	Tify	jasmonate-zim-domain protein 6
arahy.BH211Y	23.0715	2.54203	7.72346	2.92241	ZH16_S1	0.665238	Tify	jasmonate-zim-domain protein 1
arahy.W1F2QM	63.0463	5.61129	9.40172	5.05666	ZH16_S1	0.850876	Tify	jasmonate-zim-domain protein 1
arahy.8N8EX2	20.4864	4.77218	2.18036	1.8496	ZH16_S1	0.767056	TF	transcription initiation factor IIE (TFIIE) alpha subunit family protein / general transcription factor TFIIE family protein
arahy.153R27	5.29752	0	0	0	ZH16_S1	1	TF	K-box region and MADS-box transcription factor family protein
arahy.9ETY0Z	0.177636	0.0351987	0	0	ZH16_S1	0.801849	TF	myb transcription factor
arahy.DZR6VW	0.107106	0	0	0	ZH16_S1	1	TF	WRKY family transcription factor
arahy.469CUM	0.183599	0	0	0	ZH16_S1	1	TF	putative transcription factor bHLH086-like [Glycine max]
arahy.0GNU4R	0.939342	0	0	0.139371	ZH16_S1	0.851629	TF	MADS-box transcription factor 6 [Glycine max]
arahy.F2Y5QJ	0.332978	0	0	0	ZH16_S1	1	TF	transcription factor bHLH135-like [Glycine max]
arahy.79PBA1	2.33751	0.547988	0.207574	0.0510721	ZH16_S1	0.765568	TF	MADS-box transcription factor 6 [Glycine max]
arahy.L5Q3AX	0.108338	0	0	0	ZH16_S1	1	TF	ethylene-responsive transcription factor 1B
arahy.JE3RIW	0.126102	0.0558014	0	0	ZH16_S1	0.557488	TF	ethylene-responsive transcription factor 13-like [Glycine max]
arahy.DY9DHP	1.20214	0	0.0570317	0.0336186	ZH16_S1	0.952558	TF	putative transcription factor bHLH086-like [Glycine max]
arahy.T39577	0.338557	0	0	0	ZH16_S1	1	TF	myb transcription factor
arahy.I8XYVU	2.22019	0.818638	0.244463	0.249952	ZH16_S1	0.631277	TF	GATA type zinc finger transcription factor family protein
arahy.40EERC	78.511	1.99275	1.38864	0.255365	ZH16_S1	0.974618	TF	sequence-specific DNA binding transcription factors
arahy.NI5BDM	5.05551	0	0.100596	0	ZH16_S1	0.980102	TF	transcription factor ASG4-like isoform X1 [Glycine max]
arahy.JNTF40	1.02059	0	0.0381085	0	ZH16_S1	0.96266	TF	transcription factor bHLH25-like [Glycine max]
arahy.7NUE2D	0.352585	0.0384478	0	0.0422708	ZH16_S1	0.880112	TF	MADS-box transcription factor 1-like isoform X3 [Glycine max]
arahy.VQRD1F	22.1137	2.16774	1.45762	0.758878	ZH16_S1	0.901973	TF	transcription factor bHLH149-like [Glycine max]
arahy.DH6SQG	2.29207	0.804674	0.412633	0.190038	ZH16_S1	0.648932	TF	transcription factor bHLH123-like [Glycine max]
arahy.3S8P0L	22.304	6.21495	9.32195	8.33632	ZH16_S1	0.58205	TF	GATA transcription factor 12
arahy.KFP2BM	32.9309	13.4224	8.63233	6.1031	ZH16_S1	0.592407	TF	transcription factor SAC51-like [Glycine max]
arahy.QH7PRJ	0.110729	0	0	0	ZH16_S1	1	TF	B3 domain-containing transcription factor VRN1-like isoform X2 [Glycine max]
arahy.K3BVMJ	0.406688	0	0	0	ZH16_S1	1	TF	ethylene-responsive transcription factor 4 [Glycine max]
arahy.XXIH72	0.569844	0	0.121823	0	ZH16_S1	0.786217	TF	MADS-box transcription factor family protein
arahy.728DYV	0.362775	0	0	0	ZH16_S1	1	TF	PLATZ transcription factor family protein
arahy.TUK55Y	0.889114	0.175022	0.155635	0.15248	ZH16_S1	0.80315	TF	WRKY family transcription factor family protein
arahy.IYK5A5	0.58806	0	0.0737706	0	ZH16_S1	0.874552	TF	ethylene-responsive transcription factor 7-like [Glycine max]
arahy.U8RNLY	0.109114	0	0	0	ZH16_S1	1	TF	myb transcription factor
arahy.0E4ZKW	39.554	19.2858	10.9508	10.5058	ZH16_S1	0.512419	TF	transcription factor SAC51-like [Glycine max]
arahy.HAG9AR	4.61989	0.699968	1.74064	0.396237	ZH16_S1	0.623229	TF	myb transcription factor
arahy.RV7PTT	0.482887	0.0740456	0	0	ZH16_S1	0.84666	TF	ethylene-responsive transcription factor RAP2-7-like isoform X3 [Glycine max]
arahy.0C3LLN	0.510597	0	0	0	ZH16_S1	1	TF	ethylene-responsive transcription factor 3-like [Glycine max]
arahy.1J8Q1W	0.2934	0.108769	0.0309607	0.0231544	ZH16_S1	0.629279	TF	putative Myb family transcription factor At1g14600-like isoform X2 [Glycine max]
arahy.V1RYJK	24.0046	11.5221	4.18674	2.00792	ZH16_S1	0.520004	TF	transcription factor bHLH68 isoform 1 [Glycine max]
arahy.82B8SU	8.68743	0	0.228557	0.0312286	ZH16_S1	0.973691	TF	AP2-like ethylene-responsive transcription factor At1g16060-like [Glycine max]
arahy.PB6M9B	0.157566	0	0	0.0393539	ZH16_S1	0.750238	TF	transcription factor-related
arahy.ZTQN5A	0.258486	0.0576639	0.0293777	0	ZH16_S1	0.776917	TF	PLATZ transcription factor family protein
arahy.L80AHZ	0.244718	0.0452035	0	0	ZH16_S1	0.815284	TF	transcription factor
arahy.SBU0PK	4.56708	0.303015	0.33522	0.289243	ZH16_S1	0.926601	TF	MADS-box transcription factor
arahy.WP2NBW	1.30258	0.195066	0	0	ZH16_S1	0.850247	TF	K-box region and MADS-box transcription factor family protein
arahy.509QUQ	0.29638	0.0572671	0	0	ZH16_S1	0.806778	TF	MADS-box transcription factor 17-like [Glycine max]
arahy.2UCE3W	18.5977	7.80046	1.09447	1.4494	ZH16_S1	0.580568	TF	probable WRKY transcription factor 23-like [Glycine max]
arahy.L65DKI	0.104843	0	0	0	ZH16_S1	1	TF	ethylene-responsive transcription factor 1B
arahy.IEZ2LH	0.372951	0	0	0	ZH16_S1	1	TF	transcription factor RADIALIS-like [Glycine max]
arahy.DKZ1IG	10.9393	2.6146	2.53915	1.30464	ZH16_S1	0.760989	TF	transcription factor bHLH68 isoform 1 [Glycine max]
arahy.73QXIF	6.74918	3.22359	0.955987	0.599859	ZH16_S1	0.522373	TF	transcription initiation factor IIE (TFIIE) alpha subunit family protein / general transcription factor TFIIE family protein
arahy.X8IFE3	2.88268	1.43176	0.527724	0.239474	ZH16_S1	0.503323	TF	transcription factor bHLH68-like isoform X1 [Glycine max]
arahy.NL2IIL	0.366402	0	0	0	ZH16_S1	1	TF	probable WRKY transcription factor 51 [Glycine max]
arahy.W40KSR	0.592293	0.0497689	0	0	ZH16_S1	0.915973	TF	transcription factor bHLH35-like [Glycine max]
arahy.K09AJ1	0.110736	0	0	0	ZH16_S1	1	TF	trihelix transcription factor GT-2-like [Glycine max]
arahy.LCR0LC	0.368561	0	0	0	ZH16_S1	1	TF	ethylene-responsive transcription factor 13-like [Glycine max]
arahy.RZ4SGF	54.6072	0.497671	0.2685	0.0697566	ZH16_S1	0.990886	TF	sequence-specific DNA binding transcription factors
arahy.ES7II1	1.07258	0	0	0	ZH16_S1	1	TF	PLATZ transcription factor family protein
arahy.U9727D	0.593141	0	0.0815608	0.208171	ZH16_S1	0.649035	TF	transcription factor TCP2-like isoform X5 [Glycine max]
arahy.L104JU	0.164592	0	0	0	ZH16_S1	1	TF	myb transcription factor
arahy.3TU9DB	58.2243	12.1574	9.24897	6.81152	ZH16_S1	0.791197	TF	transcription factor BIM2-like protein
arahy.67QM1D	0.110013	0	0.018615	0	ZH16_S1	0.830792	TF	myb transcription factor
arahy.7WH0ZP	0.171256	0	0	0	ZH16_S1	1	TF	MYB transcription factor MYB127 [Glycine max]
arahy.MRL478	2.77089	1.23355	1.0322	0.344901	ZH16_S1	0.554819	TF	ethylene-responsive transcription factor 3 [Glycine max]
arahy.I0TH6U	0.529825	0.250272	0.0926537	0	ZH16_S1	0.527632	TF	transcription factor bHLH130-like [Glycine max]
arahy.7X505H	33.3889	1.11977	0.365064	0.162001	ZH16_S1	0.966463	TF	MADS-box transcription factor
arahy.303TEV	97.1841	41.1145	46.1793	23.3196	ZH16_S1	0.524827	TF	general transcription factor group E6
arahy.BHH2Q1	1.78852	0.0869375	0.158064	0.506518	ZH16_S1	0.716795	TF	WRKY family transcription factor
arahy.P38CZV	4.99895	0	0.212827	0	ZH16_S1	0.957426	TF	transcription factor bHLH25-like [Glycine max]
arahy.I00TLA	0.216385	0	0	0	ZH16_S1	1	TF	RNA polymerase II transcription factor SIII (elongin) subunit A
arahy.SKF7WC	0.142137	0.043208	0	0	ZH16_S1	0.696011	TF	transcription factor
arahy.AS021W	1.43726	0.511992	0.11375	0.234535	ZH16_S1	0.643771	TF	transcription factor bHLH123-like [Glycine max]
arahy.BC7D9W	9.17811	1.66903	2.47563	0.256742	ZH16_S1	0.730268	TF	transcription factor HBP-1b(c1) isoform X2 [Glycine max]
arahy.GDT5AY	0.722494	0	0	0	ZH16_S1	1	TF	myb transcription factor
arahy.7P630Y	0.406269	0.145781	0	0	ZH16_S1	0.64117	TF	MYB transcription factor MYB51 [Glycine max]
arahy.47Q1NW	1.67675	0.0136404	0.011648	0	ZH16_S1	0.991865	TCP	transcription factor CYCLOIDEA-like isoform X3 [Glycine max]
arahy.DG8AQJ	1.93739	0.0268103	0.0228943	0	ZH16_S1	0.986162	TCP	transcription factor CYCLOIDEA-like isoform X3 [Glycine max]
arahy.46V6T7	1.37196	0	0	0	ZH16_S1	1	TCP	transcription factor CYCLOIDEA-like isoform X3 [Glycine max]
arahy.N9U68C	4.30079	0.0529279	1.18892	0.48605	ZH16_S1	0.723556	TCP	transcription factor TCP2-like isoform X7 [Glycine max]
arahy.Q1RL33	1.2136	0	0	0	ZH16_S1	1	TCP	transcription factor CYCLOIDEA-like isoform X3 [Glycine max]
arahy.TU0X8W	2.19823	0.0283759	0	0	ZH16_S1	0.987091	TCP	transcription factor CYCLOIDEA-like isoform X3 [Glycine max]
arahy.18WYEQ	1.32924	0	0	0	ZH16_S1	1	TCP	transcription factor CYCLOIDEA-like isoform X3 [Glycine max]
arahy.0RI6JJ	19.7928	4.11718	2.36717	1.6216	ZH16_S1	0.791987	SRS	protein LATERAL ROOT PRIMORDIUM 1-like isoform X3 [Glycine max]
arahy.H1I1DS	3.52026	0.615181	0.647612	0.353399	ZH16_S1	0.816033	SRS	protein LATERAL ROOT PRIMORDIUM 1-like isoform X3 [Glycine max]
arahy.46KP2H	80.0115	34.0088	18.433	15.1327	ZH16_S1	0.574951	SBP	squamosa promoter binding protein-like 1
arahy.MVBZ07	35.9291	10.2303	0.156922	0	ZH16_S1	0.715264	SBP	squamosa promoter binding protein-like 3
arahy.5CG51V	67.2573	25.5742	15.5303	12.5644	ZH16_S1	0.619756	SBP	squamosa promoter binding protein-like 1
arahy.6HMZ07	54.7856	23.2059	1.97009	0.281057	ZH16_S1	0.576423	SBP	squamosa promoter binding protein-like 3
arahy.SYI62H	4.98329	0.756589	1.19491	1.24438	ZH16_S1	0.750289	S1Fa-like	receptor-like kinase
arahy.WAP6P7	5.71345	0.810625	1.18492	1.39422	ZH16_S1	0.755976	S1Fa-like	receptor-like kinase
arahy.V960AN	26.5456	0.535182	1.3369	2.18033	ZH16_S1	0.917865	Pseudo ARR-B	response regulator 12
arahy.A9G6ZW	61.1457	1.26974	1.76357	3.36717	ZH16_S1	0.944932	Pseudo ARR-B	response regulator 12
arahy.2F1UPX	13.0892	3.55382	3.68113	3.32962	ZH16_S1	0.718765	Pseudo ARR-B	response regulator 1
arahy.D90B1M	12.0419	3.23193	4.29299	4.59724	ZH16_S1	0.618231	Pseudo ARR-B	response regulator 1
arahy.GR8EZE	18.1229	2.0917	7.09204	5.32645	ZH16_S1	0.608671	PLATZ	PLATZ transcription factor family protein
arahy.JSN7JY	2.21909	0.457192	0.271628	0.162779	ZH16_S1	0.793973	PHD	protein strawberry notch-like isoform X1 [Glycine max]
arahy.C3DRVP	17.0465	5.85033	7.39878	8.3178	ZH16_S1	0.512051	Orphans	Signal transduction histidine kinase, hybrid-type, ethylene sensor
arahy.VDE0FL	41.5943	19.7661	7.05037	4.95347	ZH16_S1	0.524789	Orphans	probable sugar phosphate/phosphate translocator [Glycine max]
arahy.HNM84L	1.49371	0.0284799	0	0.0313117	ZH16_S1	0.979038	Orphans	zinc finger protein CONSTANS-LIKE 5-like [Glycine max]
arahy.K7XCE3	4.90365	0	0	0	ZH16_S1	1	Orphans	response regulator 24
arahy.22FLX8	4.1379	0.83673	0.198989	0.316288	ZH16_S1	0.797789	Orphans	zinc finger protein CONSTANS-LIKE 4-like [Glycine max]
arahy.EU8XRE	105.246	0.17771	0.356166	0	ZH16_S1	0.996616	Orphans	jasmonate-zim-domain protein 8
arahy.QP34EV	0.115777	0.0358461	0	0	ZH16_S1	0.690388	Orphans	zinc finger protein CONSTANS-LIKE 16-like [Glycine max]
arahy.UNUG60	2.49929	0.0842588	0.0858537	0.239775	ZH16_S1	0.904063	Orphans	CCT motif family protein
arahy.J72S78	12.438	0.947537	0.588686	0.535856	ZH16_S1	0.923819	Orphans	protein DA1-related 2-like isoform X4 [Glycine max]
arahy.8D9FYF	1.40632	0.241951	0.236859	0.445147	ZH16_S1	0.683467	Orphans	protein DA1-related 2-like isoform X1 [Glycine max]
arahy.9Y5DYJ	2.88168	0	0.0658091	0.106464	ZH16_S1	0.963055	Orphans	CCT motif family protein
arahy.Z3NZLL	4.01465	0.931889	0.430101	0.0204616	ZH16_S1	0.767878	Orphans	receptor-like protein kinase 2
arahy.04TCW6	9.85859	2.70968	1.14798	0.95713	ZH16_S1	0.725145	Orphans	response regulator 9
arahy.672M4G	2.78722	0.560852	0.502868	0.50335	ZH16_S1	0.798777	Orphans	Signal transduction histidine kinase
arahy.NK5JY0	28.4969	11.5344	9.28336	6.83061	ZH16_S1	0.595239	Orphans	Signal transduction histidine kinase, hybrid-type, ethylene sensor
arahy.W2V9C7	7.22982	2.6857	1.88776	1.62057	ZH16_S1	0.628525	Orphans	zinc finger protein CONSTANS-LIKE 5-like [Glycine max]
arahy.I7RWJW	4.41194	0.174191	0	0	ZH16_S1	0.960518	Orphans	response regulator 24
arahy.N2A79V	13.2389	4.47734	2.50798	0.611301	ZH16_S1	0.661804	Orphans	zinc finger protein CONSTANS-LIKE 13-like [Glycine max]
arahy.0MYI9I	20.9506	4.39059	6.12782	8.05512	ZH16_S1	0.615519	Orphans	Signal transduction histidine kinase, hybrid-type, ethylene sensor
arahy.E2UI1Z	10.8561	2.52965	1.25605	0.815457	ZH16_S1	0.766983	Orphans	response regulator 9
arahy.2H77W4	35.2066	13.9813	10.7488	7.50793	ZH16_S1	0.602879	Orphans	Signal transduction histidine kinase, hybrid-type, ethylene sensor
arahy.NK4UTA	42.5985	19.4599	9.97433	6.49131	ZH16_S1	0.543178	Orphans	zinc finger protein CONSTANS-LIKE 9-like isoform X4 [Glycine max]
arahy.UU73T8	4.07308	0.82571	0.749042	0.258282	ZH16_S1	0.797276	Orphans	zinc finger protein CONSTANS-LIKE 2-like [Glycine max]
arahy.64XMNP	1.0413	0.151763	0.14808	0.113699	ZH16_S1	0.854257	Orphans	protein DA1-related 2-like isoform X1 [Glycine max]
arahy.TFJ3CW	30.079	14.3862	7.5199	4.83537	ZH16_S1	0.52172	Orphans	zinc finger protein CONSTANS-LIKE 9-like isoform X4 [Glycine max]
arahy.ZRH25X	0.626985	0.0562639	0.0785886	0.0394305	ZH16_S1	0.874656	Orphans	zinc finger protein CONSTANS-LIKE 4-like [Glycine max]
arahy.79Y86V	8.80773	0.955711	0.41941	0.397341	ZH16_S1	0.891492	Orphans	protein DA1-related 2-like isoform X1 [Glycine max]
arahy.HFU6F2	3.89014	0.244789	0.355097	0.100566	ZH16_S1	0.908719	OFP	ovate family protein 11
arahy.4G75Y2	24.9936	0	0	0	ZH16_S1	1	OFP	ovate family protein 6
arahy.N32B4U	8.32767	0.0415036	0.248554	0.319873	ZH16_S1	0.961589	OFP	ovate family protein 11
arahy.1M8NR5	7.87959	1.1448	0.225313	0.131781	ZH16_S1	0.854713	OFP	ovate family protein 16
arahy.27Q2VK	4.28186	0.111068	0	0	ZH16_S1	0.974061	OFP	ovate family protein 6
arahy.5P3U81	0.388034	0	0.0472385	0	ZH16_S1	0.878262	NAC	NAC domain protein,
arahy.3F2LJ6	5.52483	0.455505	0.622452	0.267869	ZH16_S1	0.887335	NAC	NAC domain protein,
arahy.NB8KRW	51.2089	5.12686	13.7143	1.03896	ZH16_S1	0.732188	NAC	NAC domain containing protein 3
arahy.T50ENK	2.61974	0.795462	0.662949	0.632145	ZH16_S1	0.696358	NAC	NAC domain-containing protein 8-like [Glycine max]
arahy.1P6DI5	48.3385	2.62515	4.88727	2.24973	ZH16_S1	0.898895	NAC	NAC domain containing protein 47
arahy.YXGX3A	1.04617	0	0.0217922	0	ZH16_S1	0.979169	NAC	NAC domain protein,
arahy.83IFXD	48.0614	1.7097	5.17612	1.77299	ZH16_S1	0.892302	NAC	NAC domain containing protein 47
arahy.FKL2A7	0.630053	0.283041	0.094021	0.15142	ZH16_S1	0.550767	NAC	NAC domain containing protein 3
arahy.UX5JN7	4.40529	0.625183	1.31876	0.84883	ZH16_S1	0.700641	NAC	NAC domain-containing protein 8-like [Glycine max]
arahy.3G9MJD	2.27803	0.275492	0.303375	0.101716	ZH16_S1	0.866826	NAC	NAC domain protein,
arahy.9ZTQ0N	157.373	4.77675	23.7486	1.85731	ZH16_S1	0.849094	NAC	NAC domain containing protein 19
arahy.WULW7H	6.69784	0.407606	0.572458	0.187233	ZH16_S1	0.914531	NAC	NAC domain protein,
arahy.72Q128	14.3189	0.633275	3.86959	0.822425	ZH16_S1	0.729757	NAC	NAC domain protein,
arahy.0V68XN	3.75287	1.13027	0.731069	0.969777	ZH16_S1	0.698826	NAC	NAC domain protein,
arahy.8GCY61	3.9371	0.443747	0.464854	1.89522	ZH16_S1	0.518626	NAC	NAC domain protein,
arahy.798CQ8	1.30698	0.264123	0.123636	0.370478	ZH16_S1	0.716538	NAC	NAC domain protein,
arahy.RC5QY0	2.11189	0.421526	0.157268	0.0559517	ZH16_S1	0.800403	NAC	NAC domain containing protein 3
arahy.QZZL54	63.7578	2.04718	8.04839	0.794461	ZH16_S1	0.873766	NAC	NAC domain containing protein 3
arahy.R9WKT4	0.672808	0	0	0	ZH16_S1	1	NAC	NAC domain protein,
arahy.FU1JML	151.322	3.2337	14.2821	1.01774	ZH16_S1	0.905618	NAC	NAC domain containing protein 19
arahy.3N6K0N	21.0335	2.44944	2.96042	0.66044	ZH16_S1	0.859252	NAC	NAC domain protein,
arahy.C8ILII	5.9486	2.792	2.16925	1.33674	ZH16_S1	0.530646	MYB	MYB transcription factor MYB109 [Glycine max]
arahy.SU6N3B	0.850152	0	0	0	ZH16_S1	1	MYB	myb transcription factor
arahy.D9P3QC	0.490381	0.0416507	0	0	ZH16_S1	0.915065	MYB	myb transcription factor
arahy.E3E88W	0.830108	0.0269135	0.161177	0.14346	ZH16_S1	0.805836	MYB	myb transcription factor
arahy.04JNDX	30.8058	1.43958	5.34099	2.5201	ZH16_S1	0.826624	MYB	MYB transcription factor MYB51 [Glycine max]
arahy.WSM8QM	33.4826	2.42095	1.59624	0.513686	ZH16_S1	0.927695	MYB	myb transcription factor
arahy.DV7QWZ	49.1364	2.27535	8.48137	4.39778	ZH16_S1	0.827391	MYB	MYB transcription factor MYB51 [Glycine max]
arahy.2A56XJ	14.367	0.702904	0.618038	0.0933719	ZH16_S1	0.951075	MYB	myb transcription factor
arahy.RK8HN4	0.582788	0.0514522	0	0	ZH16_S1	0.911714	MYB	myb transcription factor
arahy.Y2L847	40.2548	2.32122	0.887889	0.416096	ZH16_S1	0.942337	MYB	myb transcription factor
arahy.4A4JN6	32.3449	11.8544	1.25589	1.1728	ZH16_S1	0.6335	MYB	myb transcription factor
arahy.UI5U2V	1.16107	0	0.0222963	0	ZH16_S1	0.980797	MYB	myb transcription factor
arahy.Q52RY2	3.52557	0.05625	0.295042	0.179685	ZH16_S1	0.916314	MYB	myb transcription factor
arahy.8CZ745	51.5523	6.44755	6.44906	6.17934	ZH16_S1	0.874903	MYB	MYB transcription factor MYB118 isoform X1 [Glycine max]
arahy.T82HCQ	34.6733	0.529321	0.410048	0.283728	ZH16_S1	0.984734	MYB	myb transcription factor
arahy.VB9WQ9	270.992	0.0432478	0	0	ZH16_S1	0.99984	MYB	myb transcription factor
arahy.X53HIH	4.79613	0.491365	0.287271	0.903863	ZH16_S1	0.811543	MYB	myb transcription factor
arahy.U64AY7	0.241817	0	0	0	ZH16_S1	1	MYB	myb transcription factor
arahy.HDQ65R	2.08278	0.890743	0.346764	0.0738233	ZH16_S1	0.572329	MYB	myb transcription factor
arahy.7LH3TR	5.96025	2.70096	1.14006	0.58041	ZH16_S1	0.546838	MYB	Pseudouridine synthase family protein
arahy.JGMV5U	78.1408	0.100152	0.121241	0.131356	ZH16_S1	0.998319	MYB	myb transcription factor
arahy.4B15T0	0.68636	0.0144696	0.0256901	0	ZH16_S1	0.962571	MYB	myb transcription factor
arahy.IX0GML	116.434	0.0245871	0.0419917	0.0314041	ZH16_S1	0.999639	MYB	MYB transcription factor MYB64 [Glycine max]
arahy.WVAI17	11.2542	1.39563	1.58829	1.59967	ZH16_S1	0.857861	MYB	myb transcription factor
arahy.3K6508	2.56963	0.0768682	0.130085	0.181236	ZH16_S1	0.92947	MYB	myb transcription factor
arahy.H626TW	1.76274	0.671095	0.66089	0.234654	ZH16_S1	0.619288	MYB	myb transcription factor
arahy.3F6TQT	36.9245	0.317097	0.771925	0.539052	ZH16_S1	0.979095	MYB	myb transcription factor
arahy.7MW9BK	5.84729	0.100763	0.20195	0	ZH16_S1	0.965463	MYB	MYB transcription factor MYB118 isoform X2 [Glycine max]
arahy.12J3VU	8.35058	2.24991	1.2744	0.151578	ZH16_S1	0.730569	MYB	myb transcription factor
arahy.3JX01Z	0.102074	0	0	0	ZH16_S1	1	MYB	myb transcription factor
arahy.I43UPL	21.535	0	0.0181624	0	ZH16_S1	0.999157	MYB	myb transcription factor
arahy.LHIJ83	1.88158	0	0.342583	0.190203	ZH16_S1	0.817928	MYB	MYB-like transcription factor family protein
arahy.9UC92R	5.37212	2.14643	0.26986	0.181116	ZH16_S1	0.600451	MYB	myb transcription factor
arahy.CDS96U	11.8403	0.456834	0.331733	0.291411	ZH16_S1	0.961417	MYB	myb transcription factor
arahy.PL301B	4.02694	1.34825	1.52444	1.15809	ZH16_S1	0.62144	MYB	MYB transcription factor MYB118 isoform X1 [Glycine max]
arahy.0KDF2J	4.4689	0.773638	0.26808	0.28365	ZH16_S1	0.826884	MYB	myb transcription factor
arahy.YHX78I	11.5198	4.83566	5.2131	2.65408	ZH16_S1	0.547466	MYB	vesicle-associated protein 4-2 [Glycine max]
arahy.6FS9GU	100.909	4.50022	4.86061	1.83724	ZH16_S1	0.951832	MYB	MYB transcription factor MYB114 isoform X2 [Glycine max]
arahy.85WIHV	104.307	7.05396	5.81885	1.88003	ZH16_S1	0.932373	MYB	MYB transcription factor MYB114 isoform X2 [Glycine max]
arahy.MB41E4	20.3234	0.371858	0.241689	0.392337	ZH16_S1	0.980695	MYB	MYB transcription factor MYB118 isoform X2 [Glycine max]
arahy.KP4VNB	34.7861	7.87622	8.10609	6.3882	ZH16_S1	0.766974	MYB	MYB transcription factor MYB118 isoform X1 [Glycine max]
arahy.RM3VXC	5.42037	1.02614	2.00801	1.98956	ZH16_S1	0.629544	MYB	myb transcription factor
arahy.C9M3KU	8.55651	2.04063	2.11743	0.18287	ZH16_S1	0.752535	MYB	myb transcription factor
arahy.BR8QN4	15.74	2.01723	1.47059	0.940671	ZH16_S1	0.871841	MYB	myb transcription factor
arahy.ZNIJ0J	22.445	0.266895	1.69595	0.628979	ZH16_S1	0.92444	MYB	myb transcription factor
arahy.S8NMKG	20.5083	2.21319	2.25193	0.813076	ZH16_S1	0.890194	MYB	myb transcription factor
arahy.6G7EGE	6.00832	0.666421	0.155172	0.108896	ZH16_S1	0.889084	MYB	myb transcription factor
arahy.H4RQ1I	0.149079	0	0	0	ZH16_S1	1	MYB	myb transcription factor
arahy.K4CW46	8.96908	0.639835	0.635096	0.431265	ZH16_S1	0.928662	MYB	myb transcription factor
Novel01229	64.3312	0.0488905	0.024908	0	ZH16_S1	0.99924	MYB	--
arahy.D7MP66	0.207836	0	0	0	ZH16_S1	1	MADS-box	K-box region and MADS-box transcription factor family protein
arahy.TZ3ZMM	3.73632	0	0	0	ZH16_S1	1	MADS	MADS-box transcription factor family protein
arahy.5R195S	9.04953	3.63971	1.30043	1.70865	ZH16_S1	0.5978	MADS	MADS-box transcription factor 6 [Glycine max]
arahy.MX0VEQ	147.276	0.175074	0.330125	0.753581	ZH16_S1	0.994883	MADS	MADS-box transcription factor family protein
arahy.PVA06P	90.2139	32.4732	31.9152	39.789	ZH16_S1	0.558948	MADS	MADS-box transcription factor family protein
arahy.XBYN1J	17.6639	6.65941	0.749076	0.215642	ZH16_S1	0.622994	MADS	MADS-box transcription factor family protein
arahy.IQR3N2	4.7508	0.418833	1.27141	2.03771	ZH16_S1	0.571081	MADS	MADS-box transcription factor 6 [Glycine max]
arahy.ITV0VK	65.5369	0.941247	0	0	ZH16_S1	0.985638	MADS	MADS-box transcription factor family protein
arahy.SC2RCC	142.148	0.51609	0.615776	0.450804	ZH16_S1	0.995668	MADS	MADS-box transcription factor family protein
arahy.NKL1UU	226.585	0.0306639	0.249965	0.0674259	ZH16_S1	0.998897	MADS	MADS-box transcription factor family protein
arahy.AK1FA2	8.87931	0	0	0	ZH16_S1	1	MADS	MADS-box transcription factor family protein
arahy.78PTZY	136.798	0	0.0259575	0	ZH16_S1	0.99981	MADS	MADS-box transcription factor family protein
arahy.D4F11K	95.6752	1.18246	3.17422	5.92657	ZH16_S1	0.938055	MADS	MADS-box transcription factor family protein
arahy.QB26WD	86.6114	1.74655	2.78776	5.73598	ZH16_S1	0.933773	MADS	MADS-box transcription factor family protein
arahy.D3LV4V	3.44617	0.107902	0.0986031	0	ZH16_S1	0.968689	MADS	MADS-box transcription factor 6 [Glycine max]
arahy.438FZB	16.0762	1.55551	1.87796	1.22274	ZH16_S1	0.883184	MADS	MADS-box transcription factor 6 [Glycine max]
arahy.WIWA1B	6.1944	0.949383	1.41268	1.78041	ZH16_S1	0.712578	MADS	MADS-box transcription factor 6 [Glycine max]
arahy.X3L1K4	2.14943	0.0788007	0	0.301946	ZH16_S1	0.859522	MADS	MADS-box transcription factor 6 [Glycine max]
arahy.QJDQ9C	1.4945	0	0	0	ZH16_S1	1	MADS	MADS-box transcription factor 6 [Glycine max]
arahy.SGD688	2.10587	0.390457	0.0614729	0.203829	ZH16_S1	0.814587	MADS	MADS-box transcription factor 6 [Glycine max]
arahy.QQ4618	180.603	0	0.0529736	0	ZH16_S1	0.999707	MADS	MADS-box transcription factor family protein
arahy.6JWN9E	22.5547	3.29341	4.23811	3.22532	ZH16_S1	0.812096	MADS	MADS-box transcription factor 6 [Glycine max]
arahy.SJTD5W	1.25899	0.138406	0	0	ZH16_S1	0.890066	MADS	MADS-box transcription factor 6 [Glycine max]
arahy.Y0XCRM	6.34511	0.453136	0.0994487	0.240005	ZH16_S1	0.928585	MADS	MADS-box transcription factor 6 [Glycine max]
arahy.DI51EV	175.819	0.0602195	0.075437	0	ZH16_S1	0.999571	MADS	MADS-box transcription factor family protein
arahy.5I1DLU	1.22554	0.174665	0.127502	0.0227228	ZH16_S1	0.857479	LUG	vacuolar H+-translocating inorganic pyrophosphatase
arahy.E2AMGU	8.11239	0	0.0885904	0	ZH16_S1	0.98908	LOB	LOB domain-containing protein 11
arahy.HWDC2K	5.63336	0.670663	0.0317167	0.0548532	ZH16_S1	0.880948	LOB	LOB domain-containing protein 25
arahy.6FN146	15.0218	1.59544	0.412618	0.284289	ZH16_S1	0.893792	LOB	LOB domain-containing protein 21
Novel01109	4.13753	0.465337	0	0.0323358	ZH16_S1	0.887533	LOB	--
arahy.HLV3JX	1.39687	0.225648	0.052416	0	ZH16_S1	0.838461	LOB	LOB domain-containing protein 21
arahy.U9CUV0	9.48058	0.572712	1.12674	0.315118	ZH16_S1	0.881153	LOB	LOB domain-containing protein 21
arahy.1T51F3	6.82494	0	0	0	ZH16_S1	1	LOB	LOB domain-containing protein 1
Novel04032	1.77774	0	0	0	ZH16_S1	1	LOB	--
arahy.8GTF30	3.8872	0.575346	1.75402	1.29725	ZH16_S1	0.54877	LOB	LOB domain-containing protein 10
arahy.GEQ2UZ	14.4366	0	0.244729	0.080519	ZH16_S1	0.983048	LIM	GATA type zinc finger transcription factor family protein
arahy.RV2JC2	12.3788	0	0	0	ZH16_S1	1	LIM	GATA type zinc finger transcription factor family protein
arahy.NAU3FJ	16.1599	1.45479	1.30924	1.35588	ZH16_S1	0.909975	LIM	GATA type zinc finger transcription factor family protein
arahy.3RB8EG	2.05709	0	0	0	ZH16_S1	1	LIM	GATA type zinc finger transcription factor family protein
arahy.0IXS7Z	1.38648	0	0	0	ZH16_S1	1	LIM	GATA type zinc finger transcription factor family protein
arahy.JL97TY	4.96234	0	0	0	ZH16_S1	1	LIM	GATA type zinc finger transcription factor family protein
arahy.SI0BUE	38.4037	8.11262	6.08879	4.2441	ZH16_S1	0.788754	LIM	Unknown protein
arahy.VFJ7H8	4.31995	0.293298	0	0	ZH16_S1	0.932106	LIM	GATA type zinc finger transcription factor family protein
arahy.E2WEK6	3.34293	0.631479	0.253692	0.029658	ZH16_S1	0.8111	LIM	GATA type zinc finger transcription factor family protein
arahy.Y876JP	18.3026	2.90574	1.02885	0.606789	ZH16_S1	0.841239	Jumonji	2-oxoglutarate (2OG) and Fe(II)-dependent oxygenase superfamily protein
arahy.NS6D80	1.04034	0.297465	0.0609211	0.054603	ZH16_S1	0.71407	Jumonji	probable lysine-specific demethylase JMJ14-like isoform X4 [Glycine max]
arahy.H9D2WH	23.4988	2.44156	1.74573	0.655648	ZH16_S1	0.896099	Jumonji	transcription factor, putative
arahy.F10EXU	21.4973	10.6638	5.34387	3.23006	ZH16_S1	0.503947	IWS1	probable mediator of RNA polymerase II transcription subunit 26c-like isoform X2 [Glycine max]
arahy.W5F641	11.2891	5.47901	2.81272	2.0553	ZH16_S1	0.514665	IWS1	probable mediator of RNA polymerase II transcription subunit 26c-like isoform X3 [Glycine max]
arahy.7BZL8T	0.470067	0	0	0	ZH16_S1	1	HSF	heat shock transcription factor B4
arahy.2NFP2H	5.54578	0.0357804	0	0	ZH16_S1	0.993548	HSF	heat shock transcription factor A2
arahy.2L3ISV	9.34174	1.19999	1.3114	0.986109	ZH16_S1	0.85962	HSF	vacuolar iron transporter 1
arahy.7Z43AK	14.0991	0.22101	0	0	ZH16_S1	0.984325	HSF	heat shock transcription factor A2
arahy.PK48VF	7.67271	0.226096	0.0682968	0.0669177	ZH16_S1	0.970532	HSF	heat shock transcription factor C1
arahy.42KS26	19.8601	0	0	0	ZH16_S1	1	HSF	heat shock transcription factor C1
arahy.U0TDM7	23.1836	1.54163	9.43104	4.47493	ZH16_S1	0.593202	HB	BEL1-like homeodomain protein 1-like isoform X4 [Glycine max]
arahy.P00G4Y	0.832951	0.0775739	0.0371298	0	ZH16_S1	0.906869	HB	BEL1-like homeodomain protein 8-like isoform X2 [Glycine max]
arahy.WU4ITJ	12.3871	5.59779	2.61995	3.95068	ZH16_S1	0.548097	HB	DNA binding protein, putative n=6 Tax=rosids RepID=B9SVC7_RICCO
arahy.1QJ78E	34.2684	1.82269	5.68209	2.57428	ZH16_S1	0.834188	HB	DNA-binding protein n=1 Tax=Catharanthus roseus RepID=A1DR78_CATRO
arahy.69QRE7	97.9215	1.43238	1.40226	1.94057	ZH16_S1	0.980182	HB	DNA-binding protein n=1 Tax=Catharanthus roseus RepID=A1DR78_CATRO
arahy.V2YWYI	17.3576	0.0656555	0.256168	0.101355	ZH16_S1	0.985242	HB	homeobox protein knotted-1-like 6-like [Glycine max]
arahy.QL12SG	18.9729	8.37202	4.99913	5.1996	ZH16_S1	0.558737	HB	DNA-binding protein n=1 Tax=Catharanthus roseus RepID=A1DR77_CATRO
arahy.S28ZE3	4.50739	0.226602	0	0.196413	ZH16_S1	0.949727	HB	homeobox protein knotted-1-like 7-like isoform X2 [Glycine max]
arahy.FYS41P	1.11801	0.100327	0.0484545	0.115469	ZH16_S1	0.896719	HB	Homeobox-leucine zipper protein family
arahy.3GQ9MB	1.5	0.0726763	0.221996	0.0936949	ZH16_S1	0.852003	HB	BEL1-like homeodomain protein 1-like isoform X3 [Glycine max]
arahy.EP4LC1	3.19306	0.0958004	0.499102	0.299902	ZH16_S1	0.843692	HB	homeobox protein knotted-1-like 2-like [Glycine max]
arahy.WNIN40	0.843338	0.112345	0.298725	0.241153	ZH16_S1	0.645783	HB	homeobox-leucine zipper protein 3
arahy.4NTH9K	59.2559	11.3051	13.549	12.086	ZH16_S1	0.771347	HB	homeobox protein knotted-1-like 3-like isoform X1 [Glycine max]
arahy.VX60JM	16.8452	4.62324	3.26902	2.34014	ZH16_S1	0.725545	HB	DNA-binding protein n=1 Tax=Daucus carota RepID=Q43429_DAUCA
arahy.AL7WCM	6.37616	0.103838	0.644361	0.634286	ZH16_S1	0.898942	HB	BEL1-like homeodomain protein 8-like isoform X2 [Glycine max]
arahy.JCQF9U	9.05467	0.212777	0.569311	0.895614	ZH16_S1	0.901088	HB	homeobox protein knotted-1-like 2-like isoform 1 [Glycine max]
arahy.GUW9QM	4.57204	2.2729	1.6197	1.39416	ZH16_S1	0.502869	HB	homeobox-leucine zipper protein ANTHOCYANINLESS 2-like isoform X2 [Glycine max]
arahy.00W5AZ	4.70603	0.0735811	0.152914	0	ZH16_S1	0.967507	HB	homeobox protein knotted-1-like 1-like [Glycine max]
arahy.28P3YA	8.3094	0.570203	0.630763	0.15942	ZH16_S1	0.92409	HB	Homeobox-leucine zipper protein family
arahy.F41U3J	2.30918	0.055521	0.00790191	0.0321664	ZH16_S1	0.975956	HB	BEL1-like homeodomain protein 2-like isoform X3 [Glycine max]
arahy.FU8PR5	5.67644	0.0980527	0.523235	0.35626	ZH16_S1	0.907823	HB	homeobox protein knotted-1-like 2-like isoform 1 [Glycine max]
arahy.VD5ZG0	1.64517	0.124752	0.327058	0.268318	ZH16_S1	0.801201	HB	homeobox protein knotted-1-like 2-like [Glycine max]
arahy.L20P4L	3.7425	0.749224	0.387682	0.130071	ZH16_S1	0.799807	HB	Homeobox-leucine zipper protein family
arahy.YS1RTV	50.0633	13.2396	14.6411	7.34423	ZH16_S1	0.707548	HB	DNA-binding protein n=1 Tax=Catharanthus roseus RepID=A1DR78_CATRO
arahy.50TKKU	17.875	6.36108	3.63497	4.39632	ZH16_S1	0.644135	HB	DNA binding protein, putative n=6 Tax=rosids RepID=B9SVC7_RICCO
arahy.C7XUBI	52.9035	16.2427	17.3622	15.3848	ZH16_S1	0.671814	HB	homeobox protein knotted-1-like 3-like isoform X1 [Glycine max]
arahy.G5MH8T	1.17857	0.16712	0.129901	0.151514	ZH16_S1	0.858202	HB	GTP-binding nuclear protein Ran-3 [Glycine max]
arahy.ZS6XNI	104.198	1.78864	1.38651	1.52915	ZH16_S1	0.982834	HB	DNA-binding protein n=1 Tax=Catharanthus roseus RepID=A1DR78_CATRO
arahy.ZRTB0J	75.6677	3.05607	6.05686	3.72022	ZH16_S1	0.919954	HB	BEL1-like homeodomain protein 1-like isoform X4 [Glycine max]
arahy.MA4NXX	0.682305	0.10025	0	0.0386859	ZH16_S1	0.853072	HB	BEL1-like homeodomain protein 8-like isoform X2 [Glycine max]
arahy.EUX0L6	1.04689	0.0894688	0.20856	0.196551	ZH16_S1	0.800781	HB	homeobox protein knotted-1-like 2-like [Glycine max]
arahy.F1GXSN	2.37165	0.535698	0.116327	0.113877	ZH16_S1	0.774124	HB	homeobox-leucine zipper protein 17
arahy.B0V7RI	15.2657	0	0.120487	0.24597	ZH16_S1	0.983887	HB	homeobox protein knotted-1-like 6-like [Glycine max]
Novel01121	5.01128	0.866059	2.19442	0.932408	ZH16_S1	0.562104	GRAS	--
arahy.KSUC5C	63.2851	6.16836	6.14023	5.07346	ZH16_S1	0.902531	GRAS	scarecrow-like protein 15-like [Glycine max]
Novel03783	54.6331	6.53723	7.81154	4.1644	ZH16_S1	0.857018	GRAS	--
arahy.VJ1JJD	3.87674	0.114091	0.0416696	0.0720666	ZH16_S1	0.97057	GRAS	scarecrow-like transcription factor PAT1-like [Glycine max]
arahy.2AD11G	0.775728	0.056952	0.283583	0.261211	ZH16_S1	0.634429	GNAT	probable N-acetyltransferase HLS1-like [Glycine max]
arahy.52L85T	2.10677	0.0556132	0.0557301	0	ZH16_S1	0.973547	GNAT	Unknown protein
arahy.CV28ZI	3.4457	0.18586	0.0701157	0.242531	ZH16_S1	0.929613	GNAT	probable N-acetyltransferase HLS1-like [Glycine max]
arahy.XHC94G	8.96928	3.57028	2.70864	2.42429	ZH16_S1	0.601943	GNAT	acyl-CoA N-acyltransferase (NAT) superfamily protein
arahy.RYXG2W	3.51393	0.113398	0.609111	1.67205	ZH16_S1	0.524166	GNAT	probable N-acetyltransferase HLS1-like [Glycine max]
arahy.USM880	3.00577	0.118598	0.0837377	0.0354693	ZH16_S1	0.960543	GNAT	probable N-acetyltransferase HLS1-like [Glycine max]
arahy.GCG1Y2	4.00876	0.202322	0.269464	0.221954	ZH16_S1	0.932781	GNAT	probable N-acetyltransferase HLS1-like [Glycine max]
Novel01194	3.11851	0.327203	0.109795	0.133362	ZH16_S1	0.895077	GNAT	--
arahy.DD0TCJ	11.9563	2.97775	1.59018	1.20478	ZH16_S1	0.750948	G2-like	two-component response regulator-like APRR2-like isoform X1 [Glycine max]
arahy.LL3JQF	14.1795	0.0496042	0.251355	0.295071	ZH16_S1	0.97919	G2-like	myb family transcription factor APL-like isoform X2 [Glycine max]
Novel01834	3.22055	0.114713	0.168982	0.390852	ZH16_S1	0.878638	G2-like	--
arahy.X8J8BT	2.02252	0.460458	0.71206	0.459843	ZH16_S1	0.647935	G2-like	myb family transcription factor APL-like isoform X2 [Glycine max]
arahy.23K5JN	1.45421	0.219667	0.525614	0.461102	ZH16_S1	0.638558	G2-like	myb family transcription factor APL-like isoform X2 [Glycine max]
arahy.ISGY16	14.2599	1.34746	3.50391	2.47026	ZH16_S1	0.754283	G2-like	myb family transcription factor APL-like isoform X5 [Glycine max]
arahy.MQY6TT	78.4792	3.40974	3.39483	1.40526	ZH16_S1	0.956552	G2-like	two-component response regulator-like APRR2-like isoform X2 [Glycine max]
arahy.893SZW	4.75391	0.27976	0.287487	1.06046	ZH16_S1	0.776928	G2-like	two-component response regulator ARR2-like isoform X1 [Glycine max]
arahy.RSPK5C	0.423674	0	0	0	ZH16_S1	1	G2-like	putative Myb family transcription factor At1g14600-like isoform X2 [Glycine max]
arahy.6R8KAD	8.74211	2.92086	2.54372	1.22564	ZH16_S1	0.665886	G2-like	two-component response regulator-like APRR2-like isoform X1 [Glycine max]
arahy.USKV5G	15.4151	0.283909	1.17368	1.10853	ZH16_S1	0.923861	G2-like	myb family transcription factor APL-like isoform X1 [Glycine max]
arahy.Y2U02I	61.0508	3.14351	2.09448	0.833579	ZH16_S1	0.94851	G2-like	two-component response regulator-like APRR2-like isoform X2 [Glycine max]
arahy.RRN1ZJ	13.4899	0	0.192086	0.465381	ZH16_S1	0.965502	G2-like	myb family transcription factor APL-like isoform X2 [Glycine max]
arahy.GRY8GW	9.89665	4.2319	2.67118	1.25592	ZH16_S1	0.572391	G2-like	two-component response regulator-like APRR2-like isoform X2 [Glycine max]
arahy.J44A69	5.73172	2.09743	1.20974	1.204	ZH16_S1	0.634067	G2-like	myb family transcription factor APL-like isoform X1 [Glycine max]
arahy.7L0GHA	10.3067	0.843833	2.61853	2.19622	ZH16_S1	0.74594	G2-like	myb family transcription factor APL-like isoform X5 [Glycine max]
arahy.GQXZ8M	1.07767	0.0628023	0.267668	0.221986	ZH16_S1	0.751624	G2-like	myb family transcription factor APL-like isoform X1 [Glycine max]
arahy.N32TVW	15.0189	0.237599	1.64714	1.27259	ZH16_S1	0.890329	G2-like	myb family transcription factor APL-like isoform X1 [Glycine max]
arahy.FYEN8G	3.57098	1.63547	1.21231	1.30849	ZH16_S1	0.542011	FHA	tyrosyl-DNA phosphodiesterase-related
arahy.8WWL95	24.1139	9.07065	5.53101	3.93191	ZH16_S1	0.623841	FAR1	receptor-like kinase 1
arahy.S7XF8N	155.57	76.6305	52.72	39.6179	ZH16_S1	0.50742	EIL	Ethylene insensitive 3 family protein
arahy.J729H0	167.748	53.6435	46.6754	33.4906	ZH16_S1	0.680214	EIL	Ethylene insensitive 3 family protein
arahy.Y1FCW9	6.24227	2.26713	1.31846	1.91191	ZH16_S1	0.636809	CPP	protein tesmin/TSO1-like CXC 5-like isoform X1 [Glycine max]
arahy.XUEC37	4.41448	1.06761	1.51692	2.03086	ZH16_S1	0.539955	CAMTA	calmodulin-binding transcription activator
arahy.V3UUR8	5.94722	1.53351	1.74748	1.91954	ZH16_S1	0.677237	CAMTA	calmodulin-binding transcription activator
arahy.QW19KK	28.2473	13.8495	10.9904	7.97554	ZH16_S1	0.509705	C3H	zinc finger CCCH domain-containing protein 17-like [Glycine max]
arahy.I5G2IR	0.696465	0.0194916	0.183526	0.193084	ZH16_S1	0.722766	C2H2	protein TRANSPARENT TESTA 1-like [Glycine max]
arahy.LRN7UR	9.55753	1.10161	0.259641	0.247464	ZH16_S1	0.884739	C2H2	zinc finger protein 3
arahy.RRM2UF	144.368	22.3064	14.1077	17.6857	ZH16_S1	0.845489	C2H2	C2H2-like zinc finger protein
arahy.UTHZ1X	6.11949	0.202826	0.462624	0.551486	ZH16_S1	0.90988	C2H2	zinc-finger protein 2
arahy.MH5UWC	10.7486	5.15576	3.21239	3.12674	ZH16_S1	0.520334	C2H2	C2-H2 zinc finger protein [Glycine max]
arahy.T5C9EA	19.4935	6.67089	4.17429	3.961	ZH16_S1	0.65779	C2H2	zinc finger protein MAGPIE-like [Glycine max]
arahy.V8NH83	15.7605	6.33983	3.87489	3.99234	ZH16_S1	0.597739	C2H2	zinc finger protein MAGPIE-like [Glycine max]
arahy.53HSKV	17.7704	0.0774917	0.477342	0.092087	ZH16_S1	0.973138	C2H2	zinc-finger protein 2
arahy.BAL5EB	16.1975	3.72478	2.38236	1.29325	ZH16_S1	0.770039	C2H2	plant UBX domain-containing protein 2
arahy.YVFI37	4.67888	0.0339026	0.0289507	0	ZH16_S1	0.992754	C2H2	zinc-finger protein 1
arahy.MP8D0L	33.1121	0.50658	0.631489	0.686287	ZH16_S1	0.979274	C2H2	zinc finger protein MAGPIE-like [Glycine max]
arahy.DDPG02	17.7112	0.60353	0.867637	0.548374	ZH16_S1	0.951012	C2H2	zinc finger protein MAGPIE-like [Glycine max]
arahy.30QFZV	1.55601	0.184766	0.260733	0.186187	ZH16_S1	0.832435	C2H2	protein TRANSPARENT TESTA 1-like [Glycine max]
arahy.3BZ0QS	0.75468	0	0.0585215	0.203272	ZH16_S1	0.730652	C2H2	protein TRANSPARENT TESTA 1-like [Glycine max]
arahy.LXQM1X	186.445	30.1685	16.4669	15.3908	ZH16_S1	0.838191	C2H2	C2H2-like zinc finger protein
arahy.IVEQ23	12.8093	3.60554	2.79863	1.54971	ZH16_S1	0.718522	C2H2	plant UBX domain-containing protein 2
arahy.A8Q4IW	10.2162	4.1415	1.55195	1.00931	ZH16_S1	0.594616	C2H2	C2H2-like zinc finger protein
arahy.KL0YJC	0.217933	0	0	0	ZH16_S1	1	C2H2	S-adenosylmethionine-dependent methyltransferase
arahy.XTEC92	1.18388	0.30663	0.199084	0.22797	ZH16_S1	0.740995	C2H2	protein TRANSPARENT TESTA 1-like [Glycine max]
arahy.CZ7D1D	0.726361	0	0	0	ZH16_S1	1	C2C2-YABBY	YABBY transcription factor
arahy.W7IKXG	11.0173	0.150484	0.201342	0.0275745	ZH16_S1	0.981725	C2C2-YABBY	YABBY transcription factor
arahy.32YMTN	0.845408	0	0	0.0449578	ZH16_S1	0.946821	C2C2-YABBY	YABBY transcription factor
arahy.20NM7L	79.5599	0.755274	0.837392	1.03338	ZH16_S1	0.987011	C2C2-YABBY	YABBY transcription factor
arahy.MV37LX	15.743	0.620695	5.29885	4.54136	ZH16_S1	0.663416	C2C2-GATA	GATA transcription factor 12
arahy.KA6YJ2	9.91524	1.30776	2.06725	2.39509	ZH16_S1	0.758444	C2C2-GATA	GATA transcription factor 9
arahy.E1UHJ9	37.1818	0.144477	0.82509	0.706771	ZH16_S1	0.977809	C2C2-GATA	GATA transcription factor 9
arahy.23I7N3	23.1462	0.508343	6.30779	5.33103	ZH16_S1	0.72748	C2C2-GATA	GATA transcription factor 12
arahy.GUPV5U	19.2688	7.34775	8.45056	5.66923	ZH16_S1	0.561439	C2C2-GATA	GATA transcription factor 9
arahy.Z6CAHI	49.4255	0.595402	1.87062	1.16044	ZH16_S1	0.962153	C2C2-GATA	GATA transcription factor 9
arahy.MQC2P6	18.8307	1.79588	6.66551	5.36145	ZH16_S1	0.646029	C2C2-Dof	DOF zinc finger protein 1
arahy.FCS600	1.48449	0.07142	0.191453	0.131602	ZH16_S1	0.871031	C2C2-Dof	Dof-type zinc finger DNA-binding family protein
arahy.TL4KP4	19.0206	3.26017	1.60467	1.18017	ZH16_S1	0.828598	C2C2-Dof	dof zinc finger protein DOF5.6 [Glycine max]
arahy.R2DQAY	16.1007	6.16999	4.65369	1.91999	ZH16_S1	0.616788	C2C2-Dof	dof zinc finger protein DOF3.1-like [Glycine max]
arahy.MKQQ3C	18.5216	7.69559	2.6857	2.2324	ZH16_S1	0.584508	C2C2-Dof	DOF zinc finger protein 1
Novel03826	11.0132	2.3878	3.14802	2.80788	ZH16_S1	0.714159	C2C2-Dof	--
arahy.AVJN5E	1.05433	0.0921853	0.0644283	0.0225838	ZH16_S1	0.912565	C2C2-Dof	DOF zinc finger protein 1
arahy.2AYT2S	20.6726	6.35307	2.0762	1.89568	ZH16_S1	0.692682	C2C2-Dof	dof zinc finger protein DOF2.1-like [Glycine max]
Novel00244	16.7911	0.739398	4.26055	2.39282	ZH16_S1	0.746261	C2C2-Dof	--
arahy.FB5SUK	1.54946	0.123131	0.119797	0	ZH16_S1	0.920533	C2C2-Dof	DOF zinc finger protein 1
arahy.90U3DG	3.27758	0.235067	0.128781	0.267957	ZH16_S1	0.918246	C2C2-Dof	DOF zinc finger protein 1
Novel00650	14.5965	1.8144	6.71137	4.89751	ZH16_S1	0.540207	C2C2-Dof	--
Novel00638	1.47317	0.206011	0.0860233	0	ZH16_S1	0.860158	C2C2-Dof	--
arahy.M9WVP0	27.323	9.64427	9.24596	7.10445	ZH16_S1	0.647027	C2C2-Dof	dof zinc finger protein DOF3.1-like [Glycine max]
arahy.8CQX48	9.69348	3.48894	2.74196	1.25485	ZH16_S1	0.640073	C2C2-Dof	dof zinc finger protein DOF3.6-like [Glycine max]
arahy.S8490G	7.30785	0.901566	2.91518	1.31986	ZH16_S1	0.601089	C2C2-Dof	DOF zinc finger protein 1
arahy.NQ5KT7	6.89767	0.996307	0.730319	0.436752	ZH16_S1	0.855559	C2C2-Dof	dof zinc finger protein DOF5.6-like [Glycine max]
arahy.P7BG5E	15.8179	5.3555	5.34836	4.84741	ZH16_S1	0.661428	C2C2-Dof	dof zinc finger protein DOF5.6 [Glycine max]
Novel03164	17.6891	4.33502	2.36296	1.26406	ZH16_S1	0.754933	C2C2-Dof	--
arahy.9V5RCF	2.06541	0.273079	0.250585	0.370432	ZH16_S1	0.820649	C2C2-Dof	DOF zinc finger protein 1
arahy.X4Y7ER	6.42835	0.59556	1.93288	0.981576	ZH16_S1	0.699319	C2C2-Dof	DOF zinc finger protein 1
arahy.S3IANQ	2.252	0.674071	0.502907	0.185015	ZH16_S1	0.700679	C2C2-CO-like	zinc finger protein CONSTANS-LIKE 2 [Glycine max]
arahy.76FTKD	54.2495	6.27928	8.31966	7.56408	ZH16_S1	0.846641	bZIP	TGACG-sequence-specific DNA-binding protein TGA-1B-like [Glycine max]
arahy.A6EHAN	6.50784	2.62016	1.63233	1.76637	ZH16_S1	0.597384	bZIP	bZIP family transcription factor
arahy.BII4R6	9.38391	2.60706	4.42517	2.90035	ZH16_S1	0.52843	bZIP	cellulose synthase 1
arahy.ZES6QF	22.9309	1.66421	0.653397	0.269008	ZH16_S1	0.927425	bZIP	TGACG-sequence-specific DNA-binding protein TGA-1B-like [Glycine max]
arahy.HW01DK	30.0554	0.0624777	0.112051	0	ZH16_S1	0.996272	bZIP	TGACG-sequence-specific DNA-binding protein TGA-1B-like [Glycine max]
arahy.IH0HR2	0.641599	0	0	0	ZH16_S1	1	bZIP	Basic-leucine zipper (bZIP) transcription factor family protein
arahy.V9YTQ9	5.42482	1.94094	2.39352	1.74437	ZH16_S1	0.558784	bZIP	signal peptide peptidase A (SppA) 36 kDa type protein
arahy.B9TTNC	0.466981	0	0	0	ZH16_S1	1	bZIP	Basic-leucine zipper (bZIP) transcription factor family protein
arahy.71DGVH	7.98964	3.42633	0.688999	0.633554	ZH16_S1	0.571154	bZIP	bZIP family transcription factor
arahy.4SA7RY	10.5959	4.31388	4.69188	1.38609	ZH16_S1	0.557199	bZIP	bZIP transcription factor family protein
arahy.5XCD2W	30.3647	3.17269	2.81161	2.09891	ZH16_S1	0.895514	bZIP	bZIP family transcription factor
arahy.H0KCEK	12.2246	5.59286	3.12779	1.69925	ZH16_S1	0.542493	bZIP	bZIP family transcription factor
arahy.T95EUW	166.901	60.6325	34.9279	31.265	ZH16_S1	0.636715	bZIP	BZIP transcription factor
arahy.V67U6Z	23.2239	1.02525	0.202854	0.0230589	ZH16_S1	0.955854	bZIP	bZIP family transcription factor
arahy.MHQ5U3	29.3934	3.14645	1.71003	1.64367	ZH16_S1	0.892954	bZIP	bZIP family transcription factor
arahy.4YG78R	5.32507	1.97964	2.1825	1.37122	ZH16_S1	0.590147	bZIP	bZIP family transcription factor
arahy.0BLG9X	7.72848	2.52411	0.544927	0.0390397	ZH16_S1	0.673401	bZIP	bZIP family transcription factor
arahy.3M73WP	18.8432	9.13005	5.94506	4.51925	ZH16_S1	0.515473	bZIP	BZIP transcription factor
arahy.9ZXH08	78.9994	2.23273	9.48493	5.36471	ZH16_S1	0.879937	bZIP	TGACG-sequence-specific DNA-binding protein TGA-1B-like [Glycine max]
arahy.99PJJG	21.5515	8.23752	8.80965	4.87961	ZH16_S1	0.591227	bZIP	Basic-leucine zipper (bZIP) transcription factor family protein
arahy.I48WTL	3.89915	0.340493	0.0621792	0	ZH16_S1	0.912675	bZIP	DNA binding protein, putative n=1 Tax=Ricinus communis RepID=B9REP3_RICCO
arahy.NEJ4KC	17.3626	5.55143	3.74457	2.60847	ZH16_S1	0.680265	bZIP	bZIP family transcription factor
arahy.J541GW	14.9973	6.68029	6.25263	4.20346	ZH16_S1	0.554567	bZIP	TGACG-sequence-specific DNA-binding protein TGA-1B-like [Glycine max]
arahy.NS2HRD	0.43922	0	0	0	ZH16_S1	1	bZIP	TGACG-sequence-specific DNA-binding protein TGA-1B-like [Glycine max]
arahy.A7US25	24.3485	0.0863889	0.83618	0.919096	ZH16_S1	0.962253	bZIP	DNA binding protein, putative n=1 Tax=Ricinus communis RepID=B9R7B6_RICCO
arahy.EQL16Q	9.11326	2.81027	3.07591	1.85417	ZH16_S1	0.66248	bZIP	bZIP transcription factor family protein
arahy.05P1IU	26.0359	9.29595	8.2345	5.82569	ZH16_S1	0.642957	bZIP	Basic-leucine zipper (bZIP) transcription factor family protein
arahy.AVA03Z	15.6292	5.90026	6.58632	4.05278	ZH16_S1	0.578588	bZIP	TGACG-sequence-specific DNA-binding protein TGA-1B-like [Glycine max]
arahy.45BME0	15.8157	3.31294	2.34628	2.25339	ZH16_S1	0.790529	BSD	oxidoreductase, 2OG-Fe(II) oxygenase family protein
arahy.YGA72Z	44.3931	14.5241	18.2969	13.0115	ZH16_S1	0.587844	BSD	BSD domain-containing protein
arahy.IEB1S3	10.813	0.421667	0.526234	0.632229	ZH16_S1	0.941531	BSD	oxidoreductase, 2OG-Fe(II) oxygenase family protein
arahy.TI9N5S	26.3154	13.1273	11.7774	8.10077	ZH16_S1	0.501157	BSD	BSD domain-containing protein
Novel01312	28.9164	8.62212	7.69165	6.7889	ZH16_S1	0.701826	BSD	--
arahy.UA6S11	46.218	0.645863	1.56232	1.62369	ZH16_S1	0.964869	BSD	oxidoreductase, 2OG-Fe(II) oxygenase family protein
arahy.WS6KBW	36.2343	10.4096	14.5161	12.2039	ZH16_S1	0.599383	BSD	BSD domain-containing protein
arahy.SPY99B	153.344	14.8335	16.1979	14.6572	ZH16_S1	0.894368	BSD	oxidoreductase, 2OG-Fe(II) oxygenase family protein
arahy.I5HDSE	2.65264	1.0449	0.514378	0.269656	ZH16_S1	0.606091	bHLH	transcription factor bHLH123-like isoform X2 [Glycine max]
arahy.HD7TF9	1.82939	0.159548	0.233375	0.106268	ZH16_S1	0.87243	bHLH	transcription factor bHLH123-like isoform X2 [Glycine max]
arahy.00JV9G	57.9556	7.89571	1.95993	0.18165	ZH16_S1	0.863763	bHLH	transcription factor PIF3-like [Glycine max]
arahy.JCHF8R	3.13162	0.0946892	0.0879103	0.0207032	ZH16_S1	0.969764	bHLH	transcription factor bHLH130-like [Glycine max]
arahy.TPIF41	49.8987	10.3923	12.752	5.26882	ZH16_S1	0.744443	bHLH	basic helix-loop-helix (bHLH) DNA-binding superfamily protein
arahy.1SK5MK	1.44619	0.0503816	0	0	ZH16_S1	0.965163	bHLH	transcription factor BEE 1-like [Glycine max]
arahy.5JBK01	11.5822	0	0.103187	0	ZH16_S1	0.991091	bHLH	transcription factor BEE 3-like [Glycine max]
arahy.83FN4T	25.8619	1.39371	1.52381	0.720981	ZH16_S1	0.941079	bHLH	transcription factor bHLH13-like [Glycine max]
arahy.AMIM7J	2.99805	0	0	0	ZH16_S1	1	bHLH	transcription factor BEE 3-like [Glycine max]
arahy.Y3DHDC	43.3814	8.18451	3.72197	3.00024	ZH16_S1	0.811336	bHLH	transcription factor bHLH48-like [Glycine max]
arahy.L9MGWL	13.6887	0.247873	2.6588	1.52539	ZH16_S1	0.805766	bHLH	transcription factor bHLH63-like [Glycine max]
arahy.TV80DA	7.26758	3.0884	1.2672	0.707826	ZH16_S1	0.575045	bHLH	basic helix-loop-helix (bHLH) DNA-binding superfamily protein
arahy.U7HMBF	17.4344	7.49859	1.90887	2.79787	ZH16_S1	0.569896	bHLH	transcription factor bHLH74-like [Glycine max]
arahy.IGZ079	4.0033	0.609214	0	0.0379103	ZH16_S1	0.847822	bHLH	transcription factor bHLH25-like [Glycine max]
arahy.H47S4B	53.1439	2.02329	1.92122	0.927918	ZH16_S1	0.961928	bHLH	transcription factor bHLH79-like [Glycine max]
arahy.B097JA	46.2734	3.19217	3.86096	2.49234	ZH16_S1	0.916562	bHLH	transcription factor bHLH79-like [Glycine max]
arahy.0ZB9Y5	1.07382	0.266021	0.365399	0.117406	ZH16_S1	0.659721	bHLH	transcription factor bHLH51-like [Glycine max]
arahy.02IZMF	31.5732	0.870125	0.0277797	0.0207755	ZH16_S1	0.972441	bHLH	transcription factor PIF3-like [Glycine max]
arahy.SVL5FL	16.339	0.697121	0.0311521	0.0625662	ZH16_S1	0.957334	bHLH	transcription factor bHLH137-like [Glycine max]
arahy.WVIE7L	105.281	0.135674	0.15758	0	ZH16_S1	0.998503	bHLH	transcription factor bHLH135 [Glycine max]
arahy.577H6Y	88.8213	0.263636	0.0674427	0.0583202	ZH16_S1	0.997032	bHLH	transcription factor bHLH135 [Glycine max]
arahy.H39FBL	1.69433	0.363726	0.343184	0.132612	ZH16_S1	0.785328	bHLH	transcription factor bHLH51 [Glycine max]
arahy.R1MRXV	9.88246	0.507472	0.0959387	0.0767134	ZH16_S1	0.948649	bHLH	transcription factor bHLH137-like [Glycine max]
arahy.6187DS	24.9959	3.1612	9.76269	6.91521	ZH16_S1	0.609428	bHLH	transcription factor MYC2-like [Glycine max]
arahy.N0BKZ2	26.0611	2.34867	1.67836	0.801379	ZH16_S1	0.909878	bHLH	transcription factor bHLH13-like [Glycine max]
arahy.N6Y25N	71.3618	6.28895	33.2476	24.5001	ZH16_S1	0.534098	bHLH	transcription factor bHLH66-like [Glycine max]
arahy.P8DJ8N	3.79487	0.414469	1.13562	0.672509	ZH16_S1	0.700748	bHLH	transcription factor PIF3-like [Glycine max]
arahy.K68BG4	3.72437	1.78203	0.534406	0.355152	ZH16_S1	0.521521	bHLH	transcription factor bHLH62-like [Glycine max]
arahy.92JXLG	0.153819	0	0	0	ZH16_S1	1	bHLH	basic helix-loop-helix (bHLH) DNA-binding superfamily protein
arahy.Q6CIEG	52.2244	2.68803	1.49784	1.25202	ZH16_S1	0.948529	bHLH	phospholipid-transporting ATPase 3-like [Glycine max]
arahy.A7SJM3	55.2806	15.9317	14.3204	6.71522	ZH16_S1	0.711803	bHLH	transcription factor BIM1-like [Glycine max]
arahy.QKV9FM	8.48351	1.99573	1.88865	1.17327	ZH16_S1	0.764752	bHLH	transcription factor PIF3-like [Glycine max]
arahy.IJCM88	21.4431	6.77636	3.45036	2.53492	ZH16_S1	0.683984	bHLH	transcription factor bHLH48-like [Glycine max]
arahy.L9MWY5	47.5746	14.0755	6.41678	5.63801	ZH16_S1	0.704138	bHLH	transcription factor bHLH78-like [Glycine max]
arahy.35WB4A	19.0406	2.47606	2.41197	1.18502	ZH16_S1	0.869959	bHLH	transcription factor bHLH48-like [Glycine max]
arahy.QM38BL	0.800422	0	0	0	ZH16_S1	1	bHLH	transcription factor BEE 1-like [Glycine max]
arahy.HPVM6W	12.6598	1.17283	3.64211	1.9994	ZH16_S1	0.71231	bHLH	transcription factor bHLH63-like [Glycine max]
arahy.HVT10G	2.17383	0	0.201993	0	ZH16_S1	0.90708	bHLH	basic helix-loop-helix (bHLH) DNA-binding superfamily protein
arahy.9RJJ4S	86.6177	9.74721	30.2468	20.7317	ZH16_S1	0.650801	bHLH	transcription factor bHLH66-like [Glycine max]
arahy.29A50M	53.3551	0.0724143	0.0480423	0.0399627	ZH16_S1	0.998643	bHLH	transcription factor bHLH135 [Glycine max]
arahy.N7IIZM	2.86818	0	0.238085	0	ZH16_S1	0.916991	bHLH	basic helix-loop-helix (bHLH) DNA-binding superfamily protein
arahy.RV0HHT	2.78177	0.0454959	0	0.139266	ZH16_S1	0.949936	bHLH	transcription factor bHLH130-like [Glycine max]
arahy.SE4UA1	41.7405	2.28099	1.22849	1.28711	ZH16_S1	0.945353	bHLH	putative phospholipid-transporting ATPase 9-like isoform X1 [Glycine max]
arahy.VUQ1KR	28.3734	3.44302	2.92309	2.3624	ZH16_S1	0.878653	bHLH	transcription factor bHLH48-like [Glycine max]
arahy.I2EZUU	55.7138	11.857	10.9349	6.61621	ZH16_S1	0.787181	BES1	BES1/BZR1 homolog protein 4-like [Glycine max]
arahy.7MK8W0	71.6485	35.0489	22.0971	15.3381	ZH16_S1	0.510821	BES1	BES1/BZR1 homolog 2
arahy.5F6EYN	44.7898	9.31054	11.2567	6.8521	ZH16_S1	0.748677	BES1	BES1/BZR1 homolog protein 4-like [Glycine max]
arahy.SPI7HB	85.0535	34.8601	22.4502	13.0165	ZH16_S1	0.59014	BES1	BES1/BZR1 homolog 2
arahy.IS30UE	1.09998	0.272012	0.50087	0.298695	ZH16_S1	0.544657	BES1	BES1/BZR1 homolog 1
arahy.Q1FV6H	90.9623	21.0548	15.6256	13.743	ZH16_S1	0.768533	AUX/IAA	indole-3-acetic acid inducible 14
arahy.HEXM1C	0.155154	0	0	0	ZH16_S1	1	AUX/IAA	auxin response factor 19
arahy.VW0TTK	185.631	18.0313	17.794	19.1106	ZH16_S1	0.897051	AUX/IAA	auxin response factor 11
arahy.PH74U7	141.331	2.50861	0.329388	0.58465	ZH16_S1	0.98225	AUX/IAA	indole-3-acetic acid inducible 2
arahy.QUY0YV	307.244	7.72739	1.79359	0.941304	ZH16_S1	0.974849	AUX/IAA	indole-3-acetic acid inducible 14
arahy.F753KD	18.0633	7.67321	1.82974	0.678966	ZH16_S1	0.575204	AUX/IAA	indole-3-acetic acid inducible 9
arahy.5PE8VQ	1.69819	0.0675553	0.162667	0	ZH16_S1	0.904212	AUX/IAA	indole-3-acetic acid inducible 9
arahy.UBHF2S	400.611	3.36247	0.794513	0.251234	ZH16_S1	0.991607	AUX/IAA	indole-3-acetic acid inducible 14
arahy.944YYF	448.768	13.071	2.93849	2.59334	ZH16_S1	0.970874	AUX/IAA	indole-3-acetic acid inducible 14
arahy.X1FQXP	17.1566	1.10629	0.542613	0.591443	ZH16_S1	0.935518	AUX/IAA	indole-3-acetic acid inducible 18
arahy.PE1VQV	77.9415	21.0964	12.372	9.51375	ZH16_S1	0.72933	AUX/IAA	indole-3-acetic acid inducible 14
arahy.CB6084	454.604	1.94972	1.84162	1.44284	ZH16_S1	0.995711	AUX/IAA	indole-3-acetic acid inducible 14
arahy.32M24S	102.604	6.28069	2.45596	1.34427	ZH16_S1	0.938787	AUX/IAA	auxin response factor 11
arahy.MDB4JZ	9.93823	3.47765	1.63641	1.95185	ZH16_S1	0.650074	AUX/IAA	indole-3-acetic acid inducible 11
arahy.5P5CS5	126.919	18.3874	17.9312	19.2249	ZH16_S1	0.848526	AUX/IAA	auxin response factor 11
arahy.Q3RA0M	1.14194	0.512038	0.0573249	0.126836	ZH16_S1	0.551607	ARR-B	two-component response regulator ARR2-like [Glycine max]
arahy.0DD300	16.7496	4.77866	1.52445	1.03175	ZH16_S1	0.714699	ARR-B	two-component response regulator ARR2-like [Glycine max]
arahy.QRG75F	9.8746	3.94349	1.89933	0.879017	ZH16_S1	0.600643	ARR-B	two-component response regulator ARR2-like [Glycine max]
arahy.6B39MA	10.9038	4.03478	2.85077	3.21095	ZH16_S1	0.629965	ARF	auxin response factor 19
arahy.6MXT9H	5.27175	2.07315	0.782332	1.27198	ZH16_S1	0.606743	ARF	auxin response factor 8
arahy.WEMF8J	29.3283	12.8058	6.51595	7.55007	ZH16_S1	0.563364	ARF	auxin response factor 8
arahy.RP1SVX	14.9395	4.62366	3.66095	3.62224	ZH16_S1	0.690508	ARF	auxin response factor 6
arahy.EIIH6H	26.7808	10.558	6.09435	7.31297	ZH16_S1	0.605764	ARF	auxin response factor 8
arahy.ZE2N9E	0.916844	0.0917908	0.0111523	0.0143585	ZH16_S1	0.899884	ARF	auxin response factor 16
arahy.TXU7QT	21.4985	2.38605	3.65698	3.27307	ZH16_S1	0.829896	ARF	auxin response factor 6
arahy.2YRL0L	5.16255	0.216985	2.46956	0.558277	ZH16_S1	0.52164	ARF	auxin response factor 16
arahy.MIX90M	8.18823	3.66989	3.14339	2.70973	ZH16_S1	0.55181	ARF	auxin response factor 19
arahy.TZ3SVZ	8.64746	3.93342	1.17164	1.58677	ZH16_S1	0.545136	ARF	auxin response factor 8
arahy.1RT5K2	26.0414	2.7431	3.73825	4.05006	ZH16_S1	0.844476	ARF	auxin response factor 6
arahy.6494R5	5.95325	0.64705	2.749	0.732139	ZH16_S1	0.538235	ARF	auxin response factor 16
arahy.IZA3FR	16.7996	5.97144	5.02306	6.28181	ZH16_S1	0.626074	ARF	auxin response factor 8
arahy.ZC30QF	15.5252	2.8714	3.26401	3.03231	ZH16_S1	0.789761	ARF	auxin response factor 19
arahy.RD18JJ	13.1794	5.51675	3.2436	1.95678	ZH16_S1	0.581411	ARF	auxin response factor 19
arahy.RJA1IC	90.4633	0	0	0	ZH16_S1	1	AP2-EREBP	ethylene-responsive transcription factor 3 [Glycine max]
arahy.GIJ59W	0.233558	0	0	0	ZH16_S1	1	AP2-EREBP	ethylene-responsive transcription factor 1B
arahy.X2S259	14.0779	0.0448558	0.342707	0.2391	ZH16_S1	0.975656	AP2-EREBP	ethylene-responsive transcription factor 7-like [Glycine max]
arahy.K6QUG2	13.8449	1.77452	0.476079	0.155389	ZH16_S1	0.871829	AP2-EREBP	ethylene-responsive transcription factor 3 [Glycine max]
arahy.DY3CW6	39.4538	8.99929	13.2502	8.14375	ZH16_S1	0.664158	AP2-EREBP	ethylene-responsive transcription factor 3 [Glycine max]
arahy.F2D5GR	2.13368	0.146208	0.160548	0.154183	ZH16_S1	0.924755	AP2-EREBP	ethylene-responsive transcription factor 1B
arahy.WDSQ8J	16.333	0.020593	4.47713	3.59711	ZH16_S1	0.725884	AP2-EREBP	ethylene-responsive transcription factor
arahy.K6GECI	3.82458	0	0.222264	0.124157	ZH16_S1	0.941885	AP2-EREBP	ethylene-responsive transcription factor 13-like [Glycine max]
arahy.E9BLTS	8.9282	0.0544514	0	0	ZH16_S1	0.993901	AP2-EREBP	ethylene-responsive transcription factor 1B
arahy.0UF999	14.7166	0.0420388	1.85825	1.56123	ZH16_S1	0.873731	AP2-EREBP	ethylene-responsive transcription factor
arahy.MMJQ7K	4.38028	0.471087	0.119001	0.23299	ZH16_S1	0.892453	AP2-EREBP	ethylene-responsive transcription factor ERF003-like [Glycine max]
arahy.768P1R	0.790918	0.133613	0.0827877	0.257995	ZH16_S1	0.673804	AP2-EREBP	ethylene-responsive transcription factor 1B
arahy.0IM2G4	165.796	0	0.05187	0	ZH16_S1	0.999687	AP2-EREBP	ethylene-responsive transcription factor 3 [Glycine max]
arahy.KDI7TH	11.5552	0.650866	1.08657	1.48829	ZH16_S1	0.871202	AP2-EREBP	AP2-like ethylene-responsive transcription factor ANT-like isoform X3 [Glycine max]
arahy.DIZB8V	1.40543	0.0208632	0.0178158	0	ZH16_S1	0.985155	AP2-EREBP	ethylene-responsive transcription factor 3-like [Glycine max]
arahy.YSN9W3	16.9256	0.570533	1.98916	1.68881	ZH16_S1	0.882477	AP2-EREBP	ethylene-responsive transcription factor 3 [Glycine max]
arahy.P2THRP	17.437	0	0.0384464	0.264822	ZH16_S1	0.984813	AP2-EREBP	ethylene-responsive transcription factor 1B
arahy.EZ5RGK	3.91154	0.101117	0.0784696	0.0227536	ZH16_S1	0.974149	AP2-EREBP	ethylene-responsive transcription factor 1B
arahy.VUU22W	4.78471	0.184005	0.734508	0.247915	ZH16_S1	0.846488	AP2-EREBP	ethylene-responsive transcription factor 13-like [Glycine max]
arahy.C7A6P7	4.36897	0.0425639	0.0363468	0.0467962	ZH16_S1	0.989289	AP2-EREBP	ethylene-responsive transcription factor 1-like [Glycine max]
arahy.I2ZHTU	27.8216	0.326013	0.257067	0.167865	ZH16_S1	0.988282	AP2-EREBP	ethylene-responsive transcription factor 1B
Novel02281	0.41018	0.0234344	0	0	ZH16_S1	0.942868	AP2-EREBP	--
arahy.2Y0GDL	5.25444	0	0.0549556	0.0229788	ZH16_S1	0.989541	AP2-EREBP	ethylene-responsive transcription factor 1B
arahy.QDL5QZ	35.5729	0.600203	5.59466	1.0134	ZH16_S1	0.842727	AP2-EREBP	AP2/B3 transcription factor family protein
arahy.8V3MXA	1.4653	0	0	0	ZH16_S1	1	AP2-EREBP	ethylene-responsive transcription factor 3-like [Glycine max]
arahy.PDF2MW	13.8533	0.936621	3.75637	0.631105	ZH16_S1	0.728846	AP2-EREBP	AP2/B3 transcription factor family protein
arahy.RX34PI	35.9042	7.21558	13.9983	10.0429	ZH16_S1	0.610121	AP2-EREBP	ethylene-responsive transcription factor 3 [Glycine max]
arahy.YAEJ5M	14.1243	0.161785	0.561728	0.308369	ZH16_S1	0.96023	AP2-EREBP	ethylene-responsive transcription factor 7-like [Glycine max]
Novel05023	50.1027	1.05498	0.512017	0.145491	ZH16_S1	0.978944	AP2-EREBP	--
arahy.Y9PZ1H	6.72439	0.0446839	0	0.0570729	ZH16_S1	0.991513	AP2-EREBP	AP2-like ethylene-responsive transcription factor At1g16060-like [Glycine max]
arahy.P2AB97	1.27404	0	0	0.117972	ZH16_S1	0.907403	AP2-EREBP	ethylene-responsive transcription factor 3-like [Glycine max]
arahy.CSV6ZK	1.10404	0.0247436	0.125381	0.131894	ZH16_S1	0.880535	AP2-EREBP	ethylene-responsive transcription factor 7-like [Glycine max]
arahy.X1U4MM	71.0294	8.26876	2.12814	2.10022	ZH16_S1	0.883587	ABI3VP1	auxin response factor 6
arahy.H2NMKM	118.935	9.50069	4.30849	4.24505	ZH16_S1	0.920119	ABI3VP1	auxin response factor 6
arahy.PNEU8V	0.604015	0.264844	0.0334511	0.0207143	ZH16_S1	0.561528	ABI3VP1	plant-specific B3-DNA-binding domain protein
arahy.TW50GZ	0.705846	0	0.032057	0	ZH16_S1	0.954584	ABI3VP1	plant-specific B3-DNA-binding domain protein
arahy.26UNPR	308.163	2.34747	18.5462	18.1369	ZH16_S1	0.939817	--	protein YLS7-like [Glycine max]
arahy.DMI4PH	8.53602	1.93958	2.10238	3.40086	ZH16_S1	0.601587	--	Unknown protein
arahy.R8GU4C	4.62581	1.23813	1.4412	1.09468	ZH16_S1	0.688443	--	Core-2/I-branching beta-1,6-N-acetylglucosaminyltransferase family protein
arahy.UG6FLW	39.6134	5.65386	2.05991	1.37171	ZH16_S1	0.857274	--	Myosin heavy chain-related protein
arahy.80E1MB	5.47171	0	0.164153	0	ZH16_S1	0.97	--	SAUR-like auxin-responsive protein family
Novel02910	2.67715	0.254443	0.255558	0.0347497	ZH16_S1	0.904541	--	--
arahy.W7ULQG	0.459533	0.0248138	0	0	ZH16_S1	0.946002	--	UDP-Glycosyltransferase superfamily protein
Novel00098	11.818	3.48099	0.670963	0.616331	ZH16_S1	0.70545	--	--
arahy.DE35CE	14.9042	0	0.111899	0	ZH16_S1	0.992492	--	SAUR-like auxin-responsive protein family
arahy.GEM3QE	24.851	6.13926	3.10657	3.25137	ZH16_S1	0.752957	--	uncharacterized vacuolar membrane protein YML018C-like isoform X1 [Glycine max]
arahy.Q49AMZ	0.325543	0	0.049143	0	ZH16_S1	0.849043	--	serine/threonine-protein phosphatase 7 long form homolog [Glycine max]
arahy.LFL6K6	496.136	18.6365	13.139	15.4352	ZH16_S1	0.962437	--	lipid transfer protein 3
arahy.PR6200	4.91235	1.30541	1.0751	1.64937	ZH16_S1	0.66424	--	F-box protein interaction domain protein
arahy.RGBH4Y	5.5474	0.293769	0.611244	0.571388	ZH16_S1	0.889814	--	Heavy metal transport/detoxification superfamily protein
arahy.U4ADFF	1.76373	0.0784028	0.368195	0.208453	ZH16_S1	0.791241	--	Protein kinase superfamily protein
arahy.V34G3Y	25.7148	10.0656	4.74228	4.18622	ZH16_S1	0.608567	--	Unknown protein
arahy.28RV6S	5.11954	2.51444	1.9256	1.68345	ZH16_S1	0.508854	--	hydroxymethylglutaryl-CoA synthase-like [Glycine max]
arahy.50D6TG	14.8282	4.52993	3.55422	3.2212	ZH16_S1	0.694506	--	BTB/POZ domain-containing protein NPY2-like isoform X3 [Glycine max]
arahy.B845YX	60.6295	12.3366	8.01411	9.56439	ZH16_S1	0.796524	--	MATE efflux family protein
arahy.0BD95F	1.83865	0.456364	0.266724	0.259046	ZH16_S1	0.751794	--	Unknown protein
Novel01515	1.31172	0.278576	0.225971	0.170403	ZH16_S1	0.787626	--	--
arahy.Q6YSSX	0.25412	0	0	0	ZH16_S1	1	--	Zinc knuckle family protein n=1 Tax=Oryza sativa subsp. japonica RepID=H2KW38_ORYSJ
arahy.HVHQ42	2.93019	0	0	0	ZH16_S1	1	--	choline kinase 1
arahy.J7B9GC	0.284409	0	0	0	ZH16_S1	1	--	PLANT CADMIUM RESISTANCE 2
arahy.8KGB21	11.2811	0.690756	0.588016	2.16456	ZH16_S1	0.808125	--	Eukaryotic aspartyl protease family protein
arahy.WI67VP	469.848	157.633	166.564	157.723	ZH16_S1	0.645493	--	cysteine proteinase inhibitor 1 [Glycine max]
arahy.31PXUJ	0.386841	0	0	0	ZH16_S1	1	--	Protein phosphatase 2C family protein
arahy.HLS3VZ	54.3594	7.27917	1.66847	1.96347	ZH16_S1	0.866092	--	soluble inorganic pyrophosphatase
arahy.ZSL9VF	0.113164	0.0150613	0	0	ZH16_S1	0.866907	--	MA3 domain-containing protein
arahy.9NB33V	0.299813	0.142651	0.0191766	0.0573659	ZH16_S1	0.524199	--	Ankyrin repeat family protein
arahy.Q4QPDX	29.6523	11.8325	4.6832	3.22055	ZH16_S1	0.600957	--	O-acetyltransferase family protein
arahy.71J8LW	4.77307	2.22221	1.5884	1.11435	ZH16_S1	0.534427	--	cation-chloride co-transporter 1
arahy.UQN5NZ	0.107386	0	0	0	ZH16_S1	1	--	Uncharacterised protein family (UPF0497)
arahy.HLUA2X	21.6534	9.10871	5.05556	3.82345	ZH16_S1	0.579341	--	NAD-dependent malic enzyme 1
arahy.X563NF	0.988554	0.457077	0	0	ZH16_S1	0.53763	--	NADP-dependent alkenal double bond reductase
arahy.SHPC4Z	15.3174	6.16015	4.69212	5.0436	ZH16_S1	0.597834	--	myosin 2
arahy.IY78PD	1.56893	0	0	0.0412632	ZH16_S1	0.9737	--	Unknown protein
arahy.MZCS2R	97.1613	11.4138	17.8162	17.3346	ZH16_S1	0.816632	--	Bifunctional polymyxin resistance arnA protein n=2 Tax=Papilionoideae RepID=G7JIF7_MEDTR
arahy.SK03LI	26.3837	12.5025	8.59906	6.37979	ZH16_S1	0.526125	--	glutathione peroxidase 4
arahy.D0V14N	6.6527	0.501383	0.460345	0.389361	ZH16_S1	0.924635	--	UBX domain-containing protein
arahy.J580FK	66.2407	23.7352	14.2947	13.3123	ZH16_S1	0.641682	--	protein IQ-DOMAIN 14-like isoform X2 [Glycine max]
arahy.YEM7S9	18.6271	5.66868	1.86777	0.614787	ZH16_S1	0.695676	--	Peroxidase superfamily protein
arahy.0DZ072	0.140059	0.0117133	0	0	ZH16_S1	0.916369	--	disease resistance protein [Glycine max]
arahy.R5QH0H	0.55872	0.11247	0.222431	0	ZH16_S1	0.601892	--	Auxin efflux carrier family protein
arahy.I66GUF	8.70162	0.465885	2.74918	2.98224	ZH16_S1	0.657278	--	senescence-associated protein, putative
arahy.WE6MWD	9.45633	1.49057	0.918889	1.07558	ZH16_S1	0.842373	--	glutamate dehydrogenase 1
arahy.8ZHK7B	32.6289	12.381	3.19114	3.53374	ZH16_S1	0.620551	--	Nucleotide-sugar transporter/ sugar porter n=3 Tax=Zea mays RepID=B6UBN6_MAIZE
arahy.URL2CG	8.96788	3.6393	3.94696	2.74458	ZH16_S1	0.559878	--	vacuolar protein-sorting-associated protein 37 homolog 1-like [Glycine max]
arahy.WLZ7Z3	16.5836	6.92566	1.39713	1.08377	ZH16_S1	0.58238	--	fatty acid desaturase 8
arahy.TIU0MY	11.5924	4.68826	3.77111	3.91386	ZH16_S1	0.595575	--	NRAMP metal ion transporter 2
arahy.91ADXD	6.52553	0.256641	2.56481	1.02121	ZH16_S1	0.606957	--	alpha dioxygenase
arahy.GBW8AP	1.64799	0.126872	0.0841716	0.191122	ZH16_S1	0.884028	--	Late embryogenesis abundant hydroxyproline-rich glycoprotein family isoform 1 n=1 Tax=Theobroma cacao RepID=UPI00042B716C
arahy.YMN08X	255.807	89.6354	125.956	51.2076	ZH16_S1	0.507614	--	SPIRAL1-like1
arahy.5ELN25	37.938	0	0.0351289	0	ZH16_S1	0.999074	--	probable pectinesterase/pectinesterase inhibitor 21-like [Glycine max]
arahy.BRAD7V	0.370451	0	0.0335321	0	ZH16_S1	0.909483	--	nucleolin 1-like [Glycine max]
arahy.52KDTF	31.9127	13.1349	7.6759	7.16544	ZH16_S1	0.588413	--	alpha-glucan water dikinase
arahy.A3AWFZ	43.3433	9.73066	5.87444	5.26221	ZH16_S1	0.775498	--	Integral membrane Yip1 family protein
arahy.HXC8TF	21.3556	7.51564	2.16458	1.27584	ZH16_S1	0.648071	--	calcium-transporting ATPase 4, plasma membrane-type protein
arahy.56WBIF	0.849247	0	0	0	ZH16_S1	1	--	Adenine nucleotide alpha hydrolases-like superfamily protein
arahy.DLXF41	13.1655	0.724677	1.04226	0.148717	ZH16_S1	0.920834	--	blue copper protein-like [Glycine max]
arahy.70MDEI	0.31949	0	0.110139	0	ZH16_S1	0.655265	--	Unknown protein
arahy.YP19K2	66.397	20.1636	13.7808	18.1801	ZH16_S1	0.696317	--	unknown protein
arahy.YRK7KB	30.8567	7.1775	5.59048	2.16789	ZH16_S1	0.767393	--	Succinyl-CoA ligase, alpha subunit
arahy.2Z03QX	46.8625	22.7846	8.61279	11.6806	ZH16_S1	0.513798	--	uncharacterized protein LOC100305529 isoform X2 [Glycine max]
arahy.F1TUFL	263.695	4.80143	24.8396	20.9674	ZH16_S1	0.905802	--	Gibberellin-regulated family protein
arahy.1N783C	6.10629	0.21315	0.220914	0.286153	ZH16_S1	0.953138	--	18.1 kDa class I heat shock protein-like [Glycine max]
arahy.SA7FDN	0.193788	0	0	0	ZH16_S1	1	--	golgin candidate 5
arahy.HW27AX	1.02165	0	0	0	ZH16_S1	1	--	probable sugar phosphate/phosphate translocator [Glycine max]
arahy.R6C5BS	19.4867	4.99237	4.17608	3.192	ZH16_S1	0.743807	--	lysosomal beta glucosidase-like isoform X4 [Glycine max]
arahy.97KQTU	32.8861	9.34791	4.49942	3.13549	ZH16_S1	0.715748	--	Unknown protein
arahy.F7AUT2	14.7361	5.93625	0.530966	0.0724934	ZH16_S1	0.597163	--	gibberellin 20 oxidase 2-like [Glycine max]
arahy.I6Q85W	12.0311	1.49244	1.4689	0.403739	ZH16_S1	0.875952	--	Avr9/Cf-9 rapidly elicited protein
arahy.W5W2QE	6.34974	0.359954	1.08433	1.216	ZH16_S1	0.808496	--	rho GDP-dissociation inhibitor 1-like [Glycine max]
arahy.RW8FUD	3.46928	1.06005	0	0.0613847	ZH16_S1	0.694447	--	Heavy metal transport/detoxification superfamily protein
arahy.PCN789	4.29895	0.749053	0.818139	0.927293	ZH16_S1	0.784298	--	senescence-associated protein
arahy.LEI4AX	4.07807	0.329457	0.1196	0.461692	ZH16_S1	0.886786	--	uncharacterized protein LOC100797471 isoform X3 [Glycine max]
arahy.N1E5J3	29.8901	4.26148	4.8834	6.33944	ZH16_S1	0.787908	--	phloem protein 2-B2
arahy.T6QC8B	58.4925	9.61264	7.6507	5.37264	ZH16_S1	0.83566	--	phosphoethanolamine N-methyltransferase
arahy.H5H05M	25.543	10.6759	5.9957	2.49986	ZH16_S1	0.582043	--	allene oxide cyclase 3
arahy.17BKMA	0.891229	0.0181753	0.0322694	0	ZH16_S1	0.963792	--	phosphate transporter 1
arahy.D6TL18	1.24936	0	0	0	ZH16_S1	1	--	spermidine hydroxycinnamoyl transferase-like [Glycine max]
arahy.A2R99Z	0.114553	0	0	0	ZH16_S1	1	--	Peroxidase superfamily protein
arahy.08H2K0	4.45882	1.78998	0.257587	0.291491	ZH16_S1	0.598553	--	asparagine synthetase 3
arahy.TFW9WI	0.400265	0	0	0	ZH16_S1	1	--	chalcone synthase-like [Glycine max]
arahy.GX1WML	46.3204	5.24583	14.0035	14.3827	ZH16_S1	0.689496	--	MLO-like protein 13-like [Glycine max]
arahy.MD6CKA	2.72451	0.0897116	0.271159	0.123538	ZH16_S1	0.900474	--	thioredoxin 2
arahy.T4YGUP	0.358735	0.132528	0	0.0728532	ZH16_S1	0.630567	--	unknown protein
arahy.BVUT3K	11.9106	2.75141	2.20784	0.536346	ZH16_S1	0.768994	--	SAUR-like auxin-responsive protein family
arahy.UD5THM	3.87612	1.42634	1.73952	1.70966	ZH16_S1	0.551221	--	Unknown protein
arahy.5FG7TI	88.9378	3.83229	1.23277	2.38919	ZH16_S1	0.95691	--	Transmembrane amino acid transporter family protein
arahy.6IQ3WR	0.760814	0.0140682	0	0	ZH16_S1	0.981509	--	cation/H+ exchanger 3
arahy.QD5JHM	212.797	77.4031	56.2619	25.9021	ZH16_S1	0.636259	--	Hypoxia-responsive family protein
arahy.TK6Q6V	21.1772	0.168251	0.133508	0	ZH16_S1	0.992055	--	transmembrane amino acid transporter family protein
arahy.BS0ST2	0.552181	0	0	0	ZH16_S1	1	--	Aquaporin-like superfamily protein
arahy.K7GDTJ	0.136206	0.0383671	0.0444307	0.0146183	ZH16_S1	0.673798	--	disease resistance protein (TIR-NBS-LRR class), putative
arahy.GCX8RD	0.809187	0	0	0	ZH16_S1	1	--	putative ribonuclease H protein At1g65750-like [Glycine max]
arahy.ULK9GC	30.204	14.0783	8.41775	9.1942	ZH16_S1	0.533893	--	Protein kinase superfamily protein
arahy.G84CIW	4.50157	0	0	0	ZH16_S1	1	--	glycerol-3-phosphate acyltransferase 6
arahy.4WNI95	0.225099	0.0636715	0	0.0350013	ZH16_S1	0.71714	--	Unknown protein
arahy.0M6VMZ	0.182211	0	0	0	ZH16_S1	1	--	Dof-type zinc finger DNA-binding family protein
arahy.F0QQQY	2.86513	0.0541554	0.472982	0.0729654	ZH16_S1	0.834918	--	Glucose-1-phosphate adenylyltransferase family protein
arahy.1ING2C	0.192137	0.0465248	0	0.0157873	ZH16_S1	0.757855	--	receptor-like protein kinase 2
arahy.ATW5XU	5.27034	0.367394	0.726958	0.409376	ZH16_S1	0.862066	--	cation/H+ exchanger 20
arahy.W2KP9A	158.225	0.0454187	0.696171	0.554846	ZH16_S1	0.9956	--	Integral membrane protein n=1 Tax=Beta vulgaris RepID=Q39416_BETVU
arahy.SM0BS0	6.36489	0.746365	2.30938	2.45443	ZH16_S1	0.614381	--	uncharacterized protein LOC100811424 isoform X5 [Glycine max]
Novel03165	33.5838	4.62578	6.54132	3.88951	ZH16_S1	0.805224	--	--
Novel00533	2.39079	0.918853	0.350856	0.656057	ZH16_S1	0.615669	--	--
arahy.ZW6KD7	0.198267	0.0596547	0.0509414	0	ZH16_S1	0.699119	--	dnaJ homolog subfamily B member 1-like [Glycine max]
arahy.NN0MCR	71.5862	5.53312	3.6341	2.66368	ZH16_S1	0.922707	--	transport inhibitor response 1-like protein-like [Glycine max]
arahy.UD8U5Y	33.6093	11.3885	3.43693	3.57729	ZH16_S1	0.661151	--	Nucleotide-sugar transporter/ sugar porter n=3 Tax=Zea mays RepID=B6UBN6_MAIZE
Novel01406	0.495348	0.113639	0.0654162	0.10526	ZH16_S1	0.770588	--	--
arahy.94DDXG	10.0558	2.84931	0.522489	0.0877685	ZH16_S1	0.716649	--	NADPH:quinone oxidoreductase
arahy.EZLY4J	2.79335	0	0.559627	0.0495064	ZH16_S1	0.799657	--	expansin-like B1
arahy.XR8H09	4.31089	0.740604	0.630618	0.405335	ZH16_S1	0.828202	--	Calcium/calmodulin-dependent serine/threonine-protein kinase 1 n=5 Tax=Oryza RepID=CAMK1_ORYSJ
arahy.K7D9EI	1.76583	0.237042	0.331756	0.0754229	ZH16_S1	0.812124	--	titin-like [Glycine max]
arahy.LKBY4F	11.9135	0	0	0	ZH16_S1	1	--	hypothetical protein
arahy.QU6Z4C	0.365185	0.17534	0	0.167371	ZH16_S1	0.51986	--	uncharacterized protein LOC100783390 isoform X3 [Glycine max]
arahy.374HIW	38.2233	13.95	4.21894	8.46465	ZH16_S1	0.635038	--	DnaJ-like protein [Glycine max]
arahy.FQX7TC	21.9616	1.18956	2.63487	1.02907	ZH16_S1	0.880024	--	Unknown protein
arahy.4T5ENZ	32.6918	0.812388	0.885533	1.41653	ZH16_S1	0.95667	--	myosin 1
arahy.C0A8IS	0.463108	0	0	0	ZH16_S1	1	--	Unknown protein
arahy.PISI89	0.150492	0	0	0	ZH16_S1	1	--	SNARE associated Golgi protein family
arahy.FXE6GW	1.26191	0	0.0118138	0	ZH16_S1	0.990638	--	terpene synthase 14
arahy.S5VJ64	1.82259	0.21796	0.127936	0.48808	ZH16_S1	0.732205	--	RING zinc finger protein, putative
arahy.G66SVD	1.34888	0.47561	0.593847	0.307821	ZH16_S1	0.559749	--	sec23/sec24 transport family protein
arahy.0GVW71	32.4367	8.56269	6.26944	5.41335	ZH16_S1	0.736018	--	U-box domain-containing protein 11-like [Glycine max]
arahy.72KEI0	0.49084	0	0	0	ZH16_S1	1	--	pyruvate decarboxylase-2
arahy.00B185	114.525	5.93419	14.2582	13.4576	ZH16_S1	0.875501	--	beta galactosidase 1
arahy.BV4TL7	30.0202	10.7668	9.85646	7.48804	ZH16_S1	0.641348	--	D-ribulose-5-phosphate-3-epimerase
arahy.CSEA65	0.71826	0.193545	0.0683373	0	ZH16_S1	0.730536	--	Unknown protein
arahy.MR6WYG	27.7701	0.65556	1.25392	0.261743	ZH16_S1	0.954847	--	cytochrome P450, family 718
arahy.ZUG4EU	13.8615	6.224	3.85843	2.82852	ZH16_S1	0.550985	--	oxidoreductase, 2OG-Fe(II) oxygenase family protein
arahy.VH0R1T	25.6663	5.05148	5.54709	5.61406	ZH16_S1	0.781267	--	Unknown protein
arahy.590LKT	0.102853	0	0	0	ZH16_S1	1	--	dehydrodolichyl diphosphate synthase 2-like [Glycine max]
arahy.ZIU9VW	28.7586	7.27574	4.83723	2.5684	ZH16_S1	0.747006	--	Protein kinase superfamily protein
arahy.GZ0G6J	83.5781	0.618328	14.3258	10.7279	ZH16_S1	0.828594	--	OTU-like cysteine protease
arahy.WHVZ2S	1.13565	0.0848182	0.108644	0.0541674	ZH16_S1	0.904333	--	Protein kinase superfamily protein
arahy.230XUM	14.603	3.68911	3.2142	3.19527	ZH16_S1	0.747374	--	RNA-binding protein 1-like [Glycine max]
arahy.PFQ45M	94.7822	10.9738	5.4212	3.06111	ZH16_S1	0.884221	--	Citrate synthase family protein
arahy.DA0PX7	5.99935	1.39614	0.0878377	0.045233	ZH16_S1	0.767284	--	sulfate transporter 1
arahy.S4MMCZ	12.8146	2.65505	3.05124	1.92708	ZH16_S1	0.761894	--	beta-1,4-xylosyltransferase, putative
arahy.Y18RHQ	38.5914	0.209233	0.0166911	0.046455	ZH16_S1	0.994578	--	NAD(P)-binding Rossmann-fold superfamily protein
arahy.NDL7Z2	105.894	43.4929	30.9291	19.973	ZH16_S1	0.58928	--	acetyl-CoA acetyltransferase, cytosolic 1-like isoform X2 [Glycine max]
arahy.0QV8DZ	2.17502	0.934449	0.879298	0.492855	ZH16_S1	0.570372	--	uncharacterized protein LOC102666946 isoform X4 [Glycine max]
arahy.QZ4B98	0.350338	0	0	0	ZH16_S1	1	--	Unknown protein
arahy.D04CBC	7.77283	2.35343	2.53209	1.8829	ZH16_S1	0.674238	--	Rab GTPase activator
arahy.VU0ITX	36.0479	0.21588	0.430654	0.23502	ZH16_S1	0.988053	--	O-acyltransferase (WSD1-like) family protein
arahy.J2YHHP	93.3773	28.4807	14.8725	5.71528	ZH16_S1	0.694993	--	delta(24)-sterol reductase-like protein
arahy.L7CY27	42.2716	18.759	6.04345	4.00434	ZH16_S1	0.556226	--	hypothetical protein
arahy.CP6VIJ	18.9635	3.4077	2.88128	2.64554	ZH16_S1	0.820303	--	E3 ubiquitin-protein ligase RGLG2-like isoform X4 [Glycine max]
arahy.WFM3MS	0.1004	0	0	0.0274564	ZH16_S1	0.726528	--	Cytochrome P450 superfamily protein
arahy.N1UDB5	23.7058	1.71096	0.801006	1.05654	ZH16_S1	0.927825	--	SAUR-like auxin-responsive protein family
arahy.AR5SA1	28	6.19078	5.94923	9.67325	ZH16_S1	0.654527	--	Core-2/I-branching beta-1,6-N-acetylglucosaminyltransferase family protein
arahy.4GF8V7	315.914	0.835504	0.204715	0.0684796	ZH16_S1	0.997355	--	1-aminocyclopropane-1-carboxylate oxidase
arahy.H9ZQVQ	0.106745	0.0406359	0.0347005	0	ZH16_S1	0.619318	--	Unknown protein
arahy.L0R0IL	601.151	30.7232	8.01254	7.54586	ZH16_S1	0.948893	--	Non-specific lipid-transfer protein, putative
arahy.NZL2UA	94.7018	2.2021	0.935095	0.296426	ZH16_S1	0.976747	--	probable xyloglucan glycosyltransferase 5-like [Glycine max]
arahy.TJZR4S	0.231694	0.0359769	0.030722	0	ZH16_S1	0.844722	--	Tryptophan/tyrosine permease
arahy.A6Q8V1	20.7741	2.70486	0.630073	0.302764	ZH16_S1	0.869797	--	unknown protein
arahy.DCC0MI	30.6508	6.18898	2.35932	1.81513	ZH16_S1	0.798081	--	beta galactosidase 1
arahy.R571P7	2.04288	0	0	0	ZH16_S1	1	--	xyloglucan endotransglucosylase/hydrolase 16
Novel01904	62.8977	20.5475	7.53135	5.09479	ZH16_S1	0.673319	--	--
arahy.YL00Q2	5.0683	0.283801	1.21955	0.829667	ZH16_S1	0.759378	--	receptor-like kinase 1
arahy.G7BP07	0.962512	0	0	0	ZH16_S1	1	--	Sec14p-like phosphatidylinositol transfer family protein
arahy.Z0KP5S	1.11091	0	0	0	ZH16_S1	1	--	myosin heavy chain-related
arahy.2QB43J	0.621401	0.173445	0.0227558	0.0297499	ZH16_S1	0.72088	--	receptor-like protein kinase 2
arahy.U5WKYJ	7.28389	0.446131	0.301798	0.0761421	ZH16_S1	0.938751	--	allene oxide synthase
arahy.QKB3E6	18.9567	4.25752	1.66888	1.4454	ZH16_S1	0.775408	--	alanine-tRNA ligases
arahy.PBP7IS	18.0527	8.48825	5.53226	4.73157	ZH16_S1	0.529809	--	oxidoreductase, zinc-binding dehydrogenase family protein
arahy.EDF5ZB	14.6797	6.40523	4.35701	3.89148	ZH16_S1	0.563668	--	probable sugar phosphate/phosphate translocator [Glycine max]
arahy.QTG4QH	0.193461	0	0	0	ZH16_S1	1	--	Core-2/I-branching beta-1,6-N-acetylglucosaminyltransferase family protein
arahy.845W93	79.2072	29.948	8.78879	9.34713	ZH16_S1	0.621903	--	Nucleotide-sugar transporter family protein
arahy.XJC9R2	1.16172	0	0.121521	0	ZH16_S1	0.895396	--	beta-galactosidase 16
arahy.KSLX5N	0.261054	0.103813	0.0468538	0	ZH16_S1	0.602332	--	transmembrane 9 superfamily member 3-like [Glycine max]
arahy.BB0AZK	0.137549	0.0281476	0.0352606	0	ZH16_S1	0.743651	--	syntaxin, putative
arahy.24IXRB	34.9801	3.22812	2.73009	3.58982	ZH16_S1	0.897375	--	protein YLS7-like [Glycine max]
arahy.WWI603	1.35878	0.347283	0.295885	0.144299	ZH16_S1	0.744416	--	uncharacterized protein LOC100788333 isoform X5 [Glycine max]
arahy.96UBDB	36.2334	9.2805	2.77594	1.34376	ZH16_S1	0.743869	--	chorismate mutase 2
arahy.BSNJ2C	0.821222	0.0349177	0.12163	0.378461	ZH16_S1	0.539149	--	photosynthetic electron transfer B chrC:74841-76292 FORWARD
arahy.HCI8A4	5.61046	1.12195	1.08494	0.792217	ZH16_S1	0.800024	--	WD repeat-containing protein 44-like [Glycine max]
arahy.UM33GY	19.1279	0	0	0	ZH16_S1	1	--	SAUR-like auxin-responsive protein family
Novel03406	10.3055	1.30926	1.31073	0.839879	ZH16_S1	0.872813	--	--
arahy.1WCV8C	11.1018	2.40036	4.07788	1.89416	ZH16_S1	0.632684	--	Glycosyltransferase family 61 protein
arahy.D7EMLG	0.102119	0	0	0	ZH16_S1	1	--	uncharacterized protein LOC102662187 [Glycine max]
arahy.JZIS5A	10.38	2.25781	2.27651	0.524294	ZH16_S1	0.780684	--	Phosphoglycerate mutase family protein
arahy.FGA0WN	1.30075	0	0.0335595	0	ZH16_S1	0.9742	--	glyoxal oxidase-related protein
arahy.R7PSBK	10.5463	0.17477	0.0888159	0.095691	ZH16_S1	0.983428	--	GTP-binding nuclear protein Ran-3 [Glycine max]
arahy.B1R1KQ	92.0095	7.70179	5.36286	2.43051	ZH16_S1	0.916294	--	Cell wall protein EXP2 n=1 Tax=Mirabilis jalapa RepID=Q84L40_MIRJA
arahy.D53E9A	2.02581	0.573323	0.60176	0.483396	ZH16_S1	0.702954	--	uncharacterized protein LOC100788333 isoform X5 [Glycine max]
arahy.534T08	0.112074	0	0	0	ZH16_S1	1	--	Retrotransposable element Tf2 155 kDa protein type 1 n=1 Tax=Thanatephorus cucumeris (strain AG1-IB / isolate 7/3/14) RepID=M5CBA4_THACB
arahy.CN40UY	12.567	1.62643	2.92586	2.49727	ZH16_S1	0.76718	--	RING-H2 finger protein 2B
arahy.GR4ZGT	1.20641	0.539225	0.402737	0.209611	ZH16_S1	0.553033	--	Auxin efflux carrier family protein
arahy.NX75ZF	22.1147	5.02707	1.77967	1.55039	ZH16_S1	0.772682	--	uncharacterized protein LOC100783018 [Glycine max]
arahy.0UJ9QK	0.491652	0	0	0.167694	ZH16_S1	0.658916	--	cytochrome C biogenesis protein CcmFC protein
arahy.Q3A75N	0.124234	0.0429822	0.0538438	0	ZH16_S1	0.566595	--	tetratricopeptide repeat protein 4 homolog isoform X2 [Glycine max]
arahy.80FISQ	9.32207	0.316544	0.0614473	0.0745112	ZH16_S1	0.966044	--	external alternative NAD(P)H-ubiquinone oxidoreductase B2, mitochondrial-like isoform X2 [Glycine max]
arahy.G0J8BA	0.319158	0	0.0132964	0	ZH16_S1	0.958339	--	receptor kinase 3
arahy.TY26DT	0.243669	0.0975127	0.0138128	0.0206602	ZH16_S1	0.599814	--	structural constituent of ribosome
arahy.2Q5L9E	2.04222	0.313211	0.130625	0.193222	ZH16_S1	0.846632	--	DUF241 domain protein
arahy.PKFN9U	277.589	24.6915	8.34533	4.1513	ZH16_S1	0.91105	--	endoglucanase 6-like [Glycine max]
arahy.FXK9PR	9.94615	0	0.21125	0	ZH16_S1	0.978761	--	uncharacterized protein LOC100527473 [Glycine max]
arahy.3A5YKQ	1.84265	0	0.104702	0.259362	ZH16_S1	0.859245	--	protein FANTASTIC FOUR 3-like [Glycine max]
arahy.G7DPQJ	0.298763	0.0613641	0	0	ZH16_S1	0.794606	--	endoglucanase 25-like [Glycine max]
arahy.EN81KK	114.545	45.83	26.0349	18.6586	ZH16_S1	0.599895	--	cytochrome B-c1 complex subunit 6
arahy.Z50VDZ	128.392	24.8363	12.249	8.75475	ZH16_S1	0.806559	--	cytochrome c-2
arahy.R19W3K	0.43942	0.0203179	0.17121	0.126586	ZH16_S1	0.610372	--	lycopene cyclase
Novel04721	6.2538	2.80636	3.01558	2.70971	ZH16_S1	0.5178	--	--
arahy.XTU872	6.90037	0.123384	0.116225	0.0290094	ZH16_S1	0.982119	--	Plasma membrane mannitol transporter n=1 Tax=Arachis hypogaea RepID=B2Z3Y4_ARAHY
arahy.WLQA50	7.51502	2.17813	0.0467758	0	ZH16_S1	0.710163	--	lysosomal beta glucosidase-like isoform X1 [Glycine max]
arahy.P8Q0JH	0.253918	0	0	0	ZH16_S1	1	--	sulfate transporter 3
arahy.1YIR2K	0.27677	0.0552488	0.064169	0	ZH16_S1	0.76815	--	laccase 10
arahy.PF0HW7	0.466523	0	0	0	ZH16_S1	1	--	ROP-interactive CRIB motif-containing protein 6
arahy.T59H3J	0.191849	0	0	0	ZH16_S1	1	--	cytochrome b559 subunit alpha
arahy.T1UA0C	2.94573	0.226936	0.294744	0.0895179	ZH16_S1	0.899942	--	phospholipase D P2
arahy.QM1PW2	7.91515	0	0.0339233	0	ZH16_S1	0.995714	--	lipase 1
arahy.76PVGY	3.51475	0.202629	0.307421	0.255373	ZH16_S1	0.912534	--	uncharacterized protein LOC100796572 [Glycine max]
arahy.DAE2HF	26.7196	3.58978	0.802327	0.461363	ZH16_S1	0.86565	--	beta-D-xylosidase 4
arahy.WJM3KC	4.83683	0.0202006	0.0358653	0	ZH16_S1	0.992585	--	Unknown protein
arahy.DC2STY	0.201185	0	0	0	ZH16_S1	1	--	Unknown protein
arahy.6G1AZV	0.467549	0.1383	0.2103	0.165447	ZH16_S1	0.550208	--	homeobox protein LUMINIDEPENDENS-like [Glycine max]
arahy.JA1EPG	23.3373	4.50428	1.75139	0.677725	ZH16_S1	0.806992	--	glucan endo-1,3-beta-glucosidase [Glycine max]
arahy.R1GQBP	24.656	11.5182	8.78541	8.11533	ZH16_S1	0.532846	--	putative ribonuclease H protein At1g65750-like [Glycine max]
arahy.SDZN59	47.1565	12.1792	12.7855	13.7507	ZH16_S1	0.708403	--	cell number regulator 8-like [Glycine max]
arahy.1YV20X	41.7828	13.986	10.8258	8.06382	ZH16_S1	0.665268	--	chloride channel C
arahy.EYNG7S	24.6508	6.39304	3.85585	2.21336	ZH16_S1	0.740656	--	Pollen Ole e 1 allergen and extensin family protein
arahy.D0QZQ6	1.254	0.171725	0.4937	0.262274	ZH16_S1	0.606299	--	equilibrative nucleoside transporter 6
arahy.PA307L	6.17274	0.584996	2.69272	1.4688	ZH16_S1	0.563772	--	probable carboxylesterase 2-like [Glycine max]
arahy.59PC4W	1.66694	0	0.178021	0.108617	ZH16_S1	0.893205	--	GDSL-like Lipase/Acylhydrolase superfamily protein
arahy.04F84Q	0.673355	0.0298698	0.0749483	0.0553111	ZH16_S1	0.888694	--	linoleate 13S-lipoxygenase 2-1, related protein
arahy.SDY5DC	0.734328	0	0	0	ZH16_S1	1	--	WD repeat-containing protein 3-like [Glycine max]
arahy.CY7VGA	0.196979	0	0.0885432	0	ZH16_S1	0.550494	--	senescence-associated protein, putative
arahy.PB1D04	13.3874	1.47817	0.640219	0.0425806	ZH16_S1	0.889586	--	3-ketoacyl-CoA synthase 12
arahy.Q0CWXY	34.469	6.93332	4.98894	2.17384	ZH16_S1	0.798854	--	uncharacterized protein LOC100791257 [Glycine max]
arahy.K2SWWG	89.6013	0.192592	1.77477	0.284553	ZH16_S1	0.980193	--	kunitz trypsin inhibitor 1
arahy.ZMPK13	0.744716	0	0	0.149976	ZH16_S1	0.798613	--	Sugar transporter SWEET n=3 Tax=Citrus RepID=V4TK53_9ROSI
arahy.8Y4PDX	9.29458	1.1971	2.30193	1.88874	ZH16_S1	0.752336	--	beta glucosidase 17
arahy.XIC2ZC	0.156491	0	0	0	ZH16_S1	1	--	cyclic nucleotide-gated ion channel-like protein
arahy.GLEC2S	5.9227	2.8549	1.19864	0.947778	ZH16_S1	0.517974	--	mitochondrial substrate carrier family protein B-like [Glycine max]
arahy.9PT08I	0.264377	0.11086	0.029482	0.0212093	ZH16_S1	0.580675	--	L-ascorbate oxidase [Glycine max]
arahy.AD2HDF	5.31838	0.140512	0	0	ZH16_S1	0.97358	--	SAUR-like auxin-responsive protein family
arahy.1X72NK	0.387619	0	0	0	ZH16_S1	1	--	D-arabinono-1,4-lactone oxidase family protein
arahy.4F85GC	0.12075	0.00973769	0	0.0107059	ZH16_S1	0.911338	--	receptor-like protein kinase 4
arahy.9QS057	153.4	44.7444	38.6093	36.0607	ZH16_S1	0.708315	--	Sugar transporter SWEET n=3 Tax=Solanum RepID=M1CBD6_SOLTU
arahy.8015QX	1.71821	0	0	0	ZH16_S1	1	--	probable carboxylesterase 12-like [Glycine max]
arahy.Y4QJ2G	8.77944	2.72057	3.20219	1.12499	ZH16_S1	0.635262	--	copper transporter 2
arahy.CD0F2D	0.406193	0	0	0.0145469	ZH16_S1	0.964187	--	disease resistance protein
arahy.I9WHAY	64.2201	20.8851	21.4672	15.0142	ZH16_S1	0.665725	--	unknown protein
arahy.RCMT0A	0.287915	0	0	0	ZH16_S1	1	--	transmembrane amino acid transporter family protein
arahy.YRN4PU	4.18716	0.24917	0.0712004	0.0333954	ZH16_S1	0.940492	--	external alternative NAD(P)H-ubiquinone oxidoreductase B2, mitochondrial-like isoform X1 [Glycine max]
arahy.X5SRIL	34.1331	4.15689	11.1565	4.22647	ZH16_S1	0.673148	--	acyl-CoA-binding protein 6
arahy.JSZB3T	20.6748	10.0212	9.84913	7.54865	ZH16_S1	0.515295	--	thioredoxin domain-containing protein 9 homolog
arahy.4W1HTH	0.124405	0	0	0	ZH16_S1	1	--	unknown protein
arahy.P7R2PY	0.640418	0	0	0	ZH16_S1	1	--	Peroxidase superfamily protein
arahy.HIWA31	13.8847	3.13826	5.45029	4.03879	ZH16_S1	0.60746	--	protein kinase family protein
arahy.X978JA	11.0369	1.43597	2.80551	1.92792	ZH16_S1	0.745806	--	Protein kinase superfamily protein
arahy.92IF5I	17.8211	1.63531	6.30942	0.594355	ZH16_S1	0.645958	--	Unknown protein
arahy.XWZQ7T	21.1352	6.95943	4.66335	4.17559	ZH16_S1	0.670718	--	Transducin/WD40 repeat-like superfamily protein
arahy.XIU4QN	0.857022	0	0	0	ZH16_S1	1	--	IAA-amino acid hydrolase ILR1-like 4-like [Glycine max]
arahy.E6VM83	37.6847	1.57019	1.09088	2.0343	ZH16_S1	0.946018	--	actin 1
arahy.LS23Q4	2.83462	0.0354304	0.158539	0.0389534	ZH16_S1	0.944071	--	polygalacturonase 4
arahy.PY7LAP	5.13798	0.516524	0.384772	0.0759571	ZH16_S1	0.899469	--	Haloacid dehalogenase-like hydrolase (HAD) superfamily protein
arahy.LAWA8U	0.118132	0	0	0	ZH16_S1	1	--	sugar porter (SP) family MFS transporter
arahy.II0HQF	14.7564	2.97255	4.20325	4.85875	ZH16_S1	0.670737	--	Unknown protein
arahy.M3AF87	0.757815	0	0.10944	0	ZH16_S1	0.855585	--	protein IDA-LIKE 2-like [Glycine max]
arahy.3RGS9M	12.9467	0.0613816	0.017472	0.0261334	ZH16_S1	0.995259	--	Cytochrome P450 superfamily protein
arahy.GETR6D	18.5497	0.568024	1.00182	0.581477	ZH16_S1	0.945992	--	Protein phosphatase 2C family protein
arahy.VVHX2K	0.720297	0.0934448	0.0437414	0	ZH16_S1	0.870269	--	mitochondrial phosphate carrier protein 3, mitochondrial-like [Glycine max]
arahy.G65HTE	150.41	47.0343	56.3603	19.7248	ZH16_S1	0.625289	--	delta(24)-sterol reductase-like protein
arahy.FKJ1CZ	8.7035	0.579366	0.331657	0.542054	ZH16_S1	0.933433	--	Protein kinase superfamily protein
arahy.ZP3GRT	0.856559	0.118762	0.182773	0.201275	ZH16_S1	0.765019	--	TRAF-like family protein
arahy.4NL1XF	1.55756	0.198793	0.0634333	0	ZH16_S1	0.872369	--	Calcium-binding EF-hand family protein
arahy.QK4PF2	29.317	0.349728	0.151906	0	ZH16_S1	0.988071	--	fatty acyl-CoA reductase 3-like [Glycine max]
arahy.BZ5ZMX	4.53535	1.2081	0.0925782	0.132307	ZH16_S1	0.733626	--	sulfate transporter 1
arahy.H93UBA	1.97366	0.101285	0	0	ZH16_S1	0.948682	--	late embryogenesis abundant protein
Novel00865	8.19594	2.89882	3.70537	2.93655	ZH16_S1	0.547902	--	--
arahy.2GZ91X	3.74947	0	0	0	ZH16_S1	1	--	Pleckstrin homology (PH) domain-containing protein / lipid-binding START domain-containing protein
arahy.7G2X2W	3.02473	0.998325	0.116614	0.0251689	ZH16_S1	0.669946	--	RAB GTPase activator protein n=11 Tax=Brassicaceae RepID=B3H765_ARATH
arahy.T4HC5L	31.1326	1.24506	0.551023	0.576279	ZH16_S1	0.960008	--	glucomannan 4-beta-mannosyltransferase 9-like [Glycine max]
arahy.V8VQR4	15.7321	0	0	0	ZH16_S1	1	--	SAUR-like auxin-responsive protein family
arahy.TS08QV	1.37505	0	0	0	ZH16_S1	1	--	unknown protein
arahy.DTC7Y5	1.37354	0.094434	0.0658086	0.0661808	ZH16_S1	0.931248	--	receptor-like protein kinase 2
arahy.68M7RQ	0.146418	0	0	0	ZH16_S1	1	--	plasma membrane intrinsic protein 1
arahy.2U0JEX	4.35722	0.0779038	1.09732	0.743892	ZH16_S1	0.74816	--	UDP-Glycosyltransferase superfamily protein
arahy.3U4A0B	44.8758	12.8987	3.64194	2.00973	ZH16_S1	0.712569	--	annexin 5
arahy.5FH16S	0.721839	0.189511	0.104646	0.0670191	ZH16_S1	0.737461	--	Transmembrane amino acid transporter family protein
arahy.14EYW3	3.17003	0.0527375	0.0268679	0	ZH16_S1	0.983364	--	putative pectinesterase/pectinesterase inhibitor 45-like [Glycine max]
arahy.338KFG	1.76927	0	0.0533198	0.0467962	ZH16_S1	0.969863	--	Cysteine/Histidine-rich C1 domain family protein
arahy.V14QW9	0.693609	0.0325465	0	0	ZH16_S1	0.953077	--	Exonuclease, DNA polymerase III, epsilon subunit n=1 Tax=Eubacterium sp. 14-2 RepID=S0IXM4_9FIRM
arahy.J3JZ4F	4.18955	0.0659203	0	0.0223687	ZH16_S1	0.984266	--	purple acid phosphatase 27
arahy.XE555B	5.51242	0	0	0	ZH16_S1	1	--	Protein kinase superfamily protein
arahy.S6UD8T	0.991276	0	0.0275111	0	ZH16_S1	0.972247	--	serine/threonine protein phosphatase 2A
arahy.79WGU4	12.5359	6.08924	4.11478	2.41386	ZH16_S1	0.514255	--	phosphoinositide phospholipase C 6-like [Glycine max]
arahy.Z8QNYX	0.144809	0.0640797	0	0	ZH16_S1	0.557488	--	Gag-pol polyprotein n=1 Tax=Eustoma exaltatum subsp. russellianum RepID=G1UC42_EUSER
arahy.2RD29A	9.82463	0	0	0	ZH16_S1	1	--	probable galacturonosyltransferase-like 4-like [Glycine max]
arahy.HGQ0MH	31.5546	6.51638	9.48974	6.7694	ZH16_S1	0.69926	--	probable xyloglucan glycosyltransferase 12-like [Glycine max]
arahy.MGTU20	7.1496	0	0	0	ZH16_S1	1	--	Calcium-dependent lipid-binding (CaLB domain) family protein
arahy.X1DC6B	0.357648	0	0.0987688	0.118528	ZH16_S1	0.668592	--	pectinesterase 11
arahy.QNNT5D	12.5557	3.29118	0.567737	0.393758	ZH16_S1	0.737874	--	Folic acid and derivative biosynthetic process isoform 1 n=1 Tax=Theobroma cacao RepID=UPI00042B7F04
arahy.5KS94B	3.63872	0.430927	0.665488	0.557112	ZH16_S1	0.81711	--	uncharacterized protein At5g41620-like [Glycine max]
arahy.RHK7Y5	0.833249	0	0	0	ZH16_S1	1	--	Peptidoglycan-binding LysM domain-containing protein
arahy.R7GC1L	0.858157	0	0	0	ZH16_S1	1	--	UDP-Glycosyltransferase superfamily protein
arahy.Q9WPYW	23.2087	0.35068	0	0.502113	ZH16_S1	0.978365	--	SAUR-like auxin-responsive protein family
arahy.D01JRP	22.1139	4.33887	2.08558	1.18908	ZH16_S1	0.803794	--	Protein of Unknown Function (DUF239)
Novel04621	6.22987	0.0377133	0.0798954	0	ZH16_S1	0.987175	--	--
arahy.T11BLV	2.43542	0.0657969	0.0552585	0.168796	ZH16_S1	0.930691	--	exocyst subunit exo70 family protein B1
arahy.S726NC	9.75413	3.04386	1.17733	0.797445	ZH16_S1	0.687941	--	FAD/NAD(P)-binding oxidoreductase family protein
arahy.RZ4SVU	43.8673	6.45491	2.60026	1.40167	ZH16_S1	0.852854	--	HAD superfamily, subfamily IIIB acid phosphatase
arahy.4KG7L9	8.70548	0.480795	0.297982	0.137197	ZH16_S1	0.944771	--	WD repeat-containing protein 5-like [Glycine max]
arahy.VJNQ2E	0.361383	0	0	0	ZH16_S1	1	--	3-ketoacyl-CoA synthase 2
arahy.3VR7C0	11.71	3.62108	1.66093	1.22017	ZH16_S1	0.690771	--	glucan endo-1,3-beta-glucosidase 8-like [Glycine max]
Novel02300	1.02627	0.022055	0.10652	0.0625457	ZH16_S1	0.896207	--	--
arahy.C3I2PC	0.519035	0.0668874	0.0856626	0	ZH16_S1	0.834958	--	beta-amylase 6
arahy.JGWU85	4.0474	0.454711	0.431086	0.111361	ZH16_S1	0.887654	--	calcium-transporting ATPase 2, plasma membrane-type protein
arahy.A8YTMR	8.68533	0.0821691	2.97984	0.0649546	ZH16_S1	0.656911	--	tryptophan synthase beta chain
arahy.8EI7FZ	0.12826	0	0	0	ZH16_S1	1	--	F-box family protein
arahy.8Q9000	811.991	110.571	47.8545	21.5252	ZH16_S1	0.863827	--	soluble inorganic pyrophosphatase
arahy.0Y1AJC	15.259	5.90358	4.55247	2.45237	ZH16_S1	0.613108	--	putative ribonuclease H protein At1g65750-like isoform X4 [Glycine max]
arahy.52W6Q5	3.72104	1.32757	1.75171	1.04097	ZH16_S1	0.529241	--	ankyrin repeat family protein
arahy.N584HR	0.41003	0	0	0	ZH16_S1	1	--	NADH-ubiquinone oxidoreductase chain 6 n=31 Tax=Magnoliophyta RepID=K7L9U2_SOYBN
arahy.2FUK2Z	9.47238	4.72908	2.61975	1.99541	ZH16_S1	0.500751	--	uncharacterized membrane protein At3g27390-like [Glycine max]
arahy.QYI4M0	11.3156	0.23325	1.88824	1.37154	ZH16_S1	0.833129	--	Unknown protein
arahy.8CC3D4	120.187	0.921376	2.78127	5.03933	ZH16_S1	0.958071	--	Plant invertase/pectin methylesterase inhibitor superfamily protein
Novel00852	62.9957	1.70174	2.72178	3.8496	ZH16_S1	0.938891	--	--
arahy.U5DX0D	0.104686	0	0	0.0398204	ZH16_S1	0.619622	--	probable histone-lysine N-methyltransferase ATXR3-like isoform X2 [Glycine max]
arahy.RQMB8Y	14.3602	4.45227	3.08694	1.7926	ZH16_S1	0.689959	--	filament-like plant protein 7-like isoform X1 [Glycine max]
arahy.B783NX	1.46988	0	0	0	ZH16_S1	1	--	general regulatory factor 12
arahy.3LJ0UE	23.9422	8.83133	10.0306	9.30321	ZH16_S1	0.581047	--	Serine/threonine protein phosphatase family protein
arahy.8DE1JP	27.5598	7.09093	6.20508	2.79795	ZH16_S1	0.742708	--	Phosphoglycerate mutase family protein
arahy.4E7QKU	83.4936	14.9106	12.3468	5.67909	ZH16_S1	0.821417	--	Acyl-ACP thioesterase
arahy.WSMZ37	16.1283	5.46314	0.941827	0.764915	ZH16_S1	0.66127	--	hypothetical protein
arahy.445YZY	3.87994	0.622853	0.401215	0.604341	ZH16_S1	0.839468	--	Unknown protein
arahy.NF5K9F	54.9674	8.43762	20.0627	13.7632	ZH16_S1	0.635007	--	GHMP kinase family protein
arahy.06ADV2	0.291093	0.103513	0.115912	0.1391	ZH16_S1	0.522145	--	unknown protein
arahy.GF35LS	510.327	62.4766	57.2271	45.1304	ZH16_S1	0.877575	--	thioredoxin 2
arahy.82L1EP	16.0455	3.69076	2.29163	1.36604	ZH16_S1	0.769982	--	Chalcone-flavanone isomerase family protein
arahy.J0213X	0.259137	0.0922884	0.054322	0.0583999	ZH16_S1	0.643863	--	photosystem I P700 chlorophyll A apoprotein
arahy.ABE34K	4.93398	0.942265	0.336981	0	ZH16_S1	0.809026	--	transmembrane protein, putative
arahy.Y74ICM	0.655549	0.11547	0.2893	0.126952	ZH16_S1	0.558691	--	senescence-associated protein, putative
arahy.T04E6T	16.8139	7.36105	4.58546	3.93294	ZH16_S1	0.562204	--	alpha-amylase-like 3
arahy.TVEN2V	0.119915	0.049995	0	0	ZH16_S1	0.583078	--	Unknown protein
arahy.UV5URX	0.823802	0	0	0	ZH16_S1	1	--	Sec14p-like phosphatidylinositol transfer family protein
arahy.NHE1TC	41.8459	10.5269	5.95559	5.3178	ZH16_S1	0.748437	--	Integral membrane Yip1 family protein
arahy.F8Q1RV	13.1612	2.41943	1.91162	0.955975	ZH16_S1	0.81617	--	BTB/POZ domain-containing protein [Glycine max]
arahy.1N3H6Z	10.3953	3.78045	2.21435	2.08409	ZH16_S1	0.636329	--	cytochrome C-type biogenesis protein CcmE
arahy.R5AJY0	5.85952	0.558276	1.70877	1.7717	ZH16_S1	0.697637	--	calcium and calcium/calmodulin-dependent serine/threonine-protein kinase [Glycine max]
arahy.11XWIC	26.1169	0.0590009	0	0.0541652	ZH16_S1	0.997741	--	Ras-related small GTP-binding family protein
arahy.TVY351	0.189152	0	0	0	ZH16_S1	1	--	unknown protein
arahy.XN9UYN	0.844272	0.24238	0.37885	0.255601	ZH16_S1	0.55127	--	uncharacterized protein LOC100812281 isoform X2 [Glycine max]
arahy.03H74W	0.898513	0.185671	0.0799117	0	ZH16_S1	0.793357	--	Protein kinase superfamily protein
arahy.8MB9CM	2.88261	0.942702	0.799034	0.143968	ZH16_S1	0.67297	--	Protein phosphatase 2C family protein
arahy.RN5M7S	2.2044	0.361015	1.08767	0.227216	ZH16_S1	0.506591	--	protein XRI1-like isoform X3 [Glycine max]
arahy.WAC0Q0	2.87258	0.503396	1.41383	1.20539	ZH16_S1	0.507817	--	Tar1p n=1 Tax=Medicago truncatula RepID=G7K0E0_MEDTR
arahy.ZFC78D	50.4774	0.82962	2.05128	0.0853249	ZH16_S1	0.959362	--	FAD-binding Berberine family protein
arahy.JMNW81	66.627	18.1235	11.8307	9.08756	ZH16_S1	0.727985	--	Cytochrome C1 family
arahy.7CP98C	2.80681	0.562967	0.817173	0.729012	ZH16_S1	0.708861	--	uncharacterized protein LOC100811424 isoform X9 [Glycine max]
arahy.72AI1G	16.3964	2.1609	6.15746	1.89487	ZH16_S1	0.624463	--	F-box family protein
arahy.7YIN0X	19.8183	5.71633	1.18237	0.522451	ZH16_S1	0.711562	--	Peroxidase superfamily protein
arahy.IH6TUL	238.419	72.4337	28.1909	18.0287	ZH16_S1	0.696192	--	Ubiquinol-cytochrome c reductase complex protein n=2 Tax=Papilionoideae RepID=G7L638_MEDTR
arahy.50NG3N	31.3299	12.2881	8.50674	6.46702	ZH16_S1	0.607785	--	SEC1 family transport protein SLY1-like [Glycine max]
arahy.J2QQC8	13.284	3.28832	2.14417	1.33894	ZH16_S1	0.75246	--	ATP binding/protein serine/threonine kinase [Glycine max]
arahy.PT3XB5	0.735452	0	0	0	ZH16_S1	1	--	WD repeat-containing protein 44-like [Glycine max]
arahy.PIY4C5	0.134465	0	0	0	ZH16_S1	1	--	unknown protein
arahy.9Z6I10	47.7555	14.641	3.71164	1.85147	ZH16_S1	0.693418	--	Bifunctional inhibitor/lipid-transfer protein/seed storage 2S albumin superfamily protein
arahy.3U8Q93	0.21997	0.038658	0	0	ZH16_S1	0.824258	--	protein YLS7-like [Glycine max]
arahy.ZG7I69	1.73603	0	0.0848658	0.0257272	ZH16_S1	0.951115	--	Protein kinase superfamily protein
arahy.RT9W1M	66.0103	25.3613	24.7812	14.341	ZH16_S1	0.615798	--	hypothetical protein
Novel02787	8.60616	0.83682	1.49018	1.58666	ZH16_S1	0.815637	--	--
arahy.15S87B	0.547574	0.0780915	0.137377	0.0372711	ZH16_S1	0.749117	--	Protein kinase superfamily protein
arahy.GLLM5N	11.0734	0.50655	0.135188	0.0847901	ZH16_S1	0.954255	--	18.5 kDa class I heat shock protein [Glycine max]
arahy.Y3EBK0	6.32091	1.22906	0.840857	1.2044	ZH16_S1	0.805556	--	hydroxyproline-rich glycoprotein family protein
arahy.EJ39VB	1.60855	0	0	0	ZH16_S1	1	--	short-chain dehydrogenase-reductase B
arahy.H66Y7T	0.293267	0.0309305	0.061991	0.0545061	ZH16_S1	0.788619	--	receptor-like protein kinase 2
arahy.P47HRA	4.58328	1.90388	0.970612	0.754437	ZH16_S1	0.584603	--	Protein kinase superfamily protein
arahy.RRC04T	3.73938	0.0594676	0.185071	0.0122155	ZH16_S1	0.950508	--	respiratory burst oxidase homolog B
arahy.QV24KU	28.2182	8.96028	1.13564	0.251855	ZH16_S1	0.682464	--	O-acyltransferase (WSD1-like) family protein
arahy.Q60T31	0.263894	0.0144373	0.102584	0.0349114	ZH16_S1	0.611267	--	Peptide chain release factor 1
arahy.P83Y1M	13.3654	2.9549	3.2711	2.5661	ZH16_S1	0.755257	--	Transducin/WD40 repeat-like superfamily protein
arahy.F25ZWM	0.285712	0	0	0	ZH16_S1	1	--	unknown protein
arahy.4BBW7G	0.518585	0.0197057	0.0309125	0.223664	ZH16_S1	0.568703	--	cysteine-rich receptor-kinase-like protein
arahy.X7S7J8	44.8469	0.244241	1.02466	0.302431	ZH16_S1	0.977152	--	Avr9/Cf-9 rapidly elicited protein
arahy.TI8HRK	64.0933	11.7856	11.3615	17.4881	ZH16_S1	0.727147	--	maternal effect embryo arrest 59
arahy.R1Y5X8	3.12148	0.321724	0.693164	0.326	ZH16_S1	0.777938	--	SAUR-like auxin-responsive protein family
arahy.NWTA0X	1497.68	21.5303	6.21427	0	ZH16_S1	0.985624	--	disease-resistance response protein
arahy.IT02W3	6.79384	2.09978	0.867028	0.693415	ZH16_S1	0.69093	--	nitrate transporter 1.7
arahy.IQLC9A	0.117737	0	0	0	ZH16_S1	1	--	probable 2-oxoglutarate/Fe(II)-dependent dioxygenase-like [Glycine max]
arahy.2PCK9I	1.04856	0.184054	0.0138448	0	ZH16_S1	0.82447	--	probable BOI-related E3 ubiquitin-protein ligase 3-like [Glycine max]
arahy.FTDL1P	9.34433	3.65156	3.76251	3.05561	ZH16_S1	0.597349	--	trehalose phosphate synthase
arahy.30MQ01	75.3984	0	0.0404291	0	ZH16_S1	0.999464	--	specific tissue protein
arahy.WH3GKX	0.828372	0.108488	0.210581	0	ZH16_S1	0.74579	--	Mitochondrial protein, putative n=1 Tax=Medicago truncatula RepID=G7I9T8_MEDTR
arahy.JUDK08	2.63022	0.873044	0.348938	0.198736	ZH16_S1	0.668071	--	microtubule-associated proteins 70-5
arahy.DIS46Y	99.8094	28.0821	24.1008	16.008	ZH16_S1	0.718642	--	tubulin beta-1 chain
arahy.E0ZWVI	0.108906	0	0	0	ZH16_S1	1	--	2-hydroxyacyl-CoA lyase-like [Glycine max]
arahy.SAFK3A	36.2347	3.82266	1.07082	0.213112	ZH16_S1	0.894503	--	UDP-D-glucose/UDP-D-galactose 4-epimerase 5
arahy.T8W31W	43.4111	3.36943	17.0749	20.6969	ZH16_S1	0.523234	--	Remorin family protein
arahy.7YN7DY	3.68926	0.125344	0	0	ZH16_S1	0.966025	--	CBS domain-containing protein CBSCBSPB1-like isoform X4 [Glycine max]
arahy.YW30D2	150.153	20.2331	13.9219	4.0513	ZH16_S1	0.86525	--	3-ketoacyl-CoA synthase 10
arahy.ARK2IX	0.447252	0	0	0.122138	ZH16_S1	0.726913	--	DUF309 domain protein
arahy.DB50AT	36.0385	11.8677	5.94314	2.6216	ZH16_S1	0.670695	--	C2H2-like zinc finger protein
arahy.RIH8EG	9.64392	4.44308	2.72193	1.56719	ZH16_S1	0.539287	--	trehalose phosphate synthase
arahy.TPH81X	44.8622	4.34345	5.7113	6.05736	ZH16_S1	0.864978	--	Core-2/I-branching beta-1,6-N-acetylglucosaminyltransferase family protein
arahy.23D8N6	39.884	10.6735	7.6298	9.21874	ZH16_S1	0.732386	--	transmembrane protein 184A-like [Glycine max]
arahy.9CLT74	0.818997	0.18623	0.0523959	0	ZH16_S1	0.772612	--	nodulin MtN21 /EamA-like transporter family protein
arahy.H47VCY	13.6218	3.65267	2.78715	4.34905	ZH16_S1	0.680728	--	cyclic nucleotide-gated ion channel-like protein
arahy.YH23E2	16.8227	8.35945	4.41804	2.82916	ZH16_S1	0.503084	--	electron transfer flavoprotein beta
Novel01108	10.378	4.82711	1.91365	2.40822	ZH16_S1	0.53487	--	--
arahy.CA7N65	4.37512	0.0313508	0	0.0344682	ZH16_S1	0.992122	--	Cysteine proteinases superfamily protein
arahy.FJSG30	0.553114	0	0	0	ZH16_S1	1	--	uncharacterized protein At1g66480-like [Glycine max]
arahy.2UA27Y	0.299752	0.0773176	0	0	ZH16_S1	0.742062	--	WUSCHEL related homeobox 1
arahy.PEHM2U	0.144282	0	0.0469028	0	ZH16_S1	0.674922	--	uncharacterized protein LOC100820285 isoform X2 [Glycine max]
arahy.K1D1LI	1.44662	0.246161	0	0	ZH16_S1	0.829837	--	Hemerythrin class glutathione S-transferase n=1 Tax=Physcomitrella patens subsp. patens RepID=A9RED4_PHYPA
arahy.I21QA9	7.39693	2.64037	3.06339	2.52618	ZH16_S1	0.585857	--	xanthine dehydrogenase 1
arahy.RC4H1Q	41.8456	14.5704	5.29485	1.80187	ZH16_S1	0.651806	--	unknown protein
arahy.QT5RS9	2.33926	0.923248	0.414594	0.0706531	ZH16_S1	0.605325	--	GDSL-like Lipase/Acylhydrolase superfamily protein
Novel02047	21.6456	9.51718	6.10073	6.95629	ZH16_S1	0.560317	--	--
arahy.56Z1DA	5.62271	0.465697	0.237516	0.762924	ZH16_S1	0.864314	--	Cyclopropane-fatty-acyl-phospholipid synthase
Novel00115	0.963491	0.0329139	0.0281064	0.0906489	ZH16_S1	0.905916	--	--
arahy.P80FSF	0.17339	0	0	0	ZH16_S1	1	--	monodehydroascorbate reductase 1
arahy.PE002R	7.33873	3.10741	2.12086	1.17365	ZH16_S1	0.576573	--	protein YLS7-like [Glycine max]
arahy.EJ828S	5.64031	0.958957	0.66285	1.11903	ZH16_S1	0.801602	--	clathrin interactor EPSIN 2-like [Glycine max]
arahy.X8Y7H8	24.2526	11.6977	11.6541	8.20333	ZH16_S1	0.517672	--	cell number regulator 8-like [Glycine max]
arahy.2B715G	0.29095	0	0	0	ZH16_S1	1	--	unknown protein
arahy.H4CNNK	13.8393	5.21631	2.02899	1.09604	ZH16_S1	0.623079	--	caffeoylshikimate esterase-like isoform X1 [Glycine max]
arahy.0RIH3A	16.2107	3.31859	0.560886	0.533416	ZH16_S1	0.795283	--	sulfate transporter 1
arahy.0CQJ15	3.34102	0	0.0998868	0.132467	ZH16_S1	0.960351	--	2-oxoglutarate (2OG) and Fe(II)-dependent oxygenase superfamily protein
arahy.TTT29M	0.110549	0	0	0	ZH16_S1	1	--	calcium-dependent lipid-binding family protein
arahy.CGG9UY	0.172589	0	0	0	ZH16_S1	1	--	Unknown protein
arahy.RY0HX3	19.6859	4.40673	3.19669	2.17465	ZH16_S1	0.776148	--	Galactosyltransferase family protein
arahy.BG7UA0	26.2774	3.5786	2.97407	1.70319	ZH16_S1	0.863815	--	arabinose 5-phosphate isomerase, putative
arahy.IA0PF7	2.80769	0.993816	0.842293	0.592504	ZH16_S1	0.646038	--	ubiquitin carboxyl-terminal hydrolase 19-like isoform X2 [Glycine max]
arahy.FCYU2S	7.99457	0.156497	1.01007	0.990829	ZH16_S1	0.873655	--	transmembrane protein, putative
arahy.1EJ222	201.535	3.01852	2.09009	1.30511	ZH16_S1	0.985022	--	uncharacterized protein LOC102663882 [Glycine max]
arahy.GWI8GZ	30.1909	14.3099	11.2567	10.8297	ZH16_S1	0.52602	--	G patch domain and KOW motifs-containing protein n=3 Tax=Serpentes RepID=V8P6T4_OPHHA
arahy.0452KN	7.62777	0	1.16298	0.367364	ZH16_S1	0.847533	--	hypothetical protein
arahy.3K2ECI	0.900868	0.0714031	0.197556	0	ZH16_S1	0.780704	--	Unknown protein
arahy.K5MJK0	126.439	6.3644	3.90619	1.98906	ZH16_S1	0.949664	--	2,3-diketo-5-methylthio-1-phosphopentane phosphatase
arahy.HZGV61	1.70775	0.083141	0.796504	0.332284	ZH16_S1	0.533596	--	receptor-like protein kinase 4
arahy.2A5IMX	1.29919	0	0	0	ZH16_S1	1	--	ser/thr-rich protein T10 in DGCR region-like protein
arahy.3AGG5H	0.98098	0	0	0	ZH16_S1	1	--	Unknown protein
arahy.78NDKC	1.23306	0	0	0	ZH16_S1	1	--	ATP-binding/protein serine/threonine kinase [Glycine max]
arahy.G1I4C8	150.615	29.4288	32.9738	18.8132	ZH16_S1	0.781072	--	legumin type B-like [Glycine max]
arahy.ZP9SCJ	70.802	12.8905	8.61366	4.78011	ZH16_S1	0.817936	--	HXXXD-type acyl-transferase family protein
arahy.XBHS2W	6.81336	1.28627	1.57194	1.32757	ZH16_S1	0.769285	--	Unknown protein
arahy.TQ6P94	3.09988	0	0.0409837	0	ZH16_S1	0.986779	--	uncharacterized protein LOC100810533 isoform X3 [Glycine max]
arahy.PFN41B	102.293	11.3035	7.86748	3.19493	ZH16_S1	0.889498	--	probable rhamnose biosynthetic enzyme 1-like isoform X2 [Glycine max]
arahy.K32PSG	59.6988	16.5959	7.37138	3.94948	ZH16_S1	0.722006	--	probable glucan endo-1,3-beta-glucosidase A6-like [Glycine max]
arahy.K0MBH8	0.162507	0	0	0	ZH16_S1	1	--	S-adenosyl-L-methionine-dependent methyltransferases superfamily protein
arahy.FQAE3D	30.4859	12.796	8.62377	6.12808	ZH16_S1	0.580266	--	NC domain-containing protein-related
arahy.47H2HK	10.4102	0	0	0	ZH16_S1	1	--	Unknown protein
arahy.M97CFY	0.111912	0	0	0	ZH16_S1	1	--	sulfate transporter 1
arahy.G1PS4Z	32.3474	9.26708	11.7524	10.4033	ZH16_S1	0.636682	--	unknown protein
arahy.3F3WIY	0.159894	0.0591171	0	0	ZH16_S1	0.630273	--	FKBP-like peptidyl-prolyl cis-trans isomerase family protein
arahy.D5U0A9	4.77854	1.73251	0.235314	0.0318356	ZH16_S1	0.637439	--	receptor kinase 2
arahy.ZENB5B	3.5637	0.598487	1.42267	0.409146	ZH16_S1	0.60079	--	actin 7
arahy.2VF8XD	77.9313	24.8335	9.73528	4.13284	ZH16_S1	0.681341	--	arginase
arahy.L075VR	4.23927	0.343015	1.71878	0.60698	ZH16_S1	0.594558	--	Tar1p n=1 Tax=Medicago truncatula RepID=G7K0E0_MEDTR
arahy.Q07BGG	34.9083	1.75975	8.37239	2.13235	ZH16_S1	0.760161	--	Late embryogenesis abundant (LEA) hydroxyproline-rich glycoprotein family
arahy.ZG0GPL	0.348193	0.076727	0	0.0653334	ZH16_S1	0.779643	--	probable 2-oxoglutarate/Fe(II)-dependent dioxygenase-like [Glycine max]
arahy.FN5ZTC	1.11784	0.536767	0.393954	0.175725	ZH16_S1	0.519816	--	WD-40 repeat family protein / beige-related
arahy.3IGY6I	0.936811	0.0490732	0.0156589	0	ZH16_S1	0.947617	--	Tryptophan/tyrosine permease
arahy.0ZF8VJ	72.4778	13.5302	14.679	22.4849	ZH16_S1	0.689768	--	beta-galactosidase 3
arahy.I8XWBG	1.22972	0	0.0171117	0	ZH16_S1	0.986085	--	polygalacturonase 4
arahy.A3V54Z	0.579548	0.11682	0	0	ZH16_S1	0.798429	--	strictosidine synthase-like 3
arahy.35C0M2	85.4912	29.5471	21.5828	9.53617	ZH16_S1	0.654384	--	NADH dehydrogenase [ubiquinone] 1 alpha subcomplex subunit 2 n=3 Tax=Camelineae RepID=NDUA2_ARATH
arahy.WQLB21	6.50365	2.19863	1.13386	0.700247	ZH16_S1	0.66194	--	probable galacturonosyltransferase 11-like [Glycine max]
arahy.VJ6NUA	422.019	0.93319	0.122197	0.0921658	ZH16_S1	0.997789	--	Gibberellin-regulated family protein
arahy.D7034C	1.92629	0.265349	0	0.0281806	ZH16_S1	0.862249	--	uncharacterized protein At3g49720-like isoform X3 [Glycine max]
arahy.FE4WD3	35.2639	9.63135	4.03044	2.65604	ZH16_S1	0.726878	--	Core-2/I-branching beta-1,6-N-acetylglucosaminyltransferase family protein
arahy.I6FI3G	36.3312	3.06446	1.37762	1.6538	ZH16_S1	0.915652	--	Remorin family protein
arahy.D9VVXL	15.823	5.12265	2.52157	1.71113	ZH16_S1	0.676252	--	Sec14p-like phosphatidylinositol transfer family protein
arahy.FGMN08	0.293631	0.0387888	0	0	ZH16_S1	0.8679	--	Unknown protein
arahy.8Q6EW7	45.5217	5.40209	7.56498	7.43276	ZH16_S1	0.833816	--	cellulose synthase 6
arahy.6D2G91	29.7131	3.73727	1.51274	0.70704	ZH16_S1	0.874221	--	Cyclopropane-fatty-acyl-phospholipid synthase
arahy.99W7VW	13.5912	2.22604	0.545999	0.560655	ZH16_S1	0.836215	--	BTB/POZ domain-containing protein [Glycine max]
arahy.RUCU71	18.388	7.01294	5.18908	1.99069	ZH16_S1	0.618614	--	Protein kinase superfamily protein
Novel05117	3.7208	0.44249	1.41408	1.11867	ZH16_S1	0.619952	--	--
arahy.742GZ0	0.298827	0	0	0	ZH16_S1	1	--	Unknown protein
arahy.4E8AG2	79.6353	30.958	19.7256	12.8302	ZH16_S1	0.611253	--	mitochondrial processing peptidase alpha subunit
Novel05104	2.00329	0.331859	0.492412	0.338507	ZH16_S1	0.754198	--	--
arahy.03P8S0	4.60508	0	0.153337	0.0484866	ZH16_S1	0.966703	--	uncharacterized protein LOC100820443 [Glycine max]
arahy.62I324	1.41725	0.239804	0	0.0406864	ZH16_S1	0.830796	--	probable 2-oxoglutarate/Fe(II)-dependent dioxygenase-like [Glycine max]
arahy.Y56548	1.44947	0.0480296	0.0122347	0.0394594	ZH16_S1	0.966864	--	LRR and NB-ARC domain disease resistance protein
Novel04698	11.7197	5.43743	2.97239	2.53168	ZH16_S1	0.536043	--	--
arahy.6ULA6T	14.1543	6.13697	2.5349	1.52487	ZH16_S1	0.566425	--	Syntaxin/t-SNARE family protein
Novel02108	0.463386	0.227999	0.145823	0.115105	ZH16_S1	0.507971	--	--
arahy.A6C0JM	0.894754	0	0	0.0490644	ZH16_S1	0.945164	--	protein kinase family protein
arahy.MMYB4K	4.65095	0	0	0	ZH16_S1	1	--	Alpha/beta hydrolase related protein
arahy.5AV06D	2.21644	0	0	0	ZH16_S1	1	--	ABC transporter F family member 3-like [Glycine max]
arahy.UN6F3P	0.418161	0.139671	0.0298175	0.0383897	ZH16_S1	0.665988	--	Transcription initiation factor TFIID subunit A
arahy.L6NNIX	11.1784	2.55162	2.02937	1.53353	ZH16_S1	0.771736	--	adiponectin receptor protein 2-like isoform X3 [Glycine max]
arahy.J4S87V	95.8256	3.27751	2.24384	0.930484	ZH16_S1	0.965797	--	Water-selective transport intrinsic membrane protein 1 n=1 Tax=Lotus japonicus RepID=Q9LKJ6_LOTJA
arahy.GJE9M9	0.342238	0	0	0	ZH16_S1	1	--	Cytochrome P450 likeTBP n=1 Tax=Medicago truncatula RepID=G7K0E9_MEDTR
arahy.5HQW77	11.2917	4.47251	1.64061	0.979621	ZH16_S1	0.60391	--	Glucose-fructose oxidoreductase domain-containing protein 2, putative n=1 Tax=Theobroma cacao RepID=UPI00042B3EC8
arahy.2E8V1Z	0.122186	0	0	0	ZH16_S1	1	--	pleiotropic drug resistance 4
arahy.98TRC1	26.4362	7.3991	9.18576	8.73858	ZH16_S1	0.652531	--	ATP-binding/protein serine/threonine kinase [Glycine max]
arahy.AQ4HSR	5.27048	2.32209	1.76883	0.998656	ZH16_S1	0.559415	--	hydroxymethylglutaryl-CoA lyase
arahy.VA3ETP	0.162687	0	0	0	ZH16_S1	1	--	SAUR-like auxin-responsive protein family
arahy.4DFD6I	2.72421	0.247518	0	0.0290094	ZH16_S1	0.909141	--	LRR and NB-ARC domain disease resistance protein
arahy.PP4PHV	2.96785	0	0	0	ZH16_S1	1	--	profilin 4
arahy.D17QJV	17.7864	5.08389	1.99452	2.48526	ZH16_S1	0.71417	--	Core-2/I-branching beta-1,6-N-acetylglucosaminyltransferase family protein
arahy.X646PN	0.362245	0.0475374	0.0270626	0	ZH16_S1	0.86877	--	Plant protein of unknown function (DUF946)
arahy.UIR2ZL	24.4458	0.200156	0.232441	0.0442774	ZH16_S1	0.990492	--	Protein kinase superfamily protein
arahy.BLXL3H	9.52238	3.89481	3.23167	2.23715	ZH16_S1	0.590983	--	ATP binding / kinase/ protein kinase/ protein serine/threonine kinase/ protein-tyrosine kinase n=4 Tax=rosids RepID=C5DB54_VITVI
arahy.TS49ZR	0.303325	0	0	0	ZH16_S1	1	--	RING-H2 finger protein 2B
arahy.8I1ERN	0.134304	0	0	0	ZH16_S1	1	--	acyl-CoA-binding domain protein
arahy.NIG821	0.266313	0	0	0.0804856	ZH16_S1	0.697779	--	P-loop containing nucleoside triphosphate hydrolases superfamily protein
arahy.XAK5GM	2.94413	0	0.573436	0.872174	ZH16_S1	0.703758	--	Unknown protein
Novel00472	37.9295	2.33307	1.75747	3.865	ZH16_S1	0.8981	--	--
Novel01533	1.37326	0.338745	0.560858	0	ZH16_S1	0.591588	--	--
arahy.9R3N8Z	23.1636	6.1548	3.06397	2.50598	ZH16_S1	0.734289	--	Golgi vesicle transport-related protein n=1 Tax=Dacryopinax sp. (strain DJM 731) RepID=M5G5R1_DACSP
arahy.HN8ZWX	0.135423	0	0	0	ZH16_S1	1	--	Metallocarboxypeptidase inhibitor n=1 Tax=Medicago truncatula RepID=G7K1Z2_MEDTR
arahy.KRF4CZ	169.077	64.3713	55.6136	36.666	ZH16_S1	0.619278	--	Ras-related small GTP-binding family protein
arahy.E48QH9	2.93083	0.0479511	0.050792	0.0365397	ZH16_S1	0.98267	--	U-box domain-containing protein 4-like [Glycine max]
arahy.P0VEPY	5.26471	0.861647	0.386474	0.295757	ZH16_S1	0.836335	--	LRR and NB-ARC domain disease resistance protein
Novel02401	8.84783	0	0	0.0862477	ZH16_S1	0.990252	--	--
arahy.14KYNF	0.900906	0.0961826	0.135323	0.0751573	ZH16_S1	0.849792	--	HVA22-like protein F
arahy.T2F26W	29.753	7.25168	3.49507	2.88051	ZH16_S1	0.75627	--	probable galacturonosyltransferase 4-like [Glycine max]
arahy.B66YEF	0.136613	0	0	0	ZH16_S1	1	--	Peroxidase superfamily protein
arahy.B5Q2R1	9.95977	1.00532	0.122006	0.189686	ZH16_S1	0.899062	--	serine/threonine protein phosphatase 2A
arahy.3RU1TJ	4.17822	1.53815	0.770495	0.334248	ZH16_S1	0.631864	--	BTB/POZ domain-containing protein [Glycine max]
arahy.L8EKIA	53.7009	25.1194	21.1942	16.1341	ZH16_S1	0.532236	--	Acyl-ACP thioesterase
arahy.1EVC3W	0.668675	0	0.176407	0.0444657	ZH16_S1	0.736184	--	unknown protein
arahy.7JIW3E	54.1771	8.9807	5.23099	5.3588	ZH16_S1	0.834234	--	transmembrane protein, putative
arahy.HP46HH	53.3298	4.60801	3.26133	1.07525	ZH16_S1	0.913594	--	subtilisin-like serine protease 2
arahy.KQ5WJ5	20.2165	0.271269	1.12112	0.425929	ZH16_S1	0.944544	--	U-box domain-containing protein 26-like [Glycine max]
arahy.SUG60F	0.324192	0.0871963	0.136861	0.0681442	ZH16_S1	0.577839	--	OTU domain-containing protein 3-like isoform X3 [Glycine max]
arahy.JQE7IR	3.82836	1.42289	0.201872	0.173272	ZH16_S1	0.628328	--	Protein of unknown function, DUF538
arahy.Z3L25C	205.217	1.30417	0.745573	1.74923	ZH16_S1	0.991476	--	RING-H2 finger protein 2B
arahy.E8CC8A	11.604	3.76588	1.70897	1.249	ZH16_S1	0.675469	--	phosphoenolpyruvate carboxylase 1
arahy.T861P2	1.25233	0	0	0	ZH16_S1	1	--	putative phospholipid-transporting ATPase 9-like isoform X1 [Glycine max]
arahy.A9ZVJV	0.248681	0	0	0	ZH16_S1	1	--	3-ketoacyl-CoA synthase 2
arahy.JNL70L	12.7422	0.16325	0.18452	0.107961	ZH16_S1	0.985519	--	peptide transporter 1
Novel00888	1.03286	0	0	0	ZH16_S1	1	--	--
arahy.66PPWS	1.31626	0.0256319	0.021888	0	ZH16_S1	0.980527	--	nematode resistance protein-like HSPRO2-like [Glycine max]
arahy.PT1YSW	4.41975	1.27392	0.393759	0.353476	ZH16_S1	0.711766	--	L-ascorbate oxidase homolog [Glycine max]
arahy.ZG4E8S	4.79447	0.895635	0.443178	0.334326	ZH16_S1	0.813194	--	hypothetical protein
arahy.YPZ0ZF	107.382	4.01735	13.5412	13.2	ZH16_S1	0.873898	--	UDP-Glycosyltransferase superfamily protein
arahy.V9XADN	0.604708	0.073104	0.0658677	0.0402762	ZH16_S1	0.879109	--	Protein kinase superfamily protein
arahy.XA27J7	6.97342	0	0.0697213	0	ZH16_S1	0.990002	--	UDP-Glycosyltransferase superfamily protein
arahy.IYC01E	7.93102	1.2145	0.152626	0.25087	ZH16_S1	0.846868	--	18.1 kDa class I heat shock protein-like [Glycine max]
arahy.4IV72F	0.571285	0.00889814	0	0	ZH16_S1	0.984424	--	disease resistance protein (TIR-NBS-LRR class)
arahy.P6Q6NG	82.2474	34.0268	23.3099	8.69123	ZH16_S1	0.586288	--	Expressed protein n=1 Tax=Oryza sativa subsp. japonica RepID=Q10M11_ORYSJ
arahy.9BM01P	0.126708	0	0	0	ZH16_S1	1	--	Unknown protein
arahy.6D5JL1	18.0422	8.30123	6.63971	4.13606	ZH16_S1	0.5399	--	NIPA-like protein 2-like isoform X1 [Glycine max]
arahy.TPGZ8P	26.2633	7.59879	4.88218	4.40559	ZH16_S1	0.710668	--	Vps51/Vps67 family (components of vesicular transport) protein
arahy.7W0SSB	124.14	28.8397	57.7963	25.4645	ZH16_S1	0.534428	--	zinc finger A20 and AN1 domain stress-associated protein
arahy.SG1KTY	0.738371	0.337583	0.115036	0	ZH16_S1	0.5428	--	phy rapidly regulated 1
arahy.9LA4BC	2.30119	0.0239071	0.526457	0.30825	ZH16_S1	0.771224	--	peptide transporter 1
arahy.58WBAP	0.888888	0.409846	0	0	ZH16_S1	0.538923	--	protein YLS7-like [Glycine max]
Novel00930	88.0171	31.1257	13.9637	5.79328	ZH16_S1	0.646367	--	--
arahy.V14B4E	3.30608	0.95454	1.00485	0.493347	ZH16_S1	0.69606	--	uncharacterized protein LOC102669532 isoform X3 [Glycine max]
arahy.26KT5A	0.343764	0	0	0	ZH16_S1	1	--	alpha 1,4-glycosyltransferase family protein, putative
arahy.48Z960	0.427021	0.0452501	0.183205	0.0797403	ZH16_S1	0.570969	--	protein YLS7-like [Glycine max]
arahy.M0CFGP	13.5018	6.44665	4.97443	5.46037	ZH16_S1	0.522535	--	Unknown protein
arahy.T6DYUJ	0.696028	0.0838993	0.0267716	0	ZH16_S1	0.87946	--	protein pelota-like [Glycine max]
arahy.3K95UD	1.60415	0.428237	0.708019	0.190965	ZH16_S1	0.558633	--	metacaspase 1
arahy.PUL54B	0.56643	0.0754854	0	0	ZH16_S1	0.866735	--	Unknown protein
arahy.KN0ESM	0.50489	0	0	0	ZH16_S1	1	--	Erythronate-4-phosphate dehydrogenase family protein
arahy.CEXW72	2.6941	0.118344	0.393438	0.139866	ZH16_S1	0.853963	--	BTB/POZ domain-containing protein [Glycine max]
arahy.SNC74A	1.33926	0.0302758	0.0154244	0.0461415	ZH16_S1	0.965547	--	syntaxin of plants 131
arahy.AELR7S	30.6152	0.314024	0.0160802	0.128186	ZH16_S1	0.989743	--	alpha-1,4-glucan-protein synthase [UDP-forming]-like protein
arahy.STND79	0.786207	0.0419514	0.0909772	0.138369	ZH16_S1	0.824005	--	tubulin alpha-4 chain
arahy.BNKV9R	20.7889	7.84136	3.37967	3.33567	ZH16_S1	0.62281	--	protein YIF1B-like isoform X3 [Glycine max]
arahy.4PU0PP	52.9607	3.20474	1.3432	0.597088	ZH16_S1	0.939488	--	Protein-tyrosine phosphatase-like, PTPLA
arahy.VNJF7M	0.192911	0	0	0	ZH16_S1	1	--	uncharacterized protein LOC100815851 [Glycine max]
arahy.J5QP8A	17.1829	5.97743	5.13981	2.51114	ZH16_S1	0.652129	--	Ankyrin repeat family protein
arahy.T4QRY3	18.6719	0.352511	0.320567	0.055538	ZH16_S1	0.981121	--	adiponectin receptor protein 2-like isoform X3 [Glycine max]
arahy.864J84	19.3526	7.12979	3.80446	3.17449	ZH16_S1	0.631584	--	Got1/Sft2-like vescicle transport protein family
arahy.A4DTXZ	0.354192	0	0.0548204	0.0705807	ZH16_S1	0.800727	--	Unknown protein
arahy.QT2H54	6.1238	0.478454	1.01015	0.274936	ZH16_S1	0.835045	--	UDP-Glycosyltransferase superfamily protein
arahy.66C0B7	27.6723	12.8661	6.08954	5.12374	ZH16_S1	0.535056	--	unknown protein
arahy.6Y8D8Z	0.18706	0.0493281	0.00967836	0.0144762	ZH16_S1	0.736298	--	Kinase interacting (KIP1-like) family protein
arahy.4JLS0K	44.4157	4.10926	4.15348	4.03796	ZH16_S1	0.906486	--	probable galacturonosyltransferase 15-like [Glycine max]
arahy.F1JPW2	0.337603	0	0.0891854	0	ZH16_S1	0.735828	--	sulfotransferase 2A
arahy.VIZ2WZ	0.114783	0	0	0	ZH16_S1	1	--	hypothetical protein
arahy.351IJG	26.8504	7.38675	3.19243	2.59794	ZH16_S1	0.724892	--	Calcium-binding endonuclease/exonuclease/phosphatase family
arahy.T42YYR	7.65276	0.354665	0.862956	0.693205	ZH16_S1	0.887236	--	DUF4408 domain protein
Novel04614	8.49357	3.58772	1.4698	1.9405	ZH16_S1	0.577596	--	--
arahy.N80N6E	2.41802	0.169551	0.547733	0.891653	ZH16_S1	0.631247	--	vesicle associated protein
arahy.F0M84G	21.7362	0.169124	0.179897	0.392258	ZH16_S1	0.981954	--	cation/H+ exchanger 20
arahy.8W4KUS	0.835658	0.0468778	0	0	ZH16_S1	0.943903	--	ankyrin repeat-containing protein At3g12360-like [Glycine max]
Novel00641	4.99445	0.46078	0.193575	0.189307	ZH16_S1	0.907742	--	--
arahy.SQK8DJ	0.455779	0.0166925	0.0142543	0.0367046	ZH16_S1	0.919468	--	UDP-glucuronate:xylan alpha-glucuronosyltransferase 2-like [Glycine max]
arahy.VZLL2T	0.358349	0.0525485	0	0	ZH16_S1	0.85336	--	Calcium-binding EF-hand family protein n=1 Tax=Theobroma cacao RepID=UPI00042B2CE2
arahy.G53T1T	4.00324	1.60182	1.17764	1.12971	ZH16_S1	0.59987	--	alternative NAD(P)H dehydrogenase 2
arahy.NM4EZ4	0.100697	0	0	0.02045	ZH16_S1	0.796916	--	ATP synthase F1, alpha subunit
arahy.CXSI0G	0.133723	0	0	0	ZH16_S1	1	--	Protein kinase superfamily protein
arahy.I8TN6N	435.623	16.6104	111.191	144.784	ZH16_S1	0.667638	--	ATPase subunit 8 (mitochondrion) [Glycine max]
arahy.KJH8AJ	0.166505	0	0	0	ZH16_S1	1	--	transmembrane amino acid transporter family protein
arahy.1LA5Q7	11.1182	3.80442	2.41566	2.20201	ZH16_S1	0.65782	--	mitochondrial substrate carrier family protein B-like [Glycine max]
arahy.S1R27D	0.385845	0.0586481	0.00935706	0	ZH16_S1	0.848001	--	Cellulose synthase family protein
arahy.243YXU	4.36796	0	0	0	ZH16_S1	1	--	probable pectate lyase 3-like [Glycine max]
arahy.NGU2DL	12.615	4.73059	5.25055	3.6719	ZH16_S1	0.583786	--	galactose-1-phosphate uridylyltransferase
arahy.X94JKI	0.266032	0.0460786	0.0294066	0.0474212	ZH16_S1	0.821747	--	L-ascorbate oxidase [Glycine max]
arahy.GM7FG5	55.9037	25.667	7.06461	6.30208	ZH16_S1	0.540871	--	glutathione reductase
arahy.T6BXM8	0.104502	0.0129968	0	0	ZH16_S1	0.875631	--	Protein kinase superfamily protein
arahy.V50H5Q	5.97623	1.84427	0.979573	1.07562	ZH16_S1	0.691398	--	coatomer subunit zeta-3-like [Glycine max]
arahy.6ZZ12G	0.212749	0	0	0	ZH16_S1	1	--	hypothetical protein
arahy.9T6TW9	13.1117	6.40992	3.13714	2.68568	ZH16_S1	0.51113	--	Misfolded glycoproteins degradation protein Yos9, putative n=1 Tax=Talaromyces stipitatus (strain ATCC 10500 / CBS 375.48 / QM 6759 / NRRL 1006) RepID=B8ME08_TALSN
arahy.IX3DUW	3.5092	0.514949	0.271621	0.181468	ZH16_S1	0.853257	--	Galactosyltransferase family protein
arahy.Z23D3B	16.3151	7.62083	3.31451	3.50322	ZH16_S1	0.532898	--	phosphopantothenate-cysteine ligase-like protein
arahy.63G7RJ	26.3418	4.13011	2.55737	1.37446	ZH16_S1	0.843211	--	arabinose 5-phosphate isomerase, putative
arahy.K0BPHG	27.4335	1.10901	2.59794	0.242352	ZH16_S1	0.905301	--	Mitochondrial substrate carrier family protein
arahy.T9BXJY	11.863	2.99747	0.88032	0.507663	ZH16_S1	0.747327	--	Nucleotide-sugar transporter family protein
arahy.8D5WLD	1.47725	0.200741	0.0121947	0.0210905	ZH16_S1	0.864112	--	uncharacterized protein LOC100792919 isoform X4 [Glycine max]
arahy.U0AKQE	22.6236	7.40585	4.3087	3.80085	ZH16_S1	0.672649	--	Vps51/Vps67 family (components of vesicular transport) protein
arahy.FVV1VG	0.648598	0	0	0	ZH16_S1	1	--	meiotically up-regulated protein 71-like protein
arahy.QUEV48	3.31091	0.15037	0.566969	0	ZH16_S1	0.828757	--	Orf124 protein n=3 Tax=Beta RepID=Q9MF37_BETVU
arahy.BU3786	4.18268	1.02596	0.724554	0.547713	ZH16_S1	0.754711	--	Cytochrome P450 superfamily protein
arahy.2F0WHB	39.6035	13.7796	6.48818	4.71816	ZH16_S1	0.652062	--	potassium transporter 2
arahy.8B51UP	50.1033	4.58313	5.75667	2.50595	ZH16_S1	0.885104	--	SAUR-like auxin-responsive protein family
arahy.F96IVA	2.31699	0.730137	0.419528	0.500881	ZH16_S1	0.684877	--	ATP binding/protein serine/threonine kinase [Glycine max]
arahy.A0AXDD	21.6122	7.74875	4.35598	4.47125	ZH16_S1	0.641464	--	Protein kinase superfamily protein
arahy.MV0Z6Q	0.581711	0.268125	0.0131733	0.0169605	ZH16_S1	0.539074	--	laccase 2
Novel01314	5.67075	0	0.052416	0	ZH16_S1	0.990757	--	--
arahy.J18N96	0.821944	0.0674133	0.0287833	0.129156	ZH16_S1	0.842865	--	Secretory carrier membrane protein (SCAMP) family protein
Novel03935	7.93265	0	0	0	ZH16_S1	1	--	--
arahy.BVMI19	5.48105	0.391249	0.47114	0.291719	ZH16_S1	0.914042	--	structural molecule protein
arahy.D8W1EX	0.814482	0	0.0712401	0.0662722	ZH16_S1	0.912533	--	pfkB-like carbohydrate kinase family protein
arahy.74ZQ7H	2.96259	0.22144	0.96741	0.648432	ZH16_S1	0.673458	--	senescence-associated protein
arahy.RUJ0QA	153.971	10.6969	3.40608	4.13825	ZH16_S1	0.930526	--	Gibberellin-regulated family protein
arahy.CYMD29	1048.89	2.87835	3.18118	3.35703	ZH16_S1	0.996799	--	receptor-like protein kinase 2
arahy.Y21F8V	0.525447	0	0	0	ZH16_S1	1	--	CBS domain-containing protein CBSCBSPB1-like isoform X4 [Glycine max]
arahy.WLS58Y	29.8288	0.160008	2.11644	0.189106	ZH16_S1	0.929047	--	GDSL-like Lipase/Acylhydrolase superfamily protein
arahy.EZF2RR	38.9799	17.0349	10.932	6.36305	ZH16_S1	0.562984	--	ATPase, V0/A0 complex, subunit C/D
Novel00201	10.6487	2.23093	1.01768	0.845122	ZH16_S1	0.790497	--	--
arahy.KPS8UW	9.53667	0.454606	0	0.149095	ZH16_S1	0.952331	--	SAUR-like auxin-responsive protein family
arahy.T4ULTV	0.360716	0.118222	0.10324	0.0447632	ZH16_S1	0.672258	--	cytosolic endo-beta-N-acetylglucosaminidase
arahy.D59GD5	0.184263	0	0	0	ZH16_S1	1	--	Cytochrome P450 superfamily protein
arahy.TJ3DXD	0.173559	0	0	0	ZH16_S1	1	--	MLO-like protein 1-like [Glycine max]
arahy.AFL9HK	0.208407	0	0	0	ZH16_S1	1	--	NADH dehydrogenase subunit 7 n=2 Tax=Mesangiospermae RepID=G3EU36_CUCME
arahy.P05418	18.0576	8.95902	5.33476	3.12587	ZH16_S1	0.503863	--	formation of crista junctions protein 1-like isoform X2 [Glycine max]
arahy.RZ3VA1	1.9184	0.224499	0.148198	0.157432	ZH16_S1	0.882976	--	GTP-binding nuclear protein Ran-3 [Glycine max]
arahy.JNS4CJ	41.1264	8.67617	5.77727	2.85695	ZH16_S1	0.789037	--	cellulose synthase-like D3
Novel03690	5.0198	0.431697	0.570326	0.633213	ZH16_S1	0.873857	--	--
arahy.50I9RC	0.950959	0.0509181	0.0583579	0.201038	ZH16_S1	0.788594	--	ARM repeat superfamily protein
arahy.WX19GT	3.57556	0	0	0	ZH16_S1	1	--	Protein kinase family protein
Novel00998	4.83004	1.38816	2.08217	1.12166	ZH16_S1	0.568912	--	--
arahy.IZX6KC	31.7009	12.4508	6.85053	5.40394	ZH16_S1	0.607241	--	Clathrin adaptor complexes medium subunit family protein
arahy.PRY7KT	1.79161	0	0	0	ZH16_S1	1	--	Sulfite exporter TauE/SafE family protein
arahy.DYUI9Q	11.003	0.131039	0.111899	0	ZH16_S1	0.988091	--	SAUR-like auxin-responsive protein family
arahy.HRQ2U6	4.20991	0.544835	0	0	ZH16_S1	0.870583	--	synaptosomal-associated protein SNAP25-like 29
arahy.Z7C896	22.0391	4.31295	6.42869	2.60765	ZH16_S1	0.708305	--	Protein kinase superfamily protein
arahy.LYRN80	11.6132	3.36522	0.0898133	0	ZH16_S1	0.710224	--	blue copper protein-like [Glycine max]
arahy.YYF952	5.8914	2.66781	1.13137	0.273237	ZH16_S1	0.547168	--	ectonucleotide pyrophosphatase/phosphodiesterase
arahy.LWG93W	39.9052	6.12448	10.9025	15.6398	ZH16_S1	0.608078	--	Integral membrane Yip1 family protein
arahy.Z0JMUR	60.9883	9.03396	10.2534	11.8298	ZH16_S1	0.806031	--	calcium-transporting ATPase 8, plasma membrane-type protein
arahy.8PPI9D	79.132	3.21807	0.884761	0.707516	ZH16_S1	0.959333	--	cinnamyl alcohol dehydrogenase 9
Novel02924	12.3572	0.0908766	0	0	ZH16_S1	0.992646	--	--
arahy.84B366	27.7412	0	0	0	ZH16_S1	1	--	Cytochrome P450 superfamily protein
arahy.83S23U	16.8642	7.99597	5.30107	4.89321	ZH16_S1	0.52586	--	Golgi SNAP receptor complex member 1-1-like [Glycine max]
arahy.HHG878	0.435794	0.190547	0	0	ZH16_S1	0.56276	--	alpha/beta-Hydrolases superfamily protein
arahy.HZHI7V	60.9112	19.5882	17.9188	11.4459	ZH16_S1	0.678414	--	Protein of unknown function (DUF1068)
arahy.U456D3	1.41938	0.335851	0.0940295	0.0780004	ZH16_S1	0.763382	--	Acyl-CoA N-acyltransferases (NAT) superfamily protein
arahy.JEY2CC	59.6111	7.00206	5.97978	2.01558	ZH16_S1	0.882537	--	Polyketide cyclase/dehydrase and lipid transport superfamily protein
arahy.GR42S7	454.557	33.4294	96.9606	112.747	ZH16_S1	0.751963	--	senescence-associated protein, putative
arahy.CVQ7TS	3.47649	1.16653	1.01182	0.754396	ZH16_S1	0.664451	--	F-box/RNI-like superfamily protein
arahy.UU5TC6	14.6321	0.252194	4.3858	6.32485	ZH16_S1	0.567741	--	oligopeptide transporter 5
arahy.D9MA0I	95.3892	2.26393	4.29697	3.07541	ZH16_S1	0.954953	--	phloem protein 2-A9
arahy.SK3GF7	2.28573	0	0	0	ZH16_S1	1	--	SAUR-like auxin-responsive protein family
arahy.FT1LK2	6.9858	1.94615	1.76878	0.877125	ZH16_S1	0.721413	--	epsin-3-like [Glycine max]
arahy.VSRR5J	1.56435	0.0610602	0.104283	0	ZH16_S1	0.933338	--	Disease resistance-responsive (dirigent-like protein) family protein
arahy.S4HK2G	27.6503	7.44454	9.84585	6.12049	ZH16_S1	0.643916	--	DnaJ heat shock amine-terminal domain protein
arahy.B8M078	36.2793	0.792489	9.18623	7.72196	ZH16_S1	0.746791	--	unknown protein
arahy.KR6Y3F	46.5916	7.51042	6.07109	3.59779	ZH16_S1	0.838803	--	uncharacterized protein LOC100811998 [Glycine max]
arahy.01RQ4M	8.44429	0.631698	0.748947	0.297401	ZH16_S1	0.911307	--	alpha/beta-hydrolase superfamily protein
arahy.K69D77	12.7002	1.7634	1.3852	1.83701	ZH16_S1	0.855356	--	ATP-dependent RNA helicase, mitochondrial, putative
arahy.L8MD46	4.2533	0	0.192021	0.130158	ZH16_S1	0.954854	--	purple acid phosphatase 22
arahy.9SLV88	257.934	89.9222	83.9278	40.4052	ZH16_S1	0.651375	--	S-adenosyl-L-homocysteine hydrolase
arahy.UIG78U	104.758	19.6359	33.5757	23.2818	ZH16_S1	0.679492	--	polyamine oxidase 2
arahy.IGE775	80.726	19.7532	23.5454	19.7377	ZH16_S1	0.708329	--	kinesin light chain
arahy.ISB7YF	4.64853	0.707014	0.834667	0.736582	ZH16_S1	0.820445	--	GRAM domain-containing protein / ABA-responsive protein-related
arahy.I50STK	113.113	33.5727	22.2962	10.3408	ZH16_S1	0.703194	--	V-type proton ATPase subunit E-like isoform X1 [Glycine max]
arahy.TA3H6N	0.117716	0	0	0	ZH16_S1	1	--	Acyl-ACP thioesterase
arahy.MBM2VS	2.65425	0	0	0	ZH16_S1	1	--	Dormancy/auxin associated family protein
arahy.AK92GL	5.06102	0.114413	0.0964107	0.029227	ZH16_S1	0.977393	--	Chitinase family protein
arahy.02DA49	4.24543	1.28607	1.97895	1.52852	ZH16_S1	0.533863	--	AUTOPHAGY 8E
arahy.IC78MS	0.222264	0	0	0	ZH16_S1	1	--	1-aminocyclopropane-1-carboxylate oxidase homolog 1 [Glycine max]
arahy.YX6J26	0.121013	0	0	0.0356506	ZH16_S1	0.705399	--	nodulation-signaling pathway 1 protein-like [Glycine max]
arahy.KMEG19	1.86333	0.384225	0.0773585	0.25827	ZH16_S1	0.793797	--	Tetratricopeptide repeat (TPR)-like superfamily protein
arahy.N5GNDZ	0.134024	0	0	0	ZH16_S1	1	--	receptor serine/threonine kinase, putative
arahy.UF9ZNK	3.30046	0	0.506584	0.245728	ZH16_S1	0.846511	--	Cytochrome P450 superfamily protein
arahy.92QZ6T	2.10423	0.336418	0	0	ZH16_S1	0.840123	--	uncharacterized protein LOC100796883 [Glycine max]
arahy.33QXTL	49.1213	4.55847	3.40007	1.51075	ZH16_S1	0.9072	--	uncharacterized protein LOC100791257 [Glycine max]
arahy.LD1295	2.23675	0.910518	0.099805	0.0610279	ZH16_S1	0.592929	--	glucan endo-1,3-beta-glucosidase-like protein 2-like [Glycine max]
arahy.3P2HKF	14.4539	4.16491	5.08657	4.22598	ZH16_S1	0.648082	--	Exostosin family protein
arahy.EF0AHW	0.612221	0.125009	0.282643	0.23785	ZH16_S1	0.538332	--	Ankyrin repeat family protein
arahy.VBG525	18.2534	4.32118	8.56664	3.49461	ZH16_S1	0.530684	--	armadillo repeat only 2
arahy.A6MJL2	429.792	0.262079	1.0248	0.31144	ZH16_S1	0.997616	--	B12D protein
arahy.X4KYJQ	25.8967	2.48282	1.33008	3.47779	ZH16_S1	0.865705	--	sugar porter (SP) family MFS transporter
arahy.2W3ULI	23.4663	2.62749	3.00063	1.54115	ZH16_S1	0.87213	--	Tyrosine phosphatase family protein
arahy.IB7BS1	2.2528	0	0.0911123	0.029819	ZH16_S1	0.959556	--	myosin heavy chain-related
arahy.HXU5VM	12.2521	5.45137	4.04234	3.03186	ZH16_S1	0.555065	--	ubiquitin carboxyl-terminal hydrolase
arahy.7SAD34	10.4269	0	0	0	ZH16_S1	1	--	SAUR-like auxin-responsive protein family
Novel01054	2.85	0	0.58647	0	ZH16_S1	0.794221	--	--
arahy.PKW5X9	16.3599	4.29987	1.60727	0.327308	ZH16_S1	0.73717	--	monogalactosyldiacylglycerol synthase 2
arahy.7LRL61	1.80978	0.204412	0.0248355	0.0429524	ZH16_S1	0.887052	--	Oxysterol-binding family protein
arahy.SE5II1	26.632	8.92934	10.9728	8.6211	ZH16_S1	0.587987	--	Protein of unknown function (DUF1068)
arahy.TE5CG8	68.0487	28.3124	10.3886	7.68289	ZH16_S1	0.583939	--	succinyl-CoA ligase [ADP-forming] subunit beta
arahy.VLLC8N	2.83605	0.082305	0.0105275	0.0135541	ZH16_S1	0.970979	--	ATP-binding ABC transporter
arahy.S0PZ3T	0.254729	0	0.0289507	0	ZH16_S1	0.886347	--	nodulin MtN21 /EamA-like transporter family protein
arahy.NJ5037	39.5242	12.4304	2.50851	0.763475	ZH16_S1	0.685498	--	Tetratricopeptide repeat (TPR)-like superfamily protein
arahy.MJW2EP	14.8562	1.65157	1.19932	0.812328	ZH16_S1	0.88883	--	SAUR-like auxin-responsive protein family
arahy.1274C3	3.15033	0.627594	1.03437	0.349259	ZH16_S1	0.671662	--	protein FAM91A1-like isoform X1 [Glycine max]
arahy.LQNM08	4.63545	0.176615	0.123063	0.105112	ZH16_S1	0.961899	--	gamma carbonic anhydrase 1
arahy.TJ44DN	0.429091	0.1082	0.0275619	0	ZH16_S1	0.74784	--	Calcium-binding EF hand family protein
arahy.5PB5TU	0.439209	0	0	0	ZH16_S1	1	--	peroxisomal NAD-malate dehydrogenase 2
arahy.DU894F	2.55883	0.102303	0.332375	0.232134	ZH16_S1	0.870107	--	rRNA promoter binding protein n=1 Tax=Echinococcus multilocularis RepID=U6HG58_ECHMU
arahy.RNL9EZ	5.97597	0.551695	0.277592	0.143589	ZH16_S1	0.907681	--	nudix hydrolase homolog 13
arahy.QMZ0V0	0.279384	0.0206051	0.13417	0.109834	ZH16_S1	0.519766	--	Unknown protein
arahy.MX795F	64.6133	28.3497	2.58532	1.64127	ZH16_S1	0.561241	--	cinnamyl alcohol dehydrogenase 9
arahy.5L2UNJ	3106.29	89.1223	330.864	148.073	ZH16_S1	0.893486	--	Bifunctional inhibitor/lipid-transfer protein/seed storage 2S albumin superfamily protein
arahy.YYPI83	3.78877	0	0	0	ZH16_S1	1	--	Ribonuclease T2 family protein
arahy.7E5NA9	3.00688	0.0577828	0.0723846	0	ZH16_S1	0.975927	--	GDSL-like Lipase/Acylhydrolase superfamily protein
arahy.YZ918W	496.492	43.192	2.57366	0.390302	ZH16_S1	0.913006	--	Protein of unknown function, DUF642
arahy.DHC979	0.179695	0	0	0	ZH16_S1	1	--	Disease resistance protein (TIR-NBS-LRR class) family
arahy.TZ6N57	23.9316	4.9166	5.7543	4.77621	ZH16_S1	0.759552	--	tetratricopeptide repeat protein 1-like isoform X1 [Glycine max]
Novel03670	1.41326	0.334478	0.33644	0.110027	ZH16_S1	0.76194	--	--
arahy.L98YJM	23.2739	9.84489	5.67833	3.10538	ZH16_S1	0.576999	--	Potassium transporter family protein
arahy.16J66J	1.6545	0.309537	0.0146385	0.0188469	ZH16_S1	0.812912	--	1-aminocyclopropane-1-carboxylate synthase 4
arahy.39XEAH	0.497101	0	0	0	ZH16_S1	1	--	ADP/ATP carrier 2
arahy.ITY3SF	0.319513	0	0	0	ZH16_S1	1	--	MATE efflux family protein
arahy.IG8JQ5	0.651962	0.0528694	0	0.112763	ZH16_S1	0.82704	--	PI-PLC X domain-containing protein At5g67130-like [Glycine max]
arahy.ZLL7AW	8.21368	0.394241	0.36937	0.288728	ZH16_S1	0.952002	--	beta glucosidase 40
arahy.5NX4LW	5.30388	0.313543	0.232103	0.147042	ZH16_S1	0.940884	--	nine-cis-epoxycarotenoid dioxygenase 3
arahy.0BJ33Y	20.492	0	0.133267	0.0664959	ZH16_S1	0.993497	--	uncharacterized protein LOC100803605 [Glycine max]
arahy.QKR4AW	2.11263	0.165342	0.0102812	0.031018	ZH16_S1	0.921736	--	RAB GDP dissociation inhibitor 2
arahy.704HAC	68.5339	6.61215	12.0301	4.04121	ZH16_S1	0.824465	--	uncharacterized protein LOC100811015 [Glycine max]
arahy.GJ0FTP	49.8754	7.91147	9.76766	10.9053	ZH16_S1	0.781348	--	calcium-transporting ATPase 8, plasma membrane-type protein
arahy.JWFY4Y	0.103761	0	0	0	ZH16_S1	1	--	serine/arginine repetitive matrix protein 2-like [Glycine max]
arahy.IL2M1J	0.202479	0	0.0681421	0.0410092	ZH16_S1	0.66346	--	type I inositol 1,4,5-trisphosphate 5-phosphatase CVP2-like [Glycine max]
arahy.ZRIJ0L	0.837971	0.154735	0.018838	0.0140883	ZH16_S1	0.815345	--	ATP binding microtubule motor family protein
arahy.8W8UWC	30.9156	11.944	3.41144	2.2043	ZH16_S1	0.613657	--	ferrochelatase 1
arahy.QFB2YZ	44.0216	2.92643	0.770533	0.332168	ZH16_S1	0.933523	--	probable polygalacturonase-like [Glycine max]
arahy.TYLU08	1749.22	90.9792	312.43	164.735	ZH16_S1	0.821389	--	catalase 2
Novel01055	11.9905	0.817232	1.52532	0.375729	ZH16_S1	0.872789	--	--
arahy.Z4U2NE	18.7823	1.13493	0.11151	0.0626324	ZH16_S1	0.939575	--	tetraspanin-6 [Glycine max]
arahy.D34J8Q	1.54867	0	0	0	ZH16_S1	1	--	DHHC-type zinc finger family protein
arahy.RRY0UC	38.0628	3.32448	0.263368	0	ZH16_S1	0.912658	--	uncharacterized protein LOC100816650 isoform X2 [Glycine max]
arahy.IA9U5E	81.4801	1.70904	4.16755	2.66151	ZH16_S1	0.948852	--	glycerol-3-phosphate acyltransferase 4
arahy.YU8K39	3.02733	0.291736	0.46479	0.554053	ZH16_S1	0.816983	--	uridine kinase-like 2
arahy.V0FABF	86.6843	33.7057	37.7301	23.8595	ZH16_S1	0.564741	--	Class I glutamine amidotransferase-like superfamily protein
arahy.MHKX6K	0.295211	0.13954	0	0.0302089	ZH16_S1	0.52732	--	Cytochrome P450 superfamily protein
arahy.3WRE7I	3.53667	0.586889	0.475607	0.108852	ZH16_S1	0.834056	--	probable calcium-binding protein CML25-like [Glycine max]
arahy.9A188Y	0.651059	0.113695	0.121832	0.0359081	ZH16_S1	0.812872	--	Bifunctional polymyxin resistance arnA protein n=2 Tax=Papilionoideae RepID=G7JIF7_MEDTR
arahy.KY1FTE	2.9101	0	0.0152981	0	ZH16_S1	0.994743	--	uncharacterized protein LOC100811541 isoform X2 [Glycine max]
arahy.SYJH9Z	0.523024	0.0468374	0	0.111318	ZH16_S1	0.787165	--	uncharacterized protein LOC102661124 isoform X2 [Glycine max]
arahy.8Q6BIU	5.38088	1.69699	0.889494	0.605021	ZH16_S1	0.684626	--	short-chain dehydrogenase-reductase B
arahy.C1QEAM	0.122945	0	0	0	ZH16_S1	1	--	flocculation protein FLO11-like isoform X3 [Glycine max]
arahy.KZ47MP	4.62194	1.63548	0.687012	0.338242	ZH16_S1	0.646148	--	Haloacid dehalogenase-like hydrolase (HAD) superfamily protein
arahy.C7APUF	1.44279	0	0.0407521	0.0178831	ZH16_S1	0.971755	--	protein HAPLESS 2-like isoform X2 [Glycine max]
arahy.3NX5WZ	1.49388	0	0	0	ZH16_S1	1	--	major intrinsic protein (MIP) family transporter
arahy.FJ1AK4	1190.1	167.442	147.879	67.6877	ZH16_S1	0.859304	--	Methionine S-adenosyl transferase n=1 Tax=Detonula confervacea RepID=B9ZZX3_DETCO
arahy.K7ANH9	1.60519	0.430158	0.0843986	0.799033	ZH16_S1	0.502218	--	ROTUNDIFOLIA like 2
arahy.V8KDVK	66.2867	9.11721	6.08385	6.05178	ZH16_S1	0.862458	--	O-acetyltransferase family protein
arahy.8L3EY1	0.153636	0	0	0.0108204	ZH16_S1	0.929571	--	Actin binding protein, putative n=1 Tax=Ricinus communis RepID=B9SA03_RICCO
arahy.71G8UT	9.01344	4.22519	1.01974	0.091263	ZH16_S1	0.531235	--	Pectate lyase family protein
arahy.P2PL73	74.9436	5.36101	1.27378	0.919021	ZH16_S1	0.928466	--	probable polygalacturonase-like [Glycine max]
arahy.Z27S6C	0.779536	0.0235448	0	0.0604019	ZH16_S1	0.922516	--	uncharacterized protein LOC100796503 isoform X5 [Glycine max]
arahy.DSQC6N	0.669808	0.279258	0	0	ZH16_S1	0.583078	--	uncharacterized protein LOC100781253 [Glycine max]
arahy.5XLW1T	0.990509	0.0500169	0.0872528	0.0757532	ZH16_S1	0.911911	--	ATP synthase, F1 beta subunit
arahy.M7A5MM	61.4601	2.47627	11.6372	9.87009	ZH16_S1	0.810655	--	Protein kinase superfamily protein
arahy.MDT0NR	1.63597	0.0318358	0.0271857	0	ZH16_S1	0.98054	--	protein YLS7-like [Glycine max]
Novel01307	2.33299	0.688427	0.270193	0.174933	ZH16_S1	0.704916	--	--
arahy.4F6GHG	0.183239	0.0160714	0.0402654	0.0237353	ZH16_S1	0.780257	--	putative indole-3-acetic acid-amido synthetase GH3.9
arahy.YQ8SXU	6.99916	0.548379	0.548618	0.0660481	ZH16_S1	0.921616	--	short-chain dehydrogenase-reductase B
arahy.N912IN	18.8208	7.85993	6.07129	4.54983	ZH16_S1	0.582382	--	DNA polymerase III subunit gamma/tau
arahy.HAI9AH	37.5712	4.85902	1.52313	0.950357	ZH16_S1	0.870672	--	monogalactosyldiacylglycerol synthase 2
arahy.P7YJ1Q	18.2841	5.71978	2.69356	2.82938	ZH16_S1	0.687172	--	pleckstrin-like (PH) and lipid-binding START domain protein
arahy.MZF9QJ	2.576	1.20307	0.220603	0	ZH16_S1	0.53297	--	transmembrane protein 45B-like [Glycine max]
arahy.8X0KIE	49.6387	5.15869	7.70901	6.07365	ZH16_S1	0.844697	--	probable glucan 1,3-beta-glucosidase A-like [Glycine max]
arahy.JA6J2D	11.275	0.0772487	0.0705915	0.0310341	ZH16_S1	0.993149	--	UDP-Glycosyltransferase superfamily protein
Novel02759	2.41474	0.145327	0.0930751	0.300186	ZH16_S1	0.875686	--	--
arahy.TZWM8X	0.763366	0	0	0	ZH16_S1	1	--	ACT domain repeat 3
arahy.GP740U	2.96651	0.513452	1.18194	1.00641	ZH16_S1	0.601572	--	uncharacterized protein At4g22758-like isoform X2 [Glycine max]
arahy.42QIIL	93.337	3.32854	2.22544	0.735516	ZH16_S1	0.964339	--	putative pectinesterase/pectinesterase inhibitor 22 [Glycine max]
arahy.Q7CDUE	29.6589	11.1745	3.93615	0.926191	ZH16_S1	0.623231	--	Cysteine proteinases superfamily protein
arahy.S7A2EF	43.7015	5.35178	0.354253	0.0511043	ZH16_S1	0.877538	--	cytokinin oxidase/dehydrogenase 1
arahy.AYFT4X	16.2352	2.80371	0.85876	1.14977	ZH16_S1	0.827306	--	Chalcone-flavanone isomerase family protein
arahy.RY273S	0.738501	0.0166925	0	0	ZH16_S1	0.977397	--	Membrane transporter D1 n=3 Tax=Andropogoneae RepID=B6U4Q3_MAIZE
arahy.4F68EX	115.452	23.2807	48.3657	22.0737	ZH16_S1	0.581074	--	Galactose oxidase/kelch repeat superfamily protein
arahy.SX2030	2.05341	0	0	0	ZH16_S1	1	--	Mitochondrial ATP synthase subunit G protein
arahy.0T4FW3	13.1433	6.11144	2.9384	2.451	ZH16_S1	0.535013	--	protein SHI RELATED SEQUENCE 1-like [Glycine max]
arahy.KFH0Q4	15.3989	0.0575225	0.119542	0.0442071	ZH16_S1	0.992237	--	glucan endo-1,3-beta-glucosidase 12-like [Glycine max]
arahy.03K4CT	3.88278	0.579687	0.516986	0.603099	ZH16_S1	0.844673	--	receptor-like protein kinase 1
arahy.YDB2MQ	1.86649	0	0.0345162	0	ZH16_S1	0.981507	--	Protein kinase superfamily protein
arahy.JBZ72W	5.98633	0.48172	0.111899	0	ZH16_S1	0.91953	--	SAUR-like auxin-responsive protein family
arahy.EMV9BJ	0.171407	0	0	0	ZH16_S1	1	--	rho GTPase-activating protein REN1-like isoform X3 [Glycine max]
arahy.DCQ16M	13.7589	6.60341	3.65829	3.93791	ZH16_S1	0.520063	--	E3 ubiquitin-protein ligase RGLG2-like isoform X4 [Glycine max]
arahy.YHAP2I	136.431	15.8173	23.6876	9.41767	ZH16_S1	0.826377	--	alcohol dehydrogenase 1
arahy.X69TWL	2.0507	0.836179	0.577895	0.0770979	ZH16_S1	0.592247	--	non-specific phospholipase C3
arahy.RRQV4B	3.53578	0.113907	0.0741319	0	ZH16_S1	0.967784	--	Protein kinase superfamily protein
arahy.BWP7WA	31.597	0.232715	0	0	ZH16_S1	0.992635	--	Unknown protein
arahy.ZEQ2YP	0.185726	0	0	0	ZH16_S1	1	--	Unknown protein
arahy.4H2E4D	72.465	1.06023	0.57481	2.23855	ZH16_S1	0.969109	--	transmembrane protein, putative
arahy.YM2AH8	575.944	156.266	38.7882	15.8286	ZH16_S1	0.728679	--	ADP,ATP carrier protein 1, mitochondrial-like [Glycine max]
arahy.QC4UQW	12.3606	4.12401	4.59751	1.26367	ZH16_S1	0.628051	--	Cell wall protein-like n=3 Tax=Oryza RepID=Q8H3Y9_ORYSJ
arahy.97W2GY	88.8685	26.7186	16.5452	7.4421	ZH16_S1	0.699347	--	actin depolymerizing factor 2
arahy.SW5XY7	4.96288	0.823558	0.723542	1.32405	ZH16_S1	0.733209	--	uncharacterized protein LOC100806882 isoform X2 [Glycine max]
arahy.CSQB0P	0.391822	0	0	0	ZH16_S1	1	--	Cytochrome P450 superfamily protein
arahy.N8H2W4	9.793	0	0	0	ZH16_S1	1	--	SAUR-like auxin-responsive protein family
arahy.H7N144	0.770819	0.0487933	0	0	ZH16_S1	0.936699	--	protein serine/threonine kinases
arahy.CQ14AB	55.3193	0.0604797	0.075763	0	ZH16_S1	0.99863	--	early nodulin-like protein 3-like [Glycine max]
arahy.3D7DCX	1.32611	0.618192	0.0636062	0.113252	ZH16_S1	0.53383	--	disease resistance protein (TIR-NBS-LRR class), putative
arahy.XVK42B	5.81254	0.160309	0	0.0440624	ZH16_S1	0.97242	--	glucuronoxylan 4-O-methyltransferase 1-like [Glycine max]
arahy.9M6DNI	27.8789	9.93366	0.746814	0.307349	ZH16_S1	0.643685	--	transmembrane amino acid transporter family protein
arahy.X7YN2B	14.2962	0.285095	0.527826	0.21058	ZH16_S1	0.963079	--	glucan endo-1,3-beta-glucosidase 11-like [Glycine max]
arahy.JBT1X5	38.5344	13.3627	8.67247	5.36268	ZH16_S1	0.653227	--	Phosphoglycerate mutase family protein
arahy.Z7H12U	22.6006	11.2194	4.53753	3.66873	ZH16_S1	0.503579	--	Electron transporter/thiol-disulfide exchange intermediate protein n=1 Tax=Arachis hypogaea RepID=B4UW61_ARAHY
arahy.I0T1AJ	0.509386	0.215535	0.220198	0.0316264	ZH16_S1	0.567719	--	Eukaryotic aspartyl protease family protein
arahy.ST16AZ	0.197768	0.0336095	0	0	ZH16_S1	0.830056	--	Protein of unknown function (DUF677)
arahy.MNA3JK	0.233759	0.0406359	0.0173502	0.027979	ZH16_S1	0.826163	--	disease resistance protein (TIR-NBS-LRR class)
arahy.XN1C7B	16.66	7.3637	5.86829	4.42561	ZH16_S1	0.558001	--	protoheme IX farnesyltransferase
arahy.T4LNKK	15.9464	4.72345	3.60425	2.45874	ZH16_S1	0.703792	--	Hypoxanthine-guanine phosphoribosyltransferase
arahy.T5Y52R	0.126663	0.0315061	0	0.0201207	ZH16_S1	0.751261	--	AMP-dependent synthetase and ligase family protein
arahy.TPY4ZQ	19.7805	0.299464	7.11625	4.14882	ZH16_S1	0.64024	--	S12-like, 30S ribosomal protein S12 subfamily protein
arahy.7A1A6G	8.20321	0.428894	1.0247	1.21768	ZH16_S1	0.85156	--	Protein of unknown function (DUF1639)
arahy.KGVY1V	0.126959	0	0	0	ZH16_S1	1	--	P-loop containing nucleoside triphosphate hydrolases superfamily protein
arahy.WMI0Y6	0.181487	0	0	0	ZH16_S1	1	--	uncharacterized protein LOC102663177 [Glycine max]
arahy.20WX6S	1.72764	0	0	0	ZH16_S1	1	--	aldo/keto reductase family oxidoreductase
arahy.0UNU52	0.850541	0	0.00971929	0	ZH16_S1	0.988573	--	seed linoleate 9S-lipoxygenase
Novel02541	1.16147	0	0.141507	0.183148	ZH16_S1	0.842314	--	--
arahy.Q8AGNQ	38.1168	12.2715	5.43116	4.35517	ZH16_S1	0.678054	--	Clathrin, heavy chain
arahy.BEHF6G	48.5308	11.1764	8.7405	6.66163	ZH16_S1	0.769705	--	Cytochrome c oxidase, subunit Vib family protein
arahy.B5AM0N	32.3374	4.22939	9.69533	4.75146	ZH16_S1	0.700182	--	photosynthetic electron transfer B chrC:74841-76292 FORWARD
arahy.45SMBX	70.513	14.6968	15.9971	14.9345	ZH16_S1	0.773133	--	kinesin light chain
arahy.1M4EYD	1.13226	0.488807	0.0580514	0.126708	ZH16_S1	0.568289	--	receptor-like protein kinase 2
arahy.UMIX20	8.6265	1.39735	1.51931	2.47996	ZH16_S1	0.712519	--	pollen-specific protein SF21 [Glycine max]
arahy.A53T08	4.54427	0.13561	0.169879	0	ZH16_S1	0.962617	--	transmembrane protein, putative
arahy.01RPY8	18.461	2.53089	4.52273	2.1079	ZH16_S1	0.755012	--	Protein of unknown function (DUF581)
arahy.6C48SL	3.44081	0.906663	1.36979	1.0142	ZH16_S1	0.601899	--	photosystem II CP43 chlorophyll apoprotein
arahy.KST8W5	3.82101	0.234058	1.17569	0.311847	ZH16_S1	0.69231	--	RING/U-box superfamily protein
Novel00380	4.89894	0.680401	0.412532	0.254053	ZH16_S1	0.861113	--	--
arahy.FT2DSH	7.64132	1.31739	0.509701	0.127515	ZH16_S1	0.827597	--	FKBP-like peptidyl-prolyl cis-trans isomerase family protein
arahy.5FGK1K	16.824	7.73306	5.5555	5.20776	ZH16_S1	0.540355	--	WD repeat-containing protein 44-like [Glycine max]
arahy.029YZL	0.235922	0	0	0	ZH16_S1	1	--	Calcium-binding EF-hand family protein
arahy.I7EQFT	9.64504	2.77921	3.73137	3.32408	ZH16_S1	0.613131	--	Protein kinase superfamily protein
arahy.W2BU8F	238.72	69.8726	64.2395	29.9524	ZH16_S1	0.707303	--	uncharacterized protein At5g39570-like isoform X1 [Glycine max]
arahy.ZBJ4Q7	3.38858	0.180211	0.236336	0.182874	ZH16_S1	0.930255	--	polyamine oxidase 1
arahy.CK11CG	0.330172	0	0	0	ZH16_S1	1	--	NAC domain protein,
arahy.H4RR8N	2.63934	0.561127	0.202333	0.171473	ZH16_S1	0.787399	--	S-norcoclaurine synthase-like protein
arahy.U3WWWH	35.9369	3.20544	5.79417	2.56218	ZH16_S1	0.838768	--	2,3-diketo-5-methylthio-1-phosphopentane phosphatase
arahy.VQPM3J	6.01332	0.162227	0	0	ZH16_S1	0.973022	--	O-methyltransferase family protein
arahy.NJ1UU6	1.09485	0	0	0	ZH16_S1	1	--	disease resistance protein (TIR-NBS-LRR class), putative
Novel04985	2.74739	0.413342	0.356451	0.988267	ZH16_S1	0.640289	--	--
Novel04839	0.548336	0.234813	0.211423	0.230302	ZH16_S1	0.571771	--	--
arahy.0R79PA	10.7275	0.950287	0.223841	0.0821114	ZH16_S1	0.911416	--	NAD(P)-binding Rossmann-fold superfamily protein
arahy.IE4QSS	3.39252	0	1.55975	0.136891	ZH16_S1	0.540239	--	Macaca fascicularis brain cDNA clone: QflA-19312, similar to human similar to rRNA intron-encoded homing endonuclease(LOC391446), mRNA, RefSeq: XM_372959.1 n=2 Tax=Macaca fascicularis RepID=I7GIE7_MACFA
arahy.A7903H	0.13685	0.0374599	0.0319883	0	ZH16_S1	0.726271	--	2-aminoethanethiol dioxygenase-like [Glycine max]
arahy.CZ3KL5	64.0217	6.4756	10.8467	11.0435	ZH16_S1	0.827503	--	putative pectinesterase/pectinesterase inhibitor 24-like [Glycine max]
arahy.ECT8PE	0.137718	0	0	0	ZH16_S1	1	--	Unknown protein
arahy.ES9RY0	24.5843	10.4345	6.88131	5.10381	ZH16_S1	0.575562	--	RNA-binding protein 1-like [Glycine max]
arahy.4V8RU5	1.02078	0	0	0	ZH16_S1	1	--	polygalacturonase-like [Glycine max]
arahy.1T462X	0.917523	0.339063	0.347871	0.358132	ZH16_S1	0.609675	--	cellulose synthase like E1
arahy.5QUI8A	105.982	7.73904	14.0447	6.97953	ZH16_S1	0.86748	--	putative glycerol-3-phosphate transporter 1-like isoform X1 [Glycine max]
arahy.90YMMC	7.26843	2.48029	0.545811	0.250517	ZH16_S1	0.658758	--	septum-promoting GTP-binding protein 1-like [Glycine max]
arahy.55PBKN	64.8573	0.140377	0	0.206231	ZH16_S1	0.99682	--	DUF1997 family protein
arahy.QHE7IT	94.5961	42.2875	34.0251	25.0599	ZH16_S1	0.552968	--	Quinone reductase family protein
arahy.GQ31QR	11.7913	4.5516	3.76995	2.82182	ZH16_S1	0.613988	--	exocyst complex component SEC6-like [Glycine max]
arahy.NKM11E	26.5889	6.99416	6.03552	5.4634	ZH16_S1	0.736952	--	phosphatidylinositol-4-phosphate 5-kinase 1
arahy.27E6QC	299.482	1.22658	5.19918	2.58059	ZH16_S1	0.982639	--	Cell wall protein Exp4 n=1 Tax=Mirabilis jalapa RepID=Q84L38_MIRJA
arahy.5996BE	53.8991	15.2074	12.8633	14.1462	ZH16_S1	0.717854	--	Uncharacterized protein family (UPF0016)
arahy.3K66AC	5.45829	0	0	0	ZH16_S1	1	--	SAUR-like auxin-responsive protein family
arahy.8Y07GA	0.541288	0.106239	0.0541252	0.0936082	ZH16_S1	0.803729	--	unknown protein
arahy.I3VYS4	26.4289	9.74547	5.07881	4.72861	ZH16_S1	0.631258	--	SEC1 family transport protein SLY1-like [Glycine max]
arahy.ZGF4SU	0.282805	0.0253264	0.0622626	0.0260643	ZH16_S1	0.779839	--	uncharacterized protein At1g04910-like [Glycine max]
arahy.J3IYG2	0.110495	0	0	0	ZH16_S1	1	--	DUF223 domain protein
arahy.FU0M5P	0.191889	0.0392677	0	0	ZH16_S1	0.795363	--	uncharacterized protein LOC100810515 [Glycine max]
arahy.GA90U3	29.2222	11.3722	7.69739	3.13759	ZH16_S1	0.610838	--	prephenate dehydrogenase family protein
arahy.90TW9W	1.13092	0	0	0	ZH16_S1	1	--	Unknown protein
arahy.H03I4T	15.1826	3.29696	1.62469	2.20626	ZH16_S1	0.782845	--	Core-2/I-branching beta-1,6-N-acetylglucosaminyltransferase family protein
arahy.Q5UK0W	22.6032	8.33064	5.35091	2.67398	ZH16_S1	0.63144	--	FASCICLIN-like arabinogalactan protein 16 precursor
arahy.0E0YFN	0.601261	0	0.297721	0.167222	ZH16_S1	0.504839	--	Unknown protein
arahy.3R1ZZ8	79.6833	24.8379	10.8361	9.25705	ZH16_S1	0.688292	--	Dihydrolipoyllysine-residue succinyltransferase component of 2-oxoglutarate dehydrogenase complex n=3 Tax=Papilionoideae RepID=G7K3L9_MEDTR
arahy.W5QVW0	13.1756	4.93805	2.50551	1.76975	ZH16_S1	0.625212	--	pleckstrin-like (PH) and lipid-binding START domain protein
arahy.BX8PA5	488.961	55.798	142.523	87.0278	ZH16_S1	0.708518	--	plasma membrane intrinsic protein 1B
arahy.54PPAU	137.831	17.788	29.5097	22.5874	ZH16_S1	0.7859	--	lysine-ketoglutarate reductase/saccharopine dehydrogenase
arahy.ZNJT9X	0.638378	0.173602	0.216279	0.0451955	ZH16_S1	0.661205	--	nodulin MtN21 /EamA-like transporter family protein
arahy.89FLHR	11.5436	4.70676	1.72378	1.11164	ZH16_S1	0.592262	--	Amino acid dehydrogenase family protein
arahy.AZ80GT	0.109264	0.0433014	0.0369766	0	ZH16_S1	0.603699	--	ornithine-delta-aminotransferase
arahy.2Q8XNQ	21.5386	9.06106	7.29246	6.16341	ZH16_S1	0.57931	--	kelch domain-containing protein 4-like isoform X3 [Glycine max]
arahy.N2L19B	16.5231	7.91537	3.48733	3.95929	ZH16_S1	0.520951	--	alpha-glucan water dikinase
arahy.A09BTR	1.36253	0.291145	0	0	ZH16_S1	0.786321	--	receptor-like kinase 1
arahy.TS3HWZ	33.5962	15.1638	4.08807	3.50645	ZH16_S1	0.548645	--	ABC transporter family protein (ATP-binding component)
arahy.PE1JEE	0.393585	0.04426	0	0	ZH16_S1	0.887547	--	polygalacturonase QRT3-like [Glycine max]
arahy.DP3R7M	32.9081	3.99998	2.08413	1.42595	ZH16_S1	0.87845	--	glucan endo-1,3-beta-glucosidase 1-like [Glycine max]
arahy.LRYK2A	0.612845	0	0	0	ZH16_S1	1	--	receptor-like protein kinase 2
arahy.N0MV1J	39.8829	1.06552	0.106726	0.0888012	ZH16_S1	0.973284	--	Transmembrane amino acid transporter family protein
arahy.BL92CI	1.24387	0	0	0	ZH16_S1	1	--	uncharacterized protein LOC102668673 isoform X2 [Glycine max]
arahy.1HE4TQ	53.3701	12.2653	8.24916	4.90824	ZH16_S1	0.770184	--	transmembrane 9 superfamily member 4-like [Glycine max]
arahy.AJY7W8	70.9762	21.7989	7.77261	6.67131	ZH16_S1	0.69287	--	Cysteine proteinases superfamily protein
arahy.L0ANC4	24.3886	4.70266	4.17332	3.25939	ZH16_S1	0.807178	--	ATP-binding ABC transporter
arahy.CG3D8R	15.0701	0.928791	1.35386	5.17625	ZH16_S1	0.656521	--	NADH-ubiquinone oxidoreductase chain n=3 Tax=Pentapetalae RepID=G7I8V1_MEDTR
arahy.V5CRDX	22.555	6.6393	0.800914	0.120253	ZH16_S1	0.705639	--	uncharacterized protein LOC100779101 isoform X2 [Glycine max]
arahy.AA4TUV	9.94038	0.586953	3.83696	2.69776	ZH16_S1	0.614003	--	senescence-associated protein, putative
arahy.5P0VXH	1.38943	0	0	0	ZH16_S1	1	--	probable sugar phosphate/phosphate translocator [Glycine max]
arahy.UJ6S9W	10.7715	4.05359	3.74462	1.10806	ZH16_S1	0.623673	--	isoflavone reductase homolog 2 [Glycine max]
arahy.87CALG	0.370394	0	0	0	ZH16_S1	1	--	Unknown protein
arahy.2G26YP	0.732603	0.305438	0	0	ZH16_S1	0.583078	--	Unknown protein
arahy.0B7H6P	11.2329	5.23232	4.62126	3.89402	ZH16_S1	0.534196	--	uncharacterized protein LOC100790782 isoform X1 [Glycine max]
arahy.06I94X	0.879615	0.211976	0.151632	0.115785	ZH16_S1	0.759013	--	Plant protein of unknown function (DUF946)
arahy.K9Y2CB	2.19179	0	0	0.0560001	ZH16_S1	0.97445	--	Pectate lyase family protein
arahy.KH6B5H	10.8938	2.6413	0.765053	0.59126	ZH16_S1	0.757541	--	F-box/RNI-like superfamily protein
arahy.40LWFJ	3.13807	0.159788	0.504125	0.643332	ZH16_S1	0.794991	--	serine/threonine protein kinase 1
arahy.DPH3X5	0.210842	0	0	0	ZH16_S1	1	--	DEAD-box ATP-dependent RNA helicase-like protein
arahy.R03NAB	155.596	64.0198	62.8446	40.2965	ZH16_S1	0.588552	--	NADH dehydrogenase 1 alpha subcomplex subunit 5 n=2 Tax=Ictalurus RepID=E3TCY2_9TELE
arahy.8M77KD	0.115708	0	0	0	ZH16_S1	1	--	disease-resistance response protein
arahy.V3YXUH	178.248	0.120489	0.0795375	0.0836689	ZH16_S1	0.999324	--	MATE efflux family protein
arahy.2Z587T	151.815	38.6886	60.3553	24.9201	ZH16_S1	0.60244	--	DCD (Development and Cell Death) domain protein
Novel00823	11.025	1.44284	3.21766	0.428976	ZH16_S1	0.708149	--	--
arahy.EEUI5F	2.60303	0.0596647	0.244681	0.165433	ZH16_S1	0.906002	--	sucrose phosphate synthase 3F
arahy.2F2W1G	52.1793	11.9776	5.02572	2.64088	ZH16_S1	0.770454	--	probable methyltransferase PMT2-like [Glycine max]
arahy.X51F92	2.89562	0.943501	1.06244	0.877947	ZH16_S1	0.633087	--	lysosomal beta glucosidase-like isoform X2 [Glycine max]
arahy.NBD2TE	10.2653	1.35504	1.98774	1.92079	ZH16_S1	0.806363	--	Chloroplast-targeted copper chaperone protein
arahy.635IPP	0.465754	0.0547821	0.0155935	0	ZH16_S1	0.88238	--	alpha/beta-hydrolase superfamily protein
arahy.W8ALCK	1.29017	0	0.0725171	0	ZH16_S1	0.943793	--	HXXXD-type acyl-transferase family protein
arahy.H5UTXB	21.9365	3.54173	0.692054	0.315369	ZH16_S1	0.838546	--	diphosphate--fructose-6-phosphate 1-phosphotransferase n=1 Tax=Proteiniphilum acetatigenes RepID=UPI0003652DBE
Novel01026	21.6449	7.52433	4.40127	3.77413	ZH16_S1	0.652374	--	--
arahy.8WED6E	8.92981	0	0.0395408	0	ZH16_S1	0.995572	--	Protein kinase superfamily protein
arahy.DZ04CN	8.38518	0.984508	0.322544	0.471411	ZH16_S1	0.882589	--	UBX domain-containing protein
arahy.LF73V2	27.0553	0.210822	0.6719	0.543665	ZH16_S1	0.975166	--	F-box family protein
arahy.B7V00M	5.04521	1.74119	1.2684	0.466999	ZH16_S1	0.654882	--	uncharacterized protein LOC100788941 isoform X2 [Glycine max]
arahy.EYAH79	8.11126	0	0.0369309	0.0552386	ZH16_S1	0.99319	--	unknown protein
arahy.28H6X3	46.597	8.49945	4.73262	2.84195	ZH16_S1	0.817597	--	Protein of Unknown Function (DUF239)
arahy.JJV6C7	72.0492	6.29985	9.37942	6.89253	ZH16_S1	0.869819	--	Eukaryotic aspartyl protease family protein
arahy.XU6D8H	0.205686	0	0	0	ZH16_S1	1	--	NB-ARC domain disease resistance protein
arahy.MV9AMF	4.95507	2.29952	2.22674	1.3417	ZH16_S1	0.535926	--	uncharacterized protein LOC100797416 isoform X2 [Glycine max]
arahy.H1BIFD	44.178	8.28343	11.9244	7.93736	ZH16_S1	0.730084	--	RNA-binding protein 1-like [Glycine max]
arahy.F3FSDQ	0.355823	0	0.0307062	0	ZH16_S1	0.913704	--	sucrose transporter 4
arahy.M8R2T1	22.8109	0	0	0	ZH16_S1	1	--	S-ribonuclease n=5 Tax=Prunus RepID=A8R5J7_PRUMU
arahy.WNMX7W	34.8861	2.17852	3.49007	0.589842	ZH16_S1	0.899958	--	putative indole-3-acetic acid-amido synthetase GH3.9
arahy.VH3KGW	2.58309	0.296579	0.431484	0.9285	ZH16_S1	0.640547	--	Senescence/dehydration-associated protein-related
arahy.4S7XPI	29.6684	10.8341	5.66509	4.17019	ZH16_S1	0.634828	--	Transcription initiation factor TFIIE, beta subunit
arahy.MV6I8X	18.1728	8.54123	5.52098	3.99957	ZH16_S1	0.529999	--	protein serine/threonine phosphatases
Novel01306	121.003	11.1804	4.45239	1.99511	ZH16_S1	0.907602	--	--
arahy.MPCU6S	14.6237	6.11723	3.63881	3.86721	ZH16_S1	0.58169	--	ADP-ribosylation factor GTPase-activating protein AGD3-like [Glycine max]
arahy.18Y7ZR	0.344988	0	0.0784176	0.135621	ZH16_S1	0.606881	--	Unknown protein
arahy.U1QF1K	0.149191	0.0511729	0	0	ZH16_S1	0.656998	--	ATP-dependent RNA helicase, putative
arahy.J6ELEK	17.9369	2.51043	4.05555	2.69598	ZH16_S1	0.773899	--	Protein phosphatase 2C family protein
arahy.D6R8EP	0.319366	0.0688312	0.0729092	0	ZH16_S1	0.771707	--	disease resistance protein (TIR-NBS-LRR class)
arahy.SB83T1	6.4519	0.333795	0.0272689	0	ZH16_S1	0.948264	--	beta-fructofuranosidase
arahy.VZVD9A	80.3002	28.4764	5.75967	1.36739	ZH16_S1	0.645376	--	Disease resistance-responsive (dirigent-like protein) family protein
arahy.SN6VSJ	11.0037	4.75921	2.96392	2.21405	ZH16_S1	0.567492	--	mitochondrial substrate carrier family protein B-like [Glycine max]
arahy.ZWND97	29.0173	11.4568	7.53943	4.98454	ZH16_S1	0.605174	--	phosphatidylinositol transfer protein CSR1-like [Glycine max]
arahy.J0HSVP	321.274	24.2726	67.7132	40.5809	ZH16_S1	0.789236	--	plasma membrane intrinsic protein 2
arahy.Q25QIN	4.08928	0.224119	0.841156	0.101391	ZH16_S1	0.794302	--	trafficking protein particle complex subunit-like protein
Novel01646	1.27247	0	0.0555108	0.044563	ZH16_S1	0.956375	--	--
arahy.GQT8P7	2.07116	0.859089	0.477547	0.418446	ZH16_S1	0.585213	--	zinc finger CCCH domain-containing protein 48-like isoform X2 [Glycine max]
arahy.2B7LY6	0.356979	0	0	0	ZH16_S1	1	--	UDP-Glycosyltransferase superfamily protein
arahy.92S4AT	9.88834	3.20186	3.82508	2.49105	ZH16_S1	0.613173	--	Patatin-like phospholipase family protein
arahy.FE00XT	0.279781	0.0245476	0	0	ZH16_S1	0.912261	--	receptor-like serine/threonine kinase 2
arahy.2U24C8	0.536166	0.0781897	0.0373946	0.0393467	ZH16_S1	0.854169	--	Peroxidase superfamily protein
arahy.G6F8T8	1.149	0	0.0127899	0	ZH16_S1	0.988869	--	alkaline/neutral invertase
arahy.ULB97Z	19.9261	9.77287	8.23504	5.5663	ZH16_S1	0.509546	--	GDSL esterase/lipase [Glycine max]
arahy.L65238	0.211049	0	0	0	ZH16_S1	1	--	Unknown protein
arahy.N91VU8	0.786723	0.348134	0	0	ZH16_S1	0.557488	--	Unknown protein
arahy.LV0WMB	20.762	3.30895	2.97619	4.07927	ZH16_S1	0.803523	--	short-chain dehydrogenase/reductase
arahy.D7TB4J	96.5118	36.944	15.896	7.95143	ZH16_S1	0.617208	--	cytochrome B-c1 complex subunit 6
arahy.KJ11LV	18.356	1.55721	4.55919	2.41074	ZH16_S1	0.751624	--	NADH-ubiquinone oxidoreductase chain n=3 Tax=Mesangiospermae RepID=G7I8X8_MEDTR
arahy.Z1WCUM	33.5935	8.1348	5.62546	3.94202	ZH16_S1	0.757846	--	Pectate lyase family protein
arahy.E295CW	379.298	15.4285	15.3331	11.0601	ZH16_S1	0.959324	--	Lipid transfer protein
Novel01398	72.0992	20.8103	2.50405	1.22545	ZH16_S1	0.711366	--	--
arahy.1V4JC0	0.249806	0.0475622	0.0746113	0	ZH16_S1	0.701323	--	UPF0481 protein [Glycine max]
arahy.8WE36P	35.6713	16.1113	10.6281	8.20765	ZH16_S1	0.54834	--	clathrin coat assembly protein AP180-like [Glycine max]
arahy.G1B0F8	0.569532	0	0	0	ZH16_S1	1	--	uncharacterized protein LOC102668158 [Glycine max]
arahy.RC1NFA	7.73037	0	0	0	ZH16_S1	1	--	organ-specific protein S2-like isoform X1 [Glycine max]
arahy.V31KAL	5.50942	0.423107	0.393315	0.105203	ZH16_S1	0.923203	--	GDSL-like Lipase/Acylhydrolase superfamily protein
arahy.HFN0DS	17.611	0.169983	0	0	ZH16_S1	0.990348	--	SAUR-like auxin-responsive protein family
arahy.V0K005	0.219607	0.0796075	0	0.0508397	ZH16_S1	0.6375	--	uroporphyrinogen decarboxylase, chloroplastic-like [Glycine max]
Novel01419	8.79736	0.0966271	0.204276	0.0396971	ZH16_S1	0.97678	--	--
arahy.CU0EG8	26.8863	11.0967	9.68664	6.95774	ZH16_S1	0.587274	--	ataxin-3 homolog isoform X1 [Glycine max]
Novel02525	3.72894	0.687502	0.298439	0.497675	ZH16_S1	0.815631	--	--
arahy.YRMJ3W	33.0383	10.497	8.54174	6.79314	ZH16_S1	0.682277	--	alpha/beta-Hydrolases superfamily protein
arahy.T7FQKJ	371.909	2.24327	2.90456	0.875919	ZH16_S1	0.99219	--	asparagine synthetase 3
arahy.BH9RMT	0.146901	0	0	0	ZH16_S1	1	--	Cytochrome P450 superfamily protein
arahy.KXLH0Y	5.94496	2.01166	2.31671	1.70557	ZH16_S1	0.610307	--	Calmodulin-binding protein
arahy.8F9XT7	37.5506	2.3983	2.63425	2.12173	ZH16_S1	0.929848	--	n=3 Tax=Oryza sativa RepID=Q7XUY4_ORYSJ
arahy.2U4GNC	0.570652	0.144064	0.145804	0	ZH16_S1	0.744497	--	extradiol ring-cleavage dioxygenase-like [Glycine max]
arahy.WSF6G4	2.03221	0	0	0	ZH16_S1	1	--	Protein kinase superfamily protein
arahy.2U7QKV	35.2615	13.7303	11.8925	8.81848	ZH16_S1	0.610616	--	Myosin heavy chain-related protein
arahy.ELD72T	0.320494	0.0592005	0	0	ZH16_S1	0.815284	--	Late embryogenesis abundant (LEA) hydroxyproline-rich glycoprotein family
arahy.TIY3DH	54.8583	8.69707	4.72156	6.02014	ZH16_S1	0.841463	--	3-ketoacyl-CoA synthase 4
arahy.TX3Z3S	5.30447	0.294974	0.0449618	0.0602285	ZH16_S1	0.944391	--	sulfate transporter 3
arahy.4AY3MY	0.209764	0.0293519	0.052113	0	ZH16_S1	0.751564	--	Sterile alpha motif (SAM) domain-containing protein
arahy.PI69HT	25.2663	10.9027	4.03216	2.81333	ZH16_S1	0.568488	--	dihydrolipoyllysine-residue acetyltransferase component 1 of pyruvate dehydrogenase complex, mitochondrial-like isoform X1 [Glycine max]
arahy.CRN88C	22.8377	4.92796	1.721	1.1992	ZH16_S1	0.784218	--	nucleotide sugar transporter-KT 1
arahy.FZD5QZ	8.80768	1.74188	3.06331	3.01995	ZH16_S1	0.6522	--	Protein kinase superfamily protein
arahy.644STB	69.4373	11.3899	16.25	9.68282	ZH16_S1	0.765976	--	Protein phosphatase 2C family protein
arahy.VH20NJ	14.059	1.85883	1.3676	0.258288	ZH16_S1	0.867783	--	plant invertase/pectin methylesterase inhibitor protein
arahy.SLB9HH	205.828	0.504913	2.39928	1.86824	ZH16_S1	0.988343	--	GDSL-like Lipase/Acylhydrolase superfamily protein
arahy.X1KTL2	46.4418	14.4728	10.5831	6.48385	ZH16_S1	0.688367	--	uncharacterized protein At1g04910-like [Glycine max]
arahy.SJ1Q20	1.59129	0.441137	0.40795	0.154567	ZH16_S1	0.72278	--	Octicosapeptide/Phox/Bem1p family protein
Novel03137	76.3135	0.878906	1.32235	0.963096	ZH16_S1	0.982672	--	--
arahy.Y1CLBV	6.26634	2.55128	0.383568	0.935063	ZH16_S1	0.592859	--	2-oxoglutarate dehydrogenase, E1 component
arahy.V89RV5	152.403	8.9939	3.07456	3.02994	ZH16_S1	0.940986	--	Gibberellin-regulated family protein
arahy.WJIQ4A	0.285782	0.0217584	0.0272568	0	ZH16_S1	0.904624	--	Cytochrome P450 superfamily protein
arahy.LKGH4A	1.78494	0.482383	0.212781	0.0899156	ZH16_S1	0.729748	--	aldo/keto reductase family oxidoreductase
arahy.01T93A	20.9001	0.963672	0.0948479	0	ZH16_S1	0.953891	--	uncharacterized protein LOC100820059 isoform X2 [Glycine max]
arahy.ZRKH1E	24.0025	5.34564	1.93934	0.727086	ZH16_S1	0.777288	--	protein LONGIFOLIA 2-like isoform X2 [Glycine max]
arahy.7SZ544	28.4344	0.344515	0.0225318	0.304462	ZH16_S1	0.987884	--	DUF1997 family protein
arahy.X1MFIF	45.8518	12.0072	4.66992	1.85752	ZH16_S1	0.738131	--	Cell wall protein EXP2 n=1 Tax=Mirabilis jalapa RepID=Q84L40_MIRJA
arahy.XX9FKE	4.55178	0.0865539	0.0201057	0.0347724	ZH16_S1	0.980985	--	O-methyltransferase family protein
arahy.VEJ5PA	7.35628	2.54144	0	0.196394	ZH16_S1	0.654521	--	alpha/beta-Hydrolases superfamily protein
arahy.BRV8TD	0.618044	0	0.0178691	0.0497336	ZH16_S1	0.919531	--	type I inositol 1,4,5-trisphosphate 5-phosphatase CVP2-like [Glycine max]
arahy.UPL4LC	23.356	1.6972	3.47377	1.31811	ZH16_S1	0.851268	--	Defensin MtDef4.6
arahy.M3N3P9	6.51085	2.52647	2.43537	2.62091	ZH16_S1	0.597455	--	Para-aminobenzoic acid synthetase, putative n=2 Tax=Plasmodium chabaudi RepID=Q4XW80_PLACH
arahy.LTG2DU	0.876192	0.0621448	0.169841	0.164952	ZH16_S1	0.80616	--	plant/mmn10-180 protein
arahy.M25UX0	18.3358	8.85594	0.667627	5.54938	ZH16_S1	0.517013	--	transmembrane protein, putative
arahy.EJN9A6	0.112852	0	0	0	ZH16_S1	1	--	dentin sialophosphoprotein-like isoform X2 [Glycine max]
arahy.ZR1PS1	255.729	56.1412	23.0935	15.1985	ZH16_S1	0.780466	--	mitochondrial phosphate carrier protein 3, mitochondrial-like [Glycine max]
arahy.J6C6I8	0.546941	0.223317	0	0	ZH16_S1	0.591698	--	Oxysterol-binding family protein
arahy.924ZJS	12.5012	1.95381	2.53377	1.07312	ZH16_S1	0.797318	--	Zinc finger (C3HC4-type RING finger) family protein
arahy.Z4GUSD	1.54845	0.120921	0.761783	0.557456	ZH16_S1	0.508035	--	senescence-associated protein, putative
arahy.9RJM5Z	8.46541	3.59709	2.13106	2.07043	ZH16_S1	0.575084	--	F-box protein At2g27310-like isoform X1 [Glycine max]
arahy.MD79KS	0.183493	0.0332581	0	0	ZH16_S1	0.81875	--	disease-resistance response protein
arahy.52F34X	0.78602	0.121416	0	0.0462609	ZH16_S1	0.84553	--	serine carboxypeptidase-like 9
arahy.5JIN69	21.6053	0.214983	0.608309	1.39184	ZH16_S1	0.935579	--	unknown protein
arahy.KV8E85	0.846444	0.313647	0.0307694	0	ZH16_S1	0.629453	--	methyltransferase type 11
arahy.AS3ULH	1.3864	0.245752	0	0	ZH16_S1	0.822741	--	NC domain-containing protein-related
arahy.D1NLS5	1.57589	0	0	0	ZH16_S1	1	--	aldo/keto reductase family oxidoreductase
arahy.NF83JW	10.9874	1.37175	0.369165	0.175194	ZH16_S1	0.875153	--	uncharacterized protein LOC100800595 isoform X4 [Glycine max]
arahy.N64Q2X	16.8678	8.41024	4.10731	4.32473	ZH16_S1	0.501402	--	uncharacterized protein LOC100791428 [Glycine max]
arahy.0X9YMY	16.9447	0.677178	2.63916	0	ZH16_S1	0.844249	--	NADH dehydrogenase subunit 7, putative
arahy.Q8Q4RG	2.91431	0.907401	0.966924	0.814093	ZH16_S1	0.668215	--	unknown protein
arahy.8KGI2U	3.55266	0	0.0685981	0.0596942	ZH16_S1	0.980691	--	unknown protein
arahy.WQZ5HT	0.347995	0	0	0	ZH16_S1	1	--	short-chain dehydrogenase-reductase B
arahy.CK3BIN	0.350951	0	0	0	ZH16_S1	1	--	uncharacterized protein At1g04910-like isoform X1 [Glycine max]
arahy.6Q00VM	3.3761	0	0.463798	0	ZH16_S1	0.862623	--	uncharacterized protein At3g17950-like isoform X2 [Glycine max]
arahy.P4LK2T	38.2702	4.47648	4.90713	1.43522	ZH16_S1	0.871777	--	tryptophan aminotransferase related 2
arahy.CW6KKD	27.4256	7.81221	12.9817	10.7073	ZH16_S1	0.526658	--	Unknown protein
arahy.RB6D27	2.03354	0.0301357	0.075502	0	ZH16_S1	0.962872	--	Protein of unknown function, DUF642
arahy.E0TNI0	1.8358	0.894508	0.590335	0.35872	ZH16_S1	0.512741	--	Heavy metal transport/detoxification superfamily protein
arahy.G51199	14.5273	3.41958	4.55913	3.84386	ZH16_S1	0.686168	--	probable xyloglucan glycosyltransferase 12-like [Glycine max]
arahy.1B8730	12.1202	4.07886	2.61395	2.61015	ZH16_S1	0.663465	--	uncharacterized protein LOC100779951 isoform X1 [Glycine max]
arahy.PB946F	0.24589	0	0	0	ZH16_S1	1	--	epoxide hydrolase 4-like [Glycine max]
arahy.J4S4CL	13.845	2.54446	6.63749	4.72285	ZH16_S1	0.520586	--	Unknown protein
arahy.M8MQLJ	22.6546	4.23763	2.56986	1.61559	ZH16_S1	0.812946	--	ATP binding microtubule motor family protein
arahy.M6T21B	2.35252	0.28295	0.513373	0.335907	ZH16_S1	0.781777	--	receptor-like protein kinase 4
arahy.PPEG78	17.9954	7.75141	7.05876	2.84299	ZH16_S1	0.569257	--	Riboflavin synthase, alpha subunit n=2 Tax=Chloroflexus RepID=A9WFQ9_CHLAA
Novel03501	324.962	37.8766	31.1467	24.2868	ZH16_S1	0.883443	--	--
arahy.PB3V0K	0.635133	0.076559	0.0244294	0	ZH16_S1	0.87946	--	mitochondrial outer membrane protein porin 1-like [Glycine max]
arahy.V42Y99	0.298308	0	0	0	ZH16_S1	1	--	anthocyanin 5-aromatic acyltransferase-like [Glycine max]
arahy.FY0VUL	0.251454	0.114892	0.0307787	0.015691	ZH16_S1	0.543088	--	subtilisin-like serine protease 2
arahy.THM2IN	4.24869	0.487896	0.202121	0.0508118	ZH16_S1	0.885165	--	F-box/RNI-like superfamily protein
arahy.411K7N	7.45555	0.229302	2.82817	1.41178	ZH16_S1	0.620662	--	Mechanosensitive ion channel family protein
arahy.X6BMED	1.2007	0	0	0.0644849	ZH16_S1	0.946294	--	Late embryogenesis abundant (LEA) hydroxyproline-rich glycoprotein family
arahy.4K0AMI	0.969047	0.419504	0.345237	0.2015	ZH16_S1	0.567096	--	F-box/RNI-like superfamily protein
arahy.C5GSRL	1.03061	0	0	0	ZH16_S1	1	--	hypothetical protein
arahy.Q6N5X0	9.77045	2.20408	4.61591	3.35811	ZH16_S1	0.527564	--	Protein kinase superfamily protein
arahy.GXB52G	65.1162	30.8313	18.1124	9.80806	ZH16_S1	0.52652	--	V-type proton ATPase subunit E-like isoform X1 [Glycine max]
arahy.3ELH3Y	0.484874	0	0	0	ZH16_S1	1	--	Pyridoxal phosphate (PLP)-dependent transferases superfamily protein n=1 Tax=Theobroma cacao RepID=UPI00042B3A8C
arahy.VE75EM	0.561968	0.27005	0.190227	0.131968	ZH16_S1	0.519457	--	Sec14p-like phosphatidylinositol transfer family protein
arahy.47SLDE	32.0797	3.69775	8.07916	6.14609	ZH16_S1	0.748154	--	putative indole-3-acetic acid-amido synthetase GH3.9
arahy.J8HGUJ	8.55925	3.57958	1.91808	1.6233	ZH16_S1	0.581788	--	Protein kinase superfamily protein
arahy.FXAX6R	44.2469	7.1715	2.91785	1.70396	ZH16_S1	0.837921	--	pyruvate dehydrogenase E1 component, alpha subunit
arahy.PW04T0	29.8674	0	0.618933	0.17947	ZH16_S1	0.979277	--	SAUR-like auxin-responsive protein family
arahy.YJK833	15.479	4.01407	3.51908	3.64304	ZH16_S1	0.740677	--	DOMON domain-containing protein / dopamine beta-monooxygenase N-terminal domain-containing protein
arahy.YX67LP	31.8352	8.45742	3.06451	2.951	ZH16_S1	0.734337	--	protein PLANT CADMIUM RESISTANCE 2-like [Glycine max]
arahy.S79VX1	6.36103	0.535913	1.41679	1.22961	ZH16_S1	0.77727	--	senescence-associated protein
arahy.XDAI2B	4.90915	0.0106637	0.107469	0.0783936	ZH16_S1	0.978109	--	calcium-transporting ATPase 8, plasma membrane-type protein
arahy.D0UR3R	4.33247	0.294361	0.263498	0.221309	ZH16_S1	0.932057	--	diacylglycerol kinase 5
arahy.4U54KW	0.485662	0.0230484	0	0	ZH16_S1	0.952542	--	late embryogenesis abundant protein
arahy.56TCJ2	44.8894	0.184145	0.052416	0.0906522	ZH16_S1	0.995898	--	plant invertase/pectin methylesterase inhibitor protein
arahy.QY0ZSY	0.138911	0	0	0	ZH16_S1	1	--	Unknown protein
arahy.8E6DTP	0.19098	0	0	0	ZH16_S1	1	--	Unknown protein
arahy.1H4V42	0.214419	0	0	0	ZH16_S1	1	--	uncharacterized protein LOC102669150 [Glycine max]
arahy.NUJ70J	0.257068	0	0	0	ZH16_S1	1	--	Unknown protein
arahy.XL2WLX	0.222137	0	0	0	ZH16_S1	1	--	type I inositol 1,4,5-trisphosphate 5-phosphatase CVP2-like [Glycine max]
arahy.52TI3X	38.8375	3.92166	1.62291	0.707983	ZH16_S1	0.899024	--	L-ascorbate oxidase homolog [Glycine max]
arahy.5QQS73	0.107135	0	0	0	ZH16_S1	1	--	Unknown protein
arahy.648X0I	0.24403	0.107986	0.0922133	0	ZH16_S1	0.557488	--	MATE efflux family protein
arahy.JE8UNX	0.127525	0	0	0	ZH16_S1	1	--	Heavy metal transport/detoxification superfamily protein
Novel04367	0.448378	0	0	0	ZH16_S1	1	--	--
arahy.R9W6MW	1.14806	0	0	0	ZH16_S1	1	--	protein YLS9-like [Glycine max]
arahy.QGQ9QD	5.0635	0.423534	2.38498	0.708448	ZH16_S1	0.528986	--	senescence-associated protein
arahy.BHHB36	8.87775	0.455084	0.274324	0.514569	ZH16_S1	0.942038	--	LURP-one-like protein
arahy.ZDHF3I	20.4505	2.92299	0.645876	0.113115	ZH16_S1	0.85707	--	fatty acid desaturase 8
arahy.TIB4QE	0.167867	0	0	0	ZH16_S1	1	--	ATP synthase subunit beta n=1 Tax=Medicago truncatula RepID=G7LEH3_MEDTR
arahy.PYC4V3	103.194	34.6488	47.3075	41.1394	ZH16_S1	0.54157	--	Bax inhibitor-1 family protein
arahy.WK29PC	45.6608	0	0.0880342	0.12902	ZH16_S1	0.997174	--	xyloglucan endotransglucosylase/hydrolase 15
arahy.8C0M2R	0.278444	0	0	0	ZH16_S1	1	--	Uncharacterised protein family (UPF0497)
arahy.YV33P0	471.477	141.714	152.698	97.1657	ZH16_S1	0.676128	--	cytochrome c oxidase-related
arahy.K7MVK9	31.2699	13.915	7.45036	6.25591	ZH16_S1	0.555003	--	Clathrin adaptor complexes medium subunit family protein
arahy.0D01QN	47.1995	9.00447	2.66152	1.54796	ZH16_S1	0.809226	--	NADPH:quinone oxidoreductase
arahy.IWFQ27	32.0386	3.71114	2.14092	1.81325	ZH16_S1	0.884166	--	uncharacterized protein DDB_G0271670-like [Glycine max]
arahy.GU9EZ6	0.543039	0	0	0	ZH16_S1	1	--	GDSL-like Lipase/Acylhydrolase superfamily protein
arahy.98CSRD	48.0129	0.995376	3.39865	5.52511	ZH16_S1	0.884924	--	plasma-membrane associated cation-binding protein 1
arahy.58XCKB	45.2669	1.50072	0.595459	0.541368	ZH16_S1	0.966847	--	ATP binding protein n=3 Tax=Zea mays RepID=B6SKI4_MAIZE
arahy.5MVT7T	3.39676	0	0	0	ZH16_S1	1	--	annexin 5
arahy.03ZACY	0.195792	0	0	0	ZH16_S1	1	--	uncharacterized protein LOC100820019 isoform X4 [Glycine max]
arahy.2R7T4K	6.85961	2.59817	1.42298	0.681919	ZH16_S1	0.621237	--	GTP-binding protein engA n=1 Tax=Medicago truncatula RepID=G7IED3_MEDTR
arahy.LRUD7W	4.72403	0	0	0	ZH16_S1	1	--	Late embryogenesis abundant protein (LEA) family protein
arahy.5IN5H0	0.371268	0.110256	0.105245	0.0446222	ZH16_S1	0.70303	--	ATP binding microtubule motor family protein
Novel03294	3.21365	0.104233	0.422416	0.273956	ZH16_S1	0.868556	--	--
arahy.7X34R9	0.129072	0	0	0	ZH16_S1	1	--	metacaspase 3
arahy.HP6SUR	5.79347	0.531881	0	0	ZH16_S1	0.908193	--	trafficking protein particle complex subunit-like protein
arahy.8K5I59	0.435266	0	0	0	ZH16_S1	1	--	protein FANTASTIC FOUR 3 [Glycine max]
arahy.U5205M	19.4099	6.45835	7.69742	4.06086	ZH16_S1	0.603429	--	transmembrane protein, putative
arahy.9V8R16	0.500234	0	0.17721	0.24898	ZH16_S1	0.502273	--	ankyrin repeat-containing protein [Glycine max]
Novel00221	55.5936	8.57039	9.17785	5.54783	ZH16_S1	0.834912	--	--
arahy.X8ET43	0.940758	0.268524	0.179838	0.0633481	ZH16_S1	0.714566	--	LRR and NB-ARC domain disease resistance protein
arahy.H6523D	0.213238	0.0583836	0.0533522	0	ZH16_S1	0.726205	--	DUF21 domain plant protein
arahy.KPK81W	237.61	13.8755	2.34833	1.22327	ZH16_S1	0.941604	--	L-ascorbate oxidase homolog [Glycine max]
arahy.SHW8SI	26.3601	8.01509	5.92884	3.89845	ZH16_S1	0.695939	--	glucose-induced degradation protein 4 homolog [Glycine max]
arahy.E06EVW	20.7656	5.86401	3.80766	3.87754	ZH16_S1	0.717609	--	RNA-binding (RRM/RBD/RNP motifs) family protein
arahy.GW47QT	0.32518	0.0559221	0.0380401	0.0328227	ZH16_S1	0.828027	--	LRR receptor-like kinase family protein
arahy.24ECRJ	48.3039	13.4021	5.02558	2.46251	ZH16_S1	0.722547	--	alkaline/neutral invertase
arahy.JCH4FE	69.8224	20.3015	14.79	17.1318	ZH16_S1	0.709241	--	unknown protein
arahy.YJZ5EZ	38.3089	13.9847	15.8238	14.2194	ZH16_S1	0.586942	--	RING/FYVE/PHD zinc finger superfamily protein
arahy.DWWZ6G	109.578	13.1865	10.7187	11.7826	ZH16_S1	0.879661	--	phosphoethanolamine N-methyltransferase
arahy.W8IC6S	4.07679	0	0	0.0115204	ZH16_S1	0.997174	--	carbonic anhydrase 1
arahy.FM2NH1	0.795686	0	0.300198	0	ZH16_S1	0.622718	--	senescence-associated protein, putative
arahy.LE2REB	15.7217	5.3281	0	0.0545642	ZH16_S1	0.661099	--	Pollen Ole e 1 allergen and extensin family protein
arahy.XT6BWY	14.2339	3.29519	6.32644	4.64548	ZH16_S1	0.555538	--	receptor-like kinase 1
arahy.023UF6	24.622	5.38383	10.6148	8.79449	ZH16_S1	0.56889	--	ADP-ribosylation factor GTPase-activating protein AGD10
arahy.NIU36G	0.818069	0.195066	0.062244	0.0801385	ZH16_S1	0.761553	--	Metal transport family protein n=1 Tax=Populus trichocarpa RepID=B9HI40_POPTR
arahy.V82W90	2.22354	0	0	0	ZH16_S1	1	--	Protein kinase superfamily protein
arahy.M35B2F	9.65128	1.09878	2.12153	3.19855	ZH16_S1	0.668588	--	probable polygalacturonase-like [Glycine max]
arahy.IM1JRZ	0.358096	0	0.0290818	0	ZH16_S1	0.918788	--	putative indole-3-acetic acid-amido synthetase GH3.9
arahy.L8F1YU	0.250457	0.0398602	0.0900401	0.0764216	ZH16_S1	0.640496	--	UDP-Glycosyltransferase superfamily protein
arahy.F7BNA1	38.4437	5.90613	5.9125	1.36072	ZH16_S1	0.846204	--	Octicosapeptide/Phox/Bem1p family protein
arahy.MTEL0D	3.77616	0.584981	1.26282	1.53052	ZH16_S1	0.594688	--	protein IQ-DOMAIN 14-like [Glycine max]
arahy.PLG903	0.28847	0	0	0.0152766	ZH16_S1	0.947043	--	nodulation-signaling pathway 1 protein-like [Glycine max]
arahy.D1F2PF	10.381	0	0	0	ZH16_S1	1	--	probable pectinesterase/pectinesterase inhibitor 21-like [Glycine max]
arahy.0Z8YFF	16.3595	2.67946	1.58327	0.880082	ZH16_S1	0.836214	--	Protein kinase superfamily protein
arahy.ZWU3E4	4.43919	0	0	0	ZH16_S1	1	--	SAUR-like auxin-responsive protein family
arahy.38CFQ6	25.3032	9.2959	5.31175	4.61307	ZH16_S1	0.632619	--	villin-1-like isoform X2 [Glycine max]
arahy.Z6E1QU	15.6304	1.57064	1.49438	0.582785	ZH16_S1	0.899514	--	calcium-transporting ATPase 2, plasma membrane-type protein
arahy.572HXX	57.8761	11.7489	7.96297	6.99923	ZH16_S1	0.796999	--	cAMP-regulated phosphoprotein 19-related protein
arahy.JGYC2J	222.905	10.5067	8.32849	3.79859	ZH16_S1	0.952865	--	Glycerophosphodiester phosphodiesterase GDE1 n=2 Tax=Triticeae RepID=M8BLH1_AEGTA
arahy.1WY19I	0.705605	0.0545827	0	0	ZH16_S1	0.922644	--	Major facilitator superfamily protein
arahy.LM1Q4V	6.65345	3.14961	1.69121	2.56872	ZH16_S1	0.526621	--	UDP-glycosyltransferase 74 F1
arahy.83QM18	0.901768	0.131595	0	0.0251764	ZH16_S1	0.85407	--	apyrase 2
Novel00958	111.27	10.5688	9.36371	7.17444	ZH16_S1	0.905017	--	--
arahy.V7YFUL	2.54993	0	0.06916	0	ZH16_S1	0.972878	--	DUF4228 domain protein
arahy.PH270E	1.26639	0.0999643	0	0	ZH16_S1	0.921064	--	HVA22-like protein F
arahy.3H39ZY	4.91655	1.7081	0.227422	0.18328	ZH16_S1	0.652582	--	Transmembrane amino acid transporter family protein
Novel04574	7.34803	0	0	0	ZH16_S1	1	--	--
arahy.2WN1K3	8.23903	3.13311	1.42791	1.71094	ZH16_S1	0.619723	--	Copper amine oxidase family protein
Novel03107	28.4108	3.72953	6.92488	3.2183	ZH16_S1	0.756259	--	--
arahy.T6LAIA	5.49695	0	2.53787	1.59079	ZH16_S1	0.538314	--	GDSL-like Lipase/Acylhydrolase superfamily protein
arahy.PA59SC	8.95858	4.41976	1.19808	0.852171	ZH16_S1	0.506645	--	Core-2/I-branching beta-1,6-N-acetylglucosaminyltransferase family protein
arahy.7K2YJD	4.8195	0.132841	0.0635299	0.0638103	ZH16_S1	0.972437	--	alternative oxidase 2
arahy.U2GM3Q	0.746459	0.113629	0.322251	0.0255263	ZH16_S1	0.568293	--	uncharacterized protein LOC100782361 isoform X5 [Glycine max]
arahy.7RX9RF	22.6533	0.66967	1.53438	1.1576	ZH16_S1	0.932267	--	protein FAF-like, chloroplastic-like [Glycine max]
arahy.MT35IL	20.8835	8.72277	6.15132	6.43738	ZH16_S1	0.582314	--	vacuolar cation/proton exchanger 3
arahy.8771PM	13.4484	5.49048	4.70884	2.91363	ZH16_S1	0.591737	--	golgin candidate 1
arahy.Y6M3VX	16.8869	7.29931	2.84853	2.15668	ZH16_S1	0.567753	--	cytochrome B561-1
arahy.MWN8UA	3.67647	1.76081	0.610603	0.223579	ZH16_S1	0.521058	--	Vacuolar iron transporter (VIT) family protein
arahy.RR78P6	0.425898	0.0353409	0.0372252	0.146	ZH16_S1	0.657195	--	senescence-associated protein
arahy.8I98WG	1.48823	0	0	0	ZH16_S1	1	--	Calmodulin binding protein-like
arahy.V96LGR	1.89972	0.651401	0.429073	0.200361	ZH16_S1	0.657108	--	calcium-transporting ATPase, putative
arahy.B85EDH	40.5022	0.527356	3.35441	2.43757	ZH16_S1	0.917179	--	GDSL-like Lipase/Acylhydrolase superfamily protein
arahy.1YSK8M	9.81728	0.108507	0.0488246	0.12557	ZH16_S1	0.987209	--	beta-galactosidase 8
arahy.R57IYC	12.7322	0.471037	0	0	ZH16_S1	0.963004	--	hypothetical protein
arahy.VZW0IR	181.939	82.5647	79.3118	45.7553	ZH16_S1	0.546195	--	NADH-ubiquinone oxidoreductase 51 kDa subunit
arahy.D79IFD	2.80163	0.131941	0.0706917	0.0416708	ZH16_S1	0.952906	--	annexin 4
arahy.FNV3YB	4.98459	0.824114	2.44214	0.724821	ZH16_S1	0.510062	--	CYCLIN D1
arahy.9C6MVE	15.4199	6.88056	4.43811	2.40453	ZH16_S1	0.553786	--	mitochondrial uncoupling protein 1-like [Glycine max]
arahy.161SS5	4.38998	1.48964	1.15561	0.584317	ZH16_S1	0.660672	--	uncharacterized protein LOC100778990 isoform X5 [Glycine max]
arahy.KFLF6K	0.228679	0	0	0	ZH16_S1	1	--	high mobility group B protein 15-like isoform X7 [Glycine max]
arahy.LL1TW1	2.53601	0	0.16225	0	ZH16_S1	0.936022	--	uncharacterized protein LOC102668673 isoform X2 [Glycine max]
arahy.D0M6LR	1.02357	0	0.0708712	0.0219432	ZH16_S1	0.930761	--	short-chain dehydrogenase-reductase B
arahy.1P1KVG	0.642747	0	0.0452855	0.274452	ZH16_S1	0.573001	--	ankyrin repeat-containing protein [Glycine max]
arahy.CQAX74	9.34169	0.703874	1.04713	0.472078	ZH16_S1	0.887908	--	Actin cross-linking protein
Novel02535	8.79459	1.84121	0.904526	0.489622	ZH16_S1	0.790643	--	--
arahy.J1HUHD	0.868274	0.0468404	0	0	ZH16_S1	0.946053	--	17.6 kDa class II heat shock protein
arahy.ZDR5QN	13.6883	6.16315	3.81197	4.50537	ZH16_S1	0.54975	--	uncharacterized protein LOC100805767 isoform X5 [Glycine max]
arahy.15YPMB	5.57764	0.278231	2.11084	1.02322	ZH16_S1	0.621553	--	senescence-associated protein
arahy.3VLA0M	9.81741	2.85795	1.34829	1.04956	ZH16_S1	0.70889	--	U-box domain-containing protein 6-like [Glycine max]
arahy.BD3621	31.2739	4.48817	2.96058	1.41571	ZH16_S1	0.856488	--	ATP binding microtubule motor family protein
arahy.31X1J3	19.0985	6.14564	6.23221	2.35889	ZH16_S1	0.673681	--	unknown protein
Novel00642	23.0322	0.101774	0.496281	0.132197	ZH16_S1	0.978453	--	--
arahy.TB2NW7	9.90723	4.33754	2.28133	1.77593	ZH16_S1	0.562184	--	probable apyrase 7-like isoform X1 [Glycine max]
arahy.FEY4ZS	43.4426	6.43809	10.5771	8.19319	ZH16_S1	0.756527	--	GHMP kinase family protein
arahy.S6WBKZ	0.372309	0.109551	0.0214943	0	ZH16_S1	0.705752	--	uncharacterized protein LOC100795873 isoform X1 [Glycine max]
arahy.AWWZ2A	0.280257	0	0	0	ZH16_S1	1	--	PLANT CADMIUM RESISTANCE 2
arahy.RBX6I8	83.7339	28.4316	34.4194	23.7559	ZH16_S1	0.588943	--	probable galacturonosyltransferase-like 7-like [Glycine max]
arahy.VDI3WX	3.83226	0.022144	0.0378191	0	ZH16_S1	0.990131	--	IAA-amino acid hydrolase ILR1-like 4-like [Glycine max]
arahy.RHZ4EV	2.57478	0.492794	0.114472	0	ZH16_S1	0.808608	--	Unknown protein
arahy.40Z2MJ	20.2166	9.5429	5.12249	4.77722	ZH16_S1	0.527967	--	Sterile alpha motif (SAM) domain-containing protein
arahy.U00TZP	95.9892	27.1106	12.1869	9.51261	ZH16_S1	0.717566	--	Dihydrolipoyllysine-residue succinyltransferase component of 2-oxoglutarate dehydrogenase complex n=3 Tax=Papilionoideae RepID=G7K3L9_MEDTR
arahy.V47NKJ	0.192342	0	0	0	ZH16_S1	1	--	transmembrane protein, putative
arahy.Q4AMIE	146.84	11.1517	14.8714	7.07018	ZH16_S1	0.898724	--	Unknown protein
arahy.1G2EUX	4.60976	1.33843	0.433729	0.548348	ZH16_S1	0.709652	--	Cytochrome P450 superfamily protein
arahy.K2UT7U	1.67614	0.295088	0.0672732	0.0667787	ZH16_S1	0.823948	--	uncharacterized protein LOC100780115 isoform X1 [Glycine max]
arahy.W8TIS9	45.1056	1.31532	18.2562	6.74255	ZH16_S1	0.595257	--	Glutaredoxin family protein
arahy.NGU5W2	0.17328	0.08405	0.0268197	0.03453	ZH16_S1	0.514948	--	BAG family molecular chaperone regulator 6-like isoform X2 [Glycine max]
arahy.U63X74	0.594455	0.143234	0.0224012	0.0647365	ZH16_S1	0.75905	--	zinc finger protein CONSTANS-LIKE 5-like [Glycine max]
arahy.KH6BJZ	32.0859	0.0206904	0	0.0756018	ZH16_S1	0.997644	--	Core-2/I-branching beta-1,6-N-acetylglucosaminyltransferase family protein
arahy.AANK3P	0.41467	0.0316629	0.0686651	0.0202208	ZH16_S1	0.83441	--	receptor-like kinase 1
arahy.TA68GI	0.480495	0.0478532	0.0243795	0.107479	ZH16_S1	0.776316	--	glutamate receptor 2.5
arahy.9QC5ZN	0.247038	0	0	0	ZH16_S1	1	--	receptor-like serine/threonine kinase 2
arahy.S7XZ9Q	98.8193	1.53719	14.4338	11.3198	ZH16_S1	0.853937	--	GDSL-like Lipase/Acylhydrolase superfamily protein
arahy.2EI1KH	2.2355	0.149519	0.187303	0	ZH16_S1	0.916214	--	zinc finger A20 and AN1 domain stress-associated protein
arahy.14A3MN	8.3609	4.0995	3.36835	3.9734	ZH16_S1	0.509682	--	uncharacterized protein LOC100792961 isoform X7 [Glycine max]
arahy.I0I8XZ	11.1779	1.45836	0.249311	0.104245	ZH16_S1	0.869532	--	Thioredoxin superfamily protein
arahy.0R479N	10.8373	1.43011	1.62017	0.96735	ZH16_S1	0.8505	--	photosystem II protein D1 [Glycine max]
arahy.SHV8K3	0.158766	0	0	0	ZH16_S1	1	--	mitochondrial processing peptidase alpha subunit
arahy.6E3YUI	29.3118	0.353546	0.0624989	0.0655603	ZH16_S1	0.987938	--	probable pectinesterase/pectinesterase inhibitor 41-like [Glycine max]
arahy.LT4L2L	12.5659	0.118098	2.49219	1.81933	ZH16_S1	0.80167	--	protein CHUP1, chloroplastic-like isoform X2 [Glycine max]
arahy.KHE2M7	0.535653	0.0346068	0.029552	0.0511095	ZH16_S1	0.904585	--	NADH-ubiquinone oxidoreductase chain n=309 Tax=Magnoliophyta RepID=G7IB69_MEDTR
arahy.H52F03	85.4017	29.3156	22.4117	11.3896	ZH16_S1	0.656733	--	Unknown protein
arahy.7VFA6D	2.87939	0.623699	0.404953	0.426139	ZH16_S1	0.783392	--	wall-associated receptor kinase-like 15-like [Glycine max]
arahy.FXV2QT	0.563168	0	0	0	ZH16_S1	1	--	Orf100 n=2 Tax=commelinids RepID=G9HNV1_PHODC
arahy.FM4779	0.65503	0.0646652	0	0	ZH16_S1	0.901279	--	spermidine hydroxycinnamoyl transferase-like [Glycine max]
arahy.DM14FR	22.8205	3.60848	1.59986	1.25828	ZH16_S1	0.841875	--	protein LONGIFOLIA 2-like isoform X2 [Glycine max]
arahy.7CMH8M	7.17275	0.852696	0.471126	0.335205	ZH16_S1	0.88112	--	F-box family protein
arahy.20BG1F	4.57235	0	0	0	ZH16_S1	1	--	probable calcium-binding protein CML25-like [Glycine max]
arahy.I5TYVY	0.535063	0.185119	0	0.203526	ZH16_S1	0.619622	--	Unknown protein
arahy.H6S6U7	3.7858	0.660233	0.188658	0.103765	ZH16_S1	0.825603	--	Water-selective transport intrinsic membrane protein 1 n=1 Tax=Lotus japonicus RepID=Q9LKJ6_LOTJA
arahy.SZ6KWI	1.61526	0.208963	0.362409	0.120618	ZH16_S1	0.775633	--	probable leucine-rich repeat receptor-like protein kinase At1g35710-like [Glycine max]
arahy.E93Z3L	0.451433	0	0	0	ZH16_S1	1	--	ammonium transporter 1
arahy.19SFKA	18.7189	3.73831	0.117877	0.0189397	ZH16_S1	0.800292	--	adenylyl cyclase-associated protein
arahy.1NRA6C	0.896456	0.180449	0.0109842	0	ZH16_S1	0.798709	--	receptor-like serine/threonine kinase 2
arahy.KK3R3A	18.34	0.647624	1.93196	1.86143	ZH16_S1	0.894659	--	Protein kinase superfamily protein
arahy.BYLA1M	1.03699	0.25209	0.0675329	0.13292	ZH16_S1	0.756901	--	Unknown protein
arahy.069QKB	3.91906	0.138193	0.0310341	0.569494	ZH16_S1	0.854686	--	Lipin family protein
arahy.TTE3SB	17.8697	8.26097	4.18711	2.79749	ZH16_S1	0.537711	--	Dormancy/auxin associated family protein
arahy.IM67PL	44.0248	5.71405	2.73185	3.33398	ZH16_S1	0.870208	--	uncharacterized protein At3g49720-like isoform X2 [Glycine max]
arahy.63YKCR	6.33908	0.0363318	0.203093	0.0399444	ZH16_S1	0.967962	--	glutathione S-transferase, amine-terminal domain protein
arahy.AI3NZF	0.142166	0	0	0	ZH16_S1	1	--	callose synthase 1
arahy.ILQ5AU	4.20144	0.659747	1.06514	1.89184	ZH16_S1	0.549717	--	RWP-RK domain-containing protein
arahy.S9M61F	1.37451	0.0496143	0.239625	0.0762591	ZH16_S1	0.825666	--	Disease resistance protein (TIR-NBS-LRR class) family
arahy.VR06A8	1.06639	0.392212	0	0	ZH16_S1	0.632208	--	cyclic nucleotide-gated ion channel-like protein
arahy.R7ZBMQ	297.289	52.7517	14.2147	7.84714	ZH16_S1	0.822558	--	cytochrome P450 84A1-like [Glycine max]
Novel05097	1.8367	0.294998	0.16905	0.068913	ZH16_S1	0.839387	--	--
arahy.3F0YT4	18.4671	0	0.0200517	0	ZH16_S1	0.998914	--	Pectate lyase family protein
arahy.SMM8KX	8.77237	3.75853	2.22714	1.79426	ZH16_S1	0.571549	--	uncharacterized protein LOC100799892 isoform X3 [Glycine max]
arahy.29C69C	59.3284	9.96277	4.69013	1.90041	ZH16_S1	0.832074	--	Unknown protein
Novel03232	552.262	26.5162	3.26281	0.0584522	ZH16_S1	0.951986	--	--
arahy.YUL6YW	0.10295	0	0.025935	0	ZH16_S1	0.748082	--	chalcone synthase [Glycine max]
arahy.VEA7DZ	0.277814	0	0	0	ZH16_S1	1	--	NAD-dependent malic enzyme 1
arahy.50N8WQ	0.141596	0	0	0	ZH16_S1	1	--	cation/H+ exchanger 18
arahy.NM6PKW	0.808251	0	0.27664	0	ZH16_S1	0.65773	--	endonuclease/exonuclease/phosphatase family protein
arahy.L2FRMW	25.598	0.0299358	0.0152512	0	ZH16_S1	0.998831	--	alpha/beta-Hydrolases superfamily protein
arahy.0GKG8Y	0.756364	0.0887641	0	0	ZH16_S1	0.882644	--	UDP-Glycosyltransferase superfamily protein
arahy.X0GQC6	16.7601	6.98445	2.25743	2.67875	ZH16_S1	0.58327	--	Nucleotide/sugar transporter family protein
arahy.WY06FR	17.3336	8.55815	4.75251	4.26723	ZH16_S1	0.506269	--	polypyrimidine tract-binding protein 1
arahy.Q6VMSA	17.4749	2.38005	3.40496	3.94158	ZH16_S1	0.774443	--	probable carboxylesterase 18-like [Glycine max]
arahy.Q0CVUM	39.777	15.3228	9.49544	6.97672	ZH16_S1	0.614781	--	phosphoenolpyruvate carboxylase 3
arahy.1B2YDL	3.67333	0.0281703	1.26076	0.23899	ZH16_S1	0.65678	--	senescence-associated protein, putative
arahy.8SCZ96	0.884655	0.164261	0.046756	0	ZH16_S1	0.814322	--	gamma-soluble NSF attachment protein
arahy.1K0J2U	0.80866	0	0	0	ZH16_S1	1	--	Unknown protein
arahy.MN8TLX	10.2346	2.48424	2.58269	2.29047	ZH16_S1	0.747653	--	Transmembrane amino acid transporter family protein
arahy.0Y9XYY	62.1244	30.0348	21.481	15.492	ZH16_S1	0.516539	--	ATP-dependent zinc metalloprotease FtsH-like [Glycine max]
arahy.UYU815	2.67406	0.380949	0.427697	0.510341	ZH16_S1	0.809151	--	Pentatricopeptide repeat (PPR) superfamily protein
Novel01150	178.676	5.76274	16.6729	6.06217	ZH16_S1	0.906686	--	--
arahy.1RP5IK	9.9456	3.10043	4.84276	3.2138	ZH16_S1	0.513075	--	Unknown protein
arahy.TQHF91	19.874	0.848971	0.205012	0	ZH16_S1	0.957282	--	Unknown protein
arahy.1S388T	0.254671	0	0	0	ZH16_S1	1	--	UPF0392 protein RCOM_0530710-like [Glycine max]
arahy.P4443F	3.082	0	0	0	ZH16_S1	1	--	L-ascorbate oxidase homolog [Glycine max]
arahy.ES1PUL	2.8373	0.146686	0.123511	0	ZH16_S1	0.948301	--	phospholipase D alpha 1
arahy.5A64T9	123.583	37.1868	24.5122	15.7028	ZH16_S1	0.699095	--	tubulin beta chain 2
arahy.5ID3PX	33.1023	14.4382	5.5476	3.64307	ZH16_S1	0.56383	--	methylthioribose-1-phosphate isomerase
arahy.2RL5LC	0.171798	0	0	0	ZH16_S1	1	--	glucan endo-1,3-beta-glucosidase 8-like [Glycine max]
arahy.15VHUH	1.54185	0.718283	0.585204	0.273473	ZH16_S1	0.534143	--	disease resistance protein
arahy.XM9WCR	0.141833	0	0	0	ZH16_S1	1	--	alpha/beta-hydrolase superfamily protein
arahy.1E2EJ9	0.456589	0	0	0	ZH16_S1	1	--	Unknown protein
arahy.VYLL54	29.7547	2.06021	0.863525	1.59953	ZH16_S1	0.93076	--	Galactosyltransferase family protein
arahy.VHP4C7	14.3909	3.71324	4.91313	2.76943	ZH16_S1	0.658595	--	unknown protein
arahy.BS7E4V	9.3349	4.19608	2.26272	1.60406	ZH16_S1	0.550495	--	probable polygalacturonase-like [Glycine max]
arahy.E5J967	14.0113	5.06266	2.83026	3.02796	ZH16_S1	0.638674	--	Alternative oxidase family protein
arahy.HYA0MS	0.275869	0	0	0	ZH16_S1	1	--	O-methyltransferase family protein
arahy.YQRH3K	14.8284	5.4923	2.82439	2.64933	ZH16_S1	0.629609	--	Protein kinase superfamily protein
Novel02342	74.7505	31.8659	18.7996	11.0662	ZH16_S1	0.573704	--	--
arahy.246EX0	1.88775	0.128087	0.0408715	0.0611328	ZH16_S1	0.932148	--	arabinogalactan peptide 20-like [Glycine max]
arahy.YI7QGP	8.59364	2.8096	3.05648	2.73143	ZH16_S1	0.644332	--	Sphingomyelin synthetase family protein isoform 1 n=1 Tax=Theobroma cacao RepID=UPI00042B6F36
arahy.1ZHN64	194.639	49.5296	23.789	18.1016	ZH16_S1	0.745531	--	Major facilitator superfamily protein
arahy.HC26ZW	0.17339	0	0	0	ZH16_S1	1	--	photosystem I assembly protein Ycf3
arahy.SL8FFE	0.5667	0.279215	0.177633	0.0738995	ZH16_S1	0.507297	--	disease resistance protein (TIR-NBS-LRR class), putative
arahy.YC7CVR	0.190275	0	0.0621246	0	ZH16_S1	0.673501	--	jasmonic acid carboxyl methyltransferase
arahy.Q2QQQQ	110.773	35.0524	24.6106	16.4525	ZH16_S1	0.683567	--	probable mitochondrial-processing peptidase subunit beta-like [Glycine max]
arahy.T2D7K4	68.403	2.42012	30.0654	8.51636	ZH16_S1	0.560466	--	Tar1p n=1 Tax=Medicago truncatula RepID=G7K0E0_MEDTR
arahy.UM2SQV	58.3161	12.3109	5.65804	1.54813	ZH16_S1	0.788894	--	cysteine proteinase1
arahy.D2ALS7	31.524	6.31513	7.29587	5.20112	ZH16_S1	0.768562	--	ATP-binding/protein serine/threonine kinase [Glycine max]
arahy.CWZU13	254.242	10.3987	31.8981	7.76833	ZH16_S1	0.874536	--	Pectate lyase family protein
arahy.TZXT9X	19.2203	8.21301	7.87375	5.02608	ZH16_S1	0.572691	--	BTB/POZ domain-containing protein [Glycine max]
arahy.6VZ6G8	27.9632	8.07717	5.26895	3.713	ZH16_S1	0.71115	--	ATP-binding/protein serine/threonine kinase [Glycine max]
arahy.98PBN3	71.3186	30.7839	22.4736	13.6513	ZH16_S1	0.56836	--	Cytochrome b-c1 complex subunit Rieske, mitochondrial n=2 Tax=Papilionoideae RepID=I3SAX8_LOTJA
arahy.X9KLSS	2.3481	0.38171	0.199161	0.169673	ZH16_S1	0.837439	--	dentin sialophosphoprotein-like [Glycine max]
arahy.C5DY5V	16.9092	6.44434	8.08904	6.17663	ZH16_S1	0.521618	--	Protein kinase superfamily protein
arahy.K09X2E	0.164404	0	0	0	ZH16_S1	1	--	hypothetical protein
arahy.KLZ79N	81.8758	8.63357	13.6435	8.38211	ZH16_S1	0.833364	--	subtilisin-like serine protease 2
arahy.WDLA50	6.62047	0.413442	0.934201	1.14987	ZH16_S1	0.826315	--	glycosyl hydrolase family protein 43
arahy.LPL3F8	26.6208	12.1112	6.38024	5.08836	ZH16_S1	0.545046	--	protein ROOT HAIR DEFECTIVE 3 homolog 1-like [Glycine max]
arahy.GYF88Q	0.505095	0	0.14849	0	ZH16_S1	0.706016	--	GRAM domain-containing protein / ABA-responsive protein-related
arahy.YY3FCR	3.05704	1.3698	0.514769	0.631668	ZH16_S1	0.55192	--	Protein kinase superfamily protein
arahy.H2M7TV	6.07434	0	0	0	ZH16_S1	1	--	transmembrane protein, putative
Novel00427	5.3582	2.50762	1.08339	1.51113	ZH16_S1	0.532003	--	--
arahy.606BFT	308.228	14.25	17.7247	4.42202	ZH16_S1	0.942495	--	Pectate lyase family protein
arahy.K4VSH4	49.2354	17.1479	22.3309	20.2632	ZH16_S1	0.546448	--	F-box family protein
arahy.9S9EKZ	7.78592	0.43266	1.6665	1.60453	ZH16_S1	0.78596	--	plectin-like isoform X3 [Glycine max]
arahy.84DVUA	2.29662	0.836293	0.596795	0.401888	ZH16_S1	0.635859	--	polyamine oxidase 1
arahy.G897EA	5.42799	2.29314	0.896051	0.459184	ZH16_S1	0.577535	--	putative UDP-glucuronate:xylan alpha-glucuronosyltransferase 3-like [Glycine max]
arahy.3P0VVA	40.0657	17.5353	17.9254	15.188	ZH16_S1	0.5526	--	Protein kinase superfamily protein
arahy.H3TIY6	33.2136	7.31196	6.51486	3.28253	ZH16_S1	0.779851	--	probable BOI-related E3 ubiquitin-protein ligase 3-like isoform X2 [Glycine max]
arahy.8Q755P	3.54421	0.901903	0.251405	0.0706653	ZH16_S1	0.745527	--	Protein kinase superfamily protein
arahy.Q5FMS0	104.568	46.7397	37.4223	20.2714	ZH16_S1	0.55302	--	Cytochrome c oxidase, subunit Vib family protein
arahy.39ZYJP	47.8543	17.5776	9.00846	20.602	ZH16_S1	0.569484	--	dehydration-responsive protein RD22
arahy.0G9B1N	0.618743	0	0	0	ZH16_S1	1	--	SAUR-like auxin-responsive protein family
arahy.943YTE	1254.89	434.353	102.849	4.21565	ZH16_S1	0.653873	--	Non-specific lipid-transfer protein, putative
arahy.I3KG3W	1.35504	0.216167	0.0435223	0.0968168	ZH16_S1	0.840472	--	uncharacterized protein LOC100807449 isoform X2 [Glycine max]
arahy.JU0VI1	0.454336	0.0751611	0.0988139	0.137318	ZH16_S1	0.697762	--	Phosphoglycerate mutase family protein
arahy.U1NS8X	11.8044	0.359637	4.88539	1.43042	ZH16_S1	0.586137	--	RING-H2 finger protein 2B
arahy.X65NL3	2.22478	0.311875	0.0521222	0	ZH16_S1	0.859817	--	sieve element occlusion protein
arahy.1B50KW	16.4106	7.00212	6.15025	3.10271	ZH16_S1	0.573317	--	Low temperature and salt responsive protein family
arahy.ES8831	1.96008	0.385537	0	0	ZH16_S1	0.803306	--	Orf124 protein n=3 Tax=Beta RepID=Q9MF37_BETVU
arahy.7UQ7HQ	34.0757	8.60207	3.51057	3.51096	ZH16_S1	0.74756	--	Transmembrane proteins 14C
arahy.ML3LVJ	87.0672	0.480023	0.163877	0	ZH16_S1	0.994487	--	G-protein gamma subunit 2
arahy.DHJ6J2	66.2387	0.564889	0.0751132	0.0624809	ZH16_S1	0.991472	--	BAG family molecular chaperone regulator 3-like [Glycine max]
arahy.FA4IPG	3.36025	0.980381	0.40545	0.213918	ZH16_S1	0.708242	--	downstream target of AGL15-4 protein, putative
arahy.HS5IHJ	54.8125	1.70307	0.879069	0.794127	ZH16_S1	0.968929	--	beta-galactosidase 11
Novel00544	6.22912	1.82341	2.63182	2.03128	ZH16_S1	0.577497	--	--
arahy.T0GB9L	22.942	10.5844	7.65124	6.87019	ZH16_S1	0.538647	--	auxilin-related protein 2-like isoform X2 [Glycine max]
arahy.0KDC5W	556.513	71.0004	110.845	53.7311	ZH16_S1	0.800823	--	glutamine synthetase 1.3
arahy.G02YMJ	3.12301	1.20969	0.775947	0.812024	ZH16_S1	0.612652	--	disease resistance protein (TIR-NBS-LRR class), putative
arahy.2VE3ZY	42.6448	20.8377	12.3855	6.70637	ZH16_S1	0.511365	--	emp24/gp25L/p24 family/GOLD family protein
arahy.5F2NJK	0.786316	0.228113	0.134832	0.0633284	ZH16_S1	0.709897	--	ATP binding microtubule motor family protein
arahy.M14RRE	0.255699	0.0148567	0.075282	0	ZH16_S1	0.705584	--	putative clathrin assembly protein At5g57200-like [Glycine max]
arahy.2P25JP	1.23658	0.114989	0	0.0506586	ZH16_S1	0.907011	--	unknown protein
arahy.PP5TI0	0.274929	0	0	0.0947785	ZH16_S1	0.655262	--	OTU-like cysteine protease family protein
arahy.NV1RRS	15.5129	3.68982	2.60048	1.57493	ZH16_S1	0.762145	--	glucan endo-1,3-beta-glucosidase 14-like [Glycine max]
arahy.ZES89D	8.99798	2.57099	1.85857	1.4119	ZH16_S1	0.71427	--	PPPDE putative thiol peptidase family protein
arahy.Q7N6WS	1.95901	0.174992	0.114902	0.040879	ZH16_S1	0.910673	--	uncharacterized protein LOC100804417 isoform X6 [Glycine max]
arahy.ARQH3Y	0.247184	0	0.10003	0	ZH16_S1	0.595322	--	kunitz trypsin inhibitor 1
arahy.LMZT46	144.585	39.9974	62.4571	37.4333	ZH16_S1	0.568027	--	fructose-bisphosphate aldolase 2
arahy.IH6GFC	0.190596	0.0794636	0	0	ZH16_S1	0.583078	--	Unknown protein
arahy.6BLQ3E	1.77091	0.620573	0	0.203526	ZH16_S1	0.649573	--	Unknown protein
arahy.E988LT	21.7689	9.81781	6.57215	5.39817	ZH16_S1	0.548998	--	GDSL-like Lipase/Acylhydrolase superfamily protein
arahy.P15414	0.256663	0.070256	0	0	ZH16_S1	0.726271	--	BURP domain-containing protein
arahy.68I314	7.83643	3.79952	3.03536	3.02817	ZH16_S1	0.515147	--	exostosin-2-like [Glycine max]
arahy.4XA800	1.32294	0.120883	0.168847	0.0847164	ZH16_S1	0.872369	--	probable disease resistance protein At5g66900-like isoform X1 [Glycine max]
arahy.JH6WNL	24.8862	3.5666	0.332594	0.0392916	ZH16_S1	0.856684	--	magnesium transporter NIPA2-like isoform X1 [Glycine max]
arahy.0EDZ2A	12.2343	0	0	0	ZH16_S1	1	--	unknown protein
arahy.WXF1XT	0.673524	0.0742835	0.0634333	0	ZH16_S1	0.889709	--	NADH-ubiquinone oxidoreductase chain 4 n=2 Tax=Spermatophyta RepID=N0DNX9_PHAAN
arahy.0J3BLQ	0.796645	0	0	0.0309226	ZH16_S1	0.961184	--	nodulin MtN21 /EamA-like transporter family protein
arahy.5R56VN	9.26116	4.61269	4.18066	1.60415	ZH16_S1	0.501931	--	acetyl-CoA carboxylase biotin carboxylase subunit
arahy.5S4N91	13.9345	6.80803	4.26918	2.55488	ZH16_S1	0.511428	--	isoprenylcysteine alpha-carbonyl methylesterase ICME protein
arahy.DXLT9X	11.2142	2.05142	1.50826	1.31966	ZH16_S1	0.817069	--	Protein kinase superfamily protein
arahy.S9URI0	0.300715	0.0440437	0	0	ZH16_S1	0.853537	--	receptor serine/threonine kinase, putative
arahy.7WLH9S	1.06677	0.124676	0.122498	0.269293	ZH16_S1	0.747562	--	uncharacterized protein LOC102669267 [Glycine max]
arahy.T9D4U4	212.596	2.68191	0.916528	0.30023	ZH16_S1	0.987385	--	cAMP-regulated phosphoprotein 19-related protein
arahy.VBRE55	0.257093	0.0560697	0	0	ZH16_S1	0.781909	--	isocitrate dehydrogenase 1
arahy.Y71N98	21.6231	9.26569	7.39018	7.08992	ZH16_S1	0.571492	--	V-type proton ATPase 16 kDa proteolipid subunit-like [Glycine max]
arahy.Q6X8T9	179.422	1.07337	0.246837	0.0736905	ZH16_S1	0.994018	--	probable galacturonosyltransferase-like 1-like [Glycine max]
arahy.KBA53Y	35.2978	3.53559	6.40722	3.38947	ZH16_S1	0.818481	--	biotin carboxyl carrier acetyl-CoA carboxylase
arahy.2HKE0Z	18.0853	4.74529	2.24586	1.71062	ZH16_S1	0.737617	--	probable xyloglucan glycosyltransferase 6-like [Glycine max]
arahy.Z9YLBS	88.1557	11.9706	3.86437	3.16021	ZH16_S1	0.864211	--	pyruvate dehydrogenase E1 beta
arahy.EQ2CTR	146.263	28.6668	35.8996	36.9314	ZH16_S1	0.7475	--	xyloglucan glycosyltransferase 4-like [Glycine max]
arahy.ASAK87	1.1773	0	0.0164399	0.0144285	ZH16_S1	0.986036	--	cellulose synthase-like B4
arahy.QXP99D	0.57424	0	0	0.20532	ZH16_S1	0.642449	--	Auxin efflux carrier family protein
arahy.I4KDIP	0.158755	0	0.0278279	0	ZH16_S1	0.824712	--	Pectate lyase family protein
arahy.T6CC7G	3.55348	0.0980042	0	0	ZH16_S1	0.97242	--	sterol C4-methyl oxidase 1-2
arahy.JU75F3	2454.02	909.42	1093.9	511.026	ZH16_S1	0.55424	--	Unknown protein
arahy.IW34RN	0.139975	0.0495574	0.0105797	0.0319186	ZH16_S1	0.645954	--	calmodulin-binding receptor-like cytoplasmic kinase 3
arahy.IG2SMP	3.67785	0.120667	0	0	ZH16_S1	0.967191	--	major intrinsic protein (MIP) family transporter
arahy.41CPL5	77.421	5.89609	3.54974	1.35986	ZH16_S1	0.923844	--	lysosomal beta glucosidase-like isoform X1 [Glycine max]
arahy.RU9Q67	190.157	79.5953	48.4677	42.3595	ZH16_S1	0.581423	--	transmembrane 9 superfamily member 3-like [Glycine max]
arahy.D7NBKG	23.2098	1.11631	0.141354	0.140517	ZH16_S1	0.951903	--	uncharacterized protein LOC100797300 isoform X1 [Glycine max]
arahy.0CM1H8	0.70758	0.0417512	0	0	ZH16_S1	0.940994	--	Adenine nucleotide alpha hydrolases-like superfamily protein
arahy.Y9LXYY	1.23999	0.154776	0.146658	0.0621802	ZH16_S1	0.875179	--	acid phosphatase
arahy.VFZ81P	0.17288	0	0	0	ZH16_S1	1	--	lysosomal alpha-mannosidase-like [Glycine max]
arahy.KULZ0F	0.973378	0.123151	0.102982	0.0194474	ZH16_S1	0.87348	--	Vps51/Vps67 family (components of vesicular transport) protein
Novel03179	98.8859	44.9626	21.5308	9.2127	ZH16_S1	0.545309	--	--
arahy.15R771	0.148167	0	0	0	ZH16_S1	1	--	Unknown protein
arahy.SS1VDK	8.8443	0.12486	0.480911	1.82466	ZH16_S1	0.793691	--	trehalose-6-phosphate phosphatase
arahy.97WALL	25.4442	1.03277	0.118188	0.108578	ZH16_S1	0.959411	--	subtilisin-like serine protease 2
arahy.5IM6J0	120.596	0.0427198	0	0	ZH16_S1	0.999646	--	Non-specific lipid-transfer protein, putative
arahy.Q339KD	9.1795	0.599434	0	0	ZH16_S1	0.934699	--	Unknown protein
arahy.YJXG1G	2.12413	0.598613	0.798672	0.587756	ZH16_S1	0.624001	--	uncharacterized protein LOC100819024 isoform X2 [Glycine max]
arahy.WES6LZ	0.263452	0	0.0348956	0	ZH16_S1	0.867545	--	protein serine/threonine kinases
arahy.M4RUY8	20.7207	5.68517	1.79169	1.24563	ZH16_S1	0.725628	--	QWRF motif-containing protein 8-like isoform X1 [Glycine max]
arahy.PK90TP	9.01451	1.35581	1.73605	2.52725	ZH16_S1	0.719646	--	E3 ubiquitin-protein ligase RGLG2-like isoform X2 [Glycine max]
arahy.57CZ3J	1.36011	0.563728	0	0	ZH16_S1	0.585528	--	ureide permease 1
arahy.48KEPM	81.8745	8.14549	6.07452	1.08336	ZH16_S1	0.900512	--	beta-xylosidase 3
arahy.S801EL	22.3499	1.31459	0.798947	1.59317	ZH16_S1	0.928717	--	protein serine/threonine phosphatases
arahy.4TG6YL	12.8573	5.40058	4.4386	4.42482	ZH16_S1	0.57996	--	Lung seven transmembrane receptor family protein
arahy.PBD1JU	3.23697	0.759644	0.577561	1.45253	ZH16_S1	0.551269	--	3-oxoacyl-(acyl-carrier) reductase
arahy.50AH1U	20.1773	2.19268	1.85443	1.59052	ZH16_S1	0.891329	--	SAUR-like auxin-responsive protein family
arahy.SQM4K2	45.2436	22.0557	21.213	16.176	ZH16_S1	0.512513	--	serine/threonine protein phosphatase 2A
arahy.E0CBZR	8.59713	0.9644	1.75014	2.05255	ZH16_S1	0.761252	--	organic cation/carnitine transporter 2
arahy.QR900V	7.46452	0	0	0	ZH16_S1	1	--	Unknown protein
arahy.BG34PE	73.959	32.0818	15.4482	7.04225	ZH16_S1	0.566222	--	Mitochondrial substrate carrier family protein
arahy.FKEV40	6.80051	1.98747	0.943496	0.673487	ZH16_S1	0.707747	--	Heavy metal transport/detoxification superfamily protein
arahy.XSHW5Z	31.9757	1.10979	1.36576	1.42368	ZH16_S1	0.955476	--	ATP synthase subunit C family protein
arahy.W35MPH	922.712	21.4063	55.9705	37.0809	ZH16_S1	0.939341	--	Unknown protein
arahy.F6CHDN	24.0613	8.44181	4.95634	4.32029	ZH16_S1	0.649154	--	calcium-dependent protein kinase 33
arahy.LD15T5	0.102596	0.0427747	0	0	ZH16_S1	0.583078	--	Multi-sensor signal transduction histidine kinase n=1 Tax=Geitlerinema sp. PCC 7407 RepID=K9S8U8_9CYAN
arahy.EH6AZ8	13.8398	0.0838993	0.0824335	0	ZH16_S1	0.993938	--	Cysteine proteinases superfamily protein
arahy.1YR532	0.274915	0.035738	0.0111923	0.013195	ZH16_S1	0.870003	--	uncharacterized protein LOC100788333 isoform X1 [Glycine max]
arahy.99ISIC	272.614	5.29978	2.03048	2.07043	ZH16_S1	0.980559	--	uncharacterized protein LOC102665532 isoform X7 [Glycine max]
arahy.6W4GGI	2.63567	0	0	0	ZH16_S1	1	--	cytochrome b5-like heme/steroid-binding domain protein
arahy.3K7MRP	0.57391	0.0644337	0	0.0708406	ZH16_S1	0.876565	--	cysteine desulfurase 2, chloroplastic-like isoform X2 [Glycine max]
arahy.D8MM68	19.3348	4.7929	6.88603	1.31535	ZH16_S1	0.643853	--	expansin-like A2
arahy.5CXD2A	0.288663	0.015133	0.106449	0.0386575	ZH16_S1	0.631234	--	Calmodulin binding protein-like
arahy.G3RHVP	4.15395	1.81132	1.39247	1.2849	ZH16_S1	0.563951	--	uncharacterized protein LOC100809811 isoform X1 [Glycine max]
arahy.PUH2BT	11.1545	1.32472	1.63105	0.998447	ZH16_S1	0.853777	--	putative phospholipid-transporting ATPase 9-like isoform X1 [Glycine max]
arahy.6PQ8NL	2.16182	0.830843	0.332077	0.155255	ZH16_S1	0.615675	--	uncharacterized protein LOC102669532 isoform X2 [Glycine max]
arahy.GAW9KQ	0.4821	0.0385184	0.191796	0.0469147	ZH16_S1	0.602165	--	zinc finger protein CONSTANS-LIKE 12-like [Glycine max]
arahy.S40QI3	27.8235	7.54554	8.51345	8.19498	ZH16_S1	0.694019	--	RHOMBOID-like 2
arahy.A1MQRB	200.325	5.73082	2.75914	1.19138	ZH16_S1	0.971392	--	protein notum homolog isoform X1 [Glycine max]
arahy.RZ8KW2	0.615927	0.0379886	0	0	ZH16_S1	0.938323	--	Chaperone DnaJ-domain superfamily protein
arahy.UP2C0E	38.0124	8.74816	4.81298	4.9951	ZH16_S1	0.76986	--	clathrin interactor EPSIN 2-like isoform X3 [Glycine max]
arahy.KZTX3E	0.303826	0.0423368	0.0689699	0.0827436	ZH16_S1	0.727661	--	Protein kinase family protein
arahy.MY1TBE	0.230483	0	0	0	ZH16_S1	1	--	photosystem I P700 chlorophyll A apoprotein A2
arahy.2A63GV	2.7403	0	0	0	ZH16_S1	1	--	sucrose transporter 4
arahy.7W4W3Z	50.6017	20.401	14.6155	17.7533	ZH16_S1	0.596832	--	S-ribonuclease n=5 Tax=Prunus RepID=A8R5J7_PRUMU
arahy.STU076	29.8549	0.882151	1.06387	0.605184	ZH16_S1	0.964365	--	glycerol-3-phosphate dehydrogenase [NAD(+)] GPDHC1, cytosolic-like [Glycine max]
arahy.S15BQI	2.03223	0.288987	0.39785	0.98531	ZH16_S1	0.515159	--	trehalose-6-phosphate phosphatase
arahy.0D7IHD	7.36713	0	0	0	ZH16_S1	1	--	unknown protein
arahy.S3NECA	3.78173	0.329302	0.205162	0.132709	ZH16_S1	0.912923	--	receptor-like protein kinase 4
arahy.6SHE48	175.498	1.90713	0.459136	0.307355	ZH16_S1	0.989133	--	Gibberellin-regulated family protein
arahy.7N8JZK	0.1489	0	0	0	ZH16_S1	1	--	serine/threonine-protein phosphatase 7 long form homolog [Glycine max]
arahy.SDH2U8	0.276058	0.0579202	0.0295082	0.0917214	ZH16_S1	0.667745	--	exocyst subunit exo70 family protein B1
arahy.36HCF2	11.0023	2.96493	2.08694	1.81253	ZH16_S1	0.730516	--	probable methyltransferase PMT13-like [Glycine max]
arahy.Z8IK0I	10.7752	2.66342	3.68521	2.92604	ZH16_S1	0.657992	--	Calcium-dependent protein kinase n=3 Tax=Arachis hypogaea RepID=V5M2Y8_ARAHY
arahy.2G23RK	58.3411	18.6738	9.76335	5.11575	ZH16_S1	0.67992	--	isocitrate dehydrogenase V
arahy.5I47GQ	15.8301	1.37871	0.285628	0.68753	ZH16_S1	0.912906	--	Cyclopropane-fatty-acyl-phospholipid synthase
arahy.05JZX6	6.70251	0	0	0	ZH16_S1	1	--	unknown protein
[truncated: 20,046 more rows]

## Sheet: ZH6
geneID	ZH6_S1	ZH6_S2	ZH6_S3	ZH6_S4	Stage with highest CS_Score	Highest CS score	TF Family	Functional Annotation
arahy.3XNV5U	4.40202	0.429392	0.125696	0.045767	ZH6_S1	0.902456	--	root meristem growth factor 9-like [Glycine max]
Novel04688	11.1689	4.55814	2.1604	1.92168	ZH6_S1	0.591891	--	--
arahy.26UNPR	202.915	1.36557	15.1295	18.4834	ZH6_S1	0.90891	--	protein YLS7-like [Glycine max]
arahy.DMI4PH	18.158	4.86313	3.26985	1.75624	ZH6_S1	0.732177	--	Unknown protein
arahy.6AU7NA	0.923402	0.251271	0.148548	0	ZH6_S1	0.727885	--	protein SCO1 homolog 2, mitochondrial-like [Glycine max]
arahy.U0TDM7	41.4784	5.07909	4.74569	3.14178	ZH6_S1	0.877548	HB	BEL1-like homeodomain protein 1-like isoform X4 [Glycine max]
arahy.R8GU4C	6.23339	1.02332	1.27545	0.725904	ZH6_S1	0.795384	--	Core-2/I-branching beta-1,6-N-acetylglucosaminyltransferase family protein
arahy.CT4LS7	18.3995	7.81107	4.11378	2.60257	ZH6_S1	0.575474	--	ubiquitin conjugating enzyme 9
arahy.UG6FLW	39.0361	4.67164	2.34331	0.878961	ZH6_S1	0.880325	--	Myosin heavy chain-related protein
arahy.80E1MB	10.5686	0	0	0	ZH6_S1	1	--	SAUR-like auxin-responsive protein family
Novel02910	22.6843	0.818728	5.31519	0.0924592	ZH6_S1	0.765688	--	--
arahy.W7ULQG	2.20437	0.138685	0.108075	0	ZH6_S1	0.937086	--	UDP-Glycosyltransferase superfamily protein
Novel00098	15.6586	2.92195	0.595673	0.33876	ZH6_S1	0.813396	--	--
arahy.DE35CE	28.5632	0	0	0	ZH6_S1	1	--	SAUR-like auxin-responsive protein family
arahy.GEM3QE	21.4166	5.44903	2.76334	2.2963	ZH6_S1	0.74557	--	uncharacterized vacuolar membrane protein YML018C-like isoform X1 [Glycine max]
arahy.Q49AMZ	0.118082	0.0357687	0	0	ZH6_S1	0.697086	--	serine/threonine-protein phosphatase 7 long form homolog [Glycine max]
arahy.LFL6K6	932.734	16.4479	9.0236	9.83236	ZH6_S1	0.982366	--	lipid transfer protein 3
arahy.45BME0	17.9827	3.78442	2.28841	1.96004	ZH6_S1	0.789553	BSD	oxidoreductase, 2OG-Fe(II) oxygenase family protein
arahy.N1DX8X	0.601954	0.109489	0.0346848	0.0315726	ZH6_S1	0.818111	--	Cytochrome P450 superfamily protein
arahy.PR6200	4.52981	2.17095	2.16213	1.20185	ZH6_S1	0.520741	--	F-box protein interaction domain protein
arahy.RGBH4Y	6.95475	0.627084	0.546577	0.582094	ZH6_S1	0.909834	--	Heavy metal transport/detoxification superfamily protein
arahy.U4ADFF	0.611942	0.062759	0.0257842	0.04282	ZH6_S1	0.897443	--	Protein kinase superfamily protein
arahy.V34G3Y	22.1852	7.74835	6.21421	3.67823	ZH6_S1	0.650743	--	Unknown protein
arahy.28RV6S	6.3172	2.9094	2.15579	2.01907	ZH6_S1	0.539448	--	hydroxymethylglutaryl-CoA synthase-like [Glycine max]
arahy.T3YMAA	0.190935	0.0748013	0	0	ZH6_S1	0.608238	WRKY	probable WRKY transcription factor 28-like [Glycine max]
arahy.50D6TG	29.3503	6.11569	3.44515	2.3431	ZH6_S1	0.791631	--	BTB/POZ domain-containing protein NPY2-like isoform X3 [Glycine max]
arahy.B845YX	61.2714	11.7288	6.66681	6.7431	ZH6_S1	0.808576	--	MATE efflux family protein
arahy.8HPN5U	2.48	0.866784	0.105682	0.351013	ZH6_S1	0.65049	--	senescence-associated protein
arahy.XUAL01	10.0807	0.814648	1.12875	0.170086	ZH6_S1	0.888029	WRKY	WRKY family transcription factor family protein
arahy.0BD95F	2.52684	0.276116	0.09109	0.0829167	ZH6_S1	0.890727	--	Unknown protein
arahy.P00G4Y	3.3544	0.121312	0.0135277	0	ZH6_S1	0.963835	HB	BEL1-like homeodomain protein 8-like isoform X2 [Glycine max]
arahy.MR686J	1.31358	0	0	0	ZH6_S1	1	--	ruBisCO-associated protein-like [Glycine max]
Novel01515	0.65729	0.183646	0.259405	0.0566742	ZH6_S1	0.605342	--	--
arahy.C8ILII	6.50758	2.51402	2.15008	1.14436	ZH6_S1	0.613678	MYB	MYB transcription factor MYB109 [Glycine max]
arahy.M58F5L	0.184493	0.0444157	0	0	ZH6_S1	0.759256	--	Disease resistance-responsive (dirigent-like protein) family protein
arahy.KM1FBW	0.12398	0	0	0	ZH6_S1	1	--	ascorbate peroxidase 1
arahy.Q6YSSX	0.332027	0	0	0	ZH6_S1	1	--	Zinc knuckle family protein n=1 Tax=Oryza sativa subsp. japonica RepID=H2KW38_ORYSJ
arahy.SMM6ZV	2.10024	0.645942	0.582728	0.285701	ZH6_S1	0.692444	--	uncharacterized protein LOC100806339 [Glycine max]
arahy.HVHQ42	3.30104	0	0	0	ZH6_S1	1	--	choline kinase 1
arahy.HV5BK9	3.24141	1.39582	1.46192	1.00857	ZH6_S1	0.548987	--	subtilisin-like serine protease 2
arahy.8KGB21	14.8826	0.587559	1.26864	0.546213	ZH6_S1	0.914757	--	Eukaryotic aspartyl protease family protein
arahy.I6S6H6	0.397491	0	0.0407942	0	ZH6_S1	0.897371	--	chalcone synthase [Glycine max]
arahy.WI67VP	544.884	173.423	200.299	118.116	ZH6_S1	0.632401	--	cysteine proteinase inhibitor 1 [Glycine max]
arahy.31PXUJ	0.448241	0	0	0	ZH6_S1	1	--	Protein phosphatase 2C family protein
arahy.HLS3VZ	54.3145	5.81482	2.41633	1.68695	ZH6_S1	0.892942	--	soluble inorganic pyrophosphatase
arahy.6S4II0	6.14044	0.957584	0.157456	0	ZH6_S1	0.844053	--	subtilisin-like serine protease 2
arahy.9NB33V	1.22999	0.130769	0	0	ZH6_S1	0.893683	--	Ankyrin repeat family protein
arahy.T1WRD7	0.606014	0.0175981	0.105678	0.0679055	ZH6_S1	0.825619	--	UDP-glucosyltransferase family protein
arahy.Q4QPDX	17.0937	8.14209	5.37847	2.82639	ZH6_S1	0.523678	--	O-acetyltransferase family protein
arahy.F67ZD9	0.819034	0	0.0230294	0	ZH6_S1	0.971882	--	phospholipase D P2
arahy.NC5V37	0.272951	0	0.046419	0	ZH6_S1	0.829937	--	ATP synthase subunit a-like [Glycine max]
arahy.X563NF	1.27783	0.0751999	0	0	ZH6_S1	0.94115	--	NADP-dependent alkenal double bond reductase
arahy.SHPC4Z	13.2635	5.21802	3.66228	4.43404	ZH6_S1	0.606588	--	myosin 2
arahy.IY78PD	0.844892	0.0515832	0.030153	0	ZH6_S1	0.938947	--	Unknown protein
arahy.MZCS2R	78.444	11.4479	20.7026	20.1866	ZH6_S1	0.736084	--	Bifunctional polymyxin resistance arnA protein n=2 Tax=Papilionoideae RepID=G7JIF7_MEDTR
arahy.SK03LI	26.2712	11.7235	6.59004	7.02665	ZH6_S1	0.553752	--	glutathione peroxidase 4
arahy.D0V14N	5.15658	0.62497	0.512186	0.458411	ZH6_S1	0.878801	--	UBX domain-containing protein
arahy.J580FK	56.6091	20.4609	12.834	12.6263	ZH6_S1	0.638559	--	protein IQ-DOMAIN 14-like isoform X2 [Glycine max]
arahy.0DZ072	0.180302	0.0103161	0	0	ZH6_S1	0.942784	--	disease resistance protein [Glycine max]
arahy.R5QH0H	1.82553	0.283228	0.124207	0.0651429	ZH6_S1	0.844852	--	Auxin efflux carrier family protein
arahy.WE6MWD	18.8767	1.50507	1.32438	1.3655	ZH6_S1	0.920268	--	glutamate dehydrogenase 1
arahy.8ZHK7B	24.8914	7.00382	4.40537	3.59074	ZH6_S1	0.718625	--	Nucleotide-sugar transporter/ sugar porter n=3 Tax=Zea mays RepID=B6UBN6_MAIZE
arahy.WLZ7Z3	18.0403	7.54721	1.31926	0.551091	ZH6_S1	0.581646	--	fatty acid desaturase 8
arahy.I2W0TQ	0.105494	0	0.0473272	0	ZH6_S1	0.551376	--	O-acyltransferase (WSD1-like) family protein
arahy.TIU0MY	12.7634	5.27028	3.35464	2.96515	ZH6_S1	0.58708	--	NRAMP metal ion transporter 2
arahy.X99BTJ	0.203077	0	0	0	ZH6_S1	1	--	Nucleic acid-binding, OB-fold-like protein
arahy.5ELN25	49.026	0	0	0.0637642	ZH6_S1	0.998699	--	probable pectinesterase/pectinesterase inhibitor 21-like [Glycine max]
arahy.BRAD7V	0.402967	0.0345839	0.0733013	0	ZH6_S1	0.818096	--	nucleolin 1-like [Glycine max]
arahy.52KDTF	30.5951	14.0483	8.27314	6.43153	ZH6_S1	0.540832	--	alpha-glucan water dikinase
arahy.A3AWFZ	32.5545	8.40926	6.83967	4.84048	ZH6_S1	0.741686	--	Integral membrane Yip1 family protein
arahy.56WBIF	0.803161	0	0	0	ZH6_S1	1	--	Adenine nucleotide alpha hydrolases-like superfamily protein
arahy.DLXF41	25.4895	1.13463	1.4066	0.255286	ZH6_S1	0.944817	--	blue copper protein-like [Glycine max]
arahy.5BA4ES	8.92273	2.6927	3.1923	0.657782	ZH6_S1	0.642228	bHLH	transcription factor bHLH63-like [Glycine max]
arahy.70MDEI	14.5014	0.336494	0.115801	0	ZH6_S1	0.976796	--	Unknown protein
arahy.WY84UI	0.228377	0	0	0	ZH6_S1	1	--	blue copper protein-like [Glycine max]
arahy.2Z03QX	33.2939	16.4522	11.5506	6.38547	ZH6_S1	0.50585	--	uncharacterized protein LOC100305529 isoform X2 [Glycine max]
arahy.640VZ5	15.4821	0.0812655	0.0380013	0	ZH6_S1	0.994751	--	Copper amine oxidase family protein
arahy.F1TUFL	320.869	7.85333	34.7134	10.5088	ZH6_S1	0.891814	--	Gibberellin-regulated family protein
arahy.1N783C	4.88952	0.358239	0.233237	0	ZH6_S1	0.926733	--	18.1 kDa class I heat shock protein-like [Glycine max]
arahy.BDJ8VI	2.55989	0.0448352	0.0262085	0.0477137	ZH6_S1	0.981361	--	chalcone synthase [Glycine max]
Novel02590	3.70091	1.29459	1.03211	0	ZH6_S1	0.650197	--	--
arahy.SA7FDN	0.203567	0	0	0	ZH6_S1	1	--	golgin candidate 5
arahy.HW27AX	0.732412	0	0	0	ZH6_S1	1	--	probable sugar phosphate/phosphate translocator [Glycine max]
arahy.KRAQ4G	0.105334	0	0	0	ZH6_S1	1	--	Cytochrome P450 superfamily protein
arahy.76S2NJ	33.3982	13.7784	11.0845	13.1225	ZH6_S1	0.587451	--	microtubule-associated protein futsch isoform X1 [Glycine max]
arahy.TJ0W48	1.67967	0.687905	0.671929	0.244655	ZH6_S1	0.590452	--	Unknown protein
arahy.VRPR0Q	4.76652	1.57411	2.02056	1.34584	ZH6_S1	0.576094	--	uncharacterized protein At1g66480-like [Glycine max]
arahy.CVA9UE	7.52773	0.393524	0.588236	0.197479	ZH6_S1	0.921857	WRKY	probable WRKY transcription factor 48 [Glycine max]
arahy.R6C5BS	15.7378	3.66963	4.25962	1.40438	ZH6_S1	0.729338	--	lysosomal beta glucosidase-like isoform X4 [Glycine max]
arahy.ZJ3UGF	17.401	5.56714	4.7705	3.55635	ZH6_S1	0.680068	--	Protein kinase superfamily protein
arahy.HD7TF9	1.33777	0.238569	0.140656	0.241083	ZH6_S1	0.819787	TF	transcription factor bHLH123-like isoform X2 [Glycine max]
arahy.IHD6K8	0.67021	0.191962	0.103433	0	ZH6_S1	0.713579	--	UDP-Glycosyltransferase superfamily protein
arahy.DG0M13	0.151276	0	0	0	ZH6_S1	1	--	Stigma-specific Stig1 family protein
arahy.97KQTU	39.136	4.51838	1.68757	4.66485	ZH6_S1	0.880804	--	Unknown protein
arahy.I6Q85W	9.12713	1.79351	1.78146	0.162857	ZH6_S1	0.803496	--	Avr9/Cf-9 rapidly elicited protein
arahy.W5W2QE	6.12343	1.20111	1.411	1.44645	ZH6_S1	0.763784	--	rho GDP-dissociation inhibitor 1-like [Glycine max]
arahy.RW8FUD	2.51685	0.904472	0.0448568	0	ZH6_S1	0.640634	--	Heavy metal transport/detoxification superfamily protein
arahy.GV9VS9	10.0563	1.92892	2.88772	4.27053	ZH6_S1	0.575339	--	GRAM domain-containing protein / ABA-responsive protein-related
arahy.WGK629	0.110601	0	0	0	ZH6_S1	1	--	Cytochrome P450 superfamily protein
arahy.LEI4AX	1.91082	0.378915	0.44247	0.172844	ZH6_S1	0.768439	--	uncharacterized protein LOC100797471 isoform X3 [Glycine max]
arahy.N1E5J3	24.3494	7.42507	6.4182	7.40684	ZH6_S1	0.695061	--	phloem protein 2-B2
arahy.31ALDJ	0.923418	0.0285581	0	0.0550985	ZH6_S1	0.940332	--	basic helix-loop-helix (bHLH) DNA-binding superfamily protein
arahy.T6QC8B	28.5692	7.54674	7.43806	3.1434	ZH6_S1	0.735843	--	phosphoethanolamine N-methyltransferase
arahy.L22S2R	0.873883	0.273523	0.258149	0.175047	ZH6_S1	0.687003	--	Cellulose synthase family protein
arahy.H5H05M	22.7706	9.03318	5.75291	2.39915	ZH6_S1	0.603297	--	allene oxide cyclase 3
arahy.17BKMA	0.669275	0	0.0508921	0	ZH6_S1	0.923959	--	phosphate transporter 1
arahy.A40EG2	0.61622	0	0	0	ZH6_S1	1	--	FASCICLIN-like arabinogalactan-protein 11
arahy.B0YTQL	1.2152	0.173911	0.283516	0.262606	ZH6_S1	0.766692	--	pectinesterase 11
arahy.D6TL18	1.66509	0	0	0	ZH6_S1	1	--	spermidine hydroxycinnamoyl transferase-like [Glycine max]
arahy.A2R99Z	0.1587	0.0159253	0.0207602	0.0377948	ZH6_S1	0.761848	--	Peroxidase superfamily protein
arahy.U63JN6	0.512818	0.210265	0	0	ZH6_S1	0.589981	--	ATP-binding/protein serine/threonine kinase [Glycine max]
arahy.H67YCB	1.2926	0.145526	0.23215	0.538781	ZH6_S1	0.583179	--	replication protein A 1A
arahy.T6M1B4	10.0531	4.10883	1.69358	0.960972	ZH6_S1	0.591286	--	mitochondrial substrate carrier family protein B-like [Glycine max]
arahy.08H2K0	6.43426	2.36661	0.738572	0.0252126	ZH6_S1	0.632186	--	asparagine synthetase 3
arahy.LMSP6K	5.8676	2.78834	2.38353	1.46588	ZH6_S1	0.52479	--	protein PLANT CADMIUM RESISTANCE 2-like [Glycine max]
arahy.CFLV5S	6.95443	0.337681	0.084618	0.096697	ZH6_S1	0.951444	HB	BEL1-like homeodomain protein 2-like isoform X3 [Glycine max]
arahy.TFW9WI	0.464086	0	0	0	ZH6_S1	1	--	chalcone synthase-like [Glycine max]
arahy.JT7MF5	0.915096	0	0	0	ZH6_S1	1	TF	MYB transcription factor MYB92 [Glycine max]
arahy.GX1WML	41.477	6.92426	11.7112	11.9862	ZH6_S1	0.711015	--	MLO-like protein 13-like [Glycine max]
arahy.MD6CKA	1.21541	0.128464	0.125599	0	ZH6_S1	0.894304	--	thioredoxin 2
arahy.T4YGUP	0.197072	0	0	0	ZH6_S1	1	--	unknown protein
arahy.BVUT3K	18.0142	2.52704	1.65645	0.430806	ZH6_S1	0.859719	--	SAUR-like auxin-responsive protein family
arahy.RJA1IC	140.83	0.0419605	0.0546997	0	ZH6_S1	0.999612	AP2-EREBP	ethylene-responsive transcription factor 3 [Glycine max]
arahy.5FG7TI	131.337	1.87994	1.27375	0.876534	ZH6_S1	0.985686	--	Transmembrane amino acid transporter family protein
arahy.6IQ3WR	0.641023	0	0	0	ZH6_S1	1	--	cation/H+ exchanger 3
arahy.QD5JHM	206.832	60.3613	77.3571	31.2624	ZH6_S1	0.625991	--	Hypoxia-responsive family protein
arahy.TK6Q6V	21.1855	0.0727	0.0146701	0	ZH6_S1	0.996568	--	transmembrane amino acid transporter family protein
arahy.BS0ST2	0.391893	0	0	0	ZH6_S1	1	--	Aquaporin-like superfamily protein
arahy.K7GDTJ	0.121394	0	0.0391658	0.0354802	ZH6_S1	0.677366	--	disease resistance protein (TIR-NBS-LRR class), putative
Novel03425	0.613302	0.252072	0.151798	0	ZH6_S1	0.588992	--	--
arahy.0093F6	3.53412	1.71496	1.07084	1.17602	ZH6_S1	0.514743	--	uncharacterized protein LOC100809811 isoform X1 [Glycine max]
arahy.GCX8RD	0.752204	0.0405347	0	0	ZH6_S1	0.946112	--	putative ribonuclease H protein At1g65750-like [Glycine max]
arahy.76FTKD	58.8799	5.35602	9.9264	7.91956	ZH6_S1	0.831413	bZIP	TGACG-sequence-specific DNA-binding protein TGA-1B-like [Glycine max]
arahy.G84CIW	3.15936	0	0	0	ZH6_S1	1	--	glycerol-3-phosphate acyltransferase 6
arahy.0M6VMZ	0.605061	0.0555211	0.0588392	0	ZH6_S1	0.902755	--	Dof-type zinc finger DNA-binding family protein
arahy.F0QQQY	1.55723	0.189398	0.279572	0.162038	ZH6_S1	0.820468	--	Glucose-1-phosphate adenylyltransferase family protein
arahy.1ING2C	0.572808	0.022961	0	0.0181642	ZH6_S1	0.959915	--	receptor-like protein kinase 2
arahy.ATW5XU	1.73444	0.796238	0.586824	0.206918	ZH6_S1	0.540925	--	cation/H+ exchanger 20
arahy.1T4KVN	1.22868	0.277551	0.136454	0	ZH6_S1	0.774106	WRKY	WRKY family transcription factor
arahy.W2KP9A	97.3593	0.507471	0.376802	0.817315	ZH6_S1	0.991605	--	Integral membrane protein n=1 Tax=Beta vulgaris RepID=Q39416_BETVU
arahy.5P3U81	1.13258	0.0190498	0	0	ZH6_S1	0.98318	NAC	NAC domain protein,
arahy.SM0BS0	12.3704	0.937107	1.95414	2.08066	ZH6_S1	0.831804	--	uncharacterized protein LOC100811424 isoform X5 [Glycine max]
Novel03165	33.0102	5.17499	4.36141	3.20222	ZH6_S1	0.84323	--	--
Novel00533	4.68039	0.311544	0.175229	0.89776	ZH6_S1	0.808187	--	--
arahy.NN0MCR	105.78	6.86713	3.22778	1.80085	ZH6_S1	0.935081	--	transport inhibitor response 1-like protein-like [Glycine max]
arahy.UD8U5Y	24.3171	7.86723	2.51026	2.81981	ZH6_S1	0.676473	--	Nucleotide-sugar transporter/ sugar porter n=3 Tax=Zea mays RepID=B6UBN6_MAIZE
Novel01406	2.42785	0.0186944	0	0.0809425	ZH6_S1	0.966661	--	--
arahy.K5EF2U	1.62978	0.0662671	0.772451	0.488958	ZH6_S1	0.52604	Orphans	zinc finger protein CONSTANS-LIKE 2-like [Glycine max]
arahy.R4PVYI	0.154154	0.0456507	0	0	ZH6_S1	0.703863	--	hypothetical protein
arahy.T1QA7S	1.46823	0.487964	0.234498	0.33704	ZH6_S1	0.667652	--	phosphate transporter PHO1 homolog 3-like isoform 1 [Glycine max]
arahy.94DDXG	10.9737	1.32196	0.16957	0.0578883	ZH6_S1	0.879534	--	NADPH:quinone oxidoreductase
arahy.XR8H09	4.34794	1.41684	0.697942	0.359166	ZH6_S1	0.674136	--	Calcium/calmodulin-dependent serine/threonine-protein kinase 1 n=5 Tax=Oryza RepID=CAMK1_ORYSJ
arahy.K7D9EI	1.46973	0.598669	0.183711	0	ZH6_S1	0.592667	--	titin-like [Glycine max]
arahy.LKBY4F	13.9266	0.111335	0	0	ZH6_S1	0.992006	--	hypothetical protein
arahy.F5ML4Q	6.05821	1.93305	1.56197	1.39755	ZH6_S1	0.680921	--	alcohol dehydrogenase 1
arahy.XS9HJ1	0.157762	0.067003	0.028483	0	ZH6_S1	0.575291	--	tRNA (guanine(37)-N1)-methyltransferase, putative
arahy.FQX7TC	18.4387	5.84766	4.0119	3.63605	ZH6_S1	0.68286	--	Unknown protein
arahy.4T5ENZ	28.1029	0.874604	0.664793	0.667687	ZH6_S1	0.968879	--	myosin 1
Novel04365	0.154077	0.0598337	0.0184392	0	ZH6_S1	0.611663	--	--
arahy.H7UR3I	0.272585	0.0481351	0.0194264	0.0353666	ZH6_S1	0.823413	--	probable pectinesterase/pectinesterase inhibitor 12-like [Glycine max]
arahy.PISI89	0.149301	0	0	0	ZH6_S1	1	--	SNARE associated Golgi protein family
arahy.FXE6GW	1.82477	0.0121843	0.0129125	0	ZH6_S1	0.992924	--	terpene synthase 14
arahy.GIJ59W	4.7424	0.0815191	0	0.157279	ZH6_S1	0.966836	TF	ethylene-responsive transcription factor 1B
arahy.0GVW71	31.8271	9.33702	5.70097	4.92878	ZH6_S1	0.706633	--	U-box domain-containing protein 11-like [Glycine max]
arahy.00B185	309.024	2.5385	8.19421	9.86196	ZH6_S1	0.968087	--	beta galactosidase 1
arahy.MR6WYG	32.9168	1.02985	0.435197	0.120112	ZH6_S1	0.968714	--	cytochrome P450, family 718
arahy.MZSV4J	0.855913	0	0.13635	0	ZH6_S1	0.840697	--	Unknown protein
arahy.UI3LS8	0.277015	0.0893064	0	0	ZH6_S1	0.677611	--	uncharacterized protein LOC100500694 [Glycine max]
arahy.ZUG4EU	14.2062	6.61036	2.84948	2.60434	ZH6_S1	0.534684	--	oxidoreductase, 2OG-Fe(II) oxygenase family protein
arahy.VH0R1T	24.8532	10.4691	4.47117	2.52777	ZH6_S1	0.578762	--	Unknown protein
arahy.KTYY32	0.138061	0.0247046	0.0161024	0	ZH6_S1	0.821061	--	hypothetical protein
arahy.590LKT	0.102688	0	0	0	ZH6_S1	1	--	dehydrodolichyl diphosphate synthase 2-like [Glycine max]
arahy.VW4TEM	31.6781	11.3059	13.1072	4.87964	ZH6_S1	0.586239	bZIP	TGACG-motif-binding factor [Glycine max]
arahy.ZIU9VW	29.1256	6.51114	4.11329	3.80805	ZH6_S1	0.776446	--	Protein kinase superfamily protein
arahy.GZ0G6J	94.4065	2.12976	10.165	8.19491	ZH6_S1	0.892328	--	OTU-like cysteine protease
arahy.WHVZ2S	0.421656	0.0373506	0.145127	0	ZH6_S1	0.655817	--	Protein kinase superfamily protein
arahy.230XUM	15.6689	3.99554	3.63449	2.48613	ZH6_S1	0.745002	--	RNA-binding protein 1-like [Glycine max]
arahy.PFQ45M	57.9258	12.6508	7.28267	3.63822	ZH6_S1	0.781604	--	Citrate synthase family protein
arahy.DA0PX7	4.77505	0.488148	0.102224	0.10815	ZH6_S1	0.897771	--	sulfate transporter 1
arahy.S4MMCZ	16.5421	3.10855	2.24201	1.69249	ZH6_S1	0.812082	--	beta-1,4-xylosyltransferase, putative
arahy.KY95SZ	0.109372	0	0	0	ZH6_S1	1	--	hypothetical protein
arahy.NHX0KA	1.25009	0	0	0	ZH6_S1	1	--	HXXXD-type acyl-transferase family protein
arahy.Y18RHQ	27.2005	0.137233	0.0547303	0	ZH6_S1	0.994955	--	NAD(P)-binding Rossmann-fold superfamily protein
arahy.0QV8DZ	2.11927	0.82491	0.754496	0.480127	ZH6_S1	0.610757	--	uncharacterized protein LOC102666946 isoform X4 [Glycine max]
arahy.KPZY4F	0.105124	0	0	0	ZH6_S1	1	--	putative ribonuclease H protein At1g65750-like [Glycine max]
arahy.LGEW2E	1.47847	0.22568	0	0	ZH6_S1	0.847356	--	ion channel castor
arahy.VU0ITX	52.0938	0.777686	0.301798	0.105067	ZH6_S1	0.985071	--	O-acyltransferase (WSD1-like) family protein
arahy.J2YHHP	68.9984	28.9429	11.0538	5.56051	ZH6_S1	0.580527	--	delta(24)-sterol reductase-like protein
arahy.L7CY27	27.8734	13.9244	5.90351	3.25218	ZH6_S1	0.500441	--	hypothetical protein
arahy.CP6VIJ	12.8055	3.48644	2.85585	3.50622	ZH6_S1	0.726195	--	E3 ubiquitin-protein ligase RGLG2-like isoform X4 [Glycine max]
arahy.N1UDB5	47.1641	0.187644	0	0.222664	ZH6_S1	0.995279	--	SAUR-like auxin-responsive protein family
arahy.AR5SA1	26.8705	9.68128	5.10157	4.88339	ZH6_S1	0.639706	--	Core-2/I-branching beta-1,6-N-acetylglucosaminyltransferase family protein
arahy.4GF8V7	162.002	1.18591	0.231839	0.0894112	ZH6_S1	0.99268	--	1-aminocyclopropane-1-carboxylate oxidase
arahy.L0R0IL	722.836	29.0798	11.2617	3.15712	ZH6_S1	0.95977	--	Non-specific lipid-transfer protein, putative
arahy.NZL2UA	79.7827	1.47721	0.542462	0.128727	ZH6_S1	0.981485	--	probable xyloglucan glycosyltransferase 5-like [Glycine max]
arahy.WU4ITJ	8.54191	3.84127	2.63948	2.2952	ZH6_S1	0.550303	HB	DNA binding protein, putative n=6 Tax=rosids RepID=B9SVC7_RICCO
arahy.1EQZ0A	0.324439	0	0	0	ZH6_S1	1	--	1-aminocyclopropane-1-carboxylate synthase 11
arahy.A6Q8V1	18.5499	1.46564	0.635686	0.402994	ZH6_S1	0.920989	--	unknown protein
arahy.DCC0MI	22.1139	4.04117	2.72744	1.12178	ZH6_S1	0.817257	--	beta galactosidase 1
arahy.R571P7	3.17207	0	0	0	ZH6_S1	1	--	xyloglucan endotransglucosylase/hydrolase 16
Novel01904	42.9858	18.9847	9.3523	5.38656	ZH6_S1	0.55835	--	--
arahy.YL00Q2	2.55276	0.347097	0.7305	0.90701	ZH6_S1	0.644694	--	receptor-like kinase 1
arahy.G7BP07	0.434223	0	0.0530988	0	ZH6_S1	0.877715	--	Sec14p-like phosphatidylinositol transfer family protein
arahy.Z0KP5S	6.59156	0.0849007	0.0248144	0	ZH6_S1	0.98712	--	myosin heavy chain-related
arahy.N3Q478	0.173215	0	0.015953	0	ZH6_S1	0.907901	--	probable pectinesterase/pectinesterase inhibitor 6-like [Glycine max]
arahy.2QB43J	1.66438	0.18528	0.010082	0	ZH6_S1	0.888679	--	receptor-like protein kinase 2
arahy.U5WKYJ	7.89114	0.670379	0.414914	0.0354087	ZH6_S1	0.915047	--	allene oxide synthase
arahy.QKB3E6	20.8074	4.09069	2.7155	1.91572	ZH6_S1	0.803402	--	alanine-tRNA ligases
arahy.845W93	58.2495	21.3235	9.36727	7.7457	ZH6_S1	0.633928	--	Nucleotide-sugar transporter family protein
arahy.XJC9R2	0.652819	0.230289	0	0	ZH6_S1	0.647239	--	beta-galactosidase 16
arahy.US8HBC	1.60711	0.106538	0.0941088	0.163808	ZH6_S1	0.898073	--	alpha-galactosidase 2
arahy.24IXRB	42.3254	1.86233	2.75357	2.7414	ZH6_S1	0.934943	--	protein YLS7-like [Glycine max]
arahy.MM015B	0.602222	0.0736778	0.0960463	0.0874284	ZH6_S1	0.840513	--	Saccharopine dehydrogenase
arahy.96UBDB	30.1529	6.56888	2.69861	1.08271	ZH6_S1	0.782148	--	chorismate mutase 2
arahy.0I35HW	4.16324	0.0182225	0.0193115	0	ZH6_S1	0.995361	--	GDSL-like Lipase/Acylhydrolase superfamily protein
arahy.HCI8A4	5.23547	1.31875	0.94963	0.888308	ZH6_S1	0.748112	--	WD repeat-containing protein 44-like [Glycine max]
arahy.UM33GY	33.0565	0	0.67044	0	ZH6_S1	0.979718	--	SAUR-like auxin-responsive protein family
Novel03406	10.8213	1.86959	1.67808	2.28301	ZH6_S1	0.789027	--	--
arahy.D7EMLG	1.37543	0	0	0	ZH6_S1	1	--	uncharacterized protein LOC102662187 [Glycine max]
arahy.JZIS5A	9.47145	2.5696	1.36772	0.30255	ZH6_S1	0.7287	--	Phosphoglycerate mutase family protein
arahy.FGA0WN	0.675026	0	0	0	ZH6_S1	1	--	glyoxal oxidase-related protein
arahy.R7PSBK	9.16954	0.0694189	0.0271227	0.0246891	ZH6_S1	0.992429	--	GTP-binding nuclear protein Ran-3 [Glycine max]
arahy.B1R1KQ	74.4702	12.1899	4.84499	1.35688	ZH6_S1	0.836312	--	Cell wall protein EXP2 n=1 Tax=Mirabilis jalapa RepID=Q84L40_MIRJA
arahy.D53E9A	2.53976	0.206491	0.793333	0.507172	ZH6_S1	0.687635	--	uncharacterized protein LOC100788333 isoform X5 [Glycine max]
arahy.GEQ2UZ	13.9271	0.929498	0.117678	0.321358	ZH6_S1	0.93326	LIM	GATA type zinc finger transcription factor family protein
arahy.CN40UY	21.2105	5.23857	1.83118	1.80925	ZH6_S1	0.75302	--	RING-H2 finger protein 2B
arahy.GR4ZGT	2.35965	0.743214	0.440564	0.158664	ZH6_S1	0.685032	--	Auxin efflux carrier family protein
arahy.NX75ZF	31.5893	5.32582	1.69527	0.983024	ZH6_S1	0.831405	--	uncharacterized protein LOC100783018 [Glycine max]
arahy.Q3A75N	0.161288	0	0.0401176	0	ZH6_S1	0.751267	--	tetratricopeptide repeat protein 4 homolog isoform X2 [Glycine max]
arahy.80FISQ	7.25618	0.322237	0.231398	0	ZH6_S1	0.955591	--	external alternative NAD(P)H-ubiquinone oxidoreductase B2, mitochondrial-like isoform X2 [Glycine max]
arahy.G0J8BA	0.109108	0.0435128	0	0	ZH6_S1	0.601196	--	receptor kinase 3
arahy.TY26DT	0.346046	0.0231627	0	0	ZH6_S1	0.933065	--	structural constituent of ribosome
arahy.0E5XS1	1.87324	0.765792	0.353186	0.350745	ZH6_S1	0.591195	--	uncharacterized protein LOC100808348 [Glycine max]
arahy.2Q5L9E	4.48994	0.107397	0.0350008	0.127441	ZH6_S1	0.971616	--	DUF241 domain protein
arahy.PKFN9U	383.121	21.9269	9.33534	3.21993	ZH6_S1	0.942768	--	endoglucanase 6-like [Glycine max]
arahy.DIZ6KI	2.87088	0.365482	0.0951508	0.0692905	ZH6_S1	0.872693	--	uncharacterized protein LOC102668485 [Glycine max]
arahy.FXK9PR	13.897	0	0	0	ZH6_S1	1	--	uncharacterized protein LOC100527473 [Glycine max]
arahy.3A5YKQ	1.47012	0	0	0.670206	ZH6_S1	0.544115	--	protein FANTASTIC FOUR 3-like [Glycine max]
arahy.G7DPQJ	0.413122	0.117198	0	0	ZH6_S1	0.716311	--	endoglucanase 25-like [Glycine max]
arahy.EN81KK	65.4481	29.7376	13.9349	10.7625	ZH6_S1	0.545631	--	cytochrome B-c1 complex subunit 6
arahy.ZUE09J	2.9179	0.722105	0.141982	0	ZH6_S1	0.752526	--	UDP-Glycosyltransferase superfamily protein
arahy.Z50VDZ	93.0914	30.4822	12.8784	6.50381	ZH6_S1	0.672557	--	cytochrome c-2
arahy.R19W3K	0.892083	0	0.158023	0.0690491	ZH6_S1	0.822861	--	lycopene cyclase
arahy.W1HAKQ	0.362009	0.160961	0.154289	0.0589794	ZH6_S1	0.555368	--	ATP-binding ABC transporter
arahy.XTU872	7.18605	0.0232385	0	0	ZH6_S1	0.996766	--	Plasma membrane mannitol transporter n=1 Tax=Arachis hypogaea RepID=B2Z3Y4_ARAHY
arahy.P8Q0JH	0.21629	0	0	0	ZH6_S1	1	--	sulfate transporter 3
arahy.1YIR2K	0.794942	0.269605	0.0140274	0	ZH6_S1	0.660849	--	laccase 10
arahy.PF0HW7	0.259307	0	0	0	ZH6_S1	1	--	ROP-interactive CRIB motif-containing protein 6
arahy.IAC0XP	1.30187	0.359453	0.0813344	0	ZH6_S1	0.723896	--	receptor lectin kinase
arahy.T1UA0C	7.24088	0.260226	0.113045	0.0649918	ZH6_S1	0.964062	--	phospholipase D P2
arahy.QM1PW2	7.44225	0.0712148	0	0	ZH6_S1	0.990431	--	lipase 1
arahy.76PVGY	3.82216	0.319078	0.226364	0.610971	ZH6_S1	0.840151	--	uncharacterized protein LOC100796572 [Glycine max]
arahy.G3FV2L	2.11652	0.60963	1.04777	0.747166	ZH6_S1	0.504955	NAC	NAC domain-containing protein 8-like [Glycine max]
arahy.DAE2HF	32.2224	2.22221	0.774895	0.352974	ZH6_S1	0.931035	--	beta-D-xylosidase 4
arahy.WJM3KC	8.38525	0	0	0.062623	ZH6_S1	0.992532	--	Unknown protein
arahy.6HIR6Y	0.2363	0	0.0176327	0	ZH6_S1	0.92538	--	benzyl alcohol O-benzoyltransferase-like [Glycine max]
arahy.5A3JDR	1.46067	0.199611	0.141469	0.0858502	ZH6_S1	0.863343	--	12-oxophytodienoate reductase 2
arahy.3E939S	0.894644	0	0	0	ZH6_S1	1	--	Glutaredoxin family protein
arahy.JA1EPG	8.46006	3.87586	2.1926	0.784672	ZH6_S1	0.541864	--	glucan endo-1,3-beta-glucosidase [Glycine max]
arahy.SDZN59	41.025	19.1179	13.4016	10.096	ZH6_S1	0.533993	--	cell number regulator 8-like [Glycine max]
arahy.EYNG7S	17.515	7.39696	6.59084	4.0569	ZH6_S1	0.577679	--	Pollen Ole e 1 allergen and extensin family protein
arahy.D0QZQ6	4.01648	0.141028	0.533874	0.28937	ZH6_S1	0.867079	--	equilibrative nucleoside transporter 6
arahy.PA307L	10.9312	1.98625	2.35948	1.63804	ZH6_S1	0.784152	--	probable carboxylesterase 2-like [Glycine max]
arahy.59PC4W	0.991011	0.0261803	0	0	ZH6_S1	0.973582	--	GDSL-like Lipase/Acylhydrolase superfamily protein
arahy.04F84Q	2.27519	0.0143122	0.0682485	0.0641842	ZH6_S1	0.970003	--	linoleate 13S-lipoxygenase 2-1, related protein
arahy.SDY5DC	0.485863	0	0.0671868	0	ZH6_S1	0.861716	--	WD repeat-containing protein 3-like [Glycine max]
arahy.PB1D04	9.90485	0.706818	0.216444	0	ZH6_S1	0.928639	--	3-ketoacyl-CoA synthase 12
Novel02513	0.73954	0.241518	0.148435	0.0900777	ZH6_S1	0.673422	--	--
arahy.Q0CWXY	38.4203	13.8358	3.50217	0.813291	ZH6_S1	0.639883	--	uncharacterized protein LOC100791257 [Glycine max]
arahy.1QJ78E	45.7926	1.8168	6.08587	3.66372	ZH6_S1	0.867099	HB	DNA-binding protein n=1 Tax=Catharanthus roseus RepID=A1DR78_CATRO
arahy.69QRE7	127.415	1.55561	1.41087	0.983519	ZH6_S1	0.987791	HB	DNA-binding protein n=1 Tax=Catharanthus roseus RepID=A1DR78_CATRO
Novel03691	0.933909	0.459887	0.189524	0.139885	ZH6_S1	0.507568	--	--
arahy.K2SWWG	153.297	0.706239	0.250223	0.3562	ZH6_S1	0.995393	--	kunitz trypsin inhibitor 1
arahy.ZMPK13	0.895909	0	0.093175	0.261345	ZH6_S1	0.70829	--	Sugar transporter SWEET n=3 Tax=Citrus RepID=V4TK53_9ROSI
arahy.8Y4PDX	20.6866	1.98821	2.15749	2.35636	ZH6_S1	0.886092	--	beta glucosidase 17
arahy.WE07RT	1.09515	0.172646	0.231362	0	ZH6_S1	0.788739	--	cysteine-rich receptor-like protein kinase 2-like isoform X1 [Glycine max]
arahy.GLEC2S	5.97897	2.89889	1.8876	1.34655	ZH6_S1	0.515152	--	mitochondrial substrate carrier family protein B-like [Glycine max]
arahy.9PT08I	3.95072	0.0582932	0.0464961	0.0514774	ZH6_S1	0.985245	--	L-ascorbate oxidase [Glycine max]
arahy.AD2HDF	18.0002	0	0	0	ZH6_S1	1	--	SAUR-like auxin-responsive protein family
arahy.M1C18U	0.36474	0	0	0	ZH6_S1	1	--	chalcone synthase [Glycine max]
arahy.1X72NK	4.00927	0	0	0	ZH6_S1	1	--	D-arabinono-1,4-lactone oxidase family protein
arahy.J53S6S	0.314572	0.0249755	0	0	ZH6_S1	0.920605	--	pyridine nucleotide-disulfide oxidoreductase family protein
arahy.9QS057	148.759	33.2607	38.7145	37.6613	ZH6_S1	0.73975	--	Sugar transporter SWEET n=3 Tax=Solanum RepID=M1CBD6_SOLTU
arahy.8015QX	1.65054	0	0	0	ZH6_S1	1	--	probable carboxylesterase 12-like [Glycine max]
arahy.C4VQXX	1.68865	0.748358	0.249482	0.310318	ZH6_S1	0.556831	--	zinc finger CCCH domain-containing protein 48-like isoform X2 [Glycine max]
arahy.CD0F2D	0.326349	0.0708642	0	0.035307	ZH6_S1	0.782857	--	disease resistance protein
arahy.7TZU8P	0.165578	0	0	0	ZH6_S1	1	--	short-chain dehydrogenase reductase 2a-like [Glycine max]
arahy.228WZM	22.7598	10.7702	10.117	7.18668	ZH6_S1	0.52679	--	O-fucosyltransferase family protein
arahy.W5FEYZ	5.92482	0.275748	0.187547	0	ZH6_S1	0.953459	--	GDSL-like Lipase/Acylhydrolase superfamily protein
arahy.CECC7V	5.55808	1.18929	0.976504	0.195724	ZH6_S1	0.786025	--	endo-1,3
arahy.RCMT0A	0.29426	0.0162437	0	0	ZH6_S1	0.944798	--	transmembrane amino acid transporter family protein
arahy.YRN4PU	3.86862	0.251073	0.222941	0.023876	ZH6_S1	0.9351	--	external alternative NAD(P)H-ubiquinone oxidoreductase B2, mitochondrial-like isoform X1 [Glycine max]
arahy.X5SRIL	157.531	4.39653	14.8839	2.89225	ZH6_S1	0.905518	--	acyl-CoA-binding protein 6
arahy.C7YTVY	0.683935	0.118062	0.0312795	0	ZH6_S1	0.827378	--	FAD/NAD(P)-binding oxidoreductase family protein
arahy.00JV9G	49.5787	5.21836	1.15721	0.266311	ZH6_S1	0.894746	bHLH	transcription factor PIF3-like [Glycine max]
arahy.P7R2PY	1.6525	0	0	0	ZH6_S1	1	--	Peroxidase superfamily protein
arahy.HIWA31	10.3223	4.61474	4.64324	2.75934	ZH6_S1	0.550172	--	protein kinase family protein
arahy.V0ZW9L	0.118219	0	0	0	ZH6_S1	1	--	NEP1-interacting protein 2-like [Glycine max]
arahy.X978JA	8.61027	2.92551	2.93777	1.57729	ZH6_S1	0.658806	--	Protein kinase superfamily protein
arahy.92IF5I	26.5644	3.33067	2.42967	1.03056	ZH6_S1	0.874619	--	Unknown protein
arahy.XWZQ7T	18.5628	7.59933	5.26564	3.17013	ZH6_S1	0.590614	--	Transducin/WD40 repeat-like superfamily protein
arahy.XIU4QN	5.2818	0	0	0.122077	ZH6_S1	0.976887	--	IAA-amino acid hydrolase ILR1-like 4-like [Glycine max]
arahy.BVQE0A	0.561975	0.0978132	0.0682055	0.039979	ZH6_S1	0.825947	--	receptor-like serine/threonine kinase 2
arahy.E6VM83	44.0062	2.5776	1.70971	1.11818	ZH6_S1	0.941426	--	actin 1
arahy.LS23Q4	6.47277	0.113144	0.132276	0.054918	ZH6_S1	0.979564	--	polygalacturonase 4
arahy.PY7LAP	8.22163	0.333727	0.117169	0.251723	ZH6_S1	0.959409	--	Haloacid dehalogenase-like hydrolase (HAD) superfamily protein
arahy.LAWA8U	0.100596	0	0	0	ZH6_S1	1	--	sugar porter (SP) family MFS transporter
Novel00001	0.172415	0.0275373	0.029183	0	ZH6_S1	0.83074	--	--
arahy.JCHF8R	3.77822	0.116933	0.117167	0.0639949	ZH6_S1	0.968989	bHLH	transcription factor bHLH130-like [Glycine max]
arahy.II0HQF	23.9663	10.951	6.2331	2.48923	ZH6_S1	0.543065	--	Unknown protein
arahy.M3AF87	2.39464	0	0	0	ZH6_S1	1	--	protein IDA-LIKE 2-like [Glycine max]
arahy.3RGS9M	11.8497	0.0439481	0	0	ZH6_S1	0.996291	--	Cytochrome P450 superfamily protein
arahy.GETR6D	15.7369	1.21028	0.977703	0.811774	ZH6_S1	0.923093	--	Protein phosphatase 2C family protein
arahy.VVHX2K	0.827602	0.153331	0.0325906	0	ZH6_S1	0.814728	--	mitochondrial phosphate carrier protein 3, mitochondrial-like [Glycine max]
Novel03022	0.557799	0	0.0888592	0	ZH6_S1	0.840697	--	--
arahy.G65HTE	100.139	50.0519	40.5	24.4881	ZH6_S1	0.500175	--	delta(24)-sterol reductase-like protein
arahy.8447Y8	0.836191	0.154383	0.132806	0.157592	ZH6_S1	0.811536	TF	transcription factor bHLH130-like isoform X4 [Glycine max]
arahy.FKJ1CZ	10.0911	0.58974	0.259162	0.069796	ZH6_S1	0.941559	--	Protein kinase superfamily protein
arahy.V16S4V	0.109235	0	0	0	ZH6_S1	1	--	UDP-Glycosyltransferase superfamily protein
arahy.I5G2IR	1.02624	0.0139557	0.12128	0.0935455	ZH6_S1	0.881821	C2H2	protein TRANSPARENT TESTA 1-like [Glycine max]
arahy.4NL1XF	4.41157	0.752686	0.0693328	0	ZH6_S1	0.829384	--	Calcium-binding EF-hand family protein
Novel02280	0.842344	0.0759831	0.236866	0.259457	ZH6_S1	0.691982	--	--
arahy.QK4PF2	53.2614	0.656889	0.0889318	0	ZH6_S1	0.987667	--	fatty acyl-CoA reductase 3-like [Glycine max]
arahy.BZ5ZMX	5.21442	0.454268	0.140509	0.0993311	ZH6_S1	0.912882	--	sulfate transporter 1
arahy.SU6N3B	0.459573	0.0256571	0	0	ZH6_S1	0.944172	MYB	myb transcription factor
arahy.H93UBA	1.71993	0	0	0	ZH6_S1	1	--	late embryogenesis abundant protein
Novel00865	6.65457	2.28458	2.83934	2.32463	ZH6_S1	0.573325	--	--
arahy.2GZ91X	2.95201	0	0	0	ZH6_S1	1	--	Pleckstrin homology (PH) domain-containing protein / lipid-binding START domain-containing protein
arahy.7G2X2W	2.18039	0.734301	0.169664	0.0289582	ZH6_S1	0.663224	--	RAB GTPase activator protein n=11 Tax=Brassicaceae RepID=B3H765_ARATH
arahy.06QKUB	0.105209	0	0	0	ZH6_S1	1	--	chilling-induced protein, putative
arahy.P1GWNH	10.5325	3.68308	2.42376	2.16843	ZH6_S1	0.650313	--	F-box protein At2g27310-like isoform X1 [Glycine max]
arahy.T4HC5L	69.5866	0.86828	0.861323	0.696114	ZH6_S1	0.987522	--	glucomannan 4-beta-mannosyltransferase 9-like [Glycine max]
arahy.V8VQR4	42.1693	0	0	0	ZH6_S1	1	--	SAUR-like auxin-responsive protein family
arahy.TS08QV	0.721	0	0	0	ZH6_S1	1	--	unknown protein
arahy.P1TNN8	0.225811	0	0	0	ZH6_S1	1	--	putative pectinesterase/pectinesterase inhibitor 24-like [Glycine max]
arahy.DTC7Y5	1.98402	0.227389	0.207789	0.0796351	ZH6_S1	0.885389	--	receptor-like protein kinase 2
arahy.68M7RQ	0.243127	0	0	0	ZH6_S1	1	--	plasma membrane intrinsic protein 1
arahy.E6VW7Q	3.24975	0	0	0	ZH6_S1	1	--	cysteine proteinase inhibitor 5 [Glycine max]
arahy.2U0JEX	3.85054	0.317709	0.79773	0.347446	ZH6_S1	0.792827	--	UDP-Glycosyltransferase superfamily protein
arahy.3U4A0B	42.3066	12.024	5.74798	2.19328	ZH6_S1	0.71579	--	annexin 5
arahy.C255DP	0.853413	0.135668	0.105728	0	ZH6_S1	0.841029	--	LRR and NB-ARC domain disease resistance protein
arahy.14EYW3	2.70349	0.060215	0	0	ZH6_S1	0.977727	--	putative pectinesterase/pectinesterase inhibitor 45-like [Glycine max]
arahy.NQRV4U	2.48806	0.750338	0.354278	0.554305	ZH6_S1	0.698425	--	Protein kinase superfamily protein
arahy.338KFG	7.14723	0.0679619	0.10593	0	ZH6_S1	0.985179	--	Cysteine/Histidine-rich C1 domain family protein
arahy.V14QW9	0.622489	0.16086	0.0151887	0.0504479	ZH6_S1	0.741586	--	Exonuclease, DNA polymerase III, epsilon subunit n=1 Tax=Eubacterium sp. 14-2 RepID=S0IXM4_9FIRM
Novel01051	0.267735	0.0980317	0.0266904	0	ZH6_S1	0.633848	--	--
arahy.J3JZ4F	6.5127	0	0	0	ZH6_S1	1	--	purple acid phosphatase 27
arahy.XE555B	5.06901	0	0	0	ZH6_S1	1	--	Protein kinase superfamily protein
arahy.S6UD8T	0.578568	0.0230667	0.110249	0	ZH6_S1	0.809446	--	serine/threonine protein phosphatase 2A
Novel01681	0.116285	0	0	0	ZH6_S1	1	--	--
arahy.79WGU4	9.23389	4.54266	3.7703	2.35882	ZH6_S1	0.508045	--	phosphoinositide phospholipase C 6-like [Glycine max]
arahy.2RD29A	10.3448	0.0287714	0	0	ZH6_S1	0.997219	--	probable galacturonosyltransferase-like 4-like [Glycine max]
arahy.HGQ0MH	26.9223	6.27065	8.23113	6.29228	ZH6_S1	0.694263	--	probable xyloglucan glycosyltransferase 12-like [Glycine max]
arahy.MGTU20	6.82839	0.0672258	0	0	ZH6_S1	0.990155	--	Calcium-dependent lipid-binding (CaLB domain) family protein
arahy.X1DC6B	0.343385	0	0.100613	0	ZH6_S1	0.706996	--	pectinesterase 11
arahy.42BGRN	0.226379	0	0	0	ZH6_S1	1	--	1-aminocyclopropane-1-carboxylate oxidase
arahy.QNNT5D	10.368	2.27068	0.862524	0	ZH6_S1	0.780991	--	Folic acid and derivative biosynthetic process isoform 1 n=1 Tax=Theobroma cacao RepID=UPI00042B7F04
arahy.5KS94B	2.40578	0.596942	0.575099	0.656206	ZH6_S1	0.727238	--	uncharacterized protein At5g41620-like [Glycine max]
arahy.RHK7Y5	0.127087	0	0	0	ZH6_S1	1	--	Peptidoglycan-binding LysM domain-containing protein
arahy.R7GC1L	1.01833	0.0181525	0.0236636	0	ZH6_S1	0.976762	--	UDP-Glycosyltransferase superfamily protein
arahy.E1RKLH	1.70114	0.568486	0.102668	0.0219905	ZH6_S1	0.66582	--	ATP-binding ABC transporter
arahy.Q9WPYW	39.1594	0.481601	0	0.812457	ZH6_S1	0.979253	--	SAUR-like auxin-responsive protein family
arahy.D01JRP	23.9981	3.90953	2.89266	0.998206	ZH6_S1	0.83709	--	Protein of Unknown Function (DUF239)
arahy.EVYE6S	0.402845	0.0290128	0	0	ZH6_S1	0.92798	--	ATP-binding/protein serine/threonine kinase [Glycine max]
Novel04621	6.37653	0.226118	0.0979972	0	ZH6_S1	0.964539	--	--
arahy.T11BLV	1.46779	0.108929	0	0.157888	ZH6_S1	0.892431	--	exocyst subunit exo70 family protein B1
arahy.S726NC	9.26011	2.71324	1.18444	1.24222	ZH6_S1	0.706997	--	FAD/NAD(P)-binding oxidoreductase family protein
arahy.RZ4SVU	43.6023	4.61047	2.59488	1.79605	ZH6_S1	0.894261	--	HAD superfamily, subfamily IIIB acid phosphatase
arahy.4KG7L9	12.6547	0.395135	0.612978	0	ZH6_S1	0.951561	--	WD repeat-containing protein 5-like [Glycine max]
arahy.MGR2S5	39.858	14.2539	10.672	4.21146	ZH6_S1	0.642383	--	protein WEAK CHLOROPLAST MOVEMENT UNDER BLUE LIGHT 1-like [Glycine max]
arahy.3VR7C0	12.3367	3.12957	1.27738	0.953231	ZH6_S1	0.746319	--	glucan endo-1,3-beta-glucosidase 8-like [Glycine max]
Novel04482	0.178743	0	0.0186179	0	ZH6_S1	0.89584	--	--
Novel02300	0.689923	0.263231	0.196491	0.0631494	ZH6_S1	0.618463	--	--
arahy.C3I2PC	0.386689	0.103777	0.0133507	0	ZH6_S1	0.731625	--	beta-amylase 6
arahy.D9P3QC	1.80181	0	0	0	ZH6_S1	1	MYB	myb transcription factor
arahy.Q2MK8D	0.763983	0.0312676	0.0607458	0	ZH6_S1	0.920488	--	adenylate kinase 1
arahy.JGWU85	2.98125	0.190558	0.264609	0.131572	ZH6_S1	0.911242	--	calcium-transporting ATPase 2, plasma membrane-type protein
arahy.A8YTMR	15.6021	0.526862	0.343875	0.0260866	ZH6_S1	0.966231	--	tryptophan synthase beta chain
arahy.ST1ALI	32.6535	9.74717	10.1448	5.01532	ZH6_S1	0.68932	--	4-coumarate:CoA ligase 2
arahy.8Q9000	529.617	97.863	50.7956	20.7779	ZH6_S1	0.815219	--	soluble inorganic pyrophosphatase
arahy.4TST71	0.974168	0	0	0	ZH6_S1	1	WRKY	probable WRKY transcription factor 70-like [Glycine max]
arahy.E8J0ZS	0.136013	0	0	0	ZH6_S1	1	--	Cytochrome P450 superfamily protein
arahy.0Y1AJC	12.633	5.22319	3.68339	2.77988	ZH6_S1	0.586544	--	putative ribonuclease H protein At1g65750-like isoform X4 [Glycine max]
arahy.TPIF41	48.5906	14.9805	6.45634	3.7974	ZH6_S1	0.6917	bHLH	basic helix-loop-helix (bHLH) DNA-binding superfamily protein
arahy.N584HR	0.105707	0	0	0	ZH6_S1	1	--	NADH-ubiquinone oxidoreductase chain 6 n=31 Tax=Magnoliophyta RepID=K7L9U2_SOYBN
arahy.JF7ZHE	8.43075	0.133218	0.39673	0.268053	ZH6_S1	0.952942	--	cinnamoyl coa reductase
arahy.FJRL71	23.2823	10.4197	5.1381	5.71814	ZH6_S1	0.552463	--	HR-like lesion-inducing protein-related
arahy.QYI4M0	5.33487	0.698342	1.63279	1.67914	ZH6_S1	0.685251	--	Unknown protein
arahy.8CC3D4	242.566	1.15513	2.29248	3.13207	ZH6_S1	0.987088	--	Plant invertase/pectin methylesterase inhibitor superfamily protein
arahy.677WAC	1.14607	0.0298298	0	0	ZH6_S1	0.973972	--	MLP-like protein 43
Novel00852	91.7638	1.46452	2.69441	1.81362	ZH6_S1	0.970638	--	--
arahy.SE7DCN	0.168519	0	0	0	ZH6_S1	1	--	Unknown protein
Novel03435	0.120784	0.0418204	0	0	ZH6_S1	0.653759	--	--
arahy.RQMB8Y	13.7411	3.20703	2.27032	1.51719	ZH6_S1	0.76661	--	filament-like plant protein 7-like isoform X1 [Glycine max]
arahy.B783NX	2.17919	0	0	0	ZH6_S1	1	--	general regulatory factor 12
arahy.8DE1JP	31.6585	11.6249	4.5816	3.19737	ZH6_S1	0.632804	--	Phosphoglycerate mutase family protein
arahy.G729YX	10.8866	1.48917	1.51114	0.593334	ZH6_S1	0.861192	WRKY	WRKY family transcription factor
arahy.4E7QKU	177.184	15.7168	8.50613	4.65825	ZH6_S1	0.911297	--	Acyl-ACP thioesterase
arahy.WSMZ37	37.489	9.78544	2.09161	0.233142	ZH6_S1	0.738978	--	hypothetical protein
arahy.E8NS3Z	0.118253	0	0	0	ZH6_S1	1	--	chalcone synthase-like [Glycine max]
arahy.445YZY	2.98211	0.256575	0.149347	0.51939	ZH6_S1	0.825831	--	Unknown protein
arahy.NF5K9F	51.5006	10.5897	16.3955	14.9453	ZH6_S1	0.681644	--	GHMP kinase family protein
arahy.06ADV2	0.214923	0	0	0	ZH6_S1	1	--	unknown protein
arahy.GF35LS	401.112	93.9249	50.8737	38.8772	ZH6_S1	0.765839	--	thioredoxin 2
arahy.82L1EP	16.9819	2.77455	2.36299	1.87034	ZH6_S1	0.836617	--	Chalcone-flavanone isomerase family protein
arahy.J0213X	0.229508	0.0779318	0.105544	0	ZH6_S1	0.540128	--	photosystem I P700 chlorophyll A apoprotein
arahy.W7Q4YE	1.58731	0.0944071	0.0669286	0	ZH6_S1	0.940524	--	Peroxidase superfamily protein
arahy.ABE34K	1.97923	0.827574	0.119618	0	ZH6_S1	0.581871	--	transmembrane protein, putative
arahy.QG8K35	0.536216	0.250999	0.131273	0.0448125	ZH6_S1	0.531908	--	Cytochrome P450 superfamily protein
arahy.UV5URX	0.776211	0.0235223	0	0	ZH6_S1	0.969696	--	Sec14p-like phosphatidylinositol transfer family protein
arahy.NHE1TC	30.5528	9.22742	6.33139	6.9226	ZH6_S1	0.697985	--	Integral membrane Yip1 family protein
arahy.F8Q1RV	18.5516	3.20725	1.86971	1.02826	ZH6_S1	0.827117	--	BTB/POZ domain-containing protein [Glycine max]
arahy.1KM4NQ	2.22552	0.0708326	0.0582046	0.072502	ZH6_S1	0.967423	TF	MYB transcription factor MYB48 [Glycine max]
arahy.E3E88W	1.57156	0.0237032	0.0251198	0.0457318	ZH6_S1	0.9709	MYB	myb transcription factor
arahy.R5AJY0	4.80687	0.557918	1.62501	1.50529	ZH6_S1	0.66194	--	calcium and calcium/calmodulin-dependent serine/threonine-protein kinase [Glycine max]
arahy.11XWIC	43.5585	0.0939633	0.0183562	0.121937	ZH6_S1	0.997201	--	Ras-related small GTP-binding family protein
arahy.ZCM31M	0.282267	0	0.102691	0	ZH6_S1	0.636192	--	short-chain dehydrogenase/reductase
arahy.908IX6	0.139589	0	0.0145395	0	ZH6_S1	0.89584	--	disease resistance protein (TIR-NBS-LRR class), putative
arahy.Y6CTQQ	0.462235	0.0208754	0	0	ZH6_S1	0.954838	--	C-CAP/cofactor C-like domain-containing protein
arahy.XN9UYN	0.821663	0.119874	0.241894	0.248762	ZH6_S1	0.697246	--	uncharacterized protein LOC100812281 isoform X2 [Glycine max]
arahy.03H74W	0.262135	0.0861867	0.0956467	0	ZH6_S1	0.635125	--	Protein kinase superfamily protein
arahy.D00LME	16.1777	2.69991	1.37165	1.80606	ZH6_S1	0.833109	--	RS21-C6, EAR, NTP pyrophosphohydrolase MazG catalytic core, putative n=1 Tax=Theobroma cacao RepID=UPI00042B6F4E
arahy.8MB9CM	3.66577	1.32707	1.02281	0.0317412	ZH6_S1	0.637983	--	Protein phosphatase 2C family protein
arahy.PK2PPV	0.358278	0.109093	0	0	ZH6_S1	0.695508	--	metalloendoproteinase 1-like [Glycine max]
arahy.RN5M7S	1.93208	0.576511	0.700854	0.558483	ZH6_S1	0.637255	--	protein XRI1-like isoform X3 [Glycine max]
arahy.ZFC78D	56.7619	1.66114	1.36221	0.309376	ZH6_S1	0.970735	--	FAD-binding Berberine family protein
arahy.740L49	23.35	11.0918	9.85673	8.68189	ZH6_S1	0.524978	--	Protein kinase superfamily protein
arahy.JMNW81	47.9244	18.7574	10.7356	7.48438	ZH6_S1	0.608604	--	Cytochrome C1 family
arahy.7CP98C	5.35042	0.58748	0.556287	0.594597	ZH6_S1	0.888869	--	uncharacterized protein LOC100811424 isoform X9 [Glycine max]
arahy.QP6ZVD	0.143446	0	0	0	ZH6_S1	1	--	RAC-like GTP binding protein 5
arahy.7FR3FQ	0.218343	0	0	0.03982	ZH6_S1	0.817626	--	GDSL-like Lipase/Acylhydrolase superfamily protein
arahy.R435H3	0.208802	0	0	0	ZH6_S1	1	--	Unknown protein
arahy.2B1HMX	0.176677	0.0509249	0	0	ZH6_S1	0.711763	--	Lipid transfer protein
arahy.7YIN0X	18.9987	7.90549	1.16462	0	ZH6_S1	0.583894	--	Peroxidase superfamily protein
arahy.8N8EX2	17.2603	4.8216	2.84108	1.77074	ZH6_S1	0.720654	TF	transcription initiation factor IIE (TFIIE) alpha subunit family protein / general transcription factor TFIIE family protein
arahy.04JNDX	65.713	1.70463	7.57607	1.98755	ZH6_S1	0.88471	MYB	MYB transcription factor MYB51 [Glycine max]
arahy.IH6TUL	196.449	58.2535	27.7963	13.8786	ZH6_S1	0.703468	--	Ubiquinol-cytochrome c reductase complex protein n=2 Tax=Papilionoideae RepID=G7L638_MEDTR
arahy.4QQ966	0.144215	0	0	0	ZH6_S1	1	--	glutamate decarboxylase
arahy.1SK5MK	2.55467	0	0.0280548	0.051075	ZH6_S1	0.980007	bHLH	transcription factor BEE 1-like [Glycine max]
arahy.1SN7TU	54.2716	9.36658	7.61752	1.77406	ZH6_S1	0.827413	--	plasma membrane intrinsic protein 1
arahy.FAE047	0.565645	0.0651507	0.0849304	0	ZH6_S1	0.849852	--	Unknown protein
arahy.50NG3N	29.8707	13.9699	6.64339	6.78105	ZH6_S1	0.53232	--	SEC1 family transport protein SLY1-like [Glycine max]
Novel01043	0.630382	0	0.0487763	0.169802	ZH6_S1	0.730635	--	--
arahy.PT3XB5	0.64712	0	0	0	ZH6_S1	1	--	WD repeat-containing protein 44-like [Glycine max]
arahy.9Z6I10	30.6398	11.2016	4.69078	2.43935	ZH6_S1	0.63441	--	Bifunctional inhibitor/lipid-transfer protein/seed storage 2S albumin superfamily protein
arahy.3U8Q93	0.123342	0.0165131	0	0	ZH6_S1	0.866119	--	protein YLS7-like [Glycine max]
arahy.ZG7I69	1.40757	0	0	0.0624427	ZH6_S1	0.955638	--	Protein kinase superfamily protein
arahy.RT9W1M	86.1108	28.2082	28.4641	20.2356	ZH6_S1	0.669448	--	hypothetical protein
arahy.VGZ3RK	3.22484	0.48691	0.0879474	0.0282563	ZH6_S1	0.849013	--	enhanced disease susceptibility protein
Novel02787	12.2326	0.817601	1.6555	1.55806	ZH6_S1	0.864666	--	--
arahy.BUDB0A	1.89633	0.025572	0	0.0493372	ZH6_S1	0.973983	--	12-oxophytodienoate reductase 1
arahy.23ZMCQ	0.483993	0.0799695	0.13031	0	ZH6_S1	0.73076	--	NAC domain protein,
arahy.GLLM5N	5.616	0.571916	0.183948	0	ZH6_S1	0.898163	--	18.5 kDa class I heat shock protein [Glycine max]
arahy.Y3EBK0	7.56368	2.88856	1.11591	0.846626	ZH6_S1	0.618101	--	hydroxyproline-rich glycoprotein family protein
arahy.EJ39VB	3.77797	0.0357353	0	0	ZH6_S1	0.990541	--	short-chain dehydrogenase-reductase B
arahy.V2YWYI	19.3225	0.277845	0.200035	0.630348	ZH6_S1	0.967378	HB	homeobox protein knotted-1-like 6-like [Glycine max]
arahy.T3ZD5B	5.04838	2.40409	1.80817	1.10862	ZH6_S1	0.523791	--	Eukaryotic aspartyl protease family protein
arahy.H66Y7T	0.295842	0.0912049	0	0.0313562	ZH6_S1	0.69171	--	receptor-like protein kinase 2
arahy.5EDI0X	0.186967	0	0.0215977	0	ZH6_S1	0.884484	--	Cytochrome P450 superfamily protein
arahy.RRC04T	5.37271	0	0.103694	0	ZH6_S1	0.9807	--	respiratory burst oxidase homolog B
arahy.QV24KU	18.4486	6.41542	1.20104	0.165694	ZH6_S1	0.652255	--	O-acyltransferase (WSD1-like) family protein
arahy.P83Y1M	15.8328	4.5599	3.01799	2.50828	ZH6_S1	0.711996	--	Transducin/WD40 repeat-like superfamily protein
arahy.F25ZWM	0.70528	0.0810694	0	0	ZH6_S1	0.885054	--	unknown protein
arahy.HS0XS6	0.454206	0	0	0	ZH6_S1	1	--	terpene synthase family, metal-binding domain protein
arahy.4BBW7G	0.550695	0.0252525	0.0438921	0.179792	ZH6_S1	0.673518	--	cysteine-rich receptor-kinase-like protein
Novel01260	18.5082	6.87073	1.17719	0	ZH6_S1	0.628773	--	--
arahy.X7S7J8	37.6284	1.15065	1.04476	0.396798	ZH6_S1	0.969421	--	Avr9/Cf-9 rapidly elicited protein
arahy.TI8HRK	54.4117	10.2892	7.18215	17.6506	ZH6_S1	0.675611	--	maternal effect embryo arrest 59
arahy.AXGL4F	1.14546	0.559602	0.385009	0	ZH6_S1	0.511462	--	protein HAPLESS 2-like [Glycine max]
arahy.54Q5ZL	7.6994	1.48655	2.07867	1.31118	ZH6_S1	0.730022	Orphans	Signal transduction histidine kinase
arahy.5JBK01	30.1377	0	0.0271227	0	ZH6_S1	0.9991	bHLH	transcription factor BEE 3-like [Glycine max]
arahy.R1Y5X8	5.06725	0.507119	0.550482	0.49868	ZH6_S1	0.891365	--	SAUR-like auxin-responsive protein family
arahy.NWTA0X	1051.24	35.094	8.89173	0.509216	ZH6_S1	0.966616	--	disease-resistance response protein
arahy.ZCS8HC	0.129774	0.0391413	0	0	ZH6_S1	0.698389	--	Actin-binding FH2 (Formin Homology) protein
arahy.IT02W3	10.6398	2.12018	1.02937	0.532906	ZH6_S1	0.800732	--	nitrate transporter 1.7
arahy.IQLC9A	0.564089	0	0.0684007	0	ZH6_S1	0.878741	--	probable 2-oxoglutarate/Fe(II)-dependent dioxygenase-like [Glycine max]
arahy.2PCK9I	0.828564	0.0348245	0.0151324	0.0502609	ZH6_S1	0.93934	--	probable BOI-related E3 ubiquitin-protein ligase 3-like [Glycine max]
arahy.ZBAY9J	20.3552	8.69114	9.27158	8.28438	ZH6_S1	0.54451	HB	DNA-binding protein n=1 Tax=Catharanthus roseus RepID=A1DR78_CATRO
arahy.98Q0CB	0.139223	0.00803414	0.0104733	0	ZH6_S1	0.924773	--	receptor-like serine/threonine kinase 2
arahy.FTDL1P	9.77095	3.63812	3.78132	2.13392	ZH6_S1	0.613004	--	trehalose phosphate synthase
arahy.XP1L1V	2.65974	1.22957	0.582578	0.474899	ZH6_S1	0.53771	--	beta glucosidase 11
arahy.30MQ01	21.1042	0	0	0	ZH6_S1	1	--	specific tissue protein
arahy.WH3GKX	0.895903	0.19936	0	0	ZH6_S1	0.777475	--	Mitochondrial protein, putative n=1 Tax=Medicago truncatula RepID=G7I9T8_MEDTR
arahy.DIS46Y	85.2488	31.837	19.3577	11.3403	ZH6_S1	0.62654	--	tubulin beta-1 chain
Novel03584	29.9609	11.8346	6.29638	6.832	ZH6_S1	0.604997	--	--
arahy.SAFK3A	23.928	2.71429	0.84184	0.215294	ZH6_S1	0.886564	--	UDP-D-glucose/UDP-D-galactose 4-epimerase 5
arahy.T8W31W	46.7763	4.15914	20.9411	23.1203	ZH6_S1	0.505726	--	Remorin family protein
arahy.7YN7DY	3.25987	0.104664	0	0.0265289	ZH6_S1	0.967893	--	CBS domain-containing protein CBSCBSPB1-like isoform X4 [Glycine max]
arahy.YW30D2	157.603	26.5777	10.2176	3.7777	ZH6_S1	0.831363	--	3-ketoacyl-CoA synthase 10
arahy.ARK2IX	0.361852	0.0339437	0	0	ZH6_S1	0.906195	--	DUF309 domain protein
arahy.DB50AT	31.7279	10.0655	6.11509	3.37309	ZH6_S1	0.682757	--	C2H2-like zinc finger protein
arahy.RIH8EG	11.0049	3.88674	2.49007	2.73799	ZH6_S1	0.646816	--	trehalose phosphate synthase
arahy.ESZ0IC	0.387113	0.0128661	0	0	ZH6_S1	0.966764	--	laccase 12
arahy.TPH81X	42.3271	5.06772	4.69773	3.99516	ZH6_S1	0.880272	--	Core-2/I-branching beta-1,6-N-acetylglucosaminyltransferase family protein
arahy.I2EZUU	72.0943	18.266	9.24169	5.24469	ZH6_S1	0.746637	BES1	BES1/BZR1 homolog protein 4-like [Glycine max]
arahy.23D8N6	33.5098	10.6793	10.2044	7.41282	ZH6_S1	0.681308	--	transmembrane protein 184A-like [Glycine max]
arahy.9CLT74	0.869341	0.104362	0.0748703	0	ZH6_S1	0.879953	--	nodulin MtN21 /EamA-like transporter family protein
arahy.46KP2H	91.5197	33.4193	16.1767	15.3068	ZH6_S1	0.634841	SBP	squamosa promoter binding protein-like 1
arahy.CQFZ3U	0.63283	0.139676	0.0466511	0.239878	ZH6_S1	0.620945	--	alcohol dehydrogenase 1
arahy.H47VCY	12.843	4.42023	2.93804	2.52227	ZH6_S1	0.655824	--	cyclic nucleotide-gated ion channel-like protein
arahy.51KF0F	62.0686	5.92093	23.1586	29.8105	ZH6_S1	0.519717	--	GRAM domain-containing protein / ABA-responsive protein-related
arahy.H0HG5X	2.95561	0.774756	0.7481	0.577025	ZH6_S1	0.737869	--	Unknown protein
arahy.A1VWSL	1.561	0.314518	0.191938	0.0616968	ZH6_S1	0.798514	NAC	NAC domain containing protein 36
arahy.MDY1G5	1.24967	0.427678	0.15195	0.0436821	ZH6_S1	0.657768	--	Protein kinase superfamily protein
Novel01108	0.635254	0.129491	0.0722472	0	ZH6_S1	0.796159	--	--
arahy.CA7N65	21.9991	0.0224466	0.0780234	0	ZH6_S1	0.996453	--	Cysteine proteinases superfamily protein
arahy.FJSG30	0.876839	0	0	0	ZH6_S1	1	--	uncharacterized protein At1g66480-like [Glycine max]
arahy.PEHM2U	0.190683	0	0	0	ZH6_S1	1	--	uncharacterized protein LOC100820285 isoform X2 [Glycine max]
arahy.153R27	0.72297	0.0815191	0	0	ZH6_S1	0.887244	TF	K-box region and MADS-box transcription factor family protein
arahy.EY0R4L	3.66088	0.862253	1.07438	0.636655	ZH6_S1	0.706524	--	auxin response factor 4
arahy.K1D1LI	2.32041	0.0829463	0	0	ZH6_S1	0.964254	--	Hemerythrin class glutathione S-transferase n=1 Tax=Physcomitrella patens subsp. patens RepID=A9RED4_PHYPA
arahy.I21QA9	8.97391	3.53752	3.16577	3.10674	ZH6_S1	0.605799	--	xanthine dehydrogenase 1
Novel02657	3.17085	0.543786	0.621194	0.477469	ZH6_S1	0.804092	--	--
arahy.ZI8BLB	0.118219	0	0	0	ZH6_S1	1	--	Ankyrin repeat family protein
arahy.BM19ED	2.53324	0.767643	0.814436	0.384648	ZH6_S1	0.6785	--	F-box/RNI-like superfamily protein
arahy.TC7Y0P	1.91482	0.0247779	0	0	ZH6_S1	0.98706	WRKY	WRKY family transcription factor
arahy.5HY3IZ	24.8117	3.26925	10.4219	11.773	ZH6_S1	0.525506	--	GRAM domain-containing protein / ABA-responsive protein-related
arahy.HDD96J	0.248097	0.0110015	0.0143416	0	ZH6_S1	0.942194	--	receptor kinase 1
arahy.56Z1DA	3.34109	0.514446	0.287485	0.647899	ZH6_S1	0.806082	--	Cyclopropane-fatty-acyl-phospholipid synthase
Novel00115	3.11662	0.0235658	0	0	ZH6_S1	0.992439	--	--
arahy.PE002R	4.9125	1.75725	2.27806	1.78301	ZH6_S1	0.536273	--	protein YLS7-like [Glycine max]
arahy.3DZG8W	1.32161	0.0145557	0	0	ZH6_S1	0.988986	--	chalcone synthase [Glycine max]
arahy.EJ828S	15.6196	2.04726	0.683828	0.292651	ZH6_S1	0.868931	--	clathrin interactor EPSIN 2-like [Glycine max]
arahy.X8Y7H8	25.304	8.286	2.31184	3.64263	ZH6_S1	0.672541	--	cell number regulator 8-like [Glycine max]
arahy.05RLXM	32.3125	15.1886	5.19406	4.95861	ZH6_S1	0.529949	--	cell number regulator 8-like [Glycine max]
arahy.2B715G	0.39726	0	0	0	ZH6_S1	1	--	unknown protein
arahy.4P3DQS	0.846305	0.0636336	0	0	ZH6_S1	0.92481	--	Cell wall protein Exp1 n=1 Tax=Mirabilis jalapa RepID=Q84L36_MIRJA
arahy.0RIH3A	6.04257	1.82886	0.860912	1.06358	ZH6_S1	0.697338	--	sulfate transporter 1
arahy.0CQJ15	10.1739	0	0.265913	0	ZH6_S1	0.973863	--	2-oxoglutarate (2OG) and Fe(II)-dependent oxygenase superfamily protein
arahy.CGG9UY	0.127674	0	0	0	ZH6_S1	1	--	Unknown protein
arahy.6T97B7	0.950548	0	0.0448568	0.115326	ZH6_S1	0.878675	--	chitinase A
arahy.6B39MA	17.9873	4.69924	3.0229	2.37106	ZH6_S1	0.738747	ARF	auxin response factor 19
arahy.RY0HX3	15.3845	6.55725	3.55917	2.32883	ZH6_S1	0.573775	--	Galactosyltransferase family protein
arahy.BG7UA0	25.2943	5.30304	2.01004	1.18994	ZH6_S1	0.790346	--	arabinose 5-phosphate isomerase, putative
arahy.VJAP74	0.171078	0.0471543	0	0	ZH6_S1	0.724369	--	uncharacterized protein LOC100815851 [Glycine max]
arahy.FCYU2S	6.76427	0.967163	0.51465	0.498885	ZH6_S1	0.857019	--	transmembrane protein, putative
arahy.1EJ222	114.91	6.21952	1.85034	0.637851	ZH6_S1	0.945875	--	uncharacterized protein LOC102663882 [Glycine max]
arahy.QT21HW	0.12781	0	0	0	ZH6_S1	1	--	Protein kinase superfamily protein
arahy.0452KN	1.58478	0.071984	0.187677	0.170837	ZH6_S1	0.881576	--	hypothetical protein
Novel00512	0.569523	0.0161096	0	0.0382323	ZH6_S1	0.93287	--	--
arahy.3K2ECI	0.950079	0.0255617	0.0333222	0	ZH6_S1	0.964927	--	Unknown protein
arahy.K5MJK0	91.1912	4.0663	4.04294	0.973859	ZH6_S1	0.955409	--	2,3-diketo-5-methylthio-1-phosphopentane phosphatase
arahy.HZGV61	1.15034	0.0793948	0.33773	0.03843	ZH6_S1	0.706407	--	receptor-like protein kinase 4
arahy.2A5IMX	0.577506	0	0	0	ZH6_S1	1	--	ser/thr-rich protein T10 in DGCR region-like protein
arahy.3AGG5H	1.18334	0	0.0900434	0	ZH6_S1	0.923907	--	Unknown protein
arahy.78NDKC	3.5149	0	0.0850841	0.0663889	ZH6_S1	0.975793	--	ATP-binding/protein serine/threonine kinase [Glycine max]
arahy.L6BRZU	0.356321	0.175746	0	0	ZH6_S1	0.506778	--	Unknown protein
arahy.G1I4C8	110.97	33.3072	30.5043	14.8979	ZH6_S1	0.699855	--	legumin type B-like [Glycine max]
arahy.TS3UXC	0.109955	0	0	0	ZH6_S1	1	--	spermidine hydroxycinnamoyl transferase-like [Glycine max]
arahy.ZP9SCJ	50.1159	17.1454	7.44622	4.53007	ZH6_S1	0.657886	--	HXXXD-type acyl-transferase family protein
arahy.XBHS2W	7.91933	1.52387	1.98976	2.57654	ZH6_S1	0.674651	--	Unknown protein
arahy.TQ6P94	0.264654	0	0	0	ZH6_S1	1	--	uncharacterized protein LOC100810533 isoform X3 [Glycine max]
arahy.PFN41B	84.9794	11.4615	5.34961	2.25889	ZH6_S1	0.865126	--	probable rhamnose biosynthetic enzyme 1-like isoform X2 [Glycine max]
arahy.K32PSG	40.5777	16.2874	5.83093	2.83204	ZH6_S1	0.598611	--	probable glucan endo-1,3-beta-glucosidase A6-like [Glycine max]
arahy.FQAE3D	26.241	11.713	7.87426	5.74158	ZH6_S1	0.553637	--	NC domain-containing protein-related
arahy.47H2HK	7.27117	0	0	0	ZH6_S1	1	--	Unknown protein
arahy.M97CFY	0.423687	0.0476916	0	0	ZH6_S1	0.887437	--	sulfate transporter 1
arahy.G1PS4Z	37.6736	14.6747	12.8487	9.67045	ZH6_S1	0.610477	--	unknown protein
arahy.3F3WIY	0.122445	0	0	0	ZH6_S1	1	--	FKBP-like peptidyl-prolyl cis-trans isomerase family protein
arahy.D5U0A9	4.11879	1.75805	0.22086	0	ZH6_S1	0.573164	--	receptor kinase 2
arahy.2VF8XD	62.8574	23.9385	8.35306	3.92495	ZH6_S1	0.619161	--	arginase
arahy.5S024H	4.92975	2.16854	0.606525	0.126441	ZH6_S1	0.560112	--	beta-hexosaminidase 2
arahy.Z6T6TW	3.62464	0.551114	0.397938	0.744663	ZH6_S1	0.794555	--	putative ferric-chelate reductase 1-like isoform X2 [Glycine max]
Novel00494	7.52424	1.59401	0.447855	0.461566	ZH6_S1	0.78815	--	--
arahy.34WEUP	0.975093	0	0	0	ZH6_S1	1	--	myosin-9-like [Glycine max]
arahy.299G99	45.2584	8.5769	21.9486	13.2331	ZH6_S1	0.515039	--	thioredoxin F2
arahy.Q07BGG	30.4185	4.8131	3.13396	2.69048	ZH6_S1	0.841771	--	Late embryogenesis abundant (LEA) hydroxyproline-rich glycoprotein family
arahy.ZG0GPL	1.29991	0.0183117	0	0	ZH6_S1	0.985913	--	probable 2-oxoglutarate/Fe(II)-dependent dioxygenase-like [Glycine max]
arahy.FN5ZTC	0.974517	0.441048	0.472074	0.348943	ZH6_S1	0.515581	--	WD-40 repeat family protein / beige-related
arahy.FRKN6W	0.78837	0	0.313583	0.261707	ZH6_S1	0.602239	--	polygalacturonase-like [Glycine max]
arahy.3IGY6I	0.521465	0.0262583	0.0456363	0	ZH6_S1	0.912484	--	Tryptophan/tyrosine permease
arahy.E2AMGU	13.0927	0.161054	0.0484147	0	ZH6_S1	0.987699	LOB	LOB domain-containing protein 11
arahy.0ZF8VJ	48.0471	8.91624	14.6103	18.6181	ZH6_S1	0.612504	--	beta-galactosidase 3
arahy.I8XWBG	0.971656	0.135728	0.0187032	0	ZH6_S1	0.860313	--	polygalacturonase 4
arahy.A3V54Z	0.254304	0.083569	0.0593202	0	ZH6_S1	0.671381	--	strictosidine synthase-like 3
arahy.WQLB21	4.36077	2.16399	0.833169	1.04574	ZH6_S1	0.503761	--	probable galacturonosyltransferase 11-like [Glycine max]
arahy.VJ6NUA	321.302	0.330982	0.0667807	0.182366	ZH6_S1	0.99897	--	Gibberellin-regulated family protein
arahy.D7034C	1.34004	0.19587	0	0.0435541	ZH6_S1	0.853833	--	uncharacterized protein At3g49720-like isoform X3 [Glycine max]
arahy.H0A24T	3.23439	1.4334	0.969402	0.735078	ZH6_S1	0.556825	--	receptor-like serine/threonine kinase 2
arahy.FE4WD3	31.6043	9.84491	3.87847	2.83174	ZH6_S1	0.688494	--	Core-2/I-branching beta-1,6-N-acetylglucosaminyltransferase family protein
arahy.I6FI3G	51.0127	3.56548	1.07096	0.815058	ZH6_S1	0.930106	--	Remorin family protein
arahy.2M0S90	0.451438	0.131158	0.0107385	0	ZH6_S1	0.709466	--	ankyrin repeat-containing protein At3g12360-like [Glycine max]
arahy.FGMN08	0.455504	0	0	0	ZH6_S1	1	--	Unknown protein
arahy.8Q6EW7	52.5895	6.20619	5.52662	5.97682	ZH6_S1	0.881988	--	cellulose synthase 6
arahy.7BZL8T	3.18659	0	0	0	ZH6_S1	1	HSF	heat shock transcription factor B4
arahy.6D2G91	23.7542	3.46078	1.35834	0.471322	ZH6_S1	0.854309	--	Cyclopropane-fatty-acyl-phospholipid synthase
arahy.99W7VW	11.7803	2.30621	0.853808	0.371329	ZH6_S1	0.804232	--	BTB/POZ domain-containing protein [Glycine max]
arahy.RUCU71	18.933	7.56778	4.17952	2.08633	ZH6_S1	0.600286	--	Protein kinase superfamily protein
Novel05117	4.6809	1.30003	2.18151	1.35574	ZH6_S1	0.533954	--	--
arahy.TZ3ZMM	11.1018	0	0	0	ZH6_S1	1	MADS	MADS-box transcription factor family protein
Novel00489	0.286399	0.0922484	0	0	ZH6_S1	0.677903	--	--
arahy.1628KP	4.97869	1.87248	0.580596	0.220598	ZH6_S1	0.623901	--	P-loop nucleoside triphosphate hydrolase superfamily protein
Novel05104	2.92978	0.800201	0.220788	0.170298	ZH6_S1	0.726873	--	--
arahy.03P8S0	7.2469	0.118798	0.0507721	0.126487	ZH6_S1	0.982546	--	uncharacterized protein LOC100820443 [Glycine max]
arahy.62I324	3.19222	0.538535	0.137125	0	ZH6_S1	0.831298	--	probable 2-oxoglutarate/Fe(II)-dependent dioxygenase-like [Glycine max]
arahy.Y56548	2.41896	0.169045	0	0	ZH6_S1	0.930117	--	LRR and NB-ARC domain disease resistance protein
arahy.4KJ3L6	2.07989	0.913385	0.600856	0.452156	ZH6_S1	0.56085	--	transferring glycosyl group transferase
arahy.6ULA6T	14.3299	6.92212	3.85402	1.59611	ZH6_S1	0.516946	--	Syntaxin/t-SNARE family protein
Novel02108	2.13823	0.0406663	0.176702	0.0482559	ZH6_S1	0.91736	--	--
arahy.YVF32X	20.491	7.83235	2.94827	1.32189	ZH6_S1	0.617766	--	BTB/POZ domain-containing protein [Glycine max]
arahy.A6C0JM	0.812239	0.0319521	0	0	ZH6_S1	0.960662	--	protein kinase family protein
arahy.MMYB4K	2.2287	0	0	0	ZH6_S1	1	--	Alpha/beta hydrolase related protein
arahy.L6NNIX	8.93343	1.81194	1.11069	1.08309	ZH6_S1	0.797173	--	adiponectin receptor protein 2-like isoform X3 [Glycine max]
arahy.14L1JV	3.16589	0.287288	1.01013	0.481972	ZH6_S1	0.680932	--	heterogeneous nuclear ribonucleoprotein U-like protein 1-like isoform X1 [Glycine max]
arahy.J4S87V	109.682	4.88163	1.30253	0.354551	ZH6_S1	0.955493	--	Water-selective transport intrinsic membrane protein 1 n=1 Tax=Lotus japonicus RepID=Q9LKJ6_LOTJA
arahy.SXC6IH	0.295597	0	0	0	ZH6_S1	1	--	laccase 12
arahy.R33BY8	2.36975	0.473417	0.179809	0.0327375	ZH6_S1	0.800225	--	COP9 signalosome complex subunit-like protein
arahy.ADC2ZV	1.35794	0.0630147	0.378408	0.46496	ZH6_S1	0.657598	--	uncharacterized protein LOC100810027 [Glycine max]
arahy.98TRC1	30.7037	9.10058	8.89919	9.9369	ZH6_S1	0.676361	--	ATP-binding/protein serine/threonine kinase [Glycine max]
arahy.F5PR0Y	8.64985	3.25019	2.6031	2.75964	ZH6_S1	0.624249	--	U-box domain-containing protein 44-like [Glycine max]
arahy.AQ4HSR	8.4939	2.28372	1.71134	1.21969	ZH6_S1	0.731135	--	hydroxymethylglutaryl-CoA lyase
arahy.VA3ETP	2.49735	0.126807	0	0	ZH6_S1	0.949223	--	SAUR-like auxin-responsive protein family
arahy.4DFD6I	1.81963	0.157996	0	0.0817971	ZH6_S1	0.913172	--	LRR and NB-ARC domain disease resistance protein
arahy.PP4PHV	2.79234	0.0191037	0	0	ZH6_S1	0.993159	--	profilin 4
arahy.D17QJV	13.3278	3.54961	2.58204	2.14321	ZH6_S1	0.733669	--	Core-2/I-branching beta-1,6-N-acetylglucosaminyltransferase family protein
arahy.KLG2UC	1.3214	0	0.0745981	0	ZH6_S1	0.943546	--	MATE efflux family protein
arahy.5R195S	4.43918	1.74685	0.814512	0.163182	ZH6_S1	0.606494	MADS	MADS-box transcription factor 6 [Glycine max]
arahy.UIR2ZL	18.4498	0.296729	0.0839479	0.203775	ZH6_S1	0.983917	--	Protein kinase superfamily protein
arahy.24P8DN	0.267705	0.0163471	0.034648	0	ZH6_S1	0.870574	--	organ-specific protein S2-like [Glycine max]
Novel02777	0.188948	0	0.0852777	0	ZH6_S1	0.54867	--	--
arahy.TS49ZR	0.480468	0	0	0	ZH6_S1	1	--	RING-H2 finger protein 2B
arahy.XAK5GM	1.65324	0.0296104	0.385974	0.339027	ZH6_S1	0.766535	--	Unknown protein
arahy.9ETY0Z	0.704016	0.112404	0	0	ZH6_S1	0.840339	TF	myb transcription factor
Novel00472	28.9414	1.53611	1.65684	3.05871	ZH6_S1	0.894314	--	--
Novel01533	7.80366	0.0426199	0.180668	0	ZH6_S1	0.976848	--	--
arahy.9R3N8Z	16.1086	5.85291	2.5885	1.88168	ZH6_S1	0.636659	--	Golgi vesicle transport-related protein n=1 Tax=Dacryopinax sp. (strain DJM 731) RepID=M5G5R1_DACSP
arahy.2AD11G	1.17492	0.0135922	0.153559	0.267663	ZH6_S1	0.772186	GNAT	probable N-acetyltransferase HLS1-like [Glycine max]
arahy.08HZBK	0.206349	0.065899	0	0	ZH6_S1	0.680643	--	MATE efflux family protein
arahy.KRF4CZ	141.437	60.934	51.3031	41.1577	ZH6_S1	0.569178	--	Ras-related small GTP-binding family protein
arahy.E48QH9	1.83302	0.0960696	0.0711972	0.088686	ZH6_S1	0.947589	--	U-box domain-containing protein 4-like [Glycine max]
arahy.P0VEPY	5.21975	0.79561	0.252801	0.281588	ZH6_S1	0.847577	--	LRR and NB-ARC domain disease resistance protein
Novel02401	15.0346	0.137695	0.109829	0.121595	ZH6_S1	0.990841	--	--
arahy.LWGP6Z	0.163482	0.0099249	0.0344985	0	ZH6_S1	0.788977	--	cyclic nucleotide-gated ion channel-like protein
arahy.F1H6I3	5.35845	1.43798	0.415357	0.498644	ZH6_S1	0.731643	--	GNS1/SUR4 membrane protein family
arahy.14KYNF	0.739014	0.0656845	0.0575939	0.0637642	ZH6_S1	0.911119	--	HVA22-like protein F
arahy.KA5826	0.265449	0.0583926	0	0	ZH6_S1	0.780023	--	transmembrane protein, putative
arahy.YTAQ5W	0.131417	0	0	0	ZH6_S1	1	--	dehydrodolichyl diphosphate synthase 2-like [Glycine max]
arahy.T2F26W	25.2045	5.97959	3.93987	2.80647	ZH6_S1	0.762757	--	probable galacturonosyltransferase 4-like [Glycine max]
arahy.07EWQF	9.97702	4.68849	3.11798	1.29998	ZH6_S1	0.530071	--	protein n=1 Tax=Oryza sativa subsp. japonica RepID=Q0D3U6_ORYSJ
arahy.B5Q2R1	7.06423	0.540647	0.0576957	0.127754	ZH6_S1	0.923467	--	serine/threonine protein phosphatase 2A
arahy.WR8IC8	4.86904	2.33689	1.77089	1.00933	ZH6_S1	0.52005	--	GRAM domain family protein
arahy.6MXT9H	3.80441	1.74491	0.68243	1.80664	ZH6_S1	0.525121	ARF	auxin response factor 8
arahy.L8EKIA	52.9957	25.0805	23.6232	17.7311	ZH6_S1	0.526744	--	Acyl-ACP thioesterase
Novel00105	0.119329	0	0	0	ZH6_S1	1	--	--
arahy.1EVC3W	2.57864	0	0	0.107923	ZH6_S1	0.958147	--	unknown protein
arahy.7JIW3E	59.8845	6.45617	4.5214	2.92931	ZH6_S1	0.89219	--	transmembrane protein, putative
arahy.HP46HH	64.4178	9.43321	2.58754	0.874123	ZH6_S1	0.853562	--	subtilisin-like serine protease 2
arahy.2G66YZ	3.34446	1.57787	0.178437	0.0455918	ZH6_S1	0.528213	--	putative indole-3-acetic acid-amido synthetase GH3.9
arahy.KQ5WJ5	51.8453	0.845223	0.706457	0.134547	ZH6_S1	0.983697	--	U-box domain-containing protein 26-like [Glycine max]
arahy.Z3L25C	331.127	3.11852	1.67457	1.24926	ZH6_S1	0.990582	--	RING-H2 finger protein 2B
arahy.E8CC8A	10.8377	4.49807	1.97876	2.48317	ZH6_S1	0.584961	--	phosphoenolpyruvate carboxylase 1
arahy.0FR3XP	1.27208	0.368338	0.358854	0	ZH6_S1	0.710445	--	Unknown protein
arahy.T861P2	1.03752	0	0	0	ZH6_S1	1	--	putative phospholipid-transporting ATPase 9-like isoform X1 [Glycine max]
arahy.JNL70L	19.6658	0.563573	0.536851	0.378094	ZH6_S1	0.971342	--	peptide transporter 1
arahy.QL12SG	31.6678	11.6317	4.15854	3.79118	ZH6_S1	0.632696	HB	DNA-binding protein n=1 Tax=Catharanthus roseus RepID=A1DR77_CATRO
Novel00888	0.728374	0	0	0	ZH6_S1	1	--	--
arahy.66PPWS	1.76308	0.411074	0.0956945	0.202474	ZH6_S1	0.766843	--	nematode resistance protein-like HSPRO2-like [Glycine max]
arahy.PT1YSW	4.46639	1.0163	0.698607	0.659031	ZH6_S1	0.772457	--	L-ascorbate oxidase homolog [Glycine max]
arahy.ZG4E8S	5.94204	0.758241	0.475794	0.386306	ZH6_S1	0.872394	--	hypothetical protein
arahy.YPZ0ZF	113.321	8.13697	14.8522	14.5575	ZH6_S1	0.868937	--	UDP-Glycosyltransferase superfamily protein
arahy.T11RB0	0.110966	0	0	0.0303943	ZH6_S1	0.726093	--	terpene synthase family, metal-binding domain protein
arahy.Z9PXJR	0.115211	0.0192951	0	0	ZH6_S1	0.832524	--	receptor kinase 3
arahy.XA27J7	12.4664	0.0383061	0	0	ZH6_S1	0.996927	--	UDP-Glycosyltransferase superfamily protein
arahy.YGA72Z	46.1166	16.0678	12.2118	11.6107	ZH6_S1	0.651582	BSD	BSD domain-containing protein
arahy.IP23DV	5.23266	2.4786	1.2031	1.43482	ZH6_S1	0.52632	--	autophagy-related protein
arahy.ZQ8NAS	1.68162	0.40035	0.216298	0.0181753	ZH6_S1	0.761926	--	receptor-like serine/threonine kinase 2
arahy.IYC01E	5.29783	0.561579	0.243233	0.0865626	ZH6_S1	0.893998	--	18.1 kDa class I heat shock protein-like [Glycine max]
arahy.4IV72F	0.473828	0.0170293	0	0	ZH6_S1	0.96406	--	disease resistance protein (TIR-NBS-LRR class)
arahy.6D5JL1	18.3501	6.21486	5.3983	4.73345	ZH6_S1	0.661317	--	NIPA-like protein 2-like isoform X1 [Glycine max]
arahy.TPGZ8P	22.9601	9.38466	4.62784	4.48302	ZH6_S1	0.591262	--	Vps51/Vps67 family (components of vesicular transport) protein
arahy.AT7H7M	12.7529	3.73533	2.36975	0.190722	ZH6_S1	0.707099	Sigma70-like	RNA polymerase sigma factor
arahy.7W0SSB	168.206	44.9373	41.7046	18.911	ZH6_S1	0.732844	--	zinc finger A20 and AN1 domain stress-associated protein
arahy.SG1KTY	0.344589	0.0657492	0	0	ZH6_S1	0.809196	--	phy rapidly regulated 1
arahy.BRY8W5	0.10421	0	0	0	ZH6_S1	1	--	Unknown protein
arahy.9LA4BC	3.82194	0.0376855	0.421552	0.193889	ZH6_S1	0.889702	--	peptide transporter 1
arahy.469CUM	0.569607	0	0	0	ZH6_S1	1	TF	putative transcription factor bHLH086-like [Glycine max]
arahy.TP8RDG	0.369496	0	0.0963296	0.175373	ZH6_S1	0.525373	--	Flavin-containing monooxygenase family protein
arahy.58WBAP	0.842512	0.102714	0	0	ZH6_S1	0.878086	--	protein YLS7-like [Glycine max]
Novel00930	9.22344	1.12654	0.460471	0.0303014	ZH6_S1	0.877861	--	--
arahy.V14B4E	7.94705	0.560722	0.938166	0.687255	ZH6_S1	0.881948	--	uncharacterized protein LOC102669532 isoform X3 [Glycine max]
arahy.Y876JP	13.114	2.50664	0.990883	0.65808	ZH6_S1	0.808859	Jumonji	2-oxoglutarate (2OG) and Fe(II)-dependent oxygenase superfamily protein
arahy.VH5N8W	15.7784	1.13428	5.48236	6.82838	ZH6_S1	0.567232	--	protein PLANT CADMIUM RESISTANCE 2-like [Glycine max]
arahy.26KT5A	0.1618	0	0	0	ZH6_S1	1	--	alpha 1,4-glycosyltransferase family protein, putative
arahy.48Z960	0.302546	0.142324	0.0251973	0	ZH6_S1	0.529578	--	protein YLS7-like [Glycine max]
arahy.F17DQG	0.264896	0.0447475	0	0	ZH6_S1	0.831075	--	ATP-dependent Clp protease ATP-binding subunit, putative
arahy.M0CFGP	0.483594	0	0	0.051832	ZH6_S1	0.892819	--	Unknown protein
arahy.N9CZ0Q	0.14313	0	0	0	ZH6_S1	1	--	Unknown protein
arahy.T6DYUJ	0.697471	0	0	0.0532718	ZH6_S1	0.923622	--	protein pelota-like [Glycine max]
arahy.BHDE6S	0.918466	0.272589	0.148911	0.231076	ZH6_S1	0.703212	--	Cyclopropane-fatty-acyl-phospholipid synthase
arahy.Y0P616	24.4037	9.21005	6.00529	1.70227	ZH6_S1	0.622596	--	Bowman-Birk type proteinase inhibitor B-II n=1 Tax=Arachis hypogaea RepID=IBB2_ARAHY
arahy.PUL54B	0.700903	0	0	0	ZH6_S1	1	--	Unknown protein
arahy.4SAZ8F	0.805028	0.316418	0.105682	0.384798	ZH6_S1	0.522007	--	Unknown protein
arahy.CEXW72	3.51472	0.285214	0.226039	0.184381	ZH6_S1	0.918852	--	BTB/POZ domain-containing protein [Glycine max]
arahy.SNC74A	0.77694	0.054706	0	0	ZH6_S1	0.929588	--	syntaxin of plants 131
arahy.HHS436	1.05675	0.280315	0.0511045	0	ZH6_S1	0.734739	--	Unknown protein
arahy.M2AJRY	40.6191	19.1251	9.52839	5.95807	ZH6_S1	0.52916	--	diacylglycerol kinase 7
arahy.AF7BT4	5.72671	0.0527822	0.0781017	0.264657	ZH6_S1	0.953786	--	ATP synthase F1, alpha subunit
arahy.WSM8QM	63.2417	2.20764	0.927202	0.420687	ZH6_S1	0.965092	MYB	myb transcription factor
arahy.AELR7S	14.1871	0.807424	0.199183	0	ZH6_S1	0.943088	--	alpha-1,4-glucan-protein synthase [UDP-forming]-like protein
arahy.STND79	0.706522	0.0150182	0.0717805	0	ZH6_S1	0.898403	--	tubulin alpha-4 chain
arahy.BNKV9R	15.4583	5.92507	5.16373	2.80935	ZH6_S1	0.616706	--	protein YIF1B-like isoform X3 [Glycine max]
arahy.XNQT3T	0.139072	0.0213741	0.0557265	0.0507263	ZH6_S1	0.599298	--	zinc finger protein CONSTANS-LIKE 16-like [Glycine max]
arahy.K28DE3	6.58593	2.50926	1.24211	0.228409	ZH6_S1	0.618997	--	FAD/NAD(P)-binding oxidoreductase family protein
arahy.4PU0PP	37.8791	8.11526	13.151	3.22915	ZH6_S1	0.652816	--	Protein-tyrosine phosphatase-like, PTPLA
arahy.MX0VEQ	131.106	0.506623	0.413495	0.640064	ZH6_S1	0.995118	MADS	MADS-box transcription factor family protein
arahy.J5QP8A	17.9063	5.19723	3.20084	2.02495	ZH6_S1	0.709755	--	Ankyrin repeat family protein
arahy.T4QRY3	23.6993	0.495293	0.140844	0.206918	ZH6_S1	0.979101	--	adiponectin receptor protein 2-like isoform X3 [Glycine max]
arahy.2GQ1G5	9.45175	4.0583	1.32519	1.65944	ZH6_S1	0.57063	--	Unknown protein
arahy.MVBZ07	16.3667	2.70591	0.552245	0	ZH6_S1	0.834669	SBP	squamosa promoter binding protein-like 3
arahy.864J84	11.027	5.20901	4.25176	2.79457	ZH6_S1	0.527612	--	Got1/Sft2-like vescicle transport protein family
arahy.0GNU4R	1.45624	0.0907625	0	0	ZH6_S1	0.937674	TF	MADS-box transcription factor 6 [Glycine max]
arahy.QT2H54	20.9144	0.25334	0.346989	0.0823996	ZH6_S1	0.983409	--	UDP-Glycosyltransferase superfamily protein
arahy.BL68M3	15.9155	7.92508	5.50739	4.48485	ZH6_S1	0.502051	--	uncharacterized protein LOC100798622 isoform X2 [Glycine max]
arahy.4JLS0K	57.3827	4.37879	3.25649	3.79916	ZH6_S1	0.923692	--	probable galacturonosyltransferase 15-like [Glycine max]
arahy.F1JPW2	0.178629	0.0249258	0	0	ZH6_S1	0.86046	--	sulfotransferase 2A
arahy.VG7JT5	6.73457	2.83518	2.00024	1.75187	ZH6_S1	0.57901	--	SPX and EXS domain-containing protein 1-like [Glycine max]
arahy.351IJG	18.1427	5.62662	3.76398	2.66307	ZH6_S1	0.689869	--	Calcium-binding endonuclease/exonuclease/phosphatase family
arahy.LE28RK	1.31755	0.0459591	0.0634835	0	ZH6_S1	0.951817	C2H2	triacylglycerol lipase-like 1
arahy.T42YYR	17.7582	0	1.29876	0.768408	ZH6_S1	0.926864	--	DUF4408 domain protein
Novel04614	9.47568	2.52235	1.54369	0.932193	ZH6_S1	0.733808	--	--
arahy.N80N6E	0.52185	0.167256	0.130558	0	ZH6_S1	0.679494	--	vesicle associated protein
arahy.ZEH3NP	7.31402	0.563538	1.97349	0.92479	ZH6_S1	0.730178	--	GRAM domain-containing protein / ABA-responsive protein-related
arahy.F0M84G	10.533	0.24955	0.23258	0.17246	ZH6_S1	0.976308	--	cation/H+ exchanger 20
arahy.DV7QWZ	109.056	3.24338	13.3932	2.25481	ZH6_S1	0.87719	MYB	MYB transcription factor MYB51 [Glycine max]
arahy.642FWA	0.124419	0	0	0	ZH6_S1	1	--	cysteine-rich receptor-like protein kinase 29-like [Glycine max]
Novel00641	5.51786	0.366292	0.103707	0.140922	ZH6_S1	0.933617	--	--
arahy.8D3DC2	3.07957	0.336075	0.2206	0.103274	ZH6_S1	0.890869	--	nodulin MtN21 /EamA-like transporter family protein
arahy.SQK8DJ	0.792146	0.354344	0.057123	0.0283642	ZH6_S1	0.552678	--	UDP-glucuronate:xylan alpha-glucuronosyltransferase 2-like [Glycine max]
arahy.4DYP8N	3.66083	0.448647	1.41816	1.13917	ZH6_S1	0.612613	--	disease-resistance response protein
arahy.M3L8KX	0.110879	0	0	0	ZH6_S1	1	--	UDP-Glycosyltransferase superfamily protein
arahy.G53T1T	3.63584	1.77016	1.30009	1.24597	ZH6_S1	0.513135	--	alternative NAD(P)H dehydrogenase 2
arahy.0RH9QK	40.2984	0.782411	1.78171	0.451122	ZH6_S1	0.955787	TF	basic helix loop helix (bHLH) family transcription factor
arahy.NM4EZ4	2.46312	0	0.0462914	0	ZH6_S1	0.981206	--	ATP synthase F1, alpha subunit
arahy.I8TN6N	493.55	62.6411	92.2108	48.4337	ZH6_S1	0.813168	--	ATPase subunit 8 (mitochondrion) [Glycine max]
arahy.KJH8AJ	0.131203	0	0	0	ZH6_S1	1	--	transmembrane amino acid transporter family protein
arahy.4YP1G2	0.805436	0	0	0	ZH6_S1	1	--	Peroxidase superfamily protein
arahy.NG1HRH	0.165955	0.0143885	0	0	ZH6_S1	0.913299	--	Protein phosphatase 2C family protein
arahy.S1R27D	0.304329	0.0559625	0	0	ZH6_S1	0.816112	--	Cellulose synthase family protein
arahy.243YXU	5.46441	0	0	0	ZH6_S1	1	--	probable pectate lyase 3-like [Glycine max]
arahy.4A371W	2.10319	0	0	0	ZH6_S1	1	--	Unknown protein
arahy.X94JKI	7.33902	0.272108	0.0749929	0.058515	ZH6_S1	0.962923	--	L-ascorbate oxidase [Glycine max]
arahy.3P698T	0.17496	0.0125503	0	0	ZH6_S1	0.928267	--	alpha 1,4-glycosyltransferase family protein
arahy.T6BXM8	0.318009	0.0393631	0	0.0805817	ZH6_S1	0.746605	--	Protein kinase superfamily protein
arahy.V50H5Q	4.56083	0.981783	1.35474	0.519689	ZH6_S1	0.702962	--	coatomer subunit zeta-3-like [Glycine max]
arahy.IX3DUW	3.14846	0.565375	0.145738	0.0947582	ZH6_S1	0.820428	--	Galactosyltransferase family protein
arahy.G88L7W	14.0786	2.13652	3.83566	1.02472	ZH6_S1	0.727555	--	trehalose phosphate synthase
Novel03694	0.192694	0	0	0	ZH6_S1	1	--	--
arahy.CTKS8M	27.2188	12.955	7.20514	6.25645	ZH6_S1	0.52404	--	ARID/BRIGHT DNA-binding domain
arahy.63G7RJ	22.4963	4.15993	1.43077	1.03602	ZH6_S1	0.815084	--	arabinose 5-phosphate isomerase, putative
arahy.K0BPHG	27.697	6.05465	2.21476	0.282594	ZH6_S1	0.781397	--	Mitochondrial substrate carrier family protein
arahy.3B2HJD	11.5569	1.68089	0.797032	0.517859	ZH6_S1	0.854555	--	salicylic acid carboxyl methyltransferase
arahy.60A6T2	1.15366	0.427816	0.156682	0.0503398	ZH6_S1	0.629165	--	unknown protein
arahy.T9BXJY	9.15743	2.14743	0.822498	0.427412	ZH6_S1	0.765498	--	Nucleotide-sugar transporter family protein
arahy.B3D4NA	0.532591	0.214914	0.202371	0	ZH6_S1	0.596475	--	zinc-binding alcohol dehydrogenase family protein
arahy.8D5WLD	0.452944	0.103608	0.0844098	0.0485317	ZH6_S1	0.771257	--	uncharacterized protein LOC100792919 isoform X4 [Glycine max]
arahy.U0AKQE	20.3456	7.34787	3.76222	3.67704	ZH6_S1	0.638847	--	Vps51/Vps67 family (components of vesicular transport) protein
arahy.FVV1VG	0.559463	0	0	0	ZH6_S1	1	--	meiotically up-regulated protein 71-like protein
arahy.BU3786	4.13895	1.23487	0.855052	0.461915	ZH6_S1	0.701646	--	Cytochrome P450 superfamily protein
arahy.2F0WHB	55.8329	15.0478	7.2645	3.84308	ZH6_S1	0.730485	--	potassium transporter 2
arahy.8B51UP	47.3441	8.6598	2.00507	2.2094	ZH6_S1	0.817088	--	SAUR-like auxin-responsive protein family
arahy.F96IVA	2.23892	0.655287	0.305999	0.711087	ZH6_S1	0.682397	--	ATP binding/protein serine/threonine kinase [Glycine max]
arahy.A0AXDD	24.6977	5.89005	4.34845	3.93389	ZH6_S1	0.761515	--	Protein kinase superfamily protein
arahy.8J6NGJ	0.203815	0.0482028	0.041008	0.0319975	ZH6_S1	0.763498	--	galactoside 2-alpha-L-fucosyltransferase-like protein
arahy.RXWH3W	0.279629	0	0	0	ZH6_S1	1	--	kunitz trypsin inhibitor 1
arahy.271EIT	0.109331	0.0152561	0	0	ZH6_S1	0.86046	--	benzyl alcohol O-benzoyltransferase-like [Glycine max]
arahy.MV0Z6Q	1.05618	0.299019	0.052791	0	ZH6_S1	0.716887	--	laccase 2
arahy.DPYD9S	0.429891	0	0	0	ZH6_S1	1	--	Stigma-specific Stig1 family protein
Novel01314	2.78275	0	0.0572908	0	ZH6_S1	0.979412	--	--
arahy.J18N96	0.744272	0	0	0.104492	ZH6_S1	0.859605	--	Secretory carrier membrane protein (SCAMP) family protein
Novel03935	7.21842	0	0	0	ZH6_S1	1	--	--
arahy.BVMI19	3.96874	0.435535	0.571312	0.433884	ZH6_S1	0.856047	--	structural molecule protein
arahy.D8W1EX	0.883002	0.297475	0.0823452	0	ZH6_S1	0.66311	--	pfkB-like carbohydrate kinase family protein
arahy.74ZQ7H	3.87487	1.86587	0.642977	0.501699	ZH6_S1	0.518468	--	senescence-associated protein
arahy.RUJ0QA	170.449	12.6039	7.63521	9.34505	ZH6_S1	0.926055	--	Gibberellin-regulated family protein
arahy.CYMD29	1198.44	2.71948	4.42156	5.89243	ZH6_S1	0.995083	--	receptor-like protein kinase 2
arahy.WLS58Y	15.987	0.124496	0.258596	0.0780871	ZH6_S1	0.983825	--	GDSL-like Lipase/Acylhydrolase superfamily protein
arahy.W6C7L5	0.240685	0.0500009	0	0	ZH6_S1	0.792256	--	CAP (Cysteine-rich secretory proteins, Antigen 5, and Pathogenesis-related 1 protein) superfamily protein
Novel00201	9.62128	1.3037	0.675703	0.323721	ZH6_S1	0.864498	--	--
arahy.E3S8EN	0.21351	0	0	0	ZH6_S1	1	--	myb-related protein 3R-1-like isoform X3 [Glycine max]
arahy.KPS8UW	25.6163	0.0970947	0.126573	0	ZH6_S1	0.995059	--	SAUR-like auxin-responsive protein family
arahy.YRI3HS	1.56177	0.617328	0.639309	0	ZH6_S1	0.59065	--	Myb/SANT-like DNA-binding domain protein
arahy.J961PB	103.433	43.3308	41.1575	34.1254	ZH6_S1	0.581073	--	zinc finger A20 and AN1 domain stress-associated protein
arahy.T4ULTV	2.30852	0.100346	0.041232	0.0187662	ZH6_S1	0.956532	--	cytosolic endo-beta-N-acetylglucosaminidase
arahy.D59GD5	0.115844	0	0	0	ZH6_S1	1	--	Cytochrome P450 superfamily protein
Novel00770	0.327951	0.106504	0.0576753	0	ZH6_S1	0.675245	--	--
arahy.0V7YUS	0.778852	0.0355412	0	0	ZH6_S1	0.954367	--	FASCICLIN-like arabinogalactan-protein 11
arahy.RZ3VA1	1.51913	0.32769	0.122706	0.222698	ZH6_S1	0.78429	--	GTP-binding nuclear protein Ran-3 [Glycine max]
arahy.JNS4CJ	31.1466	8.82531	3.34425	2.59629	ZH6_S1	0.716652	--	cellulose synthase-like D3
Novel03690	1.40639	0.569891	0.428975	0.390485	ZH6_S1	0.594785	--	--
arahy.50I9RC	0.954827	0.163595	0.0258557	0.265897	ZH6_S1	0.721523	--	ARM repeat superfamily protein
arahy.WX19GT	2.68994	0.182428	0	0	ZH6_S1	0.932181	--	Protein kinase family protein
arahy.IZX6KC	23.2032	10.3448	8.65154	5.30586	ZH6_S1	0.554166	--	Clathrin adaptor complexes medium subunit family protein
arahy.PRY7KT	1.61375	0	0	0	ZH6_S1	1	--	Sulfite exporter TauE/SafE family protein
arahy.DYUI9Q	36.1022	0.209231	0	0.222664	ZH6_S1	0.993832	--	SAUR-like auxin-responsive protein family
arahy.HRQ2U6	3.90519	0.0729801	0	0	ZH6_S1	0.981312	--	synaptosomal-associated protein SNAP25-like 29
arahy.0JH0K6	2.6227	1.18001	0.573511	0.228408	ZH6_S1	0.550077	--	cystathionine gamma-synthase
arahy.Z7C896	19.1855	7.0568	5.771	3.1742	ZH6_S1	0.632181	--	Protein kinase superfamily protein
arahy.C5R797	0.563571	0.0227112	0.0888189	0.0538996	ZH6_S1	0.8424	--	threonine dehydratase biosynthetic protein
arahy.LYRN80	10.3388	2.95627	0.646829	0	ZH6_S1	0.71406	--	blue copper protein-like [Glycine max]
arahy.YYF952	6.43475	2.6535	1.28632	0.584112	ZH6_S1	0.587629	--	ectonucleotide pyrophosphatase/phosphodiesterase
arahy.DY2W05	7.33813	0.167762	0.261484	0	ZH6_S1	0.964366	--	uncharacterized protein LOC100815215 [Glycine max]
arahy.2A56XJ	33.2706	0.760246	0.558999	0.1051	ZH6_S1	0.97715	MYB	myb transcription factor
arahy.LWG93W	38.7259	13.7015	6.31878	5.61949	ZH6_S1	0.646193	--	Integral membrane Yip1 family protein
arahy.Z0JMUR	40.3848	7.03931	9.76168	11.1046	ZH6_S1	0.725032	--	calcium-transporting ATPase 8, plasma membrane-type protein
Novel02915	0.306381	0.0506939	0	0	ZH6_S1	0.83454	--	--
arahy.8PPI9D	65.332	2.49117	0.845751	0.497966	ZH6_S1	0.961869	--	cinnamyl alcohol dehydrogenase 9
Novel02924	28.3091	0	0	0	ZH6_S1	1	--	--
arahy.84B366	14.0858	0	0.075215	0	ZH6_S1	0.99466	--	Cytochrome P450 superfamily protein
arahy.B0G4GL	6.24564	0.338929	0.542928	0.121911	ZH6_S1	0.913071	--	putative cyclic nucleotide-gated ion channel 15-like isoform X2 [Glycine max]
arahy.83S23U	14.3715	6.09543	5.24638	6.08248	ZH6_S1	0.575866	--	Golgi SNAP receptor complex member 1-1-like [Glycine max]
arahy.HZHI7V	53.5039	18.4764	17.7585	15.1501	ZH6_S1	0.654672	--	Protein of unknown function (DUF1068)
arahy.U456D3	0.843806	0.377919	0.172672	0.0725458	ZH6_S1	0.552126	--	Acyl-CoA N-acyltransferases (NAT) superfamily protein
arahy.JEY2CC	68.3019	6.12365	4.13804	1.36783	ZH6_S1	0.910344	--	Polyketide cyclase/dehydrase and lipid transport superfamily protein
arahy.GR42S7	565.027	117.969	73.9504	109.103	ZH6_S1	0.791215	--	senescence-associated protein, putative
arahy.CVQ7TS	2.3311	1.06823	0.965851	0.663647	ZH6_S1	0.541749	--	F-box/RNI-like superfamily protein
arahy.D9MA0I	79.586	2.80754	1.82954	3.77132	ZH6_S1	0.952613	--	phloem protein 2-A9
arahy.SK3GF7	5.26432	0	0	0	ZH6_S1	1	--	SAUR-like auxin-responsive protein family
arahy.3F2LJ6	7.43407	0.603412	1.07927	0.529318	ZH6_S1	0.854822	NAC	NAC domain protein,
arahy.FT1LK2	6.84909	2.77408	1.45513	1.04541	ZH6_S1	0.59497	--	epsin-3-like [Glycine max]
arahy.VSRR5J	5.3099	0.45306	0.151962	0	ZH6_S1	0.914676	--	Disease resistance-responsive (dirigent-like protein) family protein
arahy.FKA8YF	0.786668	0.234592	0.136101	0.272636	ZH6_S1	0.653429	--	U-box domain-containing protein 44-like isoform X2 [Glycine max]
arahy.S4HK2G	23.5673	8.34407	3.87275	3.72027	ZH6_S1	0.645947	--	DnaJ heat shock amine-terminal domain protein
arahy.J3QXZL	0.147859	0.041223	0.0436866	0	ZH6_S1	0.704539	--	trehalose-6-phosphate phosphatase
arahy.F0A5DA	0.263428	0	0	0	ZH6_S1	1	TF	myb transcription factor
arahy.B8M078	73.5593	2.13302	20.7891	6.01829	ZH6_S1	0.717383	--	unknown protein
arahy.KR6Y3F	36.2957	7.64371	2.9925	2.33838	ZH6_S1	0.789405	--	uncharacterized protein LOC100811998 [Glycine max]
arahy.01RQ4M	7.57286	2.11057	1.28103	0.251746	ZH6_S1	0.721298	--	alpha/beta-hydrolase superfamily protein
arahy.FX875U	36.7441	13.5906	9.32834	5.18487	ZH6_S1	0.630128	--	Protein of unknown function (DUF506)
arahy.K69D77	11.6489	2.26662	1.34805	1.54918	ZH6_S1	0.805421	--	ATP-dependent RNA helicase, mitochondrial, putative
arahy.L8MD46	5.89169	0	0.0457684	0.159331	ZH6_S1	0.972957	--	purple acid phosphatase 22
arahy.UIG78U	110.315	20.6538	20.7212	16.1607	ZH6_S1	0.812162	--	polyamine oxidase 2
arahy.IGE775	78.8898	22.357	18.674	17.5409	ZH6_S1	0.716604	--	kinesin light chain
arahy.4IR4XJ	1.66502	0.268037	0.502319	0.117616	ZH6_S1	0.69831	TF	WRKY family transcription factor
arahy.W479GS	1.23292	0	0	0	ZH6_S1	1	WRKY	WRKY family transcription factor
arahy.ISB7YF	8.24705	1.23945	2.93826	1.98633	ZH6_S1	0.64372	--	GRAM domain-containing protein / ABA-responsive protein-related
arahy.I50STK	83.9169	29.9518	14.8187	10.5329	ZH6_S1	0.643078	--	V-type proton ATPase subunit E-like isoform X1 [Glycine max]
arahy.TA3H6N	0.917769	0	0	0	ZH6_S1	1	--	Acyl-ACP thioesterase
arahy.5M8WSB	0.161901	0.0488313	0	0	ZH6_S1	0.698389	--	blue copper protein-like [Glycine max]
arahy.65GG0R	0.139976	0.0247697	0.0215265	0	ZH6_S1	0.823043	--	uncharacterized protein LOC102659944 [Glycine max]
arahy.MBM2VS	3.05124	0.0495558	0	0	ZH6_S1	0.983759	--	Dormancy/auxin associated family protein
arahy.AK92GL	44.5544	0.089457	0.149503	0.0777649	ZH6_S1	0.996644	--	Chitinase family protein
arahy.02DA49	3.73833	1.20136	1.41348	1.35289	ZH6_S1	0.621896	--	AUTOPHAGY 8E
arahy.IC78MS	0.245928	0	0	0	ZH6_S1	1	--	1-aminocyclopropane-1-carboxylate oxidase homolog 1 [Glycine max]
arahy.RK8HN4	4.00493	0	0.0240116	0	ZH6_S1	0.994004	MYB	myb transcription factor
arahy.WQT719	17.5226	8.44203	7.99964	6.30843	ZH6_S1	0.518219	--	Protein kinase superfamily protein
arahy.UF9ZNK	2.5528	0.0713262	0.297096	0.471219	ZH6_S1	0.815411	--	Cytochrome P450 superfamily protein
arahy.92QZ6T	2.71651	0.16058	0.104666	0	ZH6_S1	0.940888	--	uncharacterized protein LOC100796883 [Glycine max]
arahy.33QXTL	45.3004	8.00616	3.06014	1.15648	ZH6_S1	0.823265	--	uncharacterized protein LOC100791257 [Glycine max]
arahy.6AFN3K	32.1274	14.1467	5.10695	2.58027	ZH6_S1	0.559668	--	ribonuclease 2-like [Glycine max]
arahy.LD1295	1.35093	0.571276	0.044219	0.0734346	ZH6_S1	0.577124	--	glucan endo-1,3-beta-glucosidase-like protein 2-like [Glycine max]
arahy.3P2HKF	14.7356	5.08318	3.60068	3.78148	ZH6_S1	0.65504	--	Exostosin family protein
arahy.P95M2R	1.24717	0.164504	0.273932	0.172158	ZH6_S1	0.780357	--	cyclic nucleotide-gated ion channel-like protein
arahy.VBG525	22.772	8.95842	5.74059	3.21122	ZH6_S1	0.606604	--	armadillo repeat only 2
arahy.A6MJL2	417.492	0.606106	1.46759	0.628892	ZH6_S1	0.996485	--	B12D protein
arahy.X4KYJQ	8.31749	1.66488	1.73586	2.35256	ZH6_S1	0.717155	--	sugar porter (SP) family MFS transporter
arahy.2W3ULI	21.7015	2.02897	2.79663	1.25235	ZH6_S1	0.871132	--	Tyrosine phosphatase family protein
arahy.IB7BS1	8.00557	0.0776758	0	0.0840798	ZH6_S1	0.989497	--	myosin heavy chain-related
arahy.7SAD34	24.206	0	0.122306	0	ZH6_S1	0.994947	--	SAUR-like auxin-responsive protein family
arahy.PKW5X9	15.2314	4.38686	0.843787	0.338903	ZH6_S1	0.711985	--	monogalactosyldiacylglycerol synthase 2
arahy.7LRL61	3.8416	0.122921	0.0542905	0.386676	ZH6_S1	0.899345	--	Oxysterol-binding family protein
arahy.SE5II1	29.6881	9.91257	11.621	9.95673	ZH6_S1	0.608565	--	Protein of unknown function (DUF1068)
arahy.QR57P7	0.873293	0.371468	0.193498	0.373143	ZH6_S1	0.572717	--	senescence-associated protein
arahy.VLLC8N	1.80008	0.0250371	0.0460223	0.0104742	ZH6_S1	0.974433	--	ATP-binding ABC transporter
arahy.S0PZ3T	0.416705	0	0	0	ZH6_S1	1	--	nodulin MtN21 /EamA-like transporter family protein
arahy.MJW2EP	27.6619	1.30207	0.59159	0.215403	ZH6_S1	0.952929	--	SAUR-like auxin-responsive protein family
arahy.1274C3	2.22285	0.755077	1.08983	0.599612	ZH6_S1	0.509716	--	protein FAM91A1-like isoform X1 [Glycine max]
arahy.LQNM08	4.09927	0.382404	0.902956	0.117212	ZH6_S1	0.779728	--	gamma carbonic anhydrase 1
arahy.TF4YBA	0.112541	0.0417537	0	0	ZH6_S1	0.628992	--	nodulin MtN21 /EamA-like transporter family protein
arahy.TJ44DN	0.759245	0.120863	0	0	ZH6_S1	0.840811	--	Calcium-binding EF hand family protein
arahy.4S91CP	0.148049	0	0	0	ZH6_S1	1	--	putative nuclease HARBI1-like [Glycine max]
arahy.RNL9EZ	6.31355	0.399512	0.0656414	0.0920583	ZH6_S1	0.936722	--	nudix hydrolase homolog 13
arahy.P9FT6E	7.44406	3.72111	1.15104	0.688259	ZH6_S1	0.500123	--	uncharacterized protein LOC100782302 isoform X2 [Glycine max]
arahy.MX795F	52.9052	22.0993	4.5409	2.7765	ZH6_S1	0.582286	--	cinnamyl alcohol dehydrogenase 9
arahy.50NT7J	5.77768	2.42878	1.64608	1.58484	ZH6_S1	0.579628	--	Regulator of chromosome condensation (RCC1) family protein
arahy.5L2UNJ	3057.71	222.733	214.024	92.4268	ZH6_S1	0.927157	--	Bifunctional inhibitor/lipid-transfer protein/seed storage 2S albumin superfamily protein
arahy.YYPI83	8.83156	0	0	0	ZH6_S1	1	--	Ribonuclease T2 family protein
arahy.CSG8WT	3.43541	0	0.341111	0	ZH6_S1	0.900707	--	Unknown protein
arahy.7E5NA9	1.10813	0.0715763	0	0	ZH6_S1	0.935408	--	GDSL-like Lipase/Acylhydrolase superfamily protein
arahy.YZ918W	541.477	48.2797	6.33653	0.434448	ZH6_S1	0.910837	--	Protein of unknown function, DUF642
Novel04026	0.708839	0.0757106	0.0534902	0	ZH6_S1	0.893191	--	--
Novel02350	0.687083	0.211264	0.139554	0	ZH6_S1	0.69252	--	--
arahy.DHC979	0.125841	0	0	0	ZH6_S1	1	--	Disease resistance protein (TIR-NBS-LRR class) family
arahy.TZ6N57	22.8195	6.85804	5.19426	3.43209	ZH6_S1	0.699466	--	tetratricopeptide repeat protein 1-like isoform X1 [Glycine max]
Novel03670	1.30795	0.526293	0.214239	0.244343	ZH6_S1	0.597621	--	--
arahy.3B1CVE	5.62915	0.012131	0.195031	0.0575799	ZH6_S1	0.965353	--	Cytochrome P450 superfamily protein
arahy.L98YJM	27.3183	9.64613	3.37435	2.19939	ZH6_S1	0.646899	--	Potassium transporter family protein
arahy.16J66J	13.9931	0.099823	0.133325	0.0531421	ZH6_S1	0.990472	--	1-aminocyclopropane-1-carboxylate synthase 4
arahy.39XEAH	0.365246	0	0	0	ZH6_S1	1	--	ADP/ATP carrier 2
arahy.TBP304	0.147235	0.0432389	0	0	ZH6_S1	0.706327	--	ubiquitin carboxyl-terminal hydrolase-like protein
arahy.ITY3SF	0.25362	0.012993	0	0	ZH6_S1	0.94877	--	MATE efflux family protein
arahy.IG8JQ5	0.572399	0.115286	0.104484	0.0671387	ZH6_S1	0.798591	--	PI-PLC X domain-containing protein At5g67130-like [Glycine max]
arahy.ZLL7AW	18.5947	0.327619	0.269421	0.533355	ZH6_S1	0.971317	--	beta glucosidase 40
arahy.N8RR3Y	53.8037	0.327703	0.631568	0.269045	ZH6_S1	0.988262	Trihelix	trihelix transcription factor GT-2-like [Glycine max]
arahy.5NX4LW	11.478	0.201186	0.195919	0.0995417	ZH6_S1	0.982472	--	nine-cis-epoxycarotenoid dioxygenase 3
arahy.NB8KRW	67.5933	6.97572	9.31928	1.24323	ZH6_S1	0.862127	NAC	NAC domain containing protein 3
arahy.0BJ33Y	24.3888	0.0305438	0.0833164	0.0650096	ZH6_S1	0.996584	--	uncharacterized protein LOC100803605 [Glycine max]
arahy.QKR4AW	1.27961	0.153493	0.0224747	0.0746476	ZH6_S1	0.880047	--	RAB GDP dissociation inhibitor 2
arahy.704HAC	74.3423	8.09573	7.07869	3.7881	ZH6_S1	0.891102	--	uncharacterized protein LOC100811015 [Glycine max]
arahy.GJ0FTP	40.0919	6.83737	10.8719	11.4994	ZH6_S1	0.713174	--	calcium-transporting ATPase 8, plasma membrane-type protein
arahy.GRBG8Y	0.292394	0.0598769	0.0866873	0.0205856	ZH6_S1	0.703526	--	receptor-like serine/threonine kinase 2
arahy.IL2M1J	0.198488	0.0113969	0.0445711	0.0493462	ZH6_S1	0.751389	--	type I inositol 1,4,5-trisphosphate 5-phosphatase CVP2-like [Glycine max]
Novel01001	0.178401	0	0	0	ZH6_S1	1	--	--
arahy.JB9PK4	4.3069	1.51607	2.05609	2.15132	ZH6_S1	0.500494	NAC	NAC domain containing protein 1
arahy.ZRIJ0L	0.575673	0.0510183	0	0	ZH6_S1	0.911376	--	ATP binding microtubule motor family protein
arahy.8W8UWC	20.6107	8.95442	3.99682	2.86897	ZH6_S1	0.565546	--	ferrochelatase 1
arahy.QFB2YZ	47.3097	1.87059	1.16314	0.341161	ZH6_S1	0.960461	--	probable polygalacturonase-like [Glycine max]
arahy.TYLU08	2123.04	360.121	169.924	59.9515	ZH6_S1	0.830375	--	catalase 2
arahy.W8AC1S	0.580032	0.0834023	0.0398241	0	ZH6_S1	0.856211	--	12-oxophytodienoate reductase 2
Novel01055	10.4095	1.38362	1.04234	0.374541	ZH6_S1	0.86708	--	--
arahy.H3SLDN	0.177898	0	0	0	ZH6_S1	1	--	Unknown protein
arahy.Z4U2NE	32.4753	0.924152	0.329837	0.0720622	ZH6_S1	0.971543	--	tetraspanin-6 [Glycine max]
arahy.SXH817	9.30779	3.10145	1.08737	0.123728	ZH6_S1	0.66679	--	endo-1,3
arahy.D34J8Q	1.38901	0	0	0	ZH6_S1	1	--	DHHC-type zinc finger family protein
arahy.RRY0UC	31.0103	1.60885	0.3913	0	ZH6_S1	0.948119	--	uncharacterized protein LOC100816650 isoform X2 [Glycine max]
arahy.IA9U5E	78.09	6.78529	3.32243	2.45488	ZH6_S1	0.913109	--	glycerol-3-phosphate acyltransferase 4
arahy.73EBH2	0.287148	0.0526036	0.0586336	0.0145571	ZH6_S1	0.795807	--	disease resistance family protein / LRR family protein
arahy.YU8K39	3.34681	0.203822	0.135472	0.395621	ZH6_S1	0.881791	--	uridine kinase-like 2
Novel05014	2.79899	0.929253	0.732294	0.598201	ZH6_S1	0.668004	--	--
arahy.0CS5BR	29.5111	12.7836	9.32102	6.52526	ZH6_S1	0.56682	--	polypyrimidine tract-binding protein 1
arahy.GQ1BIK	166.475	44.6205	23.8062	9.79569	ZH6_S1	0.731968	--	glyoxal oxidase-related protein
arahy.DQYB4L	8.38771	1.88557	0.599775	0.630026	ZH6_S1	0.775198	--	Cotton fiber expressed protein n=1 Tax=Medicago truncatula RepID=G7KLN1_MEDTR
arahy.WY3QF4	0.148701	0	0	0	ZH6_S1	1	--	Integrase-type DNA-binding superfamily protein
Novel01748	9.83367	1.33256	1.93831	1.37779	ZH6_S1	0.80289	--	--
arahy.MHKX6K	0.364701	0.164972	0.0297392	0	ZH6_S1	0.547651	--	Cytochrome P450 superfamily protein
arahy.3WRE7I	3.0738	1.13483	0.437573	0.173604	ZH6_S1	0.630807	--	probable calcium-binding protein CML25-like [Glycine max]
arahy.F0MAER	0.237331	0	0	0	ZH6_S1	1	--	wall-associated receptor kinase-like 15-like [Glycine max]
arahy.9A188Y	0.36527	0.12017	0.0832035	0	ZH6_S1	0.671011	--	Bifunctional polymyxin resistance arnA protein n=2 Tax=Papilionoideae RepID=G7JIF7_MEDTR
arahy.KY1FTE	3.30755	0.0601603	0.128189	0.0555366	ZH6_S1	0.961244	--	uncharacterized protein LOC100811541 isoform X2 [Glycine max]
arahy.SYJH9Z	0.949323	0.246924	0.160281	0	ZH6_S1	0.739895	--	uncharacterized protein LOC102661124 isoform X2 [Glycine max]
arahy.8Q6BIU	25.2018	0.884483	0.858266	0.342793	ZH6_S1	0.964904	--	short-chain dehydrogenase-reductase B
Novel00225	1.23337	0.362787	0	0	ZH6_S1	0.705858	--	--
arahy.KZ47MP	7.20263	1.04629	0.339927	0.341329	ZH6_S1	0.854734	--	Haloacid dehalogenase-like hydrolase (HAD) superfamily protein
arahy.C7APUF	1.54936	0	0	0	ZH6_S1	1	--	protein HAPLESS 2-like isoform X2 [Glycine max]
arahy.3NX5WZ	2.01734	0.0162034	0	0	ZH6_S1	0.991968	--	major intrinsic protein (MIP) family transporter
arahy.FJ1AK4	927.961	239.276	118.115	57.4662	ZH6_S1	0.742149	--	Methionine S-adenosyl transferase n=1 Tax=Detonula confervacea RepID=B9ZZX3_DETCO
arahy.K7ANH9	1.71063	0	0.33822	0.167941	ZH6_S1	0.802283	--	ROTUNDIFOLIA like 2
arahy.V8KDVK	37.8849	6.3097	5.9662	4.13072	ZH6_S1	0.833451	--	O-acetyltransferase family protein
arahy.8L3EY1	0.113307	0.0376704	0	0	ZH6_S1	0.667536	--	Actin binding protein, putative n=1 Tax=Ricinus communis RepID=B9SA03_RICCO
arahy.ZIY9RH	0.906551	0	0.0503914	0	ZH6_S1	0.944414	--	F-box plant-like protein, putative
arahy.P2PL73	70.2528	3.03233	1.44824	0.444595	ZH6_S1	0.956837	--	probable polygalacturonase-like [Glycine max]
arahy.CC0NGP	3.3648	1.47216	0.512624	0.336748	ZH6_S1	0.562482	--	ATP binding / kinase/ protein serine / threonine kinase n=3 Tax=Vitis vinifera RepID=C5DB47_VITVI
arahy.TZA1ET	14.5631	5.44595	3.06359	3.24975	ZH6_S1	0.626044	--	UV-stimulated scaffold A-like protein
arahy.Z27S6C	0.614691	0.0272258	0.0512738	0	ZH6_S1	0.916586	--	uncharacterized protein LOC100796503 isoform X5 [Glycine max]
arahy.M7A5MM	27.5144	9.15695	8.11548	5.70861	ZH6_S1	0.667194	--	Protein kinase superfamily protein
arahy.MDT0NR	0.785064	0.0227938	0	0.0986924	ZH6_S1	0.874287	--	protein YLS7-like [Glycine max]
Novel01307	2.7965	0.418326	0.0894234	0.0781482	ZH6_S1	0.850411	--	--
arahy.CM19QL	9.71363	4.27676	3.78306	4.49259	ZH6_S1	0.537497	--	F-box family protein
arahy.4F6GHG	1.64185	0.0756694	0	0	ZH6_S1	0.953912	--	putative indole-3-acetic acid-amido synthetase GH3.9
arahy.YQ8SXU	12.4338	0.598697	0.146975	0	ZH6_S1	0.951849	--	short-chain dehydrogenase-reductase B
arahy.NQ31ZP	2.9484	0	0	0	ZH6_S1	1	--	nudix hydrolase homolog 17
arahy.HAI9AH	24.9016	3.4444	1.3962	0.796993	ZH6_S1	0.86168	--	monogalactosyldiacylglycerol synthase 2
arahy.P7YJ1Q	17.863	5.24921	3.26666	2.54293	ZH6_S1	0.70614	--	pleckstrin-like (PH) and lipid-binding START domain protein
arahy.8X0KIE	78.7158	3.82407	7.10597	5.8275	ZH6_S1	0.909726	--	probable glucan 1,3-beta-glucosidase A-like [Glycine max]
arahy.JA6J2D	10.8776	0.018507	0	0	ZH6_S1	0.998299	--	UDP-Glycosyltransferase superfamily protein
Novel02759	5.94331	0.547213	0.327793	0.584833	ZH6_S1	0.901598	--	--
arahy.TZWM8X	0.629302	0	0	0	ZH6_S1	1	--	ACT domain repeat 3
arahy.GP740U	3.41932	0.535571	0.919533	1.45004	ZH6_S1	0.575929	--	uncharacterized protein At4g22758-like isoform X2 [Glycine max]
arahy.42QIIL	94.8238	4.03901	1.36691	0.597145	ZH6_S1	0.957405	--	putative pectinesterase/pectinesterase inhibitor 22 [Glycine max]
arahy.S7A2EF	21.0313	5.72159	0.796651	0.0608385	ZH6_S1	0.727949	--	cytokinin oxidase/dehydrogenase 1
arahy.AYFT4X	15.79	2.30278	1.17077	0.49558	ZH6_S1	0.854162	--	Chalcone-flavanone isomerase family protein
arahy.RY273S	0.749321	0.167754	0	0	ZH6_S1	0.776125	--	Membrane transporter D1 n=3 Tax=Andropogoneae RepID=B6U4Q3_MAIZE
arahy.4F68EX	111.687	46.6188	38.3612	23.971	ZH6_S1	0.582596	--	Galactose oxidase/kelch repeat superfamily protein
arahy.SX2030	1.16878	0	0	0	ZH6_S1	1	--	Mitochondrial ATP synthase subunit G protein
arahy.KFH0Q4	52.6507	0.154505	0.0160156	0.0583142	ZH6_S1	0.997065	--	glucan endo-1,3-beta-glucosidase 12-like [Glycine max]
arahy.Q0H19F	0.698696	0.245435	0.116557	0.138315	ZH6_S1	0.648724	--	LRR and NB-ARC domain disease resistance protein
arahy.03K4CT	4.51729	0.682755	0.752927	0.581753	ZH6_S1	0.833323	--	receptor-like protein kinase 1
arahy.YDB2MQ	2.37195	0.0269627	0.0725415	0.0361423	ZH6_S1	0.969417	--	Protein kinase superfamily protein
arahy.CYY7U9	0.301371	0.129467	0	0.107995	ZH6_S1	0.570405	--	receptor-like protein kinase 2
arahy.980TN7	0.427599	0.0109774	0.0763139	0.0781568	ZH6_S1	0.817219	--	receptor-like protein kinase 4
arahy.5QT5LS	0.589418	0.0640662	0.151362	0	ZH6_S1	0.743201	--	jasmonic acid carboxyl methyltransferase
arahy.HX7ABF	0.354093	0.0437081	0	0	ZH6_S1	0.876563	--	receptor lectin kinase
arahy.JBZ72W	14.972	0.656753	1.10076	0	ZH6_S1	0.926479	--	SAUR-like auxin-responsive protein family
arahy.XL87KG	0.6007	0.21996	0.115965	0	ZH6_S1	0.633827	--	hypothetical protein
arahy.EMV9BJ	0.153606	0	0	0	ZH6_S1	1	--	rho GTPase-activating protein REN1-like isoform X3 [Glycine max]
arahy.W7ZTHA	5.08222	0.692694	0.312115	0	ZH6_S1	0.863702	--	glutathione S-transferase 6
arahy.YHAP2I	144.399	34.1566	15.8716	3.60937	ZH6_S1	0.763456	--	alcohol dehydrogenase 1
arahy.X69TWL	3.58001	1.61642	0.472162	0.0500521	ZH6_S1	0.548489	--	non-specific phospholipase C3
arahy.S28ZE3	5.99452	0.336212	0.361804	0.232568	ZH6_S1	0.939644	HB	homeobox protein knotted-1-like 7-like isoform X2 [Glycine max]
arahy.RRQV4B	2.7989	0.030475	0.0198636	0.0361626	ZH6_S1	0.98708	--	Protein kinase superfamily protein
arahy.BWP7WA	30.1427	0	0	0	ZH6_S1	1	--	Unknown protein
arahy.4H2E4D	75.6444	1.22599	2.30887	2.5837	ZH6_S1	0.965844	--	transmembrane protein, putative
arahy.YM2AH8	403.91	158.528	46.0771	15.8083	ZH6_S1	0.607516	--	ADP,ATP carrier protein 1, mitochondrial-like [Glycine max]
arahy.QC4UQW	13.9755	4.77651	2.13994	1.07084	ZH6_S1	0.658222	--	Cell wall protein-like n=3 Tax=Oryza RepID=Q8H3Y9_ORYSJ
arahy.97W2GY	88.1573	21.474	18.5886	11.524	ZH6_S1	0.756413	--	actin depolymerizing factor 2
arahy.AV6HSI	0.207136	0.0456971	0.0712263	0	ZH6_S1	0.656138	SBP	squamosa promoter-binding-like protein 6-like [Glycine max]
arahy.ETNK13	33.2947	1.27923	2.01172	1.22283	ZH6_S1	0.939578	--	malate dehydrogenase
arahy.SW5XY7	4.82304	0.939973	0.552154	1.50343	ZH6_S1	0.688281	--	uncharacterized protein LOC100806882 isoform X2 [Glycine max]
arahy.EF44XV	0.217031	0	0	0	ZH6_S1	1	--	tryptophan aminotransferase related 2
arahy.LXQN6Z	0.110989	0.0121604	0	0	ZH6_S1	0.890436	--	SMAD/FHA domain-containing protein
arahy.CSQB0P	1.00375	0.119284	0	0	ZH6_S1	0.881161	--	Cytochrome P450 superfamily protein
arahy.N8H2W4	15.9988	0	0	0	ZH6_S1	1	--	SAUR-like auxin-responsive protein family
arahy.BX5EMB	0.170625	0	0	0	ZH6_S1	1	--	NAC domain protein,
arahy.H7N144	2.88002	0.021193	0	0	ZH6_S1	0.992641	--	protein serine/threonine kinases
arahy.CQ14AB	39.3541	0.0749169	0.131708	0.093745	ZH6_S1	0.996653	--	early nodulin-like protein 3-like [Glycine max]
arahy.3D7DCX	1.31093	0.396473	0.106812	0.189565	ZH6_S1	0.697564	--	disease resistance protein (TIR-NBS-LRR class), putative
arahy.XVK42B	3.21036	0.140692	0.0374064	0.124242	ZH6_S1	0.956176	--	glucuronoxylan 4-O-methyltransferase 1-like [Glycine max]
arahy.9M6DNI	37.5816	7.98446	1.27131	0.39248	ZH6_S1	0.787543	--	transmembrane amino acid transporter family protein
arahy.X7YN2B	32.4741	0.50014	0.290875	0.393611	ZH6_S1	0.984599	--	glucan endo-1,3-beta-glucosidase 11-like [Glycine max]
arahy.R2A86L	1.58382	0	0	0	ZH6_S1	1	--	Galactose oxidase/kelch repeat superfamily protein
arahy.3QT14C	1.40353	0	0.147269	0	ZH6_S1	0.895072	--	FASCICLIN-like arabinogalactan-protein 11
arahy.JBT1X5	35.4316	13.082	6.72153	2.92865	ZH6_S1	0.630782	--	Phosphoglycerate mutase family protein
arahy.GP7DSL	2.79366	0.820649	0.723876	0.877342	ZH6_S1	0.685952	--	LRR and NB-ARC domain disease resistance protein, putative
arahy.T4LNKK	21.4263	5.2692	3.08786	2.18945	ZH6_S1	0.754077	--	Hypoxanthine-guanine phosphoribosyltransferase
arahy.T5Y52R	0.236264	0.0364318	0.0539081	0	ZH6_S1	0.771831	--	AMP-dependent synthetase and ligase family protein
arahy.TPY4ZQ	47.1623	0.716265	1.07453	0.596373	ZH6_S1	0.977216	--	S12-like, 30S ribosomal protein S12 subfamily protein
arahy.7A1A6G	7.8663	0.739106	1.102	1.90745	ZH6_S1	0.757516	--	Protein of unknown function (DUF1639)
arahy.KGVY1V	0.290734	0	0	0	ZH6_S1	1	--	P-loop containing nucleoside triphosphate hydrolases superfamily protein
arahy.20WX6S	3.34764	0.035056	0	0	ZH6_S1	0.989528	--	aldo/keto reductase family oxidoreductase
arahy.0UNU52	2.15067	0.0217824	0	0	ZH6_S1	0.989872	--	seed linoleate 9S-lipoxygenase
Novel02541	0.879742	0.0420959	0.0446117	0.0812176	ZH6_S1	0.90768	--	--
arahy.Q8AGNQ	34.8441	14.328	6.32525	5.77837	ZH6_S1	0.588796	--	Clathrin, heavy chain
arahy.GE1SV7	0.869985	0.403147	0.324572	0.303792	ZH6_S1	0.536605	--	D-arabinono-1,4-lactone oxidase family protein
arahy.BEHF6G	37.338	11.9183	8.49779	5.31343	ZH6_S1	0.680799	--	Cytochrome c oxidase, subunit Vib family protein
arahy.TF4B4Y	22.4589	7.62471	1.83704	2.07633	ZH6_S1	0.660504	--	unknown protein
arahy.45SMBX	65.872	15.2438	12.9144	13.8885	ZH6_S1	0.768585	--	kinesin light chain
arahy.1M4EYD	0.466244	0.0948336	0	0.0385047	ZH6_S1	0.796601	--	receptor-like protein kinase 2
arahy.UMIX20	7.28541	0.611344	1.78234	1.82594	ZH6_S1	0.74937	--	pollen-specific protein SF21 [Glycine max]
arahy.A53T08	2.45612	0.737271	0.253145	0.420399	ZH6_S1	0.699823	--	transmembrane protein, putative
arahy.01RPY8	14.7733	3.53411	4.35562	1.74366	ZH6_S1	0.705169	--	Protein of unknown function (DUF581)
arahy.CP887V	17.0223	7.41266	5.72465	4.89697	ZH6_S1	0.564532	--	ubiquitin-conjugating enzyme 5
arahy.6C48SL	6.49301	3.1207	1.39833	0.257346	ZH6_S1	0.519375	--	photosystem II CP43 chlorophyll apoprotein
arahy.KST8W5	24.0504	1.15417	0.840887	0.0850519	ZH6_S1	0.95201	--	RING/U-box superfamily protein
Novel00380	4.12527	0.62074	0.375871	0.56702	ZH6_S1	0.849527	--	--
arahy.FT2DSH	6.0325	1.14373	0.480568	0.21105	ZH6_S1	0.810406	--	FKBP-like peptidyl-prolyl cis-trans isomerase family protein
arahy.029YZL	0.108633	0	0	0	ZH6_S1	1	--	Calcium-binding EF-hand family protein
arahy.I7EQFT	8.7278	2.82692	3.2918	2.72099	ZH6_S1	0.622837	--	Protein kinase superfamily protein
arahy.S79ATY	0.844435	0.184429	0.21006	0	ZH6_S1	0.751242	--	alpha-1,4-glucan-protein synthase [UDP-forming]-like protein
arahy.ZBJ4Q7	3.32661	0.342095	0.207053	0.113568	ZH6_S1	0.897164	--	polyamine oxidase 1
arahy.4T3WK1	0.384399	0	0	0	ZH6_S1	1	--	Unknown protein
arahy.CK11CG	0.690106	0.0622424	0.0251198	0	ZH6_S1	0.909807	--	NAC domain protein,
arahy.H4RR8N	1.86368	0.341691	0.261246	0.0792684	ZH6_S1	0.816658	--	S-norcoclaurine synthase-like protein
arahy.U3WWWH	23.2641	4.18654	4.99779	4.77919	ZH6_S1	0.785172	--	2,3-diketo-5-methylthio-1-phosphopentane phosphatase
arahy.VQPM3J	4.74758	0.148714	0.0238363	0	ZH6_S1	0.968676	--	O-methyltransferase family protein
arahy.NJ1UU6	0.834151	0	0	0	ZH6_S1	1	--	disease resistance protein (TIR-NBS-LRR class), putative
arahy.A6EHAN	4.89743	2.07831	1.25124	0.638112	ZH6_S1	0.575633	bZIP	bZIP family transcription factor
Novel03618	2.25729	0.294923	0.13146	0	ZH6_S1	0.869346	--	--
arahy.JB0HVI	0.410199	0.0784742	0.0277213	0	ZH6_S1	0.808692	--	1-aminocyclopropane-1-carboxylate oxidase homolog 1-like [Glycine max]
arahy.0R79PA	8.36089	0.493958	0.115493	0.100515	ZH6_S1	0.94092	--	NAD(P)-binding Rossmann-fold superfamily protein
arahy.CZ3KL5	67.4069	12.0395	7.91524	6.57195	ZH6_S1	0.82139	--	putative pectinesterase/pectinesterase inhibitor 24-like [Glycine max]
arahy.4V8RU5	1.76082	0	0	0	ZH6_S1	1	--	polygalacturonase-like [Glycine max]
arahy.840CAR	2.55	0.730978	0.596842	0.433717	ZH6_S1	0.713341	--	glycyl-tRNA synthetase/glycine-tRNA ligase
arahy.1T462X	0.675079	0.205929	0.211944	0.108822	ZH6_S1	0.686046	--	cellulose synthase like E1
arahy.9GGB7F	78.4515	5.26204	26.2449	16.3468	ZH6_S1	0.665463	--	UDP-D-glucose/UDP-D-galactose 4-epimerase 1
arahy.79PBA1	0.910481	0.369898	0.136834	0.0679443	ZH6_S1	0.593734	TF	MADS-box transcription factor 6 [Glycine max]
arahy.5QUI8A	72.112	9.81973	6.63421	4.26232	ZH6_S1	0.863827	--	putative glycerol-3-phosphate transporter 1-like isoform X1 [Glycine max]
arahy.90YMMC	10.3516	1.76288	0.367052	0.201319	ZH6_S1	0.8297	--	septum-promoting GTP-binding protein 1-like [Glycine max]
arahy.DT9DNF	1.04742	0.295503	0.207451	0.136183	ZH6_S1	0.717876	--	disease resistance protein (TIR-NBS-LRR class), putative
arahy.L5Q3AX	0.253061	0.111335	0	0	ZH6_S1	0.560046	TF	ethylene-responsive transcription factor 1B
arahy.55PBKN	67.008	0.0837551	0.065273	0.178265	ZH6_S1	0.99734	--	DUF1997 family protein
arahy.QHE7IT	89.9777	42.7386	32.7096	24.2103	ZH6_S1	0.525009	--	Quinone reductase family protein
arahy.NKM11E	46.1278	9.30708	5.62275	4.30317	ZH6_S1	0.798233	--	phosphatidylinositol-4-phosphate 5-kinase 1
arahy.83FN4T	23.4727	1.50109	0.909876	0.147996	ZH6_S1	0.93605	bHLH	transcription factor bHLH13-like [Glycine max]
arahy.27E6QC	738.421	4.66808	7.36708	1.49513	ZH6_S1	0.990023	--	Cell wall protein Exp4 n=1 Tax=Mirabilis jalapa RepID=Q84L38_MIRJA
arahy.5996BE	44.9808	12.7311	9.03204	10.1617	ZH6_S1	0.716966	--	Uncharacterized protein family (UPF0016)
arahy.3K66AC	12.6643	0.0938219	0.122306	0	ZH6_S1	0.990342	--	SAUR-like auxin-responsive protein family
arahy.I3VYS4	24.2261	10.8211	4.46381	3.89484	ZH6_S1	0.553328	--	SEC1 family transport protein SLY1-like [Glycine max]
arahy.D84CI6	4.73269	1.20016	0.172882	0.0726344	ZH6_S1	0.74641	--	Cytochrome P450 superfamily protein
arahy.FU0M5P	1.15925	0.348078	0.0366507	0	ZH6_S1	0.69974	--	uncharacterized protein LOC100810515 [Glycine max]
arahy.LR3XS4	0.150841	0	0	0	ZH6_S1	1	--	Cytochrome P450 superfamily protein
arahy.GA90U3	28.052	13.5901	5.9325	1.98872	ZH6_S1	0.515539	--	prephenate dehydrogenase family protein
arahy.K4IKSC	13.0318	2.44238	1.8129	0.781154	ZH6_S1	0.812584	--	Protein kinase superfamily protein
arahy.0C9UPH	1.15715	0.0347424	0	0	ZH6_S1	0.969976	--	ATP-binding ABC transporter
arahy.NFUI4Q	6.51846	3.01075	2.41885	2.56233	ZH6_S1	0.53812	--	hypothetical protein
arahy.TNI8I7	18.3932	8.5396	6.8264	5.05607	ZH6_S1	0.535719	--	F-box protein interaction domain protein
arahy.90TW9W	0.625614	0	0	0	ZH6_S1	1	--	Unknown protein
arahy.H03I4T	13.0683	2.58588	2.42914	1.87881	ZH6_S1	0.802126	--	Core-2/I-branching beta-1,6-N-acetylglucosaminyltransferase family protein
arahy.Q5UK0W	23.7471	10.4238	7.13408	2.24981	ZH6_S1	0.561051	--	FASCICLIN-like arabinogalactan protein 16 precursor
arahy.I42E36	0.457565	0.03604	0	0	ZH6_S1	0.921235	TF	MYB transcription factor MYB185 [Glycine max]
arahy.7DG5CM	0.590058	0.105423	0.202747	0.0346049	ZH6_S1	0.656394	--	aldehyde dehydrogenase family 3 member F1 [Glycine max]
arahy.3R1ZZ8	56.075	25.212	11.2103	7.78321	ZH6_S1	0.550388	--	Dihydrolipoyllysine-residue succinyltransferase component of 2-oxoglutarate dehydrogenase complex n=3 Tax=Papilionoideae RepID=G7K3L9_MEDTR
Novel00132	0.505438	0	0.0325906	0	ZH6_S1	0.93552	--	--
arahy.77R9Y6	0.143837	0.0166007	0.0432813	0.0718774	ZH6_S1	0.500284	--	ATP synthase subunit A
arahy.W5QVW0	14.0621	5.08699	2.39992	1.42306	ZH6_S1	0.638248	--	pleckstrin-like (PH) and lipid-binding START domain protein
arahy.BX8PA5	786.432	126.175	96.893	59.597	ZH6_S1	0.83956	--	plasma membrane intrinsic protein 1B
arahy.54PPAU	88.4395	18.1808	32.8731	28.8768	ZH6_S1	0.628299	--	lysine-ketoglutarate reductase/saccharopine dehydrogenase
arahy.GDAP1Y	2.4156	0.680922	0.175098	0.0531289	ZH6_S1	0.718114	--	disease-resistance response protein
arahy.5C4XQ1	177.569	75.3538	49.7375	43.442	ZH6_S1	0.575636	--	rapid alkalinization factor 1
arahy.TS3HWZ	30.1255	12.7735	4.41341	3.43095	ZH6_S1	0.57599	--	ABC transporter family protein (ATP-binding component)
arahy.PE1JEE	0.537238	0.093532	0.0826205	0	ZH6_S1	0.825902	--	polygalacturonase QRT3-like [Glycine max]
arahy.DP3R7M	28.5434	3.84457	1.95154	0.924834	ZH6_S1	0.865308	--	glucan endo-1,3-beta-glucosidase 1-like [Glycine max]
arahy.LRYK2A	1.69905	0.012084	0.0128062	0	ZH6_S1	0.992463	--	receptor-like protein kinase 2
arahy.N0MV1J	76.5857	0.680088	0.269053	0.175941	ZH6_S1	0.99112	--	Transmembrane amino acid transporter family protein
Novel01156	0.310549	0	0.0767167	0.139666	ZH6_S1	0.55026	--	--
arahy.BL92CI	1.25775	0	0	0	ZH6_S1	1	--	uncharacterized protein LOC102668673 isoform X2 [Glycine max]
arahy.1HE4TQ	37.6209	10.9743	6.50995	4.50347	ZH6_S1	0.708292	--	transmembrane 9 superfamily member 4-like [Glycine max]
arahy.AJY7W8	69.7334	33.6068	8.11922	5.0371	ZH6_S1	0.518068	--	Cysteine proteinases superfamily protein
arahy.L0ANC4	25.7953	6.13802	3.83657	2.81833	ZH6_S1	0.762049	--	ATP-binding ABC transporter
arahy.CG3D8R	13.2521	3.87468	2.17993	1.61235	ZH6_S1	0.707618	--	NADH-ubiquinone oxidoreductase chain n=3 Tax=Pentapetalae RepID=G7I8V1_MEDTR
arahy.V5CRDX	20.4142	5.02357	1.15834	0.0965902	ZH6_S1	0.753917	--	uncharacterized protein LOC100779101 isoform X2 [Glycine max]
arahy.5P0VXH	1.02549	0	0	0	ZH6_S1	1	--	probable sugar phosphate/phosphate translocator [Glycine max]
arahy.H5YHMD	0.417242	0.199452	0.138097	0	ZH6_S1	0.521976	--	FASCICLIN-like arabinogalactan-protein 11
arahy.87CALG	0.132566	0	0	0	ZH6_S1	1	--	Unknown protein
arahy.7E2RQS	0.177047	0	0	0.0454173	ZH6_S1	0.743474	--	uncharacterized protein LOC100819752 isoform X7 [Glycine max]
arahy.06I94X	0.699272	0.339397	0.0914253	0.153081	ZH6_S1	0.514642	--	Plant protein of unknown function (DUF946)
arahy.K9Y2CB	1.21714	0.0350029	0.0545577	0	ZH6_S1	0.955176	--	Pectate lyase family protein
arahy.YNET3T	0.100308	0	0	0	ZH6_S1	1	--	L-type lectin-domain containing receptor kinase IX.1-like [Glycine max]
arahy.KH6B5H	7.98198	1.28315	0.971188	0.226802	ZH6_S1	0.839244	--	F-box/RNI-like superfamily protein
arahy.40LWFJ	3.15416	0.208341	0.71741	0.651856	ZH6_S1	0.772551	--	serine/threonine protein kinase 1
arahy.L3I3WK	0.541946	0	0	0	ZH6_S1	1	--	uncharacterized protein LOC102659758 [Glycine max]
arahy.QBTG1H	4.68372	1.7112	0.622919	0.390946	ZH6_S1	0.634649	--	ubiquitin-conjugating enzyme 23
arahy.7U017G	2.14331	0.0574705	0	0.0249795	ZH6_S1	0.973186	--	seed linoleate 9S-lipoxygenase
arahy.8M77KD	0.384534	0.131326	0.114121	0	ZH6_S1	0.65848	--	disease-resistance response protein
arahy.Y5HWJY	2.66636	0	0.0179625	0	ZH6_S1	0.993263	--	polyphenol oxidase A1, chloroplastic-like [Glycine max]
arahy.763IQV	2.64075	0.758703	0.0875489	0	ZH6_S1	0.712694	--	GDSL-like Lipase/Acylhydrolase superfamily protein
arahy.V3YXUH	125.688	0.274211	0.0781284	0.0266717	ZH6_S1	0.997818	--	MATE efflux family protein
arahy.2Z587T	127.038	61.9825	60.6809	27.2495	ZH6_S1	0.512096	--	DCD (Development and Cell Death) domain protein
Novel03141	36.483	6.86214	14.1563	13.3114	ZH6_S1	0.611975	--	--
arahy.QSS1IG	5.98566	1.02504	1.12918	1.30381	ZH6_S1	0.782178	--	ATP-binding/protein serine/threonine kinase [Glycine max]
Novel00823	21.6035	3.62839	3.13477	0.220102	ZH6_S1	0.832046	--	--
arahy.EEUI5F	3.79482	0.127366	0.47338	0.212231	ZH6_S1	0.875256	--	sucrose phosphate synthase 3F
arahy.2F2W1G	40.2837	12.7616	4.5641	2.34694	ZH6_S1	0.683207	--	probable methyltransferase PMT2-like [Glycine max]
arahy.X51F92	3.22117	0.422463	0.292281	0.40988	ZH6_S1	0.868848	--	lysosomal beta glucosidase-like isoform X2 [Glycine max]
arahy.NBD2TE	12.8817	1.30408	2.02537	2.18794	ZH6_S1	0.830152	--	Chloroplast-targeted copper chaperone protein
arahy.635IPP	0.734647	0.0653717	0.0340874	0	ZH6_S1	0.911016	--	alpha/beta-hydrolase superfamily protein
arahy.W8ALCK	3.48042	0.102877	0.0447033	0.0813844	ZH6_S1	0.970441	--	HXXXD-type acyl-transferase family protein
arahy.U8R2BF	1.26882	0.105377	0.0754755	0	ZH6_S1	0.916949	--	zinc induced facilitator-like 1
arahy.H5UTXB	18.0335	5.5758	0.782306	0.306298	ZH6_S1	0.690809	--	diphosphate--fructose-6-phosphate 1-phosphotransferase n=1 Tax=Proteiniphilum acetatigenes RepID=UPI0003652DBE
Novel01026	17.0555	7.3473	5.03801	4.16471	ZH6_S1	0.569213	--	--
arahy.8WED6E	10.7346	0	0.0415732	0	ZH6_S1	0.996127	--	Protein kinase superfamily protein
arahy.VNB45H	5.73708	2.67335	1.94727	1.71861	ZH6_S1	0.534022	--	alpha/beta-hydrolase superfamily protein
arahy.DZ04CN	5.36369	0.809244	0.522666	0.322074	ZH6_S1	0.849125	--	UBX domain-containing protein
arahy.LF73V2	40.8868	0.465278	0.184871	0.189335	ZH6_S1	0.98862	--	F-box family protein
arahy.B7V00M	4.85873	2.4073	1.62208	1.43355	ZH6_S1	0.504541	--	uncharacterized protein LOC100788941 isoform X2 [Glycine max]
arahy.EYAH79	7.47244	0	0	0	ZH6_S1	1	--	unknown protein
arahy.28H6X3	41.6923	7.66115	3.78886	2.31678	ZH6_S1	0.816245	--	Protein of Unknown Function (DUF239)
arahy.JJV6C7	42.8445	8.33146	7.64728	6.07354	ZH6_S1	0.805542	--	Eukaryotic aspartyl protease family protein
arahy.52UZQ5	0.44379	0.0773162	0	0	ZH6_S1	0.825782	--	Unknown protein
arahy.H1BIFD	61.3367	9.92335	8.9451	8.95339	ZH6_S1	0.838215	--	RNA-binding protein 1-like [Glycine max]
arahy.GUVP28	0.297817	0.07557	0.126377	0.0353982	ZH6_S1	0.575655	--	translation initiation factor eIF-2B delta subunit
arahy.F3FSDQ	0.989045	0.0128728	0	0	ZH6_S1	0.986985	--	sucrose transporter 4
arahy.M8R2T1	19.5125	0	0	0	ZH6_S1	1	--	S-ribonuclease n=5 Tax=Prunus RepID=A8R5J7_PRUMU
arahy.WNMX7W	112.975	2.83159	2.45295	0.369089	ZH6_S1	0.974936	--	putative indole-3-acetic acid-amido synthetase GH3.9
arahy.BFGJ0Y	1.10942	0.061188	0.0953715	0.0919574	ZH6_S1	0.914035	C2H2	triacylglycerol lipase-like 1
arahy.5B6ZAR	0.35749	0.0168384	0	0	ZH6_S1	0.952898	TF	MADS-box transcription factor 17-like [Glycine max]
arahy.VH3KGW	3.73523	0.301055	0.352858	0.648275	ZH6_S1	0.826443	--	Senescence/dehydration-associated protein-related
arahy.01D2LU	21.8344	7.6885	6.09435	6.34104	ZH6_S1	0.647873	--	U-box domain-containing protein 12-like isoform X3 [Glycine max]
arahy.MV6I8X	18.1681	7.74329	5.62126	3.79149	ZH6_S1	0.573796	--	protein serine/threonine phosphatases
Novel01306	108.629	14.7108	4.40243	1.27528	ZH6_S1	0.864577	--	--
arahy.MPCU6S	11.9793	5.56836	3.51796	3.14347	ZH6_S1	0.535166	--	ADP-ribosylation factor GTPase-activating protein AGD3-like [Glycine max]
arahy.18Y7ZR	0.379789	0.175746	0	0	ZH6_S1	0.537255	--	Unknown protein
arahy.VJ8A09	0.176144	0.0622527	0	0	ZH6_S1	0.646581	--	GDSL-like Lipase/Acylhydrolase superfamily protein
arahy.J6ELEK	11.0596	2.23223	2.79838	2.33715	ZH6_S1	0.746972	--	Protein phosphatase 2C family protein
arahy.7VP0DB	2.4318	0.47234	0.154574	0.183499	ZH6_S1	0.805765	--	calcium-transporting ATPase 8, plasma membrane-type protein
arahy.SB83T1	6.2595	0.187532	0.0143353	0	ZH6_S1	0.97004	--	beta-fructofuranosidase
arahy.JE3RIW	1.10399	0.169004	0.190957	0	ZH6_S1	0.827031	TF	ethylene-responsive transcription factor 13-like [Glycine max]
arahy.ZWND97	31.5765	14.3259	7.43844	5.82785	ZH6_S1	0.546312	--	phosphatidylinositol transfer protein CSR1-like [Glycine max]
arahy.J0HSVP	292.915	33.8084	59.1215	32.5752	ZH6_S1	0.798162	--	plasma membrane intrinsic protein 2
Novel00929	0.721431	0.2831	0.192959	0.117241	ZH6_S1	0.607586	--	--
arahy.Q25QIN	8.78733	0.407688	0.30566	0.19645	ZH6_S1	0.953605	--	trafficking protein particle complex subunit-like protein
Novel01646	1.13222	0.0823354	0.0816643	0.0581259	ZH6_S1	0.92728	--	--
arahy.GQT8P7	1.65677	0.674366	0.282235	0.299281	ZH6_S1	0.592964	--	zinc finger CCCH domain-containing protein 48-like isoform X2 [Glycine max]
Novel03381	1.40609	0.027221	0	0	ZH6_S1	0.980641	AP2-EREBP	--
arahy.MQC2P6	26.1874	2.32359	4.13546	4.52913	ZH6_S1	0.82705	C2C2-Dof	DOF zinc finger protein 1
arahy.E2YHWJ	0.838619	0.131374	0	0	ZH6_S1	0.843345	--	Flavin-binding monooxygenase family protein
arahy.2B7LY6	0.492985	0	0	0	ZH6_S1	1	--	UDP-Glycosyltransferase superfamily protein
arahy.Q2LN0H	0.868325	0.068476	0	0	ZH6_S1	0.92114	--	serine carboxypeptidase-like 48-like [Glycine max]
Novel02272	0.271268	0.0447231	0.0552923	0	ZH6_S1	0.796171	--	--
arahy.92S4AT	4.65859	1.92554	1.44596	1.78407	ZH6_S1	0.586668	--	Patatin-like phospholipase family protein
arahy.FE00XT	0.115894	0	0	0	ZH6_S1	1	--	receptor-like serine/threonine kinase 2
arahy.2U24C8	0.645023	0.0212081	0.0117891	0	ZH6_S1	0.96712	--	Peroxidase superfamily protein
arahy.438RTV	5.17303	0.919182	0.312933	0.578207	ZH6_S1	0.822313	--	uncharacterized membrane protein At3g27390-like [Glycine max]
arahy.G6F8T8	1.12941	0	0.0139793	0	ZH6_S1	0.987622	--	alkaline/neutral invertase
arahy.4IBX4Q	0.459753	0	0.0513106	0	ZH6_S1	0.888395	--	chalcone synthase [Glycine max]
arahy.N91VU8	0.897532	0	0.162466	0	ZH6_S1	0.818985	--	Unknown protein
arahy.LV0WMB	25.5423	5.47661	3.7813	4.967	ZH6_S1	0.785587	--	short-chain dehydrogenase/reductase
arahy.KJ11LV	16.3556	5.75007	3.36214	0.505257	ZH6_S1	0.648435	--	NADH-ubiquinone oxidoreductase chain n=3 Tax=Mesangiospermae RepID=G7I8X8_MEDTR
arahy.Z1WCUM	43.1555	8.78382	6.52328	5.18825	ZH6_S1	0.796461	--	Pectate lyase family protein
arahy.E295CW	276.924	14.2327	8.86778	6.40567	ZH6_S1	0.948604	--	Lipid transfer protein
Novel01398	67.8679	18.3397	2.43795	0.554406	ZH6_S1	0.729773	--	--
arahy.1V4JC0	0.15428	0.0702992	0	0	ZH6_S1	0.544341	--	UPF0481 protein [Glycine max]
arahy.8WE36P	34.2246	13.892	12.824	9.77054	ZH6_S1	0.594092	--	clathrin coat assembly protein AP180-like [Glycine max]
arahy.G1B0F8	0.893803	0	0.0952063	0	ZH6_S1	0.893482	--	uncharacterized protein LOC102668158 [Glycine max]
arahy.HKB63Q	24.434	8.01147	5.7795	1.78992	ZH6_S1	0.672118	--	TPX2 (targeting protein for Xklp2) protein family
arahy.RC1NFA	10.4259	0	0	0	ZH6_S1	1	--	organ-specific protein S2-like isoform X1 [Glycine max]
arahy.V31KAL	5.02127	0.375874	0.204875	0.167118	ZH6_S1	0.925144	--	GDSL-like Lipase/Acylhydrolase superfamily protein
arahy.DY9DHP	0.743547	0	0	0	ZH6_S1	1	TF	putative transcription factor bHLH086-like [Glycine max]
arahy.HFN0DS	29.9245	0.307146	0	0	ZH6_S1	0.989736	--	SAUR-like auxin-responsive protein family
Novel01419	8.84596	0.147104	0.0898598	0.173286	ZH6_S1	0.980411	--	--
arahy.CU0EG8	29.6062	9.81058	7.36567	7.57367	ZH6_S1	0.668631	--	ataxin-3 homolog isoform X1 [Glycine max]
Novel02525	2.53067	0.650573	0.314105	0.263935	ZH6_S1	0.742925	--	--
arahy.YRMJ3W	30.8279	10.9586	6.97767	5.80948	ZH6_S1	0.644524	--	alpha/beta-Hydrolases superfamily protein
arahy.T7FQKJ	516.916	1.66618	3.56588	1.72061	ZH6_S1	0.993102	--	asparagine synthetase 3
arahy.BH9RMT	0.212244	0.0134854	0	0	ZH6_S1	0.936463	--	Cytochrome P450 superfamily protein
arahy.KXLH0Y	8.88076	1.51511	2.80859	1.75882	ZH6_S1	0.683744	--	Calmodulin-binding protein
arahy.8F9XT7	34.3152	3.69487	2.36399	1.92429	ZH6_S1	0.892325	--	n=3 Tax=Oryza sativa RepID=Q7XUY4_ORYSJ
arahy.QYN4RG	1.0544	0	0.0156622	0	ZH6_S1	0.985146	--	1-aminocyclopropane-1-carboxylate synthase 9
arahy.2U4GNC	0.821323	0.0291525	0.0308947	0.158859	ZH6_S1	0.806581	--	extradiol ring-cleavage dioxygenase-like [Glycine max]
arahy.WSF6G4	1.82193	0	0	0	ZH6_S1	1	--	Protein kinase superfamily protein
arahy.2U7QKV	28.5646	12.0752	8.10279	8.63269	ZH6_S1	0.577265	--	Myosin heavy chain-related protein
arahy.ELD72T	0.36268	0	0	0	ZH6_S1	1	--	Late embryogenesis abundant (LEA) hydroxyproline-rich glycoprotein family
arahy.TIY3DH	65.5785	8.41689	2.89838	3.38152	ZH6_S1	0.871652	--	3-ketoacyl-CoA synthase 4
arahy.TX3Z3S	7.69613	0.277076	0.0245717	0.0223669	ZH6_S1	0.963998	--	sulfate transporter 3
arahy.4AY3MY	0.233014	0.098568	0.0273958	0	ZH6_S1	0.576986	--	Sterile alpha motif (SAM) domain-containing protein
arahy.LCD1IS	0.542048	0.022558	0	0	ZH6_S1	0.958384	--	2-oxoglutarate (2OG) and Fe(II)-dependent oxygenase superfamily protein
arahy.CRN88C	18.6655	4.65948	2.29828	1.59349	ZH6_S1	0.750369	--	nucleotide sugar transporter-KT 1
arahy.FZD5QZ	6.82856	1.2564	2.04423	1.91958	ZH6_S1	0.700636	--	Protein kinase superfamily protein
arahy.644STB	54.2306	11.0152	16.2403	13.7364	ZH6_S1	0.700533	--	Protein phosphatase 2C family protein
Novel04086	3.68955	1.00915	0.917913	0.532404	ZH6_S1	0.726483	AP2-EREBP	--
arahy.VH20NJ	13.0288	1.92944	1.29282	0.113891	ZH6_S1	0.85191	--	plant invertase/pectin methylesterase inhibitor protein
arahy.SLB9HH	196.092	1.57355	3.8602	3.95694	ZH6_S1	0.979821	--	GDSL-like Lipase/Acylhydrolase superfamily protein
arahy.EG32KL	0.258677	0	0	0	ZH6_S1	1	--	AMP deaminase, putative / myoadenylate deaminase, putative
arahy.X6RF7Y	55.3556	0	0.114682	0	ZH6_S1	0.997928	Tify	jasmonate-zim-domain protein 1
arahy.X1KTL2	55.4297	14.3766	13.6675	6.87969	ZH6_S1	0.740634	--	uncharacterized protein At1g04910-like [Glycine max]
Novel03137	76.7292	0.661835	0.561084	0.509968	ZH6_S1	0.991374	--	--
arahy.MNG1Z1	6.33018	2.71272	1.15736	0.670818	ZH6_S1	0.571463	--	IAA-amino acid hydrolase ILR1-like 4-like [Glycine max]
arahy.4JBV7I	0.144051	0	0	0	ZH6_S1	1	--	probable pectinesterase/pectinesterase inhibitor 17-like [Glycine max]
arahy.ZUC4D4	0.856047	0	0.050201	0.174762	ZH6_S1	0.79585	--	unknown protein
arahy.FCS600	2.22636	0.0510748	0	0.082733	ZH6_S1	0.962839	C2C2-Dof	Dof-type zinc finger DNA-binding family protein
arahy.QBCT0C	0.222615	0.0256928	0	0	ZH6_S1	0.884586	--	isoflavone reductase homolog [Glycine max]
arahy.V89RV5	150.432	9.19839	4.11339	5.38103	ZH6_S1	0.938854	--	Gibberellin-regulated family protein
arahy.WJIQ4A	0.340196	0.0608043	0	0	ZH6_S1	0.821267	--	Cytochrome P450 superfamily protein
arahy.1Q2Y3Q	0.15585	0	0	0	ZH6_S1	1	--	sulfate transporter 91
arahy.NAS7CZ	0.149608	0.0634188	0.0734803	0.0501699	ZH6_S1	0.508849	--	ubiquitin carboxyl-terminal hydrolase 12-like [Glycine max]
arahy.01T93A	19.1379	0.574974	0.207338	0	ZH6_S1	0.969956	--	uncharacterized protein LOC100820059 isoform X2 [Glycine max]
arahy.ZRKH1E	29.8336	4.15955	1.3951	0.549141	ZH6_S1	0.860575	--	protein LONGIFOLIA 2-like isoform X2 [Glycine max]
arahy.7SZ544	44.576	0.134757	0	0.261137	ZH6_S1	0.994142	--	DUF1997 family protein
arahy.XX9FKE	8.97356	0.0168576	0.0219756	0	ZH6_S1	0.997551	--	O-methyltransferase family protein
arahy.BRV8TD	0.419591	0.0700119	0	0	ZH6_S1	0.833143	--	type I inositol 1,4,5-trisphosphate 5-phosphatase CVP2-like [Glycine max]
arahy.UPL4LC	6.09365	2.65704	2.10202	0.679895	ZH6_S1	0.563966	--	Defensin MtDef4.6
arahy.LP0WMI	0.194497	0	0	0	ZH6_S1	1	--	3-ketoacyl-CoA synthase 2
arahy.V6JT5K	0.125672	0.0595102	0.0273499	0	ZH6_S1	0.526464	--	O-methyltransferase 1
arahy.G01LXB	0.606458	0	0.20949	0	ZH6_S1	0.654569	--	Eukaryotic aspartyl protease family protein
arahy.LTG2DU	0.77021	0.0444946	0	0	ZH6_S1	0.942231	--	plant/mmn10-180 protein
arahy.ZR1PS1	190.286	67.1361	19.4112	11.5836	ZH6_S1	0.647184	--	mitochondrial phosphate carrier protein 3, mitochondrial-like [Glycine max]
arahy.J6C6I8	0.353279	0.148816	0.0115432	0	ZH6_S1	0.578757	--	Oxysterol-binding family protein
arahy.8UAX1T	0.19846	0.0799989	0	0	ZH6_S1	0.596901	--	glyceraldehyde-3-phosphate dehydrogenase C2
arahy.2Z5Q4T	0.164815	0	0	0	ZH6_S1	1	--	probable 2-oxoglutarate/Fe(II)-dependent dioxygenase-like [Glycine max]
arahy.BII4R6	12.8266	2.68445	5.48729	2.81044	ZH6_S1	0.572193	bZIP	cellulose synthase 1
arahy.924ZJS	12.4199	2.25473	1.90465	0.651599	ZH6_S1	0.818458	--	Zinc finger (C3HC4-type RING finger) family protein
arahy.W2FYD0	2.64239	0.692228	0.178274	0.0763941	ZH6_S1	0.73803	--	ammonium transporter 2
arahy.9RJM5Z	11.1882	3.72613	2.77001	1.81455	ZH6_S1	0.666958	--	F-box protein At2g27310-like isoform X1 [Glycine max]
arahy.MD79KS	1.29473	0	0	0	ZH6_S1	1	--	disease-resistance response protein
arahy.52F34X	0.630103	0.196911	0	0	ZH6_S1	0.687494	--	serine carboxypeptidase-like 9
arahy.5JIN69	18.8011	0.774649	0.855677	0.770408	ZH6_S1	0.954488	--	unknown protein
arahy.TL4KP4	15.0631	2.11558	1.11028	1.34122	ZH6_S1	0.859552	C2C2-Dof	dof zinc finger protein DOF5.6 [Glycine max]
arahy.KV8E85	1.11299	0.146355	0	0	ZH6_S1	0.868504	--	methyltransferase type 11
arahy.T39577	0.359734	0	0	0	ZH6_S1	1	TF	myb transcription factor
arahy.D1NLS5	9.65454	0.0611732	0	0	ZH6_S1	0.993664	--	aldo/keto reductase family oxidoreductase
arahy.NF83JW	13.6299	0.726729	0.161409	0.0826477	ZH6_S1	0.946681	--	uncharacterized protein LOC100800595 isoform X4 [Glycine max]
arahy.AIAB9F	0.30808	0.0147014	0	0.0517476	ZH6_S1	0.832032	--	peptide transporter 3
arahy.F35YNL	0.101677	0	0	0	ZH6_S1	1	--	Sugar transporter SWEET n=2 Tax=Phaseoleae RepID=I1KC00_SOYBN
arahy.AMIM7J	16.7619	0.0207715	0	0	ZH6_S1	0.998761	bHLH	transcription factor BEE 3-like [Glycine max]
arahy.0X9YMY	16.5873	4.30736	0	0	ZH6_S1	0.740322	--	NADH dehydrogenase subunit 7, putative
arahy.8KGI2U	4.26982	0.0369965	0.201835	0.0787434	ZH6_S1	0.95273	--	unknown protein
arahy.WQZ5HT	1.89196	0.022558	0	0	ZH6_S1	0.988077	--	short-chain dehydrogenase-reductase B
arahy.CK3BIN	0.253353	0.04028	0	0	ZH6_S1	0.841012	--	uncharacterized protein At1g04910-like isoform X1 [Glycine max]
arahy.6Q00VM	1.04197	0	0.518345	0	ZH6_S1	0.502535	--	uncharacterized protein At3g17950-like isoform X2 [Glycine max]
arahy.P4LK2T	57.9028	6.22678	4.83902	2.46857	ZH6_S1	0.892461	--	tryptophan aminotransferase related 2
arahy.DG8AQJ	0.931127	0	0	0	ZH6_S1	1	TCP	transcription factor CYCLOIDEA-like isoform X3 [Glycine max]
arahy.RB6D27	3.45377	0	0.0281273	0	ZH6_S1	0.991856	--	Protein of unknown function, DUF642
arahy.ZECT0Q	0.286875	0.0586337	0	0	ZH6_S1	0.795612	--	calmodulin-binding receptor-like cytoplasmic kinase 3
arahy.G51199	13.368	3.3836	4.50473	3.57059	ZH6_S1	0.663021	--	probable xyloglucan glycosyltransferase 12-like [Glycine max]
arahy.A0WXBW	0.164122	0	0	0	ZH6_S1	1	--	Cytochrome P450 superfamily protein
arahy.1B8730	12.7955	3.19282	2.32569	2.20924	ZH6_S1	0.750472	--	uncharacterized protein LOC100779951 isoform X1 [Glycine max]
arahy.A0TJ2P	2.11766	0.845479	0.515823	0.277664	ZH6_S1	0.600749	--	enhanced disease susceptibility protein
arahy.L1RKW0	1.53524	0.441603	0.23994	0.178711	ZH6_S1	0.712355	--	FKBP-like peptidyl-prolyl cis-trans isomerase family protein
arahy.41EQ73	0.294516	0.011684	0	0	ZH6_S1	0.960328	--	heat shock protein 70
arahy.M8MQLJ	27.7369	3.2885	2.69143	1.2965	ZH6_S1	0.88144	--	ATP binding microtubule motor family protein
arahy.M6T21B	2.46149	0.482092	1.11432	0.425544	ZH6_S1	0.547299	--	receptor-like protein kinase 4
arahy.M92GQT	0.590636	0.028244	0	0	ZH6_S1	0.95218	--	GDSL-like Lipase/Acylhydrolase superfamily protein
arahy.AQ061J	20.1047	2.01944	2.02961	2.49337	ZH6_S1	0.875981	--	ADP-ribosylation factor GTPase-activating protein AGD10
Novel03501	489.291	92.5573	42.786	46.3811	ZH6_S1	0.810834	--	--
arahy.PB3V0K	0.63972	0.121265	0.0978985	0	ZH6_S1	0.81044	--	mitochondrial outer membrane protein porin 1-like [Glycine max]
arahy.V42Y99	1.63249	0	0	0	ZH6_S1	1	--	anthocyanin 5-aromatic acyltransferase-like [Glycine max]
arahy.H8W5PF	0.546672	0	0	0	ZH6_S1	1	--	Acyl-ACP thioesterase
arahy.THM2IN	3.06325	0.424799	0.0605666	0.0236293	ZH6_S1	0.861324	--	F-box/RNI-like superfamily protein
arahy.411K7N	11.0161	0.744582	1.94138	1.17392	ZH6_S1	0.823769	--	Mechanosensitive ion channel family protein
arahy.X6BMED	4.08929	0	0	0	ZH6_S1	1	--	Late embryogenesis abundant (LEA) hydroxyproline-rich glycoprotein family
arahy.C5GSRL	0.548421	0	0	0	ZH6_S1	1	--	hypothetical protein
Novel02041	3.12855	1.4012	0.27577	0	ZH6_S1	0.552124	--	--
arahy.717FF7	0.347148	0	0	0	ZH6_S1	1	--	2-oxoglutarate (2OG) and Fe(II)-dependent oxygenase superfamily protein
arahy.Q6N5X0	41.7408	6.0933	8.98722	7.02755	ZH6_S1	0.78469	--	Protein kinase superfamily protein
arahy.3ELH3Y	0.739264	0	0	0	ZH6_S1	1	--	Pyridoxal phosphate (PLP)-dependent transferases superfamily protein n=1 Tax=Theobroma cacao RepID=UPI00042B3A8C
arahy.47SLDE	77.1939	3.27107	7.45115	6.58713	ZH6_S1	0.903475	--	putative indole-3-acetic acid-amido synthetase GH3.9
arahy.87R1SX	3.50867	1.34307	0.362013	0.0449367	ZH6_S1	0.617215	--	Cytochrome P450 superfamily protein
arahy.J8HGUJ	15.9268	3.64724	2.09445	1.86127	ZH6_S1	0.771	--	Protein kinase superfamily protein
arahy.FXAX6R	34.1932	7.41844	2.27118	0.995733	ZH6_S1	0.783043	--	pyruvate dehydrogenase E1 component, alpha subunit
arahy.PW04T0	61.8204	0.503021	0.131148	0	ZH6_S1	0.991863	--	SAUR-like auxin-responsive protein family
arahy.YJK833	19.0905	5.15405	2.10037	3.44485	ZH6_S1	0.730021	--	DOMON domain-containing protein / dopamine beta-monooxygenase N-terminal domain-containing protein
arahy.YX67LP	34.2706	8.07632	4.14045	1.61418	ZH6_S1	0.764337	--	protein PLANT CADMIUM RESISTANCE 2-like [Glycine max]
arahy.XDAI2B	2.38	0.375497	0.019906	0.163079	ZH6_S1	0.842228	--	calcium-transporting ATPase 8, plasma membrane-type protein
Novel03842	0.200335	0.069582	0.0530126	0	ZH6_S1	0.652672	--	--
arahy.D0UR3R	4.12462	0.193681	0.290713	0.319797	ZH6_S1	0.922466	--	diacylglycerol kinase 5
arahy.4U54KW	0.481263	0.0368015	0	0	ZH6_S1	0.923531	--	late embryogenesis abundant protein
arahy.56TCJ2	43.6439	0.592381	0.0572908	0	ZH6_S1	0.986427	--	plant invertase/pectin methylesterase inhibitor protein
arahy.RU54A6	17.0363	5.69189	6.57343	4.90066	ZH6_S1	0.614151	--	Calcium-dependent lipid-binding (CaLB domain) family protein
arahy.CZ7D1D	1.83312	0	0	0	ZH6_S1	1	C2C2-YABBY	YABBY transcription factor
arahy.DD0TCJ	10.0791	3.50915	1.91716	0.893953	ZH6_S1	0.651837	G2-like	two-component response regulator-like APRR2-like isoform X1 [Glycine max]
arahy.DR8B4W	12.4707	5.00379	2.26355	2.82453	ZH6_S1	0.598757	--	probable polygalacturonase [Glycine max]
arahy.NA5G54	1.27775	0.0573344	0.225883	0.0518507	ZH6_S1	0.823218	WRKY	WRKY family transcription factor
arahy.XL2WLX	0.20959	0	0	0.0446533	ZH6_S1	0.786949	--	type I inositol 1,4,5-trisphosphate 5-phosphatase CVP2-like [Glycine max]
arahy.52TI3X	41.6902	4.91961	2.56423	0.47695	ZH6_S1	0.881996	--	L-ascorbate oxidase homolog [Glycine max]
Novel03564	0.849584	0.241403	0.322449	0	ZH6_S1	0.620463	--	--
arahy.8KG9MP	333.228	112.788	41.3936	28.2457	ZH6_S1	0.66153	--	conserved peptide upstream open reading frame 9
Novel01694	13.5194	0	0	0.13095	ZH6_S1	0.990314	--	--
arahy.JE8UNX	0.328449	0	0	0	ZH6_S1	1	--	Heavy metal transport/detoxification superfamily protein
Novel04367	1.2221	0	0	0	ZH6_S1	1	--	--
arahy.R9W6MW	3.5334	0	0.0511045	0	ZH6_S1	0.985537	--	protein YLS9-like [Glycine max]
arahy.BHHB36	4.54676	0.684098	0.0847101	0	ZH6_S1	0.849542	--	LURP-one-like protein
arahy.ZDHF3I	18.7258	1.64229	0.433395	0.109605	ZH6_S1	0.912298	--	fatty acid desaturase 8
arahy.3ZDQ4J	251.944	56.7176	57.7021	65.2069	ZH6_S1	0.741185	--	lipid transfer protein
arahy.WK29PC	28.7039	0.117535	0	0.0568912	ZH6_S1	0.995905	--	xyloglucan endotransglucosylase/hydrolase 15
arahy.WAJ05F	91.9957	14.0502	4.64203	1.61043	ZH6_S1	0.847273	Tify	protein TIFY 6B-like isoform X3 [Glycine max]
arahy.8C0M2R	2.36084	0.0414727	0.0879024	0.29196	ZH6_S1	0.876332	--	Uncharacterised protein family (UPF0497)
arahy.KSD8Q4	0.128803	0.0130513	0	0.0251805	ZH6_S1	0.804504	--	unknown protein
arahy.YV33P0	373.594	136.3	154.254	90.0388	ZH6_S1	0.587108	--	cytochrome c oxidase-related
arahy.K7MVK9	30.2463	13.9437	7.80807	7.41225	ZH6_S1	0.538994	--	Clathrin adaptor complexes medium subunit family protein
arahy.IC01SW	0.159641	0	0	0	ZH6_S1	1	--	ABC transporter G family member 36-like [Glycine max]
arahy.0D01QN	37.0557	6.17633	3.16522	0.51981	ZH6_S1	0.833323	--	NADPH:quinone oxidoreductase
arahy.AEW45S	2.47741	0.596771	0.158975	0.110694	ZH6_S1	0.759115	--	L-ascorbate oxidase homolog [Glycine max]
arahy.RJ9TTJ	4.5918	1.81288	2.17312	1.05581	ZH6_S1	0.526738	--	senescence-associated carboxylesterase 101-like isoform X1 [Glycine max]
arahy.IWFQ27	30.8018	3.49828	2.627	2.50043	ZH6_S1	0.886426	--	uncharacterized protein DDB_G0271670-like [Glycine max]
arahy.98CSRD	63.8515	2.32645	3.21689	6.11522	ZH6_S1	0.904228	--	plasma-membrane associated cation-binding protein 1
arahy.58XCKB	38.1395	1.15082	0.8597	0.751882	ZH6_S1	0.969826	--	ATP binding protein n=3 Tax=Zea mays RepID=B6SKI4_MAIZE
arahy.MKQQ3C	16.0649	4.89838	2.2072	1.8153	ZH6_S1	0.695088	C2C2-Dof	DOF zinc finger protein 1
arahy.3469MM	22.3811	9.30853	3.83522	3.13556	ZH6_S1	0.58409	--	alkaline/neutral invertase
arahy.2T7FQZ	0.652537	0	0	0	ZH6_S1	1	--	chalcone synthase [Glycine max]
Novel00549	1.06044	0.187757	0.378198	0	ZH6_S1	0.643357	--	--
arahy.5MVT7T	6.11147	0.023722	0	0	ZH6_S1	0.996118	--	annexin 5
arahy.9YX67Z	1.24404	0.21582	0.0508657	0	ZH6_S1	0.826516	--	disease resistance protein (CC-NBS-LRR class) family protein
arahy.2R7T4K	5.17252	2.39337	1.6664	0.712075	ZH6_S1	0.537292	--	GTP-binding protein engA n=1 Tax=Medicago truncatula RepID=G7IED3_MEDTR
arahy.LRN7UR	11.1694	0.625549	0.364191	0.0736695	ZH6_S1	0.943995	C2H2	zinc finger protein 3
arahy.96XQBG	10.1985	0.413397	0.563304	0.353735	ZH6_S1	0.944766	WRKY	probable WRKY transcription factor 48 [Glycine max]
arahy.LRUD7W	2.86427	0	0	0	ZH6_S1	1	--	Late embryogenesis abundant protein (LEA) family protein
arahy.5IN5H0	0.590591	0.019499	0.0417905	0.0622526	ZH6_S1	0.894593	--	ATP binding microtubule motor family protein
arahy.A4KSPL	7.55891	0.537892	0.571933	0.70458	ZH6_S1	0.906788	TRAF	ankyrin repeat protein
arahy.HP6SUR	2.93137	0.357621	0.155696	0	ZH6_S1	0.878002	--	trafficking protein particle complex subunit-like protein
arahy.WX9D55	0.42863	0	0.100789	0	ZH6_S1	0.764857	--	UDP-Glycosyltransferase superfamily protein
arahy.8K5I59	0.440607	0	0	0	ZH6_S1	1	--	protein FANTASTIC FOUR 3 [Glycine max]
arahy.9V8R16	9.45184	0.082586	0.176577	0	ZH6_S1	0.981318	--	ankyrin repeat-containing protein [Glycine max]
Novel00221	64.27	22.6971	9.52846	3.73863	ZH6_S1	0.646848	--	--
arahy.X8ET43	1.21603	0.254621	0.186631	0.226713	ZH6_S1	0.790612	--	LRR and NB-ARC domain disease resistance protein
arahy.6NY03D	0.176722	0	0	0	ZH6_S1	1	--	O-methyltransferase family protein
arahy.ALHF99	0.578872	0.0815191	0	0	ZH6_S1	0.859176	--	S12-like, 30S ribosomal protein S12 subfamily protein
arahy.15AHFL	8.37606	2.50815	3.0473	2.01592	ZH6_S1	0.636189	--	protein IQ-DOMAIN 14-like [Glycine max]
arahy.7S9HSP	8.23876	0.788587	2.08372	1.82559	ZH6_S1	0.747083	--	ATP-dependent Clp protease ATP-binding subunit
arahy.KPK81W	231.464	14.4225	3.57408	0.794901	ZH6_S1	0.93769	--	L-ascorbate oxidase homolog [Glycine max]
arahy.F6CKCC	0.306274	0	0	0	ZH6_S1	1	--	VQ motif protein
Novel05067	0.387935	0.164933	0.102135	0	ZH6_S1	0.574842	--	--
arahy.T5EZBY	0.137308	0	0.0324933	0	ZH6_S1	0.763354	--	Serine protease inhibitor, potato inhibitor I-type family protein
arahy.Q5GMA1	0.208051	0.0933154	0.0704294	0	ZH6_S1	0.551479	--	ATP-dependent RNA helicase, putative
arahy.HWDC2K	16.8813	1.18682	0.0346664	0.0631118	ZH6_S1	0.929696	LOB	LOB domain-containing protein 25
arahy.019HRU	1.887	0.270533	0.170231	0.203186	ZH6_S1	0.856633	G2-like	myb family transcription factor APL-like isoform X1 [Glycine max]
arahy.SHW8SI	21.8056	8.69423	8.24037	4.74828	ZH6_S1	0.601284	--	glucose-induced degradation protein 4 homolog [Glycine max]
arahy.E06EVW	19.7775	6.6433	3.64114	4.15783	ZH6_S1	0.664099	--	RNA-binding (RRM/RBD/RNP motifs) family protein
arahy.GW47QT	0.154321	0.0636642	0.0439698	0.043666	ZH6_S1	0.587456	--	LRR receptor-like kinase family protein
arahy.LL3JQF	9.13894	0.142492	0.488679	1.27803	ZH6_S1	0.860155	G2-like	myb family transcription factor APL-like isoform X2 [Glycine max]
arahy.AV2ZVS	0.226689	0	0	0	ZH6_S1	1	--	F-box/RNI-like superfamily protein
arahy.24ECRJ	44.3241	11.5743	3.27765	1.9855	ZH6_S1	0.738871	--	alkaline/neutral invertase
arahy.S358VU	6.26214	0.979702	0.595309	0.729199	ZH6_S1	0.843552	--	uncharacterized protein DDB_G0271670-like [Glycine max]
arahy.K29MSX	0.147151	0.0441428	0.0330078	0.0200308	ZH6_S1	0.700017	TF	transcription factor PIF4-like [Glycine max]
arahy.JCH4FE	69.5265	26.4958	13.407	13.7292	ZH6_S1	0.61891	--	unknown protein
arahy.G0D4YA	0.585639	0.168384	0.178447	0	ZH6_S1	0.695296	--	Unknown protein
arahy.DWWZ6G	47.1052	9.77329	13.0584	6.99743	ZH6_S1	0.722782	--	phosphoethanolamine N-methyltransferase
arahy.W8IC6S	1.81607	0.016731	0	0.0649673	ZH6_S1	0.964226	--	carbonic anhydrase 1
arahy.LE2REB	19.2554	4.00681	0.531617	0	ZH6_S1	0.791913	--	Pollen Ole e 1 allergen and extensin family protein
arahy.XT6BWY	14.248	7.04326	4.54178	2.95517	ZH6_S1	0.505666	--	receptor-like kinase 1
arahy.AT9VNX	2.53968	0.0937281	0.671499	0.793703	ZH6_S1	0.687479	--	nodulin MtN21 /EamA-like transporter family protein
arahy.CIB6XC	4.79877	0.0474765	0.0505507	0	ZH6_S1	0.989466	--	ATP binding/protein serine/threonine kinase [Glycine max]
arahy.HG7TPY	2.89009	1.33499	0.867319	0.545517	ZH6_S1	0.538082	--	Uncharacterised protein family (UPF0497)
arahy.023UF6	31.1582	13.9138	8.96417	7.0713	ZH6_S1	0.553448	--	ADP-ribosylation factor GTPase-activating protein AGD10
arahy.NIU36G	0.711734	0	0	0	ZH6_S1	1	--	Metal transport family protein n=1 Tax=Populus trichocarpa RepID=B9HI40_POPTR
arahy.35DV36	2.2017	0.762834	0.723271	0.445601	ZH6_S1	0.653525	--	LAG1 longevity assurance homolog 3
arahy.V82W90	2.04034	0	0	0	ZH6_S1	1	--	Protein kinase superfamily protein
arahy.M35B2F	13.9519	1.91447	2.47771	2.55032	ZH6_S1	0.817206	--	probable polygalacturonase-like [Glycine max]
arahy.IM1JRZ	0.609221	0	0	0	ZH6_S1	1	--	putative indole-3-acetic acid-amido synthetase GH3.9
arahy.F7BNA1	32.6276	9.97834	8.67752	1.52641	ZH6_S1	0.694175	--	Octicosapeptide/Phox/Bem1p family protein
arahy.MTEL0D	4.50916	1.41186	1.44303	1.49379	ZH6_S1	0.668721	--	protein IQ-DOMAIN 14-like [Glycine max]
arahy.RXWW1P	0.26405	0	0.0397272	0	ZH6_S1	0.849547	--	uncharacterized protein LOC102661770 isoform X2 [Glycine max]
arahy.Y3DHDC	50.6783	7.78276	3.55735	1.45377	ZH6_S1	0.846428	bHLH	transcription factor bHLH48-like [Glycine max]
arahy.PLG903	0.109956	0	0	0	ZH6_S1	1	--	nodulation-signaling pathway 1 protein-like [Glycine max]
arahy.D1F2PF	9.04057	0	0	0	ZH6_S1	1	--	probable pectinesterase/pectinesterase inhibitor 21-like [Glycine max]
arahy.0Z8YFF	37.5962	4.52581	1.77145	0.379529	ZH6_S1	0.879621	--	Protein kinase superfamily protein
arahy.ZWU3E4	6.32534	0	0	0	ZH6_S1	1	--	SAUR-like auxin-responsive protein family
arahy.38CFQ6	18.7007	7.279	5.30008	4.36363	ZH6_S1	0.610762	--	villin-1-like isoform X2 [Glycine max]
arahy.Z6E1QU	13.9089	1.58397	1.63982	0.481257	ZH6_S1	0.882102	--	calcium-transporting ATPase 2, plasma membrane-type protein
arahy.572HXX	48.751	15.3762	9.47404	8.02017	ZH6_S1	0.684598	--	cAMP-regulated phosphoprotein 19-related protein
arahy.JGYC2J	140.284	5.86832	4.32766	1.9646	ZH6_S1	0.958168	--	Glycerophosphodiester phosphodiesterase GDE1 n=2 Tax=Triticeae RepID=M8BLH1_AEGTA
arahy.6480K7	175.929	14.7818	18.2967	6.23373	ZH6_S1	0.895999	--	cysteine proteinase1
arahy.S5HWFM	0.39074	0	0	0	ZH6_S1	1	--	CSL zinc finger domain-containing protein
arahy.83QM18	1.12615	0.235815	0.0551928	0	ZH6_S1	0.7906	--	apyrase 2
Novel00958	73.7237	15.9358	5.95731	5.0254	ZH6_S1	0.783844	--	--
arahy.V7YFUL	1.69423	0.0579871	0	0	ZH6_S1	0.965774	--	DUF4228 domain protein
arahy.3H39ZY	14.1028	2.13994	0.595373	0.161883	ZH6_S1	0.848261	--	Transmembrane amino acid transporter family protein
Novel04574	7.35991	0	0	0	ZH6_S1	1	--	--
arahy.XBYN1J	23.3013	5.30466	0.798593	0.228722	ZH6_S1	0.772344	MADS	MADS-box transcription factor family protein
arahy.2WN1K3	8.8492	3.5602	1.40315	1.02465	ZH6_S1	0.597682	--	Copper amine oxidase family protein
arahy.X1U4MM	105.871	8.16487	3.61181	3.78117	ZH6_S1	0.922879	ABI3VP1	auxin response factor 6
arahy.7WJ360	20.289	8.15603	4.1584	2.67588	ZH6_S1	0.598008	--	Unknown protein
Novel03107	44.2308	7.9858	4.92959	3.83739	ZH6_S1	0.819452	--	--
arahy.T6LAIA	3.98318	0.343611	1.47773	0.297044	ZH6_S1	0.629008	--	GDSL-like Lipase/Acylhydrolase superfamily protein
arahy.PA59SC	10.1406	4.02562	1.0359	0.603701	ZH6_S1	0.603018	--	Core-2/I-branching beta-1,6-N-acetylglucosaminyltransferase family protein
arahy.1NU69P	5.53812	2.53508	1.37132	0.79866	ZH6_S1	0.54225	--	F-box protein
arahy.7K2YJD	5.45587	0.355082	0.129309	0.0880054	ZH6_S1	0.934917	--	alternative oxidase 2
arahy.RWXI6R	0.403052	0	0	0	ZH6_S1	1	--	LRR and NB-ARC domain disease resistance protein
arahy.U2GM3Q	0.961093	0.141959	0.0580296	0.045279	ZH6_S1	0.852294	--	uncharacterized protein LOC100782361 isoform X5 [Glycine max]
arahy.HT839T	0.105775	0	0	0	ZH6_S1	1	--	tripeptidyl peptidase ii
arahy.TDDH8C	0.206744	0	0	0	ZH6_S1	1	--	Metallocarboxypeptidase inhibitor n=1 Tax=Medicago truncatula RepID=G7K1Z2_MEDTR
arahy.A04R95	0.149392	0	0	0.0360967	ZH6_S1	0.758375	--	protein ROOT HAIR DEFECTIVE 3 homolog 1-like [Glycine max]
arahy.7RX9RF	16.8336	1.2379	1.02148	2.04649	ZH6_S1	0.878429	--	protein FAF-like, chloroplastic-like [Glycine max]
arahy.Y2L847	44.4558	1.27358	0.521824	0.420422	ZH6_S1	0.971352	MYB	myb transcription factor
arahy.8771PM	13.6342	6.57842	5.21683	4.04696	ZH6_S1	0.517507	--	golgin candidate 1
arahy.Y6M3VX	14.752	5.03106	2.84568	2.38071	ZH6_S1	0.658957	--	cytochrome B561-1
arahy.QVKQ5Y	0.661027	0	0	0	ZH6_S1	1	--	chalcone synthase [Glycine max]
arahy.MWN8UA	2.63546	1.18136	0.454317	0.145004	ZH6_S1	0.551746	--	Vacuolar iron transporter (VIT) family protein
arahy.LGR8BT	1.3916	0	0.0647932	0.0589794	ZH6_S1	0.95344	--	type I inositol-1,4,5-trisphosphate 5-phosphatase
arahy.8I98WG	1.25063	0.0520121	0	0.0613132	ZH6_S1	0.950974	--	Calmodulin binding protein-like
arahy.V96LGR	1.54536	0.401189	0.25971	0.078806	ZH6_S1	0.740391	--	calcium-transporting ATPase, putative
arahy.R6QF0L	0.347031	0	0	0	ZH6_S1	1	--	Unknown protein
arahy.B85EDH	41.4419	1.00276	4.24519	2.80145	ZH6_S1	0.897563	--	GDSL-like Lipase/Acylhydrolase superfamily protein
arahy.09JDW0	0.348672	0	0	0	ZH6_S1	1	--	Ankyrin repeat family protein
arahy.1YSK8M	8.94262	0.107354	0.0134524	0.0958127	ZH6_S1	0.987995	--	beta-galactosidase 8
arahy.R57IYC	2.36371	0	0	0	ZH6_S1	1	--	hypothetical protein
arahy.D79IFD	2.67075	0.0450521	0	0.310355	ZH6_S1	0.883795	--	annexin 4
arahy.FNV3YB	6.24486	1.15648	1.44144	0.331121	ZH6_S1	0.76918	--	CYCLIN D1
arahy.161SS5	5.03283	1.87753	1.52065	0.683718	ZH6_S1	0.626942	--	uncharacterized protein LOC100778990 isoform X5 [Glycine max]
arahy.LL1TW1	0.75212	0.0441807	0.0575939	0	ZH6_S1	0.923425	--	uncharacterized protein LOC102668673 isoform X2 [Glycine max]
arahy.D0M6LR	5.70059	0	0	0	ZH6_S1	1	--	short-chain dehydrogenase-reductase B
Novel03806	0.430173	0.181227	0	0	ZH6_S1	0.578711	--	--
arahy.Y5CTR1	0.247773	0.105528	0.111835	0	ZH6_S1	0.548641	--	Unknown protein
arahy.1P1KVG	0.964717	0.0094924	0.0494972	0.217368	ZH6_S1	0.774682	--	ankyrin repeat-containing protein [Glycine max]
arahy.CQAX74	7.08202	0.915746	0.809268	0.475483	ZH6_S1	0.870694	--	Actin cross-linking protein
Novel02535	6.18327	2.1142	1.04032	0.594387	ZH6_S1	0.658078	--	--
arahy.J1HUHD	0.386988	0.0934983	0	0	ZH6_S1	0.758395	--	17.6 kDa class II heat shock protein
arahy.12LLDS	0.239045	0.110477	0.100452	0	ZH6_S1	0.537839	--	receptor-like protein kinase 4
arahy.15YPMB	17.7111	7.53626	2.12064	2.9954	ZH6_S1	0.574489	--	senescence-associated protein
arahy.3VLA0M	6.92609	2.52199	1.67314	1.97843	ZH6_S1	0.635871	--	U-box domain-containing protein 6-like [Glycine max]
arahy.H4DHBR	48.1284	22.6873	23.6579	17.8886	ZH6_S1	0.508442	--	serine/threonine protein phosphatase 2A
arahy.BD3621	30.3579	3.82816	2.73471	1.59652	ZH6_S1	0.873899	--	ATP binding microtubule motor family protein
arahy.31X1J3	21.1034	8.89985	4.1011	1.28868	ZH6_S1	0.578274	--	unknown protein
Novel00642	18.3364	0.69522	0.189292	0	ZH6_S1	0.962085	--	--
Novel05065	0.157396	0	0.0473615	0	ZH6_S1	0.699094	--	--
arahy.FEY4ZS	37.4513	7.62264	9.6271	9.06536	ZH6_S1	0.742944	--	GHMP kinase family protein
arahy.12MHRI	50.4302	17.9005	16.9339	15.8476	ZH6_S1	0.645043	--	amidophosphoribosyltransferase 1, chloroplastic-like [Glycine max]
arahy.S6WBKZ	0.231306	0	0	0	ZH6_S1	1	--	uncharacterized protein LOC100795873 isoform X1 [Glycine max]
Novel02329	2.11549	0.0488313	0.0636564	0	ZH6_S1	0.969909	--	--
arahy.L9MGWL	22.7667	0.563872	4.18141	1.83849	ZH6_S1	0.816337	bHLH	transcription factor bHLH63-like [Glycine max]
arahy.VDI3WX	12.7931	0	0.137783	0.112882	ZH6_S1	0.98923	--	IAA-amino acid hydrolase ILR1-like 4-like [Glycine max]
arahy.RHZ4EV	11.6039	1.15522	1.20944	0	ZH6_S1	0.895773	--	Unknown protein
arahy.F73TU2	18.3242	8.51985	8.51015	9.10908	ZH6_S1	0.502893	--	allene oxide synthase
arahy.3RQT8X	2.17208	0.782949	0.593158	0.326489	ZH6_S1	0.639539	--	ATP-binding/protein serine/threonine kinase [Glycine max]
arahy.79RH6E	7.59247	3.21887	2.93273	1.55485	ZH6_S1	0.576044	--	RHOMBOID-like 1
arahy.IXTP9E	9.40365	0.0492634	0.149838	0.10665	ZH6_S1	0.984066	TRAF	BTB/POZ domain-containing protein
arahy.U00TZP	66.5089	23.9406	14.0451	8.64876	ZH6_S1	0.640039	--	Dihydrolipoyllysine-residue succinyltransferase component of 2-oxoglutarate dehydrogenase complex n=3 Tax=Papilionoideae RepID=G7K3L9_MEDTR
arahy.V47NKJ	0.26463	0	0	0	ZH6_S1	1	--	transmembrane protein, putative
arahy.NB83W5	30.3779	7.02582	7.54593	3.86771	ZH6_S1	0.751598	MYB	MYB transcription factor MYB114 isoform X2 [Glycine max]
arahy.Q4AMIE	246.973	20.6241	10.2598	3.53143	ZH6_S1	0.916492	--	Unknown protein
arahy.1G2EUX	5.81375	2.47323	0.956913	0.297387	ZH6_S1	0.57459	--	Cytochrome P450 superfamily protein
arahy.K2UT7U	1.3264	0.25716	0.140173	0.0294459	ZH6_S1	0.806121	--	uncharacterized protein LOC100780115 isoform X1 [Glycine max]
arahy.W8TIS9	106.686	3.52386	11.2941	6.24206	ZH6_S1	0.894138	--	Glutaredoxin family protein
arahy.U63X74	0.391956	0.0653144	0.117763	0.128636	ZH6_S1	0.67181	--	zinc finger protein CONSTANS-LIKE 5-like [Glycine max]
arahy.KH6BJZ	30.5912	0.0908562	0.038623	0	ZH6_S1	0.99703	--	Core-2/I-branching beta-1,6-N-acetylglucosaminyltransferase family protein
arahy.AANK3P	1.88943	0.175652	0.0295527	0	ZH6_S1	0.907034	--	receptor-like kinase 1
arahy.9QC5ZN	0.283133	0	0	0	ZH6_S1	1	--	receptor-like serine/threonine kinase 2
arahy.5GK804	2.08616	0.242624	0.0489591	0.325226	ZH6_S1	0.844103	--	Hemerythrin class glutathione S-transferase n=1 Tax=Physcomitrella patens subsp. patens RepID=K9Y435_PHYPA
Novel05068	3.1648	1.02346	0.904895	1.05306	ZH6_S1	0.667258	--	--
arahy.S7XZ9Q	92.2657	3.06032	14.3186	12.3415	ZH6_S1	0.844811	--	GDSL-like Lipase/Acylhydrolase superfamily protein
arahy.GP8BJK	0.493003	0.172609	0.012531	0.0912529	ZH6_S1	0.649882	--	protein YLS7-like [Glycine max]
arahy.2EI1KH	2.82252	0.250128	0.139554	0.485824	ZH6_S1	0.827876	--	zinc finger A20 and AN1 domain stress-associated protein
arahy.I0I8XZ	15.54	1.6341	0.530988	0	ZH6_S1	0.894846	--	Thioredoxin superfamily protein
arahy.6E3YUI	23.6033	0.841784	0.1842	0	ZH6_S1	0.964336	--	probable pectinesterase/pectinesterase inhibitor 41-like [Glycine max]
Novel02109	1.115	0.0452545	0.066963	0.0939118	ZH6_S1	0.915774	--	--
arahy.2UKM1V	2.09249	0.401626	0.138045	0	ZH6_S1	0.808063	--	unknown protein
arahy.LT4L2L	15.883	1.21613	0.99265	0.924751	ZH6_S1	0.923432	--	protein CHUP1, chloroplastic-like isoform X2 [Glycine max]
arahy.KHE2M7	0.52741	0.193419	0.0646009	0.0588044	ZH6_S1	0.633267	--	NADH-ubiquinone oxidoreductase chain n=309 Tax=Magnoliophyta RepID=G7IB69_MEDTR
arahy.H52F03	71.4056	32.7762	20.4011	14.2689	ZH6_S1	0.540986	--	Unknown protein
arahy.7VFA6D	2.18292	0.412498	0.167138	0.155746	ZH6_S1	0.811034	--	wall-associated receptor kinase-like 15-like [Glycine max]
arahy.FXV2QT	0.741904	0	0	0	ZH6_S1	1	--	Orf100 n=2 Tax=commelinids RepID=G9HNV1_PHODC
arahy.FM4779	4.74575	0.150131	0	0	ZH6_S1	0.968365	--	spermidine hydroxycinnamoyl transferase-like [Glycine max]
arahy.DM14FR	1.42282	0.0863688	0.0214263	0	ZH6_S1	0.939297	--	protein LONGIFOLIA 2-like isoform X2 [Glycine max]
arahy.QVQB09	12.7826	3.58512	2.92664	4.54239	ZH6_S1	0.644642	--	Unknown protein
arahy.0X8JA4	0.787043	0.330391	0.0198395	0	ZH6_S1	0.580212	--	uncharacterized protein LOC100815819 isoform X1 [Glycine max]
arahy.7CMH8M	10.9509	0.901309	0.456669	0.322996	ZH6_S1	0.917695	--	F-box family protein
arahy.SYI62H	4.58019	1.06397	0.938947	0.718207	ZH6_S1	0.767701	S1Fa-like	receptor-like kinase
arahy.20BG1F	3.72647	0	0	0	ZH6_S1	1	--	probable calcium-binding protein CML25-like [Glycine max]
arahy.HV2TRI	0.868158	0.377201	0.279821	0.185883	ZH6_S1	0.565516	--	uncharacterized protein LOC102668494 [Glycine max]
arahy.I5TYVY	0.82225	0.132542	0	0	ZH6_S1	0.838806	--	Unknown protein
arahy.00PRVK	0.114876	0.0346479	0	0	ZH6_S1	0.698389	--	Unknown protein
arahy.6BH6U4	10.847	3.61639	0.863316	0.450049	ZH6_S1	0.666601	--	uncharacterized protein LOC100800379 isoform X1 [Glycine max]
arahy.KE7AMS	14.4694	6.29133	4.82323	3.75695	ZH6_S1	0.565198	--	Protein kinase superfamily protein
arahy.E93Z3L	0.760396	0	0	0	ZH6_S1	1	--	ammonium transporter 1
arahy.NU1YL6	0.473851	0	0	0	ZH6_S1	1	--	uncharacterized protein LOC102666896 [Glycine max]
arahy.19SFKA	15.3044	1.83174	0.198296	0.199763	ZH6_S1	0.880313	--	adenylyl cyclase-associated protein
arahy.I8XYVU	1.83342	0.351843	0.109224	0.0784939	ZH6_S1	0.808095	TF	GATA type zinc finger transcription factor family protein
arahy.1NRA6C	0.568876	0.125924	0.0320126	0	ZH6_S1	0.778644	--	receptor-like serine/threonine kinase 2
arahy.KK3R3A	16.9591	1.40278	1.68696	1.76099	ZH6_S1	0.896163	--	Protein kinase superfamily protein
arahy.39UCUQ	0.325181	0	0.0113506	0	ZH6_S1	0.965094	--	calcium-transporting ATPase 2, plasma membrane-type protein
arahy.069QKB	1.70474	0.0210951	0.128325	0.0500642	ZH6_S1	0.924725	--	Lipin family protein
arahy.AL59ZJ	0.887468	0.308084	0.0699357	0	ZH6_S1	0.652851	--	cysteine protease ATG4B
arahy.IM67PL	36.7615	5.22341	3.02107	2.03432	ZH6_S1	0.857911	--	uncharacterized protein At3g49720-like isoform X2 [Glycine max]
arahy.63YKCR	2.65109	0.191089	0.0339104	0.225261	ZH6_S1	0.915031	--	glutathione S-transferase, amine-terminal domain protein
arahy.MZFR22	0.488862	0.0104172	0.0110398	0	ZH6_S1	0.977417	--	LRR and NB-ARC domain disease resistance protein
arahy.S9M61F	3.90293	0.0472628	0.349942	0.0502972	ZH6_S1	0.910339	--	Disease resistance protein (TIR-NBS-LRR class) family
arahy.VR06A8	0.962348	0.401525	0.091188	0	ZH6_S1	0.582765	--	cyclic nucleotide-gated ion channel-like protein
arahy.R7ZBMQ	312.881	19.8242	12.8771	9.05276	ZH6_S1	0.93664	--	cytochrome P450 84A1-like [Glycine max]
Novel05097	0.735397	0.209143	0.27461	0	ZH6_S1	0.626583	--	--
arahy.0CU6GK	56.924	0.600419	2.01844	1.36698	ZH6_S1	0.964541	Trihelix	trihelix transcription factor GT-2-like [Glycine max]
arahy.C6NCIG	0.144348	0.047489	0	0	ZH6_S1	0.671011	--	Peptide chain release factor 1
arahy.3F0YT4	19.4237	0	0	0	ZH6_S1	1	--	Pectate lyase family protein
arahy.HS7LHQ	0.369603	0	0	0	ZH6_S1	1	--	Unknown protein
arahy.R93B4J	7.57774	3.6529	2.4225	0.803894	ZH6_S1	0.517943	--	soluble N-ethylmaleimide-sensitive factor adaptor protein 33
arahy.SMM8KX	7.65656	3.66756	1.79452	1.61406	ZH6_S1	0.520991	--	uncharacterized protein LOC100799892 isoform X3 [Glycine max]
arahy.M9LJWH	3.0171	0.722066	0.130156	0	ZH6_S1	0.760676	--	probable membrane-associated kinase regulator 6-like [Glycine max]
arahy.29C69C	68.4781	5.23132	3.71274	1.76252	ZH6_S1	0.923606	--	Unknown protein
Novel03232	379.825	37.2364	5.97186	0.324453	ZH6_S1	0.901964	--	--
arahy.VEA7DZ	0.288677	0.0155111	0	0	ZH6_S1	0.946268	--	NAD-dependent malic enzyme 1
arahy.L2FRMW	30.8747	0.0314591	0	0	ZH6_S1	0.998981	--	alpha/beta-Hydrolases superfamily protein
Novel04636	3.91472	0.404931	0.0563952	0.147257	ZH6_S1	0.896562	--	--
arahy.0GKG8Y	0.302954	0	0	0	ZH6_S1	1	--	UDP-Glycosyltransferase superfamily protein
arahy.MG1LG0	2.20877	0.766068	0.997823	0.96703	ZH6_S1	0.548245	--	Peptide chain release factor 2
arahy.QW19KK	33.7735	16.2747	9.53178	8.42215	ZH6_S1	0.518123	C3H	zinc finger CCCH domain-containing protein 17-like [Glycine max]
arahy.X0GQC6	12.8929	5.90131	2.15784	1.89748	ZH6_S1	0.542282	--	Nucleotide/sugar transporter family protein
arahy.J3VGT8	0.354507	0.167754	0.0418127	0	ZH6_S1	0.526797	--	riboflavin biosynthesis protein RibD
arahy.110YWB	0.471488	0	0	0	ZH6_S1	1	--	germin-like protein 9
arahy.Q6VMSA	20.3585	2.27021	4.18114	3.82157	ZH6_S1	0.794624	--	probable carboxylesterase 18-like [Glycine max]
arahy.YPW5N8	1.17201	0.555106	0.468305	0.218923	ZH6_S1	0.526364	--	calcium-binding EF hand protein
arahy.1B2YDL	4.21782	1.5079	0.455712	0.754907	ZH6_S1	0.642492	--	senescence-associated protein, putative
arahy.B34789	0.520442	0.254597	0	0.113025	ZH6_S1	0.510806	--	histone acetyltransferase of the MYST family 1
Novel03826	15.5342	2.59001	2.80009	2.78379	ZH6_S1	0.819746	C2C2-Dof	--
arahy.MN8TLX	10.212	2.89785	2.74809	2.30526	ZH6_S1	0.71623	--	Transmembrane amino acid transporter family protein
arahy.UYU815	2.42033	0.221371	0.16983	0.322504	ZH6_S1	0.866752	--	Pentatricopeptide repeat (PPR) superfamily protein
Novel01150	190.842	16.7098	9.31921	5.94236	ZH6_S1	0.912442	--	--
arahy.TQHF91	21.2191	0.303662	0.107775	0	ZH6_S1	0.985689	--	Unknown protein
arahy.1S388T	0.177063	0	0	0	ZH6_S1	1	--	UPF0392 protein RCOM_0530710-like [Glycine max]
arahy.P4443F	2.39531	0.0313153	0	0	ZH6_S1	0.986926	--	L-ascorbate oxidase homolog [Glycine max]
arahy.ES1PUL	1.43452	0.370564	0.0641374	0.0319168	ZH6_S1	0.741681	--	phospholipase D alpha 1
arahy.5A64T9	111.444	39.5734	19.0563	15.9861	ZH6_S1	0.644902	--	tubulin beta chain 2
arahy.YZ7MCJ	13.205	6.38085	2.56222	1.66103	ZH6_S1	0.516785	--	uncharacterized protein LOC100782622 isoform X2 [Glycine max]
arahy.15VHUH	1.25189	0.401872	0.16772	0.193666	ZH6_S1	0.678988	--	disease resistance protein
arahy.4A4JN6	42.8535	5.93374	2.03977	1.06788	ZH6_S1	0.861534	MYB	myb transcription factor
arahy.XM9WCR	0.165389	0.0475528	0.0503947	0	ZH6_S1	0.695296	--	alpha/beta-hydrolase superfamily protein
arahy.1E2EJ9	0.252967	0	0	0	ZH6_S1	1	--	Unknown protein
arahy.VYLL54	20.8261	1.8407	1.66508	1.50691	ZH6_S1	0.911616	--	Galactosyltransferase family protein
arahy.BLK73U	0.231901	0	0	0	ZH6_S1	1	--	chalcone synthase [Glycine max]
arahy.VHP4C7	13.611	4.26263	4.38001	2.95296	ZH6_S1	0.6782	--	unknown protein
arahy.X66EBB	0.166781	0	0.0828008	0	ZH6_S1	0.503537	--	Disease resistance protein (TIR-NBS-LRR class) family
arahy.BS7E4V	6.97512	2.91182	2.02352	1.03976	ZH6_S1	0.582541	--	probable polygalacturonase-like [Glycine max]
arahy.E5J967	14.9017	3.54238	3.77177	2.95468	ZH6_S1	0.746889	--	Alternative oxidase family protein
arahy.HYA0MS	0.473133	0	0	0	ZH6_S1	1	--	O-methyltransferase family protein
arahy.YQRH3K	23.4276	4.05945	2.40936	1.97928	ZH6_S1	0.826724	--	Protein kinase superfamily protein
Novel02342	84.555	37.5996	16.4704	10.3916	ZH6_S1	0.555324	--	--
arahy.IGZ3F9	1.7972	0.414588	0.11313	0.062329	ZH6_S1	0.769315	--	downstream neighbor of Son-like protein, putative
arahy.246EX0	1.95058	0.279305	0	0.0813287	ZH6_S1	0.85681	--	arabinogalactan peptide 20-like [Glycine max]
arahy.1ZHN64	146.065	50.2981	26.5755	25.1758	ZH6_S1	0.655645	--	Major facilitator superfamily protein
arahy.DRPT5I	0.969121	0.28327	0.244463	0	ZH6_S1	0.707704	TF	transcription factor bHLH25-like [Glycine max]
arahy.W46PLF	18.7147	8.52755	4.96975	3.83366	ZH6_S1	0.544338	--	Calcineurin-like metallo-phosphoesterase superfamily protein
arahy.SL8FFE	0.494915	0.214492	0.0824938	0.0782844	ZH6_S1	0.566608	--	disease resistance protein (TIR-NBS-LRR class), putative
arahy.B4CBXE	0.708359	0.020206	0.278361	0.220215	ZH6_S1	0.607033	--	MATE efflux family protein
arahy.73AA2K	1.15747	0.151265	0.0255322	0.0309884	ZH6_S1	0.869315	--	LRR and NB-ARC domain disease resistance protein
arahy.UM2SQV	54.2641	12.7371	3.7736	1.46793	ZH6_S1	0.765276	--	cysteine proteinase1
arahy.D2ALS7	38.9269	7.56851	8.29445	6.26713	ZH6_S1	0.786923	--	ATP-binding/protein serine/threonine kinase [Glycine max]
arahy.CWZU13	496.091	13.956	17.9165	5.14768	ZH6_S1	0.963885	--	Pectate lyase family protein
arahy.TZXT9X	13.6979	5.65827	6.35236	4.36748	ZH6_S1	0.536251	--	BTB/POZ domain-containing protein [Glycine max]
arahy.6VZ6G8	37.0584	8.28612	5.84802	3.51612	ZH6_S1	0.776404	--	ATP-binding/protein serine/threonine kinase [Glycine max]
arahy.X9KLSS	3.59806	0.620044	0.102881	0.107451	ZH6_S1	0.827672	--	dentin sialophosphoprotein-like [Glycine max]
arahy.C8QSDY	0.396127	0	0	0	ZH6_S1	1	--	Peroxidase superfamily protein
arahy.MR8QAM	0.754021	0.11231	0.128556	0.1209	ZH6_S1	0.829506	--	UDP-D-glucuronate 4-epimerase 2
arahy.U5GM9Y	0.107724	0.0139868	0	0	ZH6_S1	0.87016	--	DUF247 domain protein
arahy.C5DY5V	19.4477	8.5381	7.78683	6.1432	ZH6_S1	0.560971	--	Protein kinase superfamily protein
arahy.K09X2E	0.226192	0	0	0	ZH6_S1	1	--	hypothetical protein
arahy.KLZ79N	87.419	16.5092	5.69822	5.45053	ZH6_S1	0.811149	--	subtilisin-like serine protease 2
arahy.TS21P9	2.91487	0	0.0392733	0	ZH6_S1	0.986527	--	gibberellin 20 oxidase 2-like [Glycine max]
arahy.WDLA50	9.30512	0.969401	1.21954	1.98886	ZH6_S1	0.786262	--	glycosyl hydrolase family protein 43
arahy.IQR3N2	4.26457	0.84506	1.47891	1.5511	ZH6_S1	0.636282	MADS	MADS-box transcription factor 6 [Glycine max]
arahy.LPL3F8	24.1812	10.4613	5.37206	4.64396	ZH6_S1	0.567379	--	protein ROOT HAIR DEFECTIVE 3 homolog 1-like [Glycine max]
arahy.YY3FCR	3.33174	1.37642	0.732071	0.306432	ZH6_S1	0.586878	--	Protein kinase superfamily protein
arahy.H2M7TV	7.17672	0	0	0.0703392	ZH6_S1	0.990199	--	transmembrane protein, putative
Novel00427	6.12415	1.43025	0.885737	0.822298	ZH6_S1	0.766457	--	--
arahy.606BFT	500.204	15.1081	8.72329	1.43618	ZH6_S1	0.969796	--	Pectate lyase family protein
arahy.9S9EKZ	7.37133	0.654684	1.29706	1.41235	ZH6_S1	0.8084	--	plectin-like isoform X3 [Glycine max]
arahy.84DVUA	6.05069	1.00107	0.582781	0.338518	ZH6_S1	0.834553	--	polyamine oxidase 1
arahy.G897EA	6.16426	2.15248	0.969879	0.710918	ZH6_S1	0.650812	--	putative UDP-glucuronate:xylan alpha-glucuronosyltransferase 3-like [Glycine max]
arahy.3P0VVA	40.6883	14.6292	17.3583	11.9091	ZH6_S1	0.573384	--	Protein kinase superfamily protein
arahy.H3TIY6	35.717	11.1533	6.22478	3.24567	ZH6_S1	0.68773	--	probable BOI-related E3 ubiquitin-protein ligase 3-like isoform X2 [Glycine max]
arahy.8Q755P	3.13964	0.666381	0.111312	0.0613273	ZH6_S1	0.787752	--	Protein kinase superfamily protein
arahy.Q5FMS0	78.6613	28.2144	32.2961	16.1182	ZH6_S1	0.589428	--	Cytochrome c oxidase, subunit Vib family protein
arahy.39ZYJP	43.4149	11.0838	3.32647	5.32341	ZH6_S1	0.7447	--	dehydration-responsive protein RD22
arahy.0G9B1N	0.746197	0	0.0697772	0	ZH6_S1	0.906489	--	SAUR-like auxin-responsive protein family
arahy.I3KG3W	0.224039	0.0315762	0	0	ZH6_S1	0.859059	--	uncharacterized protein LOC100807449 isoform X2 [Glycine max]
arahy.ITV0VK	33.6351	0.223867	0.211859	0	ZH6_S1	0.993344	MADS	MADS-box transcription factor family protein
arahy.KQJ89G	78.4906	22.2824	8.7676	3.63762	ZH6_S1	0.716114	--	Domain of unknown function (DUF23)
arahy.X65NL3	1.36878	0.0709644	0.0185018	0	ZH6_S1	0.948155	--	sieve element occlusion protein
arahy.ES8831	3.76325	1.10676	0.239874	0	ZH6_S1	0.705903	--	Orf124 protein n=3 Tax=Beta RepID=Q9MF37_BETVU
arahy.7UQ7HQ	30.5307	9.31043	5.54792	3.68213	ZH6_S1	0.695047	--	Transmembrane proteins 14C
arahy.NYD0D7	1.91524	0.623176	0.323536	0.126224	ZH6_S1	0.674622	--	Protein kinase superfamily protein
arahy.ML3LVJ	70.065	0.533646	0.0352654	0.128404	ZH6_S1	0.992384	--	G-protein gamma subunit 2
arahy.DHJ6J2	86.6426	0.817057	0.118461	0	ZH6_S1	0.99057	--	BAG family molecular chaperone regulator 3-like [Glycine max]
arahy.8PZ45R	17.8071	0.598197	3.55599	0.32846	ZH6_S1	0.800305	--	Protein kinase family protein
arahy.FA4IPG	2.9367	1.25174	0.580507	0.126314	ZH6_S1	0.57376	--	downstream target of AGL15-4 protein, putative
arahy.IY6P5S	0.907063	0.444681	0.210696	0.443379	ZH6_S1	0.509758	--	Protein kinase superfamily protein
arahy.HS5IHJ	65.7095	1.38316	0.385503	0.270875	ZH6_S1	0.97895	--	beta-galactosidase 11
Novel00544	5.1885	1.45214	1.87124	1.88787	ZH6_S1	0.636143	--	--
arahy.1VJ4CP	0.273871	0.0092165	0	0	ZH6_S1	0.966347	--	chitinase A
arahy.0KDC5W	427.044	99.7305	77.8014	60.5579	ZH6_S1	0.766463	--	glutamine synthetase 1.3
Novel03776	0.45503	0	0	0	ZH6_S1	1	--	--
arahy.5F2NJK	0.579976	0.214926	0.0587959	0.0418868	ZH6_S1	0.629422	--	ATP binding microtubule motor family protein
arahy.M14RRE	0.369386	0.0284327	0	0	ZH6_S1	0.923027	--	putative clathrin assembly protein At5g57200-like [Glycine max]
arahy.TV80DA	7.71833	3.16653	1.05312	0.906664	ZH6_S1	0.589738	bHLH	basic helix-loop-helix (bHLH) DNA-binding superfamily protein
arahy.R12JL5	0.29081	0	0	0	ZH6_S1	1	--	uncharacterized protein LOC100787678 [Glycine max]
arahy.2P25JP	1.6742	0.224303	0.181413	0	ZH6_S1	0.866024	--	unknown protein
arahy.PP5TI0	0.825864	0.097571	0.0346296	0	ZH6_S1	0.881856	--	OTU-like cysteine protease family protein
arahy.NV1RRS	16.4645	2.56099	2.73198	1.26159	ZH6_S1	0.834068	--	glucan endo-1,3-beta-glucosidase 14-like [Glycine max]
arahy.ZES89D	10.5138	2.33919	1.61565	1.42421	ZH6_S1	0.777512	--	PPPDE putative thiol peptidase family protein
arahy.29RHWF	0.131695	0.0264804	0	0	ZH6_S1	0.798926	--	B3 DNA-binding domain protein
arahy.Q7N6WS	4.73296	0.2975	0.222137	0.152303	ZH6_S1	0.937143	--	uncharacterized protein LOC100804417 isoform X6 [Glycine max]
arahy.ARQH3Y	0.183378	0.0403389	0	0	ZH6_S1	0.780023	--	kunitz trypsin inhibitor 1
arahy.IH6GFC	0.493761	0	0.235973	0	ZH6_S1	0.52209	--	Unknown protein
arahy.6BLQ3E	0.694649	0	0	0	ZH6_S1	1	--	Unknown protein
arahy.E988LT	18.7829	8.17022	5.77235	6.88442	ZH6_S1	0.565018	--	GDSL-like Lipase/Acylhydrolase superfamily protein
arahy.YJUR3Z	0.559433	0.125823	0.0370877	0.132076	ZH6_S1	0.763912	--	Disease resistance protein (TIR-NBS-LRR class) family
arahy.4XA800	1.18825	0.0235436	0.122766	0.167626	ZH6_S1	0.85893	--	probable disease resistance protein At5g66900-like isoform X1 [Glycine max]
arahy.HIE0E0	12.94	3.16042	0.941454	0.734176	ZH6_S1	0.755763	--	inactive poly [ADP-ribose] polymerase RCD1
arahy.JH6WNL	22.2192	6.66591	0.689342	0	ZH6_S1	0.699994	--	magnesium transporter NIPA2-like isoform X1 [Glycine max]
arahy.PL2FJ9	10.9259	3.11771	1.62962	1.59675	ZH6_S1	0.714649	--	protein BREAST CANCER SUSCEPTIBILITY 1 homolog isoform X1 [Glycine max]
arahy.0EDZ2A	8.78081	0	0	0	ZH6_S1	1	--	unknown protein
arahy.0J3BLQ	4.04586	0	0	0	ZH6_S1	1	--	nodulin MtN21 /EamA-like transporter family protein
arahy.DXLT9X	13.4709	1.87176	1.26512	1.33889	ZH6_S1	0.861051	--	Protein kinase superfamily protein
arahy.S9URI0	0.728799	0.0419562	0	0	ZH6_S1	0.942431	--	receptor serine/threonine kinase, putative
arahy.IG3UT7	9.20765	0	0.0651811	0	ZH6_S1	0.992921	Tify	jasmonate-zim-domain protein 8
arahy.7WLH9S	0.712078	0.254612	0.246393	0.0791628	ZH6_S1	0.642438	--	uncharacterized protein LOC102669267 [Glycine max]
arahy.T9D4U4	181.647	2.74459	0.925268	0.320753	ZH6_S1	0.984891	--	cAMP-regulated phosphoprotein 19-related protein
arahy.72VZ3I	0.742787	0.0227318	0.0888995	0.323691	ZH6_S1	0.564221	--	protein FANTASTIC FOUR 3-like [Glycine max]
Novel01834	2.99744	0.197713	0.0428272	0.2592	ZH6_S1	0.913526	G2-like	--
arahy.XBVN4R	0.319432	0.054944	0.0908038	0.0319975	ZH6_S1	0.715733	--	galactoside 2-alpha-L-fucosyltransferase-like protein
arahy.Q6X8T9	218.123	4.4532	0.625544	0	ZH6_S1	0.979584	--	probable galacturonosyltransferase-like 1-like [Glycine max]
arahy.KBA53Y	1.85163	0.0623142	0.133553	0	ZH6_S1	0.927873	--	biotin carboxyl carrier acetyl-CoA carboxylase
arahy.2HKE0Z	13.8291	6.07463	2.05139	1.06299	ZH6_S1	0.560736	--	probable xyloglucan glycosyltransferase 6-like [Glycine max]
arahy.98MC06	0.174971	0.0495639	0.0535704	0.0323529	ZH6_S1	0.693833	--	Disease resistance protein (CC-NBS-LRR class) family
arahy.Q1FV6H	103.393	21.7825	13.8941	10.3015	ZH6_S1	0.789323	AUX/IAA	indole-3-acetic acid inducible 14
arahy.TCB5J2	0.498401	0	0	0	ZH6_S1	1	--	Unknown protein
arahy.ZV83LZ	20.3756	5.23171	2.40726	0.103397	ZH6_S1	0.743236	--	RNA binding (RRM/RBD/RNP motifs) family protein
arahy.Z9YLBS	63.9899	11.9286	4.73465	3.35172	ZH6_S1	0.813586	--	pyruvate dehydrogenase E1 beta
arahy.EQ2CTR	146.305	31.4955	39.483	38.9452	ZH6_S1	0.730133	--	xyloglucan glycosyltransferase 4-like [Glycine max]
arahy.WM32N3	0.202834	0	0	0	ZH6_S1	1	--	Maturase n=4 Tax=Mesangiospermae RepID=G7I9T4_MEDTR
Novel03268	0.610915	0.127823	0.144427	0	ZH6_S1	0.763589	--	--
arahy.H2NMKM	112.755	9.09818	5.21167	4.44737	ZH6_S1	0.91931	ABI3VP1	auxin response factor 6
arahy.ASAK87	1.79616	0	0	0.0406838	ZH6_S1	0.97735	--	cellulose synthase-like B4
arahy.QXP99D	2.35633	0	0	0	ZH6_S1	1	--	Auxin efflux carrier family protein
arahy.I4KDIP	6.25332	0	0	0	ZH6_S1	1	--	Pectate lyase family protein
Novel03472	2.69516	0.49074	0.864961	0.0530815	ZH6_S1	0.679069	--	--
arahy.T6CC7G	1.92889	0.0701693	0	0	ZH6_S1	0.963622	--	sterol C4-methyl oxidase 1-2
arahy.S3AGI0	1.2096	0	0.228362	0	ZH6_S1	0.811209	TF	WRKY family transcription factor family protein
arahy.JU75F3	1600.94	433.128	643.129	426.385	ZH6_S1	0.598281	--	Unknown protein
arahy.IW34RN	0.346947	0.0890266	0	0	ZH6_S1	0.7434	--	calmodulin-binding receptor-like cytoplasmic kinase 3
arahy.0R2KAM	1.21749	0.32284	0	0	ZH6_S1	0.734831	--	hypothetical protein
arahy.L37WZG	0.225389	0.0780387	0.101731	0	ZH6_S1	0.548641	--	envelope membrane protein
arahy.IG2SMP	2.60954	0	0	0	ZH6_S1	1	--	major intrinsic protein (MIP) family transporter
arahy.41CPL5	60.3412	5.11375	3.42944	1.44743	ZH6_S1	0.915253	--	lysosomal beta glucosidase-like isoform X1 [Glycine max]
arahy.D7NBKG	14.6313	0.230927	0.141801	0.0309803	ZH6_S1	0.984217	--	uncharacterized protein LOC100797300 isoform X1 [Glycine max]
arahy.0CM1H8	0.247779	0	0	0	ZH6_S1	1	--	Adenine nucleotide alpha hydrolases-like superfamily protein
arahy.U3MJA7	43.5594	21.0772	13.2213	9.21752	ZH6_S1	0.516127	--	saposin B domain-containing protein
arahy.7IXS5T	15.5132	0.109829	3.18168	3.12663	ZH6_S1	0.794904	--	beta-amyrin synthase isoform X1 [Glycine max]
arahy.909U31	10.2071	4.41207	2.43046	1.14737	ZH6_S1	0.567743	--	uncharacterized protein LOC100788456 isoform X1 [Glycine max]
arahy.Y9LXYY	1.05007	0.0973707	0.0785939	0	ZH6_S1	0.907272	--	acid phosphatase
arahy.KULZ0F	0.642049	0.0986195	0.106514	0.0408216	ZH6_S1	0.834102	--	Vps51/Vps67 family (components of vesicular transport) protein
arahy.15R771	0.464663	0	0	0	ZH6_S1	1	--	Unknown protein
arahy.6FN146	18.323	0.945168	0.576798	0.185407	ZH6_S1	0.948416	LOB	LOB domain-containing protein 21
arahy.SS1VDK	8.25723	0.150447	0.599269	2.83539	ZH6_S1	0.656618	--	trehalose-6-phosphate phosphatase
Novel04340	22.73	3.25715	8.34199	4.05855	ZH6_S1	0.632997	GRAS	--
arahy.97WALL	35.8871	1.14298	0.124791	0.0340793	ZH6_S1	0.968151	--	subtilisin-like serine protease 2
arahy.5IM6J0	35.5637	0	0	0.132433	ZH6_S1	0.996276	--	Non-specific lipid-transfer protein, putative
arahy.Q339KD	10.7516	0.0394548	0	0	ZH6_S1	0.99633	--	Unknown protein
arahy.YJXG1G	2.30714	0.56767	0.924042	0.711802	ZH6_S1	0.599485	--	uncharacterized protein LOC100819024 isoform X2 [Glycine max]
arahy.HEXM1C	0.959706	0	0	0	ZH6_S1	1	AUX/IAA	auxin response factor 19
arahy.4ZJF7J	0.434448	0.120555	0	0	ZH6_S1	0.722511	--	protein TOPLESS-like isoform X2 [Glycine max]
arahy.M4RUY8	27.0385	5.01226	2.14957	1.499	ZH6_S1	0.814625	--	QWRF motif-containing protein 8-like isoform X1 [Glycine max]
arahy.PK90TP	14.5175	1.60505	1.93718	1.9851	ZH6_S1	0.863261	--	E3 ubiquitin-protein ligase RGLG2-like isoform X2 [Glycine max]
arahy.BCJ26C	0.232957	0	0	0	ZH6_S1	1	--	probable pectinesterase/pectinesterase inhibitor 17-like [Glycine max]
arahy.57CZ3J	1.4838	0.272513	0.0189528	0	ZH6_S1	0.816342	--	ureide permease 1
arahy.V8YXJU	1.0739	0.305892	0.411303	0.0547938	ZH6_S1	0.617002	--	RING/U-box superfamily protein
arahy.48KEPM	91.9293	17.3209	4.37045	0.581219	ZH6_S1	0.811584	--	beta-xylosidase 3
arahy.S801EL	17.3939	0.535811	0.714358	0.957789	ZH6_S1	0.944935	--	protein serine/threonine phosphatases
arahy.YIM4MN	0.894911	0.429545	0.0718024	0.0261439	ZH6_S1	0.520014	--	UNC93-like protein 1-like [Glycine max]
arahy.IFTQ93	1.34308	0.122796	0.533571	0.291428	ZH6_S1	0.602725	--	villin-3-like isoform X3 [Glycine max]
arahy.50AH1U	46.0071	1.91052	2.81295	0.445328	ZH6_S1	0.938858	--	SAUR-like auxin-responsive protein family
Novel00314	32.5607	14.8426	13.9224	12.4662	ZH6_S1	0.544156	--	--
arahy.SQM4K2	46.8282	21.793	20.0409	14.9469	ZH6_S1	0.534618	--	serine/threonine protein phosphatase 2A
arahy.E47YJJ	5.45346	2.14786	0.910441	0.747344	ZH6_S1	0.606148	--	ATP-binding/protein serine/threonine kinase [Glycine max]
arahy.E0CBZR	3.88732	0.849125	1.20884	1.05556	ZH6_S1	0.68903	--	organic cation/carnitine transporter 2
arahy.QR900V	8.42248	0	0	0	ZH6_S1	1	--	Unknown protein
arahy.FKEV40	11.9056	1.56304	1.57122	0.671134	ZH6_S1	0.868026	--	Heavy metal transport/detoxification superfamily protein
arahy.IAMR94	3.18782	0.756296	0	0	ZH6_S1	0.762755	--	unknown protein
arahy.XSHW5Z	37.5492	10.7923	9.52781	2.99596	ZH6_S1	0.712582	--	ATP synthase subunit C family protein
arahy.W35MPH	1035.75	53.1364	24.0965	9.63223	ZH6_S1	0.948698	--	Unknown protein
arahy.IQP8BH	54.1997	25.7401	13.9116	7.64524	ZH6_S1	0.525089	--	nucleobase-ascorbate transporter 7
arahy.F6CHDN	22.5355	8.49337	6.50161	4.7503	ZH6_S1	0.623112	--	calcium-dependent protein kinase 33
arahy.EH6AZ8	44.9843	0.0276113	0	0.213087	ZH6_S1	0.995263	--	Cysteine proteinases superfamily protein
arahy.99ISIC	235.489	4.24437	2.48363	2.37623	ZH6_S1	0.981976	--	uncharacterized protein LOC102665532 isoform X7 [Glycine max]
arahy.6W4GGI	2.82614	0	0	0	ZH6_S1	1	--	cytochrome b5-like heme/steroid-binding domain protein
arahy.X2S259	16.3426	0.135853	0.209332	0	ZH6_S1	0.987191	AP2-EREBP	ethylene-responsive transcription factor 7-like [Glycine max]
arahy.FDEL0C	0.278554	0.126588	0.0459494	0	ZH6_S1	0.545554	--	beta-1,4-xylosyltransferase, putative
arahy.D8MM68	14.1654	2.74003	3.38656	1.2488	ZH6_S1	0.760928	--	expansin-like A2
arahy.5CXD2A	5.93932	0.0241629	0.178906	0	ZH6_S1	0.969878	--	Calmodulin binding protein-like
arahy.G3RHVP	7.19652	1.75025	1.56008	0.579696	ZH6_S1	0.756793	--	uncharacterized protein LOC100809811 isoform X1 [Glycine max]
arahy.PUH2BT	12.0847	1.15601	1.04664	0.593957	ZH6_S1	0.904341	--	putative phospholipid-transporting ATPase 9-like isoform X1 [Glycine max]
arahy.6PQ8NL	3.54688	1.23196	0.270425	0.0820584	ZH6_S1	0.652663	--	uncharacterized protein LOC102669532 isoform X2 [Glycine max]
arahy.DQ3LYR	0.102791	0.00776036	0.0269746	0.0368347	ZH6_S1	0.641654	--	receptor serine/threonine kinase, putative
arahy.S40QI3	27.3481	6.04306	8.57585	7.03549	ZH6_S1	0.686419	--	RHOMBOID-like 2
arahy.A1MQRB	215.329	5.77355	2.42056	1.15766	ZH6_S1	0.973187	--	protein notum homolog isoform X1 [Glycine max]
arahy.C0Q7J8	21.0266	3.31336	3.77395	3.73645	ZH6_S1	0.820515	--	chorismate mutase 1
arahy.RZ8KW2	0.677367	0	0	0	ZH6_S1	1	--	Chaperone DnaJ-domain superfamily protein
arahy.UP2C0E	40.6769	10.0585	4.57463	4.37471	ZH6_S1	0.752721	--	clathrin interactor EPSIN 2-like isoform X3 [Glycine max]
arahy.EBSD6D	9.70883	1.27267	3.98626	4.05878	ZH6_S1	0.58195	HB	Homeobox-leucine zipper protein family
arahy.MY1TBE	0.192448	0	0	0	ZH6_S1	1	--	photosystem I P700 chlorophyll A apoprotein A2
arahy.2A63GV	5.14344	0.0158103	0.0502654	0.0556506	ZH6_S1	0.98918	--	sucrose transporter 4
arahy.624Z3W	35.9288	6.08462	3.92945	0.184567	ZH6_S1	0.830648	--	Peroxidase family protein
arahy.STU076	32.6681	0.856964	0.979185	0.435472	ZH6_S1	0.970026	--	glycerol-3-phosphate dehydrogenase [NAD(+)] GPDHC1, cytosolic-like [Glycine max]
arahy.S15BQI	4.09514	0.106744	0.423301	1.61079	ZH6_S1	0.606657	--	trehalose-6-phosphate phosphatase
arahy.0D7IHD	1.5021	0	0	0	ZH6_S1	1	--	unknown protein
arahy.S3NECA	2.85827	0.270639	0.238196	0.150387	ZH6_S1	0.905314	--	receptor-like protein kinase 4
arahy.4TLV5E	0.11016	0	0	0.0254609	ZH6_S1	0.768873	--	putative indole-3-acetic acid-amido synthetase GH3.9
arahy.WKI3HS	0.300341	0.10014	0.0220498	0.0401427	ZH6_S1	0.666579	--	disease resistance protein (TIR-NBS-LRR class), putative
arahy.6SHE48	124.071	2.0607	1.04094	0.338242	ZH6_S1	0.983391	--	Gibberellin-regulated family protein
arahy.D6EDPL	0.902352	0	0.194775	0.149295	ZH6_S1	0.784147	--	nodulin MtN21 /EamA-like transporter family protein
arahy.7N8JZK	0.140019	0	0	0	ZH6_S1	1	--	serine/threonine-protein phosphatase 7 long form homolog [Glycine max]
arahy.2KT40Z	11.3027	1.95883	3.62823	1.78298	ZH6_S1	0.678993	--	RING-H2 finger protein 2B
Novel01447	0.5653	0.0367531	0	0	ZH6_S1	0.934985	--	--
arahy.SDH2U8	0.676136	0.0606537	0.0591259	0.088076	ZH6_S1	0.869736	--	exocyst subunit exo70 family protein B1
arahy.36HCF2	8.15854	3.112	1.81053	1.45668	ZH6_S1	0.61856	--	probable methyltransferase PMT13-like [Glycine max]
arahy.CM68RF	19.5145	7.3557	6.12563	4.6969	ZH6_S1	0.623065	--	trehalose phosphate synthase
arahy.2G23RK	47.331	23.5976	12.0659	6.45922	ZH6_S1	0.501435	--	isocitrate dehydrogenase V
arahy.5I47GQ	8.34199	1.34355	0.496446	0.321971	ZH6_S1	0.838942	--	Cyclopropane-fatty-acyl-phospholipid synthase
arahy.WDZX9F	100.519	13.8664	13.6988	23.012	ZH6_S1	0.771068	Trihelix	trihelix transcription factor GT-2-like [Glycine max]
arahy.05JZX6	5.0863	0	0	0	ZH6_S1	1	--	unknown protein
arahy.FIK9JS	16.7627	5.94204	4.51741	1.51524	ZH6_S1	0.64552	--	trehalose-6-phosphate phosphatase
arahy.S01ZUK	0.121801	0	0	0.0428941	ZH6_S1	0.647834	--	UDP-Glycosyltransferase superfamily protein
arahy.RV96D7	11.6378	2.43304	1.93371	0.3973	ZH6_S1	0.790937	--	Unknown protein
arahy.EAA3GC	124.648	15.5141	2.29438	0.521168	ZH6_S1	0.875537	--	vacuolar H+-translocating inorganic pyrophosphatase
arahy.E5H8ET	60.1065	13.7504	6.85996	5.85319	ZH6_S1	0.771233	--	AMMECR1 family
arahy.G9FESD	0.209011	0	0.0108852	0	ZH6_S1	0.94792	--	laccase 7
arahy.U9RBLI	47.3996	1.5787	0.846451	0.335869	ZH6_S1	0.966694	--	probable polygalacturonase-like [Glycine max]
arahy.LN5JTA	0.797243	0	0	0	ZH6_S1	1	--	phospholipase D alpha 1
arahy.QSN6ZX	9.31606	0.494823	1.55878	1.77943	ZH6_S1	0.808993	--	peptidoglycan-binding LysM domain-containing protein
arahy.P8SAN8	1.7909	0.0103514	0	0	ZH6_S1	0.99422	--	glyoxal oxidase-related protein
arahy.SR4TTD	10.3984	0	0.0187032	0	ZH6_S1	0.998201	--	Pectate lyase family protein
arahy.TR0XLC	44.3616	19.5396	11.3758	4.59214	ZH6_S1	0.559538	--	probable polygalacturonase-like [Glycine max]
arahy.I9S39B	51.7304	19.531	24.8258	20.2996	ZH6_S1	0.520092	--	mannose-1-phosphate guanyltransferase
arahy.3W6VHH	0.2892	0.116988	0	0	ZH6_S1	0.595477	--	MEI2-like protein 1
arahy.C7EUSB	44.5472	13.4309	10.0556	6.37378	ZH6_S1	0.698502	--	charged multivesicular body protein
arahy.49015S	4.82221	0.669931	0.534561	0	ZH6_S1	0.861074	--	caffeoylshikimate esterase-like isoform X2 [Glycine max]
arahy.1K6RTV	0.51577	0	0	0	ZH6_S1	1	--	subtilisin-like serine protease 2
arahy.H8DQQQ	4.24745	1.63634	1.43097	1.88963	ZH6_S1	0.555114	--	allene oxide synthase
arahy.X8J8BT	3.06734	0.309884	0.784821	0.30962	ZH6_S1	0.744137	G2-like	myb family transcription factor APL-like isoform X2 [Glycine max]
arahy.KWS21K	0.905398	0.363612	0.195879	0.380712	ZH6_S1	0.579508	--	Maturase n=4 Tax=Mesangiospermae RepID=G7I9T4_MEDTR
arahy.V1JR8G	0.173594	0	0	0	ZH6_S1	1	--	Unknown protein
arahy.L3E896	9.52412	1.17103	1.4827	0.274386	ZH6_S1	0.844322	--	Protein phosphatase 2C family protein
arahy.68AXRD	13.3315	6.61224	5.98062	3.88711	ZH6_S1	0.504013	--	Protein kinase superfamily protein
arahy.Y4KAES	2.56834	0	0	0.0271219	ZH6_S1	0.98944	--	Sec14p-like phosphatidylinositol transfer family protein
arahy.13YW1E	161.03	1.78792	0.782468	1.15022	ZH6_S1	0.988897	--	Fatty acid hydroxylase superfamily
arahy.LX1BG3	19.461	7.17202	8.92423	7.34618	ZH6_S1	0.541431	--	3-hydroxyacyl-CoA dehydrogenase family protein
arahy.VC16G5	3.76952	1.81819	1.49506	0.790796	ZH6_S1	0.51766	--	NAD(P)-binding Rossmann-fold superfamily protein
arahy.UKF2DL	0.411888	0.109599	0.191875	0.0476372	ZH6_S1	0.534158	--	alpha/beta-hydrolase superfamily protein
arahy.MZ3A4Y	0.375293	0	0	0	ZH6_S1	1	--	Unknown protein
arahy.JI131A	4.34879	0	0	0	ZH6_S1	1	--	organ-specific protein S2-like isoform X1 [Glycine max]
arahy.9M2IAS	1.85566	0.730527	0.593368	0.157271	ZH6_S1	0.606325	--	sieve element occlusion protein
arahy.J3RNWS	0.139388	0.0189776	0	0	ZH6_S1	0.86385	--	O-acyltransferase (WSD1-like) family protein
arahy.KZ0R87	11.6639	2.00368	1.17412	0.847457	ZH6_S1	0.828215	--	mediator of RNA polymerase II transcription subunit 33A-like [Glycine max]
arahy.XQH9IF	53.0125	23.8018	9.52861	4.98446	ZH6_S1	0.551015	--	Succinyl-CoA ligase, alpha subunit
arahy.SA0PEV	0.511884	0	0.03538	0.0214703	ZH6_S1	0.930883	--	cyclic nucleotide-gated ion channel-like protein
Novel01645	3.29961	1.39908	0.811179	1.54185	ZH6_S1	0.532719	--	--
arahy.LSG577	380.973	48.2793	16.6051	11.2868	ZH6_S1	0.873274	--	vacuolar H+-translocating inorganic pyrophosphatase
arahy.TP4UKQ	1.05803	0	0	0.0759276	ZH6_S1	0.928237	--	ZCF37
arahy.582VFN	31.1067	1.51606	2.22986	2.9333	ZH6_S1	0.905702	--	DUF761 domain protein
arahy.Z77BB1	13.3478	3.29677	1.07125	0.0522419	ZH6_S1	0.753011	--	tetraspanin-6 [Glycine max]
arahy.132YY9	7.10267	0.926453	0.088498	0	ZH6_S1	0.869563	--	metacaspase 9
arahy.6U038X	55.0909	1.20938	0.211288	0.315431	ZH6_S1	0.978048	--	GDSL-like Lipase/Acylhydrolase superfamily protein
arahy.QG1Z6M	16.2922	5.61186	3.81185	1.65636	ZH6_S1	0.65555	--	epoxide hydrolase-like protein
arahy.3Q5GH0	1.30495	0.138156	0.042001	0.0764647	ZH6_S1	0.894129	--	U-box domain-containing protein 7-like [Glycine max]
arahy.P4NYDW	28.8366	0.173357	0	0.21082	ZH6_S1	0.992689	--	Unknown protein
arahy.M3CBH7	0.627735	0.152468	0	0	ZH6_S1	0.757113	--	TRAF-like family protein
arahy.J8M6QI	0.88415	0	0.00849083	0	ZH6_S1	0.990397	--	Cellulose synthase family protein
arahy.77WSFP	24.5857	8.48589	5.38927	2.61612	ZH6_S1	0.654845	--	Cytochrome C1 family
arahy.AE54YU	0.373201	0.163008	0.149393	0.108383	ZH6_S1	0.563218	--	LRR and NB-ARC domain disease resistance protein
arahy.9W3900	4.99069	1.10778	0.593741	0	ZH6_S1	0.77803	--	Chaperone DnaJ-domain superfamily protein
arahy.QD4BFE	0.118074	0	0	0	ZH6_S1	1	--	Unknown protein
arahy.9WK1AZ	15.9317	2.76788	1.73516	1.20117	ZH6_S1	0.826266	--	Actin cross-linking protein
arahy.4BNM0X	7.74074	0.87972	0.541304	0.251444	ZH6_S1	0.886352	--	B-cell receptor-associated 31-like
arahy.HC1E0U	0.27948	0	0	0	ZH6_S1	1	--	chalcone synthase [Glycine max]
arahy.860WY5	5.60081	0.501549	0.618401	0.1972	ZH6_S1	0.889587	--	2-oxoglutarate (2OG) and Fe(II)-dependent oxygenase superfamily protein
arahy.C5K50D	25.6347	5.53643	6.0639	7.19792	ZH6_S1	0.719212	TAZ	BTB and TAZ domain protein 2
arahy.ZLD5YB	0.121157	0.00911663	0.0193229	0	ZH6_S1	0.840513	--	Protein kinase superfamily protein
arahy.GGAH0G	0.514363	0.174934	0.0148435	0	ZH6_S1	0.659901	--	lipid phosphate phosphatase 3
Novel04850	3.74213	1.64194	0.500042	0.0999181	ZH6_S1	0.561228	--	--
arahy.LMNG4E	18.3144	5.81724	3.16534	2.55622	ZH6_S1	0.682368	--	Uncharacterised protein family (UPF0497)
arahy.B8HNR5	0.565481	0.145205	0.0249853	0	ZH6_S1	0.743219	--	UDP-glucosyltransferase family protein
arahy.X4HBY6	0.181805	0	0.0149045	0	ZH6_S1	0.918019	--	terpene synthase family, metal-binding domain protein
arahy.AX28JG	0.102093	0	0	0	ZH6_S1	1	--	protein YLS7-like [Glycine max]
arahy.C407E2	38.5304	7.07731	3.3846	1.38631	ZH6_S1	0.816319	--	1-aminocyclopropane-1-carboxylate oxidase homolog 1-like [Glycine max]
arahy.J9PAND	6.93319	2.93119	1.77485	1.6001	ZH6_S1	0.577223	--	extracellular ligand-gated ion channel protein
arahy.Y2CNA9	0.375508	0.126534	0	0	ZH6_S1	0.663033	--	protein kinase family protein
arahy.E02I8A	1.33972	0.207589	0	0.16252	ZH6_S1	0.84505	--	NAD(P)-binding Rossmann-fold superfamily protein
arahy.18IZSC	24.9194	0.899529	0.873661	0.839077	ZH6_S1	0.963903	--	glutaredoxin 4
arahy.EE333K	19.813	4.20822	2.05402	1.9487	ZH6_S1	0.787603	--	ubiquitin ligase SINAT3
arahy.78KBF3	0.214047	0	0	0	ZH6_S1	1	--	cation/H+ exchanger 23
arahy.5WL8RC	0.626356	0	0	0	ZH6_S1	1	--	Vacuole, catalytic n=1 Tax=Theobroma cacao RepID=UPI00042B20B5
arahy.ABQ8F7	1.16514	0	0	0	ZH6_S1	1	--	cytochrome C biogenesis protein CcmFC protein
arahy.6X3X3D	52.533	3.1967	2.77597	6.44389	ZH6_S1	0.877336	--	maternal effect embryo arrest 59
arahy.UM0YXB	7.98846	0.179843	0.0640947	0	ZH6_S1	0.977487	--	chloride channel A
arahy.B3SD72	17.5814	2.9814	4.75089	4.03263	ZH6_S1	0.729778	--	PLAC8 family protein
arahy.D28SYC	17.3941	0	0	0	ZH6_S1	1	--	L-ascorbate oxidase homolog [Glycine max]
arahy.6H6MU0	8.02289	2.52573	3.44376	2.50627	ZH6_S1	0.570758	--	alpha/beta hydrolase domain-containing protein 13-like [Glycine max]
Novel03884	8.55287	3.8854	2.13388	1.7999	ZH6_S1	0.54572	--	--
arahy.MYRR9C	0.4008	0.0432784	0.0611476	0	ZH6_S1	0.847436	TF	WRKY family transcription factor
arahy.ZK4XM6	0.679364	0	0	0	ZH6_S1	1	--	chalcone synthase [Glycine max]
arahy.Q437N3	6.21665	2.18482	0.595154	0.0783284	ZH6_S1	0.648554	--	Mo25 family protein
arahy.38ICVW	0.523364	0.0217452	0	0	ZH6_S1	0.958451	--	Peroxidase superfamily protein
arahy.VIJ10A	7.27791	0.731743	0.0811659	0	ZH6_S1	0.899457	--	gibberellin 20 oxidase 1-like [Glycine max]
arahy.S0T1TB	10.671	0	0	0	ZH6_S1	1	--	Unknown protein
arahy.9VA34X	8.57943	2.2703	0.817625	1.10988	ZH6_S1	0.735378	--	phospho-N-acetylmuramoyl-pentapeptide-transferase, putative
arahy.E7UEEQ	24.8258	6.90883	4.79432	4.62497	ZH6_S1	0.721707	--	MATE efflux family protein
arahy.BE3YYP	5.65397	2.20646	1.3641	0.667442	ZH6_S1	0.609751	--	NADH-ubiquinone oxidoreductase chain n=2 Tax=Medicago RepID=G7I9R4_MEDTR
arahy.B9G130	0.123675	0	0	0	ZH6_S1	1	--	Unknown protein
arahy.H55E6Q	8.36889	3.68399	1.49575	0.925216	ZH6_S1	0.559799	--	glycolipid transfer protein 1
arahy.7I9PPU	0.190983	0	0	0	ZH6_S1	1	--	protein LURP-one-related 15-like [Glycine max]
arahy.WNL5D9	1.03203	0.016903	0	0	ZH6_S1	0.983622	--	Cytochrome P450 superfamily protein
arahy.X7P2RE	0.939517	0	0.0289758	0.0527518	ZH6_S1	0.943852	--	uncharacterized protein LOC100527788 isoform X1 [Glycine max]
arahy.I3116U	9.92963	1.88107	0.566514	0.330056	ZH6_S1	0.81056	--	Peroxidase superfamily protein
Novel03632	0.725074	0	0	0	ZH6_S1	1	--	--
arahy.UT7DLW	5.34638	0	0.395792	0.0900777	ZH6_S1	0.92597	--	disease-resistance response protein
arahy.34YUZ5	45.951	18.6127	13.8757	13.9027	ZH6_S1	0.594945	--	UDP-glucuronic acid decarboxylase 1
arahy.X35675	167.183	0	0	0	ZH6_S1	1	--	phloem specific protein
arahy.PN90EB	5.07765	0.376682	0.610565	0.298142	ZH6_S1	0.879754	--	ATP synthase F0 subunit 4 n=15 Tax=Liliopsida RepID=G9HNT5_PHODC
arahy.C9JWVP	6.42619	2.4641	1.16976	1.42616	ZH6_S1	0.616554	--	nodulin MtN21 /EamA-like transporter family protein
arahy.ZIND9X	0.870998	0.0151354	0	0.0454929	ZH6_S1	0.947769	--	ATP-binding/protein serine/threonine kinase [Glycine max]
arahy.15ZR5C	51.2991	12.6743	4.27476	3.9481	ZH6_S1	0.752934	--	enolase-phosphatase E1-like isoform X1 [Glycine max]
arahy.TJMK61	26.9266	0.474695	0.173255	0	ZH6_S1	0.982371	--	adiponectin receptor protein 2-like isoform X4 [Glycine max]
arahy.G6UQCB	8.43546	3.93123	2.01561	1.49317	ZH6_S1	0.533964	--	uncharacterized protein LOC100790929 isoform X1 [Glycine max]
arahy.T7IL5E	0.996886	0.0464229	0	0.0963363	ZH6_S1	0.903363	--	alpha/beta-hydrolase superfamily protein
Novel01790	109.297	28.863	29.298	22.6761	ZH6_S1	0.731942	--	--
arahy.PP514R	25.9847	6.61331	2.74968	1.47761	ZH6_S1	0.745492	--	myosin 1
arahy.SB0591	0.160636	0	0	0	ZH6_S1	1	--	acyl-coenzyme A thioesterase-like protein
arahy.V66ZH8	1.46895	0.715684	0.278408	0.240075	ZH6_S1	0.512791	--	transmembrane amino acid transporter family protein
arahy.6P3KM7	6.97495	0.23427	0.194371	0.394951	ZH6_S1	0.943376	--	uncharacterized protein LOC100797300 isoform X1 [Glycine max]
arahy.K5PPYT	20.8833	2.04053	1.13783	0.165283	ZH6_S1	0.902289	--	ATP binding/protein serine/threonine kinase [Glycine max]
arahy.HWR5S2	0.217625	0	0	0	ZH6_S1	1	--	FAR1 DNA-binding domain protein
Novel00877	0.425274	0	0	0	ZH6_S1	1	--	--
arahy.344JWA	3.83624	0.48499	0.241231	0.0759449	ZH6_S1	0.873577	--	Major facilitator superfamily protein
arahy.BIR89S	1.95488	0.410026	0.186519	0.139147	ZH6_S1	0.790255	--	Tetratricopeptide repeat (TPR)-like superfamily protein
arahy.BY2PXQ	0.155537	0.0460601	0.0488128	0	ZH6_S1	0.686166	--	Fcf2 pre-rRNA processing protein
Novel02634	66.2767	21.9923	7.58546	3.92815	ZH6_S1	0.668174	--	--
arahy.D5QY89	57.685	28.2141	14.5268	9.06525	ZH6_S1	0.510894	--	protein MID1-COMPLEMENTING ACTIVITY 1-like isoform X1 [Glycine max]
arahy.Y8ZFR1	12.7596	5.8989	1.56972	1.14769	ZH6_S1	0.537688	C2H2	zinc finger protein MAGPIE-like [Glycine max]
arahy.ZE0YJW	65.521	5.5762	5.85293	4.87649	ZH6_S1	0.910671	--	uncharacterized protein LOC100811015 [Glycine max]
arahy.J127JW	80.955	35.5024	24.2576	13.4102	ZH6_S1	0.561455	--	cytochrome B-c1 complex subunit 7
arahy.2LG1YU	6.8432	0.0574739	0.257565	0.356243	ZH6_S1	0.947942	--	BRI1 kinase inhibitor 1-like [Glycine max]
arahy.F10EXU	27.268	12.426	4.01082	1.72188	ZH6_S1	0.544301	IWS1	probable mediator of RNA polymerase II transcription subunit 26c-like isoform X2 [Glycine max]
arahy.6Y4DBB	1.8599	0	0.0493618	0	ZH6_S1	0.97346	--	beta glucosidase 11
arahy.LMT3MR	0.78704	0	0	0.0357709	ZH6_S1	0.95455	--	polyphenol oxidase A1, chloroplastic-like [Glycine max]
arahy.EGV3B5	0.952676	0.0876447	0.0238624	0.0217213	ZH6_S1	0.908001	--	serine carboxypeptidase-like 3
arahy.P4AZJC	47.7965	10.2501	8.59547	6.24405	ZH6_S1	0.785546	--	telomere repeat-binding protein 3-like isoform X2 [Glycine max]
arahy.8Y4891	34.3007	6.01575	2.80555	2.67734	ZH6_S1	0.824617	--	Phosphatidylinositol-4-phosphate 5-kinase family protein
arahy.ZS7YSR	25.8598	7.62652	7.15643	4.11974	ZH6_S1	0.705082	--	seed linoleate 9S-lipoxygenase
arahy.J0RZ19	30.7285	4.74996	2.14797	2.1241	ZH6_S1	0.845422	--	Unknown protein
arahy.U7HMBF	38.3059	11.1908	4.82035	4.58702	ZH6_S1	0.707857	bHLH	transcription factor bHLH74-like [Glycine max]
arahy.VM96MN	54.7606	20.34	15.7922	11.7748	ZH6_S1	0.628564	--	AP-1 complex subunit sigma-like protein
arahy.0J4ETI	3390.32	335.737	180.349	70.5597	ZH6_S1	0.900972	--	Bifunctional inhibitor/lipid-transfer protein/seed storage 2S albumin superfamily protein
Novel01726	20.1234	5.26515	6.6999	5.49512	ZH6_S1	0.667059	--	--
arahy.EMWD5T	18.0232	5.86143	2.68696	2.31161	ZH6_S1	0.674784	--	Copper amine oxidase family protein
arahy.WRSV9R	22.9098	11.2098	3.57854	1.37349	ZH6_S1	0.510698	--	carboxylesterase 1-like [Glycine max]
arahy.ZNHH9V	14.9201	6.37218	1.26783	1.43147	ZH6_S1	0.572913	--	mannose-1-phosphate guanyltransferase
arahy.XBFI6K	6.33991	0.210718	0	0	ZH6_S1	0.966763	--	arabinogalactan peptide 20-like [Glycine max]
arahy.ZXK4R3	0.137966	0.0255932	0	0	ZH6_S1	0.814496	--	helix loop helix DNA-binding domain protein
arahy.03UVXD	1.52017	0	0	0	ZH6_S1	1	--	SAUR-like auxin-responsive protein family
arahy.6CEF8S	14.8644	0.179573	0	0	ZH6_S1	0.987919	--	SAUR-like auxin-responsive protein family
arahy.RPW9LI	0.211443	0	0	0	ZH6_S1	1	--	Eukaryotic aspartyl protease family protein
arahy.P7B4TL	1.83752	0.389509	0.0820023	0.0824996	ZH6_S1	0.788025	--	pleiotropic drug resistance 12
arahy.N59HKK	63.5826	27.3439	10.1958	5.59168	ZH6_S1	0.569947	--	Ubiquinol-cytochrome c reductase complex protein n=2 Tax=Papilionoideae RepID=G7L638_MEDTR
arahy.0YB7S3	57.3717	5.84309	1.42559	0.553259	ZH6_S1	0.898154	--	peptide transporter 1
arahy.B0V0GT	0.779537	0.0256145	0.0271453	0	ZH6_S1	0.965178	--	nodulin MtN21 /EamA-like transporter family protein
arahy.6E7ZI3	7.96042	0	0	0	ZH6_S1	1	--	ABC-2 type transporter family protein
arahy.D33YE9	38.9521	0.226439	0.475009	0.866917	ZH6_S1	0.977744	--	auxin transporter-like protein 1-like [Glycine max]
arahy.KG38KX	20.1495	4.70768	1.8019	0.567278	ZH6_S1	0.766362	--	Unknown protein
arahy.A21TQ1	23.5516	2.4325	5.84079	3.18074	ZH6_S1	0.752001	--	epoxide hydrolase
arahy.MV37LX	13.8497	0.986256	4.06554	3.34356	ZH6_S1	0.706453	C2C2-GATA	GATA transcription factor 12
arahy.9A532S	0.126126	0	0	0	ZH6_S1	1	--	probable ADP-ribosylation factor GTPase-activating protein AGD15-like [Glycine max]
arahy.J77J84	64.4012	15.774	6.82187	5.57857	ZH6_S1	0.755067	--	polygalacturonase non-catalytic protein
arahy.VX34ZV	9.60829	2.24305	2.07943	1.42877	ZH6_S1	0.766551	--	uncharacterized vacuolar membrane protein YML018C-like isoform X2 [Glycine max]
arahy.PRGW6K	0.164663	0	0	0	ZH6_S1	1	--	Unknown protein
arahy.4S6EST	0.167062	0.0550254	0	0	ZH6_S1	0.670629	--	peptide transporter 2
arahy.UAR2GI	31.6633	6.52094	4.02709	2.08239	ZH6_S1	0.794053	--	senescence-associated protein
arahy.77T7YG	102.872	33.6225	15.5183	15.5131	ZH6_S1	0.673162	--	Galactose oxidase/kelch repeat superfamily protein
arahy.95I963	1.94993	0.223271	0.0155282	0	ZH6_S1	0.885498	--	chalcone synthase [Glycine max]
arahy.V9TZWK	48.6208	24.0218	9.74038	6.0407	ZH6_S1	0.505936	--	subtilisin-like serine protease 2
arahy.40EERC	127.813	3.83421	1.52459	0.259152	ZH6_S1	0.970001	TF	sequence-specific DNA binding transcription factors
arahy.2YN4P9	0.172261	0	0	0	ZH6_S1	1	TF	ethylene-responsive transcription factor 3-like [Glycine max]
arahy.UI5U2V	1.91989	0	0	0	ZH6_S1	1	MYB	myb transcription factor
arahy.XZ1J2P	0.211492	0	0	0	ZH6_S1	1	--	sulfotransferase 2A
arahy.ZJGI0U	4.73005	0.190992	0.493573	1.13566	ZH6_S1	0.759906	--	respiratory burst oxidase homologue D
arahy.P8UK8X	5.9632	1.53586	0.997125	0.707021	ZH6_S1	0.742444	--	DNA photolyase family protein
arahy.QDGG7S	0.101702	0.0318708	0	0	ZH6_S1	0.686625	--	60S ribosomal L21-like protein
arahy.9DR5PQ	3.09181	0.370293	0.216294	0.177556	ZH6_S1	0.880234	--	probable copper-transporting ATPase HMA5-like [Glycine max]
arahy.P3DMLF	0.192693	0.0570634	0.0604736	0	ZH6_S1	0.686166	--	ovate family protein 12
arahy.DP0G5T	0.163129	0.0268651	0	0	ZH6_S1	0.835314	--	trehalose-6-phosphate phosphatase
arahy.XN0VL7	0.191882	0	0	0	ZH6_S1	1	--	Regulator of chromosome condensation (RCC1) family protein
arahy.NG4XB7	6.46555	0.761736	0.36916	0.891574	ZH6_S1	0.862104	--	dehydration-responsive protein RD22
arahy.Q9SIB4	0.303658	0	0	0	ZH6_S1	1	--	Unknown protein
Novel04311	16.3602	1.10295	0.58912	0.917297	ZH6_S1	0.932583	--	--
arahy.L3EDXB	4.59736	0.0981467	0.111949	0.13897	ZH6_S1	0.969772	--	cytosolic endo-beta-N-acetylglucosaminidase-like [Glycine max]
arahy.C9KQAV	24.4589	10.3845	5.1354	3.21731	ZH6_S1	0.575431	--	probable galacturonosyltransferase 14-like [Glycine max]
arahy.KR3NZ5	10.0783	1.12888	0.923943	1.10294	ZH6_S1	0.887989	--	protein CHUP1, chloroplastic-like isoform X2 [Glycine max]
arahy.L8AQGG	1.25656	0.0475996	0.0478167	0	ZH6_S1	0.961946	--	purple acid phosphatase 10
arahy.J8IJ4G	357.719	41.1011	70.7206	39.477	ZH6_S1	0.802301	--	plasma membrane intrinsic protein 2
arahy.MV7C6C	0.380589	0.137984	0.151091	0.0660203	ZH6_S1	0.603007	--	dentin sialophosphoprotein-like isoform X1 [Glycine max]
arahy.G4V3K2	2.39661	0.454235	0.764899	1.11171	ZH6_S1	0.536131	--	Phosphatidylinositol 3- and 4-kinase family protein
[truncated: 18,123 more rows]

## Sheet: common
geneID	ZH16_S1	ZH16_S2	ZH16_S3	ZH16_S4	Stage with highest CS score	Highest CS score in ZH16	ZH6_S1	ZH6_S2	ZH6_S3	ZH6_S4	Stage with highest CS score	Highest CS score in ZH6	TF Family	Functional Annotation
[truncated: 12,932 more rows]
