# Supplementary material for: Global Transcriptome and Co-Expression Network Analyses Revealed Hub Genes Controlling Seed Size/Weight and/or Oil Content in Peanut
Source: Plants (Basel). 2023 Aug 31;12(17):3144. doi: 10.3390/plants12173144 (PMC10490140; doi:10.3390/plants12173144)
Supplement: Supplementary file 1 [file plants-12-03144-s001.zip › Table S4.xlsx]

## Sheet: Readme
Table S4 Information of DEGs between ZH16 and ZH6.

## Sheet: Up
GeneID	Differential expression stages	TF family	Fuction	ZH16_S1	ZH16_S2	ZH16_S3	ZH16_S4	ZH6_S1	ZH6_S2	ZH6_S3	ZH6_S4
arahy.YX753W	ZH16_S1_vs_ZH6_S1;ZH16_S2_vs_ZH6_S2;ZH16_S3_vs_ZH6_S3;ZH16_S4_vs_ZH6_S4	--	uncharacterized protein C18orf8 isoform X2 [Glycine max]	81.8382	125.145	61.4523	61.8717	30.8143	35.2023	21.335	19.6478
Novel01049	ZH16_S1_vs_ZH6_S1;ZH16_S2_vs_ZH6_S2;ZH16_S3_vs_ZH6_S3;ZH16_S4_vs_ZH6_S4	--	UDP-glucose dehydrogenase [Medicago truncatula]>gi|355496418|gb|AES77621.1| UDP-glucose 6-dehydrogenase family protein [Medicago truncatula]	374.081	30.7076	31.165	26.1321	25.7898	1.09641	1.01763	0.432608
arahy.4DFA8P	ZH16_S1_vs_ZH6_S1;ZH16_S2_vs_ZH6_S2;ZH16_S3_vs_ZH6_S3;ZH16_S4_vs_ZH6_S4	--	Plastid-lipid associated protein PAP / fibrillin family protein	25.7692	39.8937	17.6525	15.4893	1.32351	0.823453	0.476118	0.0722373
arahy.76LV04	ZH16_S1_vs_ZH6_S1;ZH16_S2_vs_ZH6_S2;ZH16_S3_vs_ZH6_S3;ZH16_S4_vs_ZH6_S4	--	uncharacterized protein LOC102664163 isoform X7 [Glycine max]	14.6199	30.0445	10.1747	18.7485	0.197677	0.356877	0.160602	0
arahy.GE1UVX	ZH16_S1_vs_ZH6_S1;ZH16_S2_vs_ZH6_S2;ZH16_S3_vs_ZH6_S3;ZH16_S4_vs_ZH6_S4	--	PI-PLC X domain-containing protein At5g67130-like [Glycine max]	25.3859	12.1207	5.80828	4.84419	2.35061	0.200053	0.0193229	0
arahy.6PTW1V	ZH16_S1_vs_ZH6_S1;ZH16_S2_vs_ZH6_S2;ZH16_S3_vs_ZH6_S3;ZH16_S4_vs_ZH6_S4	--	Pollen Ole e 1 allergen and extensin family protein	0.295036	1.10573	0.33808	0.233825	0.00538918	0	0.0145947	0
arahy.1X7LEL	ZH16_S1_vs_ZH6_S1;ZH16_S2_vs_ZH6_S2;ZH16_S3_vs_ZH6_S3;ZH16_S4_vs_ZH6_S4	--	cellulose synthase family protein	1.44879	6.95937	5.32853	7.08556	0.114677	0.330702	0.150102	0
arahy.DVS0GI	ZH16_S1_vs_ZH6_S1;ZH16_S2_vs_ZH6_S2;ZH16_S3_vs_ZH6_S3;ZH16_S4_vs_ZH6_S4	--	protein TOPLESS-like isoform X2 [Glycine max]	4.34258	12.1637	4.35129	6.23119	1.14407	0.794034	0.182646	0
arahy.E7M0T9	ZH16_S1_vs_ZH6_S1;ZH16_S2_vs_ZH6_S2;ZH16_S3_vs_ZH6_S3;ZH16_S4_vs_ZH6_S4	--	Unknown protein	3.1452	2.99559	2.50574	1.52338	0.418899	0.209465	0.0742741	0
arahy.M24FW3	ZH16_S1_vs_ZH6_S1;ZH16_S2_vs_ZH6_S2;ZH16_S3_vs_ZH6_S3;ZH16_S4_vs_ZH6_S4	--	Pentatricopeptide repeat (PPR) superfamily protein	0.516097	1.29763	0.913928	1.27067	0.0106194	0.0540835	0.0527212	0
arahy.R9SY1C	ZH16_S1_vs_ZH6_S1;ZH16_S2_vs_ZH6_S2;ZH16_S3_vs_ZH6_S3;ZH16_S4_vs_ZH6_S4	--	Ribosomal protein L6 family	7.28628	10.8385	5.20829	3.80411	0.673976	1.48342	1.95882	1.00138
arahy.DL4VJP	ZH16_S1_vs_ZH6_S1;ZH16_S2_vs_ZH6_S2;ZH16_S3_vs_ZH6_S3;ZH16_S4_vs_ZH6_S4	--	Unknown protein	11.9759	11.267	11.4632	14.4501	0.77711	1.11531	0.239763	0.0873
Novel00355	ZH16_S1_vs_ZH6_S1;ZH16_S2_vs_ZH6_S2;ZH16_S3_vs_ZH6_S3;ZH16_S4_vs_ZH6_S4	--	PREDICTED: uncharacterized protein LOC103829852 [Brassica rapa]	2.28195	6.04715	4.26268	7.1842	0.271152	0.293688	0.107989	0
Novel00547	ZH16_S1_vs_ZH6_S1;ZH16_S2_vs_ZH6_S2;ZH16_S3_vs_ZH6_S3;ZH16_S4_vs_ZH6_S4	--	--	1.92309	2.62497	4.4792	5.59591	0.205539	0.333172	0.386528	0
arahy.98L393	ZH16_S1_vs_ZH6_S1;ZH16_S2_vs_ZH6_S2;ZH16_S3_vs_ZH6_S3;ZH16_S4_vs_ZH6_S4	--	probable galacturonosyltransferase 14-like [Glycine max]	15.7817	5.02761	2.98748	2.16914	0.830241	0.176223	0.0105819	0.0192648
arahy.W5G0Q3	ZH16_S1_vs_ZH6_S1;ZH16_S2_vs_ZH6_S2;ZH16_S3_vs_ZH6_S3;ZH16_S4_vs_ZH6_S4	--	Nucleotide-sugar transporter/ sugar porter n=3 Tax=Zea mays RepID=B6UBN6_MAIZE	6.03227	10.173	4.26367	7.662	0.830039	0.305419	0.148828	0.0280298
arahy.PC9MZ4	ZH16_S1_vs_ZH6_S1;ZH16_S2_vs_ZH6_S2;ZH16_S3_vs_ZH6_S3;ZH16_S4_vs_ZH6_S4	--	Unknown protein	14.8521	80.9026	35.1692	56.0923	3.61148	14.623	12.766	8.40957
arahy.06ILPZ	ZH16_S1_vs_ZH6_S1;ZH16_S2_vs_ZH6_S2;ZH16_S3_vs_ZH6_S3;ZH16_S4_vs_ZH6_S4	--	Unknown protein	5.31544	87.0344	14.9077	50.2314	0.864394	2.35991	0.468183	0
arahy.724RE1	ZH16_S1_vs_ZH6_S1;ZH16_S2_vs_ZH6_S2;ZH16_S3_vs_ZH6_S3;ZH16_S4_vs_ZH6_S4	--	LETM1-like protein	16.2201	22.0149	9.59854	10.6353	1.81471	0.808602	0.12933	0
Novel02875	ZH16_S1_vs_ZH6_S1;ZH16_S2_vs_ZH6_S2;ZH16_S3_vs_ZH6_S3;ZH16_S4_vs_ZH6_S4	--	polyprotein [Glycine max]	8.85398	7.79359	9.02146	5.38427	0.645419	0	0	0
arahy.IFTQ93	ZH16_S1_vs_ZH6_S1;ZH16_S2_vs_ZH6_S2;ZH16_S3_vs_ZH6_S3;ZH16_S4_vs_ZH6_S4	--	villin-3-like isoform X3 [Glycine max]	6.68117	35.8919	15.6957	17.9492	1.34308	0.122796	0.533571	0.291428
Novel03694	ZH16_S1_vs_ZH6_S1;ZH16_S2_vs_ZH6_S2;ZH16_S3_vs_ZH6_S3;ZH16_S4_vs_ZH6_S4	--	--	1.72383	0.767163	0.830501	1.88618	0.192694	0	0	0
Novel01410	ZH16_S1_vs_ZH6_S1;ZH16_S2_vs_ZH6_S2;ZH16_S3_vs_ZH6_S3;ZH16_S4_vs_ZH6_S4	--	PREDICTED: uncharacterized protein LOC103844431 [Brassica rapa]	0.79041	3.27415	1.80314	1.81911	0.0983014	0.165069	0.155284	0.117618
Novel02227	ZH16_S1_vs_ZH6_S1;ZH16_S2_vs_ZH6_S2;ZH16_S3_vs_ZH6_S3;ZH16_S4_vs_ZH6_S4	--	PREDICTED: selenium-binding protein 1 [Glycine max]>gi|734350405|gb|KHN12352.1| Selenium-binding protein 2 [Glycine soja]	1.84241	2.70671	1.12167	1.61885	0.0945749	0.0525169	0	0
Novel03229	ZH16_S1_vs_ZH6_S1;ZH16_S2_vs_ZH6_S2;ZH16_S3_vs_ZH6_S3;ZH16_S4_vs_ZH6_S4	--	PREDICTED: pachytene checkpoint protein 2 homolog isoform X2 [Glycine max]	2.42553	5.67729	4.32435	10.8016	0.131545	0.143625	0.0593741	0
Novel02851	ZH16_S1_vs_ZH6_S1;ZH16_S2_vs_ZH6_S2;ZH16_S3_vs_ZH6_S3;ZH16_S4_vs_ZH6_S4	--	Sterol 3-beta-glucosyltransferase [Medicago truncatula]	2.89899	8.00555	6.14756	7.45106	0.349757	0.158303	0.556252	0.0410575
Novel00300	ZH16_S1_vs_ZH6_S1;ZH16_S2_vs_ZH6_S2;ZH16_S3_vs_ZH6_S3;ZH16_S4_vs_ZH6_S4	--	--	3.05521	5.33538	9.09567	10.9823	0.452315	0.511647	0.055679	0
Novel00260	ZH16_S1_vs_ZH6_S1;ZH16_S2_vs_ZH6_S2;ZH16_S3_vs_ZH6_S3;ZH16_S4_vs_ZH6_S4	--	hypothetical protein POPTR_0004s11480g [Populus trichocarpa]>gi|550340841|gb|ERP62089.1| hypothetical protein POPTR_0004s11480g [Populus trichocarpa]	2.30128	19.3536	5.95109	7.36767	0.357765	0.295544	0.29359	0
Novel04164	ZH16_S1_vs_ZH6_S1;ZH16_S2_vs_ZH6_S2;ZH16_S3_vs_ZH6_S3;ZH16_S4_vs_ZH6_S4	--	--	1.81509	6.0462	4.01781	3.15913	0.206125	0	0.108537	0
arahy.IPBD8F	ZH16_S1_vs_ZH6_S1;ZH16_S2_vs_ZH6_S2;ZH16_S3_vs_ZH6_S3;ZH16_S4_vs_ZH6_S4	--	solute carrier family 35 protein	0.869421	1.766	2.02783	2.60319	0.0722363	0	0.0139734	0
arahy.VC8V91	ZH16_S1_vs_ZH6_S1;ZH16_S2_vs_ZH6_S2;ZH16_S3_vs_ZH6_S3;ZH16_S4_vs_ZH6_S4	--	hydroxymethylglutaryl-CoA lyase	0.739404	5.3106	0.740816	1.40527	0.0854295	0.19875	0	0
arahy.V3Q138	ZH16_S1_vs_ZH6_S1;ZH16_S2_vs_ZH6_S2;ZH16_S3_vs_ZH6_S3;ZH16_S4_vs_ZH6_S4	--	methyl esterase 11	4.06623	5.89249	2.33869	2.79101	1.10918	0.399087	0.357599	0.160535
Novel03276	ZH16_S1_vs_ZH6_S1;ZH16_S2_vs_ZH6_S2;ZH16_S3_vs_ZH6_S3;ZH16_S4_vs_ZH6_S4	--	hypothetical protein ARAX_ADH18B08-023 [Arachis duranensis]	7.80734	12.9087	8.7119	8.27667	0.817719	0.514304	0.264407	0
arahy.UB8UIZ	ZH16_S1_vs_ZH6_S1;ZH16_S2_vs_ZH6_S2;ZH16_S3_vs_ZH6_S3;ZH16_S4_vs_ZH6_S4	--	NAD(P)-binding rossmann-fold protein	2.1384	12.7608	5.24692	8.52794	0.319425	0.21598	0.14417	0
arahy.88RA0A	ZH16_S1_vs_ZH6_S1;ZH16_S2_vs_ZH6_S2;ZH16_S3_vs_ZH6_S3;ZH16_S4_vs_ZH6_S4	--	plant/T10O8-60 protein	7.58741	18.9287	7.28248	6.07556	0.422845	0.270556	0.158698	0.194996
arahy.LW185J	ZH16_S1_vs_ZH6_S1;ZH16_S2_vs_ZH6_S2;ZH16_S3_vs_ZH6_S3;ZH16_S4_vs_ZH6_S4	--	Clathrin, heavy chain	2.94993	4.2814	1.84788	2.97592	1.04814	0.894534	0.552554	0.261281
Novel03777	ZH16_S1_vs_ZH6_S1;ZH16_S2_vs_ZH6_S2;ZH16_S3_vs_ZH6_S3;ZH16_S4_vs_ZH6_S4	--	--	5.401	4.11888	3.95919	5.5381	0.159011	0.0981085	0.31897	0
arahy.9YX67Z	ZH16_S1_vs_ZH6_S1;ZH16_S2_vs_ZH6_S2;ZH16_S3_vs_ZH6_S3;ZH16_S4_vs_ZH6_S4	--	disease resistance protein (CC-NBS-LRR class) family protein	10.8058	13.0588	2.09314	2.0063	1.24404	0.21582	0.0508657	0
Novel03597	ZH16_S1_vs_ZH6_S1;ZH16_S2_vs_ZH6_S2;ZH16_S3_vs_ZH6_S3;ZH16_S4_vs_ZH6_S4	TF	nuclear transcription factor Y subunit A-3 [Arachis hypogaea]	10.4547	7.14755	3.46437	2.90699	0.538239	0.0221845	0.0626884	0
arahy.GE5ZL0	ZH16_S1_vs_ZH6_S1;ZH16_S2_vs_ZH6_S2;ZH16_S3_vs_ZH6_S3;ZH16_S4_vs_ZH6_S4	--	homogentisate phytyltransferase 1	9.22582	69.4324	9.46495	19.7032	0.885464	0.598423	0.188551	0
arahy.REKD2E	ZH16_S1_vs_ZH6_S1;ZH16_S2_vs_ZH6_S2;ZH16_S3_vs_ZH6_S3;ZH16_S4_vs_ZH6_S4	--	Clathrin, heavy chain	2.4459	9.57585	4.54529	5.87178	0.45114	0.121186	0.066441	0
Novel03145	ZH16_S1_vs_ZH6_S1;ZH16_S2_vs_ZH6_S2;ZH16_S3_vs_ZH6_S3;ZH16_S4_vs_ZH6_S4	--	--	0.545948	2.57194	1.21397	1.95639	0.0553892	0.137584	0.0282245	0.025692
arahy.LY2VHI	ZH16_S1_vs_ZH6_S1;ZH16_S2_vs_ZH6_S2;ZH16_S3_vs_ZH6_S3;ZH16_S4_vs_ZH6_S4	--	Pre-mRNA-splicing factor ATP-dependent RNA helicase	8.39132	13.3038	10.2499	8.84439	3.50931	4.62762	3.90196	3.62465
arahy.AY7U99	ZH16_S1_vs_ZH6_S1;ZH16_S2_vs_ZH6_S2;ZH16_S3_vs_ZH6_S3;ZH16_S4_vs_ZH6_S4	--	Raffinose synthase family protein	2.21604	5.87492	2.04362	3.66597	0.158239	0.101249	0.115518	0
arahy.KKF5XK	ZH16_S1_vs_ZH6_S1;ZH16_S2_vs_ZH6_S2;ZH16_S3_vs_ZH6_S3;ZH16_S4_vs_ZH6_S4	--	tRNA (guanine(37)-N1)-methyltransferase, putative	1.60206	4.71671	2.06324	3.13853	0.373008	0.622729	0.375333	0.269513
Novel01018	ZH16_S1_vs_ZH6_S1;ZH16_S2_vs_ZH6_S2;ZH16_S3_vs_ZH6_S3;ZH16_S4_vs_ZH6_S4	--	hypothetical protein MTR_2g098330 [Medicago truncatula]	3.45094	3.65673	0.662	2.24944	0.166609	0.128728	0	0
arahy.J0E0JD	ZH16_S1_vs_ZH6_S1;ZH16_S2_vs_ZH6_S2;ZH16_S3_vs_ZH6_S3;ZH16_S4_vs_ZH6_S4	--	nuclear export mediator factor NEMF-like isoform X5 [Glycine max]	1.89495	4.88688	1.69664	2.82485	0.213184	0.220136	0.0408708	0
Novel03537	ZH16_S1_vs_ZH6_S1;ZH16_S2_vs_ZH6_S2;ZH16_S3_vs_ZH6_S3;ZH16_S4_vs_ZH6_S4	--	PREDICTED: uncharacterized protein LOC100818428 [Glycine max]>gi|734437620|gb|KHN48624.1| Ribosomal RNA small subunit methyltransferase G [Glycine soja]	11.3055	22.0584	6.12684	8.67988	0.677535	0.960674	0.495893	0.0823561
arahy.0S2PTK	ZH16_S1_vs_ZH6_S1;ZH16_S2_vs_ZH6_S2;ZH16_S3_vs_ZH6_S3;ZH16_S4_vs_ZH6_S4	--	alpha dioxygenase	10.5272	0.435407	3.13212	0.83892	0.876261	0	0	0
arahy.3AG3I6	ZH16_S1_vs_ZH6_S1;ZH16_S2_vs_ZH6_S2;ZH16_S3_vs_ZH6_S3;ZH16_S4_vs_ZH6_S4	--	Pentatricopeptide repeat (PPR) superfamily protein	2.18302	9.58511	4.43326	5.03491	0.454902	0.191172	0.052095	0.0334748
Novel00209	ZH16_S1_vs_ZH6_S1;ZH16_S2_vs_ZH6_S2;ZH16_S3_vs_ZH6_S3;ZH16_S4_vs_ZH6_S4	--	hypothetical protein B456_002G103400 [Gossypium raimondii]	1.16796	1.58049	2.72072	1.53967	0.0163836	0.017018	0	0
Novel03554	ZH16_S1_vs_ZH6_S1;ZH16_S2_vs_ZH6_S2;ZH16_S3_vs_ZH6_S3;ZH16_S4_vs_ZH6_S4	--	--	1.05077	2.38376	1.52208	1.26478	0.142341	0	0.0642435	0
Novel01041	ZH16_S1_vs_ZH6_S1;ZH16_S2_vs_ZH6_S2;ZH16_S3_vs_ZH6_S3;ZH16_S4_vs_ZH6_S4	--	--	4.13618	4.16488	6.68908	8.94017	0.531383	0	0.202932	0
arahy.DM14FR	ZH16_S1_vs_ZH6_S1;ZH16_S2_vs_ZH6_S2;ZH16_S3_vs_ZH6_S3;ZH16_S4_vs_ZH6_S4	--	protein LONGIFOLIA 2-like isoform X2 [Glycine max]	22.8205	3.60848	1.59986	1.25828	1.42282	0.0863688	0.0214263	0
Novel03396	ZH16_S1_vs_ZH6_S1;ZH16_S2_vs_ZH6_S2;ZH16_S3_vs_ZH6_S3;ZH16_S4_vs_ZH6_S4	--	hypothetical protein PHAVU_L006100g [Phaseolus vulgaris]>gi|561039748|gb|ESW35909.1| hypothetical protein PHAVU_L006100g [Phaseolus vulgaris]	0.97971	5.10273	2.03988	3.40756	0.0893207	0.367021	0.171335	0.0550475
arahy.T8EGM7	ZH16_S1_vs_ZH6_S1;ZH16_S2_vs_ZH6_S2;ZH16_S3_vs_ZH6_S3;ZH16_S4_vs_ZH6_S4	--	calmodulin-binding family protein	1.28262	2.34797	2.19514	2.33688	0.135964	0.155459	0	0
Novel04926	ZH16_S1_vs_ZH6_S1;ZH16_S2_vs_ZH6_S2;ZH16_S3_vs_ZH6_S3;ZH16_S4_vs_ZH6_S4	--	LisH domain and HEAT repeat-containing protein KIAA1468-like protein [Glycine soja]	3.92712	10.1652	1.75095	2.21662	0.83577	0.65007	0.0484507	0
arahy.MU1UQI	ZH16_S1_vs_ZH6_S1;ZH16_S2_vs_ZH6_S2;ZH16_S3_vs_ZH6_S3;ZH16_S4_vs_ZH6_S4	--	Remorin family protein	14.2939	14.7209	7.77262	10.2319	1.2259	0.343709	0.267852	0
arahy.MRFN9C	ZH16_S1_vs_ZH6_S1;ZH16_S2_vs_ZH6_S2;ZH16_S3_vs_ZH6_S3;ZH16_S4_vs_ZH6_S4	TF	myb transcription factor	1.06056	3.00871	1.06231	0.66375	0.0800551	0.025572	0.0496805	0
arahy.6AU7NA	ZH16_S1_vs_ZH6_S1;ZH16_S2_vs_ZH6_S2;ZH16_S3_vs_ZH6_S3;ZH16_S4_vs_ZH6_S4	--	protein SCO1 homolog 2, mitochondrial-like [Glycine max]	9.20691	8.29739	5.21967	4.80687	0.923402	0.251271	0.148548	0
Novel01946	ZH16_S1_vs_ZH6_S1;ZH16_S2_vs_ZH6_S2;ZH16_S3_vs_ZH6_S3;ZH16_S4_vs_ZH6_S4	--	--	1.95601	2.54091	2.99578	2.55629	0.348674	0	0.0314754	0
arahy.MEJ08X	ZH16_S1_vs_ZH6_S1;ZH16_S2_vs_ZH6_S2;ZH16_S3_vs_ZH6_S3;ZH16_S4_vs_ZH6_S4	--	glycoside hydrolase family 81 protein	0.299082	1.04354	0.543116	0.360533	0.0139685	0.0701744	0.0189144	0
Novel00323	ZH16_S1_vs_ZH6_S1;ZH16_S2_vs_ZH6_S2;ZH16_S3_vs_ZH6_S3;ZH16_S4_vs_ZH6_S4	--	FRA1 , putative [Medicago truncatula]	2.72437	7.63767	4.90713	3.39952	0.236437	0.320433	0	0
arahy.CSG8WT	ZH16_S1_vs_ZH6_S1;ZH16_S2_vs_ZH6_S2;ZH16_S3_vs_ZH6_S3;ZH16_S4_vs_ZH6_S4	--	Unknown protein	33.4463	35.1388	15.0276	18.3784	3.43541	0	0.341111	0
arahy.3F914A	ZH16_S1_vs_ZH6_S1;ZH16_S2_vs_ZH6_S2;ZH16_S3_vs_ZH6_S3;ZH16_S4_vs_ZH6_S4	--	Pentatricopeptide repeat (PPR) superfamily protein	0.764065	2.11903	1.7058	1.33359	0.120583	0.0449528	0.0181421	0.0330285
Novel00275	ZH16_S1_vs_ZH6_S1;ZH16_S2_vs_ZH6_S2;ZH16_S3_vs_ZH6_S3;ZH16_S4_vs_ZH6_S4	--	--	3.97692	3.48392	3.81455	2.55986	0.27212	0.328804	0	0
arahy.CG1IFF	ZH16_S1_vs_ZH6_S1;ZH16_S2_vs_ZH6_S2;ZH16_S3_vs_ZH6_S3;ZH16_S4_vs_ZH6_S4	--	lipid transfer protein	334.337	22.376	172.46	159.007	14.3145	1.10367	5.12329	0
arahy.2QVW8D	ZH16_S1_vs_ZH6_S1;ZH16_S2_vs_ZH6_S2;ZH16_S3_vs_ZH6_S3;ZH16_S4_vs_ZH6_S4	--	sucrose transporter 2	3.49252	26.9629	6.76212	24.6817	0.216016	2.1652	0.20893	0.152147
arahy.6GSA8E	ZH16_S1_vs_ZH6_S1;ZH16_S2_vs_ZH6_S2;ZH16_S3_vs_ZH6_S3;ZH16_S4_vs_ZH6_S4	--	Unknown protein	0.853969	4.16886	2.15554	0.719423	0.164861	0.433019	0.101239	0
arahy.04J95Q	ZH16_S1_vs_ZH6_S1;ZH16_S2_vs_ZH6_S2;ZH16_S3_vs_ZH6_S3;ZH16_S4_vs_ZH6_S4	--	protein PHYLLO, chloroplastic isoform X2 [Glycine max]	2.86418	10.908	6.03334	8.15627	0.47233	0.382864	0.0752437	0
arahy.IY6P5S	ZH16_S1_vs_ZH6_S1;ZH16_S2_vs_ZH6_S2;ZH16_S3_vs_ZH6_S3;ZH16_S4_vs_ZH6_S4	--	Protein kinase superfamily protein	10.5052	19.6667	9.54091	12.4925	0.907063	0.444681	0.210696	0.443379
arahy.6F5CM0	ZH16_S1_vs_ZH6_S1;ZH16_S2_vs_ZH6_S2;ZH16_S3_vs_ZH6_S3;ZH16_S4_vs_ZH6_S4	--	Cell wall protein EXP2 n=1 Tax=Mirabilis jalapa RepID=Q84L40_MIRJA	41.0964	75.9559	23.5211	16.7392	1.55524	3.87602	0.420864	0.0522419
arahy.HR29B7	ZH16_S1_vs_ZH6_S1;ZH16_S2_vs_ZH6_S2;ZH16_S3_vs_ZH6_S3;ZH16_S4_vs_ZH6_S4	--	chorismate mutase 1	5.08838	0.875522	1.0267	1.39047	0.723692	0.0195522	0.0207207	0.137643
arahy.BBI6IF	ZH16_S1_vs_ZH6_S1;ZH16_S2_vs_ZH6_S2;ZH16_S3_vs_ZH6_S3;ZH16_S4_vs_ZH6_S4	--	Disease resistance protein (TIR-NBS-LRR class) family	1.58693	6.21538	2.11792	2.29326	0.440377	0.714526	0.176419	0.142582
arahy.BG5WH1	ZH16_S1_vs_ZH6_S1;ZH16_S2_vs_ZH6_S2;ZH16_S3_vs_ZH6_S3;ZH16_S4_vs_ZH6_S4	--	haloacid dehalogenase-like hydrolase domain protein	13.4703	15.2452	4.2252	2.17542	0.691261	0.347546	0.0231437	0
arahy.D1PGNE	ZH16_S1_vs_ZH6_S1;ZH16_S2_vs_ZH6_S2;ZH16_S3_vs_ZH6_S3;ZH16_S4_vs_ZH6_S4	--	NAD-dependent epimerase/dehydratase n=1 Tax=Leptolyngbya sp. PCC 7376 RepID=K9PVG9_9CYAN	31.6507	16.5963	5.88384	3.84788	1.68964	0.35996	0.192376	0
arahy.VYP3BN	ZH16_S1_vs_ZH6_S1;ZH16_S2_vs_ZH6_S2;ZH16_S3_vs_ZH6_S3;ZH16_S4_vs_ZH6_S4	--	ABC transporter G family member 11-like isoform X1 [Glycine max]	1.83886	8.25619	1.72081	4.87688	0.21437	0.185839	0	0
arahy.3DLK77	ZH16_S1_vs_ZH6_S1;ZH16_S2_vs_ZH6_S2;ZH16_S3_vs_ZH6_S3;ZH16_S4_vs_ZH6_S4	FHA	SMAD/FHA domain-containing protein	3.14183	7.44221	3.36419	3.08733	0.623929	0.458295	0.0782239	0.0389734
Novel03564	ZH16_S1_vs_ZH6_S1;ZH16_S2_vs_ZH6_S2;ZH16_S3_vs_ZH6_S3;ZH16_S4_vs_ZH6_S4	--	--	4.8553	6.53486	10.0109	9.02261	0.849584	0.241403	0.322449	0
arahy.R0WKHG	ZH16_S1_vs_ZH6_S1;ZH16_S2_vs_ZH6_S2;ZH16_S3_vs_ZH6_S3;ZH16_S4_vs_ZH6_S4	--	nucleosome assembly protein 1	8.70197	8.41713	6.38216	4.02153	0.512545	0.496706	0.109583	0.187824
arahy.4X19VW	ZH16_S1_vs_ZH6_S1;ZH16_S2_vs_ZH6_S2;ZH16_S3_vs_ZH6_S3;ZH16_S4_vs_ZH6_S4	--	Unknown protein	3.79154	15.5422	12.1328	10.4863	0.413765	0.246333	0.0266795	0
arahy.4A5SH7	ZH16_S1_vs_ZH6_S1;ZH16_S2_vs_ZH6_S2;ZH16_S3_vs_ZH6_S3;ZH16_S4_vs_ZH6_S4	--	ATP-dependent RNA helicase, putative	5.92834	5.47604	8.29103	13.3784	0.873722	0.464174	0.527093	0.2879
arahy.QT8TPN	ZH16_S1_vs_ZH6_S1;ZH16_S2_vs_ZH6_S2;ZH16_S3_vs_ZH6_S3;ZH16_S4_vs_ZH6_S4	--	phosphoinositide phospholipase C 6-like [Glycine max]	0.808131	8.81795	1.57723	2.52335	0.14566	0.355032	0.149388	0
Novel02952	ZH16_S1_vs_ZH6_S1;ZH16_S2_vs_ZH6_S2;ZH16_S3_vs_ZH6_S3;ZH16_S4_vs_ZH6_S4	--	PREDICTED: uncharacterized protein LOC104648517 [Solanum lycopersicum]	0.850584	4.41586	0.688833	1.82924	0.11276	0.127233	0.0190858	0
arahy.LFW8SM	ZH16_S1_vs_ZH6_S1;ZH16_S2_vs_ZH6_S2;ZH16_S3_vs_ZH6_S3;ZH16_S4_vs_ZH6_S4	FAR1	myosin, putative	24.8949	35.1393	22.6219	20.9675	2.22379	0.410073	0.224967	0
arahy.G8XV3D	ZH16_S1_vs_ZH6_S1;ZH16_S2_vs_ZH6_S2;ZH16_S3_vs_ZH6_S3;ZH16_S4_vs_ZH6_S4	--	Regulator of chromosome condensation (RCC1) family protein	4.89933	8.74416	3.65077	3.39749	0.370148	0.272681	0.116806	0.0303788
arahy.RG9N1V	ZH16_S1_vs_ZH6_S1;ZH16_S2_vs_ZH6_S2;ZH16_S3_vs_ZH6_S3;ZH16_S4_vs_ZH6_S4	--	phosphatidylinositol 3,4,5-trisphosphate 3-phosphatase and dual-specificity protein phosphatase PTEN-like [Glycine max]	0.590662	2.03478	1.43718	0.853065	0	0.0359232	0.0312196	0
arahy.YR2ABN	ZH16_S1_vs_ZH6_S1;ZH16_S2_vs_ZH6_S2;ZH16_S3_vs_ZH6_S3;ZH16_S4_vs_ZH6_S4	--	aspartate aminotransferase 3	126.034	83.6066	63.0689	41.2085	10.1961	9.65691	8.48548	4.32049
arahy.IZ8PXE	ZH16_S1_vs_ZH6_S1;ZH16_S2_vs_ZH6_S2;ZH16_S3_vs_ZH6_S3;ZH16_S4_vs_ZH6_S4	--	laccase 7	17.3336	76.3363	16.0154	12.0145	0.723136	2.54218	0.359028	0
arahy.L34ABA	ZH16_S1_vs_ZH6_S1;ZH16_S2_vs_ZH6_S2;ZH16_S3_vs_ZH6_S3;ZH16_S4_vs_ZH6_S4	--	Protein kinase superfamily protein	4.43365	12.7628	5.48464	8.68189	0.305273	0.507703	0.225471	0
arahy.ZHL4EB	ZH16_S1_vs_ZH6_S1;ZH16_S2_vs_ZH6_S2;ZH16_S3_vs_ZH6_S3;ZH16_S4_vs_ZH6_S4	FAR1	Unknown protein	11.2829	13.367	7.09296	6.6948	2.67565	2.94152	2.04935	2.65441
Novel04880	ZH16_S1_vs_ZH6_S1;ZH16_S2_vs_ZH6_S2;ZH16_S3_vs_ZH6_S3;ZH16_S4_vs_ZH6_S4	--	PREDICTED: uncharacterized protein LOC104763239 [Camelina sativa]	1.91418	5.50338	2.86655	2.34582	0.103951	0	0	0
arahy.KG76U8	ZH16_S1_vs_ZH6_S1;ZH16_S2_vs_ZH6_S2;ZH16_S3_vs_ZH6_S3;ZH16_S4_vs_ZH6_S4	--	tubulin folding cofactor E	4.79383	33.3054	12.545	19.5148	0.824128	0.220906	0.72435	0
arahy.IUS8SN	ZH16_S1_vs_ZH6_S1;ZH16_S2_vs_ZH6_S2;ZH16_S3_vs_ZH6_S3;ZH16_S4_vs_ZH6_S4	--	cytokinin dehydrogenase 5-like [Glycine max]	1.50217	2.95266	2.29469	3.00272	0.180127	0.0519686	0.188746	0.152733
arahy.9W4GU5	ZH16_S1_vs_ZH6_S1;ZH16_S2_vs_ZH6_S2;ZH16_S3_vs_ZH6_S3;ZH16_S4_vs_ZH6_S4	--	disease resistance protein	1.99259	0.775036	0.619099	0.414016	0.161215	0.0131292	0.00767468	0
arahy.BXAK4K	ZH16_S1_vs_ZH6_S1;ZH16_S2_vs_ZH6_S2;ZH16_S3_vs_ZH6_S3;ZH16_S4_vs_ZH6_S4	--	Unknown protein	6.86811	11.1832	3.41245	2.63077	0.824352	2.69269	0.87052	0.553435
Novel00141	ZH16_S1_vs_ZH6_S1;ZH16_S2_vs_ZH6_S2;ZH16_S3_vs_ZH6_S3;ZH16_S4_vs_ZH6_S4	--	downstream neighbor of Son-like protein, putative [Medicago truncatula]	0.952212	3.72147	1.25609	2.00095	0.172956	0.0112283	0.0146373	0
Novel00957	ZH16_S1_vs_ZH6_S1;ZH16_S2_vs_ZH6_S2;ZH16_S3_vs_ZH6_S3;ZH16_S4_vs_ZH6_S4	--	--	2.78348	8.63094	3.43165	4.30254	0.217267	0.593347	0.187953	0
arahy.QD4BFE	ZH16_S1_vs_ZH6_S1;ZH16_S2_vs_ZH6_S2;ZH16_S3_vs_ZH6_S3;ZH16_S4_vs_ZH6_S4	--	Unknown protein	1.88821	5.92803	4.36942	2.73178	0.118074	0	0	0
arahy.0JH0K6	ZH16_S1_vs_ZH6_S1;ZH16_S2_vs_ZH6_S2;ZH16_S3_vs_ZH6_S3;ZH16_S4_vs_ZH6_S4	--	cystathionine gamma-synthase	39.7228	35.4585	30.5904	24.7787	2.6227	1.18001	0.573511	0.228408
Novel01934	ZH16_S1_vs_ZH6_S1;ZH16_S2_vs_ZH6_S2;ZH16_S3_vs_ZH6_S3;ZH16_S4_vs_ZH6_S4	--	--	1.36275	2.68064	3.885	3.37661	0.182595	0	0.0887511	0
arahy.2F8F1S	ZH16_S1_vs_ZH6_S1;ZH16_S2_vs_ZH6_S2;ZH16_S3_vs_ZH6_S3;ZH16_S4_vs_ZH6_S4	--	Cytochrome P450 superfamily protein	10.4828	19.347	1.66673	1.61702	0.274157	0.277606	0.0766927	0
arahy.Z9H0PS	ZH16_S1_vs_ZH6_S1;ZH16_S2_vs_ZH6_S2;ZH16_S3_vs_ZH6_S3;ZH16_S4_vs_ZH6_S4	FAR1	protein FAR1-RELATED SEQUENCE 7-like isoform X2 [Glycine max]	8.18131	17.7371	9.80918	10.0144	0.647902	0.393266	0.147193	0
Novel02203	ZH16_S1_vs_ZH6_S1;ZH16_S2_vs_ZH6_S2;ZH16_S3_vs_ZH6_S3;ZH16_S4_vs_ZH6_S4	--	--	8.91639	4.63608	16.7078	13.2919	0.697436	0.242621	0.381055	0
arahy.9YN5EZ	ZH16_S1_vs_ZH6_S1;ZH16_S2_vs_ZH6_S2;ZH16_S3_vs_ZH6_S3;ZH16_S4_vs_ZH6_S4	--	calmodulin-binding family protein	12.0627	30.0691	6.62616	8.47289	0.811839	0.872323	0.159215	0
Novel02320	ZH16_S1_vs_ZH6_S1;ZH16_S2_vs_ZH6_S2;ZH16_S3_vs_ZH6_S3;ZH16_S4_vs_ZH6_S4	--	--	7.2736	24.6975	10.5672	12.3305	0.798766	0.554386	0.145599	0
arahy.9U7L2M	ZH16_S1_vs_ZH6_S1;ZH16_S2_vs_ZH6_S2;ZH16_S3_vs_ZH6_S3;ZH16_S4_vs_ZH6_S4	--	protein COBRA-like [Glycine max]	184.664	52.1936	35.4423	23.4894	15.8398	1.28433	0.800673	0.0787956
arahy.EKRS97	ZH16_S1_vs_ZH6_S1;ZH16_S2_vs_ZH6_S2;ZH16_S3_vs_ZH6_S3;ZH16_S4_vs_ZH6_S4	--	metal-nicotianamine transporter YSL3-like isoform X3 [Glycine max]	0.668718	3.7174	1.15524	1.41183	0.0452469	0	0	0
Novel00845	ZH16_S1_vs_ZH6_S1;ZH16_S2_vs_ZH6_S2;ZH16_S3_vs_ZH6_S3;ZH16_S4_vs_ZH6_S4	--	PREDICTED: protein indeterminate-domain 7 isoform X1 [Erythranthe guttatus]	1.67458	5.07829	1.17736	1.52667	0.228955	0.181997	0.0206682	0
arahy.89SBZN	ZH16_S1_vs_ZH6_S1;ZH16_S2_vs_ZH6_S2;ZH16_S3_vs_ZH6_S3;ZH16_S4_vs_ZH6_S4	--	choline-phosphate cytidylyltransferase	7.70952	14.8386	9.61069	7.78645	0.815735	0.330329	0.0783111	0
Novel03340	ZH16_S1_vs_ZH6_S1;ZH16_S2_vs_ZH6_S2;ZH16_S3_vs_ZH6_S3;ZH16_S4_vs_ZH6_S4	--	--	2.55447	3.92086	1.53281	8.01883	0.280222	0.117524	0.0869498	0
arahy.I2I3GG	ZH16_S1_vs_ZH6_S1;ZH16_S2_vs_ZH6_S2;ZH16_S3_vs_ZH6_S3;ZH16_S4_vs_ZH6_S4	GRAS	Unknown protein	6.17637	7.54635	1.99592	2.49553	0.312474	0.245826	0.0236893	0
arahy.PV0ABM	ZH16_S1_vs_ZH6_S1;ZH16_S2_vs_ZH6_S2;ZH16_S3_vs_ZH6_S3;ZH16_S4_vs_ZH6_S4	--	Pentatricopeptide repeat (PPR) superfamily protein	0.915384	4.68771	1.61336	2.21098	0.123114	0.162283	0.071002	0
Novel01338	ZH16_S1_vs_ZH6_S1;ZH16_S2_vs_ZH6_S2;ZH16_S3_vs_ZH6_S3;ZH16_S4_vs_ZH6_S4	--	--	3.01216	9.63122	4.82485	7.91676	1.30671	1.53382	1.06338	1.59701
Novel03092	ZH16_S1_vs_ZH6_S1;ZH16_S2_vs_ZH6_S2;ZH16_S3_vs_ZH6_S3;ZH16_S4_vs_ZH6_S4	--	PREDICTED: probable protein phosphatase 2C 76-like isoform X1 [Glycine max]>gi|571496963|ref|XP_006593751.1| PREDICTED: probable protein phosphatase 2C 76-like isoform X3 [Glycine max]>gi|571496965|ref|XP_006593752.1| PREDICTED: probable protein phosphatase 2C 76-like isoform X4 [Glycine max]>gi|734376791|gb|KHN21432.1| Hypothetical protein glysoja_049157 [Glycine soja]	0.77797	2.74866	2.99909	3.74101	0.179648	0.904897	0.064824	0.433676
Novel00929	ZH16_S1_vs_ZH6_S1;ZH16_S2_vs_ZH6_S2;ZH16_S3_vs_ZH6_S3;ZH16_S4_vs_ZH6_S4	--	hypothetical protein PHAVU_008G025700g [Phaseolus vulgaris]>gi|561012526|gb|ESW11387.1| hypothetical protein PHAVU_008G025700g [Phaseolus vulgaris]	3.73273	6.69888	5.0766	5.37081	0.721431	0.2831	0.192959	0.117241
Novel02207	ZH16_S1_vs_ZH6_S1;ZH16_S2_vs_ZH6_S2;ZH16_S3_vs_ZH6_S3;ZH16_S4_vs_ZH6_S4	--	hypothetical protein PHAVU_006G010500g, partial [Phaseolus vulgaris]>gi|561019298|gb|ESW18069.1| hypothetical protein PHAVU_006G010500g, partial [Phaseolus vulgaris]	0.860402	1.89824	0.88103	0.995938	0.125526	0.0844513	0.0920653	0.035284
arahy.GJ5SQ4	ZH16_S1_vs_ZH6_S1;ZH16_S2_vs_ZH6_S2;ZH16_S3_vs_ZH6_S3;ZH16_S4_vs_ZH6_S4	--	Unknown protein	1.84926	8.80488	3.3275	3.97529	0.293084	0.167226	0.103932	0.051607
Novel03700	ZH16_S1_vs_ZH6_S1;ZH16_S2_vs_ZH6_S2;ZH16_S3_vs_ZH6_S3;ZH16_S4_vs_ZH6_S4	--	--	2.16849	4.18047	4.20391	2.42296	0.161315	0.0837807	0.100109	0
arahy.TZF9D3	ZH16_S1_vs_ZH6_S1;ZH16_S2_vs_ZH6_S2;ZH16_S3_vs_ZH6_S3;ZH16_S4_vs_ZH6_S4	--	RING finger protein 38-like [Glycine max]	6.3805	7.78086	7.22327	4.98832	0.5573	0.327045	0	0.074699
arahy.Y7DSHF	ZH16_S1_vs_ZH6_S1;ZH16_S2_vs_ZH6_S2;ZH16_S3_vs_ZH6_S3;ZH16_S4_vs_ZH6_S4	TF	WRKY family transcription factor family protein	4.39189	3.9505	2.66844	2.46407	0.587636	0.149052	0.0692152	0.0459784
arahy.Y9SFAF	ZH16_S1_vs_ZH6_S1;ZH16_S2_vs_ZH6_S2;ZH16_S3_vs_ZH6_S3;ZH16_S4_vs_ZH6_S4	--	cofactor-independent phosphoglycerate mutase	16.0187	15.818	14.8347	12.5287	1.29963	0.41094	0.312463	0.0839312
arahy.XS9HJ1	ZH16_S1_vs_ZH6_S1;ZH16_S2_vs_ZH6_S2;ZH16_S3_vs_ZH6_S3;ZH16_S4_vs_ZH6_S4	--	tRNA (guanine(37)-N1)-methyltransferase, putative	2.4786	3.94795	1.09142	1.3475	0.157762	0.067003	0.028483	0
arahy.XFK461	ZH16_S1_vs_ZH6_S1;ZH16_S2_vs_ZH6_S2;ZH16_S3_vs_ZH6_S3;ZH16_S4_vs_ZH6_S4	--	uncharacterized protein LOC100816954 isoform X2 [Glycine max]	7.78983	22.4813	11.5123	16.7802	0.373901	0	0.674993	0
arahy.RWD4IB	ZH16_S1_vs_ZH6_S1;ZH16_S2_vs_ZH6_S2;ZH16_S3_vs_ZH6_S3;ZH16_S4_vs_ZH6_S4	--	Pentatricopeptide repeat (PPR) superfamily protein	10.6565	11.7029	5.50476	5.07887	0.971912	0.361932	0.14126	0
Novel01108	ZH16_S1_vs_ZH6_S1;ZH16_S2_vs_ZH6_S2;ZH16_S3_vs_ZH6_S3;ZH16_S4_vs_ZH6_S4	--	--	10.378	4.82711	1.91365	2.40822	0.635254	0.129491	0.0722472	0
arahy.0IDF8B	ZH16_S1_vs_ZH6_S1;ZH16_S2_vs_ZH6_S2;ZH16_S3_vs_ZH6_S3;ZH16_S4_vs_ZH6_S4	LSD	LSD1 zinc finger family protein	27.5149	18.3471	15.8784	13.6465	8.54685	6.14395	7.07883	4.14905
Novel03605	ZH16_S1_vs_ZH6_S1;ZH16_S2_vs_ZH6_S2;ZH16_S3_vs_ZH6_S3;ZH16_S4_vs_ZH6_S4	--	PREDICTED: uncharacterized protein LOC102670263 [Glycine max]	1.08948	5.32087	2.99778	1.48973	0.0995012	0.258271	0.0785898	0.0865984
arahy.HGJ4AC	ZH16_S1_vs_ZH6_S1;ZH16_S2_vs_ZH6_S2;ZH16_S3_vs_ZH6_S3;ZH16_S4_vs_ZH6_S4	--	ATPase, F0/V0 complex, subunit C protein	14.2545	21.6076	6.88794	12.3588	1.01447	0.405222	0.16649	0
arahy.KX11UN	ZH16_S1_vs_ZH6_S1;ZH16_S2_vs_ZH6_S2;ZH16_S3_vs_ZH6_S3;ZH16_S4_vs_ZH6_S4	--	uncharacterized ATP-dependent helicase C29A10.10c-like isoform X2 [Glycine max]	4.09016	7.78616	3.8507	4.42203	0.297328	0.179474	0.11928	0
arahy.9TZZ10	ZH16_S1_vs_ZH6_S1;ZH16_S2_vs_ZH6_S2;ZH16_S3_vs_ZH6_S3;ZH16_S4_vs_ZH6_S4	--	Pentatricopeptide repeat (PPR) superfamily protein	0.515293	2.86708	1.16126	1.3552	0.0897991	0.0504852	0.0173178	0.0354721
arahy.Y9YBLC	ZH16_S1_vs_ZH6_S1;ZH16_S2_vs_ZH6_S2;ZH16_S3_vs_ZH6_S3;ZH16_S4_vs_ZH6_S4	--	molybdenum cofactor biosynthesis protein A	3.35475	4.37889	4.86591	5.81023	1.4593	1.73652	1.86244	1.30932
Novel03240	ZH16_S1_vs_ZH6_S1;ZH16_S2_vs_ZH6_S2;ZH16_S3_vs_ZH6_S3;ZH16_S4_vs_ZH6_S4	--	hypothetical protein VITISV_017741 [Vitis vinifera]	0.837151	1.51279	0.356746	0.933167	0.0206566	0.0107282	0	0
Novel02440	ZH16_S1_vs_ZH6_S1;ZH16_S2_vs_ZH6_S2;ZH16_S3_vs_ZH6_S3;ZH16_S4_vs_ZH6_S4	--	cysteine synthase, putative [Ricinus communis]>gi|223537996|gb|EEF39609.1| cysteine synthase, putative [Ricinus communis]	9.61137	63.2673	40.0545	53.7509	3.93706	17.7048	13.1606	7.88621
Novel01803	ZH16_S1_vs_ZH6_S1;ZH16_S2_vs_ZH6_S2;ZH16_S3_vs_ZH6_S3;ZH16_S4_vs_ZH6_S4	--	TIR-NBS-LRR type disease resistance protein [Arachis hypogaea]	6.18915	17.3159	6.70852	5.92531	0.896439	2.2847	1.00702	0.174547
arahy.9AU9EA	ZH16_S1_vs_ZH6_S1;ZH16_S2_vs_ZH6_S2;ZH16_S3_vs_ZH6_S3;ZH16_S4_vs_ZH6_S4	--	DEAD-box ATP-dependent RNA helicase-like protein	5.12933	7.19162	2.70888	3.61141	0.983273	1.31674	0.657752	0.231779
Novel02718	ZH16_S1_vs_ZH6_S1;ZH16_S2_vs_ZH6_S2;ZH16_S3_vs_ZH6_S3;ZH16_S4_vs_ZH6_S4	--	hypothetical protein VITISV_003778 [Vitis vinifera]	3.91833	8.08289	3.82797	4.38584	0.432647	0.780767	0.3232	0.34328
arahy.XVT01H	ZH16_S1_vs_ZH6_S1;ZH16_S2_vs_ZH6_S2;ZH16_S3_vs_ZH6_S3;ZH16_S4_vs_ZH6_S4	--	C2H2 type zinc-finger protein	1.4705	4.24897	1.74316	1.40405	0.327049	0.139855	0.123526	0
Novel00312	ZH16_S1_vs_ZH6_S1;ZH16_S2_vs_ZH6_S2;ZH16_S3_vs_ZH6_S3;ZH16_S4_vs_ZH6_S4	--	--	9.1813	8.01035	9.06726	16.6173	0.534736	1.30614	0.482699	0
Novel03659	ZH16_S1_vs_ZH6_S1;ZH16_S2_vs_ZH6_S2;ZH16_S3_vs_ZH6_S3;ZH16_S4_vs_ZH6_S4	--	PREDICTED: uncharacterized protein LOC104898452 [Beta vulgaris subsp. vulgaris]	1.4386	5.76276	1.68633	4.55246	0.00937659	0.0384866	0.0169273	0.0115574
Novel03248	ZH16_S1_vs_ZH6_S1;ZH16_S2_vs_ZH6_S2;ZH16_S3_vs_ZH6_S3;ZH16_S4_vs_ZH6_S4	--	ABC transporter-like family-protein [Medicago truncatula]	3.55898	4.92675	3.3646	3.94436	0.321165	0.470489	0.0790696	0
arahy.DRZ38W	ZH16_S1_vs_ZH6_S1;ZH16_S2_vs_ZH6_S2;ZH16_S3_vs_ZH6_S3;ZH16_S4_vs_ZH6_S4	--	protein serine/threonine phosphatases	16.9622	17.8615	13.0052	9.57976	1.37297	0.398464	0.16486	0.0214393
Novel04005	ZH16_S1_vs_ZH6_S1;ZH16_S2_vs_ZH6_S2;ZH16_S3_vs_ZH6_S3;ZH16_S4_vs_ZH6_S4	--	PREDICTED: probable galacturonosyltransferase 7 [Cicer arietinum]	3.96878	7.9289	8.83569	5.59126	0.545089	1.33723	0.422148	0
Novel00930	ZH16_S1_vs_ZH6_S1;ZH16_S2_vs_ZH6_S2;ZH16_S3_vs_ZH6_S3;ZH16_S4_vs_ZH6_S4	--	PREDICTED: 6-phosphogluconate dehydrogenase, decarboxylating 3-like isoform 1 [Glycine max]>gi|734357163|gb|KHN14455.1| 6-phosphogluconate dehydrogenase, decarboxylating [Glycine soja]	88.0171	31.1257	13.9637	5.79328	9.22344	1.12654	0.460471	0.0303014
arahy.7GG78Q	ZH16_S1_vs_ZH6_S1;ZH16_S2_vs_ZH6_S2;ZH16_S3_vs_ZH6_S3;ZH16_S4_vs_ZH6_S4	--	Pentatricopeptide repeat (PPR) superfamily protein	0.616397	1.83991	0.903745	0.902361	0.0442304	0.103589	0.039924	0
arahy.IGMF9F	ZH16_S1_vs_ZH6_S1;ZH16_S2_vs_ZH6_S2;ZH16_S3_vs_ZH6_S3;ZH16_S4_vs_ZH6_S4	--	zinc finger CCCH domain-containing protein 65-like [Glycine max]	11.6568	47.211	21.9416	28.5445	5.7108	14.4873	8.8531	7.11546
Novel03022	ZH16_S1_vs_ZH6_S1;ZH16_S2_vs_ZH6_S2;ZH16_S3_vs_ZH6_S3;ZH16_S4_vs_ZH6_S4	--	--	5.34648	2.82935	4.65463	4.30574	0.557799	0	0.0888592	0
Novel02777	ZH16_S1_vs_ZH6_S1;ZH16_S2_vs_ZH6_S2;ZH16_S3_vs_ZH6_S3;ZH16_S4_vs_ZH6_S4	--	conserved hypothetical protein [Ricinus communis]>gi|223539605|gb|EEF41191.1| conserved hypothetical protein [Ricinus communis]	2.5093	2.85461	4.25711	3.5502	0.188948	0	0.0852777	0
arahy.5J8FM2	ZH16_S1_vs_ZH6_S1;ZH16_S2_vs_ZH6_S2;ZH16_S3_vs_ZH6_S3;ZH16_S4_vs_ZH6_S4	--	Unknown protein	1.83856	5.57545	2.27886	3.35568	0.32246	0.271168	0	0.0418376
arahy.UQCT9E	ZH16_S1_vs_ZH6_S1;ZH16_S2_vs_ZH6_S2;ZH16_S3_vs_ZH6_S3;ZH16_S4_vs_ZH6_S4	--	putative nuclease HARBI1-like [Glycine max]	1.64908	3.75394	2.30219	2.03622	0.139659	0.840981	0.249008	0.156613
arahy.8I6L3A	ZH16_S1_vs_ZH6_S1;ZH16_S2_vs_ZH6_S2;ZH16_S3_vs_ZH6_S3;ZH16_S4_vs_ZH6_S4	--	alpha/beta-hydrolase superfamily protein	7.05178	3.94157	2.94831	2.53404	0.423406	0.19322	0.216889	0.0311753
Novel03712	ZH16_S1_vs_ZH6_S1;ZH16_S2_vs_ZH6_S2;ZH16_S3_vs_ZH6_S3;ZH16_S4_vs_ZH6_S4	--	--	4.56402	17.6222	4.65142	9.74443	0.478534	0.460205	0.318395	0
arahy.FAE047	ZH16_S1_vs_ZH6_S1;ZH16_S2_vs_ZH6_S2;ZH16_S3_vs_ZH6_S3;ZH16_S4_vs_ZH6_S4	--	Unknown protein	5.44456	6.75432	4.51035	4.8885	0.565645	0.0651507	0.0849304	0
arahy.555E9X	ZH16_S1_vs_ZH6_S1;ZH16_S2_vs_ZH6_S2;ZH16_S3_vs_ZH6_S3;ZH16_S4_vs_ZH6_S4	--	O-methyltransferase 1	1.91908	6.95714	2.23648	3.32603	0.0759977	0.052627	0.251533	0
arahy.7F80QJ	ZH16_S1_vs_ZH6_S1;ZH16_S2_vs_ZH6_S2;ZH16_S3_vs_ZH6_S3;ZH16_S4_vs_ZH6_S4	--	probable endo-1,4-beta-xylanase C-like [Glycine max]	1.44809	1.99905	1.63463	1.61892	0.546475	0.828195	0.17392	0.017199
Novel02758	ZH16_S1_vs_ZH6_S1;ZH16_S2_vs_ZH6_S2;ZH16_S3_vs_ZH6_S3;ZH16_S4_vs_ZH6_S4	--	--	11.3478	7.12653	6.26298	4.27656	1.19389	0	0	0
arahy.Y5E155	ZH16_S1_vs_ZH6_S1;ZH16_S2_vs_ZH6_S2;ZH16_S3_vs_ZH6_S3;ZH16_S4_vs_ZH6_S4	--	Metallopeptidase M24 family protein	5.83986	13.435	7.36269	13.3853	0.28839	0	0.423032	0
arahy.7JT764	ZH16_S1_vs_ZH6_S1;ZH16_S2_vs_ZH6_S2;ZH16_S3_vs_ZH6_S3;ZH16_S4_vs_ZH6_S4	--	Unknown protein	8.13581	11.8996	4.40389	6.08695	0.740684	0.861817	0.180448	0.890792
arahy.CT2P3Y	ZH16_S1_vs_ZH6_S1;ZH16_S2_vs_ZH6_S2;ZH16_S3_vs_ZH6_S3;ZH16_S4_vs_ZH6_S4	--	F-box-like protein	15.9366	12.0083	8.61345	6.44044	0.816959	0.196174	0.287959	0
arahy.N66XHA	ZH16_S1_vs_ZH6_S1;ZH16_S2_vs_ZH6_S2;ZH16_S3_vs_ZH6_S3;ZH16_S4_vs_ZH6_S4	--	Pentatricopeptide repeat (PPR) superfamily protein	3.00473	11.2633	4.11156	4.53708	0.801051	0.424204	0.0677154	0
arahy.BWT45P	ZH16_S1_vs_ZH6_S1;ZH16_S2_vs_ZH6_S2;ZH16_S3_vs_ZH6_S3;ZH16_S4_vs_ZH6_S4	--	membrane-anchored ubiquitin-fold protein 2	3.57584	3.20032	2.89298	2.62922	0.483059	0.109197	0.192124	0
arahy.0G84UH	ZH16_S1_vs_ZH6_S1;ZH16_S2_vs_ZH6_S2;ZH16_S3_vs_ZH6_S3;ZH16_S4_vs_ZH6_S4	--	unknown protein	10.7428	20.0312	11.8074	16.1632	0.669906	0.463897	0.453552	0
Novel02846	ZH16_S1_vs_ZH6_S1;ZH16_S2_vs_ZH6_S2;ZH16_S3_vs_ZH6_S3;ZH16_S4_vs_ZH6_S4	--	--	2.81165	3.15003	3.47732	3.38783	0.246339	0.256362	0	0
arahy.432JTE	ZH16_S1_vs_ZH6_S1;ZH16_S2_vs_ZH6_S2;ZH16_S3_vs_ZH6_S3;ZH16_S4_vs_ZH6_S4	--	Unknown protein	0.721294	4.4355	2.56186	2.12846	0.0851575	0.172455	0.0576549	0
Novel00293	ZH16_S1_vs_ZH6_S1;ZH16_S2_vs_ZH6_S2;ZH16_S3_vs_ZH6_S3;ZH16_S4_vs_ZH6_S4	--	--	5.96806	3.99363	5.18944	4.94666	0.511227	0.0745761	0	0
arahy.KS8FPJ	ZH16_S1_vs_ZH6_S1;ZH16_S2_vs_ZH6_S2;ZH16_S3_vs_ZH6_S3;ZH16_S4_vs_ZH6_S4	--	Protein phosphatase 2C family protein	2.41273	2.11067	0.980965	1.31219	0.225038	0	0.0677093	0
arahy.3BME1Z	ZH16_S1_vs_ZH6_S1;ZH16_S2_vs_ZH6_S2;ZH16_S3_vs_ZH6_S3;ZH16_S4_vs_ZH6_S4	--	exocyst subunit exo70 family protein E1	3.89718	5.13628	1.42199	0.851817	0.310053	0.0616927	0.0116503	0.0212099
arahy.7UMC4P	ZH16_S1_vs_ZH6_S1;ZH16_S2_vs_ZH6_S2;ZH16_S3_vs_ZH6_S3;ZH16_S4_vs_ZH6_S4	--	ATPase 9, plasma membrane-type-like [Glycine max]	2.63072	4.43971	2.99335	2.73557	0.162679	0.727853	0.808149	0.167769
Novel02833	ZH16_S1_vs_ZH6_S1;ZH16_S2_vs_ZH6_S2;ZH16_S3_vs_ZH6_S3;ZH16_S4_vs_ZH6_S4	--	--	1.29673	4.66957	3.60396	7.92178	0	0.114125	0.0568915	0
arahy.WE07RT	ZH16_S1_vs_ZH6_S1;ZH16_S2_vs_ZH6_S2;ZH16_S3_vs_ZH6_S3;ZH16_S4_vs_ZH6_S4	--	cysteine-rich receptor-like protein kinase 2-like isoform X1 [Glycine max]	7.84811	12.9945	8.02708	9.40043	1.09515	0.172646	0.231362	0
arahy.6U4YNS	ZH16_S1_vs_ZH6_S1;ZH16_S2_vs_ZH6_S2;ZH16_S3_vs_ZH6_S3;ZH16_S4_vs_ZH6_S4	--	Unknown protein	7.84638	94.6834	35.3586	49.9752	1.57192	4.66686	2.27335	0.44771
arahy.EQE0CJ	ZH16_S1_vs_ZH6_S1;ZH16_S2_vs_ZH6_S2;ZH16_S3_vs_ZH6_S3;ZH16_S4_vs_ZH6_S4	--	protein RIK-like isoform X1 [Glycine max]	6.78831	18.4862	8.12344	7.68783	0.786776	0.393435	0.271781	0.0517615
arahy.HRB54P	ZH16_S1_vs_ZH6_S1;ZH16_S2_vs_ZH6_S2;ZH16_S3_vs_ZH6_S3;ZH16_S4_vs_ZH6_S4	--	probable methyltransferase PMT2-like [Glycine max]	50.1877	17.1109	5.00778	2.70204	3.2025	0.413356	0.133348	0.020809
arahy.CNJ7NB	ZH16_S1_vs_ZH6_S1;ZH16_S2_vs_ZH6_S2;ZH16_S3_vs_ZH6_S3;ZH16_S4_vs_ZH6_S4	--	serine carboxypeptidase-like 25	16.1661	4.28404	2.96786	1.1986	0.301271	0.0963364	0.033153	0
Novel02231	ZH16_S1_vs_ZH6_S1;ZH16_S2_vs_ZH6_S2;ZH16_S3_vs_ZH6_S3;ZH16_S4_vs_ZH6_S4	--	PREDICTED: zinc finger BED domain-containing protein RICESLEEPER 2-like [Cicer arietinum]	2.02654	1.56509	0.807833	0.671512	0.206027	0.0370512	0	0
arahy.4977NQ	ZH16_S1_vs_ZH6_S1;ZH16_S2_vs_ZH6_S2;ZH16_S3_vs_ZH6_S3;ZH16_S4_vs_ZH6_S4	--	Histidine triad (HIT) family protein n=14 Tax=Lactobacillales RepID=D2BM46_LACLK	5.02829	10.619	7.59366	7.58959	0.698399	0.268037	0.108353	0.0538021
arahy.0N5Z96	ZH16_S1_vs_ZH6_S1;ZH16_S2_vs_ZH6_S2;ZH16_S3_vs_ZH6_S3;ZH16_S4_vs_ZH6_S4	--	clustered mitochondria protein-like isoform X2 [Glycine max]	3.45005	6.25605	3.35264	4.46057	0.0758384	0.0393875	0.102691	0
arahy.D2PEHJ	ZH16_S1_vs_ZH6_S1;ZH16_S2_vs_ZH6_S2;ZH16_S3_vs_ZH6_S3;ZH16_S4_vs_ZH6_S4	--	poly(ADP-ribose) glycohydrolase 2	22.8891	45.5626	33.6419	34.5787	8.79373	12.1293	11.3469	9.70024
arahy.0J6LH7	ZH16_S1_vs_ZH6_S1;ZH16_S2_vs_ZH6_S2;ZH16_S3_vs_ZH6_S3;ZH16_S4_vs_ZH6_S4	--	Saccharopine dehydrogenase	4.12977	9.34047	15.3775	13.1783	0.810705	0.610088	0.372504	0.11968
arahy.5S904D	ZH16_S1_vs_ZH6_S1;ZH16_S2_vs_ZH6_S2;ZH16_S3_vs_ZH6_S3;ZH16_S4_vs_ZH6_S4	--	uncharacterized protein LOC100800896 isoform X2 [Glycine max]	13.9657	17.3604	6.19442	7.02373	1.32415	1.17485	0.368773	0
arahy.E901NL	ZH16_S1_vs_ZH6_S1;ZH16_S2_vs_ZH6_S2;ZH16_S3_vs_ZH6_S3;ZH16_S4_vs_ZH6_S4	--	mRNA-decapping enzyme-like protein	8.28335	35.2404	7.13908	16.2422	0.845572	0.451047	0	0.0823425
Novel04133	ZH16_S1_vs_ZH6_S1;ZH16_S2_vs_ZH6_S2;ZH16_S3_vs_ZH6_S3;ZH16_S4_vs_ZH6_S4	--	putative gag protein [Coffea canephora]	2.48982	9.57439	2.79131	5.57841	0.257687	0.237914	0.10002	0.0343672
arahy.WKA37H	ZH16_S1_vs_ZH6_S1;ZH16_S2_vs_ZH6_S2;ZH16_S3_vs_ZH6_S3;ZH16_S4_vs_ZH6_S4	--	pfkB-like carbohydrate kinase family protein	2.45775	13.7463	7.65333	12.9956	0.424495	0	0.1437	0
arahy.H8YVTX	ZH16_S1_vs_ZH6_S1;ZH16_S2_vs_ZH6_S2;ZH16_S3_vs_ZH6_S3;ZH16_S4_vs_ZH6_S4	--	Pentatricopeptide repeat (PPR) superfamily protein	2.21513	3.94236	2.47253	2.07724	0.234068	0.0724853	0.0692226	0
arahy.AXGL4F	ZH16_S1_vs_ZH6_S1;ZH16_S2_vs_ZH6_S2;ZH16_S3_vs_ZH6_S3;ZH16_S4_vs_ZH6_S4	--	protein HAPLESS 2-like [Glycine max]	5.63713	30.1488	11.0714	19.8183	1.14546	0.559602	0.385009	0
arahy.KM01EC	ZH16_S1_vs_ZH6_S1;ZH16_S2_vs_ZH6_S2;ZH16_S3_vs_ZH6_S3;ZH16_S4_vs_ZH6_S4	--	aldo-keto reductase family 4 member C9-like isoform X3 [Glycine max]	8.14717	20.306	7.55671	8.85949	0.861435	0.324267	0.458537	0.115963
arahy.VY3GX3	ZH16_S1_vs_ZH6_S1;ZH16_S2_vs_ZH6_S2;ZH16_S3_vs_ZH6_S3;ZH16_S4_vs_ZH6_S4	--	E3 ubiquitin-protein ligase	9.15488	12.2535	4.35636	6.65981	0.45564	0.397296	0.131267	0.0159323
arahy.PDIL34	ZH16_S1_vs_ZH6_S1;ZH16_S2_vs_ZH6_S2;ZH16_S3_vs_ZH6_S3;ZH16_S4_vs_ZH6_S4	B3	Unknown protein	1.92173	34.1234	9.45344	20.8738	0.172089	1.49744	0.464157	0.0618318
Novel03139	ZH16_S1_vs_ZH6_S1;ZH16_S2_vs_ZH6_S2;ZH16_S3_vs_ZH6_S3;ZH16_S4_vs_ZH6_S4	--	PREDICTED: probable quinone oxidoreductase [Erythranthe guttatus]>gi|604300361|gb|EYU20204.1| hypothetical protein MIMGU_mgv1a011056mg [Erythranthe guttata]	3.39342	32.839	5.0567	25.6106	0.274808	0.343261	0.119254	0
Novel00013	ZH16_S1_vs_ZH6_S1;ZH16_S2_vs_ZH6_S2;ZH16_S3_vs_ZH6_S3;ZH16_S4_vs_ZH6_S4	--	hypothetical protein ARAX_ADH51I17-83F22-001 [Arachis duranensis]	2.90727	12.4728	6.26213	8.85083	0.280663	0.0203002	0.123489	0.116214
arahy.WHES61	ZH16_S1_vs_ZH6_S1;ZH16_S2_vs_ZH6_S2;ZH16_S3_vs_ZH6_S3;ZH16_S4_vs_ZH6_S4	--	Rho GTPase	9.28671	16.774	17.8763	22.8023	2.18961	2.28947	3.45251	0.819722
Novel04925	ZH16_S1_vs_ZH6_S1;ZH16_S2_vs_ZH6_S2;ZH16_S3_vs_ZH6_S3;ZH16_S4_vs_ZH6_S4	--	PREDICTED: uncharacterized protein LOC101515413 isoform X2 [Cicer arietinum]	4.49796	11.2036	7.76473	6.01266	0.746706	0.259167	0.0728654	0
arahy.C8BV8A	ZH16_S1_vs_ZH6_S1;ZH16_S2_vs_ZH6_S2;ZH16_S3_vs_ZH6_S3;ZH16_S4_vs_ZH6_S4	--	C-terminal domain phosphatase-like 3	0.915738	4.45675	1.73634	1.71489	0.248202	0.323397	0.110065	0.224618
Novel00278	ZH16_S1_vs_ZH6_S1;ZH16_S2_vs_ZH6_S2;ZH16_S3_vs_ZH6_S3;ZH16_S4_vs_ZH6_S4	--	--	4.00405	3.55427	8.31891	9.01361	0.165409	0.187627	0.0895905	0
Novel04508	ZH16_S1_vs_ZH6_S1;ZH16_S2_vs_ZH6_S2;ZH16_S3_vs_ZH6_S3;ZH16_S4_vs_ZH6_S4	--	--	3.44787	3.66855	3.84578	2.91394	0.396118	0.296466	0	0
Novel03719	ZH16_S1_vs_ZH6_S1;ZH16_S2_vs_ZH6_S2;ZH16_S3_vs_ZH6_S3;ZH16_S4_vs_ZH6_S4	--	hypothetical protein PHAVU_007G133700g [Phaseolus vulgaris]>gi|561017350|gb|ESW16154.1| hypothetical protein PHAVU_007G133700g [Phaseolus vulgaris]	8.41886	7.90077	4.53904	3.8864	1.0538	0.588955	0.176781	0.068969
arahy.N4CHUD	ZH16_S1_vs_ZH6_S1;ZH16_S2_vs_ZH6_S2;ZH16_S3_vs_ZH6_S3;ZH16_S4_vs_ZH6_S4	--	uncharacterized protein At1g04910-like [Glycine max]	3.21537	7.32211	6.49371	4.68498	0.667097	0.281109	0.0910105	0
arahy.ZD4MPF	ZH16_S1_vs_ZH6_S1;ZH16_S2_vs_ZH6_S2;ZH16_S3_vs_ZH6_S3;ZH16_S4_vs_ZH6_S4	--	GDSL-like Lipase/Acylhydrolase superfamily protein	3.4896	23.1435	10.4114	12.1466	0.954677	0.640183	0.594173	0.351496
arahy.GU6ASX	ZH16_S1_vs_ZH6_S1;ZH16_S2_vs_ZH6_S2;ZH16_S3_vs_ZH6_S3;ZH16_S4_vs_ZH6_S4	--	COP9 signalosome complex subunit 1	2.94543	15.9147	7.61631	4.49359	0.53243	0.718506	0.339825	0
arahy.P7B6WW	ZH16_S1_vs_ZH6_S1;ZH16_S2_vs_ZH6_S2;ZH16_S3_vs_ZH6_S3;ZH16_S4_vs_ZH6_S4	--	histone-lysine N-methyltransferase ASHH2-like isoform X1 [Glycine max]	7.59902	7.4475	4.42904	3.64062	1.35398	0.607193	0.757135	0.563885
Novel01068	ZH16_S1_vs_ZH6_S1;ZH16_S2_vs_ZH6_S2;ZH16_S3_vs_ZH6_S3;ZH16_S4_vs_ZH6_S4	--	unnamed protein product [Vitis vinifera]	7.4469	15.2686	10.8179	12.3361	0.905243	0.34951	0.146666	0
Novel00239	ZH16_S1_vs_ZH6_S1;ZH16_S2_vs_ZH6_S2;ZH16_S3_vs_ZH6_S3;ZH16_S4_vs_ZH6_S4	--	--	3.46405	2.6537	2.9558	2.70059	0.372801	0.412828	0.0405661	0
arahy.G91HIM	ZH16_S1_vs_ZH6_S1;ZH16_S2_vs_ZH6_S2;ZH16_S3_vs_ZH6_S3;ZH16_S4_vs_ZH6_S4	--	Unknown protein	4.14956	12.5353	6.83266	7.46495	0.368997	0.390576	0.142757	0
Novel03259	ZH16_S1_vs_ZH6_S1;ZH16_S2_vs_ZH6_S2;ZH16_S3_vs_ZH6_S3;ZH16_S4_vs_ZH6_S4	--	--	1.15905	1.55307	1.62516	2.08079	0.0971375	0.0848376	0.0757247	0
Novel00199	ZH16_S1_vs_ZH6_S1;ZH16_S2_vs_ZH6_S2;ZH16_S3_vs_ZH6_S3;ZH16_S4_vs_ZH6_S4	--	PREDICTED: uncharacterized protein LOC104109606 [Nicotiana tomentosiformis]	5.31249	13.8378	7.12865	10.0283	0.493782	2.20159	0.384359	0.0498262
Novel03515	ZH16_S1_vs_ZH6_S1;ZH16_S2_vs_ZH6_S2;ZH16_S3_vs_ZH6_S3;ZH16_S4_vs_ZH6_S4	--	PREDICTED: uncharacterized protein LOC104237250 [Nicotiana sylvestris]	1.90559	11.3024	4.85976	9.41673	0.245753	0.104374	0.140492	0.0403881
arahy.P7LCTL	ZH16_S1_vs_ZH6_S1;ZH16_S2_vs_ZH6_S2;ZH16_S3_vs_ZH6_S3;ZH16_S4_vs_ZH6_S4	--	Protein kinase superfamily protein	10.9462	13.2738	5.89353	10.8716	0.570942	1.00707	0.711207	0.0562986
Novel04902	ZH16_S1_vs_ZH6_S1;ZH16_S2_vs_ZH6_S2;ZH16_S3_vs_ZH6_S3;ZH16_S4_vs_ZH6_S4	--	unknown [Lotus japonicus]	3.14285	9.04111	7.00055	8.54319	0.209011	0.775804	0.362821	0.0396342
arahy.8X9BUY	ZH16_S1_vs_ZH6_S1;ZH16_S2_vs_ZH6_S2;ZH16_S3_vs_ZH6_S3;ZH16_S4_vs_ZH6_S4	--	metallothionein 2A	3130.8	3190.2	6595.06	10617.4	22.8691	260.15	61.0869	6.05766
Novel03566	ZH16_S1_vs_ZH6_S1;ZH16_S2_vs_ZH6_S2;ZH16_S3_vs_ZH6_S3;ZH16_S4_vs_ZH6_S4	--	hypothetical protein PHAVU_007G253700g [Phaseolus vulgaris]>gi|561018805|gb|ESW17609.1| hypothetical protein PHAVU_007G253700g [Phaseolus vulgaris]	7.30327	12.8362	4.42952	7.26038	0.231336	0.641263	0.225798	0.554888
arahy.2Q0DPQ	ZH16_S1_vs_ZH6_S1;ZH16_S2_vs_ZH6_S2;ZH16_S3_vs_ZH6_S3;ZH16_S4_vs_ZH6_S4	--	germin-like protein 10	3.4987	2.52695	2.77094	1.94397	0.434247	0.0514097	0.105165	0.0261095
arahy.1R75EY	ZH16_S1_vs_ZH6_S1;ZH16_S2_vs_ZH6_S2;ZH16_S3_vs_ZH6_S3;ZH16_S4_vs_ZH6_S4	--	ninja-family protein mc410	12.932	21.7312	21.075	7.15162	1.69914	0.636662	0.52023	0.119415
Novel04911	ZH16_S1_vs_ZH6_S1;ZH16_S2_vs_ZH6_S2;ZH16_S3_vs_ZH6_S3;ZH16_S4_vs_ZH6_S4	--	--	2.47255	2.70386	3.21504	3.65962	0.145972	0.114541	0.0705918	0
arahy.KBYC2D	ZH16_S1_vs_ZH6_S1;ZH16_S2_vs_ZH6_S2;ZH16_S3_vs_ZH6_S3;ZH16_S4_vs_ZH6_S4	--	protein FLX-like 3-like isoform X1 [Glycine max]	6.62638	4.612	4.27865	2.60173	0.93941	0.352955	0.191568	0.0578469
Novel01703	ZH16_S1_vs_ZH6_S1;ZH16_S2_vs_ZH6_S2;ZH16_S3_vs_ZH6_S3;ZH16_S4_vs_ZH6_S4	--	PREDICTED: L-type lectin-domain containing receptor kinase IX.1-like [Gossypium raimondii]>gi|763776912|gb|KJB44035.1| hypothetical protein B456_007G231300 [Gossypium raimondii]	1.93609	9.75816	4.35836	6.7256	0.137249	0.0861508	0.0530988	0
arahy.ITS9LF	ZH16_S1_vs_ZH6_S1;ZH16_S2_vs_ZH6_S2;ZH16_S3_vs_ZH6_S3;ZH16_S4_vs_ZH6_S4	--	Oxysterol-binding family protein	38.3639	4.12328	2.60231	2.41655	4.14191	0.188769	0.0279467	0.0254391
Novel00413	ZH16_S1_vs_ZH6_S1;ZH16_S2_vs_ZH6_S2;ZH16_S3_vs_ZH6_S3;ZH16_S4_vs_ZH6_S4	--	unknown [Medicago truncatula]	2.0811	10.4951	4.14347	4.60399	0.183746	0.113453	0.0829352	0.0377468
Novel03250	ZH16_S1_vs_ZH6_S1;ZH16_S2_vs_ZH6_S2;ZH16_S3_vs_ZH6_S3;ZH16_S4_vs_ZH6_S4	--	tyrosine protein kinase, partial [Populus tremula]>gi|168481758|gb|ACA25056.1| tyrosine protein kinase, partial [Populus tremula]>gi|168481760|gb|ACA25057.1| tyrosine protein kinase, partial [Populus tremula]>gi|168481762|gb|ACA25058.1| tyrosine protein kinase, partial [Populus tremula]>gi|168481764|gb|ACA25059.1| tyrosine protein kinase, partial [Populus tremula]>gi|168481766|gb|ACA25060.1| tyro…	1.6352	14.6345	4.04524	9.86225	0.305273	0.125575	0.227335	0
arahy.YA99EJ	ZH16_S1_vs_ZH6_S1;ZH16_S2_vs_ZH6_S2;ZH16_S3_vs_ZH6_S3;ZH16_S4_vs_ZH6_S4	--	uncharacterized protein LOC100788724 [Glycine max]	10.6156	7.21631	4.51235	3.28821	0.892112	0.249672	0.26556	0.0505766
Novel02721	ZH16_S1_vs_ZH6_S1;ZH16_S2_vs_ZH6_S2;ZH16_S3_vs_ZH6_S3;ZH16_S4_vs_ZH6_S4	--	PREDICTED: 2-methylene-furan-3-one reductase-like [Malus domestica]	4.86198	9.00985	5.1069	5.65959	0.202539	0.271035	0.0979477	0
Novel03586	ZH16_S1_vs_ZH6_S1;ZH16_S2_vs_ZH6_S2;ZH16_S3_vs_ZH6_S3;ZH16_S4_vs_ZH6_S4	--	PREDICTED: uncharacterized protein LOC100776131 isoform X3 [Glycine max]	0.51538	5.37641	0.865585	1.82919	0.0745804	0.0211277	0.0550842	0.0167139
Novel00934	ZH16_S1_vs_ZH6_S1;ZH16_S2_vs_ZH6_S2;ZH16_S3_vs_ZH6_S3;ZH16_S4_vs_ZH6_S4	--	hypothetical protein PRUPE_ppa006743mg [Prunus persica]>gi|462396470|gb|EMJ02269.1| hypothetical protein PRUPE_ppa006743mg [Prunus persica]	1.13008	7.03818	3.13222	3.14769	0.177629	0.087047	0.0493338	0
arahy.TR1S4A	ZH16_S1_vs_ZH6_S1;ZH16_S2_vs_ZH6_S2;ZH16_S3_vs_ZH6_S3;ZH16_S4_vs_ZH6_S4	--	Protein kinase superfamily protein	8.02816	28.3167	8.09127	10.9037	0.828955	0.0934731	0.231942	0
Novel01687	ZH16_S1_vs_ZH6_S1;ZH16_S2_vs_ZH6_S2;ZH16_S3_vs_ZH6_S3;ZH16_S4_vs_ZH6_S4	--	hypothetical protein POPTR_1595s00200g, partial [Populus trichocarpa]>gi|550305546|gb|ERP46094.1| hypothetical protein POPTR_1595s00200g, partial [Populus trichocarpa]	2.04501	7.22479	2.79759	2.54117	0.296516	0.209193	0	0
arahy.YST1YA	ZH16_S1_vs_ZH6_S1;ZH16_S2_vs_ZH6_S2;ZH16_S3_vs_ZH6_S3;ZH16_S4_vs_ZH6_S4	--	60S ribosomal protein L38-like [Glycine max]	10.258	61.2121	25.1312	22.1411	1.91735	1.14804	0.388317	0
arahy.J64BKK	ZH16_S1_vs_ZH6_S1;ZH16_S2_vs_ZH6_S2;ZH16_S3_vs_ZH6_S3;ZH16_S4_vs_ZH6_S4	--	DEAD-box ATP-dependent RNA helicase-like protein	3.73018	12.4159	4.959	7.77206	0.543691	0.262933	0.0788786	0
Novel01477	ZH16_S1_vs_ZH6_S1;ZH16_S2_vs_ZH6_S2;ZH16_S3_vs_ZH6_S3;ZH16_S4_vs_ZH6_S4	--	--	1.03263	7.95656	6.71719	6.68456	0.122109	0	0.170849	0.0301019
Novel00933	ZH16_S1_vs_ZH6_S1;ZH16_S2_vs_ZH6_S2;ZH16_S3_vs_ZH6_S3;ZH16_S4_vs_ZH6_S4	--	MADS1 [Castanea mollissima]	0.678887	3.92135	0.744712	0.475536	0.0337413	0.0283019	0	0
Novel02299	ZH16_S1_vs_ZH6_S1;ZH16_S2_vs_ZH6_S2;ZH16_S3_vs_ZH6_S3;ZH16_S4_vs_ZH6_S4	--	PREDICTED: uncharacterized protein LOC101491436 [Cicer arietinum]	1.61687	5.46433	1.55234	1.37919	0.127417	0.119153	0	0
arahy.US91MI	ZH16_S1_vs_ZH6_S1;ZH16_S2_vs_ZH6_S2;ZH16_S3_vs_ZH6_S3;ZH16_S4_vs_ZH6_S4	--	protein notum homolog isoform X1 [Glycine max]	8.23929	20.7198	3.80211	5.66914	0.494009	0.296275	0.114861	0
arahy.VQ0B27	ZH16_S1_vs_ZH6_S1;ZH16_S2_vs_ZH6_S2;ZH16_S3_vs_ZH6_S3;ZH16_S4_vs_ZH6_S4	--	nitrate transporter 1.7	2.82828	2.65277	3.82662	2.56192	0.878689	0.574648	0.394178	0.151083
arahy.LCY77V	ZH16_S1_vs_ZH6_S1;ZH16_S2_vs_ZH6_S2;ZH16_S3_vs_ZH6_S3;ZH16_S4_vs_ZH6_S4	--	Unknown protein	18.5806	23.1338	17.8983	25.74	0.68835	0.274773	0.60876	0
Novel05085	ZH16_S1_vs_ZH6_S1;ZH16_S2_vs_ZH6_S2;ZH16_S3_vs_ZH6_S3;ZH16_S4_vs_ZH6_S4	--	hypothetical protein VITISV_017741 [Vitis vinifera]	35.598	12.7294	5.01981	8.97358	0.691874	0.00631948	0.123565	0
Novel05067	ZH16_S1_vs_ZH6_S1;ZH16_S2_vs_ZH6_S2;ZH16_S3_vs_ZH6_S3;ZH16_S4_vs_ZH6_S4	--	PREDICTED: regulator of nonsense transcripts UPF3-like isoform X1 [Glycine max]>gi|571493781|ref|XP_006592655.1| PREDICTED: regulator of nonsense transcripts UPF3-like isoform X2 [Glycine max]>gi|734400930|gb|KHN31598.1| Regulator of nonsense transcripts 3A [Glycine soja]	1.77203	10.8729	6.08108	7.63446	0.387935	0.164933	0.102135	0
Novel04023	ZH16_S1_vs_ZH6_S1;ZH16_S2_vs_ZH6_S2;ZH16_S3_vs_ZH6_S3;ZH16_S4_vs_ZH6_S4	--	hypothetical protein 31.t00030 [Brassica oleracea]	3.00691	3.43776	6.38661	8.83294	0.577524	0.447423	0.512314	0.0490927
Novel03568	ZH16_S1_vs_ZH6_S1;ZH16_S2_vs_ZH6_S2;ZH16_S3_vs_ZH6_S3;ZH16_S4_vs_ZH6_S4	--	--	3.7751	4.29369	7.64957	7.19998	0.465212	0.0906582	0.0251973	0.167381
Novel02157	ZH16_S1_vs_ZH6_S1;ZH16_S2_vs_ZH6_S2;ZH16_S3_vs_ZH6_S3;ZH16_S4_vs_ZH6_S4	--	PREDICTED: uncharacterized protein LOC104885415 [Beta vulgaris subsp. vulgaris]	7.1481	14.5723	4.77356	7.4646	0.23657	0.0618568	0.100376	0.0203044
arahy.Q4NL7Y	ZH16_S1_vs_ZH6_S1;ZH16_S2_vs_ZH6_S2;ZH16_S3_vs_ZH6_S3;ZH16_S4_vs_ZH6_S4	--	histidine kinase 1	2.1308	8.34992	3.87729	6.12815	0.627593	1.43188	0.57638	0.402525
arahy.UE6VDT	ZH16_S1_vs_ZH6_S1;ZH16_S2_vs_ZH6_S2;ZH16_S3_vs_ZH6_S3;ZH16_S4_vs_ZH6_S4	--	serine carboxypeptidase-like 45	3.04046	5.88506	4.34887	4.10727	0.529117	0.270846	0.150835	0
arahy.2AJD6H	ZH16_S1_vs_ZH6_S1;ZH16_S2_vs_ZH6_S2;ZH16_S3_vs_ZH6_S3;ZH16_S4_vs_ZH6_S4	--	probable calcium-binding protein CML20 [Glycine max]	4.95761	10.4923	5.14819	5.35287	0.385523	0.242948	0.174009	0
Novel01328	ZH16_S1_vs_ZH6_S1;ZH16_S2_vs_ZH6_S2;ZH16_S3_vs_ZH6_S3;ZH16_S4_vs_ZH6_S4	--	--	1.43976	3.27333	2.53397	2.4214	0.216292	0.108365	0.117961	0.0222165
Novel03452	ZH16_S1_vs_ZH6_S1;ZH16_S2_vs_ZH6_S2;ZH16_S3_vs_ZH6_S3;ZH16_S4_vs_ZH6_S4	--	PREDICTED: uncharacterized protein LOC101254990 [Solanum lycopersicum]	0.691189	3.12297	0.789601	1.33977	0.0814934	0.0069417	0.0147131	0
arahy.KRT5WL	ZH16_S1_vs_ZH6_S1;ZH16_S2_vs_ZH6_S2;ZH16_S3_vs_ZH6_S3;ZH16_S4_vs_ZH6_S4	--	replication factor-A carboxy-terminal domain protein	2.65692	29.8358	6.91311	12.9665	0.0485732	0.143112	0.0986579	0
Novel03263	ZH16_S1_vs_ZH6_S1;ZH16_S2_vs_ZH6_S2;ZH16_S3_vs_ZH6_S3;ZH16_S4_vs_ZH6_S4	--	6b-interacting protein 2 [Nicotiana tabacum]	1.18764	4.11754	1.28681	2.39674	0.0870243	0.0892986	0.0540054	0
arahy.7G7S7J	ZH16_S1_vs_ZH6_S1;ZH16_S2_vs_ZH6_S2;ZH16_S3_vs_ZH6_S3;ZH16_S4_vs_ZH6_S4	--	replication factor C subunit 3	5.40395	10.3545	4.06262	3.1803	0.530333	0.129762	0.147085	0.0916072
Novel03848	ZH16_S1_vs_ZH6_S1;ZH16_S2_vs_ZH6_S2;ZH16_S3_vs_ZH6_S3;ZH16_S4_vs_ZH6_S4	--	--	0.98176	4.26842	0.917814	1.43427	0.12906	0	0.0873728	0
arahy.F5EPY8	ZH16_S1_vs_ZH6_S1;ZH16_S2_vs_ZH6_S2;ZH16_S3_vs_ZH6_S3;ZH16_S4_vs_ZH6_S4	--	maestro heat-like repeat-containing protein family member 1-like isoform X3 [Glycine max]	2.91297	11.4903	3.92526	6.3765	0.280426	0.135861	0.0562545	0
Novel03426	ZH16_S1_vs_ZH6_S1;ZH16_S2_vs_ZH6_S2;ZH16_S3_vs_ZH6_S3;ZH16_S4_vs_ZH6_S4	--	--	2.17234	7.38468	2.73552	6.23724	0.125976	0.199407	0.106614	0
Novel00561	ZH16_S1_vs_ZH6_S1;ZH16_S2_vs_ZH6_S2;ZH16_S3_vs_ZH6_S3;ZH16_S4_vs_ZH6_S4	--	PREDICTED: uncharacterized protein LOC104898452 [Beta vulgaris subsp. vulgaris]	1.35131	7.37298	2.60107	3.28847	0.0946097	0.139926	0.346073	0.0198967
arahy.QNIY5E	ZH16_S1_vs_ZH6_S1;ZH16_S2_vs_ZH6_S2;ZH16_S3_vs_ZH6_S3;ZH16_S4_vs_ZH6_S4	--	PI-PLC X domain-containing protein At5g67130-like [Glycine max]	1.37873	0.604399	1.77035	2.92697	0.0341353	0.0177285	0.0231109	0
arahy.F0YWKB	ZH16_S1_vs_ZH6_S1;ZH16_S2_vs_ZH6_S2;ZH16_S3_vs_ZH6_S3;ZH16_S4_vs_ZH6_S4	--	long chain acyl-CoA synthetase 2-like [Glycine max]	13.562	45.3882	17.0312	20.981	3.46084	4.49155	3.25317	3.65772
Novel04365	ZH16_S1_vs_ZH6_S1;ZH16_S2_vs_ZH6_S2;ZH16_S3_vs_ZH6_S3;ZH16_S4_vs_ZH6_S4	--	--	1.56266	4.70425	1.23684	1.49744	0.154077	0.0598337	0.0184392	0
arahy.90K79T	ZH16_S1_vs_ZH6_S1;ZH16_S2_vs_ZH6_S2;ZH16_S3_vs_ZH6_S3;ZH16_S4_vs_ZH6_S4	--	DSBA oxidoreductase family protein	4.80174	2.79959	2.30935	1.84508	0.467077	0.0961183	0.0440401	0
arahy.M0CFGP	ZH16_S1_vs_ZH6_S1;ZH16_S2_vs_ZH6_S2;ZH16_S3_vs_ZH6_S3;ZH16_S4_vs_ZH6_S4	--	Unknown protein	13.5018	6.44665	4.97443	5.46037	0.483594	0	0	0.051832
arahy.N1J2JS	ZH16_S1_vs_ZH6_S1;ZH16_S2_vs_ZH6_S2;ZH16_S3_vs_ZH6_S3;ZH16_S4_vs_ZH6_S4	--	ATPase family AAA domain-containing protein 1-A-like [Glycine max]	3.94278	9.23757	3.95101	6.32589	0.445391	0.177618	0.135987	0.0322929
Novel03429	ZH16_S1_vs_ZH6_S1;ZH16_S2_vs_ZH6_S2;ZH16_S3_vs_ZH6_S3;ZH16_S4_vs_ZH6_S4	--	Villin 2 isoform 4, partial [Theobroma cacao]>gi|508717329|gb|EOY09226.1| Villin 2 isoform 4, partial [Theobroma cacao]	5.01774	28.4998	8.09248	15.7769	0.64378	0.983507	0.572276	0
Novel02582	ZH16_S1_vs_ZH6_S1;ZH16_S2_vs_ZH6_S2;ZH16_S3_vs_ZH6_S3;ZH16_S4_vs_ZH6_S4	--	--	10.503	8.87537	9.66953	8.16978	0.725994	0.399187	0.0307204	0
arahy.UEZ3ZF	ZH16_S1_vs_ZH6_S1;ZH16_S2_vs_ZH6_S2;ZH16_S3_vs_ZH6_S3;ZH16_S4_vs_ZH6_S4	--	Pentatricopeptide repeat (PPR) superfamily protein	1.7282	6.68345	2.7664	3.52472	0.181056	0.36884	0.073549	0
arahy.GJD59M	ZH16_S1_vs_ZH6_S1;ZH16_S2_vs_ZH6_S2;ZH16_S3_vs_ZH6_S3;ZH16_S4_vs_ZH6_S4	--	methyl esterase 11	50.8322	8.20114	9.23396	5.61629	19.1219	3.72645	2.88461	1.56507
arahy.Z7XC1R	ZH16_S1_vs_ZH6_S1;ZH16_S2_vs_ZH6_S2;ZH16_S3_vs_ZH6_S3;ZH16_S4_vs_ZH6_S4	--	Unknown protein	2.57034	8.36417	3.41405	4.08082	0.393864	0.65796	0.157257	0.0746875
arahy.5E9M75	ZH16_S1_vs_ZH6_S1;ZH16_S2_vs_ZH6_S2;ZH16_S3_vs_ZH6_S3;ZH16_S4_vs_ZH6_S4	--	conserved peptide upstream open reading frame 9	144.022	4.5628	2.49321	1.98311	2.92932	0.275779	0.0544716	0
Novel03569	ZH16_S1_vs_ZH6_S1;ZH16_S2_vs_ZH6_S2;ZH16_S3_vs_ZH6_S3;ZH16_S4_vs_ZH6_S4	--	--	2.05593	0.502975	4.44725	5.18711	0.0995731	0	0	0.0895648
Novel02166	ZH16_S1_vs_ZH6_S1;ZH16_S2_vs_ZH6_S2;ZH16_S3_vs_ZH6_S3;ZH16_S4_vs_ZH6_S4	--	--	3.77365	4.79382	7.16278	6.78702	0.243155	0.074166	0.0299319	0
Novel04394	ZH16_S1_vs_ZH6_S1;ZH16_S2_vs_ZH6_S2;ZH16_S3_vs_ZH6_S3;ZH16_S4_vs_ZH6_S4	--	PREDICTED: uncharacterized protein LOC100797980 [Glycine max]	1.41301	5.6104	1.91117	1.80041	0.49942	0.963823	0.368867	0.164743
arahy.CH87W6	ZH16_S1_vs_ZH6_S1;ZH16_S2_vs_ZH6_S2;ZH16_S3_vs_ZH6_S3;ZH16_S4_vs_ZH6_S4	--	ubiquitin C-terminal hydrolase 3	3.45971	25.9832	9.86077	12.9359	0.763484	0.689713	0.934552	0
Novel01624	ZH16_S1_vs_ZH6_S1;ZH16_S2_vs_ZH6_S2;ZH16_S3_vs_ZH6_S3;ZH16_S4_vs_ZH6_S4	--	PREDICTED: preprotein translocase subunit SCY1, chloroplastic-like isoform X2 [Glycine max]	5.90181	32.361	8.49035	11.9143	0.436109	0.0538501	0.0948666	0.0411
arahy.LN40BG	ZH16_S1_vs_ZH6_S1;ZH16_S2_vs_ZH6_S2;ZH16_S3_vs_ZH6_S3;ZH16_S4_vs_ZH6_S4	--	beta glucosidase 16	2.80831	4.93738	2.43809	1.98928	0.486773	0.280571	0.119485	0.0594597
arahy.E99XLH	ZH16_S1_vs_ZH6_S1;ZH16_S2_vs_ZH6_S2;ZH16_S3_vs_ZH6_S3;ZH16_S4_vs_ZH6_S4	--	pantothenate kinase 2	6.55304	36.7519	7.07704	24.9247	0.477032	1.2047	0.179414	0.0326655
Novel01050	ZH16_S1_vs_ZH6_S1;ZH16_S2_vs_ZH6_S2;ZH16_S3_vs_ZH6_S3;ZH16_S4_vs_ZH6_S4	--	Malonyl-CoA isoflavone 7-O-glucoside-6'-O-malonyltransferase [Medicago truncatula]>gi|355496482|gb|AES77685.1| anthocyanin 5-aromatic acyltransferase [Medicago truncatula]	5.14192	1.78432	1.31369	1.47604	0.526108	0.0282258	0.0735904	0
arahy.A2BAJG	ZH16_S1_vs_ZH6_S1;ZH16_S2_vs_ZH6_S2;ZH16_S3_vs_ZH6_S3;ZH16_S4_vs_ZH6_S4	--	uncharacterized protein LOC100809644 isoform X3 [Glycine max]	3.68938	21.6501	18.701	17.1106	0.404641	0.164049	0.182632	0
arahy.YPLH9H	ZH16_S1_vs_ZH6_S1;ZH16_S2_vs_ZH6_S2;ZH16_S3_vs_ZH6_S3;ZH16_S4_vs_ZH6_S4	--	N2,N2-dimethylguanosine tRNA methyltransferase	2.72211	4.45175	2.53143	1.87862	0.645418	0.149737	0.0852377	0.0232777
arahy.L1DWHY	ZH16_S1_vs_ZH6_S1;ZH16_S2_vs_ZH6_S2;ZH16_S3_vs_ZH6_S3;ZH16_S4_vs_ZH6_S4	--	dentin sialophosphoprotein-like isoform X2 [Glycine max]	0.435751	0.369351	0.293856	0.452084	0.00692012	0.00884196	0	0
arahy.LP3G76	ZH16_S1_vs_ZH6_S1;ZH16_S2_vs_ZH6_S2;ZH16_S3_vs_ZH6_S3;ZH16_S4_vs_ZH6_S4	--	plant nuclear matrix protein	2.89698	10.0389	2.71291	5.2191	0.3203	0.943409	0.443626	0.820582
Novel03701	ZH16_S1_vs_ZH6_S1;ZH16_S2_vs_ZH6_S2;ZH16_S3_vs_ZH6_S3;ZH16_S4_vs_ZH6_S4	--	--	1.95814	8.83659	18.322	74.5743	0	0.299197	0.932429	0.861002
Novel02332	ZH16_S1_vs_ZH6_S1;ZH16_S2_vs_ZH6_S2;ZH16_S3_vs_ZH6_S3;ZH16_S4_vs_ZH6_S4	--	--	1.81485	23.068	8.75643	13.8413	0.453926	1.54996	0.907474	0.0494137
Novel00924	ZH16_S1_vs_ZH6_S1;ZH16_S2_vs_ZH6_S2;ZH16_S3_vs_ZH6_S3;ZH16_S4_vs_ZH6_S4	--	PREDICTED: uncharacterized protein LOC100815196 isoform X1 [Glycine max]>gi|571553853|ref|XP_006603893.1| PREDICTED: uncharacterized protein LOC100815196 isoform X2 [Glycine max]>gi|734437934|gb|KHN48797.1| hypothetical protein glysoja_030567 [Glycine soja]	6.51441	10.343	4.47958	3.86614	0.567796	0.125433	0.196924	0.0325939
Novel01308	ZH16_S1_vs_ZH6_S1;ZH16_S2_vs_ZH6_S2;ZH16_S3_vs_ZH6_S3;ZH16_S4_vs_ZH6_S4	--	--	2.5442	3.3997	2.66155	2.27857	0.409827	0	0	0.051307
Novel01051	ZH16_S1_vs_ZH6_S1;ZH16_S2_vs_ZH6_S2;ZH16_S3_vs_ZH6_S3;ZH16_S4_vs_ZH6_S4	--	PREDICTED: F-box/kelch-repeat protein At5g15710-like [Glycine max]	6.58282	4.38661	3.13605	1.91844	0.267735	0.0980317	0.0266904	0
arahy.YFBV2Q	ZH16_S1_vs_ZH6_S1;ZH16_S2_vs_ZH6_S2;ZH16_S3_vs_ZH6_S3;ZH16_S4_vs_ZH6_S4	--	RNA-binding protein 39-like [Glycine max]	1.32687	3.37738	2.18052	2.09415	0.236705	0.160187	0.0575257	0.0673287
Novel00927	ZH16_S1_vs_ZH6_S1;ZH16_S2_vs_ZH6_S2;ZH16_S3_vs_ZH6_S3;ZH16_S4_vs_ZH6_S4	TF	PREDICTED: transcription factor TCP13-like [Glycine max]>gi|734354103|gb|KHN13541.1| Transcription factor TCP13 [Glycine soja]	4.66088	12.4577	6.92854	2.45825	1.25702	2.08282	1.04468	0.522238
arahy.DYR849	ZH16_S1_vs_ZH6_S1;ZH16_S2_vs_ZH6_S2;ZH16_S3_vs_ZH6_S3;ZH16_S4_vs_ZH6_S4	--	Unknown protein	4.78693	14.5172	6.80082	6.50314	0.493588	0.799171	0.560307	0.127111
arahy.SK6LYR	ZH16_S1_vs_ZH6_S1;ZH16_S2_vs_ZH6_S2;ZH16_S3_vs_ZH6_S3;ZH16_S4_vs_ZH6_S4	--	Disease resistance protein (TIR-NBS-LRR class)	1.4909	1.08645	0.669406	0.580257	0.106668	0.0302177	0.0131306	0
Novel00132	ZH16_S1_vs_ZH6_S1;ZH16_S2_vs_ZH6_S2;ZH16_S3_vs_ZH6_S3;ZH16_S4_vs_ZH6_S4	--	--	4.14375	4.52165	7.78722	7.38225	0.505438	0	0.0325906	0
arahy.3ZA78K	ZH16_S1_vs_ZH6_S1;ZH16_S2_vs_ZH6_S2;ZH16_S3_vs_ZH6_S3;ZH16_S4_vs_ZH6_S4	--	flavonol synthase/flavanone 3-hydroxylase-like [Glycine max]	7.03923	8.2503	5.55813	2.67436	0.430654	0.0497032	0.0647932	0
arahy.ST1U5I	ZH16_S1_vs_ZH6_S1;ZH16_S2_vs_ZH6_S2;ZH16_S3_vs_ZH6_S3;ZH16_S4_vs_ZH6_S4	--	minor allergen Alt a 7-like [Glycine max]	4.03279	8.13022	8.22577	9.18953	0.366593	0.227473	0.165457	0
Novel00305	ZH16_S1_vs_ZH6_S1;ZH16_S2_vs_ZH6_S2;ZH16_S3_vs_ZH6_S3;ZH16_S4_vs_ZH6_S4	--	--	3.89197	3.55252	5.26775	2.85752	0.330063	0	0	0
arahy.1J3CUB	ZH16_S1_vs_ZH6_S1;ZH16_S2_vs_ZH6_S2;ZH16_S3_vs_ZH6_S3;ZH16_S4_vs_ZH6_S4	--	UDP-Glycosyltransferase superfamily protein	1.02597	3.1734	4.03965	1.54337	0.0762701	0.125221	0.282282	0
Novel04964	ZH16_S1_vs_ZH6_S1;ZH16_S2_vs_ZH6_S2;ZH16_S3_vs_ZH6_S3;ZH16_S4_vs_ZH6_S4	--	--	4.24749	7.52559	17.4214	8.56872	0.25656	0.297152	0.434252	0
arahy.2EPV6W	ZH16_S1_vs_ZH6_S1;ZH16_S2_vs_ZH6_S2;ZH16_S3_vs_ZH6_S3;ZH16_S4_vs_ZH6_S4	--	U-box domain-containing protein 18-like [Glycine max]	1.92895	0.549457	0.499115	0.612311	0.0224549	0.042835	0	0
Novel02768	ZH16_S1_vs_ZH6_S1;ZH16_S2_vs_ZH6_S2;ZH16_S3_vs_ZH6_S3;ZH16_S4_vs_ZH6_S4	--	Rab3 GTPase-activating protein catalytic subunit [Medicago truncatula]	2.33933	11.8383	4.1309	5.95102	0.168113	1.16116	0.151749	0.10641
arahy.1J7JSX	ZH16_S1_vs_ZH6_S1;ZH16_S2_vs_ZH6_S2;ZH16_S3_vs_ZH6_S3;ZH16_S4_vs_ZH6_S4	--	uncharacterized ATP-dependent helicase C29A10.10c-like isoform X2 [Glycine max]	2.47862	3.05697	2.10673	1.56783	0.175155	0.0568553	0.0444699	0
Novel00043	ZH16_S1_vs_ZH6_S1;ZH16_S2_vs_ZH6_S2;ZH16_S3_vs_ZH6_S3;ZH16_S4_vs_ZH6_S4	--	--	7.19823	8.86685	7.71227	8.22249	0.815273	0.415906	0.11585	0
arahy.ZPHF5W	ZH16_S1_vs_ZH6_S1;ZH16_S2_vs_ZH6_S2;ZH16_S3_vs_ZH6_S3;ZH16_S4_vs_ZH6_S4	--	Unknown protein	4.38942	5.87832	3.81125	3.72759	0.270365	0.114104	0.113891	0
arahy.60EZUA	ZH16_S1_vs_ZH6_S1;ZH16_S2_vs_ZH6_S2;ZH16_S3_vs_ZH6_S3;ZH16_S4_vs_ZH6_S4	--	U11/U12 small nuclear ribonucleoprotein 25 kDa protein-like isoform X7 [Glycine max]	1.4446	2.0426	1.53688	4.95582	0.174293	0.184683	0.0331206	0
arahy.Y3S9ZW	ZH16_S1_vs_ZH6_S1;ZH16_S2_vs_ZH6_S2;ZH16_S3_vs_ZH6_S3;ZH16_S4_vs_ZH6_S4	--	anthranilate synthase alpha subunit 1	2.79595	20.084	13.4124	14.4458	0.467376	0.485356	0.316416	0
Novel03900	ZH16_S1_vs_ZH6_S1;ZH16_S2_vs_ZH6_S2;ZH16_S3_vs_ZH6_S3;ZH16_S4_vs_ZH6_S4	--	PREDICTED: uncharacterized protein LOC104109606 [Nicotiana tomentosiformis]	2.74392	6.28363	4.82392	4.63386	0.482803	0.507038	0.100979	0.0290289
arahy.REUM3H	ZH16_S1_vs_ZH6_S1;ZH16_S2_vs_ZH6_S2;ZH16_S3_vs_ZH6_S3;ZH16_S4_vs_ZH6_S4	--	glucose-6-phosphate isomerase	5.00293	18.4046	11.8437	16.757	1.05224	0.414409	0.414147	0
arahy.N15JJB	ZH16_S1_vs_ZH6_S1;ZH16_S2_vs_ZH6_S2;ZH16_S3_vs_ZH6_S3;ZH16_S4_vs_ZH6_S4	--	phosphoglycerate/bisphosphoglycerate mutase family protein	59.255	51.6675	31.4854	28.6997	2.08737	1.49705	0.571998	0
arahy.S1VZZB	ZH16_S1_vs_ZH6_S1;ZH16_S2_vs_ZH6_S2;ZH16_S3_vs_ZH6_S3;ZH16_S4_vs_ZH6_S4	--	disease resistance protein [Glycine max]	3.23363	3.44316	3.22768	3.16398	0.39214	0.0501044	0	0
Novel00923	ZH16_S1_vs_ZH6_S1;ZH16_S2_vs_ZH6_S2;ZH16_S3_vs_ZH6_S3;ZH16_S4_vs_ZH6_S4	--	--	11.2417	7.4765	8.52789	7.30772	0.995488	0.224696	0.0551307	0
Novel04909	ZH16_S1_vs_ZH6_S1;ZH16_S2_vs_ZH6_S2;ZH16_S3_vs_ZH6_S3;ZH16_S4_vs_ZH6_S4	--	--	0.957511	1.38827	0.978175	1.40027	0.0681902	0.101241	0.0564231	0
arahy.6CI6DX	ZH16_S1_vs_ZH6_S1;ZH16_S2_vs_ZH6_S2;ZH16_S3_vs_ZH6_S3;ZH16_S4_vs_ZH6_S4	--	GHMP kinase ATP-binding protein, putative	2.07118	4.22549	4.16214	5.42186	0.0693006	0.177093	0	0
arahy.Q3G26L	ZH16_S1_vs_ZH6_S1;ZH16_S2_vs_ZH6_S2;ZH16_S3_vs_ZH6_S3;ZH16_S4_vs_ZH6_S4	--	Protein kinase superfamily protein	7.16214	6.00709	4.46352	2.15865	1.35638	0.181574	0.0701197	0.0182366
Novel00176	ZH16_S1_vs_ZH6_S1;ZH16_S2_vs_ZH6_S2;ZH16_S3_vs_ZH6_S3;ZH16_S4_vs_ZH6_S4	--	--	15.2624	13.678	5.73699	5.14072	0.926289	0.237802	0.373272	0
Novel03514	ZH16_S1_vs_ZH6_S1;ZH16_S2_vs_ZH6_S2;ZH16_S3_vs_ZH6_S3;ZH16_S4_vs_ZH6_S4	--	PREDICTED: microtubule-associated tumor suppressor 1 homolog [Glycine max]	5.99254	8.60537	3.48244	4.15557	0.891872	0.812439	0.289398	0
arahy.FB4WK1	ZH16_S1_vs_ZH6_S1;ZH16_S2_vs_ZH6_S2;ZH16_S3_vs_ZH6_S3;ZH16_S4_vs_ZH6_S4	--	uncharacterized protein LOC100789779 isoform X1 [Glycine max]	1.26841	5.07468	1.00493	3.86971	0.159905	0.0150997	0	0
Novel01203	ZH16_S1_vs_ZH6_S1;ZH16_S2_vs_ZH6_S2;ZH16_S3_vs_ZH6_S3;ZH16_S4_vs_ZH6_S4	--	hypothetical protein [Beta vulgaris subsp. vulgaris]	13.6771	3.88661	2.47492	2.06308	1.00433	0.0997469	0.01558	0
Novel00075	ZH16_S1_vs_ZH6_S1;ZH16_S2_vs_ZH6_S2;ZH16_S3_vs_ZH6_S3;ZH16_S4_vs_ZH6_S4	--	--	0.805472	2.68765	2.22628	1.99891	0.126115	0.0117432	0.0373351	0
Novel03413	ZH16_S1_vs_ZH6_S1;ZH16_S2_vs_ZH6_S2;ZH16_S3_vs_ZH6_S3;ZH16_S4_vs_ZH6_S4	--	--	2.11928	3.32119	2.60939	2.77597	0.119864	0.147423	0	0.0590967
arahy.VHY4LV	ZH16_S1_vs_ZH6_S1;ZH16_S2_vs_ZH6_S2;ZH16_S3_vs_ZH6_S3;ZH16_S4_vs_ZH6_S4	--	kinesin-3-like isoform 1 [Glycine max]	2.51425	13.2525	5.37085	6.70721	0.348394	0.120628	0.104834	0
arahy.J3NUVE	ZH16_S1_vs_ZH6_S1;ZH16_S2_vs_ZH6_S2;ZH16_S3_vs_ZH6_S3;ZH16_S4_vs_ZH6_S4	--	adenine nucleotide alpha hydrolase-like domain kinase	3.84938	4.05164	2.60025	4.35916	0.33008	0.250615	0.220849	0
Novel02153	ZH16_S1_vs_ZH6_S1;ZH16_S2_vs_ZH6_S2;ZH16_S3_vs_ZH6_S3;ZH16_S4_vs_ZH6_S4	--	--	3.66822	28.1617	10.2999	14.1723	0.834003	1.37522	0.227424	0.120976
arahy.9JBJ7A	ZH16_S1_vs_ZH6_S1;ZH16_S2_vs_ZH6_S2;ZH16_S3_vs_ZH6_S3;ZH16_S4_vs_ZH6_S4	SNF2	chromatin remodeling 31	0.812459	10.1691	7.18651	4.83648	0.0231668	0	0	0
arahy.6SV4GY	ZH16_S1_vs_ZH6_S1;ZH16_S2_vs_ZH6_S2;ZH16_S3_vs_ZH6_S3;ZH16_S4_vs_ZH6_S4	--	nucleosome assembly protein 1	5.52088	22.328	14.1088	10.6352	0.787312	1.00217	0.411443	0
arahy.LR7J2X	ZH16_S1_vs_ZH6_S1;ZH16_S2_vs_ZH6_S2;ZH16_S3_vs_ZH6_S3;ZH16_S4_vs_ZH6_S4	--	acyl-CoA binding protein 4	1.93897	10.2364	3.63517	7.82236	0.375918	0	0	0
arahy.VAQ7MX	ZH16_S1_vs_ZH6_S1;ZH16_S2_vs_ZH6_S2;ZH16_S3_vs_ZH6_S3;ZH16_S4_vs_ZH6_S4	--	Unknown protein	19.4108	34.5815	16.064	17.0798	1.52629	2.70087	2.76997	0.940183
arahy.7JHN4J	ZH16_S1_vs_ZH6_S1;ZH16_S2_vs_ZH6_S2;ZH16_S3_vs_ZH6_S3;ZH16_S4_vs_ZH6_S4	TF	MADS-box transcription factor family protein	49.1387	80.269	19.1691	7.38723	4.27936	1.25662	0.21288	0
Novel04455	ZH16_S1_vs_ZH6_S1;ZH16_S2_vs_ZH6_S2;ZH16_S3_vs_ZH6_S3;ZH16_S4_vs_ZH6_S4	--	putative vesicle-associated membrane protein family protein [Zea mays]	4.05641	9.53758	8.96091	8.35998	0.621362	0.0496203	0.157757	0
arahy.67IN6Q	ZH16_S1_vs_ZH6_S1;ZH16_S2_vs_ZH6_S2;ZH16_S3_vs_ZH6_S3;ZH16_S4_vs_ZH6_S4	--	Unknown protein	26.2819	34.3154	27.7406	26.8902	1.86469	1.55419	0	0
arahy.MUY6N8	ZH16_S1_vs_ZH6_S1;ZH16_S2_vs_ZH6_S2;ZH16_S3_vs_ZH6_S3;ZH16_S4_vs_ZH6_S4	--	subtilisin-like serine protease 2	0.494012	5.2133	1.91587	2.83892	0.106932	0.0553257	0.0497699	0
arahy.GUVP28	ZH16_S1_vs_ZH6_S1;ZH16_S2_vs_ZH6_S2;ZH16_S3_vs_ZH6_S3;ZH16_S4_vs_ZH6_S4	--	translation initiation factor eIF-2B delta subunit	3.59857	4.28829	6.11971	4.90495	0.297817	0.07557	0.126377	0.0353982
arahy.AL59ZJ	ZH16_S1_vs_ZH6_S1;ZH16_S2_vs_ZH6_S2;ZH16_S3_vs_ZH6_S3;ZH16_S4_vs_ZH6_S4	--	cysteine protease ATG4B	6.87999	8.42328	3.33293	4.35036	0.887468	0.308084	0.0699357	0
Novel02754	ZH16_S1_vs_ZH6_S1;ZH16_S2_vs_ZH6_S2;ZH16_S3_vs_ZH6_S3;ZH16_S4_vs_ZH6_S4	--	Retrovirus-related Pol polyprotein from transposon TNT 1-94, partial [Glycine soja]	6.12247	2.13746	1.53976	1.2565	0.481881	0	0.043697	0
arahy.KHQ45H	ZH16_S1_vs_ZH6_S1;ZH16_S2_vs_ZH6_S2;ZH16_S3_vs_ZH6_S3;ZH16_S4_vs_ZH6_S4	--	protein kinase family protein	12.3195	38.6678	13.1658	11.3757	0.879876	2.32761	0.613736	0.278465
arahy.JC6ZCB	ZH16_S1_vs_ZH6_S1;ZH16_S2_vs_ZH6_S2;ZH16_S3_vs_ZH6_S3;ZH16_S4_vs_ZH6_S4	--	phosphoribosylaminoimidazole-succinocarboxamide synthase	9.79179	8.85465	9.16822	8.91804	1.10467	1.05437	0.221856	0.0257811
Novel00261	ZH16_S1_vs_ZH6_S1;ZH16_S2_vs_ZH6_S2;ZH16_S3_vs_ZH6_S3;ZH16_S4_vs_ZH6_S4	--	PREDICTED: proline-rich receptor-like protein kinase PERK14 [Cicer arietinum]	1.83541	4.56671	6.10346	8.48313	0.240994	0.129277	0.217538	0
Novel01668	ZH16_S1_vs_ZH6_S1;ZH16_S2_vs_ZH6_S2;ZH16_S3_vs_ZH6_S3;ZH16_S4_vs_ZH6_S4	--	unknown [Lotus japonicus]	1.72995	40.3736	7.53149	14.8661	0.299851	0.490514	0.116006	0
Novel03474	ZH16_S1_vs_ZH6_S1;ZH16_S2_vs_ZH6_S2;ZH16_S3_vs_ZH6_S3;ZH16_S4_vs_ZH6_S4	--	--	0.928346	2.25436	1.93635	2.0742	0.0833907	0	0	0
arahy.GHMM2H	ZH16_S1_vs_ZH6_S1;ZH16_S2_vs_ZH6_S2;ZH16_S3_vs_ZH6_S3;ZH16_S4_vs_ZH6_S4	--	C-terminal domain phosphatase-like 4	4.92197	8.10255	2.40374	3.19568	0.640957	0.103028	0.0344107	0
Novel03408	ZH16_S1_vs_ZH6_S1;ZH16_S2_vs_ZH6_S2;ZH16_S3_vs_ZH6_S3;ZH16_S4_vs_ZH6_S4	C2H2	HGWP repeat containing protein-like protein [Medicago truncatula]	9.20762	9.35245	3.74226	4.69937	0.885476	0.0896344	0.375482	0.289077
arahy.SSUF8X	ZH16_S1_vs_ZH6_S1;ZH16_S2_vs_ZH6_S2;ZH16_S3_vs_ZH6_S3;ZH16_S4_vs_ZH6_S4	--	Unknown protein	1.09248	2.36119	2.56498	5.90158	0.0179975	0.108203	0.0609249	0
arahy.KBA53Y	ZH16_S1_vs_ZH6_S1;ZH16_S2_vs_ZH6_S2;ZH16_S3_vs_ZH6_S3;ZH16_S4_vs_ZH6_S4	--	biotin carboxyl carrier acetyl-CoA carboxylase	35.2978	3.53559	6.40722	3.38947	1.85163	0.0623142	0.133553	0
arahy.GUM2PH	ZH16_S1_vs_ZH6_S1;ZH16_S2_vs_ZH6_S2;ZH16_S3_vs_ZH6_S3;ZH16_S4_vs_ZH6_S4	--	nucleobase-ascorbate transporter 12-like [Glycine max]	5.09007	10.5805	7.26281	4.88452	0.459262	2.10346	1.43012	0.417017
arahy.PC7X5T	ZH16_S1_vs_ZH6_S1;ZH16_S2_vs_ZH6_S2;ZH16_S3_vs_ZH6_S3;ZH16_S4_vs_ZH6_S4	--	Regulator of chromosome condensation (RCC1) family protein	4.614	7.70092	3.08238	4.36817	0.484092	0.123391	0.2026	0
arahy.8P3ZQ3	ZH16_S1_vs_ZH6_S1;ZH16_S2_vs_ZH6_S2;ZH16_S3_vs_ZH6_S3;ZH16_S4_vs_ZH6_S4	--	WPP domain-interacting tail-anchored protein 1-like isoform X2 [Glycine max]	4.58172	7.97092	5.24285	4.07706	0.363192	0.111875	0.0550687	0
arahy.CUW7MQ	ZH16_S1_vs_ZH6_S1;ZH16_S2_vs_ZH6_S2;ZH16_S3_vs_ZH6_S3;ZH16_S4_vs_ZH6_S4	--	RING-H2 finger protein 2B	1.70653	3.18218	4.10332	4.2888	0.285126	0.833827	0.612148	0.820625
Novel03473	ZH16_S1_vs_ZH6_S1;ZH16_S2_vs_ZH6_S2;ZH16_S3_vs_ZH6_S3;ZH16_S4_vs_ZH6_S4	--	--	5.56677	15.5626	9.05392	11.7535	0.384361	0.0410663	0	0.292383
Novel00539	ZH16_S1_vs_ZH6_S1;ZH16_S2_vs_ZH6_S2;ZH16_S3_vs_ZH6_S3;ZH16_S4_vs_ZH6_S4	--	hypothetical protein [Beta vulgaris subsp. vulgaris]	4.46108	9.66331	4.87976	7.1065	0.917953	1.21306	0.794686	0.254272
Novel02706	ZH16_S1_vs_ZH6_S1;ZH16_S2_vs_ZH6_S2;ZH16_S3_vs_ZH6_S3;ZH16_S4_vs_ZH6_S4	--	--	6.01548	6.91531	6.9297	4.88085	0.569489	0.421779	0.245852	0
arahy.Y6RVYE	ZH16_S1_vs_ZH6_S1;ZH16_S2_vs_ZH6_S2;ZH16_S3_vs_ZH6_S3;ZH16_S4_vs_ZH6_S4	--	Vesicle transport v-SNARE family protein	3.68401	0.562653	16.8768	19.7684	0.0560583	0	0.365619	0.0169232
arahy.BTPC7R	ZH16_S1_vs_ZH6_S1;ZH16_S2_vs_ZH6_S2;ZH16_S3_vs_ZH6_S3;ZH16_S4_vs_ZH6_S4	--	endoplasmic reticulum metallopeptidase 1-like [Glycine max]	3.08174	7.5037	2.71577	3.55852	0.269962	0.212428	0.14622	0
arahy.35RYQ5	ZH16_S1_vs_ZH6_S1;ZH16_S2_vs_ZH6_S2;ZH16_S3_vs_ZH6_S3;ZH16_S4_vs_ZH6_S4	--	Interferon-induced GTP-binding protein Mx n=1 Tax=Medicago truncatula RepID=G7L7C1_MEDTR	6.52773	68.6173	23.1557	22.5632	1.3004	1.40843	0.373494	0
Novel01713	ZH16_S1_vs_ZH6_S1;ZH16_S2_vs_ZH6_S2;ZH16_S3_vs_ZH6_S3;ZH16_S4_vs_ZH6_S4	--	methyltransferase 21D-like protein [Medicago truncatula]	2.09972	4.22014	1.3707	2.80059	0.223894	0.0574794	0.021655	0.0394239
Novel01048	ZH16_S1_vs_ZH6_S1;ZH16_S2_vs_ZH6_S2;ZH16_S3_vs_ZH6_S3;ZH16_S4_vs_ZH6_S4	--	--	8.57269	13.657	8.18266	5.04984	1.43396	0.565288	0.0868294	0
Novel01827	ZH16_S1_vs_ZH6_S1;ZH16_S2_vs_ZH6_S2;ZH16_S3_vs_ZH6_S3;ZH16_S4_vs_ZH6_S4	--	--	0.574849	2.41382	1.16377	2.59216	0.0217267	0.022568	0	0
arahy.SG5ZZ4	ZH16_S1_vs_ZH6_S1;ZH16_S2_vs_ZH6_S2;ZH16_S3_vs_ZH6_S3;ZH16_S4_vs_ZH6_S4	--	unknown protein	11.5142	13.4552	8.30463	5.00372	1.10489	0.423243	0.14836	0.0300107
Novel04383	ZH16_S1_vs_ZH6_S1;ZH16_S2_vs_ZH6_S2;ZH16_S3_vs_ZH6_S3;ZH16_S4_vs_ZH6_S4	--	PREDICTED: uncharacterized protein LOC102596538 [Solanum tuberosum]	3.02609	3.75081	3.21916	3.2272	0.273018	0.193255	0.232756	0
arahy.K7F148	ZH16_S1_vs_ZH6_S1;ZH16_S2_vs_ZH6_S2;ZH16_S3_vs_ZH6_S3;ZH16_S4_vs_ZH6_S4	--	MATE efflux family protein	9.45218	12.0687	6.50956	3.20744	1.0362	1.88274	0.919837	0.467226
Novel01442	ZH16_S1_vs_ZH6_S1;ZH16_S2_vs_ZH6_S2;ZH16_S3_vs_ZH6_S3;ZH16_S4_vs_ZH6_S4	--	--	6.1018	6.64723	17.1015	19.7524	0.319537	0.124608	0.341571	0
arahy.DM7MDF	ZH16_S2_vs_ZH6_S2;ZH16_S3_vs_ZH6_S3;ZH16_S4_vs_ZH6_S4	--	histidine kinase 1	4.21685	33.7928	5.61182	12.9729	0.914768	0.552452	0.137621	0
Novel00134	ZH16_S2_vs_ZH6_S2;ZH16_S3_vs_ZH6_S3;ZH16_S4_vs_ZH6_S4	--	--	0.148477	2.33895	1.83641	2.84489	0.0389606	0	0	0
Novel01714	ZH16_S2_vs_ZH6_S2;ZH16_S3_vs_ZH6_S3;ZH16_S4_vs_ZH6_S4	--	retrotransposon gag protein [Arachis hypogaea]	1.65138	11.8151	3.16923	6.24664	0.436747	0.317553	0.0677588	0
arahy.ENP7F5	ZH16_S2_vs_ZH6_S2;ZH16_S3_vs_ZH6_S3;ZH16_S4_vs_ZH6_S4	--	ATP-dependent chaperone ClpB	0.90446	10.4815	9.34907	5.32559	0.732168	0.200735	0.165229	0
arahy.TJMB8X	ZH16_S2_vs_ZH6_S2;ZH16_S3_vs_ZH6_S3;ZH16_S4_vs_ZH6_S4	--	ATP binding protein, putative n=1 Tax=Ricinus communis RepID=B9S2I7_RICCO	3.85732	22.2237	7.46324	7.99669	2.90629	1.58444	1.06715	1.19725
Novel03699	ZH16_S2_vs_ZH6_S2;ZH16_S3_vs_ZH6_S3;ZH16_S4_vs_ZH6_S4	--	TIR-NBS-LRR type disease resistance protein [Arachis hypogaea]	0.711031	4.2068	1.56026	2.04311	0.297304	0.047504	0.0670926	0
arahy.V6NF3H	ZH16_S1_vs_ZH6_S1;ZH16_S2_vs_ZH6_S2;ZH16_S3_vs_ZH6_S3	TF	WRKY family transcription factor family protein	7.54728	9.09069	4.17256	2.02165	0.318371	0	0.0538874	0.0981044
arahy.NV11DU	ZH16_S1_vs_ZH6_S1;ZH16_S2_vs_ZH6_S2;ZH16_S3_vs_ZH6_S3	--	glycoside hydrolase family 81 protein	0.764185	2.43072	1.21118	0.693716	0.065092	0.0958909	0	0
arahy.S1KKCT	ZH16_S2_vs_ZH6_S2;ZH16_S3_vs_ZH6_S3;ZH16_S4_vs_ZH6_S4	--	40s ribosomal protein SA	6.02084	12.6474	13.7793	8.51796	1.24342	0.491778	0.169669	0.13631
Novel04582	ZH16_S2_vs_ZH6_S2;ZH16_S3_vs_ZH6_S3;ZH16_S4_vs_ZH6_S4	--	--	0.541568	6.70802	2.37803	6.31859	0.120382	0	0	0
Novel03126	ZH16_S2_vs_ZH6_S2;ZH16_S3_vs_ZH6_S3;ZH16_S4_vs_ZH6_S4	--	hypothetical protein PRUPE_ppa006208mg [Prunus persica]>gi|462395246|gb|EMJ01045.1| hypothetical protein PRUPE_ppa006208mg [Prunus persica]	0.694764	2.5707	2.32097	2.76177	0.225075	0.0644228	0.0519996	0.13369
arahy.RALJ2M	ZH16_S2_vs_ZH6_S2;ZH16_S3_vs_ZH6_S3;ZH16_S4_vs_ZH6_S4	--	Raffinose synthase family protein	3.45871	12.4631	8.57933	10.2137	1.13681	0.51083	0.171028	0
arahy.90E6RV	ZH16_S1_vs_ZH6_S1;ZH16_S2_vs_ZH6_S2;ZH16_S3_vs_ZH6_S3	--	Pentatricopeptide repeat (PPR) superfamily protein	0.564008	3.47662	1.47514	1.27082	0.0401275	0.523558	0.235442	0.192051
arahy.52AYY4	ZH16_S2_vs_ZH6_S2;ZH16_S3_vs_ZH6_S3;ZH16_S4_vs_ZH6_S4	--	Peptide chain release factor 1	0.747125	8.23697	3.36348	4.04617	0.103839	1.53778	0.785033	0.734227
arahy.P0I32D	ZH16_S2_vs_ZH6_S2;ZH16_S3_vs_ZH6_S3;ZH16_S4_vs_ZH6_S4	--	protein kinase family protein	1.07968	1.8995	1.46214	2.19901	0.146161	0.0910925	0.0395827	0
arahy.PE1GUB	ZH16_S2_vs_ZH6_S2;ZH16_S3_vs_ZH6_S3;ZH16_S4_vs_ZH6_S4	--	Protein kinase superfamily protein	1.81646	4.5988	3.34245	1.31776	0.386526	0.201819	0	0
Novel00444	ZH16_S2_vs_ZH6_S2;ZH16_S3_vs_ZH6_S3;ZH16_S4_vs_ZH6_S4	--	--	1.37542	6.83056	4.79312	4.89196	0.58159	0.432905	0.174998	0
arahy.M6RMKN	ZH16_S2_vs_ZH6_S2;ZH16_S3_vs_ZH6_S3;ZH16_S4_vs_ZH6_S4	--	ATP-binding microtubule motor family protein	0.725696	5.07964	0.800474	0.520946	0.242672	0.0900775	0.0604262	0
arahy.KXIJ9T	ZH16_S2_vs_ZH6_S2;ZH16_S3_vs_ZH6_S3;ZH16_S4_vs_ZH6_S4	--	F1F0-ATPase inhibitor protein, putative	6.27019	22.8035	8.63531	8.7127	1.23675	0.633792	0.139554	0
Novel02716	ZH16_S2_vs_ZH6_S2;ZH16_S3_vs_ZH6_S3;ZH16_S4_vs_ZH6_S4	--	--	1.88902	2.6169	3.35895	2.07914	0.316283	0	0	0
arahy.3Q5F2Z	ZH16_S2_vs_ZH6_S2;ZH16_S3_vs_ZH6_S3;ZH16_S4_vs_ZH6_S4	--	beta glucosidase 27	0.89872	3.00482	1.69274	2.08303	0.113011	0.081236	0.0306052	0
arahy.LQJ2G8	ZH16_S1_vs_ZH6_S1;ZH16_S2_vs_ZH6_S2;ZH16_S4_vs_ZH6_S4	--	uncharacterized protein LOC102664163 isoform X7 [Glycine max]	7.84837	7.48072	1.27807	3.02862	0.643102	1.48915	0.413444	0.21309
Novel00001	ZH16_S2_vs_ZH6_S2;ZH16_S3_vs_ZH6_S3;ZH16_S4_vs_ZH6_S4	--	--	0.741867	5.43261	1.64465	2.34623	0.172415	0.0275373	0.029183	0
Novel00714	ZH16_S2_vs_ZH6_S2;ZH16_S3_vs_ZH6_S3;ZH16_S4_vs_ZH6_S4	--	--	0.937322	3.74982	34.2487	25.2233	0.27748	0.114452	0.549953	0
arahy.4J8AWY	ZH16_S1_vs_ZH6_S1;ZH16_S2_vs_ZH6_S2;ZH16_S3_vs_ZH6_S3	--	Pentatricopeptide repeat (PPR) superfamily protein	1.43544	4.18997	1.65742	2.02575	0.453925	1.14251	0.564277	1.05409
Novel01905	ZH16_S2_vs_ZH6_S2;ZH16_S3_vs_ZH6_S3;ZH16_S4_vs_ZH6_S4	--	--	0.367644	3.33408	1.87323	2.73605	0.0712982	0.0185147	0.0241358	0
Novel03357	ZH16_S1_vs_ZH6_S1;ZH16_S2_vs_ZH6_S2;ZH16_S3_vs_ZH6_S3	--	PREDICTED: uncharacterized protein LOC100793977 [Glycine max]	1.08425	6.2645	3.85499	3.78211	0.27705	1.96532	1.53473	1.62136
arahy.BZS6Y3	ZH16_S2_vs_ZH6_S2;ZH16_S3_vs_ZH6_S3;ZH16_S4_vs_ZH6_S4	--	Protein kinase superfamily protein	37.6397	23.6281	19.7902	18.7135	26.6191	8.92932	7.88792	6.72892
arahy.APY3E0	ZH16_S1_vs_ZH6_S1;ZH16_S2_vs_ZH6_S2;ZH16_S4_vs_ZH6_S4	--	Methyltransferase family protein	7.80616	25.9232	13.0017	13.7757	3.67279	8.93316	7.99311	6.09728
Novel01891	ZH16_S2_vs_ZH6_S2;ZH16_S3_vs_ZH6_S3;ZH16_S4_vs_ZH6_S4	--	hypothetical protein MTR_4g115940 [Medicago truncatula]	0.521145	3.12811	1.52386	2.06578	0.174953	0.0655653	0.10326	0
arahy.K7EFN7	ZH16_S2_vs_ZH6_S2;ZH16_S3_vs_ZH6_S3;ZH16_S4_vs_ZH6_S4	--	origin recognition complex protein 6	1.14298	9.32143	1.67828	1.78304	0.482011	0.294222	0.021756	0
arahy.YRI3HS	ZH16_S2_vs_ZH6_S2;ZH16_S3_vs_ZH6_S3;ZH16_S4_vs_ZH6_S4	--	Myb/SANT-like DNA-binding domain protein	7.04185	23.286	12.7175	14.0145	1.56177	0.617328	0.639309	0
arahy.PQG7YC	ZH16_S2_vs_ZH6_S2;ZH16_S3_vs_ZH6_S3;ZH16_S4_vs_ZH6_S4	--	Unknown protein	1.10004	4.15286	2.96106	2.28506	0.306447	0	0.0308655	0.0561921
Novel00568	ZH16_S2_vs_ZH6_S2;ZH16_S3_vs_ZH6_S3;ZH16_S4_vs_ZH6_S4	--	--	5.67354	9.19441	19.0434	10.748	1.70595	0	0.346824	0
Novel01334	ZH16_S2_vs_ZH6_S2;ZH16_S3_vs_ZH6_S3;ZH16_S4_vs_ZH6_S4	--	--	0.39874	1.0995	0.689141	1.07176	0.0817204	0	0.0327839	0
arahy.7R2GDL	ZH16_S2_vs_ZH6_S2;ZH16_S3_vs_ZH6_S3;ZH16_S4_vs_ZH6_S4	--	phytochrome A	3.38354	4.85504	6.80824	5.08601	0.750224	0.380166	0.038016	0
Novel00066	ZH16_S2_vs_ZH6_S2;ZH16_S3_vs_ZH6_S3;ZH16_S4_vs_ZH6_S4	--	--	0.409441	3.04166	7.18363	9.08429	0.118858	0.269256	0.0843818	0
Novel00029	ZH16_S2_vs_ZH6_S2;ZH16_S3_vs_ZH6_S3;ZH16_S4_vs_ZH6_S4	--	PREDICTED: protein FAR1-RELATED SEQUENCE 5-like [Glycine max]	1.5151	6.68327	4.44543	4.52874	0.606484	0.3977	0.0421546	0
arahy.5RG0UU	ZH16_S1_vs_ZH6_S1;ZH16_S2_vs_ZH6_S2;ZH16_S4_vs_ZH6_S4	SNF2	putative chromatin-remodeling complex ATPase chain-like isoform 1 [Glycine max]	12.1358	37.9931	13.3937	17.6542	2.89291	14.109	9.52701	6.22954
Novel02459	ZH16_S1_vs_ZH6_S1;ZH16_S3_vs_ZH6_S3;ZH16_S4_vs_ZH6_S4	--	--	12.3612	8.23339	12.7265	16.1144	1.94941	1.72586	0.67949	0.943462
Novel02167	ZH16_S1_vs_ZH6_S1;ZH16_S3_vs_ZH6_S3;ZH16_S4_vs_ZH6_S4	--	PREDICTED: uncharacterized protein LOC104109606 [Nicotiana tomentosiformis]	0.276991	0.198653	1.15753	3.07142	0	0	0.0230946	0
arahy.6ZP1HE	ZH16_S2_vs_ZH6_S2;ZH16_S3_vs_ZH6_S3;ZH16_S4_vs_ZH6_S4	--	Ulp1 protease family, carboxy-terminal domain protein	1.29499	5.08891	2.31955	1.55576	0.497971	0.264583	0.0491112	0
Novel02857	ZH16_S2_vs_ZH6_S2;ZH16_S3_vs_ZH6_S3;ZH16_S4_vs_ZH6_S4	--	--	0.408134	1.02394	0.980169	1.02555	0.0625683	0.0216637	0.00941359	0
arahy.GCZ0RK	ZH16_S2_vs_ZH6_S2;ZH16_S3_vs_ZH6_S3;ZH16_S4_vs_ZH6_S4	--	monodehydroascorbate reductase 1	2.18385	15.5802	9.34664	10.1362	0.448871	0.179299	0.11051	0
Novel03491	ZH16_S2_vs_ZH6_S2;ZH16_S3_vs_ZH6_S3;ZH16_S4_vs_ZH6_S4	--	--	0.529815	3.76008	2.18221	3.04044	0.0615219	0.281374	0	0
arahy.R33BY8	ZH16_S2_vs_ZH6_S2;ZH16_S3_vs_ZH6_S3;ZH16_S4_vs_ZH6_S4	--	COP9 signalosome complex subunit-like protein	9.57195	22.3775	8.06629	7.14702	2.36975	0.473417	0.179809	0.0327375
arahy.CX8U58	ZH16_S2_vs_ZH6_S2;ZH16_S3_vs_ZH6_S3;ZH16_S4_vs_ZH6_S4	--	one helix protein	0.498345	2.91464	2.9663	1.34831	0.120239	0.0874813	0.0232591	0
Novel00925	ZH16_S2_vs_ZH6_S2;ZH16_S3_vs_ZH6_S3;ZH16_S4_vs_ZH6_S4	--	hypothetical protein glysoja_030569 [Glycine soja]	0.0266945	0.411163	1.75862	1.69183	0	0.0127678	0.0665764	0
Novel04777	ZH16_S1_vs_ZH6_S1;ZH16_S2_vs_ZH6_S2;ZH16_S4_vs_ZH6_S4	--	PREDICTED: uncharacterized protein LOC103319022 [Prunus mume]>gi|645223657|ref|XP_008218736.1| PREDICTED: uncharacterized protein LOC103319022 [Prunus mume]	3.42041	14.5944	4.66774	8.63191	0.379623	0.673861	0.960993	0.996642
Novel01143	ZH16_S2_vs_ZH6_S2;ZH16_S3_vs_ZH6_S3;ZH16_S4_vs_ZH6_S4	--	--	3.3913	2.82324	8.63315	3.89855	0.579726	0.0401449	0	0
Novel03282	ZH16_S2_vs_ZH6_S2;ZH16_S3_vs_ZH6_S3;ZH16_S4_vs_ZH6_S4	--	Myosin-like protein [Medicago truncatula]>gi|355481786|gb|AES62989.1| P-loop nucleoside triphosphate hydrolase superfamily protein [Medicago truncatula]	0.856402	3.34533	1.57426	1.57275	0.0718469	0.207616	0.0324287	0
arahy.8MH36V	ZH16_S2_vs_ZH6_S2;ZH16_S3_vs_ZH6_S3;ZH16_S4_vs_ZH6_S4	--	uncharacterized protein LOC100803294 isoform X1 [Glycine max]	0.542793	9.31098	10.3934	14.5556	0.255202	0.192194	0.362013	0
arahy.AV6HSI	ZH16_S2_vs_ZH6_S2;ZH16_S3_vs_ZH6_S3;ZH16_S4_vs_ZH6_S4	SBP	squamosa promoter-binding-like protein 6-like [Glycine max]	1.12784	3.46347	1.07381	1.66578	0.207136	0.0456971	0.0712263	0
arahy.CN05T7	ZH16_S1_vs_ZH6_S1;ZH16_S2_vs_ZH6_S2;ZH16_S3_vs_ZH6_S3	--	poly(rC)-binding protein 1-like [Glycine max]	1.64915	6.41959	2.71127	2.07734	0.0994499	0.0635345	0	0
arahy.S5WRJR	ZH16_S2_vs_ZH6_S2;ZH16_S3_vs_ZH6_S3;ZH16_S4_vs_ZH6_S4	--	ABC transporter family protein	13.6588	74.7742	28.2376	44.9252	2.90125	0.0772286	0.245532	0
arahy.L3HXPU	ZH16_S2_vs_ZH6_S2;ZH16_S3_vs_ZH6_S3;ZH16_S4_vs_ZH6_S4	--	Ribosomal RNA processing Brix domain protein	0.233561	7.36911	1.93518	2.47414	0.916456	0.165485	0.0169993	0
arahy.81UYU3	ZH16_S2_vs_ZH6_S2;ZH16_S3_vs_ZH6_S3;ZH16_S4_vs_ZH6_S4	--	Ribosomal protein L30/L7 family protein	0.80492	5.66362	3.83678	4.32914	0.0862539	0.0881666	0	0.042526
arahy.Z63BRR	ZH16_S1_vs_ZH6_S1;ZH16_S2_vs_ZH6_S2;ZH16_S4_vs_ZH6_S4	--	maestro heat-like repeat-containing protein family member 1-like isoform X2 [Glycine max]	5.95638	11.9149	6.64994	7.04688	2.57053	5.37276	3.30367	2.03743
Novel00952	ZH16_S2_vs_ZH6_S2;ZH16_S3_vs_ZH6_S3;ZH16_S4_vs_ZH6_S4	--	--	18.1726	49.286	2.66939	3.96813	3.63334	0.6789	0.150728	0
Novel02915	ZH16_S2_vs_ZH6_S2;ZH16_S3_vs_ZH6_S3;ZH16_S4_vs_ZH6_S4	--	--	1.59419	2.33248	3.91304	3.55668	0.306381	0.0506939	0	0
Novel03770	ZH16_S1_vs_ZH6_S1;ZH16_S2_vs_ZH6_S2;ZH16_S4_vs_ZH6_S4	--	unknown [Arachis hypogaea]	6.85495	18.0122	7.46811	8.2373	3.14309	6.30117	4.71146	3.90692
Novel00770	ZH16_S2_vs_ZH6_S2;ZH16_S3_vs_ZH6_S3;ZH16_S4_vs_ZH6_S4	--	PREDICTED: uncharacterized protein LOC101509976 [Cicer arietinum]	0.369214	2.09095	1.46631	1.48095	0.327951	0.106504	0.0576753	0
arahy.MK0HFG	ZH16_S2_vs_ZH6_S2;ZH16_S3_vs_ZH6_S3;ZH16_S4_vs_ZH6_S4	--	structural maintenance of chromosomes 2	2.21519	8.30249	2.84163	8.85376	0.087379	0.202408	0	0
arahy.MZSV4J	ZH16_S2_vs_ZH6_S2;ZH16_S3_vs_ZH6_S3;ZH16_S4_vs_ZH6_S4	--	Unknown protein	4.87116	4.6872	5.02047	6.32548	0.855913	0	0.13635	0
arahy.J1YDVJ	ZH16_S2_vs_ZH6_S2;ZH16_S3_vs_ZH6_S3;ZH16_S4_vs_ZH6_S4	--	glycine-rich RNA-binding protein 4	1.83036	5.7659	8.73456	4.50432	0.443542	0.402451	0	0
arahy.IA583T	ZH16_S1_vs_ZH6_S1;ZH16_S3_vs_ZH6_S3;ZH16_S4_vs_ZH6_S4	--	Unknown protein	0.588334	4.82292	2.55489	3.69986	0.0786563	2.08763	0.385545	0.220636
Novel02040	ZH16_S1_vs_ZH6_S1;ZH16_S2_vs_ZH6_S2;ZH16_S3_vs_ZH6_S3	--	PREDICTED: vacuolar protein sorting-associated protein 8 homolog [Glycine max]	1.63265	2.04835	1.87782	0.323646	0.184645	0.157219	0.101337	0.45407
arahy.HH03R7	ZH16_S2_vs_ZH6_S2;ZH16_S3_vs_ZH6_S3;ZH16_S4_vs_ZH6_S4	--	Disease resistance protein (TIR-NBS-LRR class) family	1.70658	4.51759	1.30305	4.21887	0.192164	0	0	0
arahy.YMN7DI	ZH16_S2_vs_ZH6_S2;ZH16_S3_vs_ZH6_S3;ZH16_S4_vs_ZH6_S4	--	ERD (early-responsive to dehydration stress) family protein	1.04175	4.92213	3.00277	4.01682	0.224271	0.174701	0.0539827	0
Novel00827	ZH16_S2_vs_ZH6_S2;ZH16_S3_vs_ZH6_S3;ZH16_S4_vs_ZH6_S4	--	--	1.76553	4.07269	2.41558	2.17071	0.254156	0.117332	0.0382386	0
Novel00130	ZH16_S2_vs_ZH6_S2;ZH16_S3_vs_ZH6_S3;ZH16_S4_vs_ZH6_S4	--	hypothetical protein ARAX_AHF417E07-001 [Arachis hypogaea]	1.23841	1.44207	2.32223	2.47457	0.233915	0	0	0
Novel03618	ZH16_S2_vs_ZH6_S2;ZH16_S3_vs_ZH6_S3;ZH16_S4_vs_ZH6_S4	--	hypothetical protein PRUPE_ppa016870mg [Prunus persica]>gi|462424585|gb|EMJ28848.1| hypothetical protein PRUPE_ppa016870mg [Prunus persica]	7.63523	10.9313	9.22084	6.32872	2.25729	0.294923	0.13146	0
arahy.4RSR2L	ZH16_S1_vs_ZH6_S1;ZH16_S2_vs_ZH6_S2;ZH16_S4_vs_ZH6_S4	--	protein PHYLLO, chloroplastic isoform X2 [Glycine max]	2.6229	13.1939	3.13332	2.20771	0.0958911	1.03713	0.562641	0
arahy.X8HE75	ZH16_S2_vs_ZH6_S2;ZH16_S3_vs_ZH6_S3;ZH16_S4_vs_ZH6_S4	--	hypothetical protein	3.73153	38.3263	8.18436	11.1177	1.29703	0.0210508	0.329282	0
Novel04527	ZH16_S2_vs_ZH6_S2;ZH16_S3_vs_ZH6_S3;ZH16_S4_vs_ZH6_S4	--	--	1.15076	2.57575	2.15968	1.85699	0.18687	0.108227	0.074967	0
Novel04280	ZH16_S1_vs_ZH6_S1;ZH16_S2_vs_ZH6_S2;ZH16_S3_vs_ZH6_S3	--	PREDICTED: nucleoporin NUP188 homolog isoform X1 [Glycine max]	1.52277	13.2237	2.56105	0	0.18695	0.508851	0.352858	0
arahy.87HCIL	ZH16_S2_vs_ZH6_S2;ZH16_S3_vs_ZH6_S3;ZH16_S4_vs_ZH6_S4	--	Unknown protein	0.335458	9.93358	10.5217	7.25986	0.0184519	0.217792	0.0249853	0
arahy.SHRD5B	ZH16_S1_vs_ZH6_S1;ZH16_S3_vs_ZH6_S3;ZH16_S4_vs_ZH6_S4	--	Pentatricopeptide repeat (PPR) superfamily protein	1.54015	1.82009	4.04791	3.47142	0.0577643	0.571615	0.87338	0.557091
arahy.0K456L	ZH16_S1_vs_ZH6_S1;ZH16_S2_vs_ZH6_S2;ZH16_S3_vs_ZH6_S3	--	Cytochrome P450 superfamily protein	8.6087	15.2959	2.91369	2.09689	1.8756	0.107256	0.940819	1.26395
arahy.13T34P	ZH16_S1_vs_ZH6_S1;ZH16_S2_vs_ZH6_S2;ZH16_S4_vs_ZH6_S4	--	receptor-like kinase	3.2639	19.288	5.18489	11.0095	0.509811	3.18311	2.44258	1.07442
arahy.86KBF0	ZH16_S2_vs_ZH6_S2;ZH16_S3_vs_ZH6_S3;ZH16_S4_vs_ZH6_S4	--	filament-like plant protein 4-like isoform X2 [Glycine max]	0.958763	5.26932	2.50003	2.74548	1.29926	0.864543	0.277331	0.16376
Novel03215	ZH16_S2_vs_ZH6_S2;ZH16_S3_vs_ZH6_S3;ZH16_S4_vs_ZH6_S4	--	PREDICTED: uncharacterized protein LOC104891432 [Beta vulgaris subsp. vulgaris]	0.0613431	1.19449	0.798476	1.32935	0	0	0	0.0473018
Novel03561	ZH16_S1_vs_ZH6_S1;ZH16_S2_vs_ZH6_S2;ZH16_S4_vs_ZH6_S4	--	PREDICTED: deoxyuridine 5'-triphosphate nucleotidohydrolase [Cucumis sativus]>gi|700207473|gb|KGN62592.1| hypothetical protein Csa_2G361570 [Cucumis sativus]	4.18365	4.15257	0.967008	3.18881	0.440894	0.502582	0.194618	0.0759276
arahy.JAA9B4	ZH16_S2_vs_ZH6_S2;ZH16_S3_vs_ZH6_S3;ZH16_S4_vs_ZH6_S4	--	disease resistance protein	0.442612	1.4057	1.02621	0.966694	0.100971	0.00992406	0	0
arahy.GDDC9H	ZH16_S2_vs_ZH6_S2;ZH16_S3_vs_ZH6_S3;ZH16_S4_vs_ZH6_S4	--	Ulp1 protease family, carboxy-terminal domain protein	17.0793	45.2584	16.129	24.6652	10.2929	21.6228	7.67084	3.15574
arahy.AYL6ZU	ZH16_S1_vs_ZH6_S1;ZH16_S2_vs_ZH6_S2;ZH16_S4_vs_ZH6_S4	--	Ribosomal protein S3 family protein	2.17795	6.32421	1.36856	1.92623	0.205719	2.19936	0.635667	0.14919
arahy.KRT6BL	ZH16_S1_vs_ZH6_S1;ZH16_S3_vs_ZH6_S3;ZH16_S4_vs_ZH6_S4	--	Unknown protein	44.6191	1.55258	7.31907	15.9026	3.59483	0.550674	0.702274	1.45419
arahy.ADK8RR	ZH16_S2_vs_ZH6_S2;ZH16_S3_vs_ZH6_S3;ZH16_S4_vs_ZH6_S4	--	embryonic stem cell-specific 5-hydroxymethylcytosine-binding protein-like [Glycine max]	0.288607	4.17339	0.960938	0.979507	0.148958	0.269315	0	0
arahy.WK1M58	ZH16_S2_vs_ZH6_S2;ZH16_S3_vs_ZH6_S3;ZH16_S4_vs_ZH6_S4	--	proline dehydrogenase	31.0639	30.6928	103.653	51.9145	21.414	5.24828	6.71971	4.85452
Novel04370	ZH16_S2_vs_ZH6_S2;ZH16_S3_vs_ZH6_S3;ZH16_S4_vs_ZH6_S4	--	PREDICTED: uncharacterized protein LOC104217531 [Nicotiana sylvestris]	5.82815	22.9497	10.8488	14.8626	1.29424	0.491803	0.304413	0
arahy.GT4ACT	ZH16_S2_vs_ZH6_S2;ZH16_S3_vs_ZH6_S3;ZH16_S4_vs_ZH6_S4	--	Lipase/lipooxygenase, PLAT/LH2 family protein	0.78122	2.27831	1.18782	0.871795	0.131403	0.0767103	0	0
Novel00294	ZH16_S2_vs_ZH6_S2;ZH16_S3_vs_ZH6_S3;ZH16_S4_vs_ZH6_S4	--	--	0.130375	1.35262	2.25415	3.13832	0.0587971	0.010179	0.0132693	0
Novel00769	ZH16_S2_vs_ZH6_S2;ZH16_S3_vs_ZH6_S3;ZH16_S4_vs_ZH6_S4	--	PREDICTED: uncharacterized protein LOC101515413 isoform X2 [Cicer arietinum]	0.745739	2.96701	1.97103	1.78438	0.258798	0.0998604	0	0
arahy.KL0ZPB	;ZH16_S2_vs_ZH6_S2;ZH16_S3_vs_ZH6_S3;ZH16_S4_vs_ZH6_S4	--	putative indole-3-acetic acid-amido synthetase GH3.9	2.82565	58.19	8.35552	5.08923	8.96119	12.5901	3.95809	2.22605
Novel00371	ZH16_S1_vs_ZH6_S1;ZH16_S2_vs_ZH6_S2;ZH16_S3_vs_ZH6_S3	--	Brefeldin A-inhibited guanine nucleotide-exchange protein 2 [Glycine soja]	6.48322	5.32514	2.79539	2.05907	1.78527	2.09132	1.2405	1.05032
Novel00558	ZH16_S1_vs_ZH6_S1;ZH16_S2_vs_ZH6_S2;ZH16_S4_vs_ZH6_S4	--	PREDICTED: uncharacterized protein LOC105958084 [Erythranthe guttatus]	0.852116	7.10471	1.93945	3.41361	0.142496	1.1917	0.465208	0.186906
arahy.VH1FI8	ZH16_S2_vs_ZH6_S2;ZH16_S3_vs_ZH6_S3;ZH16_S4_vs_ZH6_S4	--	Unknown protein	0.427609	3.01317	1.21826	1.57227	0.0689834	0.0462901	0	0
arahy.CBN6LR	ZH16_S2_vs_ZH6_S2;ZH16_S3_vs_ZH6_S3;ZH16_S4_vs_ZH6_S4	--	pentatricopeptide repeat-containing protein At4g16390, chloroplastic-like [Glycine max]	2.07549	10.2909	3.81381	3.3164	0.487532	0.334334	0.0440104	0.080123
Novel04497	ZH16_S2_vs_ZH6_S2;ZH16_S3_vs_ZH6_S3;ZH16_S4_vs_ZH6_S4	--	--	0.538668	2.78739	1.70524	1.87728	0.12699	0.0735462	0.0156322	0
Novel05052	ZH16_S2_vs_ZH6_S2;ZH16_S3_vs_ZH6_S3;ZH16_S4_vs_ZH6_S4	--	--	2.13216	9.56577	10.7126	8.95923	0.730721	0.451344	0.180328	0
arahy.0Q74GS	ZH16_S1_vs_ZH6_S1;ZH16_S2_vs_ZH6_S2;ZH16_S4_vs_ZH6_S4	--	protein CLEC16A-like isoform X2 [Glycine max]	2.09216	13.9045	1.97235	5.49376	0.0568118	0.253043	0.333343	0.14005
arahy.J1Z9L2	ZH16_S2_vs_ZH6_S2;ZH16_S3_vs_ZH6_S3;ZH16_S4_vs_ZH6_S4	--	tyrosine aminotransferase 3	0.356305	30.0913	4.30317	5.76571	0.370435	3.78328	0.478143	0.0560532
Novel03427	ZH16_S2_vs_ZH6_S2;ZH16_S3_vs_ZH6_S3;ZH16_S4_vs_ZH6_S4	--	PttB [Medicago truncatula]	0.489103	2.74665	1.39508	1.22972	0.127883	0.0740583	0.0817682	0
arahy.67M40U	ZH16_S2_vs_ZH6_S2;ZH16_S3_vs_ZH6_S3;ZH16_S4_vs_ZH6_S4	--	Unknown protein	0.997544	8.42645	2.03992	2.8021	0.277058	0.190671	0.0454695	0
Novel05019	ZH16_S2_vs_ZH6_S2;ZH16_S3_vs_ZH6_S3;ZH16_S4_vs_ZH6_S4	--	PREDICTED: uncharacterized protein LOC105852070 [Cicer arietinum]	3.95165	3.78326	10.284	9.47979	0.613805	0	0.0714894	0
Novel01773	ZH16_S2_vs_ZH6_S2;ZH16_S3_vs_ZH6_S3;ZH16_S4_vs_ZH6_S4	--	hypothetical protein ARAX_AHF417E07-001 [Arachis hypogaea]	0.446146	1.03851	1.58325	1.68995	0.0690525	0	0	0
arahy.3RQC98	ZH16_S1_vs_ZH6_S1;ZH16_S2_vs_ZH6_S2;ZH16_S3_vs_ZH6_S3	--	Myb/SANT-like DNA-binding domain protein	4.8609	7.40011	1.51414	1.58891	0.490954	0.369486	0.0360439	0.0656195
arahy.49KH4I	ZH16_S2_vs_ZH6_S2;ZH16_S3_vs_ZH6_S3;ZH16_S4_vs_ZH6_S4	--	F-box protein interaction domain protein	1.12192	6.57618	3.15739	2.65911	0.330098	0.065149	0	0
arahy.DR45AA	ZH16_S2_vs_ZH6_S2;ZH16_S3_vs_ZH6_S3;ZH16_S4_vs_ZH6_S4	--	receptor-like protein kinase 2	1.22602	10.6811	6.48118	4.40753	0.614423	0.159591	0.103057	0
Novel02215	ZH16_S2_vs_ZH6_S2;ZH16_S3_vs_ZH6_S3;ZH16_S4_vs_ZH6_S4	--	--	3.79903	7.21044	3.21841	2.40726	0.720667	0.875901	0.185857	0
arahy.IG0W9M	ZH16_S1_vs_ZH6_S1;ZH16_S2_vs_ZH6_S2;ZH16_S4_vs_ZH6_S4	--	40S ribosomal protein S14-like [Glycine max]	3.18129	6.02983	1.3217	2.35329	0.283059	0.321079	0.140528	0
arahy.9V0GTC	ZH16_S2_vs_ZH6_S2;ZH16_S3_vs_ZH6_S3;ZH16_S4_vs_ZH6_S4	--	Unknown protein	17.2474	25.0074	9.92594	14.1404	7.45922	1.97908	0.413655	0.129102
Novel05060	ZH16_S1_vs_ZH6_S1;ZH16_S2_vs_ZH6_S2;ZH16_S3_vs_ZH6_S3	--	PREDICTED: uncharacterized protein LOC101515413 isoform X1 [Cicer arietinum]	4.15829	14.3445	6.65746	4.81158	1.33888	5.44496	2.59113	2.1348
arahy.VPK6PF	ZH16_S2_vs_ZH6_S2;ZH16_S3_vs_ZH6_S3;ZH16_S4_vs_ZH6_S4	--	receptor-like protein kinase 2	7.22301	41.8079	21.0056	28.6536	1.37652	0.452987	0.273356	0
Novel01332	ZH16_S2_vs_ZH6_S2;ZH16_S3_vs_ZH6_S3;ZH16_S4_vs_ZH6_S4	--	--	1.18688	3.0796	3.5186	4.30592	0.510339	0.17068	0.069579	0
arahy.6MQ181	ZH16_S1_vs_ZH6_S1;ZH16_S2_vs_ZH6_S2;ZH16_S3_vs_ZH6_S3	--	UDP-glucuronic acid decarboxylase 3	4.69092	12.0871	3.70204	0.910343	0.58347	1.90002	0.49868	0.436615
Novel04537	ZH16_S2_vs_ZH6_S2;ZH16_S3_vs_ZH6_S3;ZH16_S4_vs_ZH6_S4	--	--	5.52755	28.2921	52.4074	45.6742	1.27877	0.961138	0.707221	0.081003
Novel00369	ZH16_S1_vs_ZH6_S1;ZH16_S2_vs_ZH6_S2;ZH16_S3_vs_ZH6_S3	--	PREDICTED: ankyrin repeat and SAM domain-containing protein 6-like [Glycine max]	0.990171	2.98575	0.567236	0.835574	0.0622766	0.133097	0	0.0383804
arahy.Y11EX9	ZH16_S1_vs_ZH6_S1;ZH16_S2_vs_ZH6_S2;ZH16_S3_vs_ZH6_S3	--	dolichol phosphate-mannose biosynthesis regulatory protein-related	4.74911	7.54413	2.05826	2.68523	0.127737	0.267872	0	0
arahy.ZV83LZ	ZH16_S2_vs_ZH6_S2;ZH16_S3_vs_ZH6_S3;ZH16_S4_vs_ZH6_S4	--	RNA binding (RRM/RBD/RNP motifs) family protein	44.675	225.823	99.6191	58.2108	20.3756	5.23171	2.40726	0.103397
Novel03767	ZH16_S2_vs_ZH6_S2;ZH16_S3_vs_ZH6_S3;ZH16_S4_vs_ZH6_S4	--	--	0.969581	6.90064	3.01764	1.53182	0.223532	0.0317345	0	0
arahy.985SC4	ZH16_S1_vs_ZH6_S1;ZH16_S2_vs_ZH6_S2;ZH16_S3_vs_ZH6_S3	--	probable 2-oxoglutarate/Fe(II)-dependent dioxygenase-like [Glycine max]	25.7089	7.65087	1.58134	0.476216	2.60343	0.0613005	0.0230946	0.0420448
arahy.Z1GLJH	;ZH16_S2_vs_ZH6_S2;ZH16_S3_vs_ZH6_S3;ZH16_S4_vs_ZH6_S4	--	Protein kinase superfamily protein	1.63872	16.6311	3.3495	1.29439	5.51971	4.15593	1.32603	0.290122
Novel03333	ZH16_S2_vs_ZH6_S2;ZH16_S3_vs_ZH6_S3;ZH16_S4_vs_ZH6_S4	--	hypothetical protein PHAVU_005G065500g [Phaseolus vulgaris]>gi|561022646|gb|ESW21376.1| hypothetical protein PHAVU_005G065500g [Phaseolus vulgaris]	0.506385	2.73858	1.48854	1.23964	0.0468283	0.155264	0	0
Novel02301	ZH16_S1_vs_ZH6_S1;ZH16_S2_vs_ZH6_S2;ZH16_S4_vs_ZH6_S4	--	hypothetical protein PHAVU_003G101400g [Phaseolus vulgaris]>gi|561027586|gb|ESW26226.1| hypothetical protein PHAVU_003G101400g [Phaseolus vulgaris]	1.7747	3.00329	0.819884	1.48374	0.0199641	0.0510169	0.0720812	0
Novel03295	ZH16_S2_vs_ZH6_S2;ZH16_S3_vs_ZH6_S3;ZH16_S4_vs_ZH6_S4	--	--	0.390721	2.32754	1.27508	1.45998	0.111651	0.108389	0	0
Novel01098	ZH16_S2_vs_ZH6_S2;ZH16_S3_vs_ZH6_S3;ZH16_S4_vs_ZH6_S4	--	hypothetical protein VITISV_004513 [Vitis vinifera]	0.296555	4.61199	1.28428	3.26555	0.116412	0.0604596	0.0262717	0
arahy.1KZS2F	ZH16_S2_vs_ZH6_S2;ZH16_S3_vs_ZH6_S3;ZH16_S4_vs_ZH6_S4	--	Unknown protein	0.662016	150.622	18.9014	6.27296	0.349516	5.6335	0.315514	0
Novel05005	ZH16_S1_vs_ZH6_S1;ZH16_S2_vs_ZH6_S2;ZH16_S4_vs_ZH6_S4	--	--	4.38047	6.13184	2.57233	2.98381	0.747891	1.52567	1.02446	0.598779
Novel03589	ZH16_S2_vs_ZH6_S2;ZH16_S3_vs_ZH6_S3;ZH16_S4_vs_ZH6_S4	TF	transcription factor Myb1 [Arachis hypogaea]	0.448643	4.52943	2.03541	3.157	0.248625	0.507016	0.0561095	0.0621208
Novel00590	ZH16_S1_vs_ZH6_S1;ZH16_S2_vs_ZH6_S2;ZH16_S3_vs_ZH6_S3	FAR1	FAR1 DNA-binding domain protein [Medicago truncatula]	4.31487	7.30698	3.25753	2.45699	0.461267	0.430635	0.324091	0.750625
Novel02272	ZH16_S2_vs_ZH6_S2;ZH16_S3_vs_ZH6_S3;ZH16_S4_vs_ZH6_S4	--	Oligoribonuclease [Medicago truncatula]	1.20329	4.53243	2.40521	2.85691	0.271268	0.0447231	0.0552923	0
Novel01337	ZH16_S2_vs_ZH6_S2;ZH16_S3_vs_ZH6_S3;ZH16_S4_vs_ZH6_S4	--	--	0.105291	3.33241	0.835482	1.28377	0.0151296	0	0.0102433	0
arahy.G8MIGD	ZH16_S1_vs_ZH6_S1;ZH16_S2_vs_ZH6_S2;ZH16_S4_vs_ZH6_S4	--	40S ribosomal protein S13 [Glycine max]	7.14164	23.8408	7.38381	7.31202	2.85271	8.76306	5.47003	1.93541
arahy.C2RQ35	ZH16_S2_vs_ZH6_S2;ZH16_S3_vs_ZH6_S3;ZH16_S4_vs_ZH6_S4	--	F-box and associated interaction domains-containing protein	0.16644	2.42812	2.25748	2.05327	0.0133907	0.400306	0.187355	0.159254
arahy.908IX6	ZH16_S2_vs_ZH6_S2;ZH16_S3_vs_ZH6_S3;ZH16_S4_vs_ZH6_S4	--	disease resistance protein (TIR-NBS-LRR class), putative	0.249628	1.84393	1.2909	2.88182	0.139589	0	0.0145395	0
Novel04867	ZH16_S2_vs_ZH6_S2;ZH16_S3_vs_ZH6_S3;ZH16_S4_vs_ZH6_S4	--	proteinase inhibitor [Trifolium repens]	4.9171	4.39719	4.18279	2.63123	1.2222	0.222697	0.0295527	0
arahy.FJUP9F	ZH16_S2_vs_ZH6_S2;ZH16_S3_vs_ZH6_S3;ZH16_S4_vs_ZH6_S4	--	Bifunctional dihydrofolate reductase/thymidylate synthase	1.78019	10.6992	3.61706	2.09688	0.69675	1.14472	0.202103	0
arahy.P0DSY3	ZH16_S2_vs_ZH6_S2;ZH16_S3_vs_ZH6_S3;ZH16_S4_vs_ZH6_S4	--	peptidyl-prolyl cis-trans isomerases	4.60966	9.18287	3.92357	5.63615	2.40014	4.41744	1.45299	1.37971
Novel03608	ZH16_S2_vs_ZH6_S2;ZH16_S3_vs_ZH6_S3;ZH16_S4_vs_ZH6_S4	--	--	2.09371	2.21635	4.18427	3.96782	0.502429	0.147451	0.0261665	0
arahy.L6QVD1	ZH16_S2_vs_ZH6_S2;ZH16_S3_vs_ZH6_S3;ZH16_S4_vs_ZH6_S4	--	Fatty acid hydroxylase superfamily	17.3269	7.9062	6.18832	5.1085	2.64736	0.332475	0.155797	0.0386801
arahy.HFSF7Z	ZH16_S2_vs_ZH6_S2;ZH16_S3_vs_ZH6_S3;ZH16_S4_vs_ZH6_S4	--	Disease resistance protein (TIR-NBS-LRR class) family	0.0135724	1.57374	0.492272	0.700623	0.120852	0.0458609	0	0
arahy.4ER605	ZH16_S1_vs_ZH6_S1;ZH16_S2_vs_ZH6_S2;ZH16_S4_vs_ZH6_S4	G2-like	myb-like protein X-like [Glycine max]	1.69023	2.71966	1.01059	2.15459	0.22031	0.0783115	0.145834	0
arahy.DZ6NU9	ZH16_S1_vs_ZH6_S1;ZH16_S2_vs_ZH6_S2;ZH16_S4_vs_ZH6_S4	--	receptor-like cytosolic serine/threonine-protein kinase RBK2-like [Glycine max]	11.1778	74.5619	5.96989	9.14457	1.26917	0.905688	0.418663	0
arahy.3679BT	ZH16_S1_vs_ZH6_S1;ZH16_S2_vs_ZH6_S2;ZH16_S3_vs_ZH6_S3	--	Unknown protein	5.0564	16.6713	2.50327	1.99478	0	0	0	0
Novel03740	ZH16_S2_vs_ZH6_S2;ZH16_S3_vs_ZH6_S3;ZH16_S4_vs_ZH6_S4	--	PREDICTED: uncharacterized protein LOC104109606 [Nicotiana tomentosiformis]	0.0951063	0.652175	2.3543	4.02141	0.0149421	0	0.114648	0
Novel03208	ZH16_S2_vs_ZH6_S2;ZH16_S3_vs_ZH6_S3;ZH16_S4_vs_ZH6_S4	--	--	0.156786	0.823218	4.3507	1.27319	0.0373901	0.0388379	0	0
Novel04456	ZH16_S2_vs_ZH6_S2;ZH16_S3_vs_ZH6_S3;ZH16_S4_vs_ZH6_S4	--	--	2.38393	8.07801	2.59696	4.87829	1.03585	2.70565	0.628577	0.828152
arahy.FSDJ4U	ZH16_S2_vs_ZH6_S2;ZH16_S3_vs_ZH6_S3;ZH16_S4_vs_ZH6_S4	--	ADP-ribosylation factor GTPase-activating protein AGD10	0.531472	9.98984	2.49995	4.43689	0.221855	0.454962	0.0787518	0.0477904
Novel00931	ZH16_S2_vs_ZH6_S2;ZH16_S3_vs_ZH6_S3;ZH16_S4_vs_ZH6_S4	--	--	0.0546789	38.391	12.7336	7.71736	0	0.324416	0	0
arahy.8HSJ02	ZH16_S2_vs_ZH6_S2;ZH16_S3_vs_ZH6_S3;ZH16_S4_vs_ZH6_S4	--	structural maintenance of chromosomes 2	1.59557	8.86269	4.36115	4.00256	0.207187	0.172168	0	0
arahy.09ZXWH	ZH16_S1_vs_ZH6_S1;ZH16_S3_vs_ZH6_S3;ZH16_S4_vs_ZH6_S4	--	heparan-alpha-glucosaminide N-acetyltransferase-like protein	3.08062	9.91407	4.75476	2.56628	1.02484	3.89287	1.24727	0.538585
Novel03713	ZH16_S2_vs_ZH6_S2;ZH16_S3_vs_ZH6_S3;ZH16_S4_vs_ZH6_S4	--	--	0.943135	1.41793	1.09984	3.01868	0.173003	0.0701386	0	0
arahy.TZU5V7	ZH16_S2_vs_ZH6_S2;ZH16_S3_vs_ZH6_S3;ZH16_S4_vs_ZH6_S4	--	ATP-binding ABC transporter	1.0855	3.90221	1.57588	0.970145	0.56366	0.759555	0.604702	0.269835
Novel04119	ZH16_S2_vs_ZH6_S2;ZH16_S3_vs_ZH6_S3;ZH16_S4_vs_ZH6_S4	--	PREDICTED: nucleolar protein 58 [Cicer arietinum]	1.65764	19.7643	7.93102	6.92275	0.509382	0.994323	0.192018	0.364508
arahy.WR5ZXB	ZH16_S1_vs_ZH6_S1;ZH16_S2_vs_ZH6_S2;ZH16_S4_vs_ZH6_S4	--	Unknown protein	10.0717	60.1975	21.7523	33.5123	3.26653	15.1401	9.51414	8.57561
arahy.B46INW	ZH16_S2_vs_ZH6_S2;ZH16_S3_vs_ZH6_S3;ZH16_S4_vs_ZH6_S4	--	Pentatricopeptide repeat (PPR) superfamily protein	0.0557771	1.93077	1.7529	1.94367	0.0256833	0.112849	0	0
arahy.79NX8T	ZH16_S1_vs_ZH6_S1;ZH16_S2_vs_ZH6_S2;ZH16_S3_vs_ZH6_S3	--	mannan endo-1,4-beta-mannosidase 6-like [Glycine max]	4.58869	1.67763	0.637598	0.0497177	0.847339	0.0754439	0	0.0598251
arahy.ES58RZ	ZH16_S1_vs_ZH6_S1;ZH16_S2_vs_ZH6_S2;ZH16_S3_vs_ZH6_S3	--	bromodomain and WD repeat-containing protein 3-like isoform X3 [Glycine max]	1.7139	12.2239	5.26525	2.65252	0.0643109	0.364746	0	0.158537
arahy.Q5GMA1	ZH16_S2_vs_ZH6_S2;ZH16_S3_vs_ZH6_S3;ZH16_S4_vs_ZH6_S4	--	ATP-dependent RNA helicase, putative	0.734013	4.36802	2.48551	2.19784	0.208051	0.0933154	0.0704294	0
arahy.QA2PAR	ZH16_S2_vs_ZH6_S2;ZH16_S3_vs_ZH6_S3;ZH16_S4_vs_ZH6_S4	--	protein PHYLLO, chloroplastic isoform X2 [Glycine max]	1.06006	13.579	3.42845	3.85788	0.218957	0.271167	0.268228	0
arahy.F9LVIV	ZH16_S2_vs_ZH6_S2;ZH16_S3_vs_ZH6_S3;ZH16_S4_vs_ZH6_S4	--	F-box and associated interaction domains-containing protein	0.900643	4.22257	1.49273	2.37589	0.271714	0.024036	0.195283	0
arahy.JSVJ2H	ZH16_S2_vs_ZH6_S2;ZH16_S3_vs_ZH6_S3;ZH16_S4_vs_ZH6_S4	--	sterol 3-beta-glucosyltransferase UGT80A2-like isoform X4 [Glycine max]	0.13551	1.54438	0.4521	1.66656	0.0232337	0.0269098	0	0.0286374
Novel02918	ZH16_S1_vs_ZH6_S1;ZH16_S2_vs_ZH6_S2;ZH16_S4_vs_ZH6_S4	--	--	1.17067	1.42004	0.606206	1.27192	0.118604	0.106526	0.347576	0
arahy.RXWW1P	ZH16_S1_vs_ZH6_S1;ZH16_S2_vs_ZH6_S2;ZH16_S4_vs_ZH6_S4	--	uncharacterized protein LOC102661770 isoform X2 [Glycine max]	3.32937	4.37103	1.51551	2.29493	0.26405	0	0.0397272	0
Novel02615	ZH16_S2_vs_ZH6_S2;ZH16_S3_vs_ZH6_S3;ZH16_S4_vs_ZH6_S4	--	HGWP repeat containing protein-like protein [Medicago truncatula]	0.0720962	0.983063	1.18209	1.38297	0.0123611	0.0572677	0.133904	0.116538
arahy.36H6QC	ZH16_S1_vs_ZH6_S1;ZH16_S2_vs_ZH6_S2;ZH16_S3_vs_ZH6_S3	--	Transmembrane amino acid transporter family protein	18.8011	4.57833	2.03048	0.477842	2.24757	0.10459	0.0688577	0.0313396
Novel02245	ZH16_S2_vs_ZH6_S2;ZH16_S3_vs_ZH6_S3;ZH16_S4_vs_ZH6_S4	--	--	0.422244	4.39068	2.81731	4.50836	0.0565122	0.0753295	0.0701405	0
arahy.8P5MU3	ZH16_S2_vs_ZH6_S2;ZH16_S3_vs_ZH6_S3;ZH16_S4_vs_ZH6_S4	--	uncharacterized protein LOC100782590 isoform X2 [Glycine max]	1.72154	8.84068	5.01134	4.34868	0.410956	0.237997	0.107381	0
Novel02872	ZH16_S2_vs_ZH6_S2;ZH16_S3_vs_ZH6_S3;ZH16_S4_vs_ZH6_S4	--	--	0.740701	2.76254	3.56656	3.45218	0.326882	0.0925964	0.0928923	0
Novel04511	ZH16_S2_vs_ZH6_S2;ZH16_S3_vs_ZH6_S3;ZH16_S4_vs_ZH6_S4	--	--	1.60593	4.29482	2.73644	2.52524	0.328923	0.153733	0	0
arahy.SB0HK4	ZH16_S2_vs_ZH6_S2;ZH16_S3_vs_ZH6_S3;ZH16_S4_vs_ZH6_S4	--	replication protein A 70 kDa DNA-binding subunit C-like [Glycine max]	0.893847	13.944	4.02754	4.7881	0.630047	4.02121	1.1219	1.22479
arahy.NH2PDE	ZH16_S1_vs_ZH6_S1;ZH16_S2_vs_ZH6_S2;ZH16_S3_vs_ZH6_S3	--	Translocon-associated family protein n=1 Tax=Populus trichocarpa RepID=A9PFV9_POPTR	6.30082	12.5547	6.43383	7.75547	1.34578	2.48404	1.85668	2.82935
arahy.IS52SX	ZH16_S2_vs_ZH6_S2;ZH16_S3_vs_ZH6_S3;ZH16_S4_vs_ZH6_S4	--	probable ADP-ribosylation factor GTPase-activating protein AGD15-like isoform X2 [Glycine max]	0.391692	0.664136	1.03552	2.93687	0.0472411	0	0	0.0582285
arahy.J5PUD3	ZH16_S1_vs_ZH6_S1;ZH16_S3_vs_ZH6_S3;ZH16_S4_vs_ZH6_S4	--	P-loop containing nucleoside triphosphate hydrolases superfamily protein	5.30111	1.46678	2.38701	1.48202	0.343391	0.143501	0	0
Novel01436	ZH16_S2_vs_ZH6_S2;ZH16_S3_vs_ZH6_S3;ZH16_S4_vs_ZH6_S4	--	--	3.65436	7.47867	12.5332	10.908	0.650544	0	0.178267	0
arahy.PGFD37	ZH16_S1_vs_ZH6_S1;ZH16_S2_vs_ZH6_S2;ZH16_S4_vs_ZH6_S4	--	Unknown protein	15.1412	104.237	39.6473	63.0321	5.82388	28.7222	21.9929	21.2122
arahy.5EE15R	ZH16_S2_vs_ZH6_S2;ZH16_S3_vs_ZH6_S3;ZH16_S4_vs_ZH6_S4	--	actin cytoskeleton-regulatory complex protein pan1-like isoform X2 [Glycine max]	1.73685	12.7392	4.10904	5.85383	0.548996	0.0975741	0.0300697	0
Novel01806	ZH16_S2_vs_ZH6_S2;ZH16_S3_vs_ZH6_S3;ZH16_S4_vs_ZH6_S4	--	--	6.38572	9.02071	9.56407	5.86019	1.17051	0	0.100192	0
Novel01168	ZH16_S2_vs_ZH6_S2;ZH16_S3_vs_ZH6_S3;ZH16_S4_vs_ZH6_S4	--	--	0.328624	4.8547	1.92379	2.88815	0.188322	0.123404	0.0262295	0
Novel03472	ZH16_S2_vs_ZH6_S2;ZH16_S3_vs_ZH6_S3;ZH16_S4_vs_ZH6_S4	--	--	22.3827	30.4748	81.1867	74.7744	2.69516	0.49074	0.864961	0.0530815
Novel03791	ZH16_S2_vs_ZH6_S2;ZH16_S3_vs_ZH6_S3;ZH16_S4_vs_ZH6_S4	--	PREDICTED: uncharacterized protein LOC104109606 [Nicotiana tomentosiformis]	63.4884	159.796	35.8969	111.308	5.80287	0.323582	0.8942	1.45874
Novel00562	ZH16_S2_vs_ZH6_S2;ZH16_S3_vs_ZH6_S3;ZH16_S4_vs_ZH6_S4	--	--	0.14967	2.3087	3.57237	3.2467	0.395354	0	0	0
Novel03925	ZH16_S2_vs_ZH6_S2;ZH16_S3_vs_ZH6_S3;ZH16_S4_vs_ZH6_S4	--	--	2.26199	7.49473	2.9868	3.99145	0.498652	0	0	0
arahy.G8A5JV	ZH16_S1_vs_ZH6_S1;ZH16_S2_vs_ZH6_S2;ZH16_S3_vs_ZH6_S3	--	nucleoporin NUP188 homolog isoform X1 [Glycine max]	6.62053	6.68028	1.80974	2.14129	0.360778	0.334198	0	0.466881
arahy.Y2HGKC	ZH16_S1_vs_ZH6_S1;ZH16_S2_vs_ZH6_S2;ZH16_S3_vs_ZH6_S3	--	LRR and NB-ARC domain disease resistance protein	1.56713	1.08532	0.99961	0.895175	0.281107	0.0104278	0.0294667	0.0402378
Novel04318	ZH16_S2_vs_ZH6_S2;ZH16_S3_vs_ZH6_S3;ZH16_S4_vs_ZH6_S4	--	--	0.379189	4.30282	1.9337	2.22459	0.147728	0.304659	0.177805	0.0910433
Novel01096	ZH16_S2_vs_ZH6_S2;ZH16_S3_vs_ZH6_S3;ZH16_S4_vs_ZH6_S4	--	hypothetical protein ARAX_AHF417E07-001 [Arachis hypogaea]	2.0671	2.6424	3.96561	4.23141	0.607663	0.504225	0.504284	0.204431
arahy.F4LE79	ZH16_S2_vs_ZH6_S2;ZH16_S3_vs_ZH6_S3;ZH16_S4_vs_ZH6_S4	--	60S ribosome subunit biogenesis NIP7-like protein	6.68288	31.3945	34.9707	20.0944	4.72257	1.43197	1.27372	0
arahy.DXY4C3	ZH16_S2_vs_ZH6_S2;ZH16_S3_vs_ZH6_S3;ZH16_S4_vs_ZH6_S4	--	copper ion-binding laccase, putative	0.0604491	0.949844	1.66154	1.04208	0	0	0.060736	0
Novel01141	ZH16_S1_vs_ZH6_S1;ZH16_S3_vs_ZH6_S3;ZH16_S4_vs_ZH6_S4	--	--	1.01559	0	1.05212	6.67619	0.0290212	0.547192	0	0
arahy.C83F23	ZH16_S2_vs_ZH6_S2;ZH16_S3_vs_ZH6_S3;ZH16_S4_vs_ZH6_S4	--	ribosomal protein S1	3.62598	7.3551	2.94523	4.01982	0.929832	0.268498	0.159867	0.0363839
Novel03435	ZH16_S2_vs_ZH6_S2;ZH16_S3_vs_ZH6_S3;ZH16_S4_vs_ZH6_S4	--	Natural resistance-associated macrophage protein [Medicago truncatula]	0.502648	3.24839	1.57167	4.86339	0.120784	0.0418204	0	0
arahy.FSGN1A	ZH16_S2_vs_ZH6_S2;ZH16_S3_vs_ZH6_S3;ZH16_S4_vs_ZH6_S4	--	Unknown protein	0.652062	16.8553	7.25716	10.1294	0.291969	0.429146	0.237209	0.563161
arahy.1LT7X4	ZH16_S2_vs_ZH6_S2;ZH16_S3_vs_ZH6_S3;ZH16_S4_vs_ZH6_S4	TF	AP2-like ethylene-responsive transcription factor ANT-like isoform X5 [Glycine max]	1.65597	16.4688	5.86356	9.0602	0.324148	0.562015	0.0877843	0.159815
Novel01448	ZH16_S2_vs_ZH6_S2;ZH16_S3_vs_ZH6_S3;ZH16_S4_vs_ZH6_S4	--	retrotransposon gag protein [Arachis hypogaea]	0.598512	12.4806	6.343	8.5494	0.243101	2.25676	1.66957	0.970795
arahy.FV4QAS	ZH16_S2_vs_ZH6_S2;ZH16_S3_vs_ZH6_S3;ZH16_S4_vs_ZH6_S4	--	tRNA (adenine(58)-N(1))-methyltransferase catalytic subunit trmt61a-like isoform X2 [Glycine max]	0.575705	2.09748	4.3425	2.7431	0	0.107639	0.167773	0
Novel02782	ZH16_S2_vs_ZH6_S2;ZH16_S3_vs_ZH6_S3;ZH16_S4_vs_ZH6_S4	--	--	6.84357	21.3386	78.2327	62.1937	1.91065	0.0809943	0.258716	0
arahy.1L7GT4	ZH16_S2_vs_ZH6_S2;ZH16_S3_vs_ZH6_S3;ZH16_S4_vs_ZH6_S4	--	nucleotide binding	7.04671	18.2284	9.19306	5.58151	3.74933	5.63826	2.76596	1.75224
arahy.QBCT0C	ZH16_S2_vs_ZH6_S2;ZH16_S3_vs_ZH6_S3;ZH16_S4_vs_ZH6_S4	--	isoflavone reductase homolog [Glycine max]	0.350714	4.01664	2.98099	2.22255	0.222615	0.0256928	0	0
arahy.UA9ND9	ZH16_S1_vs_ZH6_S1;ZH16_S2_vs_ZH6_S2;ZH16_S3_vs_ZH6_S3	--	aldo/keto reductase family oxidoreductase	20.6962	3.12669	2.16961	1.02664	4.44501	0.276205	0.153874	2.02701
Novel02415	ZH16_S1_vs_ZH6_S1;ZH16_S2_vs_ZH6_S2;ZH16_S4_vs_ZH6_S4	--	hypothetical protein PHAVU_003G114400g [Phaseolus vulgaris]>gi|561027734|gb|ESW26374.1| hypothetical protein PHAVU_003G114400g [Phaseolus vulgaris]	0.598549	3.1888	0.174944	1.66192	0	0.0316514	0	0
arahy.X568GS	ZH16_S2_vs_ZH6_S2;ZH16_S3_vs_ZH6_S3;ZH16_S4_vs_ZH6_S4	--	Ulp1 protease family, carboxy-terminal domain protein	0.0433195	1.29245	1.30182	0.726032	0.0591673	0	0	0
arahy.ZU2PF6	ZH16_S1_vs_ZH6_S1;ZH16_S2_vs_ZH6_S2;ZH16_S4_vs_ZH6_S4	--	Unknown protein	6.4309	2.2309	2.88495	4.52608	0.730475	0.0796233	0.0843818	0
Novel00759	ZH16_S1_vs_ZH6_S1;ZH16_S2_vs_ZH6_S2;ZH16_S3_vs_ZH6_S3	--	PREDICTED: zinc finger BED domain-containing protein RICESLEEPER 2-like [Cicer arietinum]	2.4764	3.71297	1.25104	1.1959	0.245316	0.436164	0.207284	0.293075
arahy.215SB7	ZH16_S1_vs_ZH6_S1;ZH16_S2_vs_ZH6_S2;ZH16_S3_vs_ZH6_S3	--	ATP binding	0.810536	0.969841	0.439464	0.143042	0.0620496	0.0479114	0	0
Novel02329	ZH16_S2_vs_ZH6_S2;ZH16_S3_vs_ZH6_S3;ZH16_S4_vs_ZH6_S4	--	--	5.12807	8.4888	11.4352	10.0638	2.11549	0.0488313	0.0636564	0
arahy.7WY41H	ZH16_S2_vs_ZH6_S2;ZH16_S3_vs_ZH6_S3;ZH16_S4_vs_ZH6_S4	TF	transcription factor BIM1-like isoform X2 [Glycine max]	7.47118	12.7383	3.59722	2.46016	1.31631	0.182145	0.148524	0
Novel03794	ZH16_S2_vs_ZH6_S2;ZH16_S3_vs_ZH6_S3;ZH16_S4_vs_ZH6_S4	--	--	0.206515	2.30949	1.24285	2.2886	0.0282066	0	0	0
arahy.UA0Z8F	ZH16_S1_vs_ZH6_S1;ZH16_S2_vs_ZH6_S2;ZH16_S4_vs_ZH6_S4	--	Unknown protein	2.19089	4.46228	1.08979	2.71241	0.0855199	0.173357	0.366674	0
arahy.N7S79M	ZH16_S2_vs_ZH6_S2;ZH16_S3_vs_ZH6_S3;ZH16_S4_vs_ZH6_S4	--	hydroxymethylglutaryl-CoA lyase	2.70574	12.4702	7.63608	10.7668	0.629183	1.56071	0.775258	1.01172
Novel00310	ZH16_S2_vs_ZH6_S2;ZH16_S3_vs_ZH6_S3;ZH16_S4_vs_ZH6_S4	--	--	0.184132	1.95188	1.12777	1.80838	0.0717045	0.0911888	0.0485467	0
Novel03353	ZH16_S2_vs_ZH6_S2;ZH16_S3_vs_ZH6_S3;ZH16_S4_vs_ZH6_S4	--	ABC transporter-like protein, partial [Medicago truncatula]	1.23064	1.95834	2.43318	2.51711	0.291643	0.176542	0.141754	0.0553035
Novel01052	ZH16_S2_vs_ZH6_S2;ZH16_S3_vs_ZH6_S3;ZH16_S4_vs_ZH6_S4	--	PREDICTED: uncharacterized mitochondrial protein AtMg00810-like [Glycine max]	0.253352	266.42	19.5865	14.0476	0.0611213	2.31495	0.364847	0
arahy.5YJ9DX	ZH16_S1_vs_ZH6_S1;ZH16_S2_vs_ZH6_S2;ZH16_S3_vs_ZH6_S3	--	serine carboxypeptidase-like 29	41.8513	21.694	6.64901	3.0511	18.8719	7.81433	3.30981	2.03345
arahy.0FR3XP	ZH16_S2_vs_ZH6_S2;ZH16_S3_vs_ZH6_S3;ZH16_S4_vs_ZH6_S4	--	Unknown protein	6.62877	17.1189	8.69504	10.1382	1.27208	0.368338	0.358854	0
Novel02273	ZH16_S1_vs_ZH6_S1;ZH16_S2_vs_ZH6_S2;ZH16_S3_vs_ZH6_S3	--	Ulp1 protease family, carboxy-terminal domain protein [Medicago truncatula]	2.9769	2.38275	3.01001	2.58323	1.12576	0.758978	0.574132	1.3352
Novel02971	ZH16_S2_vs_ZH6_S2;ZH16_S3_vs_ZH6_S3;ZH16_S4_vs_ZH6_S4	--	--	1.50403	7.69762	4.4545	5.63075	0.785172	0.816742	0.523717	0
arahy.V9ESQQ	ZH16_S2_vs_ZH6_S2;ZH16_S3_vs_ZH6_S3;ZH16_S4_vs_ZH6_S4	--	Unknown protein	1.9483	6.41305	5.80126	5.36081	0.737511	0.537634	0	0.165846
Novel02508	ZH16_S2_vs_ZH6_S2;ZH16_S3_vs_ZH6_S3;ZH16_S4_vs_ZH6_S4	--	PREDICTED: zinc finger BED domain-containing protein DAYSLEEPER-like [Vitis vinifera]	1.23848	8.25487	3.1337	2.93044	0.377358	1.4368	0.046452	0
arahy.15WA1E	ZH16_S2_vs_ZH6_S2;ZH16_S3_vs_ZH6_S3;ZH16_S4_vs_ZH6_S4	--	Pseudouridine synthase family protein	1.02256	5.6072	3.00211	3.09217	0.217267	0.352398	0.0653769	0
Novel03425	ZH16_S2_vs_ZH6_S2;ZH16_S3_vs_ZH6_S3;ZH16_S4_vs_ZH6_S4	--	--	1.26387	7.26859	3.2305	4.26448	0.613302	0.252072	0.151798	0
arahy.H8IAYR	ZH16_S2_vs_ZH6_S2;ZH16_S3_vs_ZH6_S3;ZH16_S4_vs_ZH6_S4	--	Oxidoreductase family protein	0	39.0016	10.1287	3.50263	0.0922241	15.3267	3.00386	0.0378912
Novel05003	ZH16_S1_vs_ZH6_S1;ZH16_S3_vs_ZH6_S3;ZH16_S4_vs_ZH6_S4	AUX/IAA	hypothetical protein CISIN_1g0204932mg [Citrus sinensis]	3.91588	8.60537	4.68506	6.13951	0.458214	1.66816	0.592486	0
Novel04482	ZH16_S2_vs_ZH6_S2;ZH16_S3_vs_ZH6_S3;ZH16_S4_vs_ZH6_S4	--	Ulp1 protease family, carboxy-terminal domain protein [Medicago truncatula]	0.619011	5.40618	0.775808	0.756513	0.178743	0	0.0186179	0
arahy.6MF5PG	ZH16_S1_vs_ZH6_S1;ZH16_S2_vs_ZH6_S2;ZH16_S3_vs_ZH6_S3	--	mitochondrial substrate carrier family protein C-like [Glycine max]	8.74788	1.74986	1.1799	0.877957	1.0248	0	0.0970455	0.0278983
Novel01099	ZH16_S2_vs_ZH6_S2;ZH16_S3_vs_ZH6_S3;ZH16_S4_vs_ZH6_S4	--	PREDICTED: coatomer subunit beta'-2-like [Tarenaya hassleriana]	0.275739	5.214	2.28807	3.17971	0.0803619	0.0603522	0.0326449	0.286721
arahy.PNM9T4	ZH16_S1_vs_ZH6_S1;ZH16_S2_vs_ZH6_S2;ZH16_S3_vs_ZH6_S3	--	Methionine S-adenosyl transferase n=1 Tax=Detonula confervacea RepID=B9ZZX3_DETCO	28.9138	2.18796	1.69734	0.484003	6.94748	0.730214	0.61473	0.230203
arahy.PP9WHI	ZH16_S2_vs_ZH6_S2;ZH16_S3_vs_ZH6_S3;ZH16_S4_vs_ZH6_S4	--	unknown protein	1.56257	3.91273	2.37588	1.93355	0.366949	0.124458	0.0792303	0
Novel03656	ZH16_S2_vs_ZH6_S2;ZH16_S3_vs_ZH6_S3;ZH16_S4_vs_ZH6_S4	--	Ulp1 protease family, carboxy-terminal domain protein [Medicago truncatula]	3.41993	13.4936	10.1823	11.6193	0.853609	0.408446	0.0467011	0.0387783
Novel00282	ZH16_S2_vs_ZH6_S2;ZH16_S3_vs_ZH6_S3;ZH16_S4_vs_ZH6_S4	--	--	4.58904	8.58779	8.80235	7.46437	1.14841	0.189335	0.0501624	0
Novel03536	ZH16_S2_vs_ZH6_S2;ZH16_S3_vs_ZH6_S3;ZH16_S4_vs_ZH6_S4	--	hypothetical protein 205D04_20 [Arachis hypogaea]	0.037498	1.1213	2.55467	2.44073	0.019679	0.0579806	0	0
arahy.D41UNS	ZH16_S1_vs_ZH6_S1;ZH16_S3_vs_ZH6_S3;ZH16_S4_vs_ZH6_S4	PHD	Inhibitor of growth proteins histone-binding protein n=4 Tax=Musca domestica RepID=T1P9R5_MUSDO	7.63982	5.58395	5.54052	3.29928	1.12843	3.59776	1.28194	0.966277
Novel02148	ZH16_S2_vs_ZH6_S2;ZH16_S3_vs_ZH6_S3;ZH16_S4_vs_ZH6_S4	--	PREDICTED: sucrose synthase 6-like [Glycine max]	0.232114	3.89108	0.964086	0.61808	0.0106805	0.0987712	0.0867735	0
arahy.FD4NWC	ZH16_S2_vs_ZH6_S2;ZH16_S3_vs_ZH6_S3;ZH16_S4_vs_ZH6_S4	--	ATP-dependent RNA helicase, putative	0.449711	0.555419	1.06234	1.52236	0.0297552	0	0	0.0669112
arahy.X62M7H	ZH16_S2_vs_ZH6_S2;ZH16_S3_vs_ZH6_S3;ZH16_S4_vs_ZH6_S4	--	Pentatricopeptide repeat (PPR) superfamily protein	0.657099	7.98282	4.12609	1.94603	0.756087	0.190374	0.104234	0
arahy.A8QM82	ZH16_S2_vs_ZH6_S2;ZH16_S3_vs_ZH6_S3;ZH16_S4_vs_ZH6_S4	--	FUNCTIONS IN: molecular_function unknown	0.207466	5.10296	2.31521	2.92607	0.235904	0.147138	0.0245717	0
Novel04398	ZH16_S2_vs_ZH6_S2;ZH16_S3_vs_ZH6_S3;ZH16_S4_vs_ZH6_S4	--	Elongation factor 1-alpha [Medicago truncatula]	0.520895	2.1806	1.55432	0.516442	0.0885013	0.0183856	0.0239675	0
arahy.78LW43	ZH16_S2_vs_ZH6_S2;ZH16_S3_vs_ZH6_S3;ZH16_S4_vs_ZH6_S4	--	protein PHYLLO, chloroplastic isoform X2 [Glycine max]	3.90285	19.4769	9.4899	9.29376	0.8518	0.437031	0.0720877	0
Novel05038	ZH16_S1_vs_ZH6_S1;ZH16_S3_vs_ZH6_S3;ZH16_S4_vs_ZH6_S4	--	--	7.80529	8.04221	8.17612	6.54491	0.899873	1.08963	0.324916	0
arahy.B47L6X	ZH16_S2_vs_ZH6_S2;ZH16_S3_vs_ZH6_S3;ZH16_S4_vs_ZH6_S4	--	Zinc finger (C3HC4-type RING finger) family protein	5.43167	22.4261	14.266	7.31552	4.46688	7.46064	3.4625	2.472
Novel00102	ZH16_S2_vs_ZH6_S2;ZH16_S3_vs_ZH6_S3;ZH16_S4_vs_ZH6_S4	--	--	8.12276	7.68658	13.2951	5.84268	1.52391	0	0.276512	0
Novel01163	ZH16_S2_vs_ZH6_S2;ZH16_S3_vs_ZH6_S3;ZH16_S4_vs_ZH6_S4	--	PREDICTED: uncharacterized protein LOC101515413 isoform X2 [Cicer arietinum]	1.33438	7.4855	3.7142	4.4951	0.647214	0.095956	0.306129	0.0847367
arahy.B3D4NA	ZH16_S2_vs_ZH6_S2;ZH16_S3_vs_ZH6_S3;ZH16_S4_vs_ZH6_S4	--	zinc-binding alcohol dehydrogenase family protein	1.14271	13.3421	5.1534	4.70138	0.532591	0.214914	0.202371	0
arahy.7417N6	ZH16_S2_vs_ZH6_S2;ZH16_S3_vs_ZH6_S3;ZH16_S4_vs_ZH6_S4	--	uncharacterized protein LOC100779146 [Glycine max]	2.81179	6.66029	3.81329	2.62848	0.582265	0.250959	0.0672262	0
arahy.U3A0V6	ZH16_S2_vs_ZH6_S2;ZH16_S3_vs_ZH6_S3;ZH16_S4_vs_ZH6_S4	--	Pentatricopeptide repeat (PPR) superfamily protein	0.638113	6.22481	2.37482	1.94299	0.350828	0.233251	0.0408607	0
arahy.YA5RRX	ZH16_S1_vs_ZH6_S1;ZH16_S3_vs_ZH6_S3;ZH16_S4_vs_ZH6_S4	--	cyclic nucleotide-gated channel 14	22.5906	23.5681	72.8918	47.3197	8.59801	13.3473	7.20725	4.89325
Novel01252	ZH16_S2_vs_ZH6_S2;ZH16_S3_vs_ZH6_S3;ZH16_S4_vs_ZH6_S4	--	PREDICTED: uncharacterized protein LOC101498519 [Cicer arietinum]	0.0585214	3.4073	1.27907	0.776786	0.0827485	0.063894	0.0580959	0
arahy.S6WIDG	ZH16_S2_vs_ZH6_S2;ZH16_S3_vs_ZH6_S3;ZH16_S4_vs_ZH6_S4	--	UDP-Glycosyltransferase superfamily protein	0.0264611	3.36711	7.14939	4.46102	0	0.0412506	0.145714	0
arahy.40G96H	ZH16_S2_vs_ZH6_S2;ZH16_S3_vs_ZH6_S3;ZH16_S4_vs_ZH6_S4	--	ATP sulfurylase 1	0.246557	5.10789	11.6363	7.61571	0.559409	0.170863	0.135501	0
arahy.LA4UJ9	ZH16_S2_vs_ZH6_S2;ZH16_S3_vs_ZH6_S3;ZH16_S4_vs_ZH6_S4	--	HXXXD-type acyl-transferase family protein	0.0260943	1.79911	7.10974	1.92049	0.0955113	0.0330699	0.0790296	0
arahy.KKT884	ZH16_S2_vs_ZH6_S2;ZH16_S3_vs_ZH6_S3;ZH16_S4_vs_ZH6_S4	--	cycloartenol synthase 1	2.77846	23.9147	16.4183	20.7261	1.02242	0.455206	0.410415	0
Novel03545	ZH16_S1_vs_ZH6_S1;ZH16_S2_vs_ZH6_S2;ZH16_S4_vs_ZH6_S4	--	--	1.46798	2.29996	1.67399	2.10159	0.138402	0.0442098	0.218631	0
arahy.Y9RN7U	ZH16_S2_vs_ZH6_S2;ZH16_S3_vs_ZH6_S3;ZH16_S4_vs_ZH6_S4	--	disease resistance protein (CC-NBS-LRR class) family protein	0.0558954	0.336103	0.609763	1.34647	0	0.0326564	0	0
arahy.B386PI	ZH16_S2_vs_ZH6_S2;ZH16_S3_vs_ZH6_S3;ZH16_S4_vs_ZH6_S4	--	nucleolar MIF4G domain protein	3.26116	13.2487	7.13418	6.12202	1.43894	1.60218	0.968373	0.449689
Novel04196	ZH16_S1_vs_ZH6_S1;ZH16_S2_vs_ZH6_S2;ZH16_S3_vs_ZH6_S3	--	--	5.84816	2.2087	1.83696	1.30963	0.552472	0	0	0
Novel03239	ZH16_S1_vs_ZH6_S1;ZH16_S2_vs_ZH6_S2;ZH16_S4_vs_ZH6_S4	--	hypothetical protein PHAVU_002G224100g [Phaseolus vulgaris]>gi|561032689|gb|ESW31268.1| hypothetical protein PHAVU_002G224100g [Phaseolus vulgaris]	1.67546	7.03107	1.42044	21.2875	0	0.0755669	0.246273	0
Novel00834	ZH16_S2_vs_ZH6_S2;ZH16_S3_vs_ZH6_S3;ZH16_S4_vs_ZH6_S4	--	--	20.1727	13.2707	13.6774	18.7813	2.10932	0.0814353	0.190413	0
arahy.RY1LQQ	ZH16_S2_vs_ZH6_S2;ZH16_S3_vs_ZH6_S3;ZH16_S4_vs_ZH6_S4	ARF	auxin response factor 4	0.707966	7.16458	2.40599	2.4745	0.0846197	0.152068	0	0
Novel05065	ZH16_S2_vs_ZH6_S2;ZH16_S3_vs_ZH6_S3;ZH16_S4_vs_ZH6_S4	--	PREDICTED: uncharacterized protein LOC101508998 [Cicer arietinum]	0.661956	5.67592	2.0202	3.12794	0.157396	0	0.0473615	0
arahy.A1ITM9	ZH16_S2_vs_ZH6_S2;ZH16_S3_vs_ZH6_S3;ZH16_S4_vs_ZH6_S4	--	ATP-dependent caseinolytic (Clp) protease/crotonase family protein	2.17626	14.1933	3.62313	10.9965	0.489341	1.55262	0.173701	0.19231
arahy.UAI9RV	ZH16_S1_vs_ZH6_S1;ZH16_S2_vs_ZH6_S2;ZH16_S3_vs_ZH6_S3	--	26S proteasome non-ATPase regulatory subunit-like protein	7.94033	9.54528	4.31759	2.92378	2.33925	2.48893	0.953351	0.859115
Novel00912	ZH16_S2_vs_ZH6_S2;ZH16_S3_vs_ZH6_S3;ZH16_S4_vs_ZH6_S4	--	--	0.430104	2.40359	2.7334	2.94607	0.168868	0.0405984	0	0
Novel00951	ZH16_S2_vs_ZH6_S2;ZH16_S3_vs_ZH6_S3;ZH16_S4_vs_ZH6_S4	--	--	0.0739406	25.8536	2.88856	4.71011	0	0.46922	0.0820496	0
arahy.B1MMY3	ZH16_S2_vs_ZH6_S2;ZH16_S3_vs_ZH6_S3;ZH16_S4_vs_ZH6_S4	--	Unknown protein	4.01744	63.1413	19.2133	36.0565	1.63694	1.03351	1.12336	0.423141
Novel01001	ZH16_S2_vs_ZH6_S2;ZH16_S3_vs_ZH6_S3;ZH16_S4_vs_ZH6_S4	--	--	0.237485	1.58606	1.86823	1.70633	0.178401	0	0	0
arahy.RGR7TN	ZH16_S1_vs_ZH6_S1;ZH16_S2_vs_ZH6_S2;ZH16_S4_vs_ZH6_S4	--	Unknown protein	4.05496	13.0982	3.69755	11.1481	1.20573	1.90437	1.91715	1.79952
Novel01239	ZH16_S2_vs_ZH6_S2;ZH16_S3_vs_ZH6_S3;ZH16_S4_vs_ZH6_S4	--	PREDICTED: uncharacterized protein LOC100240883 [Vitis vinifera]>gi|296089711|emb|CBI39530.3| unnamed protein product [Vitis vinifera]	10.9923	17.5816	10.9519	15.2202	2.25143	0	0.356688	0
Novel03269	ZH16_S2_vs_ZH6_S2;ZH16_S3_vs_ZH6_S3;ZH16_S4_vs_ZH6_S4	--	PREDICTED: uncharacterized protein LOC105851608 [Cicer arietinum]	1.81775	6.31006	3.06421	2.09851	0.420098	0.137537	0.111804	0.0271405
arahy.D35N6W	ZH16_S1_vs_ZH6_S1;ZH16_S2_vs_ZH6_S2;ZH16_S4_vs_ZH6_S4	--	uncharacterized protein LOC100783850 isoform X2 [Glycine max]	12.3656	49.1983	11.8802	22.9174	1.51864	2.81318	4.84792	3.909
arahy.Q5TIJ1	ZH16_S1_vs_ZH6_S1;ZH16_S2_vs_ZH6_S2;ZH16_S3_vs_ZH6_S3	--	Unknown protein	1.11149	4.93353	2.39342	2.75463	0.113049	0.249884	0.123384	0.422958
Novel03009	ZH16_S2_vs_ZH6_S2;ZH16_S3_vs_ZH6_S3;ZH16_S4_vs_ZH6_S4	--	PREDICTED: transposon Ty3-G Gag-Pol polyprotein [Phoenix dactylifera]	1.38893	10.7413	5.08685	3.10027	0.457745	0.313435	0.0354184	0
Novel03632	ZH16_S2_vs_ZH6_S2;ZH16_S3_vs_ZH6_S3;ZH16_S4_vs_ZH6_S4	--	--	0.808674	4.30692	3.38979	2.34094	0.725074	0	0	0
Novel00272	ZH16_S2_vs_ZH6_S2;ZH16_S3_vs_ZH6_S3;ZH16_S4_vs_ZH6_S4	--	PREDICTED: uncharacterized protein LOC102669061 [Glycine max]	2.0625	5.69636	1.5115	1.9096	0.452487	0.0792049	0.0260725	0
arahy.RKEW7U	ZH16_S2_vs_ZH6_S2;ZH16_S3_vs_ZH6_S3;ZH16_S4_vs_ZH6_S4	--	protein YIF1B-like isoform X3 [Glycine max]	5.20189	17.7347	13.5804	8.47187	1.31812	0.415801	0.140396	0.0451072
Novel04513	ZH16_S2_vs_ZH6_S2;ZH16_S3_vs_ZH6_S3;ZH16_S4_vs_ZH6_S4	SNF2	PREDICTED: DNA repair protein RAD16 isoform X2 [Cicer arietinum]	1.70241	3.09656	2.52406	2.09068	0.363567	0.0685783	0	0.0331945
arahy.ZRSS9L	ZH16_S2_vs_ZH6_S2;ZH16_S3_vs_ZH6_S3;ZH16_S4_vs_ZH6_S4	--	Unknown protein	0.019135	5.76827	1.20722	1.00956	0.0116731	0.164611	0.0158063	0
arahy.E6UT1J	ZH16_S2_vs_ZH6_S2;ZH16_S3_vs_ZH6_S3	--	Unknown protein	0.238466	2.79312	1.87208	2.13929	0.0449937	0	0	0
arahy.7M3CIR	ZH16_S2_vs_ZH6_S2;ZH16_S3_vs_ZH6_S3	--	DNA binding	0.0260063	0.803792	0.350933	0.245268	0.0749545	0.0203599	0.00507471	0.0260939
arahy.7PGW8X	ZH16_S2_vs_ZH6_S2;ZH16_S3_vs_ZH6_S3	--	Unknown protein	0.487635	5.32895	1.69048	0.401796	0.0432197	0	0	0
arahy.DG4CQN	ZH16_S3_vs_ZH6_S3;ZH16_S4_vs_ZH6_S4	--	putative glycerol-3-phosphate transporter 1-like isoform X2 [Glycine max]	109.814	8.09622	23.6882	13.5285	73.2087	10.4086	9.14542	6.05607
arahy.HJS1BZ	ZH16_S1_vs_ZH6_S1;ZH16_S2_vs_ZH6_S2	--	ureide permease 1	4.62456	26.6772	14.82	16.3471	1.33339	6.84653	8.35024	13.4915
arahy.BE5MC1	ZH16_S1_vs_ZH6_S1;ZH16_S4_vs_ZH6_S4	--	vacuolar cation/proton exchanger 3	108.079	25.7594	4.31951	1.84873	43.2601	72.522	12.81	0.632184
arahy.Y16MZ1	ZH16_S3_vs_ZH6_S3;ZH16_S4_vs_ZH6_S4	--	benzyl alcohol O-benzoyltransferase-like [Glycine max]	0.350842	0.647795	3.81401	3.41521	0.21218	0.496554	0.553092	0.371498
Novel01695	ZH16_S2_vs_ZH6_S2;ZH16_S4_vs_ZH6_S4	--	Oxidoreductase, putative [Medicago truncatula]>gi|355486527|gb|AES67730.1| oxidoreductase family, NAD-binding rossmann fold protein [Medicago truncatula]	0.670748	7.3235	3.02639	3.31731	0.542728	1.83675	1.2343	0.431078
Novel01471	ZH16_S1_vs_ZH6_S1;ZH16_S3_vs_ZH6_S3	--	Hydroxycinnamoyl-Coenzyme A shikimate/quinate hydroxycinnamoyltransferase [Glycine soja]	15.6408	3.40525	4.72564	2.37713	7.6024	2.89038	1.57897	1.26384
arahy.133ZSG	ZH16_S2_vs_ZH6_S2;ZH16_S3_vs_ZH6_S3	--	3-ketoacyl-CoA synthase 4	0.902894	2.46581	2.2631	1.84209	0.475592	0.498141	0.242568	0.376713
arahy.P7L3Q8	ZH16_S2_vs_ZH6_S2;ZH16_S4_vs_ZH6_S4	--	uncharacterized protein LOC100794704 isoform X4 [Glycine max]	1.24625	1.58614	0.691247	0.724652	0.433001	0.0420058	0.0872445	0
Novel04377	ZH16_S3_vs_ZH6_S3;ZH16_S4_vs_ZH6_S4	--	hypothetical protein VITISV_034738 [Vitis vinifera]	8.0221	8.57439	17.7911	17.5592	1.14274	0.597723	0.24714	0
arahy.93DW2D	ZH16_S2_vs_ZH6_S2;ZH16_S3_vs_ZH6_S3	--	fatty acid desaturase 6	0.865752	5.10414	2.65671	1.69069	0.151269	0.189902	0.0780234	0.097189
arahy.CT5VFU	ZH16_S3_vs_ZH6_S3;ZH16_S4_vs_ZH6_S4	--	3beta-hydroxysteroid-dehydrogenase/decarboxylase isoform 2	10.4126	14.2091	7.30682	10.4068	8.28723	7.42952	3.34501	2.16108
arahy.LD9T00	ZH16_S2_vs_ZH6_S2;ZH16_S3_vs_ZH6_S3	--	Unknown protein	0.84745	12.6566	6.27475	0	0.305625	0.0771418	0	0
Novel00873	ZH16_S2_vs_ZH6_S2;ZH16_S4_vs_ZH6_S4	--	hypothetical protein MTR_5g093210 [Medicago truncatula]	11.8525	14.198	8.42447	11.7965	8.01604	4.97988	4.86947	3.19995
arahy.0G9KRE	ZH16_S3_vs_ZH6_S3;ZH16_S4_vs_ZH6_S4	--	glycerol-3-phosphate acyltransferase 9	2.76786	3.2629	18.8517	25.4974	3.92466	4.66081	7.38249	8.87587
arahy.BHNX0U	ZH16_S3_vs_ZH6_S3;ZH16_S4_vs_ZH6_S4	--	Myosin heavy chain-related protein	1.42224	5.37103	3.64174	1.12644	1.54918	4.30948	1.43494	0.345301
Novel03674	ZH16_S3_vs_ZH6_S3;ZH16_S4_vs_ZH6_S4	--	putative cyclase family protein [Arachis hypogaea]	2.10844	0.794109	4.5752	2.85164	0.225389	0.0411405	0.0435991	0
arahy.WHJ0M8	ZH16_S3_vs_ZH6_S3;ZH16_S4_vs_ZH6_S4	--	YGL010w-like protein	67.0333	10.8383	27.3828	18.3938	43.2787	10.1633	7.30357	3.91745
arahy.NB2RRK	ZH16_S3_vs_ZH6_S3;ZH16_S4_vs_ZH6_S4	--	phenylalanine ammonia-lyase 2	6.75856	4.33932	4.87639	1.62961	8.67223	7.69853	2.21588	0.334428
Novel05083	ZH16_S2_vs_ZH6_S2;ZH16_S3_vs_ZH6_S3	--	PREDICTED: uncharacterized protein LOC104109606 [Nicotiana tomentosiformis]	0.298879	11.1508	5.56384	0.703753	0.643664	1.23283	0.167384	0.076187
arahy.691YBH	ZH16_S1_vs_ZH6_S1;ZH16_S2_vs_ZH6_S2	--	Disease resistance protein (TIR-NBS-LRR class) family	1.89746	3.98793	0.86463	1.36165	0.3304	0.427382	0.0471904	0
Novel03430	ZH16_S1_vs_ZH6_S1;ZH16_S2_vs_ZH6_S2	--	PREDICTED: transcription initiation factor TFIID subunit 14b-like [Glycine max]>gi|734411651|gb|KHN36037.1| Protein AF-9 like [Glycine soja]	7.61262	31.6075	12.0014	19.2081	2.18948	8.84485	4.24836	6.24746
arahy.YP3YKY	ZH16_S1_vs_ZH6_S1;ZH16_S3_vs_ZH6_S3	--	Protein kinase superfamily protein	8.77775	2.78742	1.61991	1.15923	4.35045	2.82121	0.602448	0.426394
Novel00410	ZH16_S2_vs_ZH6_S2;ZH16_S3_vs_ZH6_S3	--	PREDICTED: protein FAR1-RELATED SEQUENCE 5-like [Vitis vinifera]	2.40855	12.6955	5.88878	8.22013	1.69693	4.00134	2.8728	3.85541
arahy.WY3QF4	ZH16_S2_vs_ZH6_S2;ZH16_S3_vs_ZH6_S3	--	Integrase-type DNA-binding superfamily protein	0.308147	0.359848	0.238461	0.227262	0.148701	0	0	0
Novel01006	ZH16_S2_vs_ZH6_S2;ZH16_S3_vs_ZH6_S3	--	PREDICTED: bromodomain and WD repeat-containing protein 3-like isoform X2 [Citrus sinensis]>gi|568871358|ref|XP_006488855.1| PREDICTED: bromodomain and WD repeat-containing protein 3-like isoform X3 [Citrus sinensis]	1.51695	4.4721	5.78488	0.82711	0.331603	0.031313	0	0
arahy.MKNY28	ZH16_S2_vs_ZH6_S2;ZH16_S3_vs_ZH6_S3	--	ATP-dependent zinc metalloprotease FTSH protein	1.67994	10.8498	15.0373	8.57541	0.595793	1.42112	2.20868	2.89389
arahy.M32WB3	ZH16_S2_vs_ZH6_S2;ZH16_S3_vs_ZH6_S3	--	gibberellin 20 oxidase 2-like [Glycine max]	0	2.34716	0.85545	0.477194	0	0.0424731	0	0
arahy.FPXF54	ZH16_S3_vs_ZH6_S3;ZH16_S4_vs_ZH6_S4	--	Unknown protein	1.39716	0.91483	10.0526	3.76744	0.504767	0.421212	0.301994	0
Novel02621	ZH16_S2_vs_ZH6_S2;ZH16_S3_vs_ZH6_S3	--	--	0.27895	3.10251	1.41678	0.131502	0.0633044	0.261393	0.0248901	0.0906269
Novel04130	ZH16_S2_vs_ZH6_S2;ZH16_S4_vs_ZH6_S4	TF	Putative Myb family transcription factor [Glycine soja]	1.10746	8.68126	1.60955	4.52883	0.53233	2.45578	0.819073	0.51426
Novel01259	ZH16_S2_vs_ZH6_S2;ZH16_S3_vs_ZH6_S3	--	--	0.545522	3.31792	2.57846	1.27315	0.399093	0.0592209	0	0
arahy.ZD4V4J	ZH16_S1_vs_ZH6_S1;ZH16_S3_vs_ZH6_S3	--	RING-H2 finger protein 2B	13.8865	2.50352	3.6245	0.502844	4.77058	0.821593	0.271632	0.193339
arahy.6856EH	ZH16_S3_vs_ZH6_S3;ZH16_S4_vs_ZH6_S4	--	splicing factor 3B subunit 1	10.1535	13.7914	9.12904	7.41515	5.48953	8.14409	3.21841	3.01079
arahy.S6Z25U	ZH16_S2_vs_ZH6_S2;ZH16_S3_vs_ZH6_S3	--	ketose-bisphosphate aldolase class-II family protein	4.64234	22.0488	7.70001	5.77221	2.41661	7.76517	1.70371	6.4785
arahy.I60LE0	ZH16_S1_vs_ZH6_S1;ZH16_S2_vs_ZH6_S2	--	cyclin d5	1.47892	1.85656	0.914754	1.02633	0.207953	0.0582968	0.0813141	0.191653
arahy.MVBZ07	ZH16_S1_vs_ZH6_S1;ZH16_S2_vs_ZH6_S2	SBP	squamosa promoter binding protein-like 3	35.9291	10.2303	0.156922	0	16.3667	2.70591	0.552245	0
arahy.0XL2Q0	ZH16_S1_vs_ZH6_S1;ZH16_S3_vs_ZH6_S3	--	Unknown protein	5.2315	13.3302	7.52826	6.90046	2.37801	8.13117	3.36195	4.20264
arahy.E5AP7I	ZH16_S2_vs_ZH6_S2;ZH16_S3_vs_ZH6_S3	--	Protein of unknown function (DUF581)	2.59642	34.1078	10.8196	12.878	1.75537	4.68688	1.86453	6.6319
arahy.00R4IN	ZH16_S2_vs_ZH6_S2;ZH16_S4_vs_ZH6_S4	--	putative nuclease HARBI1-like [Glycine max]	3.36695	37.4659	8.59609	10.3342	2.71486	17.6465	7.08277	3.99192
Novel03861	ZH16_S2_vs_ZH6_S2;ZH16_S4_vs_ZH6_S4	--	hypothetical protein PHAVU_008G121300g [Phaseolus vulgaris]>gi|593430446|ref|XP_007140544.1| hypothetical protein PHAVU_008G121300g [Phaseolus vulgaris]>gi|561013676|gb|ESW12537.1| hypothetical protein PHAVU_008G121300g [Phaseolus vulgaris]>gi|561013677|gb|ESW12538.1| hypothetical protein PHAVU_008G121300g [Phaseolus vulgaris]	0.212491	5.24778	1.04422	2.36953	0.0921621	0.319033	0.415027	0
Novel00306	ZH16_S1_vs_ZH6_S1;ZH16_S2_vs_ZH6_S2	--	hypothetical protein MTR_4g115940 [Medicago truncatula]	1.02117	0.844724	0.605614	1.08458	0.0238542	0	0	0
arahy.HITK0G	ZH16_S3_vs_ZH6_S3;ZH16_S4_vs_ZH6_S4	TF	nuclear transcription factor Y subunit A-10-like isoform X7 [Glycine max]	0.780821	9.62804	23.6775	7.57962	0.925051	7.84267	9.23315	2.1086
arahy.6G7KNU	ZH16_S1_vs_ZH6_S1;ZH16_S2_vs_ZH6_S2	--	hydroxymethylglutaryl-CoA synthase-like [Glycine max]	2.44578	6.92338	0.737041	2.51916	0.538627	0.373465	0.547592	0.545143
arahy.KJE0V2	ZH16_S1_vs_ZH6_S1;ZH16_S2_vs_ZH6_S2	--	F-box and associated interaction domains-containing protein	1.38774	1.58502	0.307123	0	0.0759977	0.0483243	0	0
Novel03889	ZH16_S2_vs_ZH6_S2;ZH16_S3_vs_ZH6_S3	--	--	0.603861	2.96644	1.03738	1.24218	0.0999652	0	0	0
Novel04528	ZH16_S1_vs_ZH6_S1;ZH16_S2_vs_ZH6_S2	--	unnamed protein product [Vitis vinifera]	1.39761	1.0946	0.221144	0.586185	0	0	0	0
arahy.17JY83	ZH16_S2_vs_ZH6_S2;ZH16_S4_vs_ZH6_S4	TF	putative Myb family transcription factor At1g14600-like isoform X2 [Glycine max]	0.104647	5.85693	1.32888	2.29704	0.185043	0.448409	0.914077	0
arahy.XWQI9I	ZH16_S2_vs_ZH6_S2;ZH16_S3_vs_ZH6_S3	--	Unknown protein	0.949699	4.45057	2.35215	1.51033	0.282066	0.179356	0	0
arahy.G9FEDL	ZH16_S1_vs_ZH6_S1;ZH16_S2_vs_ZH6_S2	--	pyruvate decarboxylase-2	3.99122	15.2157	0.779138	1.34436	0.518141	0.765327	1.51881	0.867774
arahy.606BFT	ZH16_S3_vs_ZH6_S3;ZH16_S4_vs_ZH6_S4	--	Pectate lyase family protein	308.228	14.25	17.7247	4.42202	500.204	15.1081	8.72329	1.43618
Novel01647	ZH16_S2_vs_ZH6_S2;ZH16_S3_vs_ZH6_S3	--	hypothetical protein PHAVU_009G1265000g, partial [Phaseolus vulgaris]>gi|561010519|gb|ESW09426.1| hypothetical protein PHAVU_009G1265000g, partial [Phaseolus vulgaris]	0.513387	1.76731	1.06254	0.0355514	0.0383717	0.0490282	0	0
arahy.2K1FXD	ZH16_S1_vs_ZH6_S1;ZH16_S2_vs_ZH6_S2	--	E3 ubiquitin-protein ligase KEG-like [Glycine max]	7.64961	5.84617	1.49975	1.00378	0.956429	0.955127	0.634921	0
arahy.6G7EGE	ZH16_S1_vs_ZH6_S1;ZH16_S2_vs_ZH6_S2	TF	myb transcription factor	6.00832	0.666421	0.155172	0.108896	0.171226	0	0.0153819	0
arahy.92S4AT	ZH16_S1_vs_ZH6_S1;ZH16_S3_vs_ZH6_S3	--	Patatin-like phospholipase family protein	9.88834	3.20186	3.82508	2.49105	4.65859	1.92554	1.44596	1.78407
arahy.MG09JY	ZH16_S3_vs_ZH6_S3;ZH16_S4_vs_ZH6_S4	--	UDP-Glycosyltransferase superfamily protein	0.156669	0.81489	2.51362	0.980644	0.282137	0.14772	0	0
arahy.FKP2UG	ZH16_S1_vs_ZH6_S1;ZH16_S2_vs_ZH6_S2	--	lipoamide acyltransferase component of branched-chain alpha-keto acid dehydrogenase complex, mitochondrial-like isoform X2 [Glycine max]	4.29062	20.5308	9.58909	7.79264	1.40016	6.10621	7.03147	6.95265
Novel00350	ZH16_S1_vs_ZH6_S1;ZH16_S3_vs_ZH6_S3	--	--	3.54887	3.39158	2.45215	2.39192	1.33488	1.65745	0.662706	0.568888
Novel02812	ZH16_S3_vs_ZH6_S3;ZH16_S4_vs_ZH6_S4	--	--	2.74351	5.19086	13.006	12.3919	0.914691	1.65832	0.181253	0.200672
arahy.D3ZGNR	ZH16_S2_vs_ZH6_S2;ZH16_S4_vs_ZH6_S4	--	Dynamin related protein 4C	3.32198	13.5164	3.47232	3.76677	2.08001	5.07398	2.74242	1.23799
arahy.C0PD3X	ZH16_S2_vs_ZH6_S2;ZH16_S4_vs_ZH6_S4	--	Phosphoglycerate mutase family protein	1.53797	9.06661	2.66281	4.13372	0.417603	0.241838	0.706783	0
Novel02809	ZH16_S1_vs_ZH6_S1;ZH16_S3_vs_ZH6_S3	--	--	5.73235	4.88751	4.29641	3.42262	0.528507	0.415547	0.0376652	0.125101
Novel03972	ZH16_S2_vs_ZH6_S2;ZH16_S4_vs_ZH6_S4	--	PREDICTED: uncharacterized protein LOC104109606 [Nicotiana tomentosiformis]	0	6.70365	0.94461	1.62418	0	1.79021	0.451112	0.269231
arahy.SRT95Q	ZH16_S1_vs_ZH6_S1;ZH16_S2_vs_ZH6_S2	--	4-coumarate:CoA ligase 3	3.85545	16.6152	5.1243	7.83358	0.0992453	1.90498	1.61263	0.978622
arahy.B7U3FX	ZH16_S1_vs_ZH6_S1;ZH16_S3_vs_ZH6_S3	--	DEAD-box ATP-dependent RNA helicase 28-like [Glycine max]	4.40759	11.5411	4.07935	0.376714	0.727765	4.78816	1.29241	0.785042
arahy.NSV5VW	ZH16_S1_vs_ZH6_S1;ZH16_S2_vs_ZH6_S2	--	ubiquitin protein ligase 6	0.714966	1.19426	0.41014	0.382901	0.066587	0.0588737	0.0819672	0.0149225
Novel02976	ZH16_S1_vs_ZH6_S1;ZH16_S2_vs_ZH6_S2	--	PREDICTED: phosphatidate phosphatase LPIN2-like isoform X1 [Glycine max]	4.74714	23.8475	8.92793	14.1152	1.51196	6.05294	8.0469	11.3212
arahy.35E9MG	ZH16_S1_vs_ZH6_S1;ZH16_S3_vs_ZH6_S3	--	protein POLLEN DEFECTIVE IN GUIDANCE 1-like isoform X2 [Glycine max]	3.46983	4.61157	4.03524	0.997303	0.799523	1.34901	0.893615	1.90642
Novel03653	ZH16_S2_vs_ZH6_S2;ZH16_S4_vs_ZH6_S4	--	hypothetical protein VITISV_021305 [Vitis vinifera]	0.572987	2.05522	1.46491	1.09493	0.210555	0.23614	0.131588	0
arahy.HK9WB5	ZH16_S2_vs_ZH6_S2;ZH16_S4_vs_ZH6_S4	--	uncharacterized protein LOC100815984 isoform X2 [Glycine max]	1.96208	10.4801	3.38346	3.61964	1.77003	3.84498	1.73936	1.36596
arahy.D4T6QG	ZH16_S1_vs_ZH6_S1;ZH16_S2_vs_ZH6_S2	--	WEB family protein At4g27595, chloroplastic-like isoform X2 [Glycine max]	3.47612	27.2526	7.44385	14.6741	1.52601	10.1258	6.86863	6.48625
arahy.SVE7QB	;ZH16_S3_vs_ZH6_S3;ZH16_S4_vs_ZH6_S4	bHLH	basic helix-loop-helix (bHLH) DNA-binding superfamily protein	1.26107	27.9617	20.8303	8.23002	2.90276	38.735	10.4925	2.17116
arahy.Y1UXXN	ZH16_S2_vs_ZH6_S2;ZH16_S4_vs_ZH6_S4	--	receptor-like protein kinase 2	0.0720632	0.688862	0.468217	1.07099	0.091092	0	0.0205576	0
Novel01289	ZH16_S2_vs_ZH6_S2;ZH16_S3_vs_ZH6_S3	--	--	0	3.6473	2.44538	1.49126	0.0501385	0.116143	0	0
arahy.LXN0TE	ZH16_S2_vs_ZH6_S2;ZH16_S3_vs_ZH6_S3	--	ARM repeat superfamily protein	0.192572	5.21419	2.76409	2.92278	0.291132	0.601554	0.582489	0.718512
arahy.T9VJMQ	ZH16_S1_vs_ZH6_S1;ZH16_S2_vs_ZH6_S2	--	transcription initiation factor TFIID subunit-like protein	2.20099	20.4831	4.92422	10.3062	0.657447	6.38924	5.4047	5.43486
arahy.QUI6I3	ZH16_S2_vs_ZH6_S2;ZH16_S3_vs_ZH6_S3	--	pentatricopeptide repeat-containing protein At1g22960, mitochondrial-like isoform X9 [Glycine max]	0.0621586	1.10336	2.72956	1.48093	0.113758	0	0	0
arahy.D7W23L	ZH16_S1_vs_ZH6_S1;ZH16_S2_vs_ZH6_S2	--	probable galacturonosyltransferase 4-like [Glycine max]	0.301856	1.37384	0.333665	0.865443	0	0.0525326	0.191312	0
arahy.QSK9AI	ZH16_S1_vs_ZH6_S1;ZH16_S2_vs_ZH6_S2	AUX/IAA	indole-3-acetic acid inducible 18	9.5126	5.3679	0.8288	0.219663	4.74459	1.88815	0.623243	0.318774
arahy.742XN0	;ZH16_S3_vs_ZH6_S3;ZH16_S4_vs_ZH6_S4	--	plasma membrane intrinsic protein 1	12.2539	10.5808	14.4692	3.56933	48.9239	10.4652	5.36224	1.34297
arahy.VEFL47	;ZH16_S2_vs_ZH6_S2;ZH16_S4_vs_ZH6_S4	--	chromatin assembly factor 1 subunit FAS1-like [Glycine max]	1.15021	17.3582	2.6267	3.06942	2.69326	3.72827	2.53693	0.75685
arahy.T9TG4X	ZH16_S2_vs_ZH6_S2;ZH16_S4_vs_ZH6_S4	--	Coatomer, beta' subunit	1.85725	17.3277	5.77931	23.8236	0.70558	2.32234	1.51529	2.04485
Novel02222	ZH16_S1_vs_ZH6_S1;ZH16_S2_vs_ZH6_S2	--	unknown [Glycine max]	1.87858	3.14057	1.10484	0.709229	0.0869067	0.0277606	0.0588392	0
arahy.T9S3N5	ZH16_S3_vs_ZH6_S3;ZH16_S4_vs_ZH6_S4	--	RNA-binding protein 24-A-like [Glycine max]	44.4523	49.0214	64.7275	58.396	4.87843	2.90615	1.07531	0
arahy.E2S3DE	ZH16_S2_vs_ZH6_S2;ZH16_S4_vs_ZH6_S4	--	Ribonuclease HI n=2 Tax=Peptoniphilus RepID=E0NJN4_9FIRM	0.816584	2.01376	0.544	1.65781	0.161531	0.0374177	0.0218726	0.03982
arahy.3ZDQ4J	ZH16_S3_vs_ZH6_S3;ZH16_S4_vs_ZH6_S4	--	lipid transfer protein	379.647	30.2952	150.355	203.435	251.944	56.7176	57.7021	65.2069
Novel01237	ZH16_S1_vs_ZH6_S1;ZH16_S2_vs_ZH6_S2	--	--	1.40895	5.55116	1.0412	1.61535	0.0802549	0.496889	0.135839	0.0989206
arahy.J8Y94D	;ZH16_S3_vs_ZH6_S3;ZH16_S4_vs_ZH6_S4	--	Cytochrome P450 superfamily protein	2.04493	5.36016	17.9119	18.8484	4.49715	5.35698	6.46329	8.58703
arahy.E05UEM	ZH16_S3_vs_ZH6_S3;ZH16_S4_vs_ZH6_S4	--	Water-selective transport intrinsic membrane protein 1 n=1 Tax=Lotus japonicus RepID=Q9LKJ6_LOTJA	555.387	73.3587	95.2358	36.9278	558.63	99.9411	39.4688	16.484
Novel01692	ZH16_S2_vs_ZH6_S2;ZH16_S3_vs_ZH6_S3	--	--	0.345592	1.71105	1.30617	1.14068	0.204957	0	0	0
Novel00932	ZH16_S3_vs_ZH6_S3;ZH16_S4_vs_ZH6_S4	--	hypothetical protein B456_001G146500 [Gossypium raimondii]	17.2041	74.4585	82.4163	32.6272	9.91336	4.1883	1.38514	0.378269
arahy.941VE1	ZH16_S1_vs_ZH6_S1;ZH16_S2_vs_ZH6_S2	--	protein kinase family protein	2.02768	0.393571	0.101409	0.0316228	0.0341621	0	0	0
arahy.Y7TDZM	ZH16_S3_vs_ZH6_S3;ZH16_S4_vs_ZH6_S4	--	glycyl-tRNA synthetase/glycine-tRNA ligase	0	0.0297513	1.84528	2.53327	0	0.0737065	0.055537	0.0505538
arahy.04P64Q	ZH16_S1_vs_ZH6_S1;ZH16_S3_vs_ZH6_S3	--	guanine nucleotide-binding protein alpha-2 subunit-like isoform X1 [Glycine max]	5.83871	7.08826	7.65594	4.64072	2.75537	5.24391	3.60656	3.02262
arahy.J9EPM7	ZH16_S2_vs_ZH6_S2;ZH16_S3_vs_ZH6_S3	--	protein OBERON 3-like isoform X1 [Glycine max]	3.3915	10.7489	5.49734	3.43659	2.56837	4.09232	2.19535	2.05841
arahy.V1RZF6	ZH16_S1_vs_ZH6_S1;ZH16_S2_vs_ZH6_S2	--	Sodium/calcium exchanger n=2 Tax=Papilionoideae RepID=G7IF47_MEDTR	9.78613	6.86399	1.94352	2.12509	3.90404	2.44233	2.11257	1.65296
arahy.US7GFF	ZH16_S3_vs_ZH6_S3;ZH16_S4_vs_ZH6_S4	--	Unknown protein	1.58328	4.69151	12.443	12.1223	0.5705	0.606005	0.187256	0.127852
arahy.T3VW13	ZH16_S3_vs_ZH6_S3;ZH16_S4_vs_ZH6_S4	--	organic cation/carnitine transporter 2	11.6338	5.9501	11.3735	11.5251	8.67044	4.58901	3.28965	2.75481
arahy.6UA35R	ZH16_S1_vs_ZH6_S1;ZH16_S4_vs_ZH6_S4	--	Pyruvate dehydrogenase complex dihydrolipoamide acetyltransferase n=3 Tax=Bartonella RepID=J0YU40_9RHIZ	8.6103	10.0652	8.10358	6.50406	3.88287	6.14839	6.88631	1.34604
arahy.PD6YD2	ZH16_S2_vs_ZH6_S2;ZH16_S4_vs_ZH6_S4	--	CBS domain-containing protein CBSCBSPB1-like isoform X4 [Glycine max]	13.0146	13.2154	4.63921	4.11772	7.56074	5.64302	3.37311	1.88308
arahy.12HWWY	ZH16_S1_vs_ZH6_S1;ZH16_S3_vs_ZH6_S3	HD-ZIP	DNA binding protein n=4 Tax=Andropogoneae RepID=B6SLL1_MAIZE	7.05858	1.33618	10.0075	2.20486	1.79799	3.5009	1.10866	0.534364
arahy.ZLD5YB	ZH16_S1_vs_ZH6_S1;ZH16_S4_vs_ZH6_S4	--	Protein kinase superfamily protein	5.73715	0.141566	0.292862	0.298195	0.121157	0.00911663	0.0193229	0
arahy.W4IL1P	ZH16_S2_vs_ZH6_S2;ZH16_S4_vs_ZH6_S4	--	ATP-binding/protein serine/threonine kinase [Glycine max]	3.51116	3.89479	0.914177	0.791749	2.26143	1.42814	0.404608	0.130032
Novel04399	ZH16_S2_vs_ZH6_S2;ZH16_S4_vs_ZH6_S4	--	--	0.871887	17.3667	24.1489	80.5358	0.659307	6.74345	26.454	23.7177
arahy.1SN7TU	;ZH16_S3_vs_ZH6_S3;ZH16_S4_vs_ZH6_S4	--	plasma membrane intrinsic protein 1	13.175	6.27793	15.434	6.38885	54.2716	9.36658	7.61752	1.77406
arahy.82LERJ	ZH16_S1_vs_ZH6_S1;ZH16_S4_vs_ZH6_S4	--	hypothetical protein	7.64971	26.9011	9.1595	8.78235	3.61512	13.0609	4.41646	3.29674
arahy.9TQH81	ZH16_S1_vs_ZH6_S1;ZH16_S2_vs_ZH6_S2	--	probable choline kinase 2-like isoform X2 [Glycine max]	1.00742	6.9399	1.26156	0.225434	0.187161	0.893304	0.422559	0.120715
arahy.U77MTX	ZH16_S2_vs_ZH6_S2;ZH16_S4_vs_ZH6_S4	--	probable rhamnose biosynthetic enzyme 1-like isoform X2 [Glycine max]	0	2.678	0.766927	2.44168	0.0546449	0.331036	0.263082	0.253647
arahy.K541B7	ZH16_S1_vs_ZH6_S1;ZH16_S2_vs_ZH6_S2	--	histidine kinase 1	0.515235	0.914933	0.145758	0.15223	0.0769418	0.0467695	0	0
arahy.Z1RXDB	;ZH16_S3_vs_ZH6_S3;ZH16_S4_vs_ZH6_S4	--	long-chain-alcohol oxidase FAO4A-like [Glycine max]	0.455759	1.39527	6.84938	3.43552	1.09863	0.953039	2.14315	1.16146
arahy.WAL6D9	ZH16_S1_vs_ZH6_S1;ZH16_S4_vs_ZH6_S4	--	glycerol-3-phosphate dehydrogenase	3.0572	1.62813	1.26068	1.85351	1.42863	1.03571	1.01483	0.864683
arahy.R6HD8X	ZH16_S2_vs_ZH6_S2;ZH16_S4_vs_ZH6_S4	--	probable Xaa-Pro aminopeptidase 3-like isoform X1 [Glycine max]	0	1.11867	0.221894	1.47957	0.037217	0.0237764	0	0
arahy.QD1ITD	ZH16_S2_vs_ZH6_S2;ZH16_S4_vs_ZH6_S4	B3	B3 DNA-binding domain protein	1.96925	8.45328	1.59329	3.30236	0.248669	0.645164	0.58663	0
arahy.X3UFUD	ZH16_S2_vs_ZH6_S2;ZH16_S3_vs_ZH6_S3	--	nitrate transporter 1.7	0.571529	3.85732	1.36137	0.926636	0.87819	0.567302	0.37735	0.258728
arahy.X6L2LG	ZH16_S2_vs_ZH6_S2;ZH16_S4_vs_ZH6_S4	--	Glycosyl hydrolase family 47 protein	0.1888	12.8244	1.45086	2.51735	0.142491	1.22439	0.192944	0
Novel04584	ZH16_S2_vs_ZH6_S2;ZH16_S4_vs_ZH6_S4	--	hypothetical protein ARAX_ADH51I17-83F22-001 [Arachis duranensis]	5.38593	24.3151	1.7862	0.875833	3.76228	8.6258	2.01116	0.15239
arahy.GRN8HF	ZH16_S2_vs_ZH6_S2;ZH16_S3_vs_ZH6_S3	--	receptor-like kinase	0.577545	5.57304	3.41783	0.605079	0.140868	1.43705	0.327008	0.495376
arahy.E3VZN9	ZH16_S1_vs_ZH6_S1;ZH16_S4_vs_ZH6_S4	--	Unknown protein	1.4807	1.54296	0.793487	0.787431	0.459703	0.55466	0.355377	0
Novel01256	ZH16_S3_vs_ZH6_S3;ZH16_S4_vs_ZH6_S4	--	--	18.9287	18.9828	19.0403	16.2163	4.47931	4.83172	0.598423	0
arahy.F98T17	ZH16_S3_vs_ZH6_S3;ZH16_S4_vs_ZH6_S4	--	DWNN domain, a CCHC-type zinc finger	3.75236	3.19773	3.06483	1.63624	2.17656	2.15555	1.22346	0.420189
Novel02412	ZH16_S1_vs_ZH6_S1;ZH16_S2_vs_ZH6_S2	--	--	11.3516	8.14749	5.04786	1.64356	2.21247	2.82823	4.16092	2.18992
arahy.R541Y6	ZH16_S2_vs_ZH6_S2;ZH16_S3_vs_ZH6_S3	--	Disease resistance protein (TIR-NBS-LRR class) family	0.264946	0.253441	0.221279	0.20103	0.105038	0.0167503	0.00594497	0
arahy.IKQ3TM	ZH16_S2_vs_ZH6_S2;ZH16_S4_vs_ZH6_S4	--	Unknown protein	0.168162	5.36628	2.93067	2.63558	0.137809	0.388074	0.186604	0
arahy.HHS436	;ZH16_S2_vs_ZH6_S2;ZH16_S3_vs_ZH6_S3	--	Unknown protein	0	15.616	6.81825	1.94704	1.05675	0.280315	0.0511045	0
arahy.557ZRD	ZH16_S1_vs_ZH6_S1;ZH16_S2_vs_ZH6_S2	--	small nuclear ribonucleoprotein E [Glycine max]	12.7761	24.2284	8.84569	7.71632	6.328	9.96044	5.46112	3.81071
Novel03424	ZH16_S1_vs_ZH6_S1;ZH16_S2_vs_ZH6_S2	--	unknown [Medicago truncatula]>gi|657371275|gb|KEH17281.1| cytosolic class I small heat shock protein [Medicago truncatula]	17.9056	0.532077	0.254536	0.614243	0.460318	0	0	0
Novel03478	ZH16_S2_vs_ZH6_S2;ZH16_S4_vs_ZH6_S4	--	PREDICTED: RING-H2 finger protein ATL67 [Jatropha curcas]>gi|643716928|gb|KDP28554.1| hypothetical protein JCGZ_14325 [Jatropha curcas]	0.451924	57.4438	2.9035	5.68489	0.446016	8.46707	2.32727	0.993071
arahy.5ESV8I	ZH16_S1_vs_ZH6_S1;ZH16_S2_vs_ZH6_S2	--	nicotinate phosphoribosyltransferase-like [Glycine max]	2.78776	12.0386	1.99585	3.19783	0.356865	0.662034	0.298226	0.180978
arahy.US0JF3	ZH16_S1_vs_ZH6_S1;ZH16_S3_vs_ZH6_S3	--	transmembrane protein, putative	9.66051	191.141	55.7816	17.3338	3.12016	95.2445	27.7605	8.48169
Novel02766	ZH16_S2_vs_ZH6_S2;ZH16_S4_vs_ZH6_S4	--	endonuclease/exonuclease/phosphatase family protein [Medicago truncatula]	0.52996	2.8274	2.22011	2.03261	0.0504531	0.0262034	0.637597	0
arahy.E8ECL6	ZH16_S3_vs_ZH6_S3;ZH16_S4_vs_ZH6_S4	--	Phototropic-responsive NPH3 family protein	2.19365	0.44235	1.77469	2.31741	0.320896	0	0	0
Novel00803	ZH16_S1_vs_ZH6_S1;ZH16_S2_vs_ZH6_S2	--	PREDICTED: uncharacterized protein LOC103936764 [Pyrus x bretschneideri]	0.814093	1.68722	0.811283	0.770825	0.357554	0.673921	0.578595	0.447415
Novel00326	ZH16_S3_vs_ZH6_S3;ZH16_S4_vs_ZH6_S4	--	--	10.1316	7.39289	22.0719	18.5505	1.00638	0.431979	0.14866	0
arahy.SHB49X	ZH16_S3_vs_ZH6_S3;ZH16_S4_vs_ZH6_S4	--	blue copper protein-like [Glycine max]	4.27104	0.662748	12.8947	6.75581	4.6714	0	0.188551	0
arahy.1S4SY2	ZH16_S1_vs_ZH6_S1;ZH16_S2_vs_ZH6_S2	--	SufS subfamily cysteine desulfurase	4.01168	12.3558	8.16541	5.5084	1.87697	5.97839	5.94915	3.90526
arahy.MYUV96	ZH16_S1_vs_ZH6_S1;ZH16_S2_vs_ZH6_S2	--	Unknown protein	0.730741	0.877758	0.86817	0.935251	0.0972471	0.159362	0.414225	0.208922
arahy.ZDS5RA	ZH16_S3_vs_ZH6_S3;ZH16_S4_vs_ZH6_S4	--	vam6/Vps39-like protein	0.205161	0.397968	0.545505	0.348292	0.0605947	0.0475213	0	0
arahy.0PNZ7T	ZH16_S2_vs_ZH6_S2;ZH16_S3_vs_ZH6_S3	--	Glycerophosphodiester phosphodiesterase GDE1 n=2 Tax=Triticeae RepID=M8BLH1_AEGTA	8.92979	0.889482	0.481048	0	4.45916	0.133226	0	0.0411143
Novel02570	ZH16_S1_vs_ZH6_S1;ZH16_S2_vs_ZH6_S2	--	ABC transporter protein [Capsicum chinense]	11.5542	9.8735	8.34368	7.46822	4.93725	3.77176	3.89824	5.34737
arahy.9PBJ5X	ZH16_S3_vs_ZH6_S3;ZH16_S4_vs_ZH6_S4	--	Ribosomal protein L30/L7 family protein	43.7779	83.5367	156.467	120.622	4.56299	4.62824	1.24992	0.1495
Novel00926	ZH16_S2_vs_ZH6_S2;ZH16_S3_vs_ZH6_S3	--	PREDICTED: LYR motif-containing protein 4 [Nelumbo nucifera]	5.84177	13.057	7.2766	3.37528	1.70797	0.272867	0.185018	0.0842086
arahy.BZC8YM	ZH16_S1_vs_ZH6_S1;ZH16_S2_vs_ZH6_S2	--	4-hydroxy-3-methylbut-2-en-1-yl diphosphate synthase, chloroplastic-like [Glycine max]	1.72508	6.23626	1.53393	3.54637	0.0408064	0.439261	0.368354	0.568238
arahy.J1W7N5	ZH16_S2_vs_ZH6_S2;ZH16_S3_vs_ZH6_S3	--	Unknown protein	1.99875	9.27559	4.43662	3.55612	0.25656	0.237443	0	0
Novel04356	ZH16_S3_vs_ZH6_S3;ZH16_S4_vs_ZH6_S4	--	hypothetical protein VITISV_003778 [Vitis vinifera]	10.387	24.7548	17.0819	16.2889	6.1761	12.8026	5.11583	2.83217
arahy.HJB560	ZH16_S2_vs_ZH6_S2;ZH16_S4_vs_ZH6_S4	--	homolog of DNA mismatch repair protein MSH3	0.626417	4.46001	0.956345	1.88379	0.348802	0.406714	0.214219	0.139831
Novel04593	ZH16_S2_vs_ZH6_S2;ZH16_S3_vs_ZH6_S3	--	unknown [Lotus japonicus]	1.94001	11.8	3.80936	0	0.543867	0.0629982	0.0210411	0.0383062
arahy.H6KYDJ	ZH16_S2_vs_ZH6_S2;ZH16_S3_vs_ZH6_S3	--	Pentatricopeptide repeat (PPR) superfamily protein	0.273693	1.90043	1.50431	0.679143	0.0402614	0.186285	0.139317	0.0661673
Novel01690	ZH16_S3_vs_ZH6_S3;ZH16_S4_vs_ZH6_S4	--	--	5.0655	5.93789	22.1601	20.0079	3.19472	6.96952	5.57743	2.77306
arahy.HQ5YUL	ZH16_S1_vs_ZH6_S1;ZH16_S2_vs_ZH6_S2	--	ATP-binding ABC transporter	4.09928	2.09242	1.21005	0.852837	1.46572	0.978495	1.02182	0.840015
arahy.CYJA9T	ZH16_S1_vs_ZH6_S1;ZH16_S4_vs_ZH6_S4	--	Ulp1 protease family, carboxy-terminal domain protein	1.03449	3.70317	1.20115	1.2932	0.120885	0.854187	0.172769	0
Novel03947	ZH16_S2_vs_ZH6_S2;ZH16_S4_vs_ZH6_S4	--	Long chain acyl-CoA synthetase 4 [Glycine soja]	0.713303	4.25209	0.659157	3.00225	0.0394707	0.210454	0	0
arahy.5M7VL0	ZH16_S2_vs_ZH6_S2;ZH16_S3_vs_ZH6_S3	--	Unknown protein	1.67101	3.6357	4.32961	0	0.321555	0.0827624	0.0967578	0
arahy.N80N6E	ZH16_S1_vs_ZH6_S1;ZH16_S4_vs_ZH6_S4	--	vesicle associated protein	2.41802	0.169551	0.547733	0.891653	0.52185	0.167256	0.130558	0
arahy.U88305	ZH16_S2_vs_ZH6_S2;ZH16_S4_vs_ZH6_S4	--	Unknown protein	0.208132	1.88112	0.764079	2.40764	0.285014	0.078799	0.267162	0
arahy.AI0VCX	ZH16_S1_vs_ZH6_S1;ZH16_S4_vs_ZH6_S4	--	Late embryogenesis abundant protein	227.026	58.6597	14.1497	14.4886	60.1083	29.8966	9.27634	3.90662
arahy.IAT0HN	ZH16_S1_vs_ZH6_S1;ZH16_S2_vs_ZH6_S2	--	ATP-dependent zinc metalloprotease FTSH protein	2.75795	20.0521	10.6969	14.7143	1.00931	4.91575	6.79772	12.0234
Novel00736	ZH16_S2_vs_ZH6_S2;ZH16_S3_vs_ZH6_S3	--	hypothetical protein PHAVU_002G1389001g, partial [Phaseolus vulgaris]>gi|561031690|gb|ESW30269.1| hypothetical protein PHAVU_002G1389001g, partial [Phaseolus vulgaris]	1.52835	4.35529	3.18033	3.18528	0.389536	0.398468	0.108769	0.873955
Novel00484	ZH16_S1_vs_ZH6_S1;ZH16_S2_vs_ZH6_S2	--	hypothetical protein 205D04_9 [Arachis hypogaea]	0.569251	2.93388	0.876722	1.32777	0	0.417362	0.110323	0.0916072
arahy.UJ6S9W	ZH16_S1_vs_ZH6_S1;ZH16_S3_vs_ZH6_S3	--	isoflavone reductase homolog 2 [Glycine max]	10.7715	4.05359	3.74462	1.10806	4.61757	5.14042	1.58464	0.509218
arahy.XAZ91P	ZH16_S2_vs_ZH6_S2;ZH16_S4_vs_ZH6_S4	--	ubiquitin carboxyl-terminal hydrolase 27-like [Glycine max]	2.24609	5.43561	2.43946	3.52836	0.292027	0.390801	0.197714	0
arahy.GC7XSK	ZH16_S1_vs_ZH6_S1;ZH16_S2_vs_ZH6_S2	--	copper ion binding	448.661	187.408	120.038	67.8157	175.393	85.5755	62.6521	38.4622
arahy.DZTW61	ZH16_S3_vs_ZH6_S3;ZH16_S4_vs_ZH6_S4	--	subtilisin-like serine protease 2	6.91902	88.7932	80.1492	114.629	7.4151	51.941	26.1297	22.8364
arahy.PYMC5A	ZH16_S1_vs_ZH6_S1;ZH16_S3_vs_ZH6_S3	--	HXXXD-type acyl-transferase family protein	24.4794	0.527529	1.301	0.491483	4.60869	0.147342	0.0447033	0.0406922
Novel03792	ZH16_S1_vs_ZH6_S1;ZH16_S2_vs_ZH6_S2	--	PREDICTED: uncharacterized protein LOC101491436 [Cicer arietinum]	7.83304	16.0301	2.23505	13.658	0.761577	0	0.229142	2.05295
arahy.KKG9B8	ZH16_S2_vs_ZH6_S2;ZH16_S4_vs_ZH6_S4	--	Polyketide cyclase/dehydrase and lipid transport superfamily protein	0.701832	4.89036	0.508127	1.4591	0.154594	0.247006	0.0380603	0
arahy.HG0CRM	ZH16_S3_vs_ZH6_S3;ZH16_S4_vs_ZH6_S4	--	BEL1-like homeodomain protein 1-like isoform X4 [Glycine max]	77.6953	1.29527	3.21377	1.70854	118.972	2.10758	1.19679	0.558718
arahy.M0844A	ZH16_S2_vs_ZH6_S2;ZH16_S3_vs_ZH6_S3	--	LRR and NB-ARC domain disease resistance protein	2.6031	11.7196	2.03171	1.79036	1.28902	2.66336	0.802331	0.631494
arahy.UH3N3K	ZH16_S2_vs_ZH6_S2;ZH16_S4_vs_ZH6_S4	--	DNA-directed RNA polymerase-like protein	0.285272	3.42757	0.936397	1.52025	0.333629	0.209434	0.228028	0.0469971
arahy.PPI4NM	ZH16_S2_vs_ZH6_S2;ZH16_S4_vs_ZH6_S4	--	RNA polymerase I specific transcription initiation factor RRN3 protein	1.98195	23.8506	8.5314	12.6729	2.01691	7.0235	4.6462	3.62971
arahy.FB4L04	ZH16_S3_vs_ZH6_S3;ZH16_S4_vs_ZH6_S4	--	COP1-interacting protein 7	21.3748	2.74104	8.55546	6.33412	26.2038	2.20733	3.3269	2.73771
arahy.V8BLVD	ZH16_S2_vs_ZH6_S2;ZH16_S3_vs_ZH6_S3	--	F-box/RNI-like superfamily protein	2.84717	1.10359	1.51037	0.577716	2.95261	0.374726	0.258127	0.406756
arahy.D87ERS	ZH16_S2_vs_ZH6_S2;ZH16_S4_vs_ZH6_S4	--	SPX and EXS domain-containing protein 1-like isoform X2 [Glycine max]	5.34325	28.5796	10.5322	17.2276	3.50395	10.1049	3.72427	1.81369
arahy.FZ7LTG	ZH16_S1_vs_ZH6_S1;ZH16_S2_vs_ZH6_S2	--	geminivirus Rep-interacting motor protein-like isoform X3 [Glycine max]	3.97857	6.65387	2.75858	2.97291	1.34176	1.65705	1.56946	0.612837
arahy.QE2XZS	ZH16_S2_vs_ZH6_S2;ZH16_S4_vs_ZH6_S4	--	nodulin MtN21 /EamA-like transporter family protein	1.55809	12.0106	5.31059	7.88439	0.619547	2.26648	2.38883	2.11702
arahy.TG3MVJ	ZH16_S1_vs_ZH6_S1;ZH16_S2_vs_ZH6_S2	--	DEAD-box ATP-dependent RNA helicase	4.12588	0.46631	0.176903	0.280122	0.0518637	0	0	0
arahy.N144JB	ZH16_S2_vs_ZH6_S2;ZH16_S3_vs_ZH6_S3	--	polygalacturonase QRT3-like [Glycine max]	0.584794	4.26618	0.395045	1.20617	0.142351	0.12083	0	0.0292431
arahy.ULYV8E	ZH16_S3_vs_ZH6_S3;ZH16_S4_vs_ZH6_S4	--	E3 ubiquitin protein ligase DRIP2-like [Glycine max]	0.236172	0.348079	1.22296	1.40557	0.192197	0.308968	0.20932	0.129165
arahy.CT3EY6	ZH16_S2_vs_ZH6_S2;ZH16_S4_vs_ZH6_S4	--	dicer-like 4	0.718346	39.3894	1.19094	6.57436	0.251215	1.06693	0	0
arahy.8BBS1S	ZH16_S2_vs_ZH6_S2;ZH16_S4_vs_ZH6_S4	--	3-methyl-2-oxobutanoate hydroxymethyltransferase	0.250565	1.36895	1.23346	2.22154	0.0481049	0.0999353	0.217126	0.0395288
arahy.KG0R3Z	;ZH16_S3_vs_ZH6_S3;ZH16_S4_vs_ZH6_S4	TALE	homeobox protein knotted-1-like 3-like isoform X4 [Glycine max]	0.796042	1.06262	2.76558	3.72195	1.17235	3.14945	1.10452	0.387903
arahy.N9YQYJ	ZH16_S1_vs_ZH6_S1;ZH16_S2_vs_ZH6_S2	--	Ulp1 protease family, carboxy-terminal domain protein	0.888582	1.19955	0.335621	0.544952	0.0401943	0	0	0
arahy.R0JQVD	ZH16_S1_vs_ZH6_S1;ZH16_S2_vs_ZH6_S2	--	CMP/dCMP deaminase zinc-binding protein n=7 Tax=Clostridium thermocellum RepID=A3DID8_CLOTH	3.87445	2.05632	0.295435	1.28508	0.703333	0.187804	0.183073	0
arahy.Q30CKZ	ZH16_S2_vs_ZH6_S2;ZH16_S3_vs_ZH6_S3	--	DNA binding	8.9473	13.9251	9.946	8.11377	5.33474	5.51404	4.65047	4.75208
arahy.LW3E0N	ZH16_S1_vs_ZH6_S1;ZH16_S2_vs_ZH6_S2	--	DNA repair protein XRCC2 homolog isoform X4 [Glycine max]	1.17308	10.1037	1.54013	2.24884	0	0.0332234	0.17324	0.14385
arahy.5F74S8	ZH16_S1_vs_ZH6_S1;ZH16_S2_vs_ZH6_S2	--	Unknown protein	9.43356	35.0279	20.2052	21.306	3.49421	15.1178	11.1578	9.99043
arahy.Z8IK7E	ZH16_S2_vs_ZH6_S2;ZH16_S4_vs_ZH6_S4	--	U-box domain-containing protein 33-like isoform X3 [Glycine max]	0.975713	3.98889	0.632753	1.85878	0.152959	0.121864	0.0230132	0
arahy.HH3FWD	ZH16_S2_vs_ZH6_S2;ZH16_S4_vs_ZH6_S4	--	ATP-dependent zinc metalloprotease FTSH 12, chloroplastic-like [Glycine max]	0.382602	5.60611	0.405273	1.07596	0.0507718	0.0743618	0	0
Novel04369	ZH16_S2_vs_ZH6_S2;ZH16_S4_vs_ZH6_S4	--	PREDICTED: LOW QUALITY PROTEIN: uncharacterized protein LOC103343662 [Prunus mume]	0.203932	2.57213	1.18309	2.00736	0.129471	0.769065	0.711	0.642432
arahy.W4S514	ZH16_S3_vs_ZH6_S3;ZH16_S4_vs_ZH6_S4	--	beta-carotene hydroxylase 2	191.684	1.41101	4.08288	2.19005	100.557	1.16088	0.964476	0.292209
Novel00602	ZH16_S2_vs_ZH6_S2;ZH16_S4_vs_ZH6_S4	--	hypothetical protein MTR_5g023720 [Medicago truncatula]>gi|355513650|gb|AES95273.1| Ulp1 protease family, carboxy-terminal domain protein [Medicago truncatula]	1.64126	25.8793	5.66828	5.17861	1.0266	4.24419	1.8157	0.417635
arahy.N25L3F	ZH16_S1_vs_ZH6_S1;ZH16_S2_vs_ZH6_S2	--	tRNA guanosine-2'-O-methyltransferase TRM13-like protein	3.49339	6.46139	2.89145	3.12244	1.05559	2.91857	2.69563	1.53532
arahy.LCEB5E	ZH16_S1_vs_ZH6_S1;ZH16_S4_vs_ZH6_S4	--	Ulp1 protease family, carboxy-terminal domain protein	2.09029	0.894879	0.400702	0.60796	0.107233	0.183937	0.0677571	0
Novel01842	ZH16_S1_vs_ZH6_S1;ZH16_S2_vs_ZH6_S2	--	hypothetical protein MTR_5g023720 [Medicago truncatula]>gi|355513650|gb|AES95273.1| Ulp1 protease family, carboxy-terminal domain protein [Medicago truncatula]	1.67868	1.88677	0.293533	0.108455	0.0110172	0.0140768	0.134252	0
arahy.9B6JUI	ZH16_S2_vs_ZH6_S2;ZH16_S3_vs_ZH6_S3	--	glycoside hydrolase family 81 protein	0.128766	2.21037	0.517935	0.0613154	0.115667	0.0616727	0	0
arahy.BD12A0	ZH16_S2_vs_ZH6_S2;ZH16_S4_vs_ZH6_S4	--	glycine-rich RNA-binding protein 3	0.247447	3.77946	0.733536	2.39674	0	0.0301087	0.0392497	0
arahy.996DKV	ZH16_S1_vs_ZH6_S1;ZH16_S2_vs_ZH6_S2	--	2-hydroxyacyl-CoA lyase-like [Glycine max]	5.12654	13.8872	4.02747	6.72952	0.361299	1.90829	0.642505	0.583036
arahy.9CR96V	ZH16_S1_vs_ZH6_S1;ZH16_S3_vs_ZH6_S3	--	3-methyl-2-oxobutanoate hydroxymethyltransferase	3.51702	1.71432	1.39991	1.08949	0.182383	0.442092	0.278604	0.132266
arahy.GS6JIA	ZH16_S3_vs_ZH6_S3;ZH16_S4_vs_ZH6_S4	--	Cytochrome P450 superfamily protein	0.0419606	0.133505	5.69324	7.93542	0.328128	0.181762	1.53133	1.04245
arahy.U482D3	ZH16_S3_vs_ZH6_S3;ZH16_S4_vs_ZH6_S4	--	Pentatricopeptide repeat (PPR-like) superfamily protein	5.03772	6.54622	3.45261	3.86842	0.982899	1.01069	0.345539	0.0725901
arahy.XPR4K7	;ZH16_S3_vs_ZH6_S3;ZH16_S4_vs_ZH6_S4	--	ATP-binding ABC transporter	2.35086	0.582258	2.17777	1.11287	5.34975	1.86376	0.642644	0.333669
Novel01652	;ZH16_S2_vs_ZH6_S2;ZH16_S4_vs_ZH6_S4	--	uncharacterized protein LOC100527571 precursor [Glycine max]>gi|255632657|gb|ACU16680.1| unknown [Glycine max]	0	24.4624	19.9663	39.6794	0.637295	6.30876	9.17413	4.31985
arahy.Y8MDWH	ZH16_S1_vs_ZH6_S1;ZH16_S2_vs_ZH6_S2	--	ketose-bisphosphate aldolase class-II family protein	9.41331	34.4937	15.0512	10.3327	2.94227	12.3922	6.53997	8.79246
arahy.XYZ5FS	ZH16_S1_vs_ZH6_S1;ZH16_S2_vs_ZH6_S2	--	hypothetical protein	0.808468	9.18467	1.39148	4.10146	0.0389921	1.16295	2.47266	1.71074
arahy.B993CM	ZH16_S1_vs_ZH6_S1;ZH16_S2_vs_ZH6_S2	--	Unknown protein	22.2269	167.325	3.35834	1.54167	8.08926	57.247	7.80285	1.2411
arahy.4H8VJF	ZH16_S2_vs_ZH6_S2;ZH16_S4_vs_ZH6_S4	--	ATP phosphoribosyl transferase 2	2.4139	6.02349	1.7955	3.98945	0.199311	0	0.419795	0
arahy.B3UXS8	ZH16_S1_vs_ZH6_S1;ZH16_S2_vs_ZH6_S2	--	2-oxoglutarate (2OG) and Fe(II)-dependent oxygenase superfamily protein	1.50374	4.03553	0.418625	0.293726	0.201262	0.290055	0	0.11263
Novel04557	ZH16_S1_vs_ZH6_S1;ZH16_S2_vs_ZH6_S2	--	hypothetical protein POPTR_0001s40220g [Populus trichocarpa]>gi|550349334|gb|ERP66724.1| hypothetical protein POPTR_0001s40220g [Populus trichocarpa]	0.883048	4.26204	2.82073	3.58564	0.221417	1.03952	2.34669	3.31292
arahy.W35MPH	;ZH16_S3_vs_ZH6_S3;ZH16_S4_vs_ZH6_S4	--	Unknown protein	922.712	21.4063	55.9705	37.0809	1035.75	53.1364	24.0965	9.63223
Novel02176	ZH16_S2_vs_ZH6_S2;ZH16_S4_vs_ZH6_S4	--	hypothetical protein VITISV_003778 [Vitis vinifera]	0.530592	2.01951	1.12079	1.48336	0.19561	0.557311	0.33401	0
arahy.SK3TPA	;ZH16_S3_vs_ZH6_S3;ZH16_S4_vs_ZH6_S4	--	Water-selective transport intrinsic membrane protein 1 n=1 Tax=Lotus japonicus RepID=Q9LKJ6_LOTJA	447.822	43.587	109.903	40.5895	475.511	90.1022	41.5132	18.4639
arahy.IY6VBP	ZH16_S2_vs_ZH6_S2;ZH16_S3_vs_ZH6_S3	--	UDP-Glycosyltransferase superfamily protein	1.85414	1.08754	0.523808	0.355205	0.238495	0.00990919	0	0
arahy.JP6KD0	ZH16_S3_vs_ZH6_S3;ZH16_S4_vs_ZH6_S4	--	Eukaryotic aspartyl protease family protein	0.794004	0	4.66318	2.73426	0.500652	0.0147269	0.05119	0.0349508
arahy.I5BQLG	ZH16_S2_vs_ZH6_S2;ZH16_S4_vs_ZH6_S4	--	Unknown protein	2.4015	17.9315	5.01601	5.20515	1.04424	4.87748	2.56042	0.760582
Novel01380	ZH16_S2_vs_ZH6_S2;ZH16_S4_vs_ZH6_S4	--	--	0.37068	4.19804	0.76623	3.0691	0.0859553	0.126312	0.288196	0.0302705
arahy.AF6NZ2	ZH16_S2_vs_ZH6_S2;ZH16_S4_vs_ZH6_S4	--	1-phosphatidylinositol-3-phosphate 5-kinase FAB1B-like isoform X3 [Glycine max]	0.465786	3.93932	1.56479	2.52769	0.281463	0.287263	0.315934	0.273172
arahy.KD9PJ3	ZH16_S2_vs_ZH6_S2;ZH16_S3_vs_ZH6_S3	--	F-box protein interaction domain protein	0.53045	2.69266	0.88504	0.612762	0.116576	0.101265	0.0526128	0
arahy.39ZYJP	ZH16_S3_vs_ZH6_S3;ZH16_S4_vs_ZH6_S4	--	dehydration-responsive protein RD22	47.8543	17.5776	9.00846	20.602	43.4149	11.0838	3.32647	5.32341
arahy.D7DDVZ	ZH16_S1_vs_ZH6_S1;ZH16_S2_vs_ZH6_S2	--	ATP-dependent zinc metalloprotease FTSH protein	2.54708	9.78209	1.69955	0.918267	1.30665	3.36476	1.37141	0.175423
arahy.PUMP6L	ZH16_S3_vs_ZH6_S3;ZH16_S4_vs_ZH6_S4	--	phenylalanine ammonia-lyase 2	31.7479	22.728	11.7855	1.79365	53.8779	38.9285	5.31782	0.626287
arahy.NNH8AZ	ZH16_S1_vs_ZH6_S1;ZH16_S2_vs_ZH6_S2	--	zinc ion binding	1.01567	0.70858	0.11955	0.159857	0.0122793	0	0	0
arahy.IM4NH0	;ZH16_S2_vs_ZH6_S2;ZH16_S3_vs_ZH6_S3	--	Protein kinase superfamily protein	2.93631	2.51623	1.02394	0.367315	7.09014	0.822642	0.34002	0.0442181
Novel04863	ZH16_S3_vs_ZH6_S3;ZH16_S4_vs_ZH6_S4	--	--	1.60858	2.20885	3.53186	4.79599	0.447432	0.170704	0	0
arahy.LJEZ0V	ZH16_S2_vs_ZH6_S2;ZH16_S3_vs_ZH6_S3	--	leguminosin group485 secreted peptide	124.773	21.441	16.4069	2.43977	196.712	4.43334	1.20476	0.355698
arahy.5F4UJS	ZH16_S1_vs_ZH6_S1	--	glutaredoxin 4	13.172	1.06004	0.395345	0.199242	0.344094	4.60448	0.47281	5.23329
arahy.63ATS7	ZH16_S2_vs_ZH6_S2	--	nodulin MtN21 /EamA-like transporter family protein	0.0258892	32.3309	2.5805	1.20944	0.0973803	8.92221	1.81059	1.11331
arahy.IK7GC2	ZH16_S1_vs_ZH6_S1	--	proline-rich protein 4-like [Glycine max]	21.1963	0.025189	0.328035	0	4.74269	0.0180349	0	0
arahy.21U9AI	ZH16_S3_vs_ZH6_S3	--	subtilisin-like serine protease 2	0.0806655	0.14826	4.03936	1.03891	0.102185	0.263902	0.711024	0.62678
Novel03320	ZH16_S4_vs_ZH6_S4	--	PREDICTED: trafficking protein particle complex subunit 11 isoform X1 [Cicer arietinum]	6.42553	5.65642	4.30178	4.55795	2.69031	4.51666	1.6381	0.657334
arahy.RN7KHK	;ZH16_S3_vs_ZH6_S3	--	xyloglucan endotransglucosylase/hydrolase 9	1.65122	2.63487	1.42763	0.662607	4.17436	1.24916	0.439437	0.358734
arahy.XK2NFV	;ZH16_S4_vs_ZH6_S4	--	protein notum homolog isoform X2 [Glycine max]	0.0237292	140.538	72.7564	45.4808	0.565613	119.424	41.1151	18.8247
arahy.0VLU0L	ZH16_S2_vs_ZH6_S2	--	arogenate dehydrogenase	0.0632868	0.990547	0.823172	0.877943	0.0345758	0	0.0234091	0
arahy.48I8DT	ZH16_S3_vs_ZH6_S3	bHLH	basic helix-loop-helix (bHLH) DNA-binding superfamily protein	0.366179	2.96449	1.88157	0.32778	0.176034	0.846771	0.192952	0.1131
Novel02257	ZH16_S3_vs_ZH6_S3	--	PREDICTED: UPF0496 protein At4g34320-like [Glycine max]	1.82128	1.5113	3.30395	0.589234	1.90399	0.574323	0.679888	0.281219
arahy.RMBA11	ZH16_S1_vs_ZH6_S1	--	hypothetical protein	68.5122	2.29422	0.110656	0	22.4123	0.877709	0.241894	0
arahy.C1FJC6	ZH16_S1_vs_ZH6_S1	--	CAAX amino terminal protease family protein	16.6166	6.07723	6.89767	3.86539	7.36647	7.02951	7.55638	5.37649
arahy.DDY9I8	ZH16_S1_vs_ZH6_S1	--	ATP-citrate synthase (ATP-citrate (Pro-S-)-lyase) n=2 Tax=Nautiliaceae RepID=B9L917_NAUPA	12.1488	12.2947	2.2037	0.72132	5.52485	7.4929	1.9885	0.563704
arahy.7NM92S	ZH16_S4_vs_ZH6_S4	--	UNC-50 family protein	19.6104	16.1105	5.22647	7.97302	11.4512	8.5966	4.10733	3.61451
arahy.MQY6TT	ZH16_S1_vs_ZH6_S1	G2-like	two-component response regulator-like APRR2-like isoform X2 [Glycine max]	78.4792	3.40974	3.39483	1.40526	19.9474	3.90983	3.80456	1.52279
arahy.9SCD6T	;ZH16_S4_vs_ZH6_S4	TALE	homeobox protein knotted-1-like 3-like isoform X1 [Glycine max]	4.23415	5.12286	10.5011	7.07785	8.67678	6.37721	6.593	3.41664
arahy.68HMAV	;ZH16_S3_vs_ZH6_S3	--	xyloglucan endotransglucosylase/hydrolase 32	1.21932	42.2103	128.233	53.4302	5.86443	62.1039	60.416	26.9269
arahy.G8SY23	ZH16_S4_vs_ZH6_S4	--	beta-galactosidase 7	0.0336529	115.864	25.248	4.06107	0.034627	103.436	16.0645	0.852071
arahy.4559ZH	ZH16_S1_vs_ZH6_S1	--	transcription initiation factor TFIID protein, putative	2.79902	0.484818	0.82926	0.487912	0.483696	1.92016	0.97434	1.20564
arahy.S79ATY	ZH16_S2_vs_ZH6_S2	--	alpha-1,4-glucan-protein synthase [UDP-forming]-like protein	1.24655	5.08664	1.68514	0.31613	0.844435	0.184429	0.21006	0
arahy.6D1JC0	ZH16_S4_vs_ZH6_S4	--	Ran binding protein 7 n=1 Tax=Thalassiosira pseudonana RepID=B8C038_THAPS	6.23335	5.91034	1.94869	2.51094	1.50611	5.80878	0.283985	0.113721
arahy.PA1DXY	ZH16_S3_vs_ZH6_S3	--	tryptophan synthase beta chain	11.4635	0.0447697	0.825881	0.0330593	14.5288	0.0856802	0	0
arahy.SVWC8K	ZH16_S1_vs_ZH6_S1	--	sister chromatid cohesion 1 protein 4	0.274734	0.255203	0.581836	0.316884	0.0540943	0.351175	0.629213	0.293694
arahy.89FLHR	ZH16_S1_vs_ZH6_S1	--	Amino acid dehydrogenase family protein	11.5436	4.70676	1.72378	1.11164	5.26413	6.18593	1.9744	1.3783
arahy.XXCQ6D	ZH16_S1_vs_ZH6_S1	--	proline-rich protein 4-like [Glycine max]	15.8171	0.0252253	0.257349	0	3.07116	0.0482762	0	0
arahy.SDG4EV	ZH16_S2_vs_ZH6_S2	--	dentin sialophosphoprotein-like isoform X1 [Glycine max]	0.160328	2.14677	0.554886	0.319178	0.0801216	0.041612	0.0271227	0
Novel02285	ZH16_S2_vs_ZH6_S2	--	--	0.124824	1.40374	0.285987	0.338677	0.0884781	0.048223	0	0
arahy.6X8TD8	ZH16_S4_vs_ZH6_S4	--	ATP binding	0.107798	0.344845	0.204278	0.496633	0.175589	0.17028	0.104006	0.0944909
arahy.6NV05N	ZH16_S2_vs_ZH6_S2	--	xyloglucan endotransglucosylase/hydrolase 9	7.13359	32.6989	2.16131	0.633382	5.8173	5.92606	1.67508	0.378738
arahy.E5IT1X	ZH16_S4_vs_ZH6_S4	--	uncharacterized protein LOC100808415 isoform X4 [Glycine max]	1.479	1.09524	0.553895	0.559065	1.10431	0.81911	0.3368	0.0806798
arahy.W3GPPR	ZH16_S1_vs_ZH6_S1	--	2-phosphoglycerate kinase	2.00697	0.83377	17.5563	23.1311	0.812293	0.821402	17.6	20.3317
arahy.I266YZ	ZH16_S2_vs_ZH6_S2	--	CST complex subunit CTC1-like isoform X1 [Glycine max]	0.943984	0.943863	0.104784	0.136727	0.649967	0.226563	0.11969	0.0738572
arahy.913J1N	;ZH16_S2_vs_ZH6_S2	--	lysine ketoglutarate reductase trans-splicing-like protein	0.708164	9.2657	1.02907	0.754038	2.00267	2.69693	1.38082	0.671657
arahy.I7Y4WF	ZH16_S4_vs_ZH6_S4	--	Pathogenesis-related thaumatin superfamily protein	210.09	2.93002	2.82626	1.75969	174.111	5.11046	2.73439	0.282338
arahy.RRYY0T	ZH16_S2_vs_ZH6_S2	--	hypothetical protein	3.56093	4.02524	0.988869	0.948137	0.644829	0.280432	0.0905441	0
arahy.RL0N5R	ZH16_S2_vs_ZH6_S2	--	Disease resistance protein (TIR-NBS-LRR class) family	0.68843	4.09022	1.48813	1.2083	0.520377	1.57129	0.849833	0.614049
arahy.GFGJ54	ZH16_S2_vs_ZH6_S2	--	disease resistance protein (TIR-NBS-LRR class), putative	3.04724	3.00887	0.838757	0.853089	2.95729	1.3638	1.00546	0.893598
arahy.G182GH	ZH16_S2_vs_ZH6_S2	--	Unknown protein	24.3675	1.3541	0.533309	0.372767	25.5668	0	0.0946543	0
Novel04139	ZH16_S2_vs_ZH6_S2	--	unknown [Glycine max]	0	2.64365	1.56702	1.13339	0.0514213	0	0.0696285	0
arahy.EBSD6D	;ZH16_S3_vs_ZH6_S3	HD-ZIP	Homeobox-leucine zipper protein family	2.38549	0.487781	9.88886	8.02946	9.70883	1.27267	3.98626	4.05878
arahy.ZRTB0J	ZH16_S3_vs_ZH6_S3	TALE	BEL1-like homeodomain protein 1-like isoform X4 [Glycine max]	75.6677	3.05607	6.05686	3.72022	89.6284	3.67545	2.7251	1.91743
arahy.L9K6IL	;ZH16_S3_vs_ZH6_S3	--	Protein of unknown function (DUF1685)	43.0922	3.19487	13.8349	5.23313	60.3872	9.8166	4.78884	3.55487
arahy.UPMC5B	ZH16_S2_vs_ZH6_S2	--	Unknown protein	2320.17	618.287	807.338	355.053	1429.02	278.211	468.828	247.745
arahy.P8YRGA	ZH16_S2_vs_ZH6_S2	AUX/IAA	indole-3-acetic acid inducible 9	68.4906	881.513	56.6102	23.48	57.0192	357.271	80.7146	18.9323
arahy.6Z9P98	ZH16_S4_vs_ZH6_S4	--	protein N-lysine methyltransferase METTL21A-like isoform X2 [Glycine max]	5.85144	30.434	12.2222	12.7476	5.15712	13.5879	8.06607	3.13176
arahy.XN5C49	;ZH16_S4_vs_ZH6_S4	bHLH	basic helix-loop-helix (bHLH) DNA-binding superfamily protein	2.09623	22.0438	36.5146	12.0879	4.85204	36.0382	18.3268	3.00474
arahy.RQMQ3S	ZH16_S2_vs_ZH6_S2	--	Peroxidase superfamily protein	5.47966	15.7047	3.13284	5.28156	4.2562	6.8603	4.92918	7.37476
arahy.JU9HZZ	;ZH16_S2_vs_ZH6_S2	--	blue copper protein-like [Glycine max]	0.28679	1.99299	3.35674	4.08289	3.15564	0.543468	5.06915	7.51067
arahy.W8JU8M	ZH16_S1_vs_ZH6_S1	--	Cyclin-dependent kinase inhibitor family protein	19.1555	0.436429	3.9154	2.81277	8.62953	1.30077	4.19311	2.8646
arahy.RT1NLW	ZH16_S4_vs_ZH6_S4	--	phosphatidylinositol N-acetylglucosaminyltransferase gpi3 subunit-like isoform X1 [Glycine max]	7.127	15.6021	7.14659	8.37327	5.40768	10.2945	4.10749	2.49917
arahy.B36403	ZH16_S1_vs_ZH6_S1	--	cysteine synthase D1	7.92133	5.36933	4.80166	3.87669	3.7874	4.62586	3.2202	2.20796
arahy.S5VL8K	ZH16_S3_vs_ZH6_S3	--	Unknown protein	0.187841	2.61392	1.91541	2.61418	0.0513119	0.195765	0	0
arahy.88X2TA	ZH16_S2_vs_ZH6_S2	--	disease resistance protein (TIR-NBS-LRR class), putative	0.0585254	1.76651	0.297461	0.294386	0.0617978	0.0440246	0.0139465	0.0485513
arahy.74NP28	ZH16_S4_vs_ZH6_S4	--	Acyl-CoA thioesterase family protein	1.87319	1.57794	2.37241	2.36114	2.39419	0.990357	1.378	0.741909
Novel04597	ZH16_S2_vs_ZH6_S2	--	hypothetical protein CICLE_v10026935mg [Citrus clementina]>gi|557529901|gb|ESR41151.1| hypothetical protein CICLE_v10026935mg [Citrus clementina]	1.32711	210.523	350.437	316.993	1.74812	48.4488	311.089	395.038
arahy.1N0TT5	ZH16_S1_vs_ZH6_S1	--	cytochrome c-2	251.293	4.56994	2.98562	0.734909	116.657	5.22633	1.66975	0.642969
arahy.43G8Y5	;ZH16_S3_vs_ZH6_S3	AUX/IAA	Transmembrane amino acid transporter family protein	8.80753	4.44409	11.1355	1.51569	26.8353	7.73735	4.64496	1.90475
Novel01085	ZH16_S1_vs_ZH6_S1	--	--	0.27095	1.66569	0.158053	0.0136261	0	0.622443	0.21207	0
arahy.VU3YHT	ZH16_S2_vs_ZH6_S2	--	RING/FYVE/PHD zinc finger superfamily protein	0.483147	0.780087	0.243256	0.231762	0.0513119	0	0	0
arahy.0J0NIM	ZH16_S2_vs_ZH6_S2	--	uncharacterized protein LOC100778164 isoform X3 [Glycine max]	0.948171	5.55934	1.04425	1.49924	0.0793309	0.0506813	0.10742	0
arahy.M0AD1K	;ZH16_S3_vs_ZH6_S3	--	monomeric form sarcosine oxidase	46.1175	1.0208	10.7141	12.4931	47.8268	2.44839	5.34049	7.31137
arahy.E28A1S	ZH16_S1_vs_ZH6_S1	--	Protein of unknown function, DUF538	6.44286	23.4576	3.04621	0.278742	1.95885	19.2736	2.8132	0
arahy.7H823S	ZH16_S4_vs_ZH6_S4	--	SPIRAL1-like1	89.4802	92.6368	110.665	83.8327	107.707	101.55	67.0265	36.5684
Novel03689	ZH16_S3_vs_ZH6_S3	--	hypothetical protein PHAVU_002G078300g [Phaseolus vulgaris]>gi|561030962|gb|ESW29541.1| hypothetical protein PHAVU_002G078300g [Phaseolus vulgaris]	7.76462	1.98007	2.33408	1.36999	13.9491	2.31692	0.981938	0.978899
arahy.KG9X9B	ZH16_S3_vs_ZH6_S3	--	COP1-interacting protein 7	20.7016	7.36701	14.8495	8.78332	19.8309	8.53861	6.62549	4.56622
Novel00542	ZH16_S3_vs_ZH6_S3	--	Pentatricopeptide repeat-containing protein [Medicago truncatula]>gi|355492879|gb|AES74082.1| PPR containing plant-like protein [Medicago truncatula]	1.04178	3.13245	2.00627	1.0923	0.71721	2.61456	0.905493	1.09915
arahy.40Y6RI	ZH16_S1_vs_ZH6_S1	--	ATP-dependent Clp protease ATP-binding subunit	0.499843	0.336798	0.0241269	0.0430922	0.0651543	0.549542	0.117199	0
arahy.TLT49F	ZH16_S3_vs_ZH6_S3	--	Oxalyl-CoA decarboxylase n=4 Tax=Methylobacterium RepID=B1M0K8_METRJ	3.87501	1.69195	4.22621	0	0.60041	0.795678	0	0.842095
arahy.RJK860	ZH16_S3_vs_ZH6_S3	--	protein notum homolog isoform X3 [Glycine max]	587.808	41.3492	81.0685	45.7795	334.505	36.0028	34.8426	23.5139
arahy.Y4YZQQ	ZH16_S2_vs_ZH6_S2	--	heat shock protein 21	0.209814	28.5414	1.59443	0.401697	0.0742049	10.2903	2.26626	0.780342
arahy.Y5BWXR	ZH16_S2_vs_ZH6_S2	--	1-aminocyclopropane-1-carboxylate oxidase 5-like [Glycine max]	20.2973	6.53679	0.503805	0.560647	13.7007	2.64997	0.753277	0.0514284
arahy.4R2B5R	ZH16_S2_vs_ZH6_S2	--	O-acyltransferase (WSD1-like) family protein	0.15587	1.20713	0.157877	0.4972	0.271405	0.106615	0	0
Novel00882	ZH16_S1_vs_ZH6_S1	--	PREDICTED: sugar transport protein 14-like [Cicer arietinum]	2.72699	56.2509	5.21321	2.02788	1.23318	30.5845	7.29815	1.40324
arahy.1YW1H4	ZH16_S4_vs_ZH6_S4	--	probable pectinesterase/pectinesterase inhibitor 40-like [Glycine max]	0.062235	87.1671	38.0234	8.7202	0.0264303	80.8692	21.1717	3.61383
arahy.ZLNV7B	ZH16_S3_vs_ZH6_S3	--	vacuolar iron transporter homolog 2-like [Glycine max]	0.953097	3.96824	8.46282	3.87023	0.499782	5.78669	3.47408	3.34354
Novel04159	ZH16_S2_vs_ZH6_S2	--	--	0.121424	2.29295	0.858522	0.821097	0.422528	0.0827653	0.0586753	0
arahy.V2HZSR	ZH16_S3_vs_ZH6_S3	--	enolase-phosphatase E1-like isoform X1 [Glycine max]	55.3595	19.3536	16.8296	11.326	51.8841	23.5385	6.66134	7.57506
arahy.H5386A	ZH16_S3_vs_ZH6_S3	--	uncharacterized protein LOC100780609 isoform X4 [Glycine max]	4.83814	2.96073	3.22621	2.18929	5.13576	2.66066	1.53732	1.62354
arahy.6BVJ0B	ZH16_S4_vs_ZH6_S4	--	nutrient reservoir protein, putative	15.9489	23.4762	11315.1	45796.5	9.64946	14.2866	6540.17	9594.07
arahy.6FX8FC	ZH16_S1_vs_ZH6_S1	--	Ribosomal protein L24e family protein	23.7589	4.9525	4.05878	2.18264	1.67106	43.4825	4.95817	3.11216
arahy.G92E3R	ZH16_S3_vs_ZH6_S3	--	lipid transfer protein 12	0	0	4.96861	5.90056	0	0.0349866	0.653701	2.23298
Novel01394	ZH16_S2_vs_ZH6_S2	--	hypothetical protein JCGZ_01704 [Jatropha curcas]	0.988622	2.31683	1.05895	0.857412	0.24474	0	0.0340874	0
arahy.XH5ZLH	ZH16_S1_vs_ZH6_S1	--	SPX domain gene 1	225.544	3.16223	3.53951	2.10212	99.7688	3.29538	1.82276	1.49408
arahy.71E5Q9	ZH16_S1_vs_ZH6_S1	--	glycerol-3-phosphate acyltransferase 6	163.088	0.104468	0.0672732	0.044645	73.2637	0.0152621	0.0431274	0.112613
arahy.IM4TI7	ZH16_S4_vs_ZH6_S4	--	peptidyl-prolyl cis-trans isomerases	2.77057	31.5393	10.2643	8.8996	2.53203	23.184	7.05995	3.56525
arahy.AE6IJA	ZH16_S1_vs_ZH6_S1	TF	AP2-like ethylene-responsive transcription factor At2g41710-like [Glycine max]	3.75529	6.74481	12.8272	18.0367	1.51545	5.76607	13.2882	12.0522
arahy.SNS0I7	ZH16_S4_vs_ZH6_S4	--	Chalcone-flavanone isomerase family protein	0.525181	25.5369	13.9551	3.56124	1.12789	33.6078	7.74496	0.607714
arahy.9KCZ17	ZH16_S2_vs_ZH6_S2	--	preprotein translocase subunit SecA	3.56565	10.5869	3.83676	4.52465	3.41108	4.51725	4.28422	3.42261
arahy.275AW9	ZH16_S1_vs_ZH6_S1	--	Glycoprotein membrane precursor GPI-anchored	24.1255	9.05037	6.28736	3.20729	10.9662	5.33644	5.22761	3.73616
arahy.NPC14S	ZH16_S4_vs_ZH6_S4	--	probable glycosyltransferase isoform X4 [Glycine max]	64.2072	7.66164	1.97965	1.64071	43.748	7.22833	1.23179	0.638198
Novel04282	ZH16_S2_vs_ZH6_S2	--	putative endonuclease/exonuclease/phosphatase [Arachis duranensis]	0.25658	12.1809	1.50757	1.42642	0.305289	2.00576	0.905746	0.434941
arahy.U5NVVR	ZH16_S2_vs_ZH6_S2	--	vesicle associated protein	23.4292	4.07859	1.02069	0.35664	16.9861	0.998607	0.788494	0.105038
arahy.P3FI0J	ZH16_S3_vs_ZH6_S3	--	GDSL-like Lipase/Acylhydrolase superfamily protein	8.48682	0.0954451	3.89868	0.0392115	5.90314	0.0996669	0.310674	0
arahy.7R0WL5	ZH16_S2_vs_ZH6_S2	TF	heat shock transcription factor B4	0.21679	16.548	0.438298	0.586539	0.495284	4.04009	1.05183	0.673427
arahy.JLWB2C	ZH16_S2_vs_ZH6_S2	--	nitrate transporter 1.7	0	23.0708	0.0515595	0	0	5.97221	0.763937	0
arahy.ZLR49S	ZH16_S1_vs_ZH6_S1	--	Iron ion binding / oxidoreductase/ oxidoreductase protein n=1 Tax=Genlisea aurea RepID=S8C9J7_9LAMI	11.1276	1.67576	1.57871	1.02717	4.01976	0.680225	1.76732	1.00476
arahy.TK9VLP	ZH16_S3_vs_ZH6_S3	--	auxin transporter-like protein 2-like isoform X1 [Glycine max]	2.19649	3.58051	4.41687	2.64661	4.33377	2.52929	1.89555	2.25628
arahy.QM99BA	ZH16_S1_vs_ZH6_S1	--	cytokinin oxidase/dehydrogenase 1	31.2991	2.18117	0.332029	0.0654361	10.5512	2.52871	0.513627	0
arahy.RRD2QF	ZH16_S1_vs_ZH6_S1	--	stem-specific protein TSJT1-like [Glycine max]	169.428	6.94764	53.1641	16.933	68.0662	8.25819	39.6822	18.0279
arahy.57CUP1	ZH16_S1_vs_ZH6_S1	--	elongation factor Tu GTP-binding domain protein	4.66021	7.16143	1.57999	2.31412	0.756578	6.89011	6.70719	5.76023
arahy.KLZ79N	ZH16_S3_vs_ZH6_S3	--	subtilisin-like serine protease 2	81.8758	8.63357	13.6435	8.38211	87.419	16.5092	5.69822	5.45053
arahy.ECU3UP	ZH16_S2_vs_ZH6_S2	--	Pentatricopeptide repeat (PPR) superfamily protein	0.117579	0.653339	0.192975	0.246253	0.0487993	0.0101378	0.0396468	0
arahy.00AX0T	ZH16_S2_vs_ZH6_S2	--	TOPLESS-related 2	0	11.8397	1.33636	0.919941	0.00679341	4.88829	1.10073	0.526179
arahy.U9DPEL	ZH16_S1_vs_ZH6_S1	--	alpha/beta-Hydrolases superfamily protein	29.2993	0.925145	2.78779	0	0.683744	2.31752	1.56115	0.577718
Novel01814	ZH16_S2_vs_ZH6_S2	--	transposon protein [Arachis hypogaea]	0.398018	3.00086	0.911368	1.67029	0.357323	0.731092	1.25507	1.64388
arahy.EXJG55	ZH16_S4_vs_ZH6_S4	--	Peroxidase superfamily protein	42.0205	19.066	27.2508	16.4524	54.4186	22.7193	16.5244	7.71423
arahy.BSX6ST	ZH16_S1_vs_ZH6_S1	--	Unknown protein	1.30712	1.73765	0.283752	0.386207	0.479503	0.985362	0.0916522	0.040048
arahy.RAI67U	ZH16_S2_vs_ZH6_S2	--	TdcA1-ORF1-ORF2 protein n=1 Tax=Medicago truncatula RepID=G7IGM2_MEDTR	0.248116	2.82757	0.982038	0.619279	0.0309982	0	0	0
arahy.E6G4NP	ZH16_S2_vs_ZH6_S2	--	Cytochrome P450 superfamily protein	0	34.7908	0.0303013	0	0	6.25485	0.745163	0
arahy.65I9D4	ZH16_S3_vs_ZH6_S3	--	Unknown protein	0	0.0413568	2.50564	0	0	0.00680349	0	0
arahy.HRUQ2D	ZH16_S4_vs_ZH6_S4	--	probable glycosyltransferase isoform X4 [Glycine max]	81.4076	7.60627	2.5514	3.20417	73.4548	8.64354	2.30586	1.51094
arahy.N21TUI	ZH16_S4_vs_ZH6_S4	--	beta galactosidase 1	24.0511	58.1153	15.1895	8.40349	35.4191	35.8647	13.1396	3.86792
arahy.IF8SZ4	ZH16_S3_vs_ZH6_S3	--	spermidine hydroxycinnamoyl transferase-like [Glycine max]	77.558	1.43967	4.56932	5.49302	42.0169	2.25417	1.94894	4.26555
arahy.K3K8ZL	;ZH16_S4_vs_ZH6_S4	--	alcohol dehydrogenase 1	147.273	20.9274	28.0945	10.4268	174.213	42.1046	18.2196	3.9427
arahy.8Y6YU2	ZH16_S2_vs_ZH6_S2	--	Unknown protein	0	75.5723	0.343068	0	0	5.04201	1.26204	0
arahy.1490SB	ZH16_S1_vs_ZH6_S1	--	acyl-CoA synthetase 5	44.6604	2.08774	1.1771	0.408689	20.5008	1.19939	1.21273	0.439465
arahy.3H63LQ	ZH16_S1_vs_ZH6_S1	--	alpha-amylase-like 3	0.502576	0.2613	0.0872618	0.0585812	0.055928	0.00828116	0	0
arahy.MID1KN	ZH16_S2_vs_ZH6_S2	--	NAD-dependent malic enzyme 1	17.5957	13.1387	1.00438	0.138324	22.2588	5.08456	0.750185	0.199619
arahy.2A3E3X	ZH16_S1_vs_ZH6_S1	--	beta glucosidase 11	3.56698	0.331567	0.0540097	0.0474017	0.372279	0.0154346	0.0201206	0
arahy.L9NF1I	ZH16_S1_vs_ZH6_S1	--	cationic amino acid transporter 5	4.51115	2.09928	0.373555	0.136552	2.03127	1.89707	0.307975	0.170133
arahy.K19J6A	ZH16_S1_vs_ZH6_S1	--	Unknown protein	6.02346	6.32553	2.13566	2.28809	1.24893	1.99461	1.28474	1.65162
arahy.MP3D3D	ZH16_S4_vs_ZH6_S4	TF	bHLH transcription factor	0.428427	14.47	4.01863	1.00852	0.31183	20.1754	3.37888	0.175471
arahy.HXC8TF	ZH16_S4_vs_ZH6_S4	--	calcium-transporting ATPase 4, plasma membrane-type protein	21.3556	7.51564	2.16458	1.27584	17.6184	9.02944	2.17353	0.489501
arahy.Y5S8CM	ZH16_S1_vs_ZH6_S1	--	subtilisin-like serine protease 3	1.67202	13.4782	0.178071	0	0.641004	18.5495	2.66056	0.0467467
arahy.03ZR4A	ZH16_S2_vs_ZH6_S2	--	ATP-dependent DNA helicase 2 subunit Ku80	0.34382	4.34816	2.20361	2.25427	0.242648	1.44012	1.45016	2.39442
arahy.91AYI4	ZH16_S4_vs_ZH6_S4	--	Unknown protein	2.46895	8.16296	8.03485	6.97492	0.990025	2.75335	1.93289	0.748446
arahy.A99G02	;ZH16_S3_vs_ZH6_S3	AUX/IAA	Transmembrane amino acid transporter family protein	7.12195	4.26734	6.45016	1.08568	25.489	4.90235	2.63519	1.0551
arahy.740L49	ZH16_S3_vs_ZH6_S3	--	Protein kinase superfamily protein	32.0978	8.14886	19.5601	8.74359	23.35	11.0918	9.85673	8.68189
arahy.WXZF1C	ZH16_S1_vs_ZH6_S1	--	nucleoside diphosphate kinase 3	50.4426	11.7279	1.38286	0.693276	23.4896	8.62634	2.19518	0.523072
arahy.P264ZS	ZH16_S1_vs_ZH6_S1	--	Class II aminoacyl-tRNA and biotin synthetases superfamily protein	2.2208	3.67349	2.11037	2.7218	0.918518	3.49059	2.77617	1.93724
arahy.I4AHF2	ZH16_S2_vs_ZH6_S2	--	xyloglucan endotransglucosylase/hydrolase 16	17.8881	26.6991	3.91649	1.81263	22.8495	11.2015	3.0304	1.63618
arahy.R06BW0	ZH16_S3_vs_ZH6_S3	--	sodium/calcium exchanger family protein / calcium-binding EF hand family protein	15.4395	5.01369	5.37072	0.707059	10.9939	5.25497	1.87494	0.360633
arahy.V0KD92	ZH16_S1_vs_ZH6_S1	--	Pentatricopeptide repeat (PPR) superfamily protein	1.89888	3.70766	2.0833	1.77199	0.898697	1.80549	1.08849	0.966362
arahy.XAYS0A	ZH16_S2_vs_ZH6_S2	--	RNA-binding protein Nova-2-like isoform X1 [Glycine max]	1.06877	1.56634	0.503134	0.688046	0.386919	0.318651	0.157029	0.0937203
arahy.57QH9P	ZH16_S2_vs_ZH6_S2	--	receptor-like kinase 1	0.146909	2.52228	0.345814	0.0303794	0	0.0455194	0	0
arahy.1IN0XH	ZH16_S1_vs_ZH6_S1	--	RING-H2 finger protein 2B	12.3976	0.0329462	0.208368	0.0683264	5.73335	0.186943	0.0733837	0.0609343
arahy.9W4G6J	ZH16_S2_vs_ZH6_S2	--	glutamine synthetase 1	0.693177	8.82092	3.81795	1.89914	0.723269	3.23577	3.17229	1.36086
arahy.TCII1L	ZH16_S2_vs_ZH6_S2	--	protein MOR1-like isoform X1 [Glycine max]	0.440291	2.8082	1.11163	1.19209	0.169739	0.368446	0.709875	0.277195
arahy.S8SU5Z	ZH16_S3_vs_ZH6_S3	--	LRR and NB-ARC domain disease resistance protein	1.00633	0.690624	3.23225	2.86161	0.572297	0.194265	0.836039	1.48493
arahy.A8YTMR	;ZH16_S3_vs_ZH6_S3	--	tryptophan synthase beta chain	8.68533	0.0821691	2.97984	0.0649546	15.6021	0.526862	0.343875	0.0260866
arahy.N6HXMD	ZH16_S2_vs_ZH6_S2	--	alpha-L-arabinofuranosidase 1	0.066321	388.658	1.89232	0.276335	0.153426	128.533	16.2928	0.290781
arahy.FQS251	ZH16_S1_vs_ZH6_S1	Orphans	zinc finger protein CONSTANS-LIKE 1-like [Glycine max]	8.33997	30.2726	7.64103	3.45722	4.05705	19.6676	7.12522	2.42588
arahy.XI5WK7	ZH16_S3_vs_ZH6_S3	--	3-ketoacyl-CoA synthase 11	38.3728	4.6316	5.61441	1.46124	57.2409	6.03044	2.58576	0.771181
arahy.B8P1X6	ZH16_S1_vs_ZH6_S1	--	PAR1 protein	8.95327	0.758536	0.631059	0.699382	2.90858	0.975932	0.421716	1.00364
Novel01040	ZH16_S1_vs_ZH6_S1	--	--	5.01289	2.03111	1.2615	0.683165	1.14934	0.396154	0.223058	0.0812176
arahy.3QXB2F	ZH16_S2_vs_ZH6_S2	--	Pentatricopeptide repeat (PPR) superfamily protein	0.760991	3.75938	2.35414	2.00617	0.363796	1.67429	1.53647	2.61565
arahy.0Q8MRK	ZH16_S2_vs_ZH6_S2	--	phosphoribosylamine-glycine ligase	0.232842	5.97741	0.119812	0.426189	0.220454	0.645857	0.340716	0.343248
arahy.LGQQ8W	ZH16_S3_vs_ZH6_S3	TF	myb transcription factor	13.9917	8.69921	14.4941	7.49632	7.97936	4.58808	4.46941	3.25999
arahy.PG0H7H	ZH16_S1_vs_ZH6_S1	--	Unknown protein	0.597129	0.291089	0.212848	0.129956	0.128816	0.110983	0.224125	0.160971
arahy.B4V8RG	ZH16_S1_vs_ZH6_S1	--	Pentatricopeptide repeat (PPR) superfamily protein	0.584107	0.910445	0.147826	0.0359948	0.00752233	0.338902	0.203702	0
Novel01036	ZH16_S2_vs_ZH6_S2	--	PREDICTED: uncharacterized protein LOC104109606 [Nicotiana tomentosiformis]	0.226843	2.61913	0.453308	0.726849	0.271478	0.42677	0.610589	0.158201
Novel03135	ZH16_S3_vs_ZH6_S3	--	hypothetical protein MTR_5g095330 [Medicago truncatula]>gi|355519110|gb|AET00734.1| hypothetical protein MTR_5g095330 [Medicago truncatula]	0.0156951	0.0280586	11.189	0.616141	0.0289081	0.0200656	0.0456655	0.154085
arahy.RIPR8S	ZH16_S1_vs_ZH6_S1	--	Werner Syndrome-like exonuclease-like [Glycine max]	1.90202	3.43381	2.61882	1.76213	0.441421	1.76535	1.72374	0.4289
arahy.4HJ0IT	ZH16_S1_vs_ZH6_S1	--	uncharacterized protein LOC100802738 [Glycine max]	8.7046	2.15678	2.77195	5.47202	4.0302	3.74695	3.862	6.0778
arahy.S73YF0	ZH16_S4_vs_ZH6_S4	--	uncharacterized protein LOC100783667 [Glycine max]	20.2552	6.19212	3.71334	3.57768	35.0635	7.64491	2.94691	1.71533
Novel04709	ZH16_S2_vs_ZH6_S2	--	PREDICTED: replication protein A 14 kDa subunit B-like [Glycine max]>gi|734414592|gb|KHN37423.1| hypothetical protein glysoja_013638 [Glycine soja]	2.11629	42.9152	3.12641	2.87847	1.83914	15.2298	4.62908	3.37159
arahy.AQ6B1J	;ZH16_S4_vs_ZH6_S4	--	anthocyanidin synthase [Glycine max]	0.101469	19.749	10.3529	2.20869	0.703799	29.4912	5.76059	0.323537
arahy.QKT796	ZH16_S2_vs_ZH6_S2	--	Unknown protein	3.28313	8.7469	2.20088	2.10826	3.16149	4.11822	2.69152	1.53269
arahy.GK3ID2	ZH16_S1_vs_ZH6_S1	--	inner membrane protease subunit-like protein	23.0615	13.6147	6.38543	6.82289	10.6742	15.2808	14.0419	10.5536
Novel03098	ZH16_S2_vs_ZH6_S2	--	PREDICTED: uncharacterized protein LOC101255289 [Solanum lycopersicum]	0.14705	1.73093	0.272067	0.44798	0.0169537	0	0	0
arahy.KND74I	ZH16_S2_vs_ZH6_S2	--	ycf20-like protein-like [Glycine max]	1.26712	2.91941	4.49175	2.00844	0.918013	0.912396	1.93926	1.01119
arahy.JJPF87	ZH16_S1_vs_ZH6_S1	--	Pathogenesis-related thaumatin superfamily protein	20.5902	1.65537	1.25918	0.197267	7.89539	3.46477	0.8009	0.0397667
arahy.6YRH08	ZH16_S2_vs_ZH6_S2	--	microtubule-associated protein 65-8	7.60605	4.00767	0.528036	0.237	4.52849	1.88838	0.621324	0.209483
Novel03775	ZH16_S1_vs_ZH6_S1	--	PREDICTED: subtilisin-like protease-like [Glycine max]	4.08329	25.0303	2.56263	1.65278	1.4792	33.7583	4.79239	2.17219
arahy.JQE858	ZH16_S2_vs_ZH6_S2	--	uncharacterized protein LOC100787145 isoform X9 [Glycine max]	0.0993486	3.4697	0.621039	0.555666	0.0647994	0.743429	0.178356	0.16198
arahy.BXY830	ZH16_S2_vs_ZH6_S2	--	probable xyloglucan glycosyltransferase 5-like [Glycine max]	9.78189	8.55204	2.60226	2.7975	5.79935	3.73792	2.19054	2.4683
arahy.H7SKKF	ZH16_S1_vs_ZH6_S1	--	GDSL esterase/lipase [Glycine max]	4.62025	11.1832	1.84506	0.879704	2.19782	11.144	2.17881	0.82531
arahy.VR6UAQ	ZH16_S4_vs_ZH6_S4	--	Unknown protein	1.26244	4.02047	1.5443	3.71142	0.609155	1.57377	0.663696	0.957731
arahy.9178ZA	ZH16_S3_vs_ZH6_S3	--	Transmembrane amino acid transporter family protein	7.82964	6.52734	5.46836	1.65849	8.08248	4.64453	2.70343	0.67759
Novel01343	ZH16_S2_vs_ZH6_S2	--	--	2.38891	10.4224	2.97842	2.94915	2.22868	4.10189	2.45665	3.69312
arahy.H82QG0	ZH16_S3_vs_ZH6_S3	--	Cytochrome P450 superfamily protein	10.5681	6.24635	63.8794	70.5251	19.0556	12.0349	25.3165	38.8272
arahy.E1RKLH	;ZH16_S3_vs_ZH6_S3	--	ATP-binding ABC transporter	0.621784	0.194675	0.353052	0.0748065	1.70114	0.568486	0.102668	0.0219905
arahy.W1M4EN	ZH16_S1_vs_ZH6_S1	--	phosphoenolpyruvate carboxylase 3	1.35807	1.00387	1.13651	0.799436	0.0613342	0.0850258	0.265764	0.110339
arahy.47SRJF	ZH16_S1_vs_ZH6_S1	--	ribonuclease 3	14.5756	13.4692	11.2987	16.4089	5.99766	10.2157	17.4494	16.0055
arahy.A77B5H	ZH16_S1_vs_ZH6_S1	Pseudo ARR-B	response regulator 2	35.705	32.0928	26.9429	43.5648	14.5706	23.9624	32.469	46.4845
arahy.CW2GVZ	ZH16_S1_vs_ZH6_S1	--	Calcium-binding EF-hand family protein n=1 Tax=Theobroma cacao RepID=UPI00042B2CE2	11.8678	3.97504	2.78503	2.83654	2.94349	3.25339	2.00677	1.94339
arahy.BHNE8U	ZH16_S1_vs_ZH6_S1	--	probable pectinesterase/pectinesterase inhibitor 36-like [Glycine max]	0.943385	17.7084	25.3443	47.8404	0.174097	18.5284	17.4367	53.4635
arahy.FRHN34	;ZH16_S4_vs_ZH6_S4	--	Membrane transporter D1 n=3 Tax=Andropogoneae RepID=B6U4Q3_MAIZE	10.8352	2.96402	3.92857	2.88458	24.5793	8.41345	3.71709	0.86279
arahy.347H2B	ZH16_S3_vs_ZH6_S3	--	xyloglucan endotransglucosylase/hydrolase 16	16.0619	32.3074	17.4547	3.61539	18.2858	28.0752	7.57968	1.79386
arahy.T6LAIA	;ZH16_S4_vs_ZH6_S4	--	GDSL-like Lipase/Acylhydrolase superfamily protein	5.49695	0	2.53787	1.59079	3.98318	0.343611	1.47773	0.297044
arahy.RX7YKY	ZH16_S1_vs_ZH6_S1	--	homocysteine S-methyltransferase 3	4.87997	3.64611	2.4272	2.01128	1.78341	3.2763	2.22104	2.30511
arahy.287XCB	ZH16_S1_vs_ZH6_S1	--	RNA-binding protein 24-like isoform X2 [Glycine max]	10.9319	11.5683	4.61899	4.36376	3.85454	4.39137	2.30537	1.62393
arahy.US1BEE	ZH16_S1_vs_ZH6_S1	--	dual specificity protein phosphatase family protein	0.833226	2.05497	1.78038	1.14515	0.368737	1.38599	1.73019	0.6285
arahy.175RP4	ZH16_S1_vs_ZH6_S1	--	uncharacterized protein LOC100786564 isoform X2 [Glycine max]	11.3709	11.6779	4.58829	7.59277	4.02852	7.1827	8.60629	6.60712
arahy.GQ1BIK	;ZH16_S3_vs_ZH6_S3	--	glyoxal oxidase-related protein	62.6866	19.4525	54.5358	9.78452	166.475	44.6205	23.8062	9.79569
arahy.04BQTE	ZH16_S3_vs_ZH6_S3	--	disease resistance protein (TIR-NBS-LRR class)	0.543151	1.85494	1.1766	0.733652	0.455243	1.66887	0.506963	0.56629
arahy.P92TZX	ZH16_S1_vs_ZH6_S1	--	cactin-like isoform X1 [Glycine max]	2.52148	0.546313	1.41795	0.196236	0.294757	0.800118	2.7121	0.249344
arahy.APGH35	ZH16_S1_vs_ZH6_S1	--	zinc finger (C3HC4-type RING finger) family protein	2.84543	5.56889	3.48437	2.79284	1.28953	3.34708	2.18813	2.20849
arahy.ID0B6N	;ZH16_S2_vs_ZH6_S2	--	Peroxidase superfamily protein	0.876385	0.976378	0.185164	0.0321942	5.26072	0.12694	0.223794	0.0370413
arahy.1YXT4F	ZH16_S2_vs_ZH6_S2	--	threonine dehydratase biosynthetic protein	0.364563	16.0195	1.49615	0.328368	0.798572	0.703117	1.9939	0.261039
arahy.NX7S1R	;ZH16_S3_vs_ZH6_S3	HD-ZIP	Homeobox-leucine zipper protein family	1.61913	0.250521	11.1793	8.07285	8.72231	0.776842	4.09745	5.90279
arahy.UJVA95	ZH16_S1_vs_ZH6_S1	--	HEAT repeat-containing protein	3.68618	1.49353	1.21329	0.914528	0.73321	1.14203	1.18366	0.643591
arahy.BKX7X4	;ZH16_S4_vs_ZH6_S4	--	unknown protein	6.00124	12.1458	7.37575	1.32731	11.2441	30.1719	4.57118	0.147353
arahy.AUKV6I	ZH16_S2_vs_ZH6_S2	--	uncharacterized protein LOC102661778 [Glycine max]	0.133927	1.34807	0.181582	0.226596	0	0	0	0
arahy.0F76FX	ZH16_S2_vs_ZH6_S2	--	uncharacterized protein LOC100804417 isoform X6 [Glycine max]	5.95343	1.02735	0.124381	0.363871	0.696027	0	0	0
Novel00993	ZH16_S3_vs_ZH6_S3	--	LRR receptor-like kinase [Medicago truncatula]	0.640758	2.29111	1.63182	0.763693	0.164671	0.402932	0.103907	0.0709442
arahy.0PHB1J	;ZH16_S3_vs_ZH6_S3	--	xyloglucan endotransglucosylase/hydrolase 32	1.14378	40.3676	133.346	47.7723	2.73908	70.3106	57.7173	22.2418
arahy.Z8ERH5	ZH16_S3_vs_ZH6_S3	--	purine permease 5	8.83444	14.3285	11.0597	6.13182	9.70191	15.4484	5.67396	3.66664
arahy.492D91	ZH16_S1_vs_ZH6_S1	--	PAR1 protein	14.3631	0.542929	0.463772	1.2831	4.05053	0.646993	0.230202	1.90943
arahy.4Z4H5J	ZH16_S1_vs_ZH6_S1	--	CAAX amino terminal protease family protein	12.1406	2.68208	2.27195	1.56764	4.90929	2.72732	1.88932	1.50138
arahy.M74JA5	ZH16_S4_vs_ZH6_S4	--	proline-rich protein 4	1429.65	133.256	51.1385	7.59317	1412.28	178.308	37.1792	1.48857
arahy.L5L68D	ZH16_S2_vs_ZH6_S2	--	phenylalanyl-tRNA synthetase, putative / phenylalanine--tRNA ligase, putative	3.34795	53.7953	7.33796	22.7392	3.45983	22.3469	16.5648	16.5331
arahy.CB1V86	ZH16_S4_vs_ZH6_S4	--	probable ADP-ribosylation factor GTPase-activating protein AGD11-like [Glycine max]	0.787639	3.22108	0.973943	1.35006	0.966431	1.47046	0.812462	0.278395
Novel00330	ZH16_S1_vs_ZH6_S1	--	--	1.51568	0.962353	0.751011	0.572328	0.0650043	0.13177	0.0880209	0
Novel00249	ZH16_S2_vs_ZH6_S2	--	PREDICTED: zinc finger BED domain-containing protein RICESLEEPER 2-like [Cicer arietinum]>gi|828339302|ref|XP_012567710.1| PREDICTED: zinc finger BED domain-containing protein RICESLEEPER 2-like [Cicer arietinum]>gi|828339304|ref|XP_012567712.1| PREDICTED: zinc finger BED domain-containing protein RICESLEEPER 2-like [Cicer arietinum]>gi|828339306|ref|XP_012567713.1| PREDICTED: zinc finger BED dom…	0.0360335	1.30464	0.076064	0.284176	0.00829604	0	0	0
arahy.JGP6YV	ZH16_S2_vs_ZH6_S2	--	protein arginine methyltransferase 6	0.594445	10.0026	1.80276	1.35239	0.586	2.76233	2.15233	1.26947
arahy.P8QM2T	ZH16_S3_vs_ZH6_S3	--	nodulin MtN21 /EamA-like transporter family protein	0.332699	63.1649	247.839	218.373	0.995113	83.4088	125.752	189.744
Novel01840	ZH16_S1_vs_ZH6_S1	--	hypothetical protein PHAVU_010G082200g [Phaseolus vulgaris]>gi|561007905|gb|ESW06854.1| hypothetical protein PHAVU_010G082200g [Phaseolus vulgaris]	1.07756	2.72606	1.50585	1.19039	0.334503	1.00206	0.908043	0.994951
arahy.TDV38N	ZH16_S1_vs_ZH6_S1	--	ubiquitin-conjugating enzyme 28	8.22191	21.2589	19.4686	15.6406	2.92717	18.0255	19.5864	17.4134
arahy.EE0YL2	ZH16_S2_vs_ZH6_S2	--	DNA binding	0.0208294	1.7176	0.235631	0.315883	0.039739	0.097221	0.0425961	0.0244907
Novel02819	ZH16_S4_vs_ZH6_S4	--	--	6.44432	8.1257	6.1147	7.07344	5.12985	5.69627	3.55392	2.35366
arahy.VBH056	ZH16_S1_vs_ZH6_S1	--	Unknown protein	9.46601	1758.84	852.563	320.694	3.88253	1634.21	934.803	547.692
arahy.YCEX9W	ZH16_S1_vs_ZH6_S1	--	AWPM-19-like family protein	1.68708	5.82658	126.934	93.0494	0.784553	14.5158	114.832	92.6427
arahy.LMT1MP	ZH16_S2_vs_ZH6_S2	--	Calcium-binding endonuclease/exonuclease/phosphatase family	5.57484	1.81874	0.212048	0.129754	6.22483	0.408381	0.259632	0.0429717
arahy.DE5YG6	;ZH16_S3_vs_ZH6_S3	--	BEL1-like homeodomain protein 1-like isoform X4 [Glycine max]	28.2599	4.09098	9.026	4.28466	56.0886	8.7237	3.95556	2.78394
arahy.96HN1Z	ZH16_S1_vs_ZH6_S1	--	late embryogenesis abundant protein group 3 protein	121.56	9.61329	2305.49	2980.55	46.6175	5.1904	3520.43	3160.65
arahy.S0XBJZ	ZH16_S2_vs_ZH6_S2	--	beta vacuolar processing enzyme	9.82529	42.052	10.3534	9.28906	4.74759	11.8562	7.78023	5.64287
arahy.U4X66R	ZH16_S2_vs_ZH6_S2	--	protein kinase family protein	0.670391	0.896278	0.663558	0.322299	0.0518265	0	0	0
Novel02350	ZH16_S4_vs_ZH6_S4	--	--	0.819773	3.54004	3.32714	3.36303	0.687083	0.211264	0.139554	0
arahy.0VG9YA	ZH16_S4_vs_ZH6_S4	--	uncharacterized protein LOC100783150 isoform X2 [Glycine max]	2.79849	48.214	11.2093	2.30597	2.77463	28.9219	7.38263	0.722261
arahy.LT4L2L	;ZH16_S3_vs_ZH6_S3	--	protein CHUP1, chloroplastic-like isoform X2 [Glycine max]	12.5659	0.118098	2.49219	1.81933	15.883	1.21613	0.99265	0.924751
arahy.X38HVK	ZH16_S4_vs_ZH6_S4	--	Major facilitator superfamily protein	0.573241	0.145034	0.295663	2.92852	1.13266	0.31756	2.12709	0
arahy.2CLZ47	ZH16_S2_vs_ZH6_S2	--	CM0216.310.nc protein n=1 Tax=Lotus japonicus RepID=B0BLH9_LOTJA	0.836535	9.92682	4.07177	5.76506	0.328931	2.75728	1.62808	2.5841
arahy.8VXK9L	ZH16_S4_vs_ZH6_S4	--	specific tissue protein	0	0.677347	17.0161	70.7103	0.180649	0.334622	11.2517	20.2576
arahy.54XXT5	ZH16_S1_vs_ZH6_S1	--	ER membrane protein complex subunit 4-like [Glycine max]	2.72769	0.263751	0.145892	0	0.146555	0.444321	0.58258	0
arahy.2P5CMY	ZH16_S2_vs_ZH6_S2	--	F-box and associated interaction domains-containing protein	2.39489	3.13177	0.932271	0.633329	1.54452	0.959515	0.358473	0.165495
arahy.548L12	ZH16_S3_vs_ZH6_S3	--	uncharacterized protein LOC102659480 [Glycine max]	0.521837	2.51208	8.17113	0.704738	0.856966	1.11511	0.882552	0.267799
arahy.2RNN62	ZH16_S2_vs_ZH6_S2	--	actin depolymerizing factor 1	6.33006	34.9792	11.8722	15.3778	4.2529	14.909	10.732	7.61691
arahy.P6QIT2	ZH16_S1_vs_ZH6_S1	--	Disease resistance protein (TIR-NBS-LRR class) family	1.02385	0.0611756	0.0456102	0.0494121	0.0334338	0.064681	0.0569238	0.0462192
arahy.DV6GD6	ZH16_S3_vs_ZH6_S3	--	serine carboxypeptidase-like 51	108.025	75.904	28.1193	5.25647	123.433	52.067	14.1972	3.25137
arahy.V4QB5P	ZH16_S1_vs_ZH6_S1	--	ATP-binding ABC transporter	4.56722	0.405639	0.304595	0.0575109	1.87968	0.0856924	0.242074	0.151875
arahy.KIE2XR	ZH16_S2_vs_ZH6_S2	--	cytokinin oxidase/dehydrogenase 1	0.552371	4.0652	0.934695	1.98097	0.0916981	0.125272	0.595945	0.0824813
Novel02770	ZH16_S2_vs_ZH6_S2	--	PREDICTED: Dof17 isoform X1 [Glycine max]>gi|571464122|ref|XP_006582961.1| PREDICTED: Dof17 isoform X2 [Glycine max]>gi|734329640|gb|KHN06326.1| Dof zinc finger protein DOF3.7 [Glycine soja]	2.21295	11.2216	4.57855	8.33302	0.967694	3.86696	2.86398	4.67423
arahy.165IIH	ZH16_S1_vs_ZH6_S1	--	Protein kinase superfamily protein	9.35512	7.67197	2.24532	0.828242	4.50335	4.8783	2.17587	0.291163
Novel02337	ZH16_S2_vs_ZH6_S2	--	hypothetical protein VITISV_003778 [Vitis vinifera]	0.128838	2.32365	1.02848	2.38228	0.0271431	0.313889	0.459409	1.03534
arahy.TE7I1T	ZH16_S1_vs_ZH6_S1	--	LRR and NB-ARC domain disease resistance protein	0.618506	1.37658	0.48393	0.310778	0.0567783	0.215167	0.0192206	0.0699838
arahy.HA5D83	ZH16_S4_vs_ZH6_S4	TF	MADS-box transcription factor family protein	12.1037	22.6498	19.676	35.4134	9.60985	38.1425	19.3506	16.0019
arahy.5R195S	ZH16_S1_vs_ZH6_S1	TF	MADS-box transcription factor 6 [Glycine max]	9.04953	3.63971	1.30043	1.70865	4.43918	1.74685	0.814512	0.163182
arahy.W8QXVR	ZH16_S1_vs_ZH6_S1	--	subtilisin-like serine protease 2	0.999361	1.65543	253.057	186.249	0.483358	9.80729	186.025	107.56
arahy.WS6393	ZH16_S1_vs_ZH6_S1	--	sucrose synthase 6	11.4556	0.560429	0.159993	0.0274895	5.68233	0.702193	0.275524	0.0874708
arahy.27B95C	ZH16_S1_vs_ZH6_S1	SET	histone-lysine N-methyltransferase ATX5-like [Glycine max]	0.947486	3.50389	0.227943	0.083116	0.13473	2.40729	0.33354	0.0350332
arahy.477F6P	ZH16_S2_vs_ZH6_S2	--	beta-fructofuranosidase	51.4344	6.79456	0.458291	0.13022	26.0608	2.50684	0.839612	0.25379
arahy.R9EUUB	ZH16_S2_vs_ZH6_S2	--	Pentatricopeptide repeat (PPR) superfamily protein	0.919315	1.9784	0.881672	0.856892	0.278579	0.461529	0.208733	0.256476
arahy.WE5WNX	;ZH16_S3_vs_ZH6_S3	--	receptor-like serine/threonine kinase 2	0.0171271	0.294419	6.15622	6.11912	0.241978	0.910993	3.15366	3.31374
arahy.P4S7LA	ZH16_S1_vs_ZH6_S1	--	MACPF domain protein	7.42701	3.44612	2.70167	3.64694	3.29354	2.42805	2.13829	2.11062
arahy.JDV80H	ZH16_S3_vs_ZH6_S3	--	malate dehydrogenase	16.7698	13.7773	24.6093	14.6381	12.5366	13.6207	10.8206	10.2186
arahy.7SJ9JV	ZH16_S1_vs_ZH6_S1	--	citrate synthase 3	3.10479	1.06395	15.5053	13.0587	1.22559	2.37202	13.8002	11.6499
arahy.8B7VWK	ZH16_S2_vs_ZH6_S2	--	sugar porter (SP) family MFS transporter	18.7015	9.01077	0.683831	0.381121	12.7629	3.97985	0.829782	0.156886
arahy.42V4U6	ZH16_S1_vs_ZH6_S1	--	Chaperone DnaJ-domain superfamily protein	15.506	1.79938	2.42089	8.73884	6.52766	2.39903	3.25145	7.66604
arahy.NEQX61	ZH16_S2_vs_ZH6_S2	--	oligopeptide transporter 5	0.0965893	8.44744	1.68237	0.685198	0.134308	4.00883	1.05255	1.33115
arahy.KXJ4AK	ZH16_S2_vs_ZH6_S2	--	BURP domain-containing protein	0.350542	0.797296	42.8781	31.2375	0.368779	0.167411	51.705	23.5089
arahy.YR6PCG	ZH16_S2_vs_ZH6_S2	--	uncharacterized protein LOC100816026 isoform X1 [Glycine max]	0	8.8736	2.05638	0.455585	0.542454	0.0993116	0.0306052	0
arahy.J2PRY0	ZH16_S2_vs_ZH6_S2	--	DNA mismatch repair protein MutS	0.82482	15.1066	2.07734	2.09735	1.42082	6.43226	1.99191	1.5462
arahy.MH7BQR	ZH16_S4_vs_ZH6_S4	--	cysteine synthase C1	6.16039	55.45	30.4831	14.2235	9.76737	47.9088	15.7071	6.1532
arahy.LCIL6D	ZH16_S3_vs_ZH6_S3	--	probable 2-oxoglutarate/Fe(II)-dependent dioxygenase-like [Glycine max]	0.273745	0.0726887	4.39141	5.6058	0.894983	0.0947228	1.56034	2.69622
Novel02426	ZH16_S2_vs_ZH6_S2	--	PREDICTED: uncharacterized protein LOC104885245, partial [Beta vulgaris subsp. vulgaris]	0.0213826	1.74511	0.10604	0.0845261	0	0.0219741	0.0143227	0
arahy.7W4W3Z	ZH16_S1_vs_ZH6_S1	--	S-ribonuclease n=5 Tax=Prunus RepID=A8R5J7_PRUMU	50.6017	20.401	14.6155	17.7533	6.17075	19.3732	16.1458	20.0552
arahy.WYW97W	;ZH16_S4_vs_ZH6_S4	--	Chalcone-flavanone isomerase family protein	1.5188	66.0866	26.7876	6.45437	5.48827	73.6926	15.4635	2.89822
arahy.UI0JR9	ZH16_S4_vs_ZH6_S4	--	potato type II proteinase inhibitor family protein	0.0483878	3.47973	65.791	50.4003	0.0683242	6.07017	81.2959	18.7106
arahy.1L2IGB	ZH16_S2_vs_ZH6_S2	--	Pentatricopeptide repeat (PPR) superfamily protein	0.136034	1.43006	0.520053	0.630025	0.0429886	0.127906	0.109947	0.305515
arahy.T4QIAH	ZH16_S4_vs_ZH6_S4	--	beta-xylosidase 1	265.775	4.00523	3.80537	7.83092	351.911	5.69114	2.88481	2.48622
arahy.N9VR5S	ZH16_S1_vs_ZH6_S1	--	GDSL-like Lipase/Acylhydrolase superfamily protein	69.6347	0	0	0	27.6322	0.0181902	0	0
arahy.305V45	ZH16_S1_vs_ZH6_S1	--	peptidyl-prolyl cis-trans isomerase CYP40-like isoform X3 [Glycine max]	6.67195	7.75527	5.46183	6.73949	1.20539	3.99387	3.37133	1.83671
arahy.7HC8IY	ZH16_S2_vs_ZH6_S2	--	sterol 3-beta-glucosyltransferase UGT80A2-like isoform X2 [Glycine max]	1.54348	28.0557	28.4359	34.3401	0.853456	11.8874	31.4264	29.7825
arahy.V367V9	ZH16_S2_vs_ZH6_S2	--	beta-galactosidase 8	6.75882	54.8871	12.7751	17.9897	3.2957	20.453	14.31	9.5273
arahy.S77KHM	ZH16_S1_vs_ZH6_S1	--	Tetratricopeptide repeat (TPR)-like superfamily protein	25.6435	8.71975	2.55728	1.26042	12.5776	12.8402	2.82742	0.386027
arahy.0S64XP	ZH16_S1_vs_ZH6_S1	--	Pentatricopeptide repeat (PPR) superfamily protein	4.83548	7.1989	2.07996	1.90977	2.39438	5.38258	1.57165	1.90028
arahy.ZDDL0F	ZH16_S1_vs_ZH6_S1	--	Transmembrane amino acid transporter family protein	7.82252	1.41974	5.63258	11.7277	0.736749	0.837718	4.8854	9.79945
arahy.JRGB4J	ZH16_S1_vs_ZH6_S1	TF	transcription factor EMB1444-like [Glycine max]	10.6163	40.053	6.14855	3.19509	5.06882	53.09	13.6242	5.47673
arahy.JZ9DV9	ZH16_S2_vs_ZH6_S2	--	Unknown protein	1.56519	5.87816	1.76905	1.44565	0.185512	0.550854	0.753594	0.152439
arahy.8P26IK	ZH16_S1_vs_ZH6_S1	--	uncharacterized protein LOC100800538 [Glycine max]	2.72108	7.29972	0.956499	1.085	0.770963	2.7808	2.338	1.1471
arahy.FX782E	ZH16_S2_vs_ZH6_S2	AUX/IAA	indole-3-acetic acid inducible 9	32.1769	704.691	25.7728	12.5462	22.2219	173.049	38.94	11.1855
arahy.XYE3G9	ZH16_S4_vs_ZH6_S4	--	CBL-interacting protein kinase 3	0	1.47427	1.22207	2.52281	0	0.699357	0.0391556	0
arahy.VWQQ3X	ZH16_S1_vs_ZH6_S1	--	Amino acid permease family protein	0.527545	0.838457	1.69597	3.81666	0.0342079	0.643545	2.59383	3.93217
arahy.IZA4PH	ZH16_S1_vs_ZH6_S1	--	Secretory carrier membrane protein (SCAMP) family protein	22.228	1.854	0.668493	0.114934	0.759103	3.47808	0.683833	0.106594
arahy.XZS3QI	ZH16_S1_vs_ZH6_S1	--	ATP-dependent zinc metalloprotease FTSH protein	3.15474	7.72651	1.45989	2.48872	0.0986364	1.87149	0.868149	0.121577
arahy.0T6MFC	ZH16_S1_vs_ZH6_S1	--	aspartate aminotransferase 1	13.1698	1.6345	5.06501	3.4338	6.12316	2.21312	3.63212	2.84833
arahy.TYLU08	;ZH16_S4_vs_ZH6_S4	--	catalase 2	1749.22	90.9792	312.43	164.735	2123.04	360.121	169.924	59.9515
arahy.M5LIDL	ZH16_S1_vs_ZH6_S1	--	nodulin MtN21 /EamA-like transporter family protein	3.29243	14.3295	44.0226	34.3995	1.50196	11.0686	30.9647	29.3305
arahy.6Y8RG6	ZH16_S2_vs_ZH6_S2	--	metal-nicotianamine transporter YSL3-like isoform X4 [Glycine max]	0.109044	0.678914	0.186949	0.553442	0.0315525	0	0.0142415	0
arahy.KWHJ4Z	ZH16_S4_vs_ZH6_S4	--	alpha-galactosidase 1	10.313	162.191	17.0441	6.23668	9.2781	90.0584	18.3276	2.98978
arahy.L4A9IR	ZH16_S2_vs_ZH6_S2	--	Unknown protein	0.106446	642.609	1.75752	0	0.0906718	8.63189	1.06951	0.236819
Novel00573	ZH16_S2_vs_ZH6_S2	--	--	0.243376	2.50306	0.388778	0.287962	0.0606729	0.0179675	0.0190413	0.0346655
arahy.4VW05J	ZH16_S1_vs_ZH6_S1	--	NAD(P)-binding Rossmann-fold superfamily protein	8.48883	0.139403	0.0666297	0.0292924	2.8186	0.0521596	0	0
Novel02042	ZH16_S1_vs_ZH6_S1	--	--	14.0926	0.8438	0.595402	0.510909	5.10016	1.06756	0.8059	0.15737
arahy.8G7WAE	ZH16_S3_vs_ZH6_S3	--	protein LONGIFOLIA 2-like isoform X6 [Glycine max]	38.9678	1.97494	1.04781	0.655591	19.9346	1.25588	0.440506	0.202032
arahy.00B185	;ZH16_S2_vs_ZH6_S2	--	beta galactosidase 1	114.525	5.93419	14.2582	13.4576	309.024	2.5385	8.19421	9.86196
arahy.I4JYF5	ZH16_S3_vs_ZH6_S3	--	phloem protein 2-A9	500.962	3.53449	8.45945	4.43248	403.584	6.06919	2.54625	2.74654
arahy.FUQ01W	ZH16_S2_vs_ZH6_S2	--	histone H2A 11	6.21258	141.048	21.805	23.0549	9.59508	60.2707	22.4855	15.7565
arahy.R6C5BS	ZH16_S4_vs_ZH6_S4	--	lysosomal beta glucosidase-like isoform X4 [Glycine max]	19.4867	4.99237	4.17608	3.192	15.7378	3.66963	4.25962	1.40438
arahy.U5ZP0C	ZH16_S1_vs_ZH6_S1	--	E3 ubiquitin-protein ligase RNF14 n=2 Tax=Triticeae RepID=R7W4K2_AEGTA	3.70557	0.119605	0.130577	0.626731	0.0698526	0.391693	0.197284	0.113009
Novel03414	ZH16_S2_vs_ZH6_S2	--	--	0.845095	3.80667	1.08256	2.96923	0.863191	1.68573	2.20665	1.65036
arahy.D7NBKG	ZH16_S2_vs_ZH6_S2	--	uncharacterized protein LOC100797300 isoform X1 [Glycine max]	23.2098	1.11631	0.141354	0.140517	14.6313	0.230927	0.141801	0.0309803
arahy.7B8RN4	ZH16_S3_vs_ZH6_S3	--	transmembrane protein, putative	5.47115	1.90884	2.41564	1.33567	3.71898	2.81301	1.17194	1.27927
arahy.HBWS59	ZH16_S1_vs_ZH6_S1	--	nodulin MtN21 /EamA-like transporter family protein	30.1983	10.1217	0.110753	0	9.71054	3.64232	0.507046	0
Novel00321	ZH16_S4_vs_ZH6_S4	--	DUF247 domain protein [Medicago truncatula]	6.57684	6.16438	3.94643	5.65457	6.79469	6.12295	2.92457	2.17935
arahy.P8H3WY	ZH16_S2_vs_ZH6_S2	--	phosphate transporter 1	36.3264	20.0657	1.39468	0.671171	23.542	5.86431	0.926245	0.78294
arahy.RHCW3A	ZH16_S2_vs_ZH6_S2	--	receptor like protein 7	0.0175494	1.66749	0.26186	0.0923136	0.0260438	0	0.0117551	0
arahy.7J2BAB	ZH16_S2_vs_ZH6_S2	--	Protein phosphatase 2C family protein	0	0.664779	0.348263	0.255045	0	0	0	0
arahy.VZ45Z4	ZH16_S2_vs_ZH6_S2	--	30S ribosomal protein S13	3.60703	10.4985	3.56527	6.33164	1.11187	2.14114	2.69716	2.07367
arahy.8CP0UI	ZH16_S3_vs_ZH6_S3	--	aldehyde dehydrogenase family 2 member C4-like [Glycine max]	4.10154	15.2161	25.6999	13.189	3.42664	14.7476	12.0079	7.02762
Novel02430	ZH16_S2_vs_ZH6_S2	--	hypothetical protein MTR_5g093210 [Medicago truncatula]	4.20727	38.4578	13.8178	22.6969	2.14097	8.988	7.66106	9.13942
arahy.Q6L2WS	ZH16_S1_vs_ZH6_S1	--	receptor-like protein kinase 2	5.57768	0.295002	0.0425937	0.0434286	1.04329	0.718533	0.211562	0.0577758
arahy.083TJ3	ZH16_S1_vs_ZH6_S1	--	vacuolar cation/proton exchanger 3	113.934	131.866	13.0878	5.26893	49.1718	150.062	26.082	6.82884
Novel02996	ZH16_S2_vs_ZH6_S2	--	hypothetical protein PHAVU_004G177000g [Phaseolus vulgaris]>gi|593705248|ref|XP_007152988.1| hypothetical protein PHAVU_004G177000g [Phaseolus vulgaris]>gi|561026296|gb|ESW24981.1| hypothetical protein PHAVU_004G177000g [Phaseolus vulgaris]>gi|561026297|gb|ESW24982.1| hypothetical protein PHAVU_004G177000g [Phaseolus vulgaris]	0.217802	3.16432	0.538331	0.619837	0.0756599	0.385329	0.0512247	0.139885
arahy.Y2FUU3	ZH16_S1_vs_ZH6_S1	--	60S ribosomal protein L24-2	21.2143	4.30393	131.341	1.41691	1.52819	6.11028	169.888	1.18885
arahy.IBMY13	ZH16_S2_vs_ZH6_S2	--	ATP-binding ABC transporter	6.36518	1.25797	0.166736	0.0476083	4.7129	0.376329	0.100868	0.0792505
arahy.X5MG7Q	ZH16_S3_vs_ZH6_S3	--	Phosphate-responsive 1 family protein	19.1517	1.31946	9.66907	0.0970425	51.9888	3.0691	1.24091	0.117767
arahy.Q9CK1R	ZH16_S2_vs_ZH6_S2	--	nicotinate phosphoribosyltransferase 1	1.83132	3.68835	0.404761	0.506798	1.27246	0.979956	0.275486	0.177047
arahy.ZC14HK	;ZH16_S2_vs_ZH6_S2	--	serine/threonine-protein kinase TIO-like [Glycine max]	11.4166	0.686891	0.456709	0.0906033	24.7707	0.126956	0.337751	0.257933
arahy.93VR75	ZH16_S2_vs_ZH6_S2	--	trehalose phosphate synthase	1.47517	1.0442	0.284367	0.342654	0.708012	0.123291	0.251669	0.236843
arahy.2IS61F	ZH16_S1_vs_ZH6_S1	--	BTB/POZ domain-containing protein [Glycine max]	0.688375	0.952967	0.782933	0.202761	0.139224	1.29201	0.396758	0.275124
arahy.70E6DW	ZH16_S2_vs_ZH6_S2	TF	MADS-box transcription factor 6 [Glycine max]	1.5296	2.59308	0.40864	0.164995	0.525766	0.256333	0.0900434	0
arahy.908HV2	ZH16_S2_vs_ZH6_S2	C2H2	zinc-finger protein 1	3.34019	11.583	1.88953	0.676707	3.3997	5.17808	1.61012	0.691081
Novel04299	ZH16_S2_vs_ZH6_S2	--	unknown [Arachis hypogaea]	0.15778	1.6509	0.0202694	0.112828	0.0869543	0.0209052	0	0
arahy.X50QN8	ZH16_S1_vs_ZH6_S1	--	Pentatricopeptide repeat (PPR) superfamily protein	0.311105	1.16075	0.571831	0.533729	0	0.825933	0.345546	0.36481
arahy.R5PYRW	;ZH16_S4_vs_ZH6_S4	--	Unknown protein	5.23525	1.53479	12.0189	9.73104	14.5728	7.6041	5.71719	0.200173
Novel00766	ZH16_S1_vs_ZH6_S1	--	--	1.6104	3.10408	1.91988	0.515094	0.31008	1.52977	0.370671	0.71466
arahy.JX0W3T	ZH16_S2_vs_ZH6_S2	--	DNA mismatch repair protein msh6	0.092634	5.03487	1.25381	1.42597	0.193679	1.26087	0.423459	0.474915
arahy.JXP29T	ZH16_S3_vs_ZH6_S3	--	Transmembrane amino acid transporter family protein	0.633064	0.146528	5.38449	0.0650661	0.705115	0.198623	0.221447	0.139557
arahy.03GS4R	ZH16_S1_vs_ZH6_S1	--	Eukaryotic aspartyl protease family protein	1.57688	1.15561	0.401155	0.790213	0.0369739	2.03065	0.770271	0.215158
arahy.47Q1NW	ZH16_S1_vs_ZH6_S1	TF	transcription factor CYCLOIDEA-like isoform X3 [Glycine max]	1.67675	0.0136404	0.011648	0	0	0	0.033947	0.0231779
arahy.5J98P8	;ZH16_S3_vs_ZH6_S3	--	transmembrane protein, putative	21.6626	1.52059	8.29087	2.23028	51.5847	2.05296	2.70718	0.541405
arahy.WU9C10	ZH16_S1_vs_ZH6_S1	--	NADH dehydrogenase [ubiquinone] 1 alpha subcomplex subunit 2 n=3 Tax=Camelineae RepID=NDUA2_ARATH	14.5423	6.45442	1.74514	2.70281	1.09165	1.74817	0.109952	0
arahy.P9FNJN	ZH16_S1_vs_ZH6_S1	--	putative nuclease HARBI1-like [Glycine max]	1.26127	2.24452	0.648291	0.305775	0.173858	0.621744	0.100025	0.140279
arahy.T2VPZC	ZH16_S2_vs_ZH6_S2	--	Cellulase (glycosyl hydrolase family 5) protein	0.432269	467.653	1.2685	0.0937647	0.673351	133.712	17.3917	0.367576
Novel02822	ZH16_S1_vs_ZH6_S1	--	--	1.37425	0.947446	1.80228	1.07806	0	2.12496	0.0623797	0.217159
Novel02775	ZH16_S2_vs_ZH6_S2	--	--	0.171683	2.26529	1.15212	0	0	0	0.0374064	0.396642
arahy.6GA0DJ	ZH16_S2_vs_ZH6_S2	--	alpha-L-fucosidase 1	34.6331	12.7153	0.873926	0.338969	32.9759	4.86114	0.73602	0
arahy.8BV56R	ZH16_S1_vs_ZH6_S1	--	subtilisin-like serine protease 2	7.52941	24.8347	2.9152	1.11514	3.53074	22.738	4.55857	1.91343
arahy.J4PW6C	ZH16_S1_vs_ZH6_S1	--	LETM1-like protein	23.5704	15.3502	6.93474	5.29266	7.87925	7.49519	7.14324	4.62098
arahy.Q2MNTG	ZH16_S4_vs_ZH6_S4	--	beta-galactosidase 15	0.0494723	124.368	14.0071	1.46634	0.0513202	101.852	15.275	0.357943
arahy.SR33X7	ZH16_S4_vs_ZH6_S4	--	ATP synthase D chain, mitochondrial	18.4173	2.43261	1.46344	17.9246	7.31679	3.10266	2.04197	0.834057
arahy.8DLF81	ZH16_S3_vs_ZH6_S3	--	Protein kinase superfamily protein	0.161311	1.49843	1.29661	2.28268	0.0804154	0.863541	0.508988	1.2953
arahy.J522ZU	ZH16_S1_vs_ZH6_S1	--	LL-diaminopimelate aminotransferase	1.50743	0.0580792	0.259373	0.466175	0.590321	0.0493787	0.118258	0.933585
arahy.ESA3XA	ZH16_S1_vs_ZH6_S1	--	transmembrane protein, putative	3.34875	1.87483	2.04038	1.2104	0.349948	1.43156	0.436916	0.518772
arahy.ARH0VQ	ZH16_S2_vs_ZH6_S2	--	Spo11/DNA topoisomerase VI, subunit A protein	1.935	6.86329	0.785652	1.25502	1.00593	2.91825	0.945347	0.688922
arahy.5IM6J0	ZH16_S1_vs_ZH6_S1	--	Non-specific lipid-transfer protein, putative	120.596	0.0427198	0	0	35.5637	0	0	0.132433
arahy.JLT3U8	ZH16_S1_vs_ZH6_S1	--	Unknown protein	0.867441	1.57297	0.533915	0.657422	0.034551	0.715627	0.265102	0.120282
arahy.6P9HVR	ZH16_S2_vs_ZH6_S2	--	Unknown protein	0.0969229	6.11635	0.543982	1.43992	0	0.0996041	0	0
arahy.XE4EDZ	ZH16_S1_vs_ZH6_S1	--	RAB GDP dissociation inhibitor 2	1.14661	0.349745	0.015943	0	0.0922179	0.55046	0.0464643	0
Novel03268	ZH16_S2_vs_ZH6_S2	--	--	0.0476874	6.06571	1.74672	1.74781	0.610915	0.127823	0.144427	0
arahy.21R0E2	ZH16_S1_vs_ZH6_S1	--	Protein kinase superfamily protein	34.2836	9.67117	26.4439	20.7979	13.6586	15.9395	21.2948	19.5104
arahy.ANJF9J	ZH16_S4_vs_ZH6_S4	--	metacaspase 9	11.7848	0.651733	0.365535	0.486407	17.0596	1.499	0.239929	0
arahy.3B2KV5	ZH16_S2_vs_ZH6_S2	--	protein DYAD isoform X3 [Glycine max]	4.48634	11.8607	5.15121	6.00661	2.26288	5.09865	4.24135	4.46723
arahy.Q8JEHC	ZH16_S2_vs_ZH6_S2	--	terpene synthase 03	0.454621	3.06093	0.0193129	0.0956894	0.522507	0.622665	0.140722	0.03843
arahy.UX9V95	ZH16_S1_vs_ZH6_S1	--	uncharacterized protein LOC100780312 [Glycine max]	2.32411	2.0122	1.11798	1.52067	1.13858	1.67564	0.648003	1.07445
arahy.A4VS3L	ZH16_S3_vs_ZH6_S3	--	probable nucleoredoxin 1-like isoform X1 [Glycine max]	15.2181	1.71884	2.32054	1.55884	15.6864	2.01044	0.897939	0.66156
arahy.35SLR1	ZH16_S4_vs_ZH6_S4	--	Calmodulin-binding protein	31.4068	29.4953	6.56613	0.939023	24.6812	22.8743	3.40914	0.281726
arahy.22G7N5	ZH16_S3_vs_ZH6_S3	TF	trihelix transcription factor GT-2-like [Glycine max]	65.7739	0.223948	0.621722	0.06995	75.2041	0.0332645	0.0787047	0.0214936
arahy.67VYHR	ZH16_S1_vs_ZH6_S1	--	uncharacterized protein LOC100807586 isoform X2 [Glycine max]	27.7574	0.0230636	0.25177	0.0934805	10.7268	0.0882782	0.0430531	0.15676
Novel01549	ZH16_S4_vs_ZH6_S4	--	--	0.134843	4.1427	2.38443	5.25614	0.0901555	1.34053	0.610366	0
arahy.9N64NI	ZH16_S1_vs_ZH6_S1	--	protein TPX2-like isoform X1 [Glycine max]	6.11667	9.95177	2.35864	1.12292	2.81003	8.13635	2.55359	1.17649
arahy.UPL4LC	ZH16_S1_vs_ZH6_S1	--	Defensin MtDef4.6	23.356	1.6972	3.47377	1.31811	6.09365	2.65704	2.10202	0.679895
arahy.MGXB0Y	ZH16_S2_vs_ZH6_S2	TF	general transcription factor IIE subunit 1-like isoform X1 [Glycine max]	2.03284	12.3691	6.94374	5.8244	1.32656	2.89853	2.33145	1.61871
Novel00048	ZH16_S2_vs_ZH6_S2	--	uroporphyrinogen III synthase [Medicago truncatula]	6.18971	16.9525	6.10216	6.40156	5.63724	7.7328	7.10624	4.33285
arahy.6LU9QM	ZH16_S2_vs_ZH6_S2	--	Pentatricopeptide repeat (PPR) superfamily protein	0.227947	1.21858	0.723272	0.550706	0.0495207	0.0257191	0.0502912	0
arahy.4BMB9F	ZH16_S2_vs_ZH6_S2	--	probable sugar phosphate/phosphate translocator [Glycine max]	0.635221	2.30983	0.666543	0.678571	0.304841	0.887914	0.384809	0.232005
arahy.48HMV1	ZH16_S1_vs_ZH6_S1	--	pentatricopeptide repeat-containing protein At3g23020-like [Glycine max]	1.83664	12.9278	2.88063	2.75522	0.177639	7.41481	6.28892	3.33509
arahy.9NFN0F	ZH16_S1_vs_ZH6_S1	--	Protein kinase superfamily protein	22.0201	4.468	3.92579	2.55989	7.89663	3.10916	2.80968	2.18435
arahy.7TQ80F	ZH16_S3_vs_ZH6_S3	--	Unknown protein	0.469424	0.500326	7.30084	4.83749	0	0	0	0
arahy.3K77B1	ZH16_S3_vs_ZH6_S3	--	Protein of unknown function (DUF506)	8.47698	12.1537	10.2945	5.0861	12.6602	12.1856	4.12	2.74719
arahy.9E8HGZ	ZH16_S3_vs_ZH6_S3	--	Core-2/I-branching beta-1,6-N-acetylglucosaminyltransferase family protein	13.2264	3.21727	3.49025	2.73234	10.9728	4.26586	1.73247	1.75205
arahy.LV620I	ZH16_S4_vs_ZH6_S4	--	Protein kinase superfamily protein	6.69762	5.02351	4.49268	2.75367	8.75403	6.74299	2.84385	1.13028
Novel00922	ZH16_S2_vs_ZH6_S2	zf-HD	PREDICTED: mini zinc finger protein 3-like [Malus domestica]	0.0864401	65.8467	0	0	0.0427599	2.08959	0.289501	0
arahy.G586TU	ZH16_S3_vs_ZH6_S3	--	GDSL-like Lipase/Acylhydrolase superfamily protein	0.247954	1.36451	18.9964	19.6314	0.131142	0.646577	7.73041	13.1805
arahy.061K9L	ZH16_S1_vs_ZH6_S1	--	N-(5-phosphoribosyl)anthranilate isomerase	3.17023	5.74765	4.72818	4.78035	1.47741	5.955	5.15338	4.05357
arahy.0RI6JJ	ZH16_S4_vs_ZH6_S4	SRS	protein LATERAL ROOT PRIMORDIUM 1-like isoform X3 [Glycine max]	19.7928	4.11718	2.36717	1.6216	30.3996	6.89828	2.81583	0.58405
arahy.66AX9V	ZH16_S3_vs_ZH6_S3	--	Cytochrome P450 superfamily protein	0.882548	17.0431	28.3043	15.1919	1.07981	29.9482	13.9346	8.98147
arahy.BQ3B6K	ZH16_S2_vs_ZH6_S2	--	hexokinase 2	0.960532	6.51757	1.21558	1.03277	0.892604	2.19261	1.11123	1.0442
arahy.5QUI8A	ZH16_S3_vs_ZH6_S3	--	putative glycerol-3-phosphate transporter 1-like isoform X1 [Glycine max]	105.982	7.73904	14.0447	6.97953	72.112	9.81973	6.63421	4.26232
arahy.SJ46WD	ZH16_S3_vs_ZH6_S3	--	Unknown protein	2.92435	1.27559	21.7382	0.682049	2.94335	3.34819	0.085041	3.85393
arahy.CH9B83	ZH16_S2_vs_ZH6_S2	--	phosphatidylinositol 3,4,5-trisphosphate 3-phosphatase and dual-specificity protein phosphatase PTEN-like isoform X2 [Glycine max]	6.78261	35.2941	10.9502	12.4437	3.45154	14.9006	12.4354	13.8061
arahy.LH0ECB	ZH16_S2_vs_ZH6_S2	--	26S proteasome regulatory subunit n=8 Tax=Sordariomycetidae RepID=F8MZR3_NEUT8	0.763183	8.84078	0.680251	0.234509	0.581474	1.4315	1.08354	0.399327
arahy.5306M4	ZH16_S1_vs_ZH6_S1	--	pumilio-family RNA-binding repeatprotein	1.35754	1.76537	1.99807	1.02937	0.648513	1.64115	1.43237	1.25174
arahy.26781N	;ZH16_S4_vs_ZH6_S4	TF	transcription factor TT8-like [Glycine max]	0.019638	10.1505	3.46017	0.834227	0.245473	13.7718	2.64059	0.166588
arahy.LP056Y	;ZH16_S4_vs_ZH6_S4	--	mannan endo-1,4-beta-mannosidase 4-like [Glycine max]	1.31319	0	1.75329	2.3671	8.45504	0.0362734	0.582987	0.0988312
arahy.CAKS1J	ZH16_S3_vs_ZH6_S3	--	Protein of unknown function (DUF506)	11.7783	21.7168	18.6052	6.9668	22.8559	26.0692	7.00996	3.94406
arahy.KDI7TH	;ZH16_S4_vs_ZH6_S4	TF	AP2-like ethylene-responsive transcription factor ANT-like isoform X3 [Glycine max]	11.5552	0.650866	1.08657	1.48829	25.9381	1.19227	0.521118	0.372618
arahy.M6NE4G	ZH16_S3_vs_ZH6_S3	--	Glycerophosphodiester phosphodiesterase GDE1 n=2 Tax=Triticeae RepID=M8BLH1_AEGTA	232.564	8.50519	4.54563	1.35755	139.57	5.49374	2.0567	1.09621
arahy.T9WNSP	ZH16_S1_vs_ZH6_S1	--	alpha/beta fold hydrolase	3.61375	9.78934	2.4892	1.55377	1.73876	7.88083	3.45662	1.27025
arahy.S2CNDK	ZH16_S1_vs_ZH6_S1	--	Unknown protein	2.78325	5.44288	2.99953	5.18028	0.486653	2.2957	2.19181	4.55923
arahy.R92IIS	ZH16_S1_vs_ZH6_S1	--	vacuolar protein-sorting-associated protein 37 homolog 1-like [Glycine max]	10.0303	3.56505	0.0486447	0.14189	0.261202	2.72568	0	0.186364
arahy.S1RWR6	ZH16_S2_vs_ZH6_S2	--	Chaperone DnaJ-domain superfamily protein	2.02753	19.0445	5.97641	4.89493	2.58159	8.76711	6.11058	5.35377
arahy.FYPZ9V	ZH16_S2_vs_ZH6_S2	--	microtubule-associated protein 65-8	6.71624	3.65694	0.281565	0.427692	4.21333	1.3046	0.531159	0.223863
arahy.TA1JJE	ZH16_S1_vs_ZH6_S1	--	tRNA/rRNA methyltransferase (SpoU) family protein	1.64854	3.48515	0.704736	1.1454	0.721669	1.98307	0.937951	0.97597
arahy.WM4DMJ	ZH16_S4_vs_ZH6_S4	--	probable pectinesterase/pectinesterase inhibitor 34-like [Glycine max]	166.216	4.57452	9.18913	4.50475	190.815	3.74211	7.66331	1.8373
arahy.5231CT	ZH16_S1_vs_ZH6_S1	--	Glycosyl transferase, group 1 n=1 Tax=Roseiflexus sp. (strain RS-1) RepID=A5UXH0_ROSS1	1.90893	0.087675	0.386144	0.376626	0.421611	0.1008	0.103876	0.0810515
arahy.YAY0HW	ZH16_S1_vs_ZH6_S1	--	terpene synthase 04	1.87675	2.24869	37.8846	20.6988	0.817059	6.44113	69.7886	65.4359
arahy.7Y3SM7	ZH16_S1_vs_ZH6_S1	--	Gibberellin-regulated family protein	60.955	110.826	20.7982	16.0113	24.0375	61.9926	22.6777	14.5745
arahy.PW7YYH	ZH16_S2_vs_ZH6_S2	--	casein kinase alpha 1	1.31386	10.1294	2.83973	1.93948	1.12257	3.92135	2.78449	2.10025
arahy.ZINR5T	ZH16_S4_vs_ZH6_S4	--	alpha-amylase-like	0.312535	1.92846	14.9389	4.42076	0.104654	4.60006	6.77519	0.811889
arahy.R3KIKB	ZH16_S3_vs_ZH6_S3	--	1-aminocyclopropane-1-carboxylate synthase 11	106.656	5.99874	6.02485	1.49135	61.348	6.77086	2.72746	1.66788
arahy.58WDF9	ZH16_S4_vs_ZH6_S4	--	serine carboxypeptidase-like 48	7.08806	132.927	55.4345	19.6555	7.83221	149.227	39.0528	8.70293
arahy.FC6ISK	ZH16_S2_vs_ZH6_S2	--	zinc finger protein 8	0.334259	4.58813	2.9278	2.48652	0.222266	1.4696	1.92906	1.06975
arahy.GWDW3T	ZH16_S2_vs_ZH6_S2	--	DNAJ heat shock family protein	1.3575	4.84531	1.19586	2.13829	1.56826	2.26092	1.79304	1.07344
arahy.RA16HC	ZH16_S3_vs_ZH6_S3	--	protein MIZU-KUSSEI 1-like [Glycine max]	114.643	4.77696	3.98334	1.87768	144.07	4.05405	1.23516	0.897993
Novel03011	ZH16_S2_vs_ZH6_S2	--	--	0.361274	13.4343	1.29475	2.02997	0.352815	4.23167	1.27332	1.90734
arahy.VGWE53	ZH16_S2_vs_ZH6_S2	--	Water-selective transport intrinsic membrane protein 1 n=1 Tax=Lotus japonicus RepID=Q9LKJ6_LOTJA	743.966	43.5028	1.27765	0.0729827	815.602	18.2167	3.76658	0.321138
Novel00010	ZH16_S4_vs_ZH6_S4	--	PREDICTED: uncharacterized protein LOC105955856 [Erythranthe guttatus]	0.867591	2.88444	1.74558	1.2064	0.645679	4.8771	1.1812	0.240659
arahy.E0PJ22	ZH16_S3_vs_ZH6_S3	--	ATP binding/protein serine/threonine kinase [Glycine max]	0.721867	4.10694	3.59073	2.23048	1.36364	4.17319	1.80031	1.63814
arahy.7I4JN8	ZH16_S2_vs_ZH6_S2	--	transmembrane protein, putative	0.732287	15.4796	3.55839	6.10391	0.946548	3.48576	3.61126	2.74854
arahy.RH0ZME	ZH16_S1_vs_ZH6_S1	--	Non-specific lipid-transfer protein, putative	175.929	0	0.10812	0	63.7002	0	0.0393917	0.0717144
arahy.HC0VLG	ZH16_S1_vs_ZH6_S1	--	triose-phosphate transporter family protein	3.61011	5.00035	3.69404	2.21555	0.569683	2.04088	1.87125	1.73966
Novel03412	ZH16_S3_vs_ZH6_S3	PBF-2-like	PREDICTED: single-stranded DNA-binding protein WHY1, chloroplastic-like [Glycine max]	0.141421	0.712497	2.36637	0	0.0995525	0	0	0
Novel02653	ZH16_S3_vs_ZH6_S3	--	PREDICTED: UDP-glucuronate 4-epimerase 1-like [Glycine max]	76.8902	6.94927	14.8746	1.15149	71.3315	9.35186	4.541	0.925294
arahy.XG72H7	ZH16_S2_vs_ZH6_S2	--	Unknown protein	0.522971	9.94525	0.847682	3.30639	0	0	0	0
arahy.EY1098	ZH16_S2_vs_ZH6_S2	--	serine carboxypeptidase-like 40	0	17.3029	0.0263079	0	0	2.68749	0.392012	0
arahy.81C096	ZH16_S1_vs_ZH6_S1	--	Pentatricopeptide repeat (PPR) superfamily protein	1.337	1.20262	0.858165	0.581548	0.472239	1.34638	0.533368	0.956515
arahy.N816Q2	ZH16_S1_vs_ZH6_S1	--	GDSL-like Lipase/Acylhydrolase superfamily protein	8.01355	4.42927	0.607222	0.278711	3.65724	2.66268	0.560663	0.391109
arahy.54R7RK	ZH16_S3_vs_ZH6_S3	--	aquaporin NIP1-1-like [Glycine max]	0.032404	1.09385	11.7674	7.22551	0	0.915847	4.39851	3.10498
arahy.N8XZDR	ZH16_S1_vs_ZH6_S1	--	F-box/LRR protein	4.30229	4.58707	3.3252	1.14479	1.03521	2.12756	1.73805	1.46667
Novel00644	ZH16_S2_vs_ZH6_S2	--	hypothetical protein ARAX_ADH51I17-83F22-001 [Arachis duranensis]	0.839447	4.02855	1.20276	1.63761	0.773823	0.96384	0.42046	0.243954
arahy.CKCG07	ZH16_S2_vs_ZH6_S2	--	GDSL-like Lipase/Acylhydrolase superfamily protein	0.205436	12.0147	0.0822939	0.0764902	0.0261568	4.13464	0.767364	0.2466
arahy.K1CK5D	ZH16_S1_vs_ZH6_S1	--	GDSL-like Lipase/Acylhydrolase superfamily protein	5.41087	0.0891589	0.0338521	0	1.79796	0.030444	0.0652479	0
arahy.77E9KA	ZH16_S1_vs_ZH6_S1	--	Protein kinase superfamily protein	23.1707	1.33446	4.64439	1.90013	9.15553	1.415	2.25139	2.38886
arahy.8QDS1I	;ZH16_S2_vs_ZH6_S2	AUX/IAA	Auxin-responsive protein n=2 Tax=Populus RepID=B9GWR2_POPTR	16.9294	20.3867	0.51572	1.62269	47.422	5.37227	2.22688	1.85152
arahy.HMZA4Q	ZH16_S3_vs_ZH6_S3	--	1-aminocyclopropane-1-carboxylate synthase 11	33.6026	1.98713	2.4891	0.275182	22.3469	2.46759	0.880333	0.575994
Novel01654	ZH16_S3_vs_ZH6_S3	--	PREDICTED: protein EXORDIUM-like [Cicer arietinum]	14.4937	2.23637	33.3532	1.7463	38.699	3.53338	8.17883	1.29755
arahy.L5JI0V	ZH16_S1_vs_ZH6_S1	--	ammonium transporter 1	2.01978	3.98349	0.0336833	0.0508107	0.523851	1.38464	0.122715	0.0335126
arahy.RJG5DC	ZH16_S2_vs_ZH6_S2	--	Heavy metal transport/detoxification superfamily protein	0.402603	25.9013	27.3462	27.2328	1.03298	6.85929	37.6523	27.4631
arahy.A9DRMK	ZH16_S1_vs_ZH6_S1	--	Amino acid permease family protein	1.12681	1.27778	5.60032	6.01742	0.147594	0.795265	5.4656	6.31105
arahy.L5JYGR	ZH16_S4_vs_ZH6_S4	--	Sec14p-like phosphatidylinositol transfer family protein	1.28983	2.21112	2.52481	2.64845	1.03716	1.55567	1.43516	0.834599
arahy.1L8CHD	ZH16_S2_vs_ZH6_S2	--	Marine sediment metagenome DNA, contig: S01H1_C00432 n=1 Tax=marine sediment metagenome RepID=X0SQ33_9ZZZZ	3.4115	55.0193	7.73553	6.17166	3.70384	26.4682	9.27811	5.00517
arahy.MM5VKY	;ZH16_S3_vs_ZH6_S3	--	protein serine/threonine kinases	0.129019	2.40183	3.59323	2.24437	0.685631	3.14339	1.65156	1.44797
arahy.2DQF79	ZH16_S2_vs_ZH6_S2	TF	myb transcription factor	30.0897	18.751	1.18931	0.781895	48.6957	7.62041	1.69395	0.453642
arahy.R87Y2D	ZH16_S1_vs_ZH6_S1	--	protein ALUMINUM SENSITIVE 3-like [Glycine max]	7.79661	0.788108	2.98255	1.21899	3.72655	1.34689	1.38727	0.617332
arahy.I3116U	;ZH16_S3_vs_ZH6_S3	--	Peroxidase superfamily protein	3.21071	1.59807	1.67683	0.512844	9.92963	1.88107	0.566514	0.330056
arahy.DC1G4E	ZH16_S3_vs_ZH6_S3	--	dentin sialophosphoprotein-like isoform X2 [Glycine max]	0.382139	0.686147	1.08033	0.644159	0.372188	0.405647	0.262098	0.3835
arahy.6GN4C8	ZH16_S2_vs_ZH6_S2	--	Arabidopsis Inositol phosphorylceramide synthase 1	5.04247	0.693419	0.136357	0.148782	0.607681	0	0.0161343	0
arahy.4M6CWI	ZH16_S2_vs_ZH6_S2	--	LL-diaminopimelate aminotransferase	1.06754	10.6187	5.61674	7.44482	0.318751	1.69594	2.61319	3.53197
arahy.U4TMK5	ZH16_S1_vs_ZH6_S1	--	tobamovirus multiplication 2B	4.04005	12.351	13.0081	13.2723	1.73571	12.9163	7.85252	7.74168
Novel03203	ZH16_S3_vs_ZH6_S3	--	--	0.390748	3.13994	6.05907	3.10884	0.230479	1.90363	0.897822	1.42315
arahy.YSVF0U	ZH16_S3_vs_ZH6_S3	--	BAG family molecular chaperone regulator 6-like [Glycine max]	1.4441	67.9999	45.0474	8.28428	1.01406	36.359	15.2755	10.0412
arahy.3Y4VDA	ZH16_S3_vs_ZH6_S3	--	RING finger protein 38-like isoform X2 [Glycine max]	0.391527	1.55722	2.86496	0	0.0406003	0.488919	0	0
Novel02360	ZH16_S3_vs_ZH6_S3	--	PREDICTED: uncharacterized protein At3g28850-like [Glycine max]>gi|734430381|gb|KHN45490.1| Hypothetical protein glysoja_021565 [Glycine soja]	18.4219	1.55422	0.964033	0.228693	26.5913	0.795665	0.308153	0.0271467
arahy.TV98JP	ZH16_S1_vs_ZH6_S1	--	Pre-mRNA-splicing factor SLU7-like protein	1.94713	12.4045	6.22007	4.59862	0.836187	7.25403	9.41006	4.69284
arahy.Y2U02I	ZH16_S1_vs_ZH6_S1	G2-like	two-component response regulator-like APRR2-like isoform X2 [Glycine max]	61.0508	3.14351	2.09448	0.833579	14.7429	2.9921	2.37424	0.856236
arahy.GE7JSC	;ZH16_S4_vs_ZH6_S4	--	HXXXD-type acyl-transferase family protein	0.124701	4.50813	12.5705	7.78125	0.658917	7.29293	6.71162	3.09856
arahy.N787F7	ZH16_S1_vs_ZH6_S1	--	uncharacterized protein DDB_G0286299-like [Glycine max]	3.17967	3.6412	1.79925	2.34391	0.795071	4.77691	3.06571	1.59541
arahy.FYP59N	;ZH16_S4_vs_ZH6_S4	--	Cytochrome P450 superfamily protein	4.77927	10.1568	5.54695	4.15578	13.5342	10.1513	4.59104	1.9701
arahy.00E8H2	ZH16_S1_vs_ZH6_S1	--	putative nuclease HARBI1-like [Glycine max]	0.424839	1.23603	0.565136	0	0.0282949	0.564928	0.107911	0.102502
arahy.JPXG8L	ZH16_S1_vs_ZH6_S1	--	Unknown protein	21.9371	13.8035	25.5287	23.3037	7.59333	12.6508	15.7946	11.2231
Novel00877	ZH16_S3_vs_ZH6_S3	--	--	0.0965763	0.927652	2.71233	0	0.425274	0	0	0
arahy.08WRUD	ZH16_S2_vs_ZH6_S2	--	Rer1 family protein	0.13435	0.458979	0.338584	0.765525	0.135721	0.0122796	0.13339	0.0823109
arahy.PNID9I	ZH16_S2_vs_ZH6_S2	--	psbP domain-containing protein 2, chloroplastic-like [Glycine max]	0	9.62663	1.39337	1.52523	0.125607	0.116248	0.056694	0
arahy.HZCX8J	ZH16_S2_vs_ZH6_S2	--	Quinone reductase family protein	1.25417	14.4183	26.5978	18.6153	1.56915	5.40938	27.7806	18.223
arahy.05RG55	ZH16_S4_vs_ZH6_S4	--	laccase 7	0	53.6187	10.4616	0.955393	0.0466168	59.1587	10.1461	0
Novel02011	ZH16_S1_vs_ZH6_S1	--	F-box protein interaction domain protein [Medicago truncatula]	7.41678	0.129105	0.446074	7.35986	0.492706	8.59504	0.281154	11.2316
arahy.FHX76J	ZH16_S2_vs_ZH6_S2	--	Disease resistance protein (TIR-NBS-LRR class) family	0.570165	0.645822	0.281475	0.186836	0.158093	0.0417906	0.0140171	0
arahy.0YM1GG	ZH16_S2_vs_ZH6_S2	--	Unknown protein	4.25837	37.1947	11.8089	26.198	1.91645	6.20518	9.30905	10.1821
arahy.3D57QD	ZH16_S2_vs_ZH6_S2	--	ATP binding	0.808059	2.14145	0.216824	0.0107874	0.473429	0.570344	0.0886224	0.0372346
arahy.YHAP2I	;ZH16_S4_vs_ZH6_S4	--	alcohol dehydrogenase 1	136.431	15.8173	23.6876	9.41767	144.399	34.1566	15.8716	3.60937
arahy.8EP2TM	ZH16_S2_vs_ZH6_S2	--	putative indole-3-acetic acid-amido synthetase GH3.9	0.134107	5.95291	0.928137	0.696353	0.52222	2.00445	0.934978	0.450015
arahy.XFZ7NM	ZH16_S2_vs_ZH6_S2	--	ROP-interactive CRIB motif-containing protein 1	1.88305	1.06452	0.0191397	0	2.78211	0.10553	0.0976205	0.0761708
arahy.I9KCKB	ZH16_S2_vs_ZH6_S2	--	Protein kinase superfamily protein	0.959152	10.305	1.73233	2.44363	0.655689	3.14077	1.81729	2.10941
Novel00514	ZH16_S1_vs_ZH6_S1	--	Myb/SANT-like DNA-binding domain protein, partial [Medicago truncatula]	4.58622	2.36423	1.90897	2.0695	1.23135	1.41866	1.34735	0.474337
Novel03985	ZH16_S4_vs_ZH6_S4	--	--	2.39269	6.44186	8.42111	10.3461	2.69858	4.92798	6.02307	4.33678
arahy.EXN1BD	ZH16_S4_vs_ZH6_S4	--	peptide transporter 5	21.9014	39.6915	15.2126	6.89843	24.6702	39.6246	14.1425	2.53118
arahy.KIJ6SB	ZH16_S2_vs_ZH6_S2	--	CRS2-associated factor 1	3.16495	80.4031	5.52818	2.72371	2.49114	34.1503	8.12807	4.58941
arahy.G81GNA	ZH16_S1_vs_ZH6_S1	--	Calcium-binding EF-hand family protein	6.35177	2.35607	7.32424	4.3864	2.96634	1.07777	8.5098	4.79072
arahy.UYA8EU	ZH16_S4_vs_ZH6_S4	--	isoflavone reductase homolog 2 [Glycine max]	8.87158	537.561	27.8245	9.5802	7.88007	386.365	53.643	2.81194
arahy.HQA39L	ZH16_S1_vs_ZH6_S1	--	uncharacterized protein LOC100792646 isoform X2 [Glycine max]	0.564591	0.507486	0.0277037	0.00723187	0.144191	0.266527	0.0624582	0.0235009
arahy.KW5NHF	ZH16_S3_vs_ZH6_S3	--	beta galactosidase 1	7.90089	14.4806	19.8704	10.7675	11.4617	13.4228	9.10557	6.44948
arahy.G3UT94	ZH16_S2_vs_ZH6_S2	--	adenylate kinase 8-like [Glycine max]	4.20682	13.8796	5.36717	4.06951	3.16086	6.28763	5.41785	3.26337
arahy.SQ83HC	ZH16_S1_vs_ZH6_S1	--	Unknown protein	2.39577	5.52812	2.60334	2.34558	1.18779	4.44314	2.93475	2.84311
arahy.MR6WYG	ZH16_S3_vs_ZH6_S3	--	cytochrome P450, family 718	27.7701	0.65556	1.25392	0.261743	32.9168	1.02985	0.435197	0.120112
arahy.VZS9XU	ZH16_S1_vs_ZH6_S1	--	uncharacterized protein LOC102662195 [Glycine max]	13.6281	0.203991	0.878292	0.809715	5.16368	0.0545761	0.581004	0.613501
arahy.BD6EDT	ZH16_S1_vs_ZH6_S1	--	polyvinylalcohol dehydrogenase-like protein	1.54804	1.3766	2.03296	1.28209	0.0541338	0.213	0.0733013	0
Novel01856	ZH16_S2_vs_ZH6_S2	--	--	0.101655	1.53746	0.543456	0.326368	0	0	0	0
arahy.K6DY9R	ZH16_S2_vs_ZH6_S2	--	Unknown protein	3.42022	6.3689	4.78952	3.25272	0.730806	0	0.453522	0
arahy.A91ASK	ZH16_S2_vs_ZH6_S2	--	sugar porter (SP) family MFS transporter	49.4959	5.93523	0.890951	0.986269	34.7566	2.77656	1.27767	0.643514
arahy.EABL5T	;ZH16_S3_vs_ZH6_S3	--	putative nuclease HARBI1-like [Glycine max]	4.7954	3.81685	44.761	0.739901	17.846	4.602	9.54201	0.60361
arahy.TU4N0L	ZH16_S1_vs_ZH6_S1	B3	B3 DNA-binding domain protein	1.45339	16.5815	5.39281	3.56515	0.176536	12.1742	5.50287	2.95042
arahy.QDYD89	ZH16_S2_vs_ZH6_S2	--	Membrane transporter D1 n=3 Tax=Andropogoneae RepID=B6U4Q3_MAIZE	59.1383	123.19	2.2312	0.210656	78.9452	54.6678	6.9604	0.506342
arahy.L9RWF4	ZH16_S1_vs_ZH6_S1	--	actin-related protein 2/3 complex subunit 5	14.2354	13.8565	9.10751	7.54614	3.58256	7.58263	6.1971	3.5455
arahy.RR76TU	ZH16_S4_vs_ZH6_S4	--	protein notum homolog isoform X2 [Glycine max]	0	15.547	2.53065	2.39608	0.0202661	10.1758	2.18152	0.875992
arahy.H7SS2X	ZH16_S3_vs_ZH6_S3	--	acyl-CoA synthetase 5	2.02196	0.423351	1.13912	0.56634	0.962921	0.214312	0.304371	0.315944
arahy.U0TDM7	;ZH16_S3_vs_ZH6_S3	TALE	BEL1-like homeodomain protein 1-like isoform X4 [Glycine max]	23.1836	1.54163	9.43104	4.47493	41.4784	5.07909	4.74569	3.14178
Novel04495	ZH16_S2_vs_ZH6_S2	--	6b-interacting protein 2 [Nicotiana tabacum]	0.280133	2.33427	0.654753	0.571375	0.101452	0.140697	0.0588745	0
arahy.H3724C	ZH16_S2_vs_ZH6_S2	--	laccase 10	0.590587	24.8041	0.545695	0.199677	1.21783	9.90485	1.37517	0.121716
Novel01824	ZH16_S3_vs_ZH6_S3	--	PREDICTED: polynucleotide 3'-phosphatase ZDP-like isoform X3 [Glycine max]	0.0345251	0	6.98367	0	0.0794878	0.0441391	0.0215265	0
arahy.UA6S11	ZH16_S1_vs_ZH6_S1	BSD	oxidoreductase, 2OG-Fe(II) oxygenase family protein	46.218	0.645863	1.56232	1.62369	22.5589	0.887897	1.45009	1.83305
arahy.X8Y7H8	ZH16_S3_vs_ZH6_S3	--	cell number regulator 8-like [Glycine max]	24.2526	11.6977	11.6541	8.20333	25.304	8.286	2.31184	3.64263
arahy.KF4QTS	;ZH16_S2_vs_ZH6_S2	--	serine/threonine-protein kinase TIO-like [Glycine max]	0	1.5899	0.293287	0.114351	0.166402	0.128663	0.0713705	0
arahy.1PW3KD	ZH16_S1_vs_ZH6_S1	--	ALG-2 interacting protein X-like [Glycine max]	6.11295	11.677	29.5979	15.4028	2.47353	16.5326	29.1986	17.9247
arahy.LZQ0FA	ZH16_S1_vs_ZH6_S1	--	nucleotide-binding	4.12244	5.66015	6.31568	4.73143	1.62467	7.11924	4.41006	2.80525
arahy.WLS58Y	ZH16_S3_vs_ZH6_S3	--	GDSL-like Lipase/Acylhydrolase superfamily protein	29.8288	0.160008	2.11644	0.189106	15.987	0.124496	0.258596	0.0780871
arahy.FIT9JY	ZH16_S4_vs_ZH6_S4	--	aspartic proteinase A1	560.461	24.0171	11.5066	71.3155	378.621	22.7684	14.9245	33.4776
arahy.NMYG6B	ZH16_S1_vs_ZH6_S1	--	ser/thr-rich protein T10 in DGCR region-like protein	18.2882	1.60757	2.52586	0.985775	6.51761	1.73876	2.89393	0.885616
Novel02660	ZH16_S1_vs_ZH6_S1	--	--	3.29074	6.58404	24.9324	17.0953	1.29935	7.02586	21.9434	25.8989
Novel03828	ZH16_S2_vs_ZH6_S2	--	Oligopeptide transporter 7 [Glycine soja]	0.125814	3.99969	0.906124	0.395513	0.137003	0.454096	0.282347	0.106353
arahy.D2JIWD	ZH16_S2_vs_ZH6_S2	--	laccase 17	1.02012	1.10444	0.194131	0.0441815	0.398073	0.0421868	0	0
arahy.ZWR48E	;ZH16_S4_vs_ZH6_S4	--	Unknown protein	128.418	21.9025	59.7762	33.4904	210.382	64.5292	29.2234	7.02111
arahy.YQ4454	;ZH16_S3_vs_ZH6_S3	--	Disease resistance protein (CC-NBS-LRR class) family	0.0284273	0.807132	0.791984	0.40952	0.19318	0.932451	0.163702	0.268026
arahy.92CKA2	ZH16_S1_vs_ZH6_S1	--	phosphatidylinositol 4-phosphate 5-kinase 4-like [Glycine max]	14.5558	7.7242	4.35132	4.61001	6.9822	10.1284	3.43073	2.6926
arahy.4D26T3	ZH16_S2_vs_ZH6_S2	--	Protein kinase superfamily protein	8.13565	23.8436	6.47612	7.01238	4.80792	8.39178	6.6621	7.0552
Novel02032	ZH16_S1_vs_ZH6_S1	--	T4.5 [Malus x robusta]	2.21224	0.417824	1.84881	7.16756	0.704015	0.3932	1.31928	5.88145
arahy.M4RITN	ZH16_S1_vs_ZH6_S1	--	DNA binding protein, putative n=1 Tax=Ricinus communis RepID=B9REN7_RICCO	1.22218	0.728712	0.444054	0	0	0.323009	0	0
arahy.TAB5NL	ZH16_S2_vs_ZH6_S2	--	RNA-binding protein 42-like [Glycine max]	10.4334	9.51688	10.7061	8.28404	8.28025	4.6399	8.19166	8.00445
arahy.JC6E3B	ZH16_S1_vs_ZH6_S1	--	tubulin beta chain 2	101.941	73.5442	32.0223	15.9466	51.2078	78.7834	26.6501	11.0459
arahy.0N6LTB	ZH16_S1_vs_ZH6_S1	--	Flavin-binding monooxygenase family protein	97.2614	0.240325	0.218819	0.372596	31.2114	0.627481	0.40242	0.359276
arahy.UY7CFX	ZH16_S1_vs_ZH6_S1	--	methyltransferase-like protein 10-like [Glycine max]	14.8465	12.7208	8.82425	7.45001	6.03405	6.91893	4.47864	2.84274
arahy.DWP65P	ZH16_S1_vs_ZH6_S1	--	type I inositol 1,4,5-trisphosphate 5-phosphatase CVP2-like [Glycine max]	8.22128	1.94779	0.28817	0.372693	3.51902	2.39161	0.917926	0.430055
arahy.3B2HJD	;ZH16_S2_vs_ZH6_S2	--	salicylic acid carboxyl methyltransferase	3.64155	5.36572	0.899574	0.672027	11.5569	1.68089	0.797032	0.517859
arahy.65ZHYZ	;ZH16_S2_vs_ZH6_S2	TF	heat shock transcription factor B4	0	40.665	0.15361	0.153825	0.391837	12.8192	2.07061	0.143885
Novel02462	ZH16_S2_vs_ZH6_S2	--	Serine hydroxymethyltransferase, mitochondrial [Glycine soja]	8.84056	58.2139	11.2504	22.8088	5.90648	20.7488	12.6849	13.819
arahy.HJY3CU	ZH16_S2_vs_ZH6_S2	--	Peroxidase superfamily protein	7.60969	2.71552	0.110492	0.040515	8.30165	0.392531	0.0592126	0
arahy.ZLM6U3	ZH16_S2_vs_ZH6_S2	--	NAD-dependent malic enzyme 1	38.1973	9.99789	1.76831	0.737865	51.2693	4.02088	1.24288	0.225816
arahy.8D1EQN	ZH16_S2_vs_ZH6_S2	--	Unknown protein	1.06707	18.6901	3.46187	0.420273	0.487401	1.48392	1.42548	0.624791
arahy.02IZMF	ZH16_S2_vs_ZH6_S2	TF	transcription factor PIF3-like [Glycine max]	31.5732	0.870125	0.0277797	0.0207755	38.3352	0.221896	0.0303633	0.0829167
Novel04850	ZH16_S1_vs_ZH6_S1	--	PREDICTED: 3-ketoacyl-CoA synthase 6-like [Glycine max]	8.6233	0.327424	0.537593	0.33805	3.74213	1.64194	0.500042	0.0999181
arahy.PPL7HZ	ZH16_S1_vs_ZH6_S1	--	RING finger protein 126-A-like [Glycine max]	3.289	4.29044	3.38002	3.37263	1.34665	4.02817	2.4494	2.33192
Novel00719	ZH16_S2_vs_ZH6_S2	--	hypothetical protein glysoja_043054 [Glycine soja]	6.33937	23.4565	8.7102	10.3838	3.69289	7.38471	5.3654	5.52822
arahy.S9X4NH	ZH16_S3_vs_ZH6_S3	--	purine permease 10	89.7739	1.47949	4.25252	1.6644	43.2078	1.96851	1.42137	1.22573
arahy.KRC5M1	;ZH16_S2_vs_ZH6_S2	AUX/IAA	Auxin-responsive protein n=2 Tax=Populus RepID=B9GWR2_POPTR	25.5747	41.9024	1.7111	2.09615	62.1715	15.3989	2.93051	2.44408
Novel01316	ZH16_S1_vs_ZH6_S1	--	probable inorganic phosphate transporter 1-7-like [Glycine max]>gi|571552914|ref|XP_006603729.1| PREDICTED: probable inorganic phosphate transporter 1-7-like isoform X1 [Glycine max]>gi|389828590|gb|AFL02621.1| soybean phosphate transporter protein 11 [Glycine max]	2.73091	5.41771	0.89553	0.496269	1.05928	2.42583	1.09418	0.908294
arahy.97V9F3	ZH16_S2_vs_ZH6_S2	--	glycoside hydrolase family 81 protein	0.0686334	0.954794	0.963004	0.457345	0	0	0	0
arahy.A9E03W	ZH16_S4_vs_ZH6_S4	--	serine carboxypeptidase-like 48	14.7755	217.321	47.2089	20.7964	24.4256	194.906	37.9587	8.99481
arahy.H8WHKS	ZH16_S2_vs_ZH6_S2	--	1-aminocyclopropane-1-carboxylate oxidase	491.624	75.2647	21.2902	24.7734	413.845	28.6951	18.0106	32.1964
arahy.S1T1W9	ZH16_S1_vs_ZH6_S1	--	Pentatricopeptide repeat (PPR) superfamily protein	1.13654	2.80359	1.08438	0.922351	0.353286	1.34647	0.982362	0.711203
Novel03238	ZH16_S3_vs_ZH6_S3	--	unknown [Arachis hypogaea]	0	0	3.51223	2.88308	0.031749	0.20033	0.649084	3.99491
arahy.IEA635	ZH16_S1_vs_ZH6_S1	--	2-oxoglutarate (2OG) and Fe(II)-dependent oxygenase superfamily protein	3.02737	9.8014	1.47311	2.29375	0.63024	6.88494	2.96161	5.12794
arahy.S0G01J	;ZH16_S3_vs_ZH6_S3	--	cysteine proteinase1	20.201	5.05059	11.7881	2.99952	28.8938	10.1914	5.47329	1.9994
arahy.ZDDP39	ZH16_S3_vs_ZH6_S3	--	uncharacterized protein LOC102667538 [Glycine max]	49.0608	0.270349	4.03659	0.629184	56.6954	0.258131	1.04565	0.38869
arahy.1DL5MS	ZH16_S1_vs_ZH6_S1	--	ATP-binding/protein serine/threonine kinase n=1 Tax=Medicago truncatula RepID=G7L7B9_MEDTR	1.20422	18.9163	3.87923	2.59756	0.500892	12.2552	3.65773	1.65597
arahy.F717DE	ZH16_S2_vs_ZH6_S2	--	F-box protein At1g10780-like [Glycine max]	1.10405	6.46487	3.60282	3.79878	0.110121	0	0.397599	0
arahy.TYJ1PE	ZH16_S2_vs_ZH6_S2	SBP	squamosa promoter-binding protein-like 12	0.831976	7.41699	0.0831694	0.129142	0.851865	3.01355	0.718024	0
arahy.20NM7L	ZH16_S1_vs_ZH6_S1	TF	YABBY transcription factor	79.5599	0.755274	0.837392	1.03338	33.3595	1.43644	0.949531	0.806261
arahy.ZJZP2C	ZH16_S3_vs_ZH6_S3	--	uncharacterized protein At2g29880-like [Glycine max]	0.0641812	0.237108	0.611207	0.698963	0	0.120757	0	0
arahy.R6WLGC	ZH16_S2_vs_ZH6_S2	--	TPX2 (targeting protein for Xklp2) protein family	0.168437	3.76775	0.728274	0.117127	0.354946	0.0928096	0.0178009	0
arahy.HFR303	ZH16_S2_vs_ZH6_S2	TF	transcription factor bHLH35-like [Glycine max]	0.0370401	106.795	3.87434	1.03898	0.0805357	51.2214	9.97656	0.252269
Novel00624	ZH16_S4_vs_ZH6_S4	--	unknown [Glycine max]	1.23965	3.36697	2.18318	2.19318	0.462746	1.57908	0.719384	0.178887
arahy.P271UT	ZH16_S2_vs_ZH6_S2	--	alpha-L-arabinofuranosidase 1	0.0342361	474.347	11.2428	0.25293	0.195526	214.038	30.5565	0.531747
arahy.WHT2R9	ZH16_S1_vs_ZH6_S1	--	K+ efflux antiporter 4	14.5172	3.71268	2.36421	2.54436	7.19615	2.69123	2.3791	2.57837
arahy.1E3WXN	ZH16_S1_vs_ZH6_S1	--	auxin-induced protein 13	1.56601	0.475025	1.78566	1.86323	0.422407	1.17786	1.88447	1.01568
arahy.N5P3C8	ZH16_S1_vs_ZH6_S1	--	RINT1-like protein-like [Glycine max]	6.40976	0.357375	0.251204	0.230802	0.543231	1.51939	0.30955	0.337019
arahy.QHLN3W	ZH16_S1_vs_ZH6_S1	--	uncharacterized protein LOC100788676 isoform X1 [Glycine max]	12.4778	3.43878	1.32645	1.35349	4.81984	3.24643	1.53135	1.62809
Novel01861	ZH16_S4_vs_ZH6_S4	--	--	0.679392	2.1033	1.08902	1.89548	0.623009	1.98119	2.40642	0
arahy.G3VF9V	ZH16_S1_vs_ZH6_S1	--	50S ribosomal protein L9, chloroplastic-like isoform X3 [Glycine max]	6.15675	5.45782	1.81569	1.47666	2.79909	4.85516	3.4504	2.54878
Novel02386	ZH16_S2_vs_ZH6_S2	--	Leucine-rich repeat receptor-like protein kinase TDR [Glycine soja]	0.0553343	2.85482	0.609985	0.123359	0.0602555	0.48734	0.226942	0.268331
arahy.WE7CEL	ZH16_S2_vs_ZH6_S2	--	prolyl 4-hydroxylase subunit alpha-1-like [Glycine max]	0.70538	4.93331	0.877678	1.15088	0.696069	1.30103	0.473255	0.429652
arahy.3ATP19	ZH16_S4_vs_ZH6_S4	--	3-ketoacyl-CoA synthase 19	0.0227724	23.904	10.1482	6.13962	0	33.6352	7.92533	1.97659
arahy.2500MY	ZH16_S2_vs_ZH6_S2	--	hypothetical protein	29.7226	99.3784	4.25405	3.03347	22.5699	31.6808	6.88931	3.13665
arahy.VZ1TQJ	ZH16_S4_vs_ZH6_S4	--	3-ketoacyl-CoA synthase 19	0.0353282	34.83	13.1662	7.94334	0.119007	47.6938	11.1418	3.46697
arahy.VD813B	ZH16_S3_vs_ZH6_S3	--	peroxisomal (S)-2-hydroxy-acid oxidase GLO1	2.8356	1.97198	1.49561	0.537556	5.11603	2.27151	0.433752	0.276889
arahy.HE8J5U	;ZH16_S4_vs_ZH6_S4	--	flavanone 3-hydroxylase [Glycine max]	0.868802	137.864	61.2067	21.5574	3.88009	185.686	42.833	8.27081
arahy.DJ6LD0	;ZH16_S4_vs_ZH6_S4	--	UPF0481 protein [Glycine max]	0.0270095	0.0387673	3.05909	2.99135	0.214265	0.666803	1.15178	0.662758
arahy.3VMA9Y	;ZH16_S3_vs_ZH6_S3	--	beta-amylase 1	5.81681	2.28716	9.23616	3.0821	12.7251	2.16421	4.17625	2.60134
Novel05035	ZH16_S2_vs_ZH6_S2	--	--	1.66066	9.09439	0.429372	0.536763	0.16575	0.335448	0	0
arahy.S6RW25	ZH16_S4_vs_ZH6_S4	TF	MADS-box transcription factor 6 [Glycine max]	1.50292	10.0488	2.78447	2.04085	0.536216	4.76078	1.07568	0.170138
arahy.A1BB80	ZH16_S2_vs_ZH6_S2	--	Unknown protein	0	106.117	0.0493836	0	0	25.6287	3.50839	0
arahy.ZX85RL	ZH16_S2_vs_ZH6_S2	--	receptor-like kinase 1	2.45663	6.69969	3.3147	2.01776	1.11252	0.865214	0.851996	0.854366
arahy.KPN1N6	ZH16_S1_vs_ZH6_S1	--	Single-stranded nucleic acid binding R3H domain protein n=2 Tax=Cyanothece RepID=B7K2D2_CYAP8	1.89705	0.719903	0.795797	0.86838	0.409114	0.512098	0.462662	0.226912
arahy.MTM7TL	ZH16_S3_vs_ZH6_S3	--	Pentatricopeptide repeat (PPR) superfamily protein	3.21949	2.27858	1.83036	1.75616	2.90965	2.41602	0.797558	1.42504
arahy.NZ9422	ZH16_S1_vs_ZH6_S1	--	multiple C2 and transmembrane domain-containing protein 2-like [Glycine max]	3.97147	4.93687	0.5124	0.534514	1.82858	2.58591	0.760179	0.539281
arahy.VN0MC0	ZH16_S4_vs_ZH6_S4	--	RING/U-box superfamily protein	2.03056	9.45626	2.29754	1.15741	1.2046	15.378	2.51917	0.0676625
arahy.ES7A38	ZH16_S4_vs_ZH6_S4	--	cysteine proteinase1	10.848	11.6848	23.3365	7.77596	18.486	21.9442	12.4493	3.54522
arahy.H0NQDU	ZH16_S2_vs_ZH6_S2	--	Unknown protein	0	456.122	1.22492	0.0825461	0	188.671	23.8251	0.127578
Novel04393	ZH16_S4_vs_ZH6_S4	--	hypothetical protein MTR_0909s0020 [Medicago truncatula]	2.17845	23.5253	6.7095	9.49916	1.55583	12.6976	4.34103	3.80604
Novel02348	ZH16_S2_vs_ZH6_S2	--	--	0.940462	7.52053	0.96596	1.37292	0.415799	2.27922	0.965769	0.60968
arahy.229YTE	ZH16_S2_vs_ZH6_S2	--	sterol 3-beta-glucosyltransferase UGT80A2-like isoform X4 [Glycine max]	0.505988	5.74647	5.28321	8.26106	0.139856	2.14013	4.8126	5.07253
Novel04885	ZH16_S2_vs_ZH6_S2	--	--	0.0339427	4.44125	1.22877	3.39099	0	0.928194	0.870461	1.87061
arahy.6VXG05	ZH16_S1_vs_ZH6_S1	--	Defensin MtDef4.7	3.96532	9.11331	726.577	722.329	1.12245	21.1246	462.816	477.158
arahy.97MZ99	ZH16_S2_vs_ZH6_S2	--	late embryogenesis abundant D-like protein	0	0.781887	1.80695	11.7898	0	0.031003	1.22589	4.28155
arahy.QPBR19	ZH16_S1_vs_ZH6_S1	--	Tetratricopeptide repeat (TPR)-like superfamily protein	10.4461	11.0351	0.250308	1.17171	4.53696	9.08516	1.468	2.65891
arahy.57D8KW	ZH16_S2_vs_ZH6_S2	--	Unknown protein	0.191093	4.60796	1.79246	1.09753	0.261002	0.0666974	0	0
arahy.YQ7Q14	ZH16_S2_vs_ZH6_S2	--	Unknown protein	0.0750034	202.864	3.36	1.81193	0.0371025	77.6948	12.3418	0.53272
arahy.T12MEB	ZH16_S2_vs_ZH6_S2	--	terpene synthase 1	0.0527105	1.80822	0.690346	0.914417	0.0964664	0	0	0
arahy.H6APGL	ZH16_S1_vs_ZH6_S1	--	mediator of RNA polymerase II transcription subunit 33A-like [Glycine max]	5.95669	1.24087	1.14573	1.00117	2.60282	1.00084	0.504085	0.59713
arahy.CFLV5S	;ZH16_S2_vs_ZH6_S2	TALE	BEL1-like homeodomain protein 2-like isoform X3 [Glycine max]	3.37247	2.19978	0.145222	0.12732	6.95443	0.337681	0.084618	0.096697
arahy.T7N4G8	ZH16_S1_vs_ZH6_S1	--	ATP binding/protein serine/threonine kinase [Glycine max]	10.0496	8.46161	1.36728	0.720166	4.465	5.93548	1.00065	0.583272
arahy.X0XBNQ	ZH16_S2_vs_ZH6_S2	--	chromatin assembly factor 1 subunit FAS1-like [Glycine max]	7.98835	187.111	14.0625	6.55086	5.02254	64.168	12.3509	4.31939
Novel04202	ZH16_S3_vs_ZH6_S3	--	PREDICTED: F-box protein At4g18380-like [Populus euphratica]	2.68833	5.17083	3.37389	0.884176	3.04923	3.6826	1.25503	0.531305
arahy.T0XMQ2	ZH16_S4_vs_ZH6_S4	--	IAA-amino acid hydrolase ILR1-like protein	0.359655	11.6343	3.21908	2.87226	0.318619	11.0417	3.03196	0.543183
arahy.3HD1EN	ZH16_S4_vs_ZH6_S4	--	uncharacterized protein LOC100791257 [Glycine max]	7.3923	9.20033	11.1729	4.97035	10.572	17.7771	5.96033	1.47926
arahy.0E9YFP	ZH16_S2_vs_ZH6_S2	--	Membrane transporter D1 n=3 Tax=Andropogoneae RepID=B6U4Q3_MAIZE	64.6285	179.869	3.95119	0.456941	75.0458	65.4196	8.62625	0.340623
arahy.WMY7WD	ZH16_S2_vs_ZH6_S2	--	GTP-binding nuclear protein Ran-3 [Glycine max]	6.36917	41.8392	4.4076	9.8601	5.01069	12.4615	5.42913	3.98539
arahy.I49WQS	ZH16_S1_vs_ZH6_S1	--	Methionine S-adenosyl transferase n=1 Tax=Detonula confervacea RepID=B9ZZX3_DETCO	6.91863	0.793527	0.325156	0.176172	3.18836	0.332314	0.18029	0.0561403
arahy.W977IP	ZH16_S4_vs_ZH6_S4	--	alpha-glucosidase	0.109005	303.842	22.1742	0.941852	0.228966	292.995	38.3996	0.213266
arahy.J6MGBA	ZH16_S2_vs_ZH6_S2	--	plasma membrane H+-ATPase	0.486082	22.6342	23.8309	31.4998	0.665639	8.2945	46.4972	49.0592
arahy.Q570SP	ZH16_S1_vs_ZH6_S1	--	Pollen Ole e 1 allergen and extensin family protein	1.17785	17.3494	7.24126	2.6946	0.225491	8.76581	4.21225	0.925657
Novel00302	ZH16_S1_vs_ZH6_S1	--	replication factor-A carboxy-terminal domain protein [Medicago truncatula]	4.39418	1.88818	0.134717	0.0502141	0	0.547136	0.256356	0.065497
arahy.BD0880	ZH16_S3_vs_ZH6_S3	--	putative phospholipid-transporting ATPase 9-like isoform X1 [Glycine max]	0.795551	3.27176	2.62739	2.06929	0.795572	2.44163	1.15629	1.32323
arahy.8KP8XF	ZH16_S2_vs_ZH6_S2	--	Unknown protein	2.8204	10.4875	8.9098	9.41947	1.69567	4.12897	5.96822	6.41948
arahy.WRP4Q5	ZH16_S2_vs_ZH6_S2	--	Flavin-binding monooxygenase family protein	0.0330285	57.5474	0.557385	0.233154	0.297736	8.03324	1.17685	0.125637
arahy.RRDD93	ZH16_S1_vs_ZH6_S1	--	uncharacterized protein LOC100813272 [Glycine max]	5.67574	6.04006	4.19857	2.58596	2.61833	5.68731	4.56353	2.53153
arahy.BX6JSV	ZH16_S1_vs_ZH6_S1	--	pumilio-family RNA-binding repeatprotein	1.56761	4.28519	3.35127	2.09131	0.730959	3.36798	2.43592	1.84719
arahy.YP465N	ZH16_S1_vs_ZH6_S1	--	Pyruvate kinase family protein	19.1262	1.47903	1.49918	0.368157	0.997673	1.53932	7.0551	9.73572
arahy.IN4G0D	ZH16_S2_vs_ZH6_S2	--	Unknown protein	3.83031	14.9547	6.6213	5.68406	3.95093	5.68604	3.50266	3.14608
arahy.SL0YTQ	ZH16_S2_vs_ZH6_S2	--	Unknown protein	0.967242	3.51067	0.955764	0.416186	0.781349	1.65287	0.9139	0.488668
arahy.HBQ2MY	ZH16_S2_vs_ZH6_S2	--	DNA-directed RNA polymerase I protein	0.195488	3.02075	0.210288	1.0104	0.0344031	0.0439575	0	0
arahy.A28NZ9	ZH16_S1_vs_ZH6_S1	--	cellulose synthase 6	16.4878	9.65304	3.55275	2.21808	7.18758	6.30419	2.46802	1.46031
arahy.92QAUW	ZH16_S1_vs_ZH6_S1	--	Sugar transporter SWEET n=3 Tax=Solanum RepID=M1CBD2_SOLTU	57.3148	32.8314	7.30536	2.00435	23.3021	30.4531	6.1876	1.02826
arahy.S1GY7D	ZH16_S4_vs_ZH6_S4	--	apurinic/apyrimidinic endonuclease	12.1648	36.4568	16.2941	17.8212	6.4703	16.8831	9.01491	4.87141
arahy.L8Z3CA	ZH16_S1_vs_ZH6_S1	--	Non-specific lipid-transfer protein, putative	650.259	0.0827128	0.144058	0.0454686	262.874	0.0728468	0.0772004	0
Novel03331	ZH16_S3_vs_ZH6_S3	--	hypothetical protein PHAVU_008G042000g [Phaseolus vulgaris]>gi|561012718|gb|ESW11579.1| hypothetical protein PHAVU_008G042000g [Phaseolus vulgaris]	4.24394	2.34084	4.32623	2.15661	5.64556	2.40917	2.04392	3.31186
Novel00342	ZH16_S2_vs_ZH6_S2	--	PREDICTED: TMV resistance protein N-like [Nicotiana sylvestris]	0.753492	1.59623	0.096057	0.472453	0.141505	0.118951	0.0852878	0
arahy.425CWT	ZH16_S2_vs_ZH6_S2	--	proton pump interactor, putative	0.141362	1.37331	1.29554	0.424211	0.130184	0	0	0
Novel02431	ZH16_S2_vs_ZH6_S2	--	--	0.103344	1.4069	0.578255	0.954781	0.0517219	0.195353	0.244787	0.51523
arahy.KH5R1I	ZH16_S4_vs_ZH6_S4	--	Nutrient reservoir, putative n=1 Tax=Ricinus communis RepID=B9SKF4_RICCO	0	0.107451	2.04673	15.1067	0.0173466	0.0313915	2.84166	3.13847
arahy.B9CQCD	ZH16_S2_vs_ZH6_S2	--	DNA repair endonuclease UVH1-like protein	0.105353	3.17061	0.0675085	0.053083	0.0464672	0.094536	0.0555852	0
arahy.R0KKYG	ZH16_S3_vs_ZH6_S3	--	Protein kinase superfamily protein	10.7393	2.25695	8.52597	2.73698	5.66177	2.62272	3.10567	2.78139
arahy.UB51SX	ZH16_S1_vs_ZH6_S1	--	3-ketoacyl-CoA synthase 13	215.078	0.472146	0.803676	0.563352	59.7256	3.43657	1.2052	0.601855
arahy.M05HM0	ZH16_S4_vs_ZH6_S4	--	isoflavone reductase-like protein-like [Glycine max]	0.236913	115.151	25.3187	1.64899	0.153325	131.381	19.7885	0.0743606
arahy.BZ5ZMX	ZH16_S2_vs_ZH6_S2	--	sulfate transporter 1	4.53535	1.2081	0.0925782	0.132307	5.21442	0.454268	0.140509	0.0993311
arahy.C5T4VQ	ZH16_S4_vs_ZH6_S4	--	Unknown protein	151.702	12.6028	16.5881	13.4789	112.038	6.1581	15.4928	3.73163
arahy.E86TDY	ZH16_S2_vs_ZH6_S2	--	receptor-like kinase	2.41573	3.65798	0.491544	0.155535	2.21375	1.56682	0.475035	0.266879
arahy.ZWB5UC	ZH16_S1_vs_ZH6_S1	--	E3 ubiquitin-protein ligase BOI-like [Glycine max]	11.4452	23.1283	9.5799	10.0009	5.30937	24.7055	9.70162	5.97755
arahy.8G5XPY	ZH16_S2_vs_ZH6_S2	--	RNA-binding protein 24-A [Glycine max]	1.7994	16.6281	5.94161	5.68803	1.50937	7.88275	8.35306	5.2524
arahy.XHTA8R	ZH16_S1_vs_ZH6_S1	--	methionine sulfoxide reductase B 2	15.9749	30.7873	5.32667	5.19535	7.60221	17.2054	4.96604	4.49683
arahy.W6GX7N	ZH16_S1_vs_ZH6_S1	--	prolyl oligopeptidase family protein	23.9261	11.9467	5.13625	4.36131	10.0922	9.87017	4.02389	2.96382
Novel03937	ZH16_S2_vs_ZH6_S2	--	PREDICTED: formin-like protein 20 [Camelina sativa]	0	47.1479	0.0744137	0.0479034	0	17.3596	2.26371	0
arahy.R0159Z	ZH16_S4_vs_ZH6_S4	--	putative nuclease HARBI1-like [Glycine max]	0	0	1.85187	8.62099	0	0	0.314119	0.210683
arahy.JV9T2X	ZH16_S1_vs_ZH6_S1	bHLH	Basic helix-loop-helix (bHLH) DNA-binding family protein	3.68684	12.9139	0.971573	0.152756	1.38999	5.5174	1.23238	0.125425
arahy.JH8TMD	ZH16_S3_vs_ZH6_S3	--	chalcone synthase [Glycine max]	0.839371	1.5751	4.31037	0.549932	1.65609	4.06879	0.842491	0.232086
arahy.BFN3WA	ZH16_S1_vs_ZH6_S1	--	cysteine proteinase1	3.32215	0.215087	0.0318231	0	0.927454	2.43902	0.262078	0
arahy.MF0PDN	ZH16_S3_vs_ZH6_S3	--	cation calcium exchanger 4	36.9145	4.34391	7.92897	4.02935	43.3264	4.31359	3.37502	2.65743
arahy.BFGT2Z	ZH16_S2_vs_ZH6_S2	--	bromodomain-containing protein 4B-like isoform X2 [Glycine max]	14.4713	341.647	19.2065	6.00256	13.5987	160.642	38.3105	4.86722
arahy.58BRV0	;ZH16_S4_vs_ZH6_S4	--	probable glycosyltransferase isoform X4 [Glycine max]	4.7209	10.8738	11.864	6.75514	11.5152	14.081	7.36399	2.63609
arahy.4T0CVS	ZH16_S2_vs_ZH6_S2	--	ATP-binding microtubule motor family protein	13.0821	1.19281	0.743785	0.445078	11.0165	0.360903	0.441385	0.264777
arahy.GC88CS	ZH16_S1_vs_ZH6_S1	--	membrane magnesium transporter	23.0802	9.8651	4.69166	4.59278	8.1626	11.2004	6.9311	4.72187
arahy.W7YV9U	ZH16_S1_vs_ZH6_S1	--	Calcium-dependent lipid-binding (CaLB domain) family protein	2.60327	4.04324	2.57426	1.62856	1.17786	2.60361	1.69062	0.804958
arahy.Y3DNXR	ZH16_S1_vs_ZH6_S1	--	uncharacterized protein LOC102661207 [Glycine max]	5.11502	1.66147	1.15304	0.303895	1.74462	1.92847	0.657412	0.48401
arahy.VZVD9A	ZH16_S1_vs_ZH6_S1	--	Disease resistance-responsive (dirigent-like protein) family protein	80.3002	28.4764	5.75967	1.36739	25.3627	13.3947	2.38103	0.497946
Novel01000	ZH16_S2_vs_ZH6_S2	--	Oligoribonuclease [Medicago truncatula]	0.12942	1.12376	0.313451	0.255421	0	0.0141608	0.03692	0
Novel00060	ZH16_S2_vs_ZH6_S2	--	--	0	2.52966	0.563756	1.39638	0.0238071	0.626903	0.515775	0.678496
arahy.PS3G0C	ZH16_S1_vs_ZH6_S1	--	ubiquitin-protein ligase 1	5.66373	7.12794	5.43066	5.04703	2.39365	3.30169	2.86748	3.39198
arahy.7J23VE	ZH16_S1_vs_ZH6_S1	--	uncharacterized protein LOC100798622 isoform X2 [Glycine max]	18.6745	0	0.179353	0.077153	4.93727	0.0151179	0.0197078	0
arahy.4KDK0P	ZH16_S2_vs_ZH6_S2	--	xyloglucan endotransglucosylase/hydrolase 9	22.2912	42.2303	5.04161	1.41896	18.6635	15.1536	4.39663	0.561334
arahy.LDX8EP	;ZH16_S4_vs_ZH6_S4	--	ATP-binding ABC transporter	1.75184	0.9598	0.649382	0.769488	4.11924	1.26555	0.339761	0.122483
arahy.1WI4WZ	ZH16_S1_vs_ZH6_S1	--	hypothetical protein	94.1225	0.952735	0	0.333845	23.8972	0.278338	0.120947	0
arahy.L44J93	ZH16_S1_vs_ZH6_S1	--	Disease resistance protein (TIR-NBS-LRR class) family	4.21274	1.15571	0.423665	0.209309	1.17829	0.466127	0.162566	0.167448
Novel02290	ZH16_S3_vs_ZH6_S3	--	PREDICTED: taxadien-5-alpha-ol O-acetyltransferase-like [Glycine max]	4.1207	0.747949	6.33141	7.62109	4.08978	1.73974	2.72268	5.20394
Novel04146	ZH16_S3_vs_ZH6_S3	--	PREDICTED: endoplasmic reticulum metallopeptidase 1 isoform X2 [Cicer arietinum]	1.80429	5.88675	4.13237	0	0.100486	1.13992	0.249437	0.123857
arahy.CZPU8Y	ZH16_S1_vs_ZH6_S1	--	sugar porter (SP) family MFS transporter	79.1581	31.4952	6.55382	1.90336	35.4247	35.2231	6.9416	1.00312
Novel00818	ZH16_S4_vs_ZH6_S4	--	unknown [Glycine max]	1.39075	2.66095	2.97327	2.03088	0.417072	0.522364	0.166102	0
arahy.FI2WQ3	ZH16_S1_vs_ZH6_S1	--	probable mitochondrial chaperone BCS1-B-like [Glycine max]	12.5161	0.209228	0.20035	0.128559	0.0961459	0.0649656	0	0
arahy.U0K481	ZH16_S2_vs_ZH6_S2	--	Got1/Sft2-like vescicle transport protein family	1.45041	24.4997	0.235795	0.157908	0.654826	0.482555	0.211537	0
arahy.0SP0C0	ZH16_S1_vs_ZH6_S1	--	Electron carrier/ protein disulfide oxidoreductase n=2 Tax=Emiliania huxleyi CCMP1516 RepID=R1DDQ7_EMIHU	4.20205	4.81745	2.45976	2.10169	1.65335	3.86905	1.95645	1.5319
arahy.A1B6RB	ZH16_S2_vs_ZH6_S2	--	sugar porter (SP) family MFS transporter	34.6191	5.68144	1.16533	0.685177	29.0573	2.08413	0.642426	0.0934935
arahy.ND3FHR	ZH16_S3_vs_ZH6_S3	--	shikimate O-hydroxycinnamoyltransferase [Glycine max]	60.3834	14.8809	28.0507	14.8895	95.7049	21.9628	14.0493	10.6283
arahy.S3RXGN	;ZH16_S2_vs_ZH6_S2	--	Protein kinase superfamily protein	1.31334	1.06973	0.467515	0.508784	4.57511	0.244366	0.444021	0.216069
arahy.9S7XN2	ZH16_S2_vs_ZH6_S2	--	origin recognition complex subunit 3	0.995949	6.05535	1.27671	1.71022	1.01796	2.82349	1.47679	1.23753
arahy.D8GG75	ZH16_S1_vs_ZH6_S1	--	proline--tRNA ligase-like [Glycine max]	1.20078	3.72441	6.34855	6.7755	0.28324	3.00674	7.03609	7.59093
arahy.ZX5C9C	ZH16_S2_vs_ZH6_S2	--	histone H2A 11	6.44613	113.024	22.6174	22.2512	6.66728	48.8772	24.2331	16.0673
Novel00918	ZH16_S2_vs_ZH6_S2	--	--	0.520037	6.92359	1.06871	0.487839	0	0.0606548	0	0
arahy.IV1RYJ	ZH16_S2_vs_ZH6_S2	--	NSP-interacting kinase 3	0.123502	2.61344	0.275277	0.147424	0.0462891	0.0320543	0	0
Novel05042	ZH16_S1_vs_ZH6_S1	--	WD repeat-containing protein-like protein [Medicago truncatula]>gi|355500944|gb|AES82147.1| transducin/WD40 repeat protein [Medicago truncatula]>gi|657373790|gb|AET02950.2| transducin/WD40 repeat protein [Medicago truncatula]	16.4475	57.7526	27.3947	37.2747	7.96649	33.2485	27.5946	34.0105
Novel02081	ZH16_S3_vs_ZH6_S3	--	PREDICTED: uncharacterized protein LOC105792800 isoform X1 [Gossypium raimondii]>gi|823154348|ref|XP_012477046.1| PREDICTED: uncharacterized protein LOC105792800 isoform X1 [Gossypium raimondii]>gi|823154350|ref|XP_012477047.1| PREDICTED: uncharacterized protein LOC105792800 isoform X1 [Gossypium raimondii]	5.54638	0	0.480155	0	6.57296	0	0	0
Novel00494	ZH16_S2_vs_ZH6_S2	--	PREDICTED: putative E3 ubiquitin-protein ligase RF298 isoform X2 [Prunus mume]	4.74176	6.54232	0.657419	0.327355	7.52424	1.59401	0.447855	0.461566
Novel01532	ZH16_S3_vs_ZH6_S3	--	--	0.153286	0.0391359	2.55864	0.867954	0	0	0	0
arahy.RFY6UR	ZH16_S2_vs_ZH6_S2	TF	transcription factor bHLH35-like [Glycine max]	0	28.8702	5.70197	1.27	0.0559003	11.584	4.019	0.344967
arahy.79SS0U	ZH16_S1_vs_ZH6_S1	--	Flavin-binding monooxygenase family protein	48.6599	0.0731622	0.128246	0.102113	14.0307	0.354234	0.222893	0.443754
arahy.BL5G13	ZH16_S2_vs_ZH6_S2	--	Galactose oxidase/kelch repeat superfamily protein	1.30491	13.258	9.97661	6.51958	0.99115	6.27645	8.73519	6.4696
arahy.F1ZF7M	ZH16_S2_vs_ZH6_S2	--	ribonuclease 1	13.6139	1.69919	0	0.0338613	25.5958	0.300134	0.1533	0
arahy.4TSV6W	ZH16_S2_vs_ZH6_S2	--	Ulp1 protease family, carboxy-terminal domain protein	0.0529855	3.63222	0.86329	1.13998	0.061874	1.23136	0.483336	0.347242
arahy.U1WPAQ	;ZH16_S4_vs_ZH6_S4	--	Phosphate-responsive 1 family protein	126.829	1.60791	8.09781	2.293	295.242	5.82318	3.83514	0.36397
arahy.QXQR94	;ZH16_S2_vs_ZH6_S2	--	Flavin-binding monooxygenase family protein	0	39.5093	0.340323	0.101449	0.362929	4.57048	1.39643	0.193447
arahy.W45FS6	ZH16_S1_vs_ZH6_S1	--	CAAX prenyl protease 1 homolog [Glycine max]	2.9417	5.81744	0.593757	1.23137	1.05721	2.36157	0.691315	1.22412
Novel04688	ZH16_S3_vs_ZH6_S3	--	PREDICTED: lysM domain receptor-like kinase 3 [Cicer arietinum]	6.67608	2.74616	4.7281	2.94026	11.1689	4.55814	2.1604	1.92168
arahy.AS2KUM	ZH16_S2_vs_ZH6_S2	TF	transcription factor RADIALIS-like [Glycine max]	0.788702	19.362	0.0356955	0	1.12252	5.13047	0.936337	0
arahy.VNL2BE	ZH16_S3_vs_ZH6_S3	--	Thioredoxin superfamily protein	897.275	148.364	120.263	24.0374	825.575	158.06	61.2153	12.8752
arahy.3U22LJ	ZH16_S1_vs_ZH6_S1	--	Protein of unknown function (DUF506)	27.5751	1.77567	23.0359	1.78139	7.58179	1.65026	13.597	1.47951
arahy.A78VKF	ZH16_S4_vs_ZH6_S4	--	Glucose-methanol-choline (GMC) oxidoreductase family protein	19.6804	16.7377	4.11166	2.97847	18.6903	20.973	4.58546	1.04076
arahy.XP2WR0	ZH16_S4_vs_ZH6_S4	--	NADPH:quinone oxidoreductase	52.348	18.1057	4.35321	2.40687	50.9553	13.1329	3.77905	0.277953
arahy.H5JAQU	ZH16_S1_vs_ZH6_S1	--	ubiquitin carboxyl-terminal hydrolase 17-like [Glycine max]	1.11352	0.770084	0.936298	0.838412	0.153819	0.857102	0.62986	0.144564
arahy.3AM325	ZH16_S1_vs_ZH6_S1	--	calcium-dependent protein kinase 4	1.57046	12.5217	1.64896	1.62857	0.734178	9.1341	2.37315	1.83574
arahy.F0M84G	ZH16_S1_vs_ZH6_S1	--	cation/H+ exchanger 20	21.7362	0.169124	0.179897	0.392258	10.533	0.24955	0.23258	0.17246
Novel01144	ZH16_S2_vs_ZH6_S2	--	--	0.304396	1.32642	1.57116	1.28769	0.0273431	0.139256	0.172773	0.40443
arahy.QR1WVV	;ZH16_S3_vs_ZH6_S3	--	subtilisin-like serine protease 2	0.225615	0.20452	2.62075	1.88775	1.2793	0.691533	0.750262	1.68536
arahy.9UNY9A	ZH16_S2_vs_ZH6_S2	--	Ca2+regulated serine-threonine protein kinase family protein	1.13152	38.9908	1.09639	0.465208	0.653461	13.7597	3.6615	0.612385
arahy.2WW5Z2	ZH16_S2_vs_ZH6_S2	--	DEAD-box ATP-dependent RNA helicase	0.242523	0.852881	0.869306	0.990697	0.0798563	0	0	0
arahy.FFGR5Q	ZH16_S4_vs_ZH6_S4	--	glucan endo-1,3-beta-D-glucosidase-like [Glycine max]	2.10098	2.38196	0.355004	4.14777	6.93603	11.2827	0.836572	0.101539
Novel03769	ZH16_S2_vs_ZH6_S2	--	PREDICTED: uncharacterized protein LOC104109606 [Nicotiana tomentosiformis]	1.22351	6.04244	1.53129	2.34241	0.423538	1.43025	1.62688	1.07265
arahy.64K373	ZH16_S2_vs_ZH6_S2	--	ATP-binding ABC transporter	8.28089	2.89656	0.23356	0.0964274	5.97796	0.645841	0.281968	0.191598
arahy.DXKA3N	ZH16_S2_vs_ZH6_S2	--	monosaccharide-sensing protein 2-like isoform X2 [Glycine max]	2.18585	16.6727	2.86315	6.60304	1.5117	5.48401	2.26617	3.79262
arahy.P1EZAI	ZH16_S2_vs_ZH6_S2	--	Pentatricopeptide repeat (PPR) superfamily protein	0.26917	0.722067	0.318248	0.220885	0.0732285	0.0310423	0	0
arahy.15ZR5C	ZH16_S3_vs_ZH6_S3	--	enolase-phosphatase E1-like isoform X1 [Glycine max]	55.6764	10.2455	9.24562	6.00601	51.2991	12.6743	4.27476	3.9481
arahy.26FHM7	ZH16_S4_vs_ZH6_S4	--	Unknown protein	0	27.8298	5.55037	8.36642	0	23.0534	11.0872	1.08393
arahy.QNIR3T	ZH16_S2_vs_ZH6_S2	--	centromere protein S-like isoform X3 [Glycine max]	0.33698	10.2783	2.04481	2.67221	0.690947	3.63263	2.9779	3.13028
arahy.JF11I2	ZH16_S2_vs_ZH6_S2	--	DEAD-box ATP-dependent RNA helicase	1.17494	2.6635	0.52709	0.53574	0.77189	0.524467	0.0516148	0.0704817
arahy.WV9N0T	ZH16_S3_vs_ZH6_S3	--	glutamate receptor 2	26.9727	1.35396	0.474618	0.252149	23.8913	0.515246	0.100551	0.200185
arahy.WT3AEF	ZH16_S4_vs_ZH6_S4	--	early nodulin-related	0	6.36818	2.19244	11.7514	0.095072	9.66853	3.11808	2.89588
arahy.Q07BGG	;ZH16_S3_vs_ZH6_S3	--	Late embryogenesis abundant (LEA) hydroxyproline-rich glycoprotein family	34.9083	1.75975	8.37239	2.13235	30.4185	4.8131	3.13396	2.69048
arahy.01B6ZB	ZH16_S4_vs_ZH6_S4	--	probable galacturonosyltransferase 15-like [Glycine max]	3.1398	22.1679	6.60955	6.1333	2.02204	11.986	3.56596	0.609221
arahy.Y583I3	ZH16_S4_vs_ZH6_S4	--	Glycosyl hydrolase family protein with chitinase insertion domain	11.2604	13.5785	5.882	3.93115	6.23579	10.3512	2.47351	0.254317
arahy.IS373J	ZH16_S2_vs_ZH6_S2	--	Pentatricopeptide repeat (PPR) superfamily protein	0.163969	2.05386	1.21791	1.00474	0.134921	0.451318	0.370114	0.413349
arahy.IB4LGX	ZH16_S4_vs_ZH6_S4	--	transmembrane amino acid transporter family protein	19.601	31.9328	10.055	6.9076	30.0292	42.5144	10.1144	1.826
arahy.41W2JL	ZH16_S1_vs_ZH6_S1	--	NAD(P)-binding Rossmann-fold superfamily protein	20.1799	0.208562	0	0	9.20941	0.152647	0.0601764	0.036518
arahy.C93UP7	ZH16_S1_vs_ZH6_S1	--	Transmembrane amino acid transporter family protein	2.82253	1.29555	0.52337	1.04728	0.275963	0.348855	0.974513	1.46115
arahy.UB5781	ZH16_S3_vs_ZH6_S3	--	60S ribosomal protein L27-1	1.37261	6.3833	8.77661	0.345706	0.295547	5.84233	1.04044	0.265841
arahy.7I5RUK	ZH16_S3_vs_ZH6_S3	--	leguminosin group485 secreted peptide	171.871	7.66634	17.5129	2.42992	89.5355	5.84378	2.51509	0
arahy.5YKU94	ZH16_S2_vs_ZH6_S2	--	nitrate transporter 1.7	0	175.011	0.320869	0.0393961	0.0421619	52.8289	7.23586	0.025984
arahy.51RKDV	ZH16_S4_vs_ZH6_S4	--	LRR and NB-ARC domain disease resistance protein	1.58318	2.58467	3.4251	2.73161	1.75003	3.00375	2.07951	1.0756
arahy.K8H9R8	ZH16_S4_vs_ZH6_S4	--	Cytochrome P450 superfamily protein	4.89396	64.3755	30.5744	4.18311	4.6829	82.5031	18.0482	1.44785
arahy.1WBZ5F	ZH16_S1_vs_ZH6_S1	--	lactate/malate dehydrogenase family protein	3.63219	2.84367	2.43706	2.19171	1.00293	0.850151	1.8439	1.55304
arahy.96VLZ9	ZH16_S3_vs_ZH6_S3	TF	transcription factor MYC2-like [Glycine max]	16.6517	5.60633	10.9304	5.67238	13.6928	7.12537	4.92645	2.59942
arahy.K52S6H	ZH16_S3_vs_ZH6_S3	--	Patatin-like phospholipase family protein	8.24002	1.81126	1.18383	0.84082	6.83414	1.86703	0.536635	1.19803
arahy.34XY90	ZH16_S1_vs_ZH6_S1	--	unknown protein	9.47969	0.930487	2.63591	7.43514	0.3519	6.74297	0.793475	14.4137
arahy.8F7PE4	ZH16_S4_vs_ZH6_S4	--	Cytochrome P450 superfamily protein	7.33976	75.7055	46.2172	7.56227	10.0737	112.05	24.4074	1.63025
arahy.0RIH3A	ZH16_S1_vs_ZH6_S1	--	sulfate transporter 1	16.2107	3.31859	0.560886	0.533416	6.04257	1.82886	0.860912	1.06358
Novel04669	ZH16_S4_vs_ZH6_S4	--	PREDICTED: serine/threonine-protein kinase TOUSLED [Beta vulgaris subsp. vulgaris]>gi|870853109|gb|KMT04990.1| hypothetical protein BVRB_7g171520 [Beta vulgaris subsp. vulgaris]	3.06747	13.8938	9.09644	9.9745	2.69567	11.5149	6.39542	3.84973
Novel01462	ZH16_S2_vs_ZH6_S2	--	hypothetical protein CISIN_1g009744mg [Citrus sinensis]	0	2.40761	2.07933	2.29077	0.185716	0.44827	1.49681	1.30455
arahy.FZV4HQ	ZH16_S2_vs_ZH6_S2	--	uncharacterized protein LOC100804073 isoform X1 [Glycine max]	0.276536	4.60251	1.12841	0.229204	0.111951	0.351363	0.341086	0.151939
arahy.HKX9QT	ZH16_S1_vs_ZH6_S1	--	ATP-dependent zinc metalloprotease FtsH-like [Glycine max]	0.732076	1.50649	0.585019	0.335273	0.0538619	0.210142	0.0293931	0
arahy.T9QL6M	ZH16_S4_vs_ZH6_S4	--	Unknown protein	0.0623547	1.38434	0.809813	2.16284	0.0655011	1.34763	0.377697	0
Novel02707	ZH16_S1_vs_ZH6_S1	--	DUF247 domain protein [Medicago truncatula]	0.867763	0.370759	0.579471	0.177754	0.0864849	0.527764	0.220333	0.259676
arahy.W3TTRY	ZH16_S2_vs_ZH6_S2	--	ADP-ribosylation factor GTPase-activating protein AGD3-like [Glycine max]	1.50265	26.1486	7.80698	7.43856	0.840756	10.0229	6.78958	4.25227
arahy.I3KG3W	ZH16_S1_vs_ZH6_S1	--	uncharacterized protein LOC100807449 isoform X2 [Glycine max]	1.35504	0.216167	0.0435223	0.0968168	0.224039	0.0315762	0	0
arahy.D33YE9	ZH16_S3_vs_ZH6_S3	--	auxin transporter-like protein 1-like [Glycine max]	30.6399	0.342262	1.4774	0.786555	38.9521	0.226439	0.475009	0.866917
Novel00080	ZH16_S3_vs_ZH6_S3	--	PREDICTED: UDP-glucuronate 4-epimerase 1-like [Glycine max]	88.6734	4.5051	13.9761	1.35028	104.121	5.97176	2.99716	0.491335
arahy.PDIM12	ZH16_S4_vs_ZH6_S4	--	Unknown protein	0.0842022	3.79461	1.53651	6.14554	0	1.52478	0.362526	0.189314
arahy.J9L7AQ	ZH16_S1_vs_ZH6_S1	--	Unknown protein	3.75513	1.35174	1.46821	1.08364	0.13467	0.278912	0.630239	0.489408
Novel04190	ZH16_S2_vs_ZH6_S2	--	--	0.0516941	2.86822	0.306225	1.69605	0.0177263	0.371197	0.0120014	0.403622
arahy.YJFK71	ZH16_S1_vs_ZH6_S1	--	Protein kinase superfamily protein	6.10267	6.80885	2.64601	2.70334	1.39687	2.71761	1.44768	2.01004
arahy.S7AZH9	ZH16_S3_vs_ZH6_S3	--	Protein kinase family protein	2.43228	0.08397	1.96142	0.918693	2.99632	0.15545	0.653077	0.296619
arahy.L1PEYH	ZH16_S1_vs_ZH6_S1	--	annexin 8	1.67598	11.0006	7.16271	3.73141	0.373581	4.81147	9.24823	5.59471
arahy.4NEG3Q	ZH16_S1_vs_ZH6_S1	--	metalloendopeptidase/zinc ion-binding protein	1.3042	1.8635	1.98812	6.47657	0.0446604	0.915105	1.9149	2.68848
Novel03323	ZH16_S2_vs_ZH6_S2	--	--	0.167024	3.23305	0.19287	0.60801	0	0.239237	0.0963256	0
Novel00987	ZH16_S2_vs_ZH6_S2	--	PREDICTED: 3-ketoacyl-CoA synthase 4-like [Cicer arietinum]	0.283427	2.16843	1.40951	1.13483	0.13908	0.454141	0.73026	0.765903
arahy.8Z8BZM	ZH16_S1_vs_ZH6_S1	--	thylakoid lumenal 15.0 kDa protein	5.52119	1.62003	0.544315	0.256387	0.38924	0.917172	1.00933	0.396017
arahy.7CU32D	ZH16_S4_vs_ZH6_S4	--	subtilisin-like serine protease 2	0.865815	1546.22	551.795	43.4853	1.13213	1973.45	359.638	16.1819
arahy.5R858N	ZH16_S3_vs_ZH6_S3	--	Sugar transporter SWEET n=3 Tax=Phaseoleae RepID=C6TC24_SOYBN	471.572	4.79606	11.8935	1.66147	459.834	4.69385	4.52619	2.58941
arahy.X3Z0KH	ZH16_S1_vs_ZH6_S1	--	pollen Ole e I family allergens	8.09203	3.26357	2.20215	1.31842	3.15844	4.1232	2.35437	1.38167
Novel02209	ZH16_S1_vs_ZH6_S1	--	Glutamine dumper 4, putative [Theobroma cacao]>gi|508782009|gb|EOY29265.1| Glutamine dumper 4, putative [Theobroma cacao]	15.0826	2.62954	3.05446	1.35738	1.38167	3.09378	2.62036	0.851223
arahy.B9PCCI	ZH16_S4_vs_ZH6_S4	--	DEAD-box ATP-dependent RNA helicase	2.01265	2.86414	3.60084	4.91527	0.737088	1.11889	1.06595	0.220046
arahy.J9LUB0	ZH16_S2_vs_ZH6_S2	--	Cation efflux family protein	0.68546	10.3908	0.387916	0.165604	1.20082	1.18021	0.632782	0.102255
arahy.QL50AS	ZH16_S4_vs_ZH6_S4	--	Acyl-CoA thioesterase family protein	0.187723	22.3154	5.9586	9.9202	1.03727	8.97731	5.14976	0
arahy.H7MN3L	ZH16_S4_vs_ZH6_S4	--	nucleobase-ascorbate transporter-like protein	6.30854	40.1425	18.9754	34.8219	4.69301	29.3931	16.005	15.8064
Novel00662	ZH16_S2_vs_ZH6_S2	--	hypothetical protein ARAX_ADH51I17-83F22-001 [Arachis duranensis]	0.801223	6.69221	0.667988	0.381531	0.398038	1.98061	0.508638	0.167533
arahy.T63ME6	ZH16_S2_vs_ZH6_S2	--	transmembrane protein, putative	0.892001	2.85161	1.27722	3.67599	0.0903243	0	0	0
arahy.KE7GSG	ZH16_S3_vs_ZH6_S3	--	sodium hydrogen exchanger 2	0.945967	1.76326	2.1977	1.12821	1.42071	1.07654	0.478968	0.731749
arahy.GLBC47	ZH16_S2_vs_ZH6_S2	--	serine carboxypeptidase-like 22	2.18659	14.7675	0.0676981	0	1.33743	3.09762	0.285168	0
arahy.85L7WZ	ZH16_S1_vs_ZH6_S1	--	caleosin-related family protein	3.25587	12.5464	4.6319	4.49092	1.09209	12.5788	6.13973	3.60052
arahy.GF4SN5	ZH16_S3_vs_ZH6_S3	--	D-arabinono-1,4-lactone oxidase family protein	4.54021	0.467481	0.741237	0.507498	7.81761	0.763088	0.180255	0.17228
arahy.3TM8QD	ZH16_S2_vs_ZH6_S2	--	uncharacterized protein LOC102661958 [Glycine max]	111.992	4.11298	1.68232	3.18624	72.2419	0.886793	1.84206	1.34518
arahy.UKG827	;ZH16_S2_vs_ZH6_S2	--	nodulin MtN21 /EamA-like transporter family protein	2.55033	8.93921	1.26878	0.571081	7.92378	4.11092	1.66264	0.66487
Novel04309	ZH16_S1_vs_ZH6_S1	--	Myosin-like protein [Medicago truncatula]>gi|355481786|gb|AES62989.1| P-loop nucleoside triphosphate hydrolase superfamily protein [Medicago truncatula]	1.48817	0.991553	1.88108	1.17355	0.0325022	0.158346	0.0440104	0.306423
arahy.IX1GIK	;ZH16_S2_vs_ZH6_S2	--	CTP synthase family protein	19.7102	66.7971	17.1334	7.42322	52.7729	24.2544	14.3665	4.05988
arahy.8837KU	ZH16_S2_vs_ZH6_S2	--	protein MEI2-like 2-like isoform X1 [Glycine max]	4.93035	99.5247	23.9402	30.2674	4.4327	34.8304	18.6252	14.4971
arahy.NBN23J	ZH16_S1_vs_ZH6_S1	--	cationic amino acid transporter 2	20.5162	0.76858	1.73763	1.02436	7.27096	0.484413	0.975928	1.0015
Novel04454	ZH16_S2_vs_ZH6_S2	--	--	0	4.48173	2.50767	1.27849	0	0.680326	0.392767	0.288512
Novel04397	ZH16_S1_vs_ZH6_S1	--	--	3.29194	9.90472	2.8961	4.41121	0	0.116649	0	0
arahy.TTFN2L	ZH16_S3_vs_ZH6_S3	--	uncharacterized protein LOC100783150 isoform X1 [Glycine max]	3.55346	37.9593	13.9581	3.7688	3.75988	18.7761	5.79638	1.90635
arahy.J82XS7	ZH16_S2_vs_ZH6_S2	--	F-box protein interaction domain protein	0.0251962	1.94232	0.37672	0.576509	0.0418383	0.0356053	0.881018	0.0378912
arahy.0G1U1N	ZH16_S2_vs_ZH6_S2	--	glutamine dumper 3	85.1433	239.965	142.701	80.8916	66.9128	96.1509	100.908	76.0459
arahy.71PNNN	ZH16_S1_vs_ZH6_S1	--	prephenate dehydrogenase family protein	8.32627	5.70698	3.22855	2.71812	4.04494	6.44507	3.10056	2.95407
arahy.VJ83GC	ZH16_S1_vs_ZH6_S1	--	nodulin MtN21 /EamA-like transporter family protein	28.7662	0.555097	0.0476005	0	8.24814	0.389026	0	0.0455565
arahy.AMCT3P	ZH16_S2_vs_ZH6_S2	--	methionine sulfoxide reductase B 2	0.202154	4.30335	0.438916	1.57204	0	0.0756923	0.0610959	0.0556139
arahy.C8BSPY	ZH16_S1_vs_ZH6_S1	--	putative protein TPRXL-like isoform X2 [Glycine max]	4.43071	4.75477	1.09723	0.800049	0.398964	2.42701	0.876045	0.225237
arahy.W0GCEN	ZH16_S4_vs_ZH6_S4	--	NADH-ubiquinone oxidoreductase chain 4 n=7 Tax=Medicago RepID=D4HNF2_9FABA	7.83234	26.7986	22.8403	27.0392	4.57893	7.54362	7.12685	3.49821
arahy.PUJ5T2	ZH16_S2_vs_ZH6_S2	--	agenet domain-containing protein / bromo-adjacent homology (BAH) domain-containing protein	0.289726	17.8009	3.01102	1.56853	0.395892	7.6818	5.29836	3.05403
arahy.D7N80J	ZH16_S2_vs_ZH6_S2	--	histone H2A 11	6.2878	104.83	20.7552	17.8221	9.27506	47.1761	21.9469	14.8238
arahy.GLW41G	;ZH16_S4_vs_ZH6_S4	--	subtilisin-like serine protease 2	1.49705	2815.47	365.279	27.1271	4.27062	3598.81	514.408	3.85687
arahy.I7CGDJ	ZH16_S1_vs_ZH6_S1	--	D-ribulose-5-phosphate-3-epimerase	4.60849	1.57703	1.54339	0.930507	1.63219	0.936661	2.16168	1.22575
arahy.76IQRR	ZH16_S3_vs_ZH6_S3	--	malate dehydrogenase	20.6236	35.9198	33.1311	21.5314	12.6308	29.4259	17.0657	10.669
arahy.246C9P	ZH16_S2_vs_ZH6_S2	--	thylakoid membrane phosphoprotein 14 kDa protein	0.246223	16.524	0.514923	0.150465	0.502948	1.00958	1.02617	0.665454
arahy.91ADXD	ZH16_S1_vs_ZH6_S1	--	alpha dioxygenase	6.52553	0.256641	2.56481	1.02121	0.549222	0.309233	1.01808	0.205951
arahy.32M4WS	ZH16_S2_vs_ZH6_S2	--	golgi-to-ER traffic-like protein	0.604334	2.23888	0.136493	0.169822	0.441338	0.191175	0.208288	0.0669525
arahy.R869CP	ZH16_S4_vs_ZH6_S4	--	beta-xylosidase 1	311.009	4.86259	4.70761	8.33522	391.057	7.27431	4.67455	3.92293
arahy.A3CFJS	ZH16_S4_vs_ZH6_S4	--	IAA-amino acid hydrolase ILR1-like protein	13.5348	22.4243	16.2073	9.40915	10.2694	40.4623	12.2483	4.50156
arahy.QQ4CTH	ZH16_S4_vs_ZH6_S4	--	Unknown protein	0.110427	196.563	98.5563	137.846	0.155924	111.222	83.8876	27.6478
arahy.DB2P39	ZH16_S1_vs_ZH6_S1	--	ATP-citrate synthase (ATP-citrate (Pro-S-)-lyase) n=2 Tax=Nautiliaceae RepID=B9L917_NAUPA	16.2541	10.403	1.21332	0.517091	7.42735	7.432	1.86335	0.362914
arahy.76SLUU	;ZH16_S4_vs_ZH6_S4	--	mannan endo-1,4-beta-mannosidase 4-like [Glycine max]	0.809071	0.104151	8.2831	14.9693	6.82041	0.088655	4.99439	4.80351
arahy.K5TUWL	ZH16_S2_vs_ZH6_S2	--	probable polygalacturonase-like [Glycine max]	10.8184	27.1436	12.5662	14.5888	5.73169	12.8656	10.9267	12.2417
arahy.V2AQ6U	ZH16_S2_vs_ZH6_S2	--	putative cyclin-D6-1-like [Glycine max]	0.155249	20.9738	0.226771	0.259916	0.0776994	5.78317	0.717076	0.167374
arahy.IK60LM	;ZH16_S4_vs_ZH6_S4	--	NAD(P)-binding Rossmann-fold superfamily protein	0.0411801	85.2901	22.4432	3.68673	0.356112	85.7998	21.7242	0.767008
arahy.TD68IP	ZH16_S1_vs_ZH6_S1	--	ADP-ribosylation factor GTPase-activating protein AGD3-like [Glycine max]	3.20063	10.3567	3.00463	2.33298	0.692809	3.14284	0.906093	0.666714
arahy.3I6GZV	ZH16_S2_vs_ZH6_S2	--	BURP domain-containing protein	0.0281373	1.14691	1.17948	2.55663	0.076279	0.0657955	4.04401	6.10418
arahy.K5ZE2Z	ZH16_S2_vs_ZH6_S2	--	fructose-bisphosphate aldolase 1	0.393145	7.29057	1.57242	0.0783431	0.392939	0.363927	0	0
arahy.V5GRUW	ZH16_S2_vs_ZH6_S2	--	Unknown protein	2.79592	6.36528	2.17362	1.62178	0.650202	0.075525	0.240116	0
arahy.EDFF2E	ZH16_S1_vs_ZH6_S1	--	uncharacterized protein LOC100792354 isoform X1 [Glycine max]	1.55904	0.45768	0.400257	0.674458	0.664978	0.32949	0.338835	0.701926
arahy.QV02Z8	ZH16_S1_vs_ZH6_S1	--	gibberellin 20 oxidase 2-like [Glycine max]	2.51837	1.25561	0.846226	0.965163	0.953592	1.77577	1.09284	1.17944
arahy.BQ15Q3	ZH16_S3_vs_ZH6_S3	--	NBS-LRR disease resistance protein	0.591946	0.104851	0.642795	0	1.74867	0.248097	0.0121895	0
arahy.L9U4X5	ZH16_S2_vs_ZH6_S2	GeBP	DNA-binding storekeeper protein-related transcriptional regulator	3.37957	13.7207	9.48714	0.179379	5.84134	0.656689	1.93727	0.934981
Novel04663	ZH16_S3_vs_ZH6_S3	--	PREDICTED: uncharacterized protein LOC104109606 [Nicotiana tomentosiformis]	0.156634	1.08362	4.61289	1.2592	0.0423752	0.250661	0	0.110677
Novel01260	ZH16_S2_vs_ZH6_S2	--	--	29.996	20.952	0	0	18.5082	6.87073	1.17719	0
arahy.E110XT	ZH16_S1_vs_ZH6_S1	--	Glycerophosphodiester phosphodiesterase GDE1 n=2 Tax=Triticeae RepID=M8BLH1_AEGTA	8.05596	0.490654	0.223031	0.0925055	1.22788	0.303187	0.0630059	0
arahy.E8D24U	ZH16_S1_vs_ZH6_S1	--	Mitochondrial substrate carrier family protein	11.8741	4.9242	1.21356	0.552368	5.58982	4.18306	1.41153	0.356576
arahy.70S30W	ZH16_S3_vs_ZH6_S3	--	cellulose synthase 1	171.391	3.28783	3.39806	2.76635	135.397	3.77632	1.64993	1.36346
arahy.IXF0I4	ZH16_S1_vs_ZH6_S1	--	Protein kinase superfamily protein	8.80534	9.11919	21.8328	17.3941	4.2723	7.00681	17.1316	13.7744
Novel04779	ZH16_S4_vs_ZH6_S4	--	--	9.21375	16.9484	23.3806	33.7685	10.8036	30.5364	15.1694	5.42671
Novel03748	ZH16_S2_vs_ZH6_S2	--	--	0.113708	4.41993	0.669668	1.53775	0.0523387	0.439258	0.355432	0.16724
arahy.9B1DGQ	ZH16_S1_vs_ZH6_S1	--	ATP binding	0.619464	0.278171	0.139355	0.104355	0.150312	0.103445	0.0264848	0.0534306
arahy.X9QMY1	ZH16_S1_vs_ZH6_S1	--	GDSL-like Lipase/Acylhydrolase superfamily protein	1.22806	9.58321	8.57862	3.10024	0.568273	12.9602	7.46545	2.9317
arahy.GW0D9K	ZH16_S2_vs_ZH6_S2	SBP	squamosa promoter binding protein-like 3	41.813	56.9022	0.219299	0	30.2141	26.2898	4.0218	0
arahy.8393AT	ZH16_S1_vs_ZH6_S1	--	ATP-binding ABC transporter	1.13641	7.21657	1.31029	0.844012	0.398316	6.70595	1.35152	0.750616
arahy.C6ELU8	ZH16_S1_vs_ZH6_S1	--	Galactosyltransferase family protein	2.53432	6.03489	2.28046	1.7502	1.20852	4.05487	2.1831	2.05101
arahy.T4K93Z	ZH16_S3_vs_ZH6_S3	--	camphor resistance CrcB family protein	0.333264	1.22833	0.891467	1.01276	0.331772	0.400046	0.165506	0.147157
arahy.QC4UQW	ZH16_S3_vs_ZH6_S3	--	Cell wall protein-like n=3 Tax=Oryza RepID=Q8H3Y9_ORYSJ	12.3606	4.12401	4.59751	1.26367	13.9755	4.77651	2.13994	1.07084
Novel03633	ZH16_S4_vs_ZH6_S4	--	hypothetical protein MTR_1g087990 [Medicago truncatula]>gi|357442439|ref|XP_003591497.1| hypothetical protein MTR_1g088210 [Medicago truncatula]>gi|355480527|gb|AES61730.1| leguminosin group486 secreted peptide [Medicago truncatula]>gi|355480545|gb|AES61748.1| leguminosin group486 secreted peptide [Medicago truncatula]	0	82.3832	5.40708	3.42454	0	59.7812	10.7354	0.398546
arahy.0BDN0G	ZH16_S1_vs_ZH6_S1	--	Alba DNA/RNA-binding protein	2.18612	0.402731	0.27235	0.147125	0.24156	0.914079	0.832126	0.334291
arahy.UC0Y85	ZH16_S2_vs_ZH6_S2	--	L-ascorbate oxidase homolog [Glycine max]	15.2848	12.9736	2.08589	1.72394	16.1265	5.77992	1.82767	2.09606
Novel04354	ZH16_S2_vs_ZH6_S2	TF	PREDICTED: probable WRKY transcription factor 2 isoform X1 [Cicer arietinum]	0.112342	1.54957	0.230158	0.0823588	0.123675	0	0	0
arahy.2T22I7	ZH16_S1_vs_ZH6_S1	--	Ankyrin repeat family protein	14.2236	1.54475	0.94919	0.792616	1.64504	7.32357	4.82316	0.300841
arahy.ICNT54	ZH16_S3_vs_ZH6_S3	--	UDP-Glycosyltransferase superfamily protein	2.97298	0.476079	3.52024	1.32048	3.74842	0.947023	0.84185	0.232556
arahy.8PZ45R	ZH16_S2_vs_ZH6_S2	--	Protein kinase family protein	10.3138	6.07613	1.20769	0.894902	17.8071	0.598197	3.55599	0.32846
arahy.L7SRZY	ZH16_S2_vs_ZH6_S2	TF	MADS-box transcription factor 6 [Glycine max]	4.87861	26.8948	8.30467	8.93508	1.66526	5.1212	5.43585	7.68571
arahy.YX70Z8	ZH16_S2_vs_ZH6_S2	--	Nucleotide/sugar transporter family protein	1.17821	3.02528	0.667561	0.265387	0.712809	0.96253	0.979672	0.748059
arahy.PF1JUH	ZH16_S2_vs_ZH6_S2	--	Raffinose synthase family protein	0	0.314749	0.1369	1.03572	0.0514535	0.0100564	0.388902	1.9829
arahy.66GSL1	ZH16_S2_vs_ZH6_S2	--	Unknown protein	0.130867	1.53884	0.167285	0.744262	0.0247336	0.0149199	0.0518607	0
arahy.0UKE5Q	;ZH16_S2_vs_ZH6_S2	--	CTP synthase family protein	21.6204	145.005	45.5805	19.4807	76.6795	43.9508	32.2644	18.4205
Novel01185	ZH16_S2_vs_ZH6_S2	--	--	0.0176049	6.98095	0.569992	1.95877	0.0405321	0.457549	0.150013	0.349178
arahy.Z98SD8	ZH16_S1_vs_ZH6_S1	--	Transmembrane amino acid transporter family protein	8.54462	3.32085	8.1346	8.40033	3.8024	2.95706	8.11645	11.9977
Novel02111	ZH16_S3_vs_ZH6_S3	--	--	1.40961	3.98577	2.17376	1.17077	1.52411	2.3323	0.604966	0.459427
arahy.36MNWU	;ZH16_S4_vs_ZH6_S4	--	cinnamoyl coa reductase 1	70.5631	4.95315	25.7675	26.6375	61.9229	12.5239	15.9708	10.0996
arahy.F4981M	;ZH16_S3_vs_ZH6_S3	--	BTB/POZ domain-containing protein [Glycine max]	2.80421	10.5987	3.91836	0.969518	5.63792	7.6173	1.74846	0.317281
arahy.46R0UG	ZH16_S2_vs_ZH6_S2	--	bromodomain and WD repeat-containing protein 3-like isoform X5 [Glycine max]	4.61429	13.79	3.61396	4.49735	3.13603	3.59397	2.49616	1.57132
arahy.T87YCG	ZH16_S2_vs_ZH6_S2	--	Cellulase (glycosyl hydrolase family 5) protein	3.26861	120.803	0.253081	0	2.92466	37.903	4.96045	0.167079
arahy.S298XJ	ZH16_S2_vs_ZH6_S2	--	Unknown protein	0.119577	10.1507	3.06863	1.82925	0.569945	1.00621	0.646138	0.383366
arahy.V9UCIZ	;ZH16_S3_vs_ZH6_S3	--	seed linoleate 9S-lipoxygenase	133.28	1.72066	3.17886	1.22466	343.195	2.21031	1.35541	1.98789
arahy.XG9Q6Z	ZH16_S3_vs_ZH6_S3	--	Protein kinase superfamily protein	69.0273	11.3258	40.2962	11.4868	54.5248	18.6502	10.8252	10.1469
arahy.L6JJW9	ZH16_S3_vs_ZH6_S3	--	Transducin/WD40 repeat-like superfamily protein	0.0486301	0.303819	4.0568	1.46368	0.0447848	0.464178	0.848945	0.21111
arahy.C4BN37	ZH16_S1_vs_ZH6_S1	--	histone-lysine N-methyltransferase SUVR2-like isoform X1 [Glycine max]	3.0375	3.73681	1.45656	1.44297	1.41555	3.49249	1.53128	1.66585
arahy.PYC5G6	ZH16_S1_vs_ZH6_S1	--	disease resistance protein (TIR-NBS-LRR class), putative	0.828032	0.982195	0.40383	0.444828	0.292138	0.782748	0.393105	0.401295
arahy.53XZTF	ZH16_S3_vs_ZH6_S3	--	Pyruvate kinase family protein	11.4164	12.9158	60.9376	39.0087	9.81766	19.1911	29.2939	21.8965
arahy.83WUCG	ZH16_S2_vs_ZH6_S2	--	Pentatricopeptide repeat (PPR) superfamily protein	0.764072	4.23788	2.19715	1.95099	0.259043	1.06992	0.697134	1.09988
arahy.UY8X5C	ZH16_S4_vs_ZH6_S4	--	probable galacturonosyltransferase 15-like [Glycine max]	3.04242	9.6932	4.69694	3.25447	1.65648	9.59477	2.46419	0.674806
arahy.10MYPD	ZH16_S3_vs_ZH6_S3	--	cytochrome P450, family 88, subfamily A, polypeptide 3	3.37173	8.84739	27.2581	12.4724	2.39487	9.31784	13.0328	17.3864
arahy.R8XGJB	ZH16_S2_vs_ZH6_S2	--	Double Clp-N motif-containing P-loop nucleoside triphosphate hydrolases superfamily protein	3.77724	0.863222	0.289463	0.0709483	2.84015	0.214958	0.0527699	0.119658
arahy.G84J1P	ZH16_S1_vs_ZH6_S1	--	uncharacterized protein LOC100781575 [Glycine max]	5.70237	0.226927	0.0446255	0.0597374	1.74359	0.4187	0.0860129	0
Novel00835	ZH16_S3_vs_ZH6_S3	--	unknown [Arachis hypogaea]	0.66341	0.716467	24.7567	48.6612	0.208875	0.571726	7.64161	28.7784
arahy.UX1VFS	;ZH16_S3_vs_ZH6_S3	--	S12-like, 30S ribosomal protein S12 subfamily protein	31.2425	0	1.43443	16.5151	20.9989	2.37103	0	2.28345
arahy.LSX38T	ZH16_S1_vs_ZH6_S1	--	receptor-like kinase	3.67145	1.21053	0.637727	0.365309	1.71836	1.07436	0.631886	0.499635
Novel00872	ZH16_S2_vs_ZH6_S2	--	PREDICTED: uncharacterized protein LOC102600268 [Solanum tuberosum]	3.40844	9.93753	2.22065	3.35304	2.19044	2.88992	1.5228	0.826343
Novel04684	ZH16_S3_vs_ZH6_S3	--	--	0	0	6.05461	10.5598	0	0	2.55818	10.5969
arahy.RJ9TTJ	;ZH16_S4_vs_ZH6_S4	--	senescence-associated carboxylesterase 101-like isoform X1 [Glycine max]	0.578167	0.384279	3.47709	2.92614	4.5918	1.81288	2.17312	1.05581
arahy.GZ9SUQ	ZH16_S2_vs_ZH6_S2	--	ATP-binding ABC transporter	3.28856	3.63285	0.112327	0.0372139	0.789995	0.278792	0.401884	0.013303
arahy.G7F5HX	ZH16_S3_vs_ZH6_S3	--	beta-xylosidase 2	0.292463	0.326594	5.02166	2.1122	1.03362	0.741662	1.28503	0.941696
arahy.7V6HRB	;ZH16_S4_vs_ZH6_S4	--	Unknown protein	0	219.643	11.9472	17.7064	0	260.639	47.2391	3.30422
arahy.DA0PX7	ZH16_S2_vs_ZH6_S2	--	sulfate transporter 1	5.99935	1.39614	0.0878377	0.045233	4.77505	0.488148	0.102224	0.10815
arahy.H6FGN8	ZH16_S2_vs_ZH6_S2	--	alpha/beta hydrolase domain-containing protein 13-like [Glycine max]	6.05664	46.1816	8.50031	23.9244	2.63249	12.9399	10.471	18.7979
arahy.LB9ANX	ZH16_S1_vs_ZH6_S1	--	uncharacterized protein LOC100810744 isoform X1 [Glycine max]	1.6745	5.91217	2.50974	1.23668	0.66047	4.56469	1.73792	1.12394
arahy.TP5BL7	ZH16_S4_vs_ZH6_S4	--	beta-amylase 1	74.0446	32.6338	20.1824	8.38486	131.763	58.4711	17.4045	3.54535
arahy.6CD4KH	;ZH16_S4_vs_ZH6_S4	--	sugar transport protein 5-like [Glycine max]	0	3.31416	5.23921	1.79062	0.613395	9.69872	2.07921	0.0928023
arahy.68PBWJ	ZH16_S3_vs_ZH6_S3	--	beta-amylase 3	5.26748	12.9469	7.44463	5.19783	6.91947	10.3289	3.20083	3.60484
arahy.0KM5ZJ	ZH16_S3_vs_ZH6_S3	--	Unknown protein	0.989699	1.074	2.3518	3.25304	0.158315	0.189669	0	0.237337
arahy.6187DS	ZH16_S3_vs_ZH6_S3	TF	transcription factor MYC2-like [Glycine max]	24.9959	3.1612	9.76269	6.91521	19.8624	4.842	4.87514	3.99261
arahy.IAPX52	ZH16_S3_vs_ZH6_S3	--	UDP-glycosyltransferase 74 F1	13.8941	10.5452	14.5205	5.23428	18.2211	12.0097	6.11512	3.32354
arahy.CN8H2Q	ZH16_S1_vs_ZH6_S1	--	protein IQ-DOMAIN 14-like [Glycine max]	1.98106	2.99509	1.14307	0.748361	0.649946	3.11221	1.893	0.482902
arahy.G0M71R	ZH16_S3_vs_ZH6_S3	--	transmembrane protein, putative	8.93754	2.10141	2.56488	1.1918	8.07564	3.32432	1.1897	1.44338
arahy.14L1JV	ZH16_S2_vs_ZH6_S2	--	heterogeneous nuclear ribonucleoprotein U-like protein 1-like isoform X1 [Glycine max]	2.66435	2.11096	1.35504	0.967369	3.16589	0.287288	1.01013	0.481972
arahy.15VHUH	ZH16_S3_vs_ZH6_S3	--	disease resistance protein	1.54185	0.718283	0.585204	0.273473	1.25189	0.401872	0.16772	0.193666
arahy.WTIT2S	ZH16_S1_vs_ZH6_S1	--	choline kinase 1	17.7486	1.54049	2.5742	3.40462	8.66763	1.76062	5.64168	4.58359
arahy.D9GYCT	ZH16_S1_vs_ZH6_S1	--	P-loop containing nucleoside triphosphate hydrolases superfamily protein	3.03899	5.86693	2.26887	1.71875	1.14895	4.83944	2.8571	1.32337
arahy.ZJ3KD6	ZH16_S1_vs_ZH6_S1	TF	myb family transcription factor APL-like isoform X1 [Glycine max]	1.17209	4.46458	0.206408	0.304691	0.243275	3.36876	0.49068	0.835036
arahy.9PNN5C	ZH16_S2_vs_ZH6_S2	--	Unknown protein	1.44081	14.5719	5.32345	6.56549	1.15327	5.05233	5.77249	4.09977
arahy.C29STI	ZH16_S1_vs_ZH6_S1	--	disease resistance protein	2.07218	1.41384	0.36187	0.325305	0.610814	0.796988	0.323019	0.319825
Novel04325	ZH16_S2_vs_ZH6_S2	--	--	0	196.82	0.146456	0	0	38.6682	5.14905	0
arahy.SZG1V2	ZH16_S1_vs_ZH6_S1	--	prephenate dehydrogenase family protein	15.4697	3.57202	1.55471	1.2193	6.40031	3.15343	1.38151	0.964272
arahy.0FI6RG	ZH16_S4_vs_ZH6_S4	--	chalcone synthase [Glycine max]	0.842211	179.892	160.329	45.4436	1.88288	296.052	104.921	16.0599
arahy.P2T0JM	ZH16_S1_vs_ZH6_S1	--	Unknown protein	20.3066	5.7078	4.37246	4.53985	7.61689	4.32669	3.90213	3.44862
arahy.U846X0	ZH16_S3_vs_ZH6_S3	--	S-adenosyl-L-homocysteine hydrolase	9.52581	1.39983	9.10011	0.798385	5.49696	3.26797	1.56746	0.130376
arahy.5G37N1	ZH16_S1_vs_ZH6_S1	--	ubiquitin C-terminal hydrolase 3	10.484	14.0764	4.84235	7.37444	2.64231	3.64376	0.903308	1.4368
arahy.016HCI	ZH16_S3_vs_ZH6_S3	--	uncharacterized protein LOC100789033 [Glycine max]	81.4326	12.2327	48.8107	10.2146	135.221	23.6355	20.2111	4.44483
arahy.T1J2UZ	ZH16_S4_vs_ZH6_S4	--	isoflavone reductase-like protein-like [Glycine max]	0.181587	121.244	20.3255	2.52237	0.127825	146.683	23.4021	0.710517
arahy.31DYP6	ZH16_S4_vs_ZH6_S4	CSD	Pathogenesis-related thaumatin superfamily protein	1.31514	0.35612	0.331156	1.62236	1.5023	0.345625	0.379615	0.0797469
arahy.NWI6KJ	ZH16_S1_vs_ZH6_S1	--	Vacuolar protein-sorting protein BRO1 n=2 Tax=Cordycipitaceae RepID=G3J880_CORMM	0.797283	2.83726	0.632838	0.230973	0.280273	2.70334	0.54847	0.206367
arahy.WJL4H1	ZH16_S2_vs_ZH6_S2	--	cyclic nucleotide gated channel 19	0.777493	5.13381	3.23626	3.40673	0.682043	2.03079	1.41507	1.28212
arahy.E0CBZR	ZH16_S1_vs_ZH6_S1	--	organic cation/carnitine transporter 2	8.59713	0.9644	1.75014	2.05255	3.88732	0.849125	1.20884	1.05556
arahy.ELA92E	ZH16_S2_vs_ZH6_S2	--	uncharacterized protein LOC102663212 [Glycine max]	3.18588	3.95052	0.145129	0	3.55774	1.25512	0.513606	0.0492146
arahy.W14UHG	ZH16_S2_vs_ZH6_S2	--	Unknown protein	0.707138	5.57144	3.10814	3.79878	0.406633	2.32015	1.54348	3.22699
arahy.B1753N	ZH16_S3_vs_ZH6_S3	--	trehalose-6-phosphate phosphatase	8.14351	10.8926	6.66201	0.904029	4.79664	7.37902	2.84767	0.610825
arahy.YQ5H8C	ZH16_S2_vs_ZH6_S2	--	Protein kinase superfamily protein	3.52367	17.5937	3.52713	1.68068	3.2373	8.38038	3.8213	1.64114
arahy.6GN5UX	ZH16_S1_vs_ZH6_S1	--	peptidyl-prolyl cis-trans isomerases	15.1488	12.6589	6.4615	6.20697	6.90691	8.03439	4.84537	5.60875
arahy.GTL81D	ZH16_S1_vs_ZH6_S1	--	mannan endo-1,4-beta-mannosidase 6-like [Glycine max]	5.3603	0.87899	0.0675582	0.135684	0.803113	0.181859	0.0798113	0
Novel00521	ZH16_S3_vs_ZH6_S3	--	PREDICTED: lipoamide acyltransferase component of branched-chain alpha-keto acid dehydrogenase complex, mitochondrial isoform X2 [Cicer arietinum]	0.100204	0.548886	3.39217	2.10406	0.185806	0.691187	1.35799	0.922241
Novel04093	ZH16_S4_vs_ZH6_S4	--	PREDICTED: uncharacterized protein LOC104214157, partial [Nicotiana sylvestris]	4.26045	19.8713	30.0323	71.8	1.91997	11.6041	16.6324	16.355
Novel03496	ZH16_S2_vs_ZH6_S2	--	PREDICTED: two-component response regulator ARR14-like [Cicer arietinum]	0.488251	1.27284	0.672262	0.671581	0.122668	0.0254837	0.0332205	0
arahy.A4T9L9	ZH16_S4_vs_ZH6_S4	--	glyoxal oxidase-related protein	0.780291	46.0938	25.2972	17.4902	0.890847	61.6965	18.287	7.26065
arahy.RM3VXC	ZH16_S3_vs_ZH6_S3	TF	myb transcription factor	5.42037	1.02614	2.00801	1.98956	3.06827	0.845204	0.593193	0.651923
arahy.S7A2EF	ZH16_S1_vs_ZH6_S1	--	cytokinin oxidase/dehydrogenase 1	43.7015	5.35178	0.354253	0.0511043	21.0313	5.72159	0.796651	0.0608385
arahy.UA1VTY	ZH16_S2_vs_ZH6_S2	SET	histone-lysine N-methyltransferase SUVR2-like isoform X1 [Glycine max]	0.318773	5.35409	2.33393	1.40223	0.113484	2.36244	2.72619	1.70523
Novel01188	ZH16_S1_vs_ZH6_S1	--	PREDICTED: thymocyte nuclear protein 1 [Pyrus x bretschneideri]	8.63027	4.71821	4.02074	2.6816	1.12461	2.28823	0.91908	0.761508
Novel01446	ZH16_S1_vs_ZH6_S1	--	--	4.45167	0.772317	0.851487	1.01605	0.454809	0.227226	0.365973	0
arahy.QT2X3H	ZH16_S1_vs_ZH6_S1	--	reticulon-4-interacting protein 1 homolog, mitochondrial-like isoform X5 [Glycine max]	12.7769	0	0.132732	1.44045	0.0515312	0	0	0
Novel01486	ZH16_S1_vs_ZH6_S1	--	hypothetical protein 205D04_9 [Arachis hypogaea]	5.68312	3.24476	1.63169	1.88372	2.69384	1.77876	0.940784	1.23335
arahy.II6FYR	ZH16_S3_vs_ZH6_S3	--	BAG family molecular chaperone regulator 6-like [Glycine max]	0.20004	17.5119	10.506	3.01154	0.243133	9.3781	3.86024	3.47854
arahy.ARVN7W	ZH16_S3_vs_ZH6_S3	TF	ethylene-responsive transcription factor 1B	0	0.174575	1.15701	0.560194	0.0180244	0.0417524	0	0.0810635
arahy.W2ETIH	ZH16_S3_vs_ZH6_S3	--	monomeric form sarcosine oxidase	13.6219	2.06213	13.7699	7.32267	9.45138	3.18527	5.21982	4.38077
arahy.PA7RNP	ZH16_S3_vs_ZH6_S3	--	putative ribonuclease H protein At1g65750-like [Glycine max]	1.58006	2.58602	3.43674	2.44899	2.3513	3.0642	1.65745	1.38023
arahy.BXF2YD	ZH16_S2_vs_ZH6_S2	--	receptor-like protein kinase 2	0.0572948	0.825859	0.181895	0.0435648	0.0485599	0.03492	0	0
arahy.6A3U8Z	ZH16_S4_vs_ZH6_S4	--	receptor-like kinase	0.38237	13.7152	2.40882	7.15427	0.18915	3.72874	1.40868	0
arahy.7U9J2V	ZH16_S2_vs_ZH6_S2	--	uncharacterized protein LOC102663671 isoform X5 [Glycine max]	6.92674	49.3095	4.31143	21.8858	2.68185	10.6975	5.38269	13.2208
Novel02626	ZH16_S2_vs_ZH6_S2	--	--	0.126656	3.17271	0.609718	0.732365	0.0911819	0.690988	0.634552	0.450502
arahy.VDH4YT	ZH16_S2_vs_ZH6_S2	--	GASA/GAST/Snakin	199.39	9.56416	0.860542	1.73538	30.3183	0.170201	0.310693	0.21351
Novel01754	;ZH16_S3_vs_ZH6_S3	GRAS	PREDICTED: scarecrow-like protein 21 [Cicer arietinum]	3.43367	1.39388	14.0044	3.52371	9.30282	2.02154	4.97701	2.58487
arahy.S2H83J	ZH16_S2_vs_ZH6_S2	--	uncharacterized protein LOC100795947 isoform X1 [Glycine max]	2.99709	4.88197	1.66384	1.20721	4.47559	2.06815	1.69466	1.39153
Novel00554	ZH16_S1_vs_ZH6_S1	--	PREDICTED: acyl-CoA-binding domain-containing protein 4-like isoform X1 [Glycine max]	13.7345	26.7217	13.2716	15.1536	6.87546	13.3204	12.0202	10.0832
Novel01910	ZH16_S2_vs_ZH6_S2	--	hypothetical protein CICLE_v10026935mg [Citrus clementina]>gi|557529901|gb|ESR41151.1| hypothetical protein CICLE_v10026935mg [Citrus clementina]	1.00613	145.527	63.2255	78.4405	2.47922	37.1387	60.0217	97.4601
arahy.YSN9W3	;ZH16_S4_vs_ZH6_S4	TF	ethylene-responsive transcription factor 3 [Glycine max]	16.9256	0.570533	1.98916	1.68881	35.2671	0.777568	1.19322	0.258585
Novel03594	ZH16_S2_vs_ZH6_S2	--	--	4.51672	18.616	7.40635	4.52571	4.49617	5.96794	6.29465	4.20828
arahy.RVP2E0	ZH16_S3_vs_ZH6_S3	--	GDSL-like Lipase/Acylhydrolase superfamily protein	16.1142	0.335119	0.558513	0.414935	10.6685	0.420936	0	0.170348
arahy.6A53IY	ZH16_S2_vs_ZH6_S2	--	Cellulase (glycosyl hydrolase family 5) protein	2.11555	1402.35	53.5612	2.32517	1.30183	633.209	116.72	1.77819
arahy.07YFUR	ZH16_S4_vs_ZH6_S4	--	Unknown protein	0.0712475	0.547734	0.633415	3.57591	0	0.375924	0.0546083	0
arahy.XXTB4R	;ZH16_S4_vs_ZH6_S4	--	oligopeptide transporter 7	2.75312	2.74593	3.56074	1.2791	1.90456	5.5463	1.86536	0.30174
arahy.8AZ6HD	ZH16_S1_vs_ZH6_S1	--	Ribosomal protein L30/L7 family protein	5.96423	10.748	0.956098	0.384672	0.48834	1.63387	0.846318	0.50902
arahy.G7HECD	ZH16_S2_vs_ZH6_S2	--	proteoglycan 4-like isoform X2 [Glycine max]	0.810067	4.33992	0.837676	0.625892	1.57433	0.947238	0.683374	0.381046
arahy.49QGSQ	ZH16_S3_vs_ZH6_S3	--	dihydroflavonol 4-reductase	1.80677	0.758073	3.06308	1.55962	0.977714	0.680514	0.560901	0.550529
arahy.DIVU4S	ZH16_S2_vs_ZH6_S2	--	glutamate receptor 2	18.083	3.44342	1.03769	0.417165	14.3432	1.52072	0.560318	0.173827
arahy.T6ZY4C	ZH16_S2_vs_ZH6_S2	--	metal-nicotianamine transporter YSL1-like isoform X2 [Glycine max]	6.99934	8.7737	0.299041	0.0477117	13.7183	4.09218	0.522624	0.0182983
arahy.XFL0DY	ZH16_S2_vs_ZH6_S2	TF	transcription factor EMB1444-like [Glycine max]	10.4335	119.782	6.82546	4.40577	9.90508	51.2318	12.7236	2.98759
arahy.8WU6DA	ZH16_S3_vs_ZH6_S3	--	Unknown protein	0.247297	2.49021	7.32548	1.29303	0.270214	0.312967	0.182945	0
Novel02720	ZH16_S2_vs_ZH6_S2	--	HGWP repeat containing protein-like protein [Medicago truncatula]	0.483902	4.59663	0.303694	1.8156	0.0748963	0	0	0
arahy.LL0LKQ	ZH16_S1_vs_ZH6_S1	--	Protein of unknown function (DUF1068)	8.2353	8.56675	5.72636	4.19407	3.91355	8.62679	4.31984	3.15506
Novel03918	ZH16_S2_vs_ZH6_S2	--	PREDICTED: transmembrane emp24 domain-containing protein p24beta3-like [Glycine max]>gi|734317068|gb|KHN02550.1| Transmembrane emp24 domain-containing protein A [Glycine soja]	8.39735	16.8072	1.92058	2.48289	5.0392	6.97769	2.18739	1.08387
arahy.438FZB	ZH16_S3_vs_ZH6_S3	TF	MADS-box transcription factor 6 [Glycine max]	16.0762	1.55551	1.87796	1.22274	29.8339	0.657103	0.569589	0.649906
arahy.UY3KLE	ZH16_S3_vs_ZH6_S3	--	receptor-like protein kinase 2	0.0306865	0.0325449	2.70935	1.9579	0.0194025	0.0261214	0.393477	1.42
arahy.X916ZF	ZH16_S3_vs_ZH6_S3	--	3-oxoacyl-[acyl-carrier-protein] synthase I n=7 Tax=rosids RepID=B9H3Z7_POPTR	49.1197	18.3496	66.9766	32.7985	40.2531	27.4054	32.1512	24.9992
arahy.6SU9IG	ZH16_S4_vs_ZH6_S4	--	proline-rich protein 4	1011.89	113.363	52.8585	12.7808	989.452	158.722	35.2018	3.50196
arahy.I0C4BN	ZH16_S1_vs_ZH6_S1	--	uncharacterized protein LOC100305860 [Glycine max]	2.02056	0.309542	1.60064	2.49153	0.42043	0.0429167	2.83493	3.5952
arahy.6Z1DTG	ZH16_S2_vs_ZH6_S2	--	cytokinin oxidase/dehydrogenase 1	0.0368317	168.095	0.272025	0.108608	0.134726	39.5295	4.47792	0.0590416
arahy.2A7ZAY	ZH16_S1_vs_ZH6_S1	GRF	growth-regulating factor 5	1.2144	2.33696	11.7148	12.4684	0.477183	3.84594	11.2164	16.0537
arahy.S4HK2G	ZH16_S3_vs_ZH6_S3	--	DnaJ heat shock amine-terminal domain protein	27.6503	7.44454	9.84585	6.12049	23.5673	8.34407	3.87275	3.72027
arahy.0A2U5U	;ZH16_S3_vs_ZH6_S3	--	uncharacterized protein LOC100789033 [Glycine max]	106.653	11.9151	48.4902	11.2672	209.06	27.2853	20.9173	4.82048
arahy.M4B5E0	ZH16_S3_vs_ZH6_S3	--	Cell wall protein EXP3 n=1 Tax=Mirabilis jalapa RepID=Q84L39_MIRJA	0.195069	0.627295	17.6216	5.08602	0.450698	0.494988	6.68102	6.59609
Novel03776	ZH16_S3_vs_ZH6_S3	--	--	3.46204	1.88612	4.60319	5.40836	0.45503	0	0	0
arahy.UJ0Y8W	ZH16_S3_vs_ZH6_S3	--	DnaJ heat shock amine-terminal domain protein	57.9589	6.38741	13.5696	5.97371	45.7822	7.07798	4.30311	3.10816
arahy.DWWZ6G	ZH16_S1_vs_ZH6_S1	--	phosphoethanolamine N-methyltransferase	109.578	13.1865	10.7187	11.7826	47.1052	9.77329	13.0584	6.99743
arahy.ZVA9BY	ZH16_S3_vs_ZH6_S3	--	Protein kinase superfamily protein	6.9125	4.24636	3.49163	1.8248	5.61965	4.69664	1.35439	1.28496
arahy.T6QC8B	ZH16_S1_vs_ZH6_S1	--	phosphoethanolamine N-methyltransferase	58.4925	9.61264	7.6507	5.37264	28.5692	7.54674	7.43806	3.1434
arahy.IHVZ87	ZH16_S2_vs_ZH6_S2	--	pollen-specific protein SF21 [Glycine max]	9.15075	5.89415	1.44742	1.3644	15.3394	2.41184	1.74891	0.548363
Novel00268	ZH16_S2_vs_ZH6_S2	--	--	0.111895	1.68231	0.141624	0.503796	0	0.0671518	0.0206944	0
arahy.7S2M5S	ZH16_S3_vs_ZH6_S3	--	Flavin-binding monooxygenase family protein	0.038531	0.285305	2.70605	0.650801	0.066159	0.129321	0.737323	0.380175
arahy.HE23UZ	ZH16_S3_vs_ZH6_S3	--	beta galactosidase 1	184.501	2.30033	24.039	23.5924	317.977	1.89184	10.0698	12.5581
arahy.51YLCT	;ZH16_S3_vs_ZH6_S3	--	RING/FYVE/PHD zinc finger superfamily protein	17.4369	1.84632	2.74244	1.46427	36.5513	1.20675	0.689496	0.944405
arahy.F7MRFZ	ZH16_S1_vs_ZH6_S1	--	Transport ATP-binding protein msbA n=1 Tax=Rubrivivax benzoatilyticus JA2 = ATCC BAA-35 RepID=F3LN64_9BURK	0.605971	0.179235	0.327812	0.124085	0.016745	0.703058	0.482801	0.406244
arahy.KJ3KZU	ZH16_S2_vs_ZH6_S2	--	AarF domain kinase	1.48406	6.46653	1.61939	2.22713	1.6862	2.09192	2.05901	2.79754
arahy.TH0EQN	ZH16_S4_vs_ZH6_S4	--	Quinone reductase family protein	24.6926	15.7033	18.4824	13.1644	23.2232	15.4434	9.70955	4.12414
Novel03721	ZH16_S3_vs_ZH6_S3	--	PREDICTED: uncharacterized protein LOC102588505 [Solanum tuberosum]	4.13698	2.6347	3.70112	3.57291	3.02942	1.67181	1.7775	1.93776
arahy.7XD9C1	ZH16_S2_vs_ZH6_S2	TF	bHLH transcription factor	2.03529	16.5116	2.40186	2.38941	1.38333	1.66023	3.18722	2.34619
arahy.CAW15G	ZH16_S3_vs_ZH6_S3	--	Cyclin-dependent kinase inhibitor family protein	43.9919	9.845	16.1367	6.95302	24.1939	6.6212	6.64394	4.13724
arahy.97EWTL	ZH16_S1_vs_ZH6_S1	--	receptor-like kinase 1	7.18276	1.22408	0.319023	0.262891	2.87348	0.522599	0.504758	0.0706912
Novel03267	ZH16_S2_vs_ZH6_S2	--	Tropinone reductase like [Glycine soja]	2.75597	17.0164	6.29913	9.69858	2.07278	6.89344	6.34754	7.64209
Novel02113	ZH16_S2_vs_ZH6_S2	--	PREDICTED: replication protein A 14 kDa subunit B-like [Glycine max]>gi|734414592|gb|KHN37423.1| hypothetical protein glysoja_013638 [Glycine soja]	2.48226	24.0124	2.73814	2.56013	3.30445	9.67014	3.07166	2.92215
arahy.ATW5XU	ZH16_S1_vs_ZH6_S1	--	cation/H+ exchanger 20	5.27034	0.367394	0.726958	0.409376	1.73444	0.796238	0.586824	0.206918
arahy.7MKZ5R	ZH16_S4_vs_ZH6_S4	--	katanin p60 ATPase-containing subunit A-like 2-like [Glycine max]	0.337395	3.67805	0.873364	2.29715	0	0.657765	0.471443	0
arahy.E1UHJ9	ZH16_S1_vs_ZH6_S1	TF	GATA transcription factor 9	37.1818	0.144477	0.82509	0.706771	17.1692	0.186601	0.254703	0.748669
arahy.LT1NG7	ZH16_S4_vs_ZH6_S4	--	purple acid phosphatase 29	11.5245	7.77269	6.15786	2.60713	12.4967	10.2267	4.25969	1.19768
arahy.PK3IA3	ZH16_S3_vs_ZH6_S3	--	Cytochrome P450 superfamily protein	0	0.368836	2.27142	0.428078	0.0249138	0.214929	0.0843382	0.0307083
Novel04974	ZH16_S2_vs_ZH6_S2	--	hypothetical protein POPTR_0017s12850g [Populus trichocarpa]>gi|550320159|gb|EEF04239.2| hypothetical protein POPTR_0017s12850g [Populus trichocarpa]	19.0663	4.7454	0.454244	0.339937	19.5885	1.60312	0.660516	0.698805
arahy.UDJX6I	ZH16_S4_vs_ZH6_S4	--	chalcone synthase [Glycine max]	0.42709	56.4742	71.9307	19.8888	1.15206	91.6792	41.8609	6.13664
arahy.5TMB2W	ZH16_S1_vs_ZH6_S1	--	Unknown protein	3.45357	4.44308	1.72213	0.705769	1.53959	2.73911	1.17871	0.92915
arahy.R1FZ8C	ZH16_S1_vs_ZH6_S1	--	SPX domain gene 1	241.216	2.98218	8.25413	2.65321	107.325	2.91134	4.30009	3.75759
arahy.Y7RTA6	ZH16_S4_vs_ZH6_S4	--	ATPase family AAA domain-containing protein 1-like [Glycine max]	35.0337	63.2759	28.604	35.6193	19.9661	34.4559	18.9054	16.8156
Novel03584	ZH16_S3_vs_ZH6_S3	--	PREDICTED: probable galacturonosyltransferase-like 3-like [Glycine max]	35.0166	6.24795	18.0816	9.41698	29.9609	11.8346	6.29638	6.832
arahy.HMY8CZ	ZH16_S1_vs_ZH6_S1	--	tRNA wybutosine-synthesizing protein 1 homolog [Glycine max]	0.534466	1.13698	0.954281	0.960976	0.0928481	0.889597	0.675554	0.728205
arahy.SZY8GR	ZH16_S1_vs_ZH6_S1	--	Reticulon family protein	0.158766	0	2.72541	15.0454	0	0	5.35805	20.9597
Novel03283	ZH16_S1_vs_ZH6_S1	--	Non-specific lipid-transfer protein [Medicago truncatula]>gi|388499808|gb|AFK37970.1| unknown [Medicago truncatula]	56.0189	0	0	0	17.7945	0	0	0
arahy.8WZF3G	ZH16_S2_vs_ZH6_S2	--	receptor-like kinase 902	0.265396	1.62547	0.588789	0.389506	0.243893	0.385666	0.214214	0.263848
Novel04439	ZH16_S1_vs_ZH6_S1	--	unknown [Glycine max]	19.4463	45.3983	27.6449	7.05566	5.7376	28.715	16.1612	3.32964
arahy.4FKJ7D	ZH16_S3_vs_ZH6_S3	--	Unknown protein	1.54663	7.11533	6.95754	4.55848	0.19607	0.328923	0	0
arahy.GXWQ1S	ZH16_S1_vs_ZH6_S1	--	disease resistance protein (TIR-NBS-LRR class), putative	0.946285	1.56534	0.796071	0.893194	0.330263	0.694053	0.521269	0.803254
Novel00666	ZH16_S1_vs_ZH6_S1	FAR1	PREDICTED: protein FAR-RED IMPAIRED RESPONSE 1-like [Glycine max]	0.600385	7.08454	6.30953	7.4575	0.119062	3.62452	5.46527	6.08058
arahy.6DQP4I	ZH16_S1_vs_ZH6_S1	--	Pentatricopeptide repeat (PPR) superfamily protein	1.91114	4.70627	2.51258	1.59939	0.761689	3.25163	2.30417	1.91286
arahy.5U28VE	ZH16_S1_vs_ZH6_S1	--	GDSL-like Lipase/Acylhydrolase superfamily protein	128.733	0.0806783	0.0936763	0	47.1278	0	0.0251005	0.0833689
arahy.Z4H4PD	ZH16_S3_vs_ZH6_S3	--	Protein phosphatase 2C family protein	4.59638	5.24795	6.79567	4.68542	6.1477	5.82754	3.25867	2.92195
arahy.NIGF9J	ZH16_S1_vs_ZH6_S1	--	LAG1 longevity assurance homolog 3	1.6153	1.86368	2.12204	1.74815	0.441563	1.71281	1.63275	2.01755

## Sheet: Down
GeneID	Differential expression stages	TF family	Fuction	ZH16S1	ZH16S2	ZH16S3	ZH16S4	ZH6S1	ZH6S2	ZH6S3	ZH6S4
Novel03761	ZH16_S1_vs_ZH6_S1;ZH16_S2_vs_ZH6_S2;ZH16_S3_vs_ZH6_S3;ZH16_S4_vs_ZH6_S4	--	--	0	0.262669	0.290112	0.0670992	2.30055	4.59437	6.76622	5.98216
arahy.RY5C40	ZH16_S1_vs_ZH6_S1;ZH16_S2_vs_ZH6_S2;ZH16_S3_vs_ZH6_S3;ZH16_S4_vs_ZH6_S4	--	peptide transporter 1	24.7497	22.9016	5.10925	2.84889	52.1556	88.786	17.6681	7.05199
Novel04376	ZH16_S1_vs_ZH6_S1;ZH16_S2_vs_ZH6_S2;ZH16_S3_vs_ZH6_S3;ZH16_S4_vs_ZH6_S4	--	--	0	0.259115	0.0748605	0	2.11679	5.76364	3.47671	3.21021
arahy.5590XE	ZH16_S1_vs_ZH6_S1;ZH16_S2_vs_ZH6_S2;ZH16_S3_vs_ZH6_S3;ZH16_S4_vs_ZH6_S4	--	protein FLX-like 3-like isoform X1 [Glycine max]	6.67568	3.9749	3.31019	2.28652	14.6194	12.3557	7.56786	5.56092
arahy.Z456W4	ZH16_S1_vs_ZH6_S1;ZH16_S2_vs_ZH6_S2;ZH16_S3_vs_ZH6_S3;ZH16_S4_vs_ZH6_S4	--	ubiquitin-like modifier-activating enzyme	4.97588	6.509	4.71673	4.54612	15.1559	13.6112	11.9613	10.1534
arahy.B16QUM	ZH16_S1_vs_ZH6_S1;ZH16_S2_vs_ZH6_S2;ZH16_S3_vs_ZH6_S3;ZH16_S4_vs_ZH6_S4	--	serine/threonine protein kinase 1	0.41107	0.0373798	1.23564	0.757999	3.57535	1.80961	4.61675	5.88783
arahy.F6QEBB	ZH16_S1_vs_ZH6_S1;ZH16_S2_vs_ZH6_S2;ZH16_S3_vs_ZH6_S3;ZH16_S4_vs_ZH6_S4	--	cycloartenol synthase 1	7.35887	13.8368	11.9357	10.2828	34.9887	70.8106	50.9548	35.0231
Novel03351	ZH16_S1_vs_ZH6_S1;ZH16_S2_vs_ZH6_S2;ZH16_S3_vs_ZH6_S3;ZH16_S4_vs_ZH6_S4	--	PREDICTED: serine/threonine-protein kinase HT1-like [Glycine max]	0	0	0.112352	0	3.03692	7.64741	3.69364	3.15655
Novel03703	ZH16_S1_vs_ZH6_S1;ZH16_S2_vs_ZH6_S2;ZH16_S3_vs_ZH6_S3;ZH16_S4_vs_ZH6_S4	--	unknown [Lotus japonicus]	0.144781	0	0.278331	0	22.367	20.784	11.2382	9.68929
Novel03010	ZH16_S1_vs_ZH6_S1;ZH16_S2_vs_ZH6_S2;ZH16_S3_vs_ZH6_S3;ZH16_S4_vs_ZH6_S4	--	--	0	0	0.231377	0.0261181	1.39321	8.99592	4.6058	2.68634
Novel02246	ZH16_S1_vs_ZH6_S1;ZH16_S2_vs_ZH6_S2;ZH16_S3_vs_ZH6_S3;ZH16_S4_vs_ZH6_S4	--	--	0	0	0.559096	0.0448675	6.49729	16.4981	8.53515	7.78972
Novel02633	ZH16_S1_vs_ZH6_S1;ZH16_S2_vs_ZH6_S2;ZH16_S3_vs_ZH6_S3;ZH16_S4_vs_ZH6_S4	--	--	0.117567	0.878032	0.938354	0	11.766	17.7365	11.9752	9.93417
Novel02675	ZH16_S1_vs_ZH6_S1;ZH16_S2_vs_ZH6_S2;ZH16_S3_vs_ZH6_S3;ZH16_S4_vs_ZH6_S4	--	--	0.0538401	0.0193194	0.35589	0	3.76444	31.3221	15.2905	11.5618
Novel04027	ZH16_S1_vs_ZH6_S1;ZH16_S2_vs_ZH6_S2;ZH16_S3_vs_ZH6_S3;ZH16_S4_vs_ZH6_S4	--	--	0	0.0954148	0.119706	0	0.713924	5.69453	1.81686	1.2975
Novel03611	ZH16_S1_vs_ZH6_S1;ZH16_S2_vs_ZH6_S2;ZH16_S3_vs_ZH6_S3;ZH16_S4_vs_ZH6_S4	--	PREDICTED: uncharacterized protein LOC104902499 [Beta vulgaris subsp. vulgaris]	0.0561015	0.107746	0.105864	0.0514247	4.23179	3.96569	3.87037	3.40967
Novel01644	ZH16_S1_vs_ZH6_S1;ZH16_S2_vs_ZH6_S2;ZH16_S3_vs_ZH6_S3;ZH16_S4_vs_ZH6_S4	--	40S ribosomal protein s9, partial [Camellia sinensis]	0	0.0810834	0.21046	0.119749	5.06964	13.0363	10.1153	7.30798
arahy.9KNA7D	ZH16_S1_vs_ZH6_S1;ZH16_S2_vs_ZH6_S2;ZH16_S3_vs_ZH6_S3;ZH16_S4_vs_ZH6_S4	--	cyclic nucleotide-gated channel 15	0	0.454383	3.02147	0.38691	51.0013	164.246	101.779	117.806
Novel04877	ZH16_S1_vs_ZH6_S1;ZH16_S2_vs_ZH6_S2;ZH16_S3_vs_ZH6_S3;ZH16_S4_vs_ZH6_S4	--	Uncharacterized protein TCM_026608 [Theobroma cacao]>gi|508719534|gb|EOY11431.1| Uncharacterized protein TCM_026608 [Theobroma cacao]	0	0	0.192739	0	4.07428	1.59305	2.60726	0.606276
arahy.PRAL1M	ZH16_S1_vs_ZH6_S1;ZH16_S2_vs_ZH6_S2;ZH16_S3_vs_ZH6_S3;ZH16_S4_vs_ZH6_S4	--	elongation defective 1 protein / ELD1 protein	0.0376525	0.0503055	0.0661364	0	1.6524	5.82404	2.66057	2.41137
Novel03549	ZH16_S1_vs_ZH6_S1;ZH16_S2_vs_ZH6_S2;ZH16_S3_vs_ZH6_S3;ZH16_S4_vs_ZH6_S4	--	--	0	0	0.403937	0	6.67383	17.7869	8.91898	8.12212
arahy.5HRA6T	ZH16_S1_vs_ZH6_S1;ZH16_S2_vs_ZH6_S2;ZH16_S3_vs_ZH6_S3;ZH16_S4_vs_ZH6_S4	--	receptor kinase 3	0	0.0292198	0.209783	0	2.35386	4.61284	1.76263	2.73968
Novel04372	ZH16_S1_vs_ZH6_S1;ZH16_S2_vs_ZH6_S2;ZH16_S3_vs_ZH6_S3;ZH16_S4_vs_ZH6_S4	--	--	0	0	0.0821675	0	0.712386	5.11922	2.26048	1.67483
arahy.AZZ8MP	ZH16_S1_vs_ZH6_S1;ZH16_S2_vs_ZH6_S2;ZH16_S3_vs_ZH6_S3;ZH16_S4_vs_ZH6_S4	--	Oxysterol-binding family protein	0.404726	1.73689	0.413269	0.184328	2.46803	8.34312	4.88416	3.83423
arahy.VKWK3F	ZH16_S1_vs_ZH6_S1;ZH16_S2_vs_ZH6_S2;ZH16_S3_vs_ZH6_S3;ZH16_S4_vs_ZH6_S4	--	preprotein translocase subunit SecA	0.0525334	0.060929	0.551686	0	9.43212	21.5813	16.279	16.638
Novel05069	ZH16_S1_vs_ZH6_S1;ZH16_S2_vs_ZH6_S2;ZH16_S3_vs_ZH6_S3;ZH16_S4_vs_ZH6_S4	--	--	0	0	0.123202	0	1.45017	2.85	2.48727	2.5669
arahy.56XWA4	ZH16_S1_vs_ZH6_S1;ZH16_S2_vs_ZH6_S2;ZH16_S3_vs_ZH6_S3;ZH16_S4_vs_ZH6_S4	--	circadian clock coupling factor ZGT	0.266835	1.75693	4.30893	5.71016	2.37752	4.00289	15.0078	13.5232
arahy.3VL916	ZH16_S1_vs_ZH6_S1;ZH16_S2_vs_ZH6_S2;ZH16_S3_vs_ZH6_S3;ZH16_S4_vs_ZH6_S4	--	pyruvate dehydrogenase E1 component, alpha subunit	0	0	0.303616	0	8.34171	12.3183	11.5314	7.51433
Novel03448	ZH16_S1_vs_ZH6_S1;ZH16_S2_vs_ZH6_S2;ZH16_S3_vs_ZH6_S3;ZH16_S4_vs_ZH6_S4	--	--	0	0	0.232553	0.0426931	0.93774	8.55327	6.1612	4.82584
Novel01255	ZH16_S1_vs_ZH6_S1;ZH16_S2_vs_ZH6_S2;ZH16_S3_vs_ZH6_S3;ZH16_S4_vs_ZH6_S4	--	PREDICTED: serine/threonine-protein phosphatase 7 long form homolog [Cucumis sativus]>gi|778698307|ref|XP_011654505.1| PREDICTED: serine/threonine-protein phosphatase 7 long form homolog [Cucumis sativus]>gi|778698310|ref|XP_011654506.1| PREDICTED: serine/threonine-protein phosphatase 7 long form homolog [Cucumis sativus]	0	0.134539	0.0649777	0	0.486749	5.95132	2.75536	2.26485
Novel04287	ZH16_S1_vs_ZH6_S1;ZH16_S2_vs_ZH6_S2;ZH16_S3_vs_ZH6_S3;ZH16_S4_vs_ZH6_S4	--	--	0	0	0	0	0.397183	2.46278	1.74437	1.38729
Novel02124	ZH16_S1_vs_ZH6_S1;ZH16_S2_vs_ZH6_S2;ZH16_S3_vs_ZH6_S3;ZH16_S4_vs_ZH6_S4	--	PREDICTED: TPR repeat-containing thioredoxin TTL1-like [Glycine max]	0.0239333	0	0.104023	0	1.41032	3.62236	2.51144	2.1673
Novel01547	ZH16_S1_vs_ZH6_S1;ZH16_S2_vs_ZH6_S2;ZH16_S3_vs_ZH6_S3;ZH16_S4_vs_ZH6_S4	--	hypothetical protein VITISV_001578 [Vitis vinifera]	0	0.051566	0.18816	0	5.27217	3.1267	3.60153	3.31489
Novel01796	ZH16_S1_vs_ZH6_S1;ZH16_S2_vs_ZH6_S2;ZH16_S3_vs_ZH6_S3;ZH16_S4_vs_ZH6_S4	--	--	0	0.0337717	0.81775	0.0431352	27.8684	33.8095	15.6442	12.3505
Novel04147	ZH16_S1_vs_ZH6_S1;ZH16_S2_vs_ZH6_S2;ZH16_S3_vs_ZH6_S3;ZH16_S4_vs_ZH6_S4	--	PREDICTED: uncharacterized protein LOC103323054 [Prunus mume]	0.133483	0.189968	0.228824	0	1.23777	2.84018	4.28022	5.91664
arahy.RS9BE1	ZH16_S1_vs_ZH6_S1;ZH16_S2_vs_ZH6_S2;ZH16_S3_vs_ZH6_S3;ZH16_S4_vs_ZH6_S4	--	unknown protein	0.955939	1.47708	3.13691	1.04346	8.38494	11.4171	11.4134	8.04693
arahy.U38C07	ZH16_S1_vs_ZH6_S1;ZH16_S2_vs_ZH6_S2;ZH16_S3_vs_ZH6_S3;ZH16_S4_vs_ZH6_S4	TF	transcription factor TGA1-like isoform X1 [Glycine max]	0.167257	0.0812138	0.557404	0.602004	0.992207	0.604188	2.42078	2.35238
arahy.LRZU8J	ZH16_S1_vs_ZH6_S1;ZH16_S2_vs_ZH6_S2;ZH16_S3_vs_ZH6_S3;ZH16_S4_vs_ZH6_S4	--	ribosomal protein L11 methyltransferase-related	0	0.0493477	0.0421398	0.0728797	1.05123	9.76387	4.82069	5.90485
Novel02394	ZH16_S1_vs_ZH6_S1;ZH16_S2_vs_ZH6_S2;ZH16_S3_vs_ZH6_S3;ZH16_S4_vs_ZH6_S4	--	hypothetical protein [Beta vulgaris subsp. vulgaris]	0.0633722	0.205689	0.22845	0.00877829	0.781746	2.46785	0.817234	1.16863
arahy.IB1TIP	ZH16_S1_vs_ZH6_S1;ZH16_S2_vs_ZH6_S2;ZH16_S3_vs_ZH6_S3;ZH16_S4_vs_ZH6_S4	--	acyl-protein thioesterase	0.0658835	0.301681	0.173313	0.0275745	4.52993	4.47394	2.48127	1.8706
arahy.RYU1I8	ZH16_S1_vs_ZH6_S1;ZH16_S2_vs_ZH6_S2;ZH16_S3_vs_ZH6_S3;ZH16_S4_vs_ZH6_S4	--	glucan endo-1,3-beta-glucosidase-like protein	0.0852173	0.620749	0.502201	0	9.4784	32.0902	25.8673	21.7402
arahy.F551YR	ZH16_S1_vs_ZH6_S1;ZH16_S2_vs_ZH6_S2;ZH16_S3_vs_ZH6_S3;ZH16_S4_vs_ZH6_S4	--	Autophagy-related protein 13	0.100644	0	0.0364562	0.0279585	0.500033	0.86906	0.93182	0.855
arahy.CVK6CU	ZH16_S1_vs_ZH6_S1;ZH16_S2_vs_ZH6_S2;ZH16_S3_vs_ZH6_S3;ZH16_S4_vs_ZH6_S4	--	PolI-like B DNA polymerase	1.03694	4.92307	0.896326	0.23198	3.01935	9.98942	4.71905	3.43061
arahy.DA2DAM	ZH16_S1_vs_ZH6_S1;ZH16_S2_vs_ZH6_S2;ZH16_S3_vs_ZH6_S3;ZH16_S4_vs_ZH6_S4	--	Pseudouridine synthase family protein	0	0	0.248149	0	5.41358	11.3199	10.2158	8.88424
arahy.HDV1A7	ZH16_S1_vs_ZH6_S1;ZH16_S2_vs_ZH6_S2;ZH16_S3_vs_ZH6_S3;ZH16_S4_vs_ZH6_S4	--	auxin canalisation protein	0.948549	1.7554	5.12261	0	8.00464	21.2303	15.7314	10.8426
Novel00720	ZH16_S1_vs_ZH6_S1;ZH16_S2_vs_ZH6_S2;ZH16_S3_vs_ZH6_S3;ZH16_S4_vs_ZH6_S4	--	--	0	0	0.479346	0	6.9887	15.2867	11.4565	9.13297
arahy.LSU1R7	ZH16_S1_vs_ZH6_S1;ZH16_S2_vs_ZH6_S2;ZH16_S3_vs_ZH6_S3;ZH16_S4_vs_ZH6_S4	--	Unknown protein	0	0	0.110261	0.0562114	1.94975	2.58308	3.06685	2.52142
Novel04576	ZH16_S1_vs_ZH6_S1;ZH16_S2_vs_ZH6_S2;ZH16_S3_vs_ZH6_S3;ZH16_S4_vs_ZH6_S4	--	hypothetical protein BVRB_5g099540 [Beta vulgaris subsp. vulgaris]	0.63655	0.101195	0.282081	0	5.66491	4.02065	3.48552	0.825526
arahy.D1W91V	ZH16_S1_vs_ZH6_S1;ZH16_S2_vs_ZH6_S2;ZH16_S3_vs_ZH6_S3;ZH16_S4_vs_ZH6_S4	--	alpha-glucosidase	0.32384	0.231259	0.967093	0.13395	47.5025	15.2584	25.1935	15.6161
arahy.4EVV01	ZH16_S1_vs_ZH6_S1;ZH16_S2_vs_ZH6_S2;ZH16_S3_vs_ZH6_S3;ZH16_S4_vs_ZH6_S4	--	high affinity nitrate transporter 2.6	0.290171	0.593357	0.939668	0.607257	2.03816	18.4688	9.49133	7.18181
Novel00186	ZH16_S1_vs_ZH6_S1;ZH16_S2_vs_ZH6_S2;ZH16_S3_vs_ZH6_S3;ZH16_S4_vs_ZH6_S4	--	--	0	0	0.209397	0	1.24869	5.55773	2.91165	2.74447
Novel01562	ZH16_S1_vs_ZH6_S1;ZH16_S2_vs_ZH6_S2;ZH16_S3_vs_ZH6_S3;ZH16_S4_vs_ZH6_S4	--	hypothetical protein MTR_2g038090 [Medicago truncatula]>gi|87162683|gb|ABD28478.1| 4/1 protein, putative [Medicago truncatula]>gi|355484131|gb|AES65334.1| 4/1 protein short form protein [Medicago truncatula]	0.0247634	0	0.0414458	0.0244311	8.0284	2.5926	1.96595	2.04253
arahy.5H7955	ZH16_S1_vs_ZH6_S1;ZH16_S2_vs_ZH6_S2;ZH16_S3_vs_ZH6_S3;ZH16_S4_vs_ZH6_S4	--	probable quinone oxidoreductase-like [Glycine max]	0.127212	0.336573	0.129152	0	1.62538	4.63421	2.41537	3.47298
Novel03262	ZH16_S1_vs_ZH6_S1;ZH16_S2_vs_ZH6_S2;ZH16_S3_vs_ZH6_S3;ZH16_S4_vs_ZH6_S4	--	--	0	0	0.0899431	0	0.982114	3.15185	3.02843	0.707361
arahy.I0PDCZ	ZH16_S1_vs_ZH6_S1;ZH16_S2_vs_ZH6_S2;ZH16_S3_vs_ZH6_S3;ZH16_S4_vs_ZH6_S4	--	cinnamyl alcohol dehydrogenase	0.0829119	0	0.560255	0.163877	1.70961	11.181	6.10875	4.62236
arahy.M6S7AL	ZH16_S1_vs_ZH6_S1;ZH16_S2_vs_ZH6_S2;ZH16_S3_vs_ZH6_S3;ZH16_S4_vs_ZH6_S4	--	DSBA oxidoreductase family protein	8.23345	5.67516	2.69344	1.80085	16.2236	11.9825	6.86706	6.30751
Novel03610	ZH16_S1_vs_ZH6_S1;ZH16_S2_vs_ZH6_S2;ZH16_S3_vs_ZH6_S3;ZH16_S4_vs_ZH6_S4	--	--	0	0	0.0210848	0	2.1386	4.33651	2.05098	2.0145
arahy.FDP8U9	ZH16_S1_vs_ZH6_S1;ZH16_S2_vs_ZH6_S2;ZH16_S3_vs_ZH6_S3;ZH16_S4_vs_ZH6_S4	--	callose synthase 5	0.0754577	0.0962958	2.31565	0	4.07666	13.8591	6.86333	5.58299
Novel00117	ZH16_S1_vs_ZH6_S1;ZH16_S2_vs_ZH6_S2;ZH16_S3_vs_ZH6_S3;ZH16_S4_vs_ZH6_S4	--	PREDICTED: uncharacterized protein LOC103936764 [Pyrus x bretschneideri]	0.609886	2.36145	1.4375	1.57814	1.41089	6.53215	4.03141	5.6695
arahy.WA3QT0	ZH16_S1_vs_ZH6_S1;ZH16_S2_vs_ZH6_S2;ZH16_S3_vs_ZH6_S3;ZH16_S4_vs_ZH6_S4	--	myosin 1	0	0.452327	4.13537	0	42.9649	179.437	116.474	104.257
Novel01688	ZH16_S1_vs_ZH6_S1;ZH16_S2_vs_ZH6_S2;ZH16_S3_vs_ZH6_S3;ZH16_S4_vs_ZH6_S4	--	--	0	0.682917	0.844167	0.101393	6.38402	11.7313	13.909	12.6504
Novel01820	ZH16_S1_vs_ZH6_S1;ZH16_S2_vs_ZH6_S2;ZH16_S3_vs_ZH6_S3;ZH16_S4_vs_ZH6_S4	--	--	0.082819	0	0.712506	0	4.46073	19.9633	7.77046	5.25686
Novel02839	ZH16_S1_vs_ZH6_S1;ZH16_S2_vs_ZH6_S2;ZH16_S3_vs_ZH6_S3;ZH16_S4_vs_ZH6_S4	--	Transportin-3 [Medicago truncatula]	0	0	0.303964	0	1.1791	6.62285	5.31083	4.50913
arahy.V3D0DH	ZH16_S1_vs_ZH6_S1;ZH16_S2_vs_ZH6_S2;ZH16_S3_vs_ZH6_S3;ZH16_S4_vs_ZH6_S4	--	SWAP (Suppressor-of-White-APricot)/surp RNA-binding domain-containing protein	7.72376	10.7682	8.07213	5.46427	41.6486	61.2813	33.0372	26.7517
Novel01129	ZH16_S1_vs_ZH6_S1;ZH16_S2_vs_ZH6_S2;ZH16_S3_vs_ZH6_S3;ZH16_S4_vs_ZH6_S4	--	PREDICTED: uncharacterized protein LOC103936764 [Pyrus x bretschneideri]	0.0223441	0.0298528	0.0314445	0	2.37096	3.2968	1.10522	0.653629
Novel00361	ZH16_S1_vs_ZH6_S1;ZH16_S2_vs_ZH6_S2;ZH16_S3_vs_ZH6_S3;ZH16_S4_vs_ZH6_S4	--	Ribonuclease H protein [Theobroma cacao]>gi|508706118|gb|EOX98014.1| Ribonuclease H protein [Theobroma cacao]	0	0	0.206028	0	3.84256	6.63357	4.7413	1.53416
arahy.ZVY5TW	ZH16_S1_vs_ZH6_S1;ZH16_S2_vs_ZH6_S2;ZH16_S3_vs_ZH6_S3;ZH16_S4_vs_ZH6_S4	--	nudix hydrolase 10-like isoform X2 [Glycine max]	0	0.0491569	0.266095	0	3.79974	13.9615	8.20237	5.73232
arahy.SF8VIF	ZH16_S1_vs_ZH6_S1;ZH16_S2_vs_ZH6_S2;ZH16_S3_vs_ZH6_S3;ZH16_S4_vs_ZH6_S4	TF	general transcription factor 3C-like protein	0	0.0762255	0.431249	0.0973596	4.00841	14.6533	15.1768	7.37782
Novel02379	ZH16_S1_vs_ZH6_S1;ZH16_S2_vs_ZH6_S2;ZH16_S3_vs_ZH6_S3;ZH16_S4_vs_ZH6_S4	--	RNA-directed DNA polymerase [Arachis hypogaea]	0.0348479	0	0.10537	0	1.68886	2.44337	1.7895	1.49771
Novel03644	ZH16_S1_vs_ZH6_S1;ZH16_S2_vs_ZH6_S2;ZH16_S3_vs_ZH6_S3;ZH16_S4_vs_ZH6_S4	--	PREDICTED: putative ribonuclease H protein At1g65750 [Prunus mume]	0	0	0.093682	0	5.18547	6.71673	3.3807	2.92813
arahy.JRP81T	ZH16_S1_vs_ZH6_S1;ZH16_S2_vs_ZH6_S2;ZH16_S3_vs_ZH6_S3;ZH16_S4_vs_ZH6_S4	--	Unknown protein	0	0	0.0419034	0	1.22006	8.00584	5.19057	1.9426
Novel02303	ZH16_S1_vs_ZH6_S1;ZH16_S2_vs_ZH6_S2;ZH16_S3_vs_ZH6_S3;ZH16_S4_vs_ZH6_S4	--	PREDICTED: uncharacterized protein LOC104248599 [Nicotiana sylvestris]>gi|698516629|ref|XP_009803197.1| PREDICTED: uncharacterized protein LOC104248599 [Nicotiana sylvestris]>gi|698516631|ref|XP_009803199.1| PREDICTED: uncharacterized protein LOC104248599 [Nicotiana sylvestris]>gi|698516633|ref|XP_009803200.1| PREDICTED: uncharacterized protein LOC104248599 [Nicotiana sylvestris]>gi|698516635|ref…	0.0537337	0	0.135671	0	3.85511	3.22444	4.56904	4.03883
Novel01564	ZH16_S1_vs_ZH6_S1;ZH16_S2_vs_ZH6_S2;ZH16_S3_vs_ZH6_S3;ZH16_S4_vs_ZH6_S4	--	retrotransposon gag protein [Arachis hypogaea]	0.0942721	0.0166054	0.348804	0.0212093	3.22686	13.7323	4.93869	4.68512
arahy.QDN3CU	ZH16_S1_vs_ZH6_S1;ZH16_S2_vs_ZH6_S2;ZH16_S3_vs_ZH6_S3;ZH16_S4_vs_ZH6_S4	--	mitochondrial-processing peptidase subunit alpha-like [Glycine max]	0	0	0.168147	0	1.63293	2.74793	3.05207	1.62636
arahy.107ZNT	ZH16_S1_vs_ZH6_S1;ZH16_S2_vs_ZH6_S2;ZH16_S3_vs_ZH6_S3;ZH16_S4_vs_ZH6_S4	--	ribosomal RNA large subunit methyltransferase	0.0433739	0.11443	0.395552	0	10.8645	21.7887	12.5601	9.88036
arahy.12N6X7	ZH16_S1_vs_ZH6_S1;ZH16_S2_vs_ZH6_S2;ZH16_S3_vs_ZH6_S3;ZH16_S4_vs_ZH6_S4	--	Rubber elongation factor protein (REF)	4.00429	8.97936	14.8623	3.51265	20.3935	28.0923	52.9263	25.1501
arahy.7R7SHJ	ZH16_S1_vs_ZH6_S1;ZH16_S2_vs_ZH6_S2;ZH16_S3_vs_ZH6_S3;ZH16_S4_vs_ZH6_S4	--	D-glycerate 3-kinase	0.045346	0	0.185168	0	5.33091	10.0324	6.71945	4.55198
arahy.31ZIBY	ZH16_S1_vs_ZH6_S1;ZH16_S2_vs_ZH6_S2;ZH16_S3_vs_ZH6_S3;ZH16_S4_vs_ZH6_S4	--	RNA-binding protein 1	0	0	0.264454	0.0188192	3.50986	11.077	10.251	11.6031
Novel00456	ZH16_S1_vs_ZH6_S1;ZH16_S2_vs_ZH6_S2;ZH16_S3_vs_ZH6_S3;ZH16_S4_vs_ZH6_S4	--	PREDICTED: uncharacterized protein LOC101492469 isoform X1 [Cicer arietinum]	0.136115	0.352388	1.23183	0.205642	22.0045	39.767	22.7347	23.4074
Novel01592	ZH16_S1_vs_ZH6_S1;ZH16_S2_vs_ZH6_S2;ZH16_S3_vs_ZH6_S3;ZH16_S4_vs_ZH6_S4	--	PREDICTED: pentatricopeptide repeat-containing protein At1g71460, chloroplastic [Fragaria vesca subsp. vesca]>gi|764627538|ref|XP_011469261.1| PREDICTED: pentatricopeptide repeat-containing protein At1g71460, chloroplastic [Fragaria vesca subsp. vesca]	0.0328987	0.0219771	0.0563011	0	4.07098	11.039	6.59787	6.07958
Novel02187	ZH16_S1_vs_ZH6_S1;ZH16_S2_vs_ZH6_S2;ZH16_S3_vs_ZH6_S3;ZH16_S4_vs_ZH6_S4	--	--	0	0.330774	0.181811	0.0653016	0.697571	4.88353	2.49719	2.29675
Novel03600	ZH16_S1_vs_ZH6_S1;ZH16_S2_vs_ZH6_S2;ZH16_S3_vs_ZH6_S3;ZH16_S4_vs_ZH6_S4	--	unnamed protein product [Coffea canephora]	0	0	0.0312849	0	1.21953	4.90008	2.59871	2.67019
Novel02808	ZH16_S1_vs_ZH6_S1;ZH16_S2_vs_ZH6_S2;ZH16_S3_vs_ZH6_S3;ZH16_S4_vs_ZH6_S4	--	--	0.146439	0.67454	0.237823	0	7.43188	13.8804	6.58476	5.3673
arahy.511LEY	ZH16_S1_vs_ZH6_S1;ZH16_S2_vs_ZH6_S2;ZH16_S3_vs_ZH6_S3;ZH16_S4_vs_ZH6_S4	--	callose synthase 5	0.221116	0	0.292925	0	7.06012	11.8869	8.39107	6.1752
Novel03332	ZH16_S1_vs_ZH6_S1;ZH16_S2_vs_ZH6_S2;ZH16_S3_vs_ZH6_S3;ZH16_S4_vs_ZH6_S4	--	putative RNA-directed DNA polymerase [Arachis hypogaea]	0.487195	4.71235	2.86163	3.04647	1.2995	11.0104	6.45216	6.7226
arahy.TD4UZM	ZH16_S1_vs_ZH6_S1;ZH16_S2_vs_ZH6_S2;ZH16_S3_vs_ZH6_S3;ZH16_S4_vs_ZH6_S4	--	Transmembrane amino acid transporter family protein	1.73449	1.93978	0.671439	0.296446	6.69593	18.5368	7.81877	4.82082
arahy.EVR0EE	ZH16_S1_vs_ZH6_S1;ZH16_S2_vs_ZH6_S2;ZH16_S3_vs_ZH6_S3;ZH16_S4_vs_ZH6_S4	--	proteasome subunit alpha type-6-A protein	0	0	0.152784	0	0.615338	3.55983	2.70587	2.13281
Novel02606	ZH16_S1_vs_ZH6_S1;ZH16_S2_vs_ZH6_S2;ZH16_S3_vs_ZH6_S3;ZH16_S4_vs_ZH6_S4	--	PREDICTED: type I inositol 1,4,5-trisphosphate 5-phosphatase CVP2-like isoform X2 [Glycine max]	0	0	0	0.0414956	1.69134	8.31066	4.23888	3.07495
arahy.09HEKB	ZH16_S1_vs_ZH6_S1;ZH16_S2_vs_ZH6_S2;ZH16_S3_vs_ZH6_S3;ZH16_S4_vs_ZH6_S4	--	metal-nicotianamine transporter YSL3-like isoform X3 [Glycine max]	1.79944	2.32216	0.414787	0.157797	10.9299	16.036	4.47389	2.72823
arahy.FR7HFM	ZH16_S1_vs_ZH6_S1;ZH16_S2_vs_ZH6_S2;ZH16_S3_vs_ZH6_S3;ZH16_S4_vs_ZH6_S4	--	Unknown protein	0	0.240081	1.14606	0	3.93557	8.43352	6.97738	4.78958
arahy.J1CJLL	ZH16_S1_vs_ZH6_S1;ZH16_S2_vs_ZH6_S2;ZH16_S3_vs_ZH6_S3;ZH16_S4_vs_ZH6_S4	--	nucleobase-ascorbate transporter 6-like [Glycine max]	0	0.0851149	0.292551	0	6.25478	14.0256	10.0633	9.17395
Novel04518	ZH16_S1_vs_ZH6_S1;ZH16_S2_vs_ZH6_S2;ZH16_S3_vs_ZH6_S3;ZH16_S4_vs_ZH6_S4	--	Auxin Efflux Carrier [Medicago truncatula]	0	0	0.110725	0	3.24352	10.6395	5.40123	4.13566
Novel04452	ZH16_S1_vs_ZH6_S1;ZH16_S2_vs_ZH6_S2;ZH16_S3_vs_ZH6_S3;ZH16_S4_vs_ZH6_S4	--	--	0	0	0	0.0515433	1.18157	4.80902	4.44425	2.62244
arahy.RLB0VK	ZH16_S1_vs_ZH6_S1;ZH16_S2_vs_ZH6_S2;ZH16_S3_vs_ZH6_S3;ZH16_S4_vs_ZH6_S4	--	MATE efflux family protein	0	0	0.0447597	0	0.356582	5.42023	4.52515	3.85699
arahy.7JQX15	ZH16_S1_vs_ZH6_S1;ZH16_S2_vs_ZH6_S2;ZH16_S3_vs_ZH6_S3;ZH16_S4_vs_ZH6_S4	--	glucose-6-phosphate isomerase	2.39856	5.90221	2.84374	2.99701	33.075	40.8235	25.48	16.0823
arahy.4QP1TN	ZH16_S1_vs_ZH6_S1;ZH16_S2_vs_ZH6_S2;ZH16_S3_vs_ZH6_S3;ZH16_S4_vs_ZH6_S4	--	zinc finger CCCH domain-containing protein 48-like isoform X1 [Glycine max]	0	0.385315	0.739315	0	8.94246	53.8659	45.6442	35.7437
Novel01138	ZH16_S1_vs_ZH6_S1;ZH16_S2_vs_ZH6_S2;ZH16_S3_vs_ZH6_S3;ZH16_S4_vs_ZH6_S4	--	--	0.0472316	0.0418011	0.332559	0	1.1722	5.73327	3.39416	2.78746
arahy.N2RJA4	ZH16_S1_vs_ZH6_S1;ZH16_S2_vs_ZH6_S2;ZH16_S3_vs_ZH6_S3;ZH16_S4_vs_ZH6_S4	--	Unknown protein	0.300289	0	0.399778	0	15.7666	28.9883	16.4752	10.9226
arahy.LF1DJC	ZH16_S1_vs_ZH6_S1;ZH16_S2_vs_ZH6_S2;ZH16_S3_vs_ZH6_S3;ZH16_S4_vs_ZH6_S4	--	ureide permease 2	0.0996564	0.10889	0.165109	0.0198588	2.95556	3.26534	3.68075	6.74621
Novel00370	ZH16_S1_vs_ZH6_S1;ZH16_S2_vs_ZH6_S2;ZH16_S3_vs_ZH6_S3;ZH16_S4_vs_ZH6_S4	--	--	0	0.553488	0.492088	0.0509081	1.31243	6.98045	8.32184	7.7159
Novel00332	ZH16_S1_vs_ZH6_S1;ZH16_S2_vs_ZH6_S2;ZH16_S3_vs_ZH6_S3;ZH16_S4_vs_ZH6_S4	--	--	0	0	0.217096	0	1.77153	5.36028	4.15775	3.02744
Novel01579	ZH16_S1_vs_ZH6_S1;ZH16_S2_vs_ZH6_S2;ZH16_S3_vs_ZH6_S3;ZH16_S4_vs_ZH6_S4	--	--	0.0261288	0.309424	0.158234	0	1.09824	5.54097	5.64042	4.07063
arahy.WDY3XU	ZH16_S1_vs_ZH6_S1;ZH16_S2_vs_ZH6_S2;ZH16_S3_vs_ZH6_S3;ZH16_S4_vs_ZH6_S4	--	CAAX amino terminal protease family protein	0.0722255	0	0.184055	0	4.72894	13.875	7.19207	3.7254
arahy.27KESB	ZH16_S1_vs_ZH6_S1;ZH16_S2_vs_ZH6_S2;ZH16_S3_vs_ZH6_S3;ZH16_S4_vs_ZH6_S4	--	GTP-binding nuclear protein Ran-3 [Glycine max]	3.80618	2.00066	2.23372	0.725854	41.2625	8.90502	6.444	3.99305
Novel02856	ZH16_S1_vs_ZH6_S1;ZH16_S2_vs_ZH6_S2;ZH16_S3_vs_ZH6_S3;ZH16_S4_vs_ZH6_S4	--	LRR receptor-like serine/threonine-protein kinase GSO1 [Glycine soja]	0	0.774269	0.392977	0.0286849	3.77165	15.1219	8.53097	8.64398
arahy.3T4GA9	ZH16_S1_vs_ZH6_S1;ZH16_S2_vs_ZH6_S2;ZH16_S3_vs_ZH6_S3;ZH16_S4_vs_ZH6_S4	--	emp24/gp25L/p24 family/GOLD family protein	0.243062	2.11781	1.18205	1.11178	1.79059	10.4578	3.81055	3.29028
arahy.K6QJLJ	ZH16_S1_vs_ZH6_S1;ZH16_S2_vs_ZH6_S2;ZH16_S3_vs_ZH6_S3;ZH16_S4_vs_ZH6_S4	--	Unknown protein	0.198532	0.01947	0.350018	0.142284	2.79051	6.02055	3.44046	2.51711
arahy.I8PQ41	ZH16_S1_vs_ZH6_S1;ZH16_S2_vs_ZH6_S2;ZH16_S3_vs_ZH6_S3;ZH16_S4_vs_ZH6_S4	--	tripeptidyl peptidase ii	0.408379	0.0682018	0.100958	0	2.95962	4.86357	2.32337	3.4196
Novel02220	ZH16_S1_vs_ZH6_S1;ZH16_S2_vs_ZH6_S2;ZH16_S3_vs_ZH6_S3;ZH16_S4_vs_ZH6_S4	--	2-hydroxyacyl-CoA lyase [Medicago truncatula]	0	0.669599	0.133289	0	2.449	9.76555	7.17341	8.48437
arahy.354MLN	ZH16_S1_vs_ZH6_S1;ZH16_S2_vs_ZH6_S2;ZH16_S3_vs_ZH6_S3;ZH16_S4_vs_ZH6_S4	--	26S proteasome non-ATPase regulatory subunit 4 homolog isoform X4 [Glycine max]	0.0380124	0.0672837	0.548481	0	2.62183	19.3544	10.6756	10.4969
arahy.K45R6C	ZH16_S1_vs_ZH6_S1;ZH16_S2_vs_ZH6_S2;ZH16_S3_vs_ZH6_S3;ZH16_S4_vs_ZH6_S4	--	phragmoplast orienting kinesin 1	0.173863	0.0723401	0.40823	0	2.07158	2.91149	4.18844	4.77733
arahy.GN4RBX	ZH16_S1_vs_ZH6_S1;ZH16_S2_vs_ZH6_S2;ZH16_S3_vs_ZH6_S3;ZH16_S4_vs_ZH6_S4	--	Unknown protein	0	0.23964	0.148483	0	2.90571	8.6068	4.55845	4.53114
Novel03521	ZH16_S1_vs_ZH6_S1;ZH16_S2_vs_ZH6_S2;ZH16_S3_vs_ZH6_S3;ZH16_S4_vs_ZH6_S4	--	--	0	0	0.302977	0	2.91369	10.1748	5.66535	3.76217
arahy.1NF0KF	ZH16_S1_vs_ZH6_S1;ZH16_S2_vs_ZH6_S2;ZH16_S3_vs_ZH6_S3;ZH16_S4_vs_ZH6_S4	--	ribosomal protein L28	1.07634	5.19819	3.87361	2.75316	8.51165	15.664	10.7756	6.17217
Novel04281	ZH16_S1_vs_ZH6_S1;ZH16_S2_vs_ZH6_S2;ZH16_S3_vs_ZH6_S3;ZH16_S4_vs_ZH6_S4	--	--	0	0	0.139047	0.0191138	1.11641	8.663	5.06987	3.4652
arahy.726Q1X	ZH16_S1_vs_ZH6_S1;ZH16_S2_vs_ZH6_S2;ZH16_S3_vs_ZH6_S3;ZH16_S4_vs_ZH6_S4	--	Unknown protein	0.0942983	0.475643	0.975541	0.0744032	3.74622	24.3639	15.1376	14.6215
arahy.6CA9FV	ZH16_S1_vs_ZH6_S1;ZH16_S2_vs_ZH6_S2;ZH16_S3_vs_ZH6_S3;ZH16_S4_vs_ZH6_S4	--	Unknown protein	0	1.59183	1.96475	1.95498	1.72348	11.4261	9.07882	7.5081
Novel02892	ZH16_S1_vs_ZH6_S1;ZH16_S2_vs_ZH6_S2;ZH16_S3_vs_ZH6_S3;ZH16_S4_vs_ZH6_S4	--	--	0.0883087	0.0521035	5.06975	0.0665496	26.327	103.37	81.9403	71.516
arahy.8R2FC7	ZH16_S1_vs_ZH6_S1;ZH16_S2_vs_ZH6_S2;ZH16_S3_vs_ZH6_S3;ZH16_S4_vs_ZH6_S4	--	cyclin-A2-2-like [Glycine max]	0	0	0.128344	0	2.24115	11.1371	6.04965	6.00566
arahy.7CW4TA	ZH16_S1_vs_ZH6_S1;ZH16_S2_vs_ZH6_S2;ZH16_S3_vs_ZH6_S3;ZH16_S4_vs_ZH6_S4	--	Polyketide cyclase/dehydrase and lipid transport superfamily protein	0	0.585242	0.47932	0.163294	12.2711	8.70012	6.43003	3.29782
arahy.VBA0Y3	ZH16_S1_vs_ZH6_S1;ZH16_S2_vs_ZH6_S2;ZH16_S3_vs_ZH6_S3;ZH16_S4_vs_ZH6_S4	--	putative E3 ubiquitin-protein ligase LIN-like [Glycine max]	0	0.349666	0.132763	0.00781839	0.242887	1.63987	0.955735	0.654815
arahy.ERGP6F	ZH16_S1_vs_ZH6_S1;ZH16_S2_vs_ZH6_S2;ZH16_S3_vs_ZH6_S3;ZH16_S4_vs_ZH6_S4	--	flavodoxin family protein / radical SAM domain-containing protein	0.108506	0.207825	0.628696	0.0510338	2.37439	3.07312	3.15522	3.04185
Novel03723	ZH16_S1_vs_ZH6_S1;ZH16_S2_vs_ZH6_S2;ZH16_S3_vs_ZH6_S3;ZH16_S4_vs_ZH6_S4	--	--	0	0	0.261688	0.0327625	5.3311	4.85344	3.02442	1.93374
arahy.S6WAW8	ZH16_S1_vs_ZH6_S1;ZH16_S2_vs_ZH6_S2;ZH16_S3_vs_ZH6_S3;ZH16_S4_vs_ZH6_S4	--	Unknown protein	0	0.139962	0	0	1.95892	9.78253	2.85763	2.62113
arahy.LEZ1PQ	ZH16_S1_vs_ZH6_S1;ZH16_S2_vs_ZH6_S2;ZH16_S3_vs_ZH6_S3;ZH16_S4_vs_ZH6_S4	--	Protein kinase superfamily protein	0	0.325801	1.68171	0.124134	28.6036	108.722	77.3723	69.2118
arahy.VG4MW6	ZH16_S1_vs_ZH6_S1;ZH16_S2_vs_ZH6_S2;ZH16_S3_vs_ZH6_S3;ZH16_S4_vs_ZH6_S4	--	ARM REPEAT PROTEIN INTERACTING WITH ABF2-like isoform X2 [Glycine max]	2.52854	5.22303	4.13797	0.813146	6.16339	16.5377	11.0747	11.596
Novel02715	ZH16_S1_vs_ZH6_S1;ZH16_S2_vs_ZH6_S2;ZH16_S3_vs_ZH6_S3;ZH16_S4_vs_ZH6_S4	--	PREDICTED: uncharacterized protein LOC101255289 [Solanum lycopersicum]	0.0207104	0.397756	0.101536	0.212437	1.47325	5.48661	2.92236	3.38941
Novel00423	ZH16_S1_vs_ZH6_S1;ZH16_S2_vs_ZH6_S2;ZH16_S3_vs_ZH6_S3;ZH16_S4_vs_ZH6_S4	--	--	0	0	0.31896	0	0.628615	3.06182	3.50563	2.29262
Novel01762	ZH16_S1_vs_ZH6_S1;ZH16_S2_vs_ZH6_S2;ZH16_S3_vs_ZH6_S3;ZH16_S4_vs_ZH6_S4	--	hypothetical protein CICLE_v10025621mg [Citrus clementina]>gi|557529646|gb|ESR40896.1| hypothetical protein CICLE_v10025621mg [Citrus clementina]	0.0228562	0.142314	0.0420212	0.0209508	0.47043	4.08572	2.78117	2.12848
Novel03449	ZH16_S1_vs_ZH6_S1;ZH16_S2_vs_ZH6_S2;ZH16_S3_vs_ZH6_S3;ZH16_S4_vs_ZH6_S4	--	hypothetical protein PHAVU_009G260900g [Phaseolus vulgaris]>gi|561012141|gb|ESW11048.1| hypothetical protein PHAVU_009G260900g [Phaseolus vulgaris]	0	0	0.168519	0	4.27431	4.7031	4.85377	4.36027
arahy.B62L7G	ZH16_S1_vs_ZH6_S1;ZH16_S2_vs_ZH6_S2;ZH16_S3_vs_ZH6_S3;ZH16_S4_vs_ZH6_S4	--	SEC12-like protein 1-like isoform X3 [Glycine max]	0	0.0513767	0	0	1.53314	4.1975	3.9639	2.36775
Novel01921	ZH16_S1_vs_ZH6_S1;ZH16_S2_vs_ZH6_S2;ZH16_S3_vs_ZH6_S3;ZH16_S4_vs_ZH6_S4	--	--	0	0	0.522332	0	1.17003	3.34367	16.5305	10.8321
Novel02333	ZH16_S1_vs_ZH6_S1;ZH16_S2_vs_ZH6_S2;ZH16_S3_vs_ZH6_S3;ZH16_S4_vs_ZH6_S4	--	PREDICTED: uncharacterized protein LOC103936764 [Pyrus x bretschneideri]	0	0	0.0749903	0	0.197166	1.35224	1.54405	1.88141
arahy.14ZLQ3	ZH16_S1_vs_ZH6_S1;ZH16_S2_vs_ZH6_S2;ZH16_S3_vs_ZH6_S3;ZH16_S4_vs_ZH6_S4	--	pfkB-like carbohydrate kinase family protein	0	0.0270125	0.0836605	0.0205841	0.274814	2.38052	2.7776	2.01242
arahy.FM7ZD3	ZH16_S1_vs_ZH6_S1;ZH16_S2_vs_ZH6_S2;ZH16_S3_vs_ZH6_S3;ZH16_S4_vs_ZH6_S4	--	Unknown protein	0.0453675	0	0.0307062	0	0.7644	3.53698	2.71843	3.03941
Novel02828	ZH16_S1_vs_ZH6_S1;ZH16_S2_vs_ZH6_S2;ZH16_S3_vs_ZH6_S3;ZH16_S4_vs_ZH6_S4	--	--	0	0	0.504217	0	19.3042	20.7042	9.35156	4.95019
Novel03247	ZH16_S1_vs_ZH6_S1;ZH16_S2_vs_ZH6_S2;ZH16_S3_vs_ZH6_S3;ZH16_S4_vs_ZH6_S4	--	--	0	0	0.592916	0	5.29389	8.19953	9.01686	10.4364
Novel02354	ZH16_S1_vs_ZH6_S1;ZH16_S2_vs_ZH6_S2;ZH16_S3_vs_ZH6_S3;ZH16_S4_vs_ZH6_S4	--	--	0	0	0.115116	0	1.32005	6.08371	3.71158	2.52242
arahy.40ZGST	ZH16_S1_vs_ZH6_S1;ZH16_S2_vs_ZH6_S2;ZH16_S3_vs_ZH6_S3;ZH16_S4_vs_ZH6_S4	--	peroxidase 39-like [Glycine max]	0	0	0.199889	0	2.34523	5.22189	4.20213	3.34889
arahy.F45T9K	ZH16_S1_vs_ZH6_S1;ZH16_S2_vs_ZH6_S2;ZH16_S3_vs_ZH6_S3;ZH16_S4_vs_ZH6_S4	--	Polyketide cyclase/dehydrase and lipid transport superfamily protein	0.140093	0.538113	0.779478	0	20.9358	47.6563	34.4997	28.244
arahy.4QW6M0	ZH16_S1_vs_ZH6_S1;ZH16_S2_vs_ZH6_S2;ZH16_S3_vs_ZH6_S3;ZH16_S4_vs_ZH6_S4	--	tRNA N6-adenosine threonylcarbamoyltransferase n=4 Tax=Gluconobacter RepID=K7SI01_GLUOY	0.209063	0.413276	0.0592712	0.0209669	0.800237	1.62737	0.603799	0.476252
arahy.Z9T13B	ZH16_S1_vs_ZH6_S1;ZH16_S2_vs_ZH6_S2;ZH16_S3_vs_ZH6_S3;ZH16_S4_vs_ZH6_S4	IWS1	uncharacterized protein LOC100527694 isoform X1 [Glycine max]	0	0	0.0284544	0.0425601	0.803381	5.18509	3.10994	1.62901
Novel03548	ZH16_S1_vs_ZH6_S1;ZH16_S2_vs_ZH6_S2;ZH16_S3_vs_ZH6_S3;ZH16_S4_vs_ZH6_S4	--	--	0	0	0.0921701	0	1.62357	3.0432	1.32625	1.13665
Novel02206	ZH16_S1_vs_ZH6_S1;ZH16_S2_vs_ZH6_S2;ZH16_S3_vs_ZH6_S3;ZH16_S4_vs_ZH6_S4	--	--	0	0	0	0	1.66091	2.335	1.11846	0.632919
arahy.A8KD6A	ZH16_S1_vs_ZH6_S1;ZH16_S2_vs_ZH6_S2;ZH16_S3_vs_ZH6_S3;ZH16_S4_vs_ZH6_S4	M-type_MADS	30S ribosomal protein S13	0	0	0.425566	0	3.44762	6.10996	7.66061	6.28349
arahy.CXU7YK	ZH16_S1_vs_ZH6_S1;ZH16_S2_vs_ZH6_S2;ZH16_S3_vs_ZH6_S3;ZH16_S4_vs_ZH6_S4	--	uncharacterized protein LOC102664163 isoform X7 [Glycine max]	0.0229442	0.257404	0.105413	0	1.19041	3.18476	1.90154	2.14585
arahy.F7JNQF	ZH16_S1_vs_ZH6_S1;ZH16_S2_vs_ZH6_S2;ZH16_S3_vs_ZH6_S3;ZH16_S4_vs_ZH6_S4	--	ninja-family protein mc410	20.6839	12.8616	27.03	9.52641	81.1806	37.3962	64.1708	27.0971
arahy.C1D0JP	ZH16_S1_vs_ZH6_S1;ZH16_S2_vs_ZH6_S2;ZH16_S3_vs_ZH6_S3;ZH16_S4_vs_ZH6_S4	--	uncharacterized protein LOC100796572 [Glycine max]	0.354082	0.0545639	0.0174109	0.039063	5.02977	1.73656	0.910232	0.886753
arahy.1EL4AZ	ZH16_S1_vs_ZH6_S1;ZH16_S2_vs_ZH6_S2;ZH16_S3_vs_ZH6_S3;ZH16_S4_vs_ZH6_S4	--	copper amine oxidase 1-like [Glycine max]	0	0	0.266011	0	4.24189	7.78191	7.00508	5.61583
Novel03499	ZH16_S1_vs_ZH6_S1;ZH16_S2_vs_ZH6_S2;ZH16_S3_vs_ZH6_S3;ZH16_S4_vs_ZH6_S4	--	--	1.36207	6.87671	3.61435	4.34839	7.21352	39.3719	20.457	15.7026
arahy.7K8RK5	ZH16_S1_vs_ZH6_S1;ZH16_S2_vs_ZH6_S2;ZH16_S3_vs_ZH6_S3;ZH16_S4_vs_ZH6_S4	--	Prenylcysteine oxidase-like n=10 Tax=Eutheria RepID=PCYXL_MOUSE	3.87264	2.91041	3.57808	2.87848	8.23323	8.84638	8.78804	7.35798
Novel03256	ZH16_S1_vs_ZH6_S1;ZH16_S2_vs_ZH6_S2;ZH16_S3_vs_ZH6_S3;ZH16_S4_vs_ZH6_S4	--	PREDICTED: S-adenosylmethionine carrier 1, chloroplastic/mitochondrial [Pyrus x bretschneideri]	0.218415	0	0.0467013	0	5.37431	2.92563	1.68883	1.7244
arahy.AIN499	ZH16_S1_vs_ZH6_S1;ZH16_S2_vs_ZH6_S2;ZH16_S3_vs_ZH6_S3;ZH16_S4_vs_ZH6_S4	--	ATP-dependent chaperone ClpB	0.555519	16.4694	8.62308	4.59821	1.66426	36.9993	22.9435	10.9986
arahy.31BJ59	ZH16_S1_vs_ZH6_S1;ZH16_S2_vs_ZH6_S2;ZH16_S3_vs_ZH6_S3;ZH16_S4_vs_ZH6_S4	--	UDP-Glycosyltransferase superfamily protein	0.0203988	0.0302601	2.51798	0.6125	1.64179	9.67347	7.61026	2.48362
arahy.5E2VRE	ZH16_S1_vs_ZH6_S1;ZH16_S2_vs_ZH6_S2;ZH16_S3_vs_ZH6_S3;ZH16_S4_vs_ZH6_S4	--	Unknown protein	0	0	0.324252	0	5.98201	8.32911	4.27944	3.48319
arahy.I2W0HI	ZH16_S1_vs_ZH6_S1;ZH16_S2_vs_ZH6_S2;ZH16_S3_vs_ZH6_S3;ZH16_S4_vs_ZH6_S4	SBP	squamosa promoter-binding-like protein 12-like isoform X6 [Glycine max]	0	1.197	0.658702	0.805752	2.10981	8.8244	5.83036	4.42097
arahy.674JY7	ZH16_S1_vs_ZH6_S1;ZH16_S2_vs_ZH6_S2;ZH16_S3_vs_ZH6_S3;ZH16_S4_vs_ZH6_S4	G2-like	myb-like DNA-binding domain, shaqkyf class protein	0.581288	2.61471	1.32327	0.962082	4.0714	22.6744	19.7627	18.0698
arahy.F63DWU	ZH16_S1_vs_ZH6_S1;ZH16_S2_vs_ZH6_S2;ZH16_S3_vs_ZH6_S3;ZH16_S4_vs_ZH6_S4	--	3-oxoacyl-[acyl-carrier-protein] synthase 3 n=2 Tax=Synechococcus RepID=FABH_SYNPW	0	8.41415	1.36412	0.753814	10.2913	29.5644	28.1125	23.1178
Novel02968	ZH16_S1_vs_ZH6_S1;ZH16_S2_vs_ZH6_S2;ZH16_S3_vs_ZH6_S3;ZH16_S4_vs_ZH6_S4	--	hypothetical protein [Beta vulgaris subsp. vulgaris]	0.0145324	0.00970797	0.00828998	0	0.394152	1.16438	1.12049	0.877425
Novel03714	ZH16_S1_vs_ZH6_S1;ZH16_S2_vs_ZH6_S2;ZH16_S3_vs_ZH6_S3;ZH16_S4_vs_ZH6_S4	--	--	0	0	0.221132	0	0.995631	8.03157	5.89402	6.08299
Novel01639	ZH16_S1_vs_ZH6_S1;ZH16_S2_vs_ZH6_S2;ZH16_S3_vs_ZH6_S3;ZH16_S4_vs_ZH6_S4	--	Hypothetical protein glysoja_014211 [Glycine soja]	0.0303445	0.277227	0.07061	0	0.899864	6.6823	2.64241	2.39718
Novel02801	ZH16_S1_vs_ZH6_S1;ZH16_S2_vs_ZH6_S2;ZH16_S3_vs_ZH6_S3;ZH16_S4_vs_ZH6_S4	--	Protein disulfide isomerase L-2 [Medicago truncatula]>gi|355507444|gb|AES88586.1| protein disulfide isomerase-like protein [Medicago truncatula]	0	0	0.0952802	0.048574	2.04639	3.03842	5.80912	6.52863
Novel00820	ZH16_S1_vs_ZH6_S1;ZH16_S2_vs_ZH6_S2;ZH16_S3_vs_ZH6_S3;ZH16_S4_vs_ZH6_S4	--	PREDICTED: isovaleryl-CoA dehydrogenase, mitochondrial isoform X2 [Eucalyptus grandis]	0	0.0371401	0	0.056603	1.71639	2.51983	3.28128	2.21077
Novel04971	ZH16_S1_vs_ZH6_S1;ZH16_S2_vs_ZH6_S2;ZH16_S3_vs_ZH6_S3;ZH16_S4_vs_ZH6_S4	--	--	0	0	0.0658995	0	1.40273	2.80368	1.40347	0.814346
arahy.VNU8D4	ZH16_S1_vs_ZH6_S1;ZH16_S2_vs_ZH6_S2;ZH16_S3_vs_ZH6_S3;ZH16_S4_vs_ZH6_S4	--	acyl-peptide hydrolase-like protein	0	0	0.235289	0	2.06241	2.2471	3.68914	2.12569
Novel04152	ZH16_S1_vs_ZH6_S1;ZH16_S2_vs_ZH6_S2;ZH16_S3_vs_ZH6_S3;ZH16_S4_vs_ZH6_S4	--	PREDICTED: pentatricopeptide repeat-containing protein At4g17616 [Cicer arietinum]>gi|828326169|ref|XP_012573638.1| PREDICTED: pentatricopeptide repeat-containing protein At4g17616 [Cicer arietinum]	0	0	0	0	1.10461	1.83289	1.25873	0.968873
Novel01187	ZH16_S1_vs_ZH6_S1;ZH16_S2_vs_ZH6_S2;ZH16_S3_vs_ZH6_S3;ZH16_S4_vs_ZH6_S4	--	--	0.0477028	0.102703	0.119249	0	1.51144	7.78044	4.82464	3.21761
Novel02697	ZH16_S1_vs_ZH6_S1;ZH16_S2_vs_ZH6_S2;ZH16_S3_vs_ZH6_S3;ZH16_S4_vs_ZH6_S4	--	PREDICTED: putative ribonuclease H protein At1g65750 [Brassica rapa]	0	0.109002	0	0	0.827913	2.81716	1.27003	1.72759
arahy.F8YVUF	ZH16_S1_vs_ZH6_S1;ZH16_S2_vs_ZH6_S2;ZH16_S3_vs_ZH6_S3;ZH16_S4_vs_ZH6_S4	--	coenzyme Q-binding protein COQ10 homolog B, mitochondrial isoform X1 [Glycine max]	0	0	0	0.0897351	6.38361	6.51329	7.78117	8.70195
arahy.2I20T3	ZH16_S1_vs_ZH6_S1;ZH16_S2_vs_ZH6_S2;ZH16_S3_vs_ZH6_S3;ZH16_S4_vs_ZH6_S4	--	anthranilate synthase component II	0	0.0911133	0	0	3.08519	5.76754	6.03767	5.8749
arahy.Q46SAL	ZH16_S1_vs_ZH6_S1;ZH16_S2_vs_ZH6_S2;ZH16_S3_vs_ZH6_S3;ZH16_S4_vs_ZH6_S4	--	uncharacterized protein LOC100803312 isoform X1 [Glycine max]	0	0	0.617399	0	9.78226	24.2556	23.1853	18.3546
arahy.MG8XGW	ZH16_S1_vs_ZH6_S1;ZH16_S2_vs_ZH6_S2;ZH16_S3_vs_ZH6_S3;ZH16_S4_vs_ZH6_S4	--	putative disease resistance protein At3g14460-like isoform X2 [Glycine max]	0	0	0	0	1.76146	6.13281	2.76698	1.33091
Novel01184	ZH16_S1_vs_ZH6_S1;ZH16_S2_vs_ZH6_S2;ZH16_S3_vs_ZH6_S3;ZH16_S4_vs_ZH6_S4	--	PREDICTED: ALG-2 interacting protein X [Jatropha curcas]>gi|643726178|gb|KDP34986.1| hypothetical protein JCGZ_09274 [Jatropha curcas]	0	0.049447	0.824861	0.0753593	10.3363	30.2052	19.5301	19.1268
Novel02927	ZH16_S1_vs_ZH6_S1;ZH16_S2_vs_ZH6_S2;ZH16_S3_vs_ZH6_S3;ZH16_S4_vs_ZH6_S4	--	PREDICTED: uncharacterized protein LOC104885230 [Beta vulgaris subsp. vulgaris]	0	0.0514522	0.0429695	0	2.23545	3.2101	2.00621	1.72853
Novel03779	ZH16_S1_vs_ZH6_S1;ZH16_S2_vs_ZH6_S2;ZH16_S3_vs_ZH6_S3;ZH16_S4_vs_ZH6_S4	--	--	0	0.277954	1.03748	0.171331	18.2636	10.1998	27.2714	15.868
Novel03722	ZH16_S1_vs_ZH6_S1;ZH16_S2_vs_ZH6_S2;ZH16_S3_vs_ZH6_S3;ZH16_S4_vs_ZH6_S4	--	--	0	0.0428999	0.151548	0	2.5987	12.5391	9.72231	9.04559
Novel01491	ZH16_S1_vs_ZH6_S1;ZH16_S2_vs_ZH6_S2;ZH16_S3_vs_ZH6_S3;ZH16_S4_vs_ZH6_S4	--	--	0	0	0.208116	0	0.530804	8.6066	3.88667	3.8516
arahy.Y1V5M8	ZH16_S1_vs_ZH6_S1;ZH16_S2_vs_ZH6_S2;ZH16_S3_vs_ZH6_S3;ZH16_S4_vs_ZH6_S4	--	Unknown protein	0	0	0.111839	0	2.73812	8.47814	5.07902	5.18603
Novel03523	ZH16_S1_vs_ZH6_S1;ZH16_S2_vs_ZH6_S2;ZH16_S3_vs_ZH6_S3;ZH16_S4_vs_ZH6_S4	--	--	0.0989893	0.426244	3.17299	0.435511	19.5716	63.7831	32.8866	27.904
Novel01738	ZH16_S1_vs_ZH6_S1;ZH16_S2_vs_ZH6_S2;ZH16_S3_vs_ZH6_S3;ZH16_S4_vs_ZH6_S4	--	PREDICTED: uncharacterized protein LOC100810148 isoform X5 [Glycine max]	0.223289	0	0.414476	0	11.2468	12.2315	12.8504	11.534
arahy.H7HP3B	ZH16_S1_vs_ZH6_S1;ZH16_S2_vs_ZH6_S2;ZH16_S3_vs_ZH6_S3;ZH16_S4_vs_ZH6_S4	--	mitochondrial phosphate carrier protein 3, mitochondrial-like [Glycine max]	9.9882	4.11283	2.08102	1.38732	201.489	54.6272	11.4152	6.5855
Novel03058	ZH16_S1_vs_ZH6_S1;ZH16_S2_vs_ZH6_S2;ZH16_S3_vs_ZH6_S3;ZH16_S4_vs_ZH6_S4	--	PREDICTED: putative ribonuclease H protein At1g65750 [Brassica rapa]	0	0.146218	0.237685	0.0294	3.22412	4.10368	5.33502	3.64283
Novel01599	ZH16_S1_vs_ZH6_S1;ZH16_S2_vs_ZH6_S2;ZH16_S3_vs_ZH6_S3;ZH16_S4_vs_ZH6_S4	--	--	0.182593	0.0732137	5.49292	0.111581	6.87073	24.7222	19.1603	13.4515
Novel05050	ZH16_S1_vs_ZH6_S1;ZH16_S2_vs_ZH6_S2;ZH16_S3_vs_ZH6_S3;ZH16_S4_vs_ZH6_S4	--	hypothetical protein PHAVU_011G017400g [Phaseolus vulgaris]>gi|561004484|gb|ESW03478.1| hypothetical protein PHAVU_011G017400g [Phaseolus vulgaris]	0.0410891	0.0542011	0.0446471	0	0.986843	5.88418	2.9999	3.1869
Novel02270	ZH16_S1_vs_ZH6_S1;ZH16_S2_vs_ZH6_S2;ZH16_S3_vs_ZH6_S3;ZH16_S4_vs_ZH6_S4	--	--	0	0	0.216119	0	2.52458	9.78626	8.01945	4.73601
Novel03315	ZH16_S1_vs_ZH6_S1;ZH16_S2_vs_ZH6_S2;ZH16_S3_vs_ZH6_S3;ZH16_S4_vs_ZH6_S4	--	--	0	0	0.490659	0	1.0216	4.49581	4.82681	2.77291
Novel04289	ZH16_S1_vs_ZH6_S1;ZH16_S2_vs_ZH6_S2;ZH16_S3_vs_ZH6_S3;ZH16_S4_vs_ZH6_S4	--	--	0.0492928	0.0731224	0.229416	0	1.91095	9.41131	10.7491	9.05495
arahy.JNHH0Q	ZH16_S1_vs_ZH6_S1;ZH16_S2_vs_ZH6_S2;ZH16_S3_vs_ZH6_S3;ZH16_S4_vs_ZH6_S4	--	RabGAP/TBC domain-containing protein	0	0.156384	0.313426	0	9.22061	27.9216	20.8408	16.1368
Novel01222	ZH16_S1_vs_ZH6_S1;ZH16_S2_vs_ZH6_S2;ZH16_S3_vs_ZH6_S3;ZH16_S4_vs_ZH6_S4	WRKY	WRKY29 [Glycine max]	0.114375	0.879238	0.846972	0.364185	3.81691	31.7422	28.9195	26.0452
arahy.6QNX53	ZH16_S1_vs_ZH6_S1;ZH16_S2_vs_ZH6_S2;ZH16_S3_vs_ZH6_S3;ZH16_S4_vs_ZH6_S4	--	trypsin family protein	1.63607	6.31551	3.53951	2.80309	4.80448	28.4886	12.7686	7.82655
arahy.7P1BGF	ZH16_S1_vs_ZH6_S1;ZH16_S2_vs_ZH6_S2;ZH16_S3_vs_ZH6_S3;ZH16_S4_vs_ZH6_S4	--	Dehydrogenase/reductase SDR family member n=3 Tax=Papilionoideae RepID=G7JKG6_MEDTR	0	0.215442	0.104051	0	3.08253	6.03393	3.73771	4.67508
Novel00252	ZH16_S1_vs_ZH6_S1;ZH16_S2_vs_ZH6_S2;ZH16_S3_vs_ZH6_S3;ZH16_S4_vs_ZH6_S4	--	PREDICTED: uncharacterized protein LOC103936764 [Pyrus x bretschneideri]	0.0879621	0.0816119	0.193054	0.0156439	8.80683	8.38378	3.96109	1.81502
Novel02695	ZH16_S1_vs_ZH6_S1;ZH16_S2_vs_ZH6_S2;ZH16_S3_vs_ZH6_S3;ZH16_S4_vs_ZH6_S4	--	--	0	0	0.106486	0	0.895496	2.88696	0.932033	0.803759
arahy.UE0WIX	ZH16_S1_vs_ZH6_S1;ZH16_S2_vs_ZH6_S2;ZH16_S3_vs_ZH6_S3;ZH16_S4_vs_ZH6_S4	--	myosin 1	0	0.0694836	0.0707988	0	0.566674	7.0665	5.40373	3.68006
Novel04920	ZH16_S1_vs_ZH6_S1;ZH16_S2_vs_ZH6_S2;ZH16_S3_vs_ZH6_S3;ZH16_S4_vs_ZH6_S4	--	--	0	0	0.217643	0.0349695	2.06638	11.3803	6.71885	5.57789
Novel03205	ZH16_S1_vs_ZH6_S1;ZH16_S2_vs_ZH6_S2;ZH16_S3_vs_ZH6_S3;ZH16_S4_vs_ZH6_S4	--	--	0.0347238	0	0.0851199	0	5.87882	13.9921	6.21763	3.54557
arahy.IBJJ46	ZH16_S1_vs_ZH6_S1;ZH16_S2_vs_ZH6_S2;ZH16_S3_vs_ZH6_S3;ZH16_S4_vs_ZH6_S4	--	MATE efflux family protein	0.0653466	0.508671	0.679735	1.22586	1.83581	3.07872	3.38896	5.23659
Novel04951	ZH16_S1_vs_ZH6_S1;ZH16_S2_vs_ZH6_S2;ZH16_S3_vs_ZH6_S3;ZH16_S4_vs_ZH6_S4	--	--	0.0258222	0	0.0487266	0	1.68004	5.53833	0.835963	0.905965
Novel04900	ZH16_S1_vs_ZH6_S1;ZH16_S2_vs_ZH6_S2;ZH16_S3_vs_ZH6_S3;ZH16_S4_vs_ZH6_S4	--	--	0	0.0314277	0.0653123	0	1.23152	2.41728	2.14077	1.91598
Novel02825	ZH16_S1_vs_ZH6_S1;ZH16_S2_vs_ZH6_S2;ZH16_S3_vs_ZH6_S3;ZH16_S4_vs_ZH6_S4	--	AMP deaminase, putative [Ricinus communis]>gi|223528207|gb|EEF30266.1| AMP deaminase, putative [Ricinus communis]	0	0.0739203	0.0804377	0.0684698	1.54128	7.07624	4.43843	2.82715
Novel03737	ZH16_S1_vs_ZH6_S1;ZH16_S2_vs_ZH6_S2;ZH16_S3_vs_ZH6_S3;ZH16_S4_vs_ZH6_S4	--	hypothetical protein [Beta vulgaris subsp. vulgaris]	0	0	0.0219792	0	0.155389	1.81666	1.10504	2.58951
Novel01678	ZH16_S1_vs_ZH6_S1;ZH16_S2_vs_ZH6_S2;ZH16_S3_vs_ZH6_S3;ZH16_S4_vs_ZH6_S4	--	PREDICTED: nuclear-pore anchor-like [Glycine max]	0	0	0.201042	0	3.47572	11.426	6.59655	5.89299
Novel04935	ZH16_S1_vs_ZH6_S1;ZH16_S2_vs_ZH6_S2;ZH16_S3_vs_ZH6_S3;ZH16_S4_vs_ZH6_S4	--	hypothetical protein PHAVU_003G269400g [Phaseolus vulgaris]>gi|561029586|gb|ESW28226.1| hypothetical protein PHAVU_003G269400g [Phaseolus vulgaris]	0.0299718	0	0.293267	0.0291634	2.69194	17.4321	14.0124	12.1249
arahy.K7VGHR	ZH16_S1_vs_ZH6_S1;ZH16_S2_vs_ZH6_S2;ZH16_S3_vs_ZH6_S3;ZH16_S4_vs_ZH6_S4	--	putative cyclic nucleotide-gated ion channel 15-like [Glycine max]	0	0.345983	1.01875	0	13.5127	41.1744	19.9072	31.1813
Novel04373	ZH16_S1_vs_ZH6_S1;ZH16_S2_vs_ZH6_S2;ZH16_S3_vs_ZH6_S3;ZH16_S4_vs_ZH6_S4	--	--	0	0	0.149643	0.0631187	1.27221	4.32813	4.12022	1.53646
Novel04070	ZH16_S1_vs_ZH6_S1;ZH16_S2_vs_ZH6_S2;ZH16_S3_vs_ZH6_S3;ZH16_S4_vs_ZH6_S4	--	PREDICTED: uncharacterized protein LOC102667581 [Glycine max]	0.315179	0.183952	0.158511	0	2.01522	2.38639	2.39504	0.621891
Novel02163	ZH16_S1_vs_ZH6_S1;ZH16_S2_vs_ZH6_S2;ZH16_S3_vs_ZH6_S3;ZH16_S4_vs_ZH6_S4	--	--	0	0	0.281658	0.0440711	1.32782	4.27311	4.11127	2.40786
Novel03336	ZH16_S1_vs_ZH6_S1;ZH16_S2_vs_ZH6_S2;ZH16_S3_vs_ZH6_S3;ZH16_S4_vs_ZH6_S4	--	PREDICTED: LYR motif-containing protein 4 [Nelumbo nucifera]	6.60723	27.7329	12.8019	7.99723	13.7403	54.7125	32.1106	20.9988
arahy.DP3C2W	ZH16_S1_vs_ZH6_S1;ZH16_S2_vs_ZH6_S2;ZH16_S3_vs_ZH6_S3;ZH16_S4_vs_ZH6_S4	--	serine/threonine protein phosphatase 2A	0.249895	0.242482	0.356684	0.138384	2.20566	1.1401	1.88777	1.31681
Novel02853	ZH16_S1_vs_ZH6_S1;ZH16_S2_vs_ZH6_S2;ZH16_S3_vs_ZH6_S3;ZH16_S4_vs_ZH6_S4	--	Myosin-J heavy chain [Glycine soja]	0	0.0756314	0.0241334	0	0.764719	2.99098	3.0245	1.56529
arahy.JA6QTX	ZH16_S1_vs_ZH6_S1;ZH16_S2_vs_ZH6_S2;ZH16_S3_vs_ZH6_S3;ZH16_S4_vs_ZH6_S4	--	Far upstream element-binding protein n=1 Tax=Medicago truncatula RepID=G7K7W5_MEDTR	0	0	0	0	0.931697	1.59784	0.836135	1.00822
Novel01700	ZH16_S1_vs_ZH6_S1;ZH16_S2_vs_ZH6_S2;ZH16_S3_vs_ZH6_S3;ZH16_S4_vs_ZH6_S4	--	hypothetical protein B456_002G103400 [Gossypium raimondii]	0	0	0.197112	0	0.828746	3.97711	2.76422	1.6726
arahy.9A92AA	ZH16_S1_vs_ZH6_S1;ZH16_S2_vs_ZH6_S2;ZH16_S3_vs_ZH6_S3;ZH16_S4_vs_ZH6_S4	SNF2	DNA binding,ATP binding,nucleic acid bindin isoform 2 n=1 Tax=Theobroma cacao RepID=UPI00042B44E2	0	0	0.17674	0.025027	4.18853	8.04455	6.65689	4.48124
Novel04388	ZH16_S1_vs_ZH6_S1;ZH16_S2_vs_ZH6_S2;ZH16_S3_vs_ZH6_S3;ZH16_S4_vs_ZH6_S4	--	PREDICTED: DEAD-box ATP-dependent RNA helicase 28-like [Glycine max]	0	0	0.225452	0	0.690654	2.275	1.81095	1.37104
arahy.2AZ3KM	ZH16_S1_vs_ZH6_S1;ZH16_S2_vs_ZH6_S2;ZH16_S3_vs_ZH6_S3;ZH16_S4_vs_ZH6_S4	--	putative cyclic nucleotide-gated ion channel 15-like isoform X3 [Glycine max]	0	0	0.339446	0	3.87511	18.3267	9.041	10.1106
Novel01439	ZH16_S1_vs_ZH6_S1;ZH16_S2_vs_ZH6_S2;ZH16_S3_vs_ZH6_S3;ZH16_S4_vs_ZH6_S4	--	PREDICTED: uncharacterized protein LOC101501792 [Cicer arietinum]	0.0105449	0	0.0952101	0	0.391067	2.71539	2.31979	1.64304
arahy.TDU0QQ	ZH16_S1_vs_ZH6_S1;ZH16_S2_vs_ZH6_S2;ZH16_S3_vs_ZH6_S3;ZH16_S4_vs_ZH6_S4	--	ATP binding microtubule motor family protein	0	0.210822	0.09515	0	1.3492	5.9186	4.26384	3.48655
Novel02202	ZH16_S1_vs_ZH6_S1;ZH16_S2_vs_ZH6_S2;ZH16_S3_vs_ZH6_S3;ZH16_S4_vs_ZH6_S4	--	--	0	0	0.365279	0	1.9668	6.81314	4.21487	3.20484
arahy.68E5M7	ZH16_S1_vs_ZH6_S1;ZH16_S2_vs_ZH6_S2;ZH16_S3_vs_ZH6_S3;ZH16_S4_vs_ZH6_S4	--	glutamine-dependent NAD(+) synthetase, putative	0.492333	1.2154	3.3274	0.362507	4.9803	12.5147	6.90975	4.10482
arahy.281UCZ	ZH16_S1_vs_ZH6_S1;ZH16_S2_vs_ZH6_S2;ZH16_S4_vs_ZH6_S4	--	arginine/serine-rich coiled coil protein	0	0	6.57077	0.295915	2.10024	15.7449	18.6183	15.9567
arahy.Z7TJ7F	ZH16_S2_vs_ZH6_S2;ZH16_S3_vs_ZH6_S3;ZH16_S4_vs_ZH6_S4	--	Unknown protein	23.8727	27.5193	34.8564	37.4495	29.7852	92.4511	91.8862	145.608
Novel04646	ZH16_S1_vs_ZH6_S1;ZH16_S2_vs_ZH6_S2;ZH16_S4_vs_ZH6_S4	--	hypothetical protein PRUPE_ppa024472mg, partial [Prunus persica]>gi|462403441|gb|EMJ08998.1| hypothetical protein PRUPE_ppa024472mg, partial [Prunus persica]	0	0	0.0453246	0	1.88321	2.2317	0.624724	0.500989
Novel03793	ZH16_S1_vs_ZH6_S1;ZH16_S2_vs_ZH6_S2;ZH16_S4_vs_ZH6_S4	--	PREDICTED: vacuolar protein sorting-associated protein 35A-like [Pyrus x bretschneideri]	1.57773	1.46114	6.08385	1.71159	3.44641	15.1502	10.9038	9.76938
Novel02945	ZH16_S1_vs_ZH6_S1;ZH16_S2_vs_ZH6_S2;ZH16_S4_vs_ZH6_S4	--	--	0.191403	1.39291	2.57749	1.69289	0.684283	4.00332	4.64881	4.99294
Novel04549	ZH16_S1_vs_ZH6_S1;ZH16_S2_vs_ZH6_S2;ZH16_S3_vs_ZH6_S3	--	PREDICTED: uncharacterized protein LOC105950272 [Erythranthe guttatus]	0	0	0	0	0.103495	0.212151	0.162922	0.0844244
arahy.Y2W1T6	ZH16_S2_vs_ZH6_S2;ZH16_S3_vs_ZH6_S3;ZH16_S4_vs_ZH6_S4	--	EIN3-binding F box protein 1	27.6714	1.2224	4.01344	0.678531	27.4076	3.25298	8.87953	1.63746
arahy.YE4ZXC	ZH16_S1_vs_ZH6_S1;ZH16_S3_vs_ZH6_S3;ZH16_S4_vs_ZH6_S4	--	glucan endo-1,3-beta-D-glucosidase-like [Glycine max]	8.2899	8.30473	3.52552	0.503656	23.4124	7.96688	13.0182	2.17148
arahy.02L9SB	ZH16_S2_vs_ZH6_S2;ZH16_S3_vs_ZH6_S3;ZH16_S4_vs_ZH6_S4	--	Protein of unknown function (DUF789)	3.08186	2.8867	7.1141	5.49406	1.59168	8.30048	15.1141	11.7575
arahy.0034KJ	ZH16_S2_vs_ZH6_S2;ZH16_S3_vs_ZH6_S3;ZH16_S4_vs_ZH6_S4	--	S-adenosylmethionine decarboxylase	301.018	18.0342	5.62895	3.87159	374.746	38.2787	14.1228	11.1853
Novel02112	ZH16_S1_vs_ZH6_S1;ZH16_S2_vs_ZH6_S2;ZH16_S3_vs_ZH6_S3	--	--	0	0	0	0	0.565198	3.90436	0.964008	0.0932614
Novel02889	ZH16_S2_vs_ZH6_S2;ZH16_S3_vs_ZH6_S3;ZH16_S4_vs_ZH6_S4	--	--	0.556424	0.648718	0.197479	0	1.81636	2.81346	1.81269	1.17613
Novel03300	ZH16_S2_vs_ZH6_S2;ZH16_S3_vs_ZH6_S3;ZH16_S4_vs_ZH6_S4	--	--	0	0	0	0	0.253056	4.74123	2.17029	1.7899
arahy.3ZRX2Z	ZH16_S2_vs_ZH6_S2;ZH16_S3_vs_ZH6_S3;ZH16_S4_vs_ZH6_S4	--	recQ-mediated genome instability-like protein	1.68166	1.33	0.249028	0	3.51672	10.6192	10.7301	7.0162
arahy.IT1GAM	ZH16_S2_vs_ZH6_S2;ZH16_S3_vs_ZH6_S3;ZH16_S4_vs_ZH6_S4	--	sodium hydrogen exchanger 2	1.3194	1.85861	1.21213	1.26171	4.29883	15.2645	11.8212	8.93252
arahy.J3LTHX	ZH16_S2_vs_ZH6_S2;ZH16_S3_vs_ZH6_S3;ZH16_S4_vs_ZH6_S4	--	protein RIK-like isoform X1 [Glycine max]	5.3292	15.9598	8.04251	7.29134	9.82695	32.0552	22.4129	19.8588
arahy.L81BKS	ZH16_S1_vs_ZH6_S1;ZH16_S2_vs_ZH6_S2;ZH16_S3_vs_ZH6_S3	--	threonine aldolase 1	0.257264	2.33388	1.14149	0.35628	2.21444	7.89796	4.22144	1.04571
arahy.FZWY62	ZH16_S1_vs_ZH6_S1;ZH16_S2_vs_ZH6_S2;ZH16_S4_vs_ZH6_S4	--	disease resistance protein	1.13529	0.979356	0.642153	0.420205	2.69618	1.92444	1.12042	1.09762
arahy.Y12L7W	ZH16_S1_vs_ZH6_S1;ZH16_S2_vs_ZH6_S2;ZH16_S4_vs_ZH6_S4	--	Unknown protein	1.12485	3.82214	4.69863	0.873908	3.83229	10.9103	6.81238	4.18535
arahy.00BQAA	ZH16_S2_vs_ZH6_S2;ZH16_S3_vs_ZH6_S3;ZH16_S4_vs_ZH6_S4	B3	plant-specific B3-DNA-binding domain protein	0.0479186	0.0424091	0.0531259	0	0.601898	2.90101	3.90526	2.56121
arahy.DZ80JJ	ZH16_S1_vs_ZH6_S1;ZH16_S3_vs_ZH6_S3;ZH16_S4_vs_ZH6_S4	--	O-methyltransferase 1	0.344197	0.0692784	1.09599	1.50306	1.25556	0.376334	6.17206	5.30407
arahy.JQA4UT	ZH16_S1_vs_ZH6_S1;ZH16_S2_vs_ZH6_S2;ZH16_S4_vs_ZH6_S4	--	Pentatricopeptide repeat (PPR) superfamily protein	0.0439491	0.203459	0.597444	0.106043	0.638313	1.37066	0.998132	0.828556
arahy.QMCC06	ZH16_S1_vs_ZH6_S1;ZH16_S2_vs_ZH6_S2;ZH16_S4_vs_ZH6_S4	--	blue copper protein-like [Glycine max]	0	3.16666	1.64057	0	2.60957	24.1703	3.60306	0.927082
arahy.RYFJ47	ZH16_S1_vs_ZH6_S1;ZH16_S2_vs_ZH6_S2;ZH16_S3_vs_ZH6_S3	Orphans	zinc finger protein CONSTANS-like [Glycine max]	0.266641	2.15102	33.4843	3.12901	1.61324	5.33708	94.9038	6.14186
Novel03334	ZH16_S2_vs_ZH6_S2;ZH16_S3_vs_ZH6_S3;ZH16_S4_vs_ZH6_S4	--	unknown [Lotus japonicus]	4.84196	5.79322	2.7637	2.36421	7.59229	12.6194	7.44291	8.21713
arahy.7T1A8K	ZH16_S1_vs_ZH6_S1;ZH16_S2_vs_ZH6_S2;ZH16_S4_vs_ZH6_S4	--	villin-4-like isoform X8 [Glycine max]	0.112538	0	1.03826	0	9.54809	6.10694	3.37551	1.7747
arahy.SCHW0S	ZH16_S1_vs_ZH6_S1;ZH16_S3_vs_ZH6_S3;ZH16_S4_vs_ZH6_S4	--	delta-1-pyrroline-5-carboxylate synthetase	2.06332	24.011	8.59373	10.4911	10.2661	30.8404	30.2292	24.0733
arahy.X8LN02	ZH16_S2_vs_ZH6_S2;ZH16_S3_vs_ZH6_S3;ZH16_S4_vs_ZH6_S4	--	Unknown protein	1.10094	1.75461	1.12043	0.776089	3.09429	9.5261	10.1687	12.1528
arahy.55VZFW	ZH16_S1_vs_ZH6_S1;ZH16_S2_vs_ZH6_S2;ZH16_S4_vs_ZH6_S4	--	glutamine-fructose-6-phosphate transaminase (isomerizing)s	2.0902	1.84007	1.78396	0.910708	12.4599	8.24443	3.55004	2.53515
Novel03598	ZH16_S1_vs_ZH6_S1;ZH16_S2_vs_ZH6_S2;ZH16_S3_vs_ZH6_S3	--	PREDICTED: putative ribonuclease H protein At1g65750-like [Citrus sinensis]	0	0	0	0	2.61205	1.71897	1.36254	0.900548
arahy.76S2NJ	ZH16_S1_vs_ZH6_S1;ZH16_S2_vs_ZH6_S2;ZH16_S4_vs_ZH6_S4	--	microtubule-associated protein futsch isoform X1 [Glycine max]	1.08338	0.984428	7.05646	0.0243047	33.3982	13.7784	11.0845	13.1225
arahy.Q9XEDT	ZH16_S1_vs_ZH6_S1;ZH16_S2_vs_ZH6_S2;ZH16_S4_vs_ZH6_S4	--	epoxide hydrolase	7.53358	2.90267	18.2605	9.32029	16.4534	8.16966	19.3581	19.8442
Novel04433	ZH16_S1_vs_ZH6_S1;ZH16_S2_vs_ZH6_S2;ZH16_S4_vs_ZH6_S4	--	--	0.110187	0	4.9516	0	1.48418	17.7929	8.7826	8.4814
Novel03223	ZH16_S1_vs_ZH6_S1;ZH16_S2_vs_ZH6_S2;ZH16_S4_vs_ZH6_S4	--	--	0.18208	0.298083	6.55907	0	3.34948	25.1969	11.0007	8.31044
arahy.U7JD1F	ZH16_S2_vs_ZH6_S2;ZH16_S3_vs_ZH6_S3;ZH16_S4_vs_ZH6_S4	--	zinc induced facilitator-like 2	0	0	0.0217288	0	0.20136	9.67003	2.24822	1.04297
arahy.V6I7WA	ZH16_S1_vs_ZH6_S1;ZH16_S2_vs_ZH6_S2;ZH16_S3_vs_ZH6_S3	--	LRR and NB-ARC domain disease resistance protein	0.187306	0.0480819	0	0.0668233	1.26457	2.02067	0.410974	0.398855
arahy.ZDA2WA	ZH16_S2_vs_ZH6_S2;ZH16_S3_vs_ZH6_S3;ZH16_S4_vs_ZH6_S4	--	Dehydrogenase/reductase SDR family member n=3 Tax=Papilionoideae RepID=G7JKG6_MEDTR	0	0	0	0	1.21812	12.3766	7.35882	6.60071
Novel00670	ZH16_S2_vs_ZH6_S2;ZH16_S3_vs_ZH6_S3;ZH16_S4_vs_ZH6_S4	--	--	0	0.0348829	0.353907	0.0515172	0.0894924	5.27026	7.31438	3.12473
Novel04962	ZH16_S1_vs_ZH6_S1;ZH16_S2_vs_ZH6_S2;ZH16_S4_vs_ZH6_S4	--	hypothetical protein [Beta vulgaris subsp. vulgaris]	0.529176	0.656213	1.48279	0	3.06877	5.08684	1.94225	3.21232
Novel03368	ZH16_S1_vs_ZH6_S1;ZH16_S2_vs_ZH6_S2;ZH16_S4_vs_ZH6_S4	--	Calmodulin-interacting protein 111 [Glycine soja]	0.10428	0.390644	1.20608	0	0.549378	3.67182	2.83258	2.91619
arahy.1I1C4M	ZH16_S1_vs_ZH6_S1;ZH16_S2_vs_ZH6_S2;ZH16_S4_vs_ZH6_S4	--	Pentatricopeptide repeat (PPR) superfamily protein	1.20291	9.27575	5.29496	2.80252	2.87104	19.297	10.0194	6.6352
Novel04581	ZH16_S1_vs_ZH6_S1;ZH16_S2_vs_ZH6_S2;ZH16_S4_vs_ZH6_S4	--	PREDICTED: uncharacterized protein LOC100805066 isoform X1 [Glycine max]>gi|571493192|ref|XP_006592469.1| PREDICTED: uncharacterized protein LOC100805066 isoform X2 [Glycine max]>gi|571493195|ref|XP_006592470.1| PREDICTED: uncharacterized protein LOC100805066 isoform X3 [Glycine max]>gi|571493197|ref|XP_006592471.1| PREDICTED: uncharacterized protein LOC100805066 isoform X4 [Glycine max]	0.0517025	0.0578916	1.05693	0	2.20726	6.8685	3.42763	2.09618
arahy.HB635G	ZH16_S2_vs_ZH6_S2;ZH16_S3_vs_ZH6_S3;ZH16_S4_vs_ZH6_S4	--	protein COBRA-like [Glycine max]	82.5152	29.2889	16.1852	10.6684	155.306	62.6183	34.9226	29.8903
arahy.Z3AX4S	ZH16_S1_vs_ZH6_S1;ZH16_S2_vs_ZH6_S2;ZH16_S3_vs_ZH6_S3	--	Unknown protein	0.0750034	0	0.191134	0	2.30497	1.894	3.90171	0.365854
arahy.BZE4S9	ZH16_S1_vs_ZH6_S1;ZH16_S2_vs_ZH6_S2;ZH16_S4_vs_ZH6_S4	--	tRNA wybutosine-synthesizing protein 1 homolog [Glycine max]	0	0	0.0663289	0	0.84248	1.14426	0.67569	0.70276
arahy.JNCQ1V	ZH16_S2_vs_ZH6_S2;ZH16_S3_vs_ZH6_S3;ZH16_S4_vs_ZH6_S4	--	cell division cycle protein 27 homolog B-like isoform X1 [Glycine max]	3.40158	8.31041	4.92631	2.87269	5.58972	17.3732	10.6382	8.44924
Novel04312	ZH16_S2_vs_ZH6_S2;ZH16_S3_vs_ZH6_S3;ZH16_S4_vs_ZH6_S4	--	hypothetical protein PHAVU_008G170800g [Phaseolus vulgaris]>gi|561014273|gb|ESW13134.1| hypothetical protein PHAVU_008G170800g [Phaseolus vulgaris]	0	0	0.0987624	0	0.249346	3.90554	2.82267	2.57951
Novel04435	ZH16_S1_vs_ZH6_S1;ZH16_S2_vs_ZH6_S2;ZH16_S4_vs_ZH6_S4	--	--	0	0	1.03539	0	1.71942	5.1524	2.71552	1.33568
arahy.PYJ9JQ	ZH16_S2_vs_ZH6_S2;ZH16_S3_vs_ZH6_S3;ZH16_S4_vs_ZH6_S4	--	N(6)-adenine-specific DNA methyltransferase 2-like [Glycine max]	0	0	0	0	0.585764	4.33192	3.27951	2.99875
arahy.JHVF0I	ZH16_S2_vs_ZH6_S2;ZH16_S3_vs_ZH6_S3;ZH16_S4_vs_ZH6_S4	--	Myosin heavy chain-related protein	0	0	0	0.0619807	0.336935	5.44718	2.68722	2.17847
arahy.7JS874	ZH16_S2_vs_ZH6_S2;ZH16_S3_vs_ZH6_S3;ZH16_S4_vs_ZH6_S4	--	ABC transporter A family member 1-like isoform X3 [Glycine max]	0	0	0.0589292	0	0.479152	6.24515	4.89491	3.64311
Novel03458	ZH16_S1_vs_ZH6_S1;ZH16_S2_vs_ZH6_S2;ZH16_S4_vs_ZH6_S4	--	--	0.90068	2.0489	9.84338	1.96885	12.417	37.2816	22.9244	16.9368
arahy.LJQ8FI	ZH16_S2_vs_ZH6_S2;ZH16_S3_vs_ZH6_S3;ZH16_S4_vs_ZH6_S4	--	Unknown protein	0	0.0630516	0.0418307	0	0.0162401	1.15403	1.97904	1.62521
arahy.H71TAS	ZH16_S1_vs_ZH6_S1;ZH16_S2_vs_ZH6_S2;ZH16_S3_vs_ZH6_S3	--	calcium-dependent protein kinase 2	6.73715	11.1306	3.27815	5.26143	15.8574	26.0408	13.7974	9.02948
Novel00979	ZH16_S1_vs_ZH6_S1;ZH16_S2_vs_ZH6_S2;ZH16_S4_vs_ZH6_S4	--	--	0.0386616	1.05829	0.264375	0	0.840706	5.19372	1.41562	1.83617
arahy.B49C2G	ZH16_S2_vs_ZH6_S2;ZH16_S3_vs_ZH6_S3;ZH16_S4_vs_ZH6_S4	--	Aspartate-tRNA ligase or aspartyl tRNA synthetase n=1 Tax=Thalassiosira pseudonana RepID=B5YN18_THAPS	0	0	0	0	0.221565	2.18261	1.19745	2.02399
Novel04392	ZH16_S2_vs_ZH6_S2;ZH16_S3_vs_ZH6_S3;ZH16_S4_vs_ZH6_S4	--	Ribosomal RNA-processing protein 12, partial [Glycine soja]	0.031092	0.0971147	0.0749585	0	0.362266	2.10243	2.62399	2.77763
arahy.EE1ZRN	ZH16_S2_vs_ZH6_S2;ZH16_S3_vs_ZH6_S3;ZH16_S4_vs_ZH6_S4	--	BAG family molecular chaperone regulator 8, chloroplastic-like [Glycine max]	4.92656	12.891	7.14197	4.90521	6.6198	26.7174	17.5414	10.948
arahy.XQM4JL	ZH16_S2_vs_ZH6_S2;ZH16_S3_vs_ZH6_S3;ZH16_S4_vs_ZH6_S4	--	RNA polymerase II subunit A C-terminal domain phosphatase SSU72 n=8 Tax=Neopterygii RepID=SSU72_DANRE	3.23598	7.4774	6.60353	7.56106	5.34744	18.5108	15.0183	14.6159
Novel03573	ZH16_S1_vs_ZH6_S1;ZH16_S2_vs_ZH6_S2;ZH16_S3_vs_ZH6_S3	--	--	0	0	0	0	0.547046	1.54936	1.12575	0.312405
Novel04854	ZH16_S1_vs_ZH6_S1;ZH16_S2_vs_ZH6_S2;ZH16_S3_vs_ZH6_S3	--	--	0	0	0.193578	0	0.609184	3.70257	2.89573	0
arahy.UXSD6Z	ZH16_S1_vs_ZH6_S1;ZH16_S2_vs_ZH6_S2;ZH16_S3_vs_ZH6_S3	--	leguminosin group485 secreted peptide	48.9928	36.5355	7.45009	2.50944	366.94	177.371	29.2902	7.39389
arahy.907RVD	ZH16_S1_vs_ZH6_S1;ZH16_S2_vs_ZH6_S2;ZH16_S3_vs_ZH6_S3	--	Transducin/WD40 repeat-like superfamily protein	0.927114	3.70295	1.93279	2.10288	2.30822	7.57739	6.26526	3.48906
arahy.ZBAY9J	ZH16_S1_vs_ZH6_S1;ZH16_S3_vs_ZH6_S3;ZH16_S4_vs_ZH6_S4	HD-ZIP	DNA-binding protein n=1 Tax=Catharanthus roseus RepID=A1DR78_CATRO	8.42617	6.8125	3.4903	3.68093	20.3552	8.69114	9.27158	8.28438
Novel03717	ZH16_S1_vs_ZH6_S1;ZH16_S2_vs_ZH6_S2;ZH16_S4_vs_ZH6_S4	--	--	0	0	0.0993104	0	0.929193	2.29983	1.38346	1.8592
Novel01590	ZH16_S1_vs_ZH6_S1;ZH16_S2_vs_ZH6_S2;ZH16_S4_vs_ZH6_S4	--	--	0	0	1.0992	0	0.732221	4.38599	2.11383	1.95692
arahy.6AK6JC	ZH16_S1_vs_ZH6_S1;ZH16_S2_vs_ZH6_S2;ZH16_S4_vs_ZH6_S4	--	nudix hydrolase 10-like isoform X2 [Glycine max]	0.368975	0.331602	1.92647	0.108337	4.09645	7.04805	4.02021	5.41055
arahy.UI7C31	ZH16_S1_vs_ZH6_S1;ZH16_S3_vs_ZH6_S3;ZH16_S4_vs_ZH6_S4	--	calcium uptake protein 1, mitochondrial-like [Glycine max]	0.054453	1.77298	0.494913	0.220248	1.8653	3.67837	3.72577	2.05721
arahy.17Q9T0	ZH16_S2_vs_ZH6_S2;ZH16_S3_vs_ZH6_S3;ZH16_S4_vs_ZH6_S4	--	protein kinase family protein	0	0	0.0816278	0.0161796	0.0677442	0.243608	4.55569	6.48169
arahy.SGCE5I	ZH16_S2_vs_ZH6_S2;ZH16_S3_vs_ZH6_S3;ZH16_S4_vs_ZH6_S4	--	ATP binding/protein serine/threonine kinase [Glycine max]	3.33588	11.1415	6.32555	3.93734	5.57503	25.3315	15.9522	11.3577
arahy.L114HI	ZH16_S1_vs_ZH6_S1;ZH16_S3_vs_ZH6_S3;ZH16_S4_vs_ZH6_S4	--	3-isopropylmalate dehydratase, large subunit	2.34629	14.4697	5.76652	4.88758	9.06304	20.7695	13.8048	14.0247
arahy.UPVP39	ZH16_S1_vs_ZH6_S1;ZH16_S2_vs_ZH6_S2;ZH16_S4_vs_ZH6_S4	--	1-aminocyclopropane-1-carboxylate oxidase homolog 12-like [Glycine max]	0	0.139358	0.865249	0.56232	0.464054	1.19797	3.32844	3.71254
Novel01047	ZH16_S2_vs_ZH6_S2;ZH16_S3_vs_ZH6_S3;ZH16_S4_vs_ZH6_S4	--	hypothetical protein [Brassica napus]	0.0753512	0	0.163752	0	0.911769	5.77426	3.06184	1.83283
arahy.UY0F0V	ZH16_S1_vs_ZH6_S1;ZH16_S2_vs_ZH6_S2;ZH16_S4_vs_ZH6_S4	--	putative E3 ubiquitin-protein ligase XBAT31-like [Glycine max]	16.5083	0.850222	2.17404	0.267521	86.7311	5.86393	3.32762	3.29801
arahy.F592RX	ZH16_S1_vs_ZH6_S1;ZH16_S2_vs_ZH6_S2;ZH16_S3_vs_ZH6_S3	--	ARM REPEAT PROTEIN INTERACTING WITH ABF2-like isoform X1 [Glycine max]	0.207592	10.0286	0.698646	0.503915	4.87445	31.7912	7.98844	1.85148
Novel03281	ZH16_S1_vs_ZH6_S1;ZH16_S2_vs_ZH6_S2;ZH16_S4_vs_ZH6_S4	--	--	1.30256	1.03759	3.73765	1.18827	8.65844	12.0806	7.52864	6.85021
arahy.0KDF2J	ZH16_S1_vs_ZH6_S1;ZH16_S2_vs_ZH6_S2;ZH16_S3_vs_ZH6_S3	TF	myb transcription factor	4.4689	0.773638	0.26808	0.28365	18.4357	2.92129	1.46368	0.494747
arahy.QVIY92	ZH16_S2_vs_ZH6_S2;ZH16_S3_vs_ZH6_S3;ZH16_S4_vs_ZH6_S4	--	Unknown protein	0	0	0.290496	0	0.0826527	20.6862	9.8525	6.73505
arahy.1GJ1KV	ZH16_S1_vs_ZH6_S1;ZH16_S2_vs_ZH6_S2;ZH16_S4_vs_ZH6_S4	--	40S ribosomal protein S3a-1	1.28363	6.27645	5.83317	1.75802	4.47754	14.9971	8.78468	8.09572
Novel03212	ZH16_S1_vs_ZH6_S1;ZH16_S2_vs_ZH6_S2;ZH16_S4_vs_ZH6_S4	--	--	0.315102	1.02792	6.03755	2.37757	2.28141	5.24869	6.76076	7.57171
arahy.Q6N5X0	ZH16_S1_vs_ZH6_S1;ZH16_S2_vs_ZH6_S2;ZH16_S4_vs_ZH6_S4	--	Protein kinase superfamily protein	9.77045	2.20408	4.61591	3.35811	41.7408	6.0933	8.98722	7.02755
arahy.M16IE8	ZH16_S1_vs_ZH6_S1;ZH16_S2_vs_ZH6_S2;ZH16_S3_vs_ZH6_S3	--	Sec14p-like phosphatidylinositol transfer family protein	4.69538	6.52065	7.32248	13.5658	23.1311	17.2213	24.2873	18.0849
arahy.UUQR92	ZH16_S2_vs_ZH6_S2;ZH16_S3_vs_ZH6_S3;ZH16_S4_vs_ZH6_S4	--	Bifunctional dihydroflavonol 4-reductase/flavanone 4-reductase isoform 1 n=2 Tax=Theobroma cacao RepID=UPI00042B2159	7.55713	11.7205	8.4869	6.43006	12.2306	36.3666	19.6367	14.9112
arahy.9W326J	ZH16_S1_vs_ZH6_S1;ZH16_S2_vs_ZH6_S2;ZH16_S4_vs_ZH6_S4	--	blue copper protein-like [Glycine max]	0.160387	3.30854	10.5516	0.476265	5.68625	28.5581	19.1879	12.3598
arahy.WH4ILY	ZH16_S1_vs_ZH6_S1;ZH16_S2_vs_ZH6_S2;ZH16_S3_vs_ZH6_S3	--	Protein phosphatase 2C family protein	0.552649	4.15111	0.536536	0.16794	1.44584	8.38714	1.69526	0.266254
arahy.C8A64A	ZH16_S1_vs_ZH6_S1;ZH16_S2_vs_ZH6_S2;ZH16_S4_vs_ZH6_S4	--	Unknown protein	0	0.147956	0.863622	0	0.297791	2.40268	2.06976	1.83872
Novel03388	ZH16_S1_vs_ZH6_S1;ZH16_S2_vs_ZH6_S2;ZH16_S4_vs_ZH6_S4	--	--	0.034998	0.100467	2.20985	0.0320804	0.591165	8.57783	5.26654	3.34747
Novel00414	ZH16_S2_vs_ZH6_S2;ZH16_S3_vs_ZH6_S3;ZH16_S4_vs_ZH6_S4	--	--	0	0	0.0265103	0	0.37088	2.59294	2.1248	0.868991
arahy.4HBL4W	ZH16_S1_vs_ZH6_S1;ZH16_S2_vs_ZH6_S2;ZH16_S4_vs_ZH6_S4	--	group 1 family glycosyltransferase	0.081594	0	0.112307	0.0619446	3.43719	0.262284	0.635782	0.78647
Novel04540	ZH16_S2_vs_ZH6_S2;ZH16_S3_vs_ZH6_S3;ZH16_S4_vs_ZH6_S4	--	--	0.0573771	0	0	0	0.462116	1.94474	2.54346	1.1474
Novel03652	ZH16_S2_vs_ZH6_S2;ZH16_S3_vs_ZH6_S3;ZH16_S4_vs_ZH6_S4	--	--	0	0	0.085094	0	0.442285	4.76158	2.37086	2.7217
arahy.RUY2TK	ZH16_S1_vs_ZH6_S1;ZH16_S3_vs_ZH6_S3;ZH16_S4_vs_ZH6_S4	--	E3 ubiquitin-protein ligase XBAT33-like isoform X1 [Glycine max]	0	1.39155	0	0	1.50743	3.43033	1.65517	1.45471
arahy.AZQV6X	ZH16_S1_vs_ZH6_S1;ZH16_S2_vs_ZH6_S2;ZH16_S4_vs_ZH6_S4	--	Glutathione S-transferase family protein	0.453123	12.9341	18.8817	3.69279	18.1545	54.472	31.9204	19.9388
arahy.Q6JUAH	ZH16_S1_vs_ZH6_S1;ZH16_S2_vs_ZH6_S2;ZH16_S4_vs_ZH6_S4	DBB	zinc finger protein CONSTANS-LIKE 2-like [Glycine max]	0.70761	3.81475	8.82627	6.32034	2.44729	8.48154	14.208	12.9084
arahy.22IVZ0	ZH16_S1_vs_ZH6_S1;ZH16_S2_vs_ZH6_S2;ZH16_S3_vs_ZH6_S3	--	gibberellin 20 oxidase 2-like [Glycine max]	0.618055	3.72973	12.3559	17.1981	2.17047	29.4684	44.0821	33.3659
arahy.FRGP6V	ZH16_S1_vs_ZH6_S1;ZH16_S2_vs_ZH6_S2	--	MLP-like protein 43	37.9443	29.6275	26.9201	25.4945	153.119	85.9075	57.986	50.3511
arahy.97A83C	ZH16_S2_vs_ZH6_S2;ZH16_S4_vs_ZH6_S4	--	uncharacterized protein LOC100805208 isoform X2 [Glycine max]	4.95006	4.26742	5.13776	2.33133	7.30796	13.3673	7.52953	5.70336
arahy.HFU20B	ZH16_S1_vs_ZH6_S1;ZH16_S2_vs_ZH6_S2	--	PGR5-LIKE A	0.487001	4.14088	2.83144	2.66947	1.00023	8.28447	3.75679	3.50127
Novel03222	ZH16_S2_vs_ZH6_S2;ZH16_S4_vs_ZH6_S4	--	PREDICTED: ABC transporter A family member 1-like [Nicotiana sylvestris]	0	0.198793	0.263856	0	0.0296289	2.54947	1.3693	0.961609
arahy.JE8Q7C	ZH16_S2_vs_ZH6_S2;ZH16_S4_vs_ZH6_S4	--	terpene synthase 04	0.394637	2.15174	2.41948	0.792389	0.828412	7.07221	4.93566	2.45858
arahy.7US8C9	ZH16_S1_vs_ZH6_S1;ZH16_S2_vs_ZH6_S2	--	sucrose transporter 4	5.63241	8.69572	57.5617	40.2705	26.4536	20.2524	36.9216	32.4228
arahy.0X1Y55	ZH16_S1_vs_ZH6_S1;ZH16_S2_vs_ZH6_S2	--	peptide transporter 1	1.19258	14.8657	25.084	6.36309	6.22352	45.3237	13.3635	4.36309
Novel02736	ZH16_S1_vs_ZH6_S1;ZH16_S3_vs_ZH6_S3	--	RNA-directed DNA polymerase (Reverse transcriptase); Polynucleotidyl transferase, Ribonuclease H fold [Medicago truncatula]	0	0.158698	0	0.151485	5.619	2.08727	2.95183	0.586895
arahy.774XBT	ZH16_S1_vs_ZH6_S1;ZH16_S2_vs_ZH6_S2	--	alpha/beta-hydrolase superfamily protein	7.49603	4.62478	4.98425	2.69899	16.9622	13.8748	6.38017	4.95679
arahy.IHX1LT	ZH16_S1_vs_ZH6_S1;ZH16_S2_vs_ZH6_S2	--	Plasma membrane mannitol transporter n=1 Tax=Arachis hypogaea RepID=B2Z3Y4_ARAHY	5.21042	1.1256	0.864107	0.423814	11.0529	2.8284	0.766961	0.151684
arahy.1LGD4F	ZH16_S1_vs_ZH6_S1;ZH16_S3_vs_ZH6_S3	--	ribonuclease 1	1.54129	11.5946	0.339514	0.0879169	9.47549	8.25898	1.49807	0
arahy.K1R19W	ZH16_S1_vs_ZH6_S1;ZH16_S2_vs_ZH6_S2	--	UDP-D-glucuronate 4-epimerase 6	10.5045	0.0961856	0.146989	0.206966	21.1088	0.970893	0.164577	0
arahy.GQ1BIK	ZH16_S1_vs_ZH6_S1;ZH16_S2_vs_ZH6_S2	--	glyoxal oxidase-related protein	62.6866	19.4525	54.5358	9.78452	166.475	44.6205	23.8062	9.79569
arahy.X181HS	ZH16_S2_vs_ZH6_S2;ZH16_S3_vs_ZH6_S3	--	O-methyltransferase 1	28.809	40.8861	4.93273	3.06667	38.2417	181.03	27.7536	5.71237
arahy.FRHN34	ZH16_S1_vs_ZH6_S1;ZH16_S2_vs_ZH6_S2	--	Membrane transporter D1 n=3 Tax=Andropogoneae RepID=B6U4Q3_MAIZE	10.8352	2.96402	3.92857	2.88458	24.5793	8.41345	3.71709	0.86279
arahy.E1RKLH	ZH16_S1_vs_ZH6_S1;ZH16_S2_vs_ZH6_S2	--	ATP-binding ABC transporter	0.621784	0.194675	0.353052	0.0748065	1.70114	0.568486	0.102668	0.0219905
arahy.09KEBU	ZH16_S1_vs_ZH6_S1;ZH16_S2_vs_ZH6_S2	--	MATE efflux family protein	0.0333691	1.45577	2.17725	2.27016	0.80606	7.19683	4.02309	2.94255
Novel01598	ZH16_S1_vs_ZH6_S1;ZH16_S3_vs_ZH6_S3	--	--	0	20.8561	0.14964	0.116149	0.238795	10.1262	1.10768	0.169407
arahy.DJ5K9Q	ZH16_S2_vs_ZH6_S2;ZH16_S3_vs_ZH6_S3	--	putative DNA-binding protein ESCAROLA-like [Glycine max]	0.533701	0.41867	0.363857	0.144032	0.155791	3.44104	5.70403	0.252068
arahy.7LZL5F	ZH16_S1_vs_ZH6_S1;ZH16_S4_vs_ZH6_S4	--	chaperonin 20	3.56713	31.6801	15.5509	4.15708	8.36329	53.0461	30.4599	10.7449
Novel03184	ZH16_S1_vs_ZH6_S1;ZH16_S2_vs_ZH6_S2	--	PREDICTED: uncharacterized protein LOC100810770 [Glycine max]	19.0943	10.6292	75.3518	45.9834	44.3307	34.1355	43.3849	27.3421
Novel03213	ZH16_S2_vs_ZH6_S2;ZH16_S4_vs_ZH6_S4	--	putative non-LTR retroelement reverse transcriptase [Arabidopsis thaliana]	0.0450159	0.199987	0.179679	0	0.393579	2.19851	0.799012	1.18212
Novel01415	ZH16_S1_vs_ZH6_S1;ZH16_S2_vs_ZH6_S2	--	Zeatin O-glucosyltransferase [Glycine soja]	9.25957	4.08707	57.02	26.8175	21.5559	15.056	36.1556	33.739
Novel03616	ZH16_S1_vs_ZH6_S1;ZH16_S2_vs_ZH6_S2	--	--	2.51158	7.75499	176.297	209.247	10.4898	94.362	293.722	363.963
arahy.0KZ8F2	ZH16_S3_vs_ZH6_S3;ZH16_S4_vs_ZH6_S4	LBD	LOB domain-containing protein 4	0	0	0.159234	0.0542201	0.0759179	0.0909537	4.66001	5.57495
arahy.ZI68GB	ZH16_S2_vs_ZH6_S2;ZH16_S4_vs_ZH6_S4	--	uncharacterized protein LOC100793454 [Glycine max]	0.718471	1.21194	1.96435	0.0412055	1.02632	3.97102	2.95987	0.803417
arahy.S0TT2Y	ZH16_S1_vs_ZH6_S1;ZH16_S3_vs_ZH6_S3	--	CDGSH iron-sulfur domain protein	0.120325	2.76202	0.104254	0.159536	1.48718	3.73587	1.15458	0.236422
arahy.GET2P3	ZH16_S2_vs_ZH6_S2;ZH16_S3_vs_ZH6_S3	--	pentatricopeptide (PPR) repeat-containing protein	0.0139446	0.0123413	0	0	0.0633234	0.570858	0.479922	0.257887
arahy.YRJ0LE	ZH16_S1_vs_ZH6_S1;ZH16_S2_vs_ZH6_S2	--	nitrate transporter 1.5	0.436006	0.195105	17.0805	4.72382	3.16705	0.963454	15.3477	7.53212
arahy.1V63ZN	ZH16_S1_vs_ZH6_S1;ZH16_S3_vs_ZH6_S3	TF	heat shock transcription factor B4	2.66029	12.9658	5.24245	2.40683	8.73862	13.9096	11.7105	2.08183
arahy.WLHM97	ZH16_S2_vs_ZH6_S2;ZH16_S4_vs_ZH6_S4	--	glycogen/starch/alpha-glucan phosphorylase family protein	0	0	0.518523	0	0.193562	2.05184	2.35499	0.728143
arahy.19RR7F	ZH16_S1_vs_ZH6_S1;ZH16_S2_vs_ZH6_S2	--	Bifunctional inhibitor/lipid-transfer protein/seed storage 2S albumin superfamily protein	80.7594	0.516861	14.097	3.72654	243.102	9.87975	5.98655	3.10868
arahy.G3162F	ZH16_S1_vs_ZH6_S1;ZH16_S3_vs_ZH6_S3	--	ribulose bisphosphate carboxylase/oxygenase activase	2.34184	15.768	0.172534	0.0163827	4.94604	25.2194	3.28674	0
arahy.61MS4Z	ZH16_S3_vs_ZH6_S3;ZH16_S4_vs_ZH6_S4	--	Regulator of chromosome condensation (RCC1) family protein	6.79327	15.4403	4.50384	3.64807	13.1034	25.6741	10.525	6.99054
arahy.8QDS1I	ZH16_S1_vs_ZH6_S1;ZH16_S3_vs_ZH6_S3	AUX/IAA	Auxin-responsive protein n=2 Tax=Populus RepID=B9GWR2_POPTR	16.9294	20.3867	0.51572	1.62269	47.422	5.37227	2.22688	1.85152
arahy.7NDL57	ZH16_S1_vs_ZH6_S1;ZH16_S2_vs_ZH6_S2	--	MATE efflux family protein	0	0.66907	0.666234	1.01779	0.340332	3.44014	1.63242	1.56638
Novel03341	ZH16_S1_vs_ZH6_S1;ZH16_S3_vs_ZH6_S3	--	--	0.592816	5.25966	2.05998	2.64249	1.76945	8.31034	5.07276	5.58658
arahy.195J1V	ZH16_S1_vs_ZH6_S1;ZH16_S4_vs_ZH6_S4	--	Protein kinase superfamily protein	6.87357	6.16519	5.18715	4.15693	14.1036	7.40022	8.39222	10.4312
Novel04198	ZH16_S3_vs_ZH6_S3;ZH16_S4_vs_ZH6_S4	--	hypothetical protein VITISV_024648 [Vitis vinifera]	0.13368	0	0	0	0.112876	0.251182	0.731184	0.746106
arahy.624Z3W	ZH16_S1_vs_ZH6_S1;ZH16_S2_vs_ZH6_S2	--	Peroxidase family protein	6.66145	0.857471	5.6972	0.553325	35.9288	6.08462	3.92945	0.184567
arahy.SZ4JBM	ZH16_S2_vs_ZH6_S2;ZH16_S4_vs_ZH6_S4	--	Pentatricopeptide repeat (PPR) superfamily protein	1.11006	4.61057	3.99683	3.06554	2.16224	9.99307	7.53299	7.52321
arahy.PDF2MW	ZH16_S1_vs_ZH6_S1;ZH16_S3_vs_ZH6_S3	TF	AP2/B3 transcription factor family protein	13.8533	0.936621	3.75637	0.631105	40.6725	1.54036	8.42522	1.3622
arahy.Y3CUXW	ZH16_S1_vs_ZH6_S1;ZH16_S2_vs_ZH6_S2	--	Plant basic secretory protein (BSP) family protein	2.67611	1.2381	2.28342	0.906322	12.1766	3.91037	1.69613	0.269742
arahy.G4Y2Y5	ZH16_S2_vs_ZH6_S2;ZH16_S4_vs_ZH6_S4	--	receptor-like kinase	212.018	36.1065	17.7797	11.0579	236.103	83.735	29.9146	22.5011
arahy.X2F5F9	ZH16_S1_vs_ZH6_S1;ZH16_S2_vs_ZH6_S2	--	4-coumarate:CoA ligase 2	0.95654	0.145976	4.46916	4.01887	3.413	1.30931	5.33939	4.56456
arahy.4M9DN5	ZH16_S1_vs_ZH6_S1;ZH16_S3_vs_ZH6_S3	--	matrix metalloproteinase precursor [Glycine max]	0	0.944617	0	0.0830269	2.14621	1.18904	0.0892188	0.0696151
arahy.6J3MKV	ZH16_S1_vs_ZH6_S1;ZH16_S2_vs_ZH6_S2	CO-like	zinc finger protein CONSTANS-LIKE 5-like [Glycine max]	8.50578	2.85127	7.50617	4.11713	32.37	7.45753	4.65908	1.8924
arahy.EB1RPN	ZH16_S1_vs_ZH6_S1;ZH16_S3_vs_ZH6_S3	--	2-oxoisovalerate dehydrogenase subunit alpha	0.46108	4.57809	1.17283	0.834203	3.28844	9.37343	5.69472	2.60022
arahy.BDKN1M	ZH16_S1_vs_ZH6_S1;ZH16_S2_vs_ZH6_S2	--	UDP-Glycosyltransferase superfamily protein	7.74892	7.57148	149.232	87.4528	19.7474	29.3086	107.213	82.2321
arahy.V9YDBD	ZH16_S1_vs_ZH6_S1;ZH16_S3_vs_ZH6_S3	NAC	NAC domain containing protein 73	0.908697	0.653043	0.0203246	0.318508	2.88231	0.546844	0.577569	0.15467
arahy.8W099G	ZH16_S2_vs_ZH6_S2;ZH16_S3_vs_ZH6_S3	--	pyruvate decarboxylase-2	0.553321	21.4485	2.51972	0.559049	0.785927	42.5615	12.5047	0.640086
arahy.HGAZ7D	ZH16_S1_vs_ZH6_S1;ZH16_S2_vs_ZH6_S2	TF	ethylene-responsive transcription factor 1B	42.7447	20.2316	71.7288	10.6565	110.379	93.0247	57.9226	9.06387
arahy.I3B116	ZH16_S2_vs_ZH6_S2;ZH16_S4_vs_ZH6_S4	--	protein YIF1B-like isoform X3 [Glycine max]	5.56249	10.2253	10.551	6.05461	9.61243	22.3261	20.6244	19.0142
arahy.HJ8AGK	ZH16_S1_vs_ZH6_S1;ZH16_S2_vs_ZH6_S2	--	Ribonuclease HI n=3 Tax=Lactobacillus RepID=E4SJS0_LACAR	0	2.35116	3.89767	2.02528	0.169185	6.63727	5.77557	3.33508
arahy.KKSD5Z	ZH16_S1_vs_ZH6_S1;ZH16_S2_vs_ZH6_S2	--	endoglucanase 25-like [Glycine max]	20.4267	2.36256	7.61153	4.1479	42.9509	7.60129	11.5714	7.65324
arahy.A0NHG5	ZH16_S1_vs_ZH6_S1;ZH16_S2_vs_ZH6_S2	--	BURP domain-containing protein	0.715322	1.69657	13.6591	6.47916	5.25576	6.82628	8.43047	4.59873
Novel04469	ZH16_S2_vs_ZH6_S2;ZH16_S4_vs_ZH6_S4	--	endo/excinuclease amino terminal domain protein [Medicago truncatula]	0.0462468	0.16547	0.242478	0	0.161642	1.44267	0.530268	0.42506
arahy.G2QLGI	ZH16_S2_vs_ZH6_S2;ZH16_S4_vs_ZH6_S4	--	plant synaptotagmin	0	0.447212	0.71665	0	0.117382	4.05457	2.0299	2.45505
arahy.J970EA	ZH16_S3_vs_ZH6_S3;ZH16_S4_vs_ZH6_S4	--	Stress induced protein	0	0	2.1522	9.17637	0.108004	0.105221	10.7433	26.4351
arahy.1F2DVT	ZH16_S1_vs_ZH6_S1;ZH16_S3_vs_ZH6_S3	TF	heat shock transcription factor B4	5.26854	5.15888	2.46076	0.937622	14.4705	6.60187	7.96994	1.08722
arahy.35X8AA	ZH16_S1_vs_ZH6_S1;ZH16_S2_vs_ZH6_S2	--	4-coumarate:CoA ligase 2	1.0762	0.221566	6.48568	3.49786	3.1647	0.955836	5.49863	4.55719
arahy.PN0N9Z	ZH16_S2_vs_ZH6_S2;ZH16_S4_vs_ZH6_S4	--	terpene synthase 04	2.44529	3.08414	91.9568	37.0524	2.39177	6.994	132.084	81.8323
arahy.EM9KCS	ZH16_S2_vs_ZH6_S2;ZH16_S3_vs_ZH6_S3	--	methyl esterase 11	21.7836	3.38242	3.15529	2.48887	38.1143	8.51837	8.41825	4.8825
arahy.Q7RPPP	ZH16_S2_vs_ZH6_S2;ZH16_S4_vs_ZH6_S4	--	Cyclase family protein	6.0803	3.0534	5.9352	2.32819	8.61396	7.5058	7.98258	5.5379
arahy.D8U91S	ZH16_S1_vs_ZH6_S1;ZH16_S3_vs_ZH6_S3	TF	SRF-type transcription factor (DNA-binding and dimerization domain) protein	0	32.356	0.0301484	0	1.23245	28.5654	3.43789	0
arahy.WE5WNX	ZH16_S1_vs_ZH6_S1;ZH16_S2_vs_ZH6_S2	--	receptor-like serine/threonine kinase 2	0.0171271	0.294419	6.15622	6.11912	0.241978	0.910993	3.15366	3.31374
arahy.PI6GK2	ZH16_S1_vs_ZH6_S1;ZH16_S3_vs_ZH6_S3	--	photosystem I reaction center subunit IV A	1.26183	10.273	0.300793	0.0762467	7.22139	9.96828	1.95257	0.166417
arahy.5LA7CV	ZH16_S3_vs_ZH6_S3;ZH16_S4_vs_ZH6_S4	--	Peroxidase superfamily protein	0.690086	4.64928	1.28941	2.73923	1.04523	9.93629	6.46987	8.19382
arahy.74GVQ2	ZH16_S1_vs_ZH6_S1;ZH16_S2_vs_ZH6_S2	--	N(6)-adenine-specific DNA methyltransferase	0	0	0	0	1.23083	6.3364	0.975104	1.79261
arahy.506V44	ZH16_S1_vs_ZH6_S1;ZH16_S4_vs_ZH6_S4	--	chitinase-like protein PB1E7.04c-like isoform X3 [Glycine max]	2.98052	5.31662	3.15963	2.0949	6.18032	9.37942	5.66618	5.16988
arahy.NC2K0T	ZH16_S1_vs_ZH6_S1;ZH16_S4_vs_ZH6_S4	--	phosphatidylinositol-4-phosphate 5-kinase family protein	6.36494	6.01292	5.35356	3.63723	20.2929	10.6043	7.26293	7.21421
arahy.JR9DQ2	ZH16_S1_vs_ZH6_S1;ZH16_S2_vs_ZH6_S2	--	Cation efflux family protein	0.579685	1.90278	9.27412	4.55894	1.52594	4.46391	9.41082	4.01344
arahy.K33YLS	ZH16_S1_vs_ZH6_S1;ZH16_S2_vs_ZH6_S2	--	aspartate aminotransferase	1.02427	1.84847	0.968971	1.02339	2.66219	4.56921	1.57554	1.20731
arahy.5AH4BP	ZH16_S1_vs_ZH6_S1;ZH16_S2_vs_ZH6_S2	--	Glutathione S-transferase family protein	12.0186	7.54019	5.92002	5.89296	36.7107	22.1324	12.2926	12.5394
arahy.XD3PB3	ZH16_S1_vs_ZH6_S1;ZH16_S2_vs_ZH6_S2	--	transmembrane protein, putative	0.0320104	0	0.64271	0.145356	1.45938	2.29867	1.02238	0.0481387
Novel01566	ZH16_S3_vs_ZH6_S3;ZH16_S4_vs_ZH6_S4	--	--	0.0577308	0.588139	0.894423	0	0.281912	1.17716	4.23905	6.52115
arahy.64AR13	ZH16_S1_vs_ZH6_S1;ZH16_S3_vs_ZH6_S3	--	Ubiquitin-conjugating enzyme family protein	3.22739	2.44538	1.36737	1.03421	62.75	3.01264	55.1468	1.25515
arahy.FJ610L	ZH16_S3_vs_ZH6_S3;ZH16_S4_vs_ZH6_S4	--	GASA/GAST/Snakin	3197.4	45.4969	7.77178	1.93481	5418.82	85.5309	25.7842	5.56011
arahy.9169VS	ZH16_S2_vs_ZH6_S2;ZH16_S3_vs_ZH6_S3	--	C3HC4-type RING zinc finger protein	0.935373	2.75131	1.0494	1.99734	1.8646	6.13674	3.40361	4.43121
arahy.MEA9U7	ZH16_S1_vs_ZH6_S1;ZH16_S3_vs_ZH6_S3	--	unknown protein	0.0984189	3.01458	7.5891	4.31065	1.64735	5.41909	15.9485	8.6474
arahy.X9PUIV	ZH16_S2_vs_ZH6_S2;ZH16_S4_vs_ZH6_S4	--	nodulin MtN21 /EamA-like transporter family protein	0	0.784081	3.51909	1.50481	0	3.48662	4.46618	4.25139
arahy.1BRL89	ZH16_S3_vs_ZH6_S3;ZH16_S4_vs_ZH6_S4	--	uncharacterized tRNA-binding protein C30C2.04-like [Glycine max]	9.29528	25.832	14.0248	9.38545	14.2058	42.1157	30.583	21.5205
arahy.06RI6S	ZH16_S1_vs_ZH6_S1;ZH16_S2_vs_ZH6_S2	--	low-temperature-induced 65 kDa protein-like [Glycine max]	44.2625	3.63511	2.98456	2.38442	173.578	11.5524	4.009	1.75081
arahy.NGDJ3K	ZH16_S1_vs_ZH6_S1;ZH16_S2_vs_ZH6_S2	--	Protein of unknown function (DUF179)	4.42685	9.4086	19.2975	16.1838	10.8228	28.9758	33.9087	28.439
arahy.CIMT38	ZH16_S2_vs_ZH6_S2;ZH16_S4_vs_ZH6_S4	--	Unknown protein	10.1861	15.1195	28.7315	10.708	26.5973	84.4924	82.4655	44.0819
arahy.NI1FRU	ZH16_S2_vs_ZH6_S2;ZH16_S3_vs_ZH6_S3	--	caffeoylshikimate esterase-like isoform X3 [Glycine max]	0.106183	12.5499	1.40757	0.249797	0.312614	30.477	5.04792	0.197895
arahy.2I1I1C	ZH16_S1_vs_ZH6_S1;ZH16_S2_vs_ZH6_S2	--	ATP synthase delta-subunit gene	11.9769	13.9258	18.4339	5.84676	28.1047	28.8195	16.3943	5.55873
arahy.9J8RGD	ZH16_S1_vs_ZH6_S1;ZH16_S2_vs_ZH6_S2	--	Cytochrome P450 superfamily protein	0.159134	0.0918408	1.31866	0.698968	1.32876	0.556249	1.12636	0.358562
arahy.WG90F5	ZH16_S1_vs_ZH6_S1;ZH16_S2_vs_ZH6_S2	--	Protein phosphatase 2C family protein	7.7562	12.7155	36.5933	32.7009	18.2745	32.0039	34.8747	30.8259
arahy.AAI9J8	ZH16_S1_vs_ZH6_S1;ZH16_S2_vs_ZH6_S2	--	F-box/kelch-repeat protein At1g22040-like [Glycine max]	19.8406	0.596557	1.10786	0.425115	39.907	2.01237	0.370638	0.407465
arahy.JE9L1P	ZH16_S2_vs_ZH6_S2;ZH16_S4_vs_ZH6_S4	--	Late embryogenesis abundant (LEA) protein	2.54898	4.45955	36.4441	16.7385	2.67697	10.7231	40.3177	33.3737
arahy.10QJ8K	ZH16_S2_vs_ZH6_S2;ZH16_S3_vs_ZH6_S3	--	uncharacterized protein LOC100779146 [Glycine max]	0.0790296	0.0808258	0.0164858	0.0441372	0.212024	0.878392	0.55465	0.419618
Novel05078	ZH16_S1_vs_ZH6_S1;ZH16_S2_vs_ZH6_S2	--	--	0.171677	0.892395	3.07272	2.77085	0.955032	5.08538	5.25449	3.73118
arahy.GBIZ4M	ZH16_S1_vs_ZH6_S1;ZH16_S2_vs_ZH6_S2	--	subtilisin-like serine protease 2	0.27578	0.25281	2.27053	2.97061	1.95235	1.23898	1.21341	2.2756
arahy.GXCU2T	ZH16_S2_vs_ZH6_S2;ZH16_S4_vs_ZH6_S4	--	limonoid UDP-glucosyltransferase-like [Glycine max]	0.174319	0.88391	0.413333	0.146916	0.36229	2.96634	1.08584	0.637811
arahy.IMLK5J	ZH16_S1_vs_ZH6_S1;ZH16_S2_vs_ZH6_S2	--	4-coumarate:CoA ligase 3	6.39277	5.82866	7.94705	3.82859	16.5171	13.0818	5.91647	4.62268
Novel01453	ZH16_S1_vs_ZH6_S1;ZH16_S2_vs_ZH6_S2	--	PREDICTED: uncharacterized protein LOC101512495 [Cicer arietinum]	3.84688	1.14963	6.39475	4.8327	15.1627	3.59445	3.61005	2.51097
arahy.E47MBS	ZH16_S3_vs_ZH6_S3;ZH16_S4_vs_ZH6_S4	--	Unknown protein	241.793	275.11	10.0704	7.64688	128.033	183.148	35.4745	20.2143
arahy.PK48VF	ZH16_S1_vs_ZH6_S1;ZH16_S2_vs_ZH6_S2	TF	heat shock transcription factor C1	7.67271	0.226096	0.0682968	0.0669177	18.3897	0.864216	0.290902	0
arahy.FUJV0P	ZH16_S2_vs_ZH6_S2;ZH16_S4_vs_ZH6_S4	--	DNAJ-like 20	0.0852001	1.2341	101.412	25.4255	0	15.5661	126.922	65.8322
arahy.65ZHYZ	ZH16_S1_vs_ZH6_S1;ZH16_S3_vs_ZH6_S3	TF	heat shock transcription factor B4	0	40.665	0.15361	0.153825	0.391837	12.8192	2.07061	0.143885
arahy.V8I50K	ZH16_S1_vs_ZH6_S1;ZH16_S2_vs_ZH6_S2	TF	AP2-like ethylene-responsive transcription factor AIL1-like [Glycine max]	0	0.471037	5.28437	4.36839	0.31151	2.63711	4.90275	4.54262
Novel04025	ZH16_S1_vs_ZH6_S1;ZH16_S2_vs_ZH6_S2	--	hypothetical protein MTR_8g031230 [Medicago truncatula]	0	0	0	0	0.684474	1.4073	0.216528	0
arahy.IJP56S	ZH16_S1_vs_ZH6_S1;ZH16_S4_vs_ZH6_S4	--	methyl esterase 11	3.01759	6.46427	2.84945	2.27877	6.24297	10.907	4.63244	4.90502
arahy.B4TR6Y	ZH16_S1_vs_ZH6_S1;ZH16_S3_vs_ZH6_S3	--	uncharacterized protein LOC100781926 isoform X2 [Glycine max]	6.19808	25.0571	9.84036	12.7678	13.97	34.954	25.5011	21.0845
arahy.B5ZMPY	ZH16_S1_vs_ZH6_S1;ZH16_S2_vs_ZH6_S2	--	xyloglucan endotransglucosylase/hydrolase 32	0.0219803	0.505676	9.93011	7.59674	0.601443	67.4751	28.5218	10.506
arahy.L55A0V	ZH16_S1_vs_ZH6_S1;ZH16_S2_vs_ZH6_S2	TALE	BEL1-like homeodomain protein 1-like isoform X4 [Glycine max]	1.29658	0.107721	5.09661	5.67282	2.97426	0.889886	5.73711	6.79517
arahy.0H1B5V	ZH16_S1_vs_ZH6_S1;ZH16_S3_vs_ZH6_S3	--	filament-like plant protein 4-like isoform X2 [Glycine max]	0.271804	6.68696	0.62679	0.841485	0.997167	4.3286	1.70749	0.733754
arahy.A4E3FF	ZH16_S2_vs_ZH6_S2;ZH16_S4_vs_ZH6_S4	--	Unknown protein	17.9963	18.3126	27.4759	35.2069	23.1324	54.8075	46.649	81.6922
arahy.A74HRV	ZH16_S3_vs_ZH6_S3;ZH16_S4_vs_ZH6_S4	--	calcium-transporting ATPase 8, plasma membrane-type protein	29.9644	18.3965	9.52014	11.1749	34.1773	24.5592	20.1543	21.3454
arahy.81W4VQ	ZH16_S1_vs_ZH6_S1;ZH16_S2_vs_ZH6_S2	--	acyl-CoA synthetase 5	0.908766	5.51717	115.23	144.922	2.47753	11.0828	124.709	168.374
arahy.RJ9TTJ	ZH16_S1_vs_ZH6_S1;ZH16_S2_vs_ZH6_S2	--	senescence-associated carboxylesterase 101-like isoform X1 [Glycine max]	0.578167	0.384279	3.47709	2.92614	4.5918	1.81288	2.17312	1.05581
arahy.9P6YIX	ZH16_S1_vs_ZH6_S1;ZH16_S3_vs_ZH6_S3	--	alcohol dehydrogenase 1	1.35089	8.05028	0.814295	1.46742	3.67514	5.97059	2.32222	0.721754
Novel02532	ZH16_S1_vs_ZH6_S1;ZH16_S2_vs_ZH6_S2	--	--	2.89967	1.47189	5.44462	4.90222	11.3474	5.91466	5.29453	2.45587
arahy.HF4B4K	ZH16_S1_vs_ZH6_S1;ZH16_S3_vs_ZH6_S3	--	Amidohydrolase family	0.545744	2.9503	1.16766	1.30559	1.58303	4.95554	3.17044	2.70416
arahy.9EZ8VA	ZH16_S1_vs_ZH6_S1;ZH16_S3_vs_ZH6_S3	--	uncharacterized protein LOC100804499 isoform X6 [Glycine max]	8.21718	6.35078	1.63452	2.11218	18.5022	5.96546	3.84137	3.39735
Novel03500	ZH16_S1_vs_ZH6_S1;ZH16_S3_vs_ZH6_S3	--	copper amine oxidase, enzyme domain protein [Medicago truncatula]	1.44265	4.15422	2.06992	1.58433	4.32751	6.57771	5.41187	3.26922
arahy.D1YG1E	ZH16_S2_vs_ZH6_S2;ZH16_S4_vs_ZH6_S4	--	cofactor-independent phosphoglycerate mutase	17.6596	10.3011	18.7892	11.1829	26.8331	25.2738	24.8854	21.7127
arahy.SQ507X	ZH16_S1_vs_ZH6_S1;ZH16_S2_vs_ZH6_S2	--	nodulin MtN21 /EamA-like transporter family protein	0.189792	2.62257	27.5307	18.3328	0.862407	11.2077	28.7413	24.6852
arahy.782MA8	ZH16_S1_vs_ZH6_S1;ZH16_S2_vs_ZH6_S2	--	early nodulin-like protein 2	3.3147	10.4404	9.43771	6.97288	10.4579	20.4963	11.3182	7.79751
Novel04667	ZH16_S1_vs_ZH6_S1;ZH16_S2_vs_ZH6_S2	--	--	1.16923	0.459084	3.09247	2.16893	3.31121	1.46004	3.01181	2.5471
arahy.J3JCMQ	ZH16_S1_vs_ZH6_S1;ZH16_S2_vs_ZH6_S2	--	HVA22 homologue E	2.03252	0.310779	1.04441	2.87476	7.0283	2.09423	2.17888	2.80092
arahy.W2WG0I	ZH16_S1_vs_ZH6_S1;ZH16_S2_vs_ZH6_S2	--	beta glucosidase 15	1.71773	2.91132	7.81065	5.36999	12.7354	13.5297	12.315	10.1073
arahy.N54HYV	ZH16_S1_vs_ZH6_S1;ZH16_S2_vs_ZH6_S2	--	putative nuclease HARBI1-like [Glycine max]	0.0418662	0	0	0	2.25283	1.14554	0.269726	0.047523
arahy.A6X2CD	ZH16_S3_vs_ZH6_S3;ZH16_S4_vs_ZH6_S4	--	Protein kinase superfamily protein	16.1416	27.1607	14.9006	15.0849	29.6477	39.8048	31.7651	28.6081
arahy.FHUH7B	ZH16_S1_vs_ZH6_S1;ZH16_S2_vs_ZH6_S2	--	Ribulose bisphosphate carboxylase (small chain) family protein	2.74596	21.5196	17.7309	1.20116	14.2472	93.3742	26.6054	1.5242
arahy.I56F9F	ZH16_S1_vs_ZH6_S1;ZH16_S2_vs_ZH6_S2	--	Ribulose bisphosphate carboxylase (small chain) family protein	0.330784	6.90392	4.43703	0.302751	1.79004	21.1003	6.60647	0.0825712
Novel03046	ZH16_S1_vs_ZH6_S1;ZH16_S2_vs_ZH6_S2	--	polygalacturonase inhibitor protein [Medicago truncatula]	7.8446	2.62322	2.41248	1.05054	25.6674	10.5941	4.6801	2.48587
arahy.69TWVD	ZH16_S2_vs_ZH6_S2;ZH16_S4_vs_ZH6_S4	--	Late embryogenesis abundant protein, group 1 protein	0.0452667	0.293298	13.6638	9.79389	0	2.06653	17.4743	24.0278
arahy.6AJ1CT	ZH16_S1_vs_ZH6_S1;ZH16_S3_vs_ZH6_S3	--	uncharacterized protein At1g04910-like [Glycine max]	1.2915	5.99296	2.84817	3.50441	2.67688	9.61512	6.81383	4.31417
arahy.0V01Q6	ZH16_S2_vs_ZH6_S2;ZH16_S3_vs_ZH6_S3	--	malate synthase	0.0231864	0.0205205	0.0607525	0.02621	0.311423	0.790177	1.05974	0.463671
arahy.CCG5WH	ZH16_S1_vs_ZH6_S1;ZH16_S2_vs_ZH6_S2	--	polygalacturonase 4	2.04145	0.149754	2.024	0.231887	5.95908	0.922901	2.35129	0.352256
arahy.2HNW91	ZH16_S1_vs_ZH6_S1;ZH16_S2_vs_ZH6_S2	--	ATP-dependent chaperone ClpB	0.720961	0.121524	1.20531	0.0965113	2.81098	0.656436	2.68027	0.102655
arahy.4IKS7C	ZH16_S1_vs_ZH6_S1;ZH16_S2_vs_ZH6_S2	--	sieve element occlusion protein	2.47548	1.9353	4.06859	3.37791	14.5954	27.5546	17.776	13.691
arahy.9U5P9R	ZH16_S1_vs_ZH6_S1;ZH16_S2_vs_ZH6_S2	--	peptide transporter 1	0.629128	1.83464	0.535813	0.087354	2.0342	4.27382	0.996622	0.0573674
arahy.DKZE4I	ZH16_S3_vs_ZH6_S3;ZH16_S4_vs_ZH6_S4	--	late embryogenesis abundant protein B19.1A	0	1.42577	67.3976	224.301	0.246455	0.621669	293.02	610.358
Novel01748	ZH16_S1_vs_ZH6_S1;ZH16_S2_vs_ZH6_S2	--	PREDICTED: uncharacterized protein LOC103445169 [Malus domestica]	2.14779	0.43557	1.41321	0.777624	9.83367	1.33256	1.93831	1.37779
arahy.4BKT9D	ZH16_S3_vs_ZH6_S3;ZH16_S4_vs_ZH6_S4	--	Cytochrome P450 superfamily protein	0.0254581	0.0671641	0	0.211216	0.0776499	0.0261623	1.06858	3.92895
arahy.V3AFID	ZH16_S1_vs_ZH6_S1;ZH16_S2_vs_ZH6_S2	TF	WRKY family transcription factor family protein	7.83447	5.32527	7.27487	5.96537	21.3198	12.4699	12.0201	9.40085
Novel00011	ZH16_S1_vs_ZH6_S1;ZH16_S2_vs_ZH6_S2	--	hypothetical protein MTR_8g066850 [Medicago truncatula]>gi|355522820|gb|AET03274.1| transmembrane protein, putative [Medicago truncatula]	44.3773	0.247301	6.69385	2.37075	109.45	1.75237	2.75628	0.782699
arahy.NC09XL	ZH16_S1_vs_ZH6_S1;ZH16_S2_vs_ZH6_S2	--	4-coumarate:CoA ligase 2	11.381	4.4869	12.8807	6.72743	36.1094	9.76254	7.26377	4.92788
arahy.4PD0PP	ZH16_S1_vs_ZH6_S1;ZH16_S2_vs_ZH6_S2	--	photosystem I reaction center subunit V	10.2625	9.57901	60.1286	16.6652	31.6864	39.6832	58.0957	17.7092
arahy.VYJ22Y	ZH16_S1_vs_ZH6_S1;ZH16_S3_vs_ZH6_S3	--	putative indole-3-acetic acid-amido synthetase GH3.9	0.118034	2.83473	0.0506179	0	0.89004	5.92142	0.651578	0
Novel04536	ZH16_S1_vs_ZH6_S1;ZH16_S4_vs_ZH6_S4	--	Copia protein, partial [Glycine soja]	0	1.14357	0.130404	0	2.99312	2.02709	0.448042	0.340424
Novel03141	ZH16_S1_vs_ZH6_S1;ZH16_S2_vs_ZH6_S2	--	PREDICTED: uncharacterized protein LOC100809536 [Glycine max]	13.7078	2.86837	16.242	15.9713	36.483	6.86214	14.1563	13.3114
arahy.L53237	ZH16_S1_vs_ZH6_S1;ZH16_S3_vs_ZH6_S3	--	Transmembrane amino acid transporter family protein	2.93116	38.7192	1.78981	0.8961	7.00896	26.9425	5.20119	0.732846
arahy.0PE2EF	ZH16_S1_vs_ZH6_S1;ZH16_S2_vs_ZH6_S2	--	nitrate transporter 1.7	1.20247	0.878764	2.28725	0.927955	5.20594	5.61327	1.87272	1.45364
arahy.PNJ0EQ	ZH16_S1_vs_ZH6_S1;ZH16_S4_vs_ZH6_S4	--	ATP sulfurylase 1	0.146959	18.2102	17.6699	11.2558	1.65758	33.039	35.7595	31.9598
Novel03335	ZH16_S3_vs_ZH6_S3;ZH16_S4_vs_ZH6_S4	--	PREDICTED: micronuclear linker histone polyprotein-like isoform X1 [Glycine max]>gi|571553863|ref|XP_006603894.1| PREDICTED: micronuclear linker histone polyprotein-like isoform X2 [Glycine max]	0.0198757	6.01737	2.01182	2.91192	0.0280648	4.96529	6.59437	7.08731
arahy.4L58E6	ZH16_S1_vs_ZH6_S1;ZH16_S2_vs_ZH6_S2	--	putative nuclease HARBI1-like [Glycine max]	0	0	0	0	0.484934	0.970568	0.43296	0.267167
arahy.01D2LU	ZH16_S1_vs_ZH6_S1;ZH16_S2_vs_ZH6_S2	--	U-box domain-containing protein 12-like isoform X3 [Glycine max]	5.47522	3.77901	2.95106	3.60109	21.8344	7.6885	6.09435	6.34104
arahy.DL173G	ZH16_S1_vs_ZH6_S1;ZH16_S2_vs_ZH6_S2	--	Octicosapeptide/Phox/Bem1p family protein	6.57937	6.7185	98.0435	41.0338	29.5107	20.5849	57.925	36.4993
arahy.VUGA5D	ZH16_S1_vs_ZH6_S1;ZH16_S2_vs_ZH6_S2	GRAS	protein SCARECROW-like [Glycine max]	0.217261	0.93224	4.7001	3.35715	0.902322	4.3509	4.43202	3.60299
arahy.TH8K2R	ZH16_S1_vs_ZH6_S1;ZH16_S2_vs_ZH6_S2	--	protein YLS7 [Glycine max]	40.1924	1.73821	8.86727	1.99883	146.12	4.48004	10.5627	4.22673
arahy.S5Z9V6	ZH16_S3_vs_ZH6_S3;ZH16_S4_vs_ZH6_S4	--	Protein kinase superfamily protein	3.7044	7.98209	4.04854	3.81928	4.82711	11.5417	8.96519	7.78876
arahy.MGS08G	ZH16_S1_vs_ZH6_S1;ZH16_S2_vs_ZH6_S2	--	Disease resistance protein (TIR-NBS-LRR class) family	1.1873	1.32195	0.52716	0.41848	2.8269	2.93719	0.822614	0.337759
arahy.0N85F7	ZH16_S1_vs_ZH6_S1;ZH16_S2_vs_ZH6_S2	--	HXXXD-type acyl-transferase family protein	3.46077	6.51693	4.39874	1.00812	8.51982	15.3923	3.26664	0.388438
arahy.5QZF0A	ZH16_S1_vs_ZH6_S1;ZH16_S4_vs_ZH6_S4	--	2-oxoglutarate (2OG) and Fe(II)-dependent oxygenase superfamily protein	1.24881	11.5778	3.31366	8.02682	2.61655	7.68031	6.4742	15.4424
arahy.U7HMBF	ZH16_S1_vs_ZH6_S1;ZH16_S3_vs_ZH6_S3	TF	transcription factor bHLH74-like [Glycine max]	17.4344	7.49859	1.90887	2.79787	38.3059	11.1908	4.82035	4.58702
arahy.QFP1EL	ZH16_S2_vs_ZH6_S2;ZH16_S3_vs_ZH6_S3	--	cytochrome B5-like protein	0	3.91401	0.0537358	0	0.0216876	12.7341	1.85979	0
arahy.9T187T	ZH16_S1_vs_ZH6_S1;ZH16_S3_vs_ZH6_S3	--	Cytochrome P450 superfamily protein	0.047882	160.235	0.250638	0.0853581	2.06912	59.4608	8.58115	0.140746
arahy.LM2DEJ	ZH16_S1_vs_ZH6_S1;ZH16_S2_vs_ZH6_S2	--	U-box domain-containing protein 17-like [Glycine max]	18.1961	1.23187	5.10564	2.34816	55.966	4.22938	4.18648	2.69565
arahy.BE5MC1	;ZH16_S2_vs_ZH6_S2;ZH16_S3_vs_ZH6_S3	--	vacuolar cation/proton exchanger 3	108.079	25.7594	4.31951	1.84873	43.2601	72.522	12.81	0.632184
arahy.THQ7Q1	ZH16_S3_vs_ZH6_S3;ZH16_S4_vs_ZH6_S4	--	2-oxoglutarate (2OG) and Fe(II)-dependent oxygenase superfamily protein	0.580803	4.40036	2.24847	2.16683	0.785616	6.42744	5.17815	4.54624
arahy.JCK56G	ZH16_S1_vs_ZH6_S1;ZH16_S2_vs_ZH6_S2	--	Unknown protein	0.487283	3.38455	13.6233	23.7086	3.50346	16.1547	7.69748	30.2618
arahy.W3HBVG	ZH16_S3_vs_ZH6_S3;ZH16_S4_vs_ZH6_S4	--	protein pelota-like [Glycine max]	3.94878	8.49386	2.97357	2.82772	3.68016	9.58634	7.81456	6.65614
arahy.SWS1EB	ZH16_S1_vs_ZH6_S1;ZH16_S4_vs_ZH6_S4	--	PEBP (phosphatidylethanolamine-binding protein) family protein	1.70236	0.959704	7.25543	2.96735	5.15174	1.88736	9.91171	7.53137
arahy.H1080P	ZH16_S1_vs_ZH6_S1;ZH16_S2_vs_ZH6_S2	--	kelch repeat F-box protein	2.88615	1.96647	47.4851	16.7403	10.5942	7.12862	66.9986	16.9973
arahy.DWSH38	ZH16_S1_vs_ZH6_S1;ZH16_S2_vs_ZH6_S2	TALE	BEL1-like homeodomain protein 1-like isoform X4 [Glycine max]	1.2167	0.285914	8.36302	8.66915	5.47102	1.29065	7.54909	7.82164
arahy.4335NN	ZH16_S1_vs_ZH6_S1;ZH16_S2_vs_ZH6_S2	--	DnaJ heat shock amine-terminal domain protein	0.373405	0.405119	1.62109	1.49928	1.77286	1.75627	1.63977	1.87674
arahy.LG2KGR	ZH16_S2_vs_ZH6_S2;ZH16_S3_vs_ZH6_S3	--	Unknown protein	0	0.319229	0.113355	0.163095	0.568782	5.01614	2.88011	1.72999
arahy.95DHJ9	ZH16_S1_vs_ZH6_S1;ZH16_S2_vs_ZH6_S2	GRF	growth-regulating factor 7	0.0229855	0.512776	9.71764	10.6815	0.272889	2.0419	8.85761	8.62884
arahy.TD6B9U	ZH16_S2_vs_ZH6_S2;ZH16_S4_vs_ZH6_S4	--	protein kinase family protein	14.2806	13.6382	10.5789	7.94979	27.9817	27.6154	21.6326	15.4304
arahy.ZAA1VW	ZH16_S2_vs_ZH6_S2;ZH16_S3_vs_ZH6_S3	--	isoflavone reductase-like [Glycine max]	0	0.983184	2.0554	3.81042	0.0734814	3.14168	5.31302	5.91961
arahy.0YB7S3	ZH16_S2_vs_ZH6_S2;ZH16_S3_vs_ZH6_S3	--	peptide transporter 1	49.7878	0.934033	0.44954	0.123712	57.3717	5.84309	1.42559	0.553259
arahy.66N4V9	ZH16_S1_vs_ZH6_S1;ZH16_S3_vs_ZH6_S3	--	Auxin efflux carrier family protein	3.75546	9.2502	0.239341	0.517097	15.3484	5.2639	1.18875	0.639099
arahy.71RM0H	ZH16_S1_vs_ZH6_S1;ZH16_S3_vs_ZH6_S3	--	glucan endo-1,3-beta-D-glucosidase-like [Glycine max]	10.4212	15.8968	2.97469	0.831589	22.2877	13.4567	13.4861	1.97097
arahy.5HK9J1	ZH16_S1_vs_ZH6_S1;ZH16_S2_vs_ZH6_S2	--	serine carboxypeptidase-like 31	0.0593144	0.132266	0.625732	0.541033	1.43175	0.808062	2.0401	1.74513
arahy.I4LFHL	ZH16_S2_vs_ZH6_S2;ZH16_S4_vs_ZH6_S4	--	RNA-binding protein 39-like [Glycine max]	1.33634	6.88332	5.5736	3.20374	2.07922	13.856	11.0163	6.29943
arahy.FDUH0H	ZH16_S1_vs_ZH6_S1;ZH16_S2_vs_ZH6_S2	--	4-hydroxyphenylpyruvate dioxygenase	27.7813	15.171	47.8277	27.9147	66.7516	59.1553	34.0177	17.1431
arahy.1Z4Q40	ZH16_S3_vs_ZH6_S3;ZH16_S4_vs_ZH6_S4	--	late embryogenesis abundant protein B19.1A	0.123737	0.921817	9.43782	0.422104	0.0612096	0.962162	184.214	485.115
arahy.H5WQ1T	ZH16_S1_vs_ZH6_S1;ZH16_S2_vs_ZH6_S2	--	serine carboxypeptidase-like 50	0.692854	0.22706	2.66779	4.13614	8.71962	1.30675	1.64076	1.85091
arahy.90NIGC	ZH16_S1_vs_ZH6_S1;ZH16_S4_vs_ZH6_S4	--	N2,N2-dimethylguanosine tRNA methyltransferase	2.72077	6.05516	2.65854	1.67839	5.80486	11.4904	5.45309	4.33376
arahy.YAY0HW	;ZH16_S2_vs_ZH6_S2;ZH16_S4_vs_ZH6_S4	--	terpene synthase 04	1.87675	2.24869	37.8846	20.6988	0.817059	6.44113	69.7886	65.4359
Novel04322	ZH16_S3_vs_ZH6_S3;ZH16_S4_vs_ZH6_S4	--	P-loop nucleoside triphosphate hydrolase superfamily protein [Medicago truncatula]	0	0.0937254	0	0	0.379068	0.713038	1.25299	3.10589
arahy.B35K79	ZH16_S3_vs_ZH6_S3;ZH16_S4_vs_ZH6_S4	--	2-oxoglutarate (2OG) and Fe(II)-dependent oxygenase superfamily protein	1.11971	11.2428	0.513652	0.286946	2.5777	23.9601	3.86367	1.83885
arahy.5SXX56	ZH16_S2_vs_ZH6_S2;ZH16_S4_vs_ZH6_S4	--	alpha-amylase-like 2	20.2195	9.73642	12.7357	8.71953	24.6727	23.1644	19.53	17.5654
Novel01826	ZH16_S1_vs_ZH6_S1;ZH16_S2_vs_ZH6_S2	AP2-EREBP	DREB2 [Sophora moorcroftiana]	2.57341	2.3595	520.151	400.759	7.78947	7.91419	392.537	416.932
arahy.90KKXU	ZH16_S1_vs_ZH6_S1;ZH16_S2_vs_ZH6_S2	--	Zinc finger (C3HC4-type RING finger) family protein	0.605317	0.471977	3.242	2.06871	2.07565	1.61435	2.68188	1.84497
Novel01325	ZH16_S1_vs_ZH6_S1;ZH16_S3_vs_ZH6_S3	--	--	0.254721	0.972915	0.0639082	0.0552639	5.74092	6.48158	1.86265	1.51921
arahy.P712FB	ZH16_S1_vs_ZH6_S1;ZH16_S2_vs_ZH6_S2	--	nudix hydrolase homolog 18	3.00836	3.72737	53.8027	62.4276	7.3268	13.157	72.9919	102.439
arahy.EK4LKE	ZH16_S1_vs_ZH6_S1;ZH16_S4_vs_ZH6_S4	--	U3 small nucleolar RNA-associated-like protein	0.925234	6.60634	6.19404	2.98559	3.4893	12.3251	10.3633	9.13907
arahy.81VLYB	ZH16_S1_vs_ZH6_S1;ZH16_S2_vs_ZH6_S2	--	receptor-like kinase	0.855535	0.965241	41.2353	8.51049	12.7935	4.1682	58.3763	6.14603
arahy.VDG15V	ZH16_S1_vs_ZH6_S1;ZH16_S2_vs_ZH6_S2	--	Octicosapeptide/Phox/Bem1p family protein	0.46766	0.0949715	7.3091	11.2612	2.18002	1.13068	7.62871	8.75863
arahy.N95DZF	ZH16_S1_vs_ZH6_S1;ZH16_S2_vs_ZH6_S2	--	probable pectinesterase/pectinesterase inhibitor 6-like [Glycine max]	0.177875	0.271265	101.161	288.216	0.961302	0.989847	138.836	208.56
arahy.0C6ZNN	ZH16_S1_vs_ZH6_S1;ZH16_S2_vs_ZH6_S2	--	laccase 14	0.0826185	4.15445	8.87317	16.8568	0.280604	8.34045	11.286	12.3425
arahy.U4RKM8	ZH16_S1_vs_ZH6_S1;ZH16_S2_vs_ZH6_S2	--	60S ribosome subunit biogenesis NIP7-like protein	5.26792	20.7088	18.9238	13.2864	11.1837	61.8373	32.0918	25.7678
arahy.YS5TEC	ZH16_S1_vs_ZH6_S1;ZH16_S2_vs_ZH6_S2	--	peptide transporter 1	3.42088	8.59083	7.83211	4.00374	13.052	18.043	6.69243	2.95901
arahy.IE6A37	ZH16_S1_vs_ZH6_S1;ZH16_S2_vs_ZH6_S2	--	Protein kinase superfamily protein	39.0116	0.361143	1.6795	1.41504	98.877	1.01266	1.30875	1.18778
arahy.39T2MF	ZH16_S2_vs_ZH6_S2;ZH16_S3_vs_ZH6_S3	--	disease resistance protein (TIR-NBS-LRR class), putative	1.2698	0.154126	0.12134	0.529658	1.58622	1.31154	0.775725	1.36539
Novel04915	ZH16_S2_vs_ZH6_S2;ZH16_S4_vs_ZH6_S4	--	--	2.57711	1.62086	3.63415	0.478445	4.51919	6.00326	6.37518	3.83291
arahy.GFD9N3	ZH16_S1_vs_ZH6_S1;ZH16_S2_vs_ZH6_S2	--	MLP-like protein 43	0.798043	2.45219	10.4206	1.6926	5.00564	9.29656	3.62825	0.348732
arahy.E7QEAV	ZH16_S1_vs_ZH6_S1;ZH16_S2_vs_ZH6_S2	--	Unknown protein	2.05257	4.34446	18.1562	7.38368	5.49986	10.6115	14.5885	6.53473
arahy.LX0UPC	ZH16_S1_vs_ZH6_S1;ZH16_S2_vs_ZH6_S2	--	serine carboxypeptidase-like 31	0.0825277	1.2198	9.75914	4.94654	0.486917	4.47916	13.0265	7.91751
arahy.64U7NV	ZH16_S1_vs_ZH6_S1;ZH16_S2_vs_ZH6_S2	--	cytochrome P450, family 710, subfamily A, polypeptide 1	4.70453	2.09307	2.6551	2.96428	18.1206	5.81854	3.09972	2.38704
arahy.B9QMIW	ZH16_S1_vs_ZH6_S1;ZH16_S2_vs_ZH6_S2	CO-like	zinc finger protein CONSTANS-LIKE 4-like [Glycine max]	17.1249	9.67712	27.9749	13.7249	49.1328	30.4097	26.8371	12.9708
arahy.TJ20XM	ZH16_S1_vs_ZH6_S1;ZH16_S2_vs_ZH6_S2	Orphans	protein DA1-related 1-like isoform X4 [Glycine max]	7.22572	0.633723	6.01522	5.82183	14.6332	1.83944	10.0658	7.39329
arahy.36J0CP	ZH16_S2_vs_ZH6_S2;ZH16_S3_vs_ZH6_S3	--	Unknown protein	0.621272	0.701446	0.857661	0.98017	3.29097	7.76518	6.92964	6.13545
arahy.6TI0EB	ZH16_S1_vs_ZH6_S1;ZH16_S3_vs_ZH6_S3	--	Rubber elongation factor protein (REF)	9.53017	29.2285	12.0695	4.90981	22.4655	38.176	29.3911	7.76019
arahy.U1WPAQ	ZH16_S1_vs_ZH6_S1;ZH16_S2_vs_ZH6_S2	--	Phosphate-responsive 1 family protein	126.829	1.60791	8.09781	2.293	295.242	5.82318	3.83514	0.36397
arahy.K8VWCH	ZH16_S1_vs_ZH6_S1;ZH16_S2_vs_ZH6_S2	TF	CCAAT-binding transcription factor	0.49787	5.98182	19.9502	8.30897	1.88971	16.6501	17.3757	5.69218
arahy.19AV4Q	ZH16_S2_vs_ZH6_S2;ZH16_S3_vs_ZH6_S3	--	Uncharacterised conserved protein UCP015417, vWA	0.726145	3.63709	0.974466	0.705636	0.834255	11.2829	3.16745	0.861271
arahy.8TSI1S	ZH16_S1_vs_ZH6_S1;ZH16_S4_vs_ZH6_S4	--	p-hydroxybenzoic acid efflux pump subunit aaeB n=1 Tax=Medicago truncatula RepID=G7IHP1_MEDTR	0.0153824	0.0592513	1.15273	0.274261	0.357595	0.330207	1.46119	1.20731
arahy.I7WXBP	ZH16_S1_vs_ZH6_S1;ZH16_S2_vs_ZH6_S2	--	4-hydroxyphenylpyruvate dioxygenase	11.8174	3.36219	31.1527	25.7128	33.573	16.888	21.6883	13.9316
Novel01300	ZH16_S1_vs_ZH6_S1;ZH16_S2_vs_ZH6_S2	--	BnaA04g03450D [Brassica napus]	0.230969	1.28232	0.936409	0.629938	1.8308	7.12869	2.12721	2.29301
arahy.0E68DR	ZH16_S3_vs_ZH6_S3;ZH16_S4_vs_ZH6_S4	--	Late embryogenesis abundant protein, group 1 protein	0	0.0657042	10.7859	8.78658	0.116979	0.611389	25.7453	29.3996
arahy.Q32PIX	ZH16_S1_vs_ZH6_S1;ZH16_S2_vs_ZH6_S2	--	Protein phosphatase 2C family protein	16.4173	5.80616	11.4726	6.53214	37.5461	12.6026	10.9388	7.01077
arahy.50EDPB	ZH16_S1_vs_ZH6_S1;ZH16_S2_vs_ZH6_S2	--	Unknown protein	0.943333	1.7519	4.59192	2.23499	4.69701	10.9079	5.60731	3.6187
Novel02287	ZH16_S1_vs_ZH6_S1;ZH16_S2_vs_ZH6_S2	--	wound-induced protein 1-like protein [Phaseolus vulgaris]	5.69148	1.19001	3.87153	6.66299	17.5555	4.48512	6.576	10.5638
arahy.5G1BL4	ZH16_S1_vs_ZH6_S1;ZH16_S2_vs_ZH6_S2	--	alpha/beta-Hydrolases superfamily protein	1.50589	0.733217	1.06923	1.50475	5.81583	1.79309	1.63334	2.21271
arahy.DW36QZ	ZH16_S1_vs_ZH6_S1;ZH16_S2_vs_ZH6_S2	--	ATP binding microtubule motor family protein	0.0147368	0.174294	0.051105	0.0721574	0.383263	5.55499	0.29401	0.0777651
arahy.WVAI17	ZH16_S2_vs_ZH6_S2;ZH16_S3_vs_ZH6_S3	TF	myb transcription factor	11.2542	1.39563	1.58829	1.59967	21.8293	3.88438	4.43334	2.28568
arahy.L1Q7MY	ZH16_S1_vs_ZH6_S1;ZH16_S3_vs_ZH6_S3	--	DUF1764 domain protein	0.314777	4.1137	1.34379	3.45529	1.52501	9.22778	6.07333	3.98312
arahy.AKH4BK	ZH16_S3_vs_ZH6_S3;ZH16_S4_vs_ZH6_S4	--	replication protein A 70 kDa DNA-binding subunit C-like [Glycine max]	0.0574773	5.32354	0.202133	0.0438888	0.0473899	5.46523	0.967303	0.593135
arahy.4S0H6B	ZH16_S1_vs_ZH6_S1;ZH16_S2_vs_ZH6_S2	--	cyclic nucleotide-gated ion channel protein, putative	17.9874	25.6968	44.9415	27.9964	40.9229	77.8386	39.6657	31.7967
arahy.S3DBMV	ZH16_S1_vs_ZH6_S1;ZH16_S2_vs_ZH6_S2	LBD	LOB domain-containing protein 38	0.139944	5.78485	19.5938	5.0033	1.72783	19.3142	11.6027	3.49809
arahy.T7DX97	ZH16_S1_vs_ZH6_S1;ZH16_S4_vs_ZH6_S4	--	galactinol synthase 1	9.47255	0.554916	3.72582	2.09926	23.8289	1.1197	5.8561	5.2548
arahy.MEP9PF	ZH16_S1_vs_ZH6_S1;ZH16_S2_vs_ZH6_S2	--	Unknown protein	0.236349	1.28509	1.40444	0.455696	1.38827	5.77498	3.05301	2.09754
arahy.E19FPK	ZH16_S3_vs_ZH6_S3;ZH16_S4_vs_ZH6_S4	--	RNA binding (RRM/RBD/RNP motifs) family protein	31.8168	135.876	58.1844	32.3409	45.1845	232.629	120.266	68.8033
arahy.4N1P2Y	ZH16_S1_vs_ZH6_S1;ZH16_S2_vs_ZH6_S2	--	chitinase A	0.0988533	0.285656	0.621546	0.21308	1.46937	2.32071	0.989522	0.772786
arahy.VWK9E1	ZH16_S3_vs_ZH6_S3;ZH16_S4_vs_ZH6_S4	--	ACT domain repeat 4	3.65488	7.7731	2.89616	2.09177	6.77799	11.1897	6.30747	5.27311
arahy.PQY635	ZH16_S1_vs_ZH6_S1;ZH16_S2_vs_ZH6_S2	--	Unknown protein	0	0	0.276263	0	2.43939	10.4204	6.3741	3.05683
arahy.D1ITL5	ZH16_S1_vs_ZH6_S1;ZH16_S2_vs_ZH6_S2	--	beta glucosidase 12	0.4775	2.52091	4.14753	0.697513	1.24241	6.34005	2.10297	0.273395
arahy.1B2Z8C	ZH16_S1_vs_ZH6_S1;ZH16_S2_vs_ZH6_S2	TF	bZIP family transcription factor	8.28322	1.46802	8.79792	10.9018	22.7787	3.5952	5.75993	6.0872
arahy.6766IL	ZH16_S2_vs_ZH6_S2;ZH16_S4_vs_ZH6_S4	--	Heavy metal transport/detoxification superfamily protein	2.5364	0.0671195	0.0528358	0	6.55856	0.81242	0.382338	1.07063
Novel01582	ZH16_S2_vs_ZH6_S2;ZH16_S3_vs_ZH6_S3	--	--	0	0	0	0	0.109031	0.654287	0.591725	0.291944
arahy.U6SX92	ZH16_S1_vs_ZH6_S1;ZH16_S2_vs_ZH6_S2	--	sigma factor sigb regulation rsbq-like protein	2.19422	3.31293	13.8116	6.89407	7.36343	14.1173	9.42318	6.35491
Novel03543	ZH16_S2_vs_ZH6_S2;ZH16_S3_vs_ZH6_S3	--	PREDICTED: protein phosphatase 2C 29 isoform X2 [Cicer arietinum]	0	0	0	0	0.370385	3.22815	1.66384	0.565714
arahy.F66B8V	ZH16_S1_vs_ZH6_S1;ZH16_S2_vs_ZH6_S2	--	Unknown protein	0	0	0.338536	0	2.0263	2.04635	1.81414	0
arahy.5VJG10	ZH16_S2_vs_ZH6_S2;ZH16_S4_vs_ZH6_S4	--	Unknown protein	1.70135	1.00018	6.32469	1.30944	2.27834	15.562	9.54206	7.22012
arahy.27E6QC	ZH16_S1_vs_ZH6_S1;ZH16_S2_vs_ZH6_S2	--	Cell wall protein Exp4 n=1 Tax=Mirabilis jalapa RepID=Q84L38_MIRJA	299.482	1.22658	5.19918	2.58059	738.421	4.66808	7.36708	1.49513
arahy.A4KSPL	ZH16_S1_vs_ZH6_S1;ZH16_S2_vs_ZH6_S2	TRAF	ankyrin repeat protein	3.74146	0.107272	0.918549	0.807096	7.55891	0.537892	0.571933	0.70458
arahy.N8RR3Y	ZH16_S1_vs_ZH6_S1;ZH16_S2_vs_ZH6_S2	TF	trihelix transcription factor GT-2-like [Glycine max]	3.0118	0	0.304553	0.284721	53.8037	0.327703	0.631568	0.269045
arahy.ZSL5GJ	ZH16_S1_vs_ZH6_S1;ZH16_S3_vs_ZH6_S3	--	Protein of unknown function, DUF642	1.04998	0.0901911	0	0.421317	3.28035	0.0783409	0.318019	0.64796
arahy.22APIL	ZH16_S2_vs_ZH6_S2;ZH16_S4_vs_ZH6_S4	--	ADP-ribosylation factor GTPase-activating protein AGD10	0	0	0.306566	0	0.16149	2.16987	1.51729	2.77704
arahy.54SJKS	ZH16_S1_vs_ZH6_S1;ZH16_S2_vs_ZH6_S2	--	Protein of unknown function, DUF642	1.88532	0.866112	4.57344	0.858833	4.05586	1.8934	5.48213	0.750314
arahy.H7T4NQ	ZH16_S1_vs_ZH6_S1;ZH16_S2_vs_ZH6_S2	TF	myb transcription factor	0.108931	6.42088	17.0859	9.47017	2.0514	22.329	26.3679	14.9823
arahy.CZ5T9B	ZH16_S2_vs_ZH6_S2;ZH16_S4_vs_ZH6_S4	--	uncharacterized protein LOC100785302 isoform X1 [Glycine max]	2.2356	1.81564	3.45394	2.46889	3.98917	4.91733	8.05529	6.74805
arahy.L0E6EB	ZH16_S2_vs_ZH6_S2;ZH16_S4_vs_ZH6_S4	--	early nodulin-like protein 12	0.655549	0	3.73729	0	2.82379	6.32671	6.17888	6.48831
arahy.7WR3XG	ZH16_S1_vs_ZH6_S1;ZH16_S2_vs_ZH6_S2	--	UDP-Glycosyltransferase superfamily protein	0.495022	2.59079	1.76478	1.52931	2.20958	6.3671	1.71368	1.15279
arahy.9X1AFC	ZH16_S1_vs_ZH6_S1;ZH16_S2_vs_ZH6_S2	--	receptor-like kinase	1.27883	0.820361	1.27136	0.224585	17.8838	3.78016	2.0157	0.490977
arahy.ZIP96M	ZH16_S3_vs_ZH6_S3;ZH16_S4_vs_ZH6_S4	--	Seed maturation protein	0	0.443291	1.07219	3.3522	0.0179439	0.535777	3.39341	14.364
arahy.HAAQ2S	ZH16_S1_vs_ZH6_S1;ZH16_S3_vs_ZH6_S3	--	MACPF domain-containing protein At4g24290-like isoform X3 [Glycine max]	0.874788	4.4543	3.10943	0.589864	2.94866	3.96884	8.42285	1.22365
arahy.QY5N6S	ZH16_S1_vs_ZH6_S1;ZH16_S2_vs_ZH6_S2	C2H2	zinc finger protein MAGPIE-like [Glycine max]	0.168588	0.229166	1.37969	1.63969	1.07384	1.14586	2.4283	2.35628
arahy.FDTJ9Q	ZH16_S2_vs_ZH6_S2;ZH16_S3_vs_ZH6_S3	--	auxin transport protein (BIG)	7.84904	12.4354	10.8849	11.4096	15.0316	33.6348	23.5983	19.45
Novel02046	ZH16_S1_vs_ZH6_S1;ZH16_S4_vs_ZH6_S4	--	--	0.0372249	0.30811	0.086625	0.337351	1.71395	0.590553	0.983933	2.82251
arahy.E0X5DU	ZH16_S1_vs_ZH6_S1;ZH16_S2_vs_ZH6_S2	TF	CCAAT-binding transcription factor	0.543144	5.35961	18.4501	7.19993	1.58706	12.9103	17.377	6.8032
arahy.C2TUDX	ZH16_S2_vs_ZH6_S2;ZH16_S4_vs_ZH6_S4	--	MATE efflux family protein	0	0	0.543743	0	0.20981	5.08437	2.6855	3.86524
arahy.D788HE	ZH16_S1_vs_ZH6_S1;ZH16_S2_vs_ZH6_S2	ARR-B	two-component response regulator-like APRR2-like isoform X2 [Glycine max]	0.851418	0.625843	14.5722	10.4129	4.36806	3.35058	12.8012	10.4515
arahy.7VK1KP	ZH16_S1_vs_ZH6_S1;ZH16_S2_vs_ZH6_S2	--	S-adenosyl-L-methionine-dependent methyltransferases superfamily protein	0.368461	0.788104	0.360048	0.189961	2.4432	3.47967	1.1288	0.893866
arahy.28FBJ8	ZH16_S2_vs_ZH6_S2;ZH16_S3_vs_ZH6_S3	--	unknown protein	0.439571	2.39625	11.9099	4.85897	1.28014	5.66062	26.5417	5.9653
arahy.RH103U	ZH16_S2_vs_ZH6_S2;ZH16_S4_vs_ZH6_S4	--	decarboxylating-like 6-phosphogluconate dehydrogenase	46.7018	20.4886	17.1094	7.44745	83.4218	54.7271	27.2336	15.9857
arahy.PRYL24	ZH16_S1_vs_ZH6_S1;ZH16_S4_vs_ZH6_S4	--	exocyst complex component sec10	6.1373	12.2141	7.30744	4.00525	23.642	18.2872	11.0949	7.85838
arahy.GG2EN1	ZH16_S1_vs_ZH6_S1;ZH16_S2_vs_ZH6_S2	--	BTB/POZ domain-containing protein [Glycine max]	0.932639	1.33373	1.96828	1.22217	5.51915	3.78417	1.87867	0.967912
arahy.AVLU3S	ZH16_S1_vs_ZH6_S1;ZH16_S2_vs_ZH6_S2	ARF	auxin response factor 9	0.130046	3.71948	13.4184	7.29208	0.462138	8.16862	10.0253	6.48076
arahy.M088MF	ZH16_S2_vs_ZH6_S2;ZH16_S3_vs_ZH6_S3	--	Unknown protein	0	0.121908	0.264373	0.155708	0	116.85	16.1189	0.103574
arahy.XPR4K7	ZH16_S1_vs_ZH6_S1;ZH16_S2_vs_ZH6_S2	--	ATP-binding ABC transporter	2.35086	0.582258	2.17777	1.11287	5.34975	1.86376	0.642644	0.333669
arahy.BK04FV	ZH16_S1_vs_ZH6_S1;ZH16_S2_vs_ZH6_S2	--	Cytochrome P450 superfamily protein	2.13073	3.27377	3.74864	0.323729	19.1621	9.88718	3.05597	0.343649
arahy.HI2JIU	ZH16_S1_vs_ZH6_S1;ZH16_S2_vs_ZH6_S2	--	glutamate synthase 1	8.39987	2.51877	1.0138	1.07657	24.5555	5.01266	1.5922	0.896544
arahy.KNM3C9	ZH16_S1_vs_ZH6_S1;ZH16_S2_vs_ZH6_S2	--	short-chain dehydrogenase-reductase B	1.07977	0.954901	0.99158	0.706937	4.18273	3.53198	1.21501	0.431878
arahy.QU53NP	ZH16_S2_vs_ZH6_S2;ZH16_S4_vs_ZH6_S4	--	Wound-responsive family protein	0.747887	0.233749	0.554526	0.232218	1.49732	6.16478	4.24358	3.67009
arahy.NB98VA	ZH16_S2_vs_ZH6_S2;ZH16_S3_vs_ZH6_S3	--	cytokinin oxidase/dehydrogenase 1	0	0.34983	0.0248355	0.0749278	0.220518	51.3063	6.79512	0.22974
arahy.ST1ALI	ZH16_S1_vs_ZH6_S1;ZH16_S2_vs_ZH6_S2	--	4-coumarate:CoA ligase 2	14.6722	4.79336	14.9742	8.13271	32.6535	9.74717	10.1448	5.01532
arahy.J633C6	ZH16_S1_vs_ZH6_S1;ZH16_S2_vs_ZH6_S2	--	alanine:glyoxylate aminotransferase 3	0.823624	1.32553	1.94833	0.402758	2.14193	5.34763	3.27008	1.31307
arahy.KH9QH8	ZH16_S1_vs_ZH6_S1;ZH16_S2_vs_ZH6_S2	--	ATP binding/protein serine/threonine kinase [Glycine max]	1.58181	0.34988	0.223072	0.230611	9.52787	1.01342	0.214469	0.212193
Novel01165	ZH16_S1_vs_ZH6_S1;ZH16_S2_vs_ZH6_S2	--	geranylgeranyl pyrophosphate synthase [Elaeagnus umbellata]	10.757	9.46976	58.876	36.5296	24.2995	31.6778	45.2652	31.448
arahy.5ZLV04	ZH16_S1_vs_ZH6_S1;ZH16_S2_vs_ZH6_S2	--	cytochrome P450, family 710, subfamily A, polypeptide 1	7.64285	1.9188	2.63824	3.07807	16.7579	5.71804	2.41408	2.87362
arahy.P6VCNZ	ZH16_S1_vs_ZH6_S1;ZH16_S2_vs_ZH6_S2	--	sugar porter (SP) family MFS transporter	5.16157	2.85069	4.37163	1.7658	10.521	7.2962	3.97745	1.00531
arahy.YZF1VD	ZH16_S1_vs_ZH6_S1;ZH16_S2_vs_ZH6_S2	--	Protein kinase superfamily protein	8.80895	11.1695	6.34109	3.02812	19.7225	22.3409	11.4682	5.56303
arahy.4AG551	ZH16_S1_vs_ZH6_S1;ZH16_S2_vs_ZH6_S2	TF	ethylene-responsive transcription factor 12 [Glycine max]	0.532694	0.463456	2.79519	1.09625	3.43356	3.724	2.82919	1.09674
arahy.CPL9KJ	ZH16_S2_vs_ZH6_S2;ZH16_S3_vs_ZH6_S3	--	Oxidoreductase family protein	2.17746	9.03227	1.72543	1.31875	2.09544	21.1671	4.00318	2.31362
arahy.2K4F1W	ZH16_S1_vs_ZH6_S1;ZH16_S2_vs_ZH6_S2	--	probable serine/threonine protein phosphatase 2A regulatory subunit B''delta-like isoform X3 [Glycine max]	0	0.0819625	0.535563	0.0581094	0.40443	1.55341	1.01927	0.469362
arahy.WARQ2S	ZH16_S2_vs_ZH6_S2;ZH16_S4_vs_ZH6_S4	--	prohibitin 7	0.127938	0.0566141	1.89971	0	1.34765	10.2613	5.19582	3.21495
arahy.U60PIC	ZH16_S1_vs_ZH6_S1;ZH16_S3_vs_ZH6_S3	--	NAD(H) kinase 3	1.56307	6.11323	3.61279	3.58204	3.51385	10.9926	8.61191	5.01997
arahy.HZHH6G	ZH16_S3_vs_ZH6_S3;ZH16_S4_vs_ZH6_S4	--	Protein of unknown function (DUF581)	15.3665	21.894	43.2197	8.8402	11.2404	15.5704	100.92	17.3351
arahy.IKLL4G	ZH16_S1_vs_ZH6_S1	--	Signal transduction histidine kinase	0.027591	0.0289285	0.0415455	0.0186224	0.224102	0.217145	0.117328	0.00866005
arahy.KDTA1N	ZH16_S1_vs_ZH6_S1	--	patatin-like protein 6	0.510643	2.18995	5.53091	3.15936	2.55923	3.90956	2.10312	1.31829
Novel01254	ZH16_S4_vs_ZH6_S4	--	BnaC02g30820D [Brassica napus]	0.0632325	0.0607209	0.128368	0.0289806	0.554565	0.38674	0.762376	1.20667
arahy.P3THXV	ZH16_S1_vs_ZH6_S1	--	Hypoxia-responsive family protein	0	2.9657	6.74921	0.692175	0.42377	4.47734	15.9682	1.32566
arahy.XZ22FX	ZH16_S1_vs_ZH6_S1	--	uncharacterized protein LOC100812174 isoform X6 [Glycine max]	2.15429	36.7685	83.5625	81.8325	6.54283	38.7981	76.5859	80.8309
arahy.R5YE9W	ZH16_S1_vs_ZH6_S1	--	uncharacterized protein LOC100803827 [Glycine max]	0.108582	1.04793	0.151958	0.0487527	0.491533	0.779046	0.335928	0.0150395
arahy.WNEW3V	ZH16_S2_vs_ZH6_S2	B3	B3 DNA-binding domain protein	0.126707	11.443	67.7402	47.248	0.197248	27.192	61.3585	42.8155
arahy.KZF81I	ZH16_S1_vs_ZH6_S1	--	early nodulin-related	0.163116	11.1255	78.0511	53.0758	0.681203	13.2073	63.8962	50.3901
arahy.X05KEZ	ZH16_S2_vs_ZH6_S2	--	receptor-like kinase 1	1.68506	3.39004	9.92806	5.526	2.31843	7.68704	5.68314	5.85578
arahy.MMUF9T	ZH16_S1_vs_ZH6_S1	--	23kDa polypeptide of the oxygen evolving complex of photosystem II n=5 Tax=Sonneratia RepID=A9XNJ0_9MYRT	0.568059	7.19287	3.35275	0.650545	2.48135	11.287	5.14695	0.474667
arahy.50G1SM	ZH16_S2_vs_ZH6_S2	--	Glycoprotein membrane precursor GPI-anchored	0.0337023	0.508762	49.2888	21.5283	0	2.62231	65.8091	51.3825
arahy.T0E7SC	ZH16_S2_vs_ZH6_S2	TF	TCP family transcription factor 4	4.8891	8.70536	45.1633	43.8914	3.16364	17.293	37.6061	37.9491
arahy.56FJP3	ZH16_S1_vs_ZH6_S1	--	DNAJ-like 20	5.09678	2.51332	10.3931	6.59387	11.0812	4.53179	7.97274	5.18407
arahy.AW02WS	ZH16_S1_vs_ZH6_S1	--	uncharacterized protein LOC100527109 [Glycine max]	0.0899908	11.8939	1.51457	0.160222	0.838654	11.8686	2.04794	0.051075
arahy.P7B4TL	ZH16_S1_vs_ZH6_S1	--	pleiotropic drug resistance 12	0.221462	0.690925	0.184682	0.0765549	1.83752	0.389509	0.0820023	0.0824996
arahy.X9WDFL	ZH16_S2_vs_ZH6_S2	--	DNAJ-like 20	0.339681	10.119	478.6	403.858	0.133176	26.6144	313.317	219.121
arahy.R55U5A	ZH16_S1_vs_ZH6_S1	NF-YC	nuclear factor Y, subunit C2	0.999726	31.3914	18.5349	6.0924	3.9343	33.1638	13.3241	5.49458
arahy.2F1JWB	ZH16_S4_vs_ZH6_S4	--	putative indole-3-acetic acid-amido synthetase GH3.9	7.96502	2.20516	1.38161	0.374861	15.1901	3.25205	1.89095	1.13322
arahy.LPIU4G	ZH16_S1_vs_ZH6_S1	--	Non-specific lipid-transfer protein, putative	8.19417	0.108153	0.590316	8.42688	32.6439	0	0.571998	3.34159
arahy.TPV64N	ZH16_S3_vs_ZH6_S3	--	Oxidoreductase, short chain dehydrogenase/reductase family protein, expressed n=5 Tax=Oryza RepID=Q2QRE6_ORYSJ	29.7863	0.103689	1.94045	3.47858	26.2827	0.109908	4.52071	5.21166
arahy.85NR4N	ZH16_S2_vs_ZH6_S2	--	hypothetical protein	0.727992	2.65805	30.8739	33.8623	0.534867	7.52073	40.8178	36.9747
Novel00811	ZH16_S2_vs_ZH6_S2	--	PREDICTED: protein ASPARTIC PROTEASE IN GUARD CELL 2-like [Prunus mume]	0.147081	0.80925	19.3616	4.48528	0.428948	5.82367	16.9214	6.67832
arahy.YI7X4S	ZH16_S1_vs_ZH6_S1	--	receptor-like kinase 1	0.016776	4.24954	1.09739	0.394159	0.440309	4.18954	1.57239	0.180395
arahy.FZU8AD	ZH16_S1_vs_ZH6_S1	TF	WRKY family transcription factor	2.91081	0.0199871	0.421168	0.0402879	10.5721	0.240886	0.615591	0.160867
arahy.CE0UAC	ZH16_S4_vs_ZH6_S4	--	remorin-like [Glycine max]	1.21293	0.765913	0.98034	0.363394	0.778288	1.15927	4.95212	6.05246
arahy.2V6C5Z	ZH16_S1_vs_ZH6_S1	--	microtubule-associated protein futsch isoform X8 [Glycine max]	0	7.97779	1.08634	0.224553	0.477163	4.01626	1.68253	0.0490118
arahy.8QP97F	ZH16_S1_vs_ZH6_S1	--	UDP-D-glucose/UDP-D-galactose 4-epimerase 1	57.3127	3.40423	13.4701	6.07074	114.465	4.92624	10.5547	6.43631
arahy.7BH383	ZH16_S2_vs_ZH6_S2	--	Alkyl hydroperoxide reductase/ Thiol specific antioxidant/ Mal allergen n=1 Tax=Gillisia limnaea DSM 15749 RepID=H2BWJ2_9FLAO	0.566152	5.85395	417.608	329.438	1.19489	17.1641	461.636	422.033
arahy.K6JFDD	ZH16_S1_vs_ZH6_S1	--	abnormal spindle-like microcephaly-associated protein homolog isoform X1 [Glycine max]	0.00995146	4.19746	0.695007	0.181555	0.267378	3.04234	1.20868	0.242057
arahy.N6N04K	ZH16_S3_vs_ZH6_S3	--	galactinol synthase 1	0.245684	0.367739	8.39861	57.3466	0.495959	0.203789	21.2943	103.214
arahy.D0M6LR	ZH16_S1_vs_ZH6_S1	--	short-chain dehydrogenase-reductase B	1.02357	0	0.0708712	0.0219432	5.70059	0	0	0
Novel01524	ZH16_S3_vs_ZH6_S3	--	PREDICTED: HUA2-like protein 3-like isoform X4 [Glycine max]	0.267071	5.1503	0.937757	1.3192	1.87265	1.76045	10.0566	2.32108
arahy.I8KQ46	ZH16_S1_vs_ZH6_S1	--	zinc finger (Ran-binding) family protein	0.0507482	5.06017	1.59955	1.86727	0.556094	4.12932	1.88633	1.45934
[truncated: 2,915 more rows]
