# Supplementary material for: Global Transcriptome and Co-Expression Network Analyses Revealed Hub Genes Controlling Seed Size/Weight and/or Oil Content in Peanut
Source: Plants (Basel). 2023 Aug 31;12(17):3144. doi: 10.3390/plants12173144 (PMC10490140; doi:10.3390/plants12173144)
Supplement: Supplementary file 1 [file plants-12-03144-s001.zip › Table S5.xlsx]

## Sheet: Readme
Table S5 Information of reported genes related to regulate seed size/weight and/or oil content in other species.

## Sheet: seed size
Trait	Category	Genename	Species	Function	Reference	Gene ID
	IKU–MINI3–SHB1	IKU1	Arabidopsis	VQ motif-containing protein	Garcia et al., 2003; Wang et al., 2010	AT2G35230
		IKU2	Arabidopsis	Leucine-rich repeat protein kinase family protein	Garcia et al., 2003; Luo et al., 2005	AT3G19700
		MINI3	Arabidopsis	WRKY DNA-binding protein 10	Luo et al., 2005	AT1G55600
		SHB1	Arabidopsis	EXS (ERD1/XPR1/SYG1) family protein	Zhou et al., 2009	AT4G25350
seed size/weight	Transcriptional factors	SoyWRKY15a	Soybean	WRKY family transcription factor	Gu et al., 2017	KY120976
		ANT	Medicago	AP2-like family transcription factor	Confalonieri et al., 2014	AT4g37750
		ANT	Arabidopsis	AP2-like family transcription factor	Elliottet al., 1996; Mizukami and Fischer 2000	AT4G37750
		AP2	Arabidopsis	AP2 family transcription factors	Jofukuet al., 2005; Ohtoet al., 2005	AT4G36920
		SOD7/NGAL2	Arabidopsis	AP2/B3-like transcriptional factor family protein	Zhang et al., 2015	AT3G11580
		DPA4/NGAL3	Arabidopsis	AP2/B3-like transcriptional factor family protein	Zhang et al., 2015	AT5G06250
		BBM	Soybean	AP2 family transcription factors	ElOuakfaoui et al., 2010	HM775856
		GmAP2-1	Soybean	AP2 family transcription factors	Jiang et al., 2020	Glyma01g39520
		GmAP2-4	Soybean	AP2 family transcription factors	Jiang et al., 2020	Glyma13g40470
		GmAP2-6	Soybean	AP2 family transcription factors	Jiang et al., 2020	Glyma08g38190
		Glyma.19g163900	Soybean	AP2 domain protein	Assefa et al., 2019	Glyma.19g163900
		SSH1	Rice	APETALA2-like transcription factor	Jiang et al., 2019	Os07g13170
		BS1	Medicago	TIFY family transcription regulators	Ge et al., 2016	KM668032
		SLB1	Medicago	F-box protein	Yin et al., 2020	Medtr5g097060
		DASH	Medicago	Endosperm-specific DOF transcription factor	Noguero et al., 2015	Medtr2g01406
		AGL61	Arabidopsis	AGAMOUS-like 61 (MADS-box )	Steffen et al., 2008	AT2G24840
		AGL62	Arabidopsis	AGAMOUS-like 62 (MADS-box )	Kang et al., 2008	AT5G60440
		AGL63	Arabidopsis	AGAMOUS-like 63	Prasad et al., 2010	AT1G31140
		TT16/ABS	Arabidopsis	K-box region and MADS-box transcription factor family protein	Nesi et al., 2002	AT5G23260
		PHERES1	Arabidopsis	MADS-box transcription factor family protein	Köhler et al., 2003	AT1G65330
		OsMADS87	Rice	MADS-box family gene with M-gamma type-box	Chen et al., 2016	OS03G38610
		OsMADS29	Rice	MADS-box transcription factor	Y ang et al., 2012	AK109522
		TTG2	Arabidopsis	WRKY family transcription factor family protein	Johnson et al., 2002; Garcia et al., 2005	AT2G37260
		RGE1/ZOU	Arabidopsis	basic helix-loop-helix (bHLH) DNA-binding superfamily protein	Kondou et al., 2008	AT1G49770
		ICE1	Arabidopsis	MYC-like bHLH transcriptional activator	Denay et al., 2014	AT3G26744
		ZmZOU	Maize	basic helix loop helix family of transcription factor	Grimault et al., 2015	GRMZM2G147685
	Phytohormone	PsTAR2	Pea	Aminotransferase	McAdam et al., 2017
		PP2C-1	Soybean	Phosphatase 2C-1	Lu et al., 2017	Glyma17g33690
		GmBZR1	Soybean	Transcription factor of BR signaling pathway	Zhang et al., 2016	Glyma.17G248900
		GA20OX	Soybean	Gibberellin biosynthetic enzymes	Lu et al., 2016	Glyma07g08950
		Glyma.19g151900	Soybean	Hpt domain	Assefa et al., 2019	Glyma.19g151900
		Glyma.17G202700	Soybean	Growth-regulating factor 4	Assefa et al., 2019	Glyma.17G202700
		ARF2	Arabidopsis	Auxin response factor 2	Okushima et al., 2005; Schruff et al., 2006	AT5G62000
		BG1	Rice	Auxin response factor	Liu et al., 2015	OS03G0175800
		AHK2	Arabidopsis	histidine kinase 2 (Cytokinin receptor)	Werner et al., 2003; Riefl er et al., 2006	AT5G35750
		AHK3	Arabidopsis	histidine kinase 3 (Cytokinin receptor)	Werner et al., 2003; Riefl er et al., 2006	AT1G27320
		CRE1/AHK4	Arabidopsis	CHASE domain containing histidine kinase protein (Cytokinin response )	Werner et al., 2003; Riefl er et al., 2006	AT2G01830
		Gn1a/OsCKX2	Rice	Cytokinin oxidase	Ashikari et al., 2005	NM_001048837.1
		BRI1	Arabidopsis	Leucine-rich receptor-like protein kinase family protein (Brassinosteroids insensitive )	Jiang et al., 2013; Zhu et al., 2013a	AT4G39400
		DET2	Arabidopsis	3-oxo-5-alpha-steroid 4-dehydrogenase family protein	Jiang et al., 2013	AT2G38050
		D11	Rice	Brassinosteroids biosynthesis	Zhu et al., 2015	OS04G39430
		GASA4	Arabidopsis	GAST1 protein homolog 4 (Gibberellin regulated protein)	Roxrud et al., 2007	AT5G15230
	Ubiquitin-related	DA1	Arabidopsis	Ubiquitin-activated peptidase	Li et al., 2008	AT1G19270
		DAR1	Arabidopsis	Ubiquitin binding protein family	Li et al., 2008; Peng et al., 2015	AT4G36860
		DA2	Arabidopsis	RING/U-box superfamily protein (mono-ubiquitination)	Xia et al., 2013	AT1G78420
		SOD2/UBP15	Arabidopsis	Ubiquitin-specific protease 15	Du et al., 2014	AT1G17110
		UBP15	Arabidopsis	Ubiquitin-specific protease	Liu et al., 2008; Du et al., 2014	AT1G17110
		EOD1/BB	Arabidopsis	E3 ubiquitin ligase	Disch et al., 2006; Li et al., 2008	AT3G63530
		GW2	Rice	E3 ubiquitin ligase	Song et al., 2007	EF447275
		TaGW2	Wheat	E3 ubiquitin ligase	Su et al., 2011	JN896622,JN896623
		ZmGW2	Maize	E3 ubiquitin ligase	Li et al., 2010	EU968771,FJ573211,EU962093
	Cytochrome P450	KLU	Arabidopsis	CYP78A5	Anastasiou et al., 2007	AT1G13710
		EOD3	Arabidopsis	CYP78A6	Fang et al., 2012	AT2G46660
		DWF4	Arabidopsis	CYP90B	Jiang et al., 2013	AT3G50660
		GE	Rice	CYP78A13	Nagasawa et al., 2013	AB780362
		BG2	Rice	CYP78A13	Xu et al., 2015	OS03G30420
		TaCYP78A3–A	Wheat	CYP78A3	Ma et al., 2015	KP768392
		TaCYP78A3–B	Wheat	CYP78A3	Ma et al., 2015	KP768393
		TaCYP78A3–D	Wheat	CYP78A3	Ma et al., 2015	KP768394
		CYP78A10	Soybean	CYP78A10	Wang et al., 2015	Glyma05g00220
		CYP78A72	Soybean	CYP78A72	Zhao et al., 2016	Glyma19g42940
	G protein	AGG3	Arabidopsis	Arabidopsis G protein gamma subunit 3	Chakravortyet al., 2011;Liet al., 2012	AT5G20635
		GPA1	Arabidopsis	G protein alpha subunit 1	Chakravortyet al., 2011;Liet al., 2012	AT2G26300
		AGB1	Arabidopsis	GTP binding protein beta 1	Chakravortyet al., 2011;Liet al., 2012	AT4G34460
		GS3	Rice	G protein gamma subunit analogues	Huanget al., 2009	DQ355996
	Polycomb group	FIS2	Arabidopsis	VEFS-Box of polycomb protein	Pien and Grossniklaus 2007	AT2G35670
		FIE/FIS3	Arabidopsis	Transducin/WD40 repeat-like superfamily protein	Pien and Grossniklaus 2007	AT3G20740
		MEA/FIS1	Arabidopsis	SET domain-containing protein	Pien and Grossniklaus 2007	AT1G02580
		MSI1	Arabidopsis	Transducin/WD40 repeat-like superfamily protein	Pien and Grossniklaus 2007	AT5G58230
	Others	Glyma.07G196500	Soybean	Phosphate 2	Du et al., 2017	Glyma.07G196500
		SBT1.1	Medicago	Protease-associated, subtilisin	D'Erfurth et al., 2012	AC146561
		CIF1	Soybean	Cell wall invertase inhibitors	Tang et al., 2017	BT090960
		IMP	Chickpea	myo-inositol phosphate synthase	Dwivedi et al., 2017	LOC10149668
		CaABCC3(6)	Chickpea	ABCC3-type ABC transporter	Basu et al., 2019
		GmPSKγ1	Soybean	PSK-like peptide (phytosulfokine)	Yu et al., 2019
		OsAGSW1	Rice	Activity of bc1 complex (ABC1) kinase	Li et al., 2015	OS05G25840
		DEP1	Rice	Phosphatidylethanolamine binding protein	Maoet al., 2010	OS09G26999

## Sheet: oil content
Trait	Category	Genename	Species	Function	Reference
	Fatty acid synthesis	ACCase	Rapeseed, Cotton	Acetyl-CoA carboxylase	Wang et al., 2012; Cui et al., 2017
		FAD2	Rapeseed	Fatty acid dehydrogenase 2	Shi et al., 2017
Seed oil content		FAE1	Rapeseed	Fatty acid elongase 1	Shi et al., 2017
		KAS	Rapeseed	β-ketoacyl-ACP synthase	Stoll et al., 2006
		FAT	Rapeseed	Acyl-ACP thioesterase	Stoll et al., 2006
	TAG synthesis	GPAT	Rapeseed	Glyceral 3-phosphate acyltransferase	Chen et al., 2014
		G3PDH	Rapeseed	Glycerol-3-phosphate dehydrogenase	Vigeolas et al., 2007
		LPAAT	Rapeseed	lysophosphatidic acid acyltransferase	Taylor et al., 2001
		DGAT9	Arabidopsis	Diacylglycerol acyltransferase	Shockey et al., 2016
	Transcription regulation	LEC1	Arabidopsis	Leafy contyledon 1	Shen et al., 2010;
		LEC2	Arabidopsis	Leafy contyledon 2	Angeles et al., 2011
		ABI3	Arabidopsis	AP2/B3-like transcriptional factor family protein	Baud et al., 2009
		FUS3	Arabidopsis	AP2/B3-like transcriptional factor family protein	Baud et al., 2009
		WRI1 (AP2/ERWEBP)	Maize, Rapeseed	Integrase-type DNA-binding superfamily protein	Shen et al., 2010; Wu et al., 2014
		GmDof4	Soybean	DNA binding with one finger，Dof	Wang et al., 2007
		TT8	Rapeseed	Transparent tetsa 8	Zhai et al., 2019
		TT2	Rapeseed	Transparent tetsa 1	Xie et al., 2020
		GLABRA2	Rapeseed	Homeodomain-ZIP transcription factor	Chai et al., 2010
