# Supplementary material for: Global Transcriptome and Co-Expression Network Analyses Revealed Hub Genes Controlling Seed Size/Weight and/or Oil Content in Peanut
Source: Plants (Basel). 2023 Aug 31;12(17):3144. doi: 10.3390/plants12173144 (PMC10490140; doi:10.3390/plants12173144)
Supplement: Supplementary file 1 [file plants-12-03144-s001.zip › Table S6.xlsx]

## Sheet: Readme
Table S6 Information of hub genes within three key modules.

## Sheet: magenta-hub-heatmap
Geneid	log2FoldChange	padj	Module	module-related-trait	gene_sum	kME	kWithin	Chr	start_pos	end_pos	Type	TF	Function	Reference	geneID	ZH16_S1	ZH16_S2	ZH16_S3	ZH16_S4	ZH6_S1	ZH6_S2	ZH6_S3	ZH6_S4	AT_id	identity	Evalue	alignde_aa_length	Symbol	Synonyms	description
arahy.WY3QF4	5.9537	0.0020462	magenta	ZH16_S1;ZH16_S2;	137	0.853594	98.3561	arahy.Tifrunner.gnm2.Arahy.20	11488130	11492031	Transcript factor	AP2/EREBP	Integrase-type DNA-binding superfamily protein		arahy.WY3QF4	0.308147	0.359848	0.238461	0.227262	0.148701	0	0	0	AT4G26090	24.638	1.18e-33	140	RPS2	DISEASE RESISTANCE PROTEIN RPS2|F20B18.200|F20B18_200|RESISTANT TO P. SYRINGAE 2	NB-ARC domain-containing disease resistance protein
arahy.7JHN4J	3.61645	0.000349845	magenta	ZH16_S1;ZH16_S2;	137	0.931541	133.639	arahy.Tifrunner.gnm2.Arahy.04	124950789	124956420	Transcript factor	MADS-box	MADS-box transcription factor family protein		arahy.7JHN4J	49.1387	80.269	19.1691	7.38723	4.27936	1.25662	0.21288	0	AT3G02310	72.549	1.05e-128	365	44806	AGAMOUS-like 4|AGL4|F14P3.4|F14P3_4|SEPALLATA 2|TRANSCRIPTION FACTOR	K-box region and MADS-box transcription factor family protein
arahy.MRFN9C	3.35502	0.00030743	magenta	ZH16_S1;ZH16_S2;	137	0.870196	206.232	arahy.Tifrunner.gnm2.Arahy.14	82147549	82154025	Transcript factor	MYB	myb transcription factor		arahy.MRFN9C	1.06056	3.00871	1.06231	0.66375	0.0800551	0.025572	0.0496805	0	AT5G02320	49.54	4.42e-148	436	MYB3R-5	ARABIDOPSIS THALIANA MYB DOMAIN PROTEIN 3R5|ATMYB3R5|T1E22.80|T1E22_80|myb domain protein 3r-5	myb domain protein 3r-5
arahy.7WY41H	5.90102	2.31726e-05	magenta	ZH16_S1;ZH16_S2;	137	0.924307	150.012	arahy.Tifrunner.gnm2.Arahy.04	125078648	125081116	Transcript factor	TF	transcription factor BIM1-like isoform X2		arahy.7WY41H	7.47118	12.7383	3.59722	2.46016	1.31631	0.182145	0.148524	0	AT5G38860	37.647	4.57e-55	182	BIM3	BES1-interacting Myc-like protein 3|K15E6.40|K15E6_40	BES1-interacting Myc-like protein 3
arahy.V6NF3H	4.22443	5.77024e-06	magenta	ZH16_S1;ZH16_S2;	137	0.954823	115.75	arahy.Tifrunner.gnm2.Arahy.15	106055433	106058959	Transcript factor	WRKY	WRKY family transcription factor family protein		arahy.V6NF3H	7.54728	9.09069	4.17256	2.02165	0.318371	0	0.0538874	0.0981044	AT4G30935	56.944	4.3e-18	82	WRKY32	ATWRKY32|F6I18.160|F6I18_160|WRKY DNA-binding protein 32	WRKY DNA-binding protein 32
arahy.Y7DSHF	2.86338	0.000182137	magenta	ZH16_S1;ZH16_S2;	137	0.954977	130.598	arahy.Tifrunner.gnm2.Arahy.04	123623774	123628574	Transcript factor	WRKY	WRKY family transcription factor family protein		arahy.Y7DSHF	4.39189	3.9505	2.66844	2.46407	0.587636	0.149052	0.0692152	0.0459784	AT2G03340	53.832	2.67e-154	451	WRKY3	T4M8.23|T4M8_23|WRKY DNA-binding protein 3	WRKY DNA-binding protein 3
arahy.D41UNS	2.70602	1.78977e-08	magenta	ZH16_S1;ZH16_S2;	137	0.87029	62.0874	arahy.Tifrunner.gnm2.Arahy.02	53687319	53692926	Transcript factor	PHD	Inhibitor of growth proteins histone-binding protein n=4 Tax=Musca domestica RepID=T1P9R5_MUSDO		arahy.D41UNS	7.63982	5.58395	5.54052	3.29928	1.12843	3.59776	1.28194	0.966277	AT3G24010	75.2	3.4e-58	186	ING1	ARABIDOPSIS THALIANA INHIBITOR OF GROWTH 1|ATING1|INHIBITOR OF GROWTH 1	RING/FYVE/PHD zinc finger superfamily protein
arahy.0IDF8B	1.68336	1.50521e-14	magenta	ZH16_S1;ZH16_S2;	137	0.906198	107.108	arahy.Tifrunner.gnm2.Arahy.13	139561762	139567261	Transcript factor	LSD	LSD1 zinc finger family protein		arahy.0IDF8B	27.5149	18.3471	15.8784	13.6465	8.54685	6.14395	7.07883	4.14905	AT1G32540	76	1.19e-37	123	LOL1	T9G5.1|T9G5_1|lsd one like 1	lsd one like 1
arahy.LFW8SM	3.60069	0.0258447	magenta	ZH16_S1;ZH16_S2;	137	0.926356	183.361	arahy.Tifrunner.gnm2.Arahy.20	17105968	17111085	Transcript factor	FAR1	myosin, putative		arahy.LFW8SM	24.8949	35.1393	22.6219	20.9675	2.22379	0.410073	0.224967	0	AT4G33200	35.417	6.37e-08	51.2	XI-I	ATXI-I|F4I10.130|F4I10_130|MYOSIN XI I|MYOSIN XI-15|XI-15	myosin
arahy.K541B7	2.75334	0.0105182	magenta	ZH16_S1;ZH16_S2;	137	0.912024	148.883	arahy.Tifrunner.gnm2.Arahy.19	22766871	22772935	Phytohormone	--	histidine kinase 1		arahy.K541B7	0.515235	0.914933	0.145758	0.15223	0.0769418	0.0467695	0	0	AT2G47430	38.462	0	647	CKI1	CYTOKININ-INDEPENDENT 1|HISTIDINE KINASE|T30B22.27	Signal transduction histidine kinase
arahy.YR2ABN	3.67826	3.96169e-20	magenta	ZH16_S1;ZH16_S2;	137	0.927902	105.738	arahy.Tifrunner.gnm2.Arahy.10	101283740	101288098	Phytohormone	--	aspartate aminotransferase 3		arahy.YR2ABN	126.034	83.6066	63.0689	41.2085	10.1961	9.65691	8.48548	4.32049	AT5G11520	75.264	0	733	ASP3	ASPARTATE AMINOTRANSFERASE|CHLOROPLAST PRECURSOR|F15N18.110|F15N18_110|YELLOW-LEAF-SPECIFIC GENE 4|YLS4|aspartate aminotransferase 3	aspartate aminotransferase 3
arahy.VY3GX3	4.44782	0.0016593	magenta	ZH16_S1;ZH16_S2;	137	0.961208	165.422	arahy.Tifrunner.gnm2.Arahy.14	82117215	82135201	Ubiquitin-proteasome pathway	--	E3 ubiquitin-protein ligase		arahy.VY3GX3	9.15488	12.2535	4.35636	6.65981	0.45564	0.397296	0.131267	0.0159323	AT5G02310	52.079	0	1900	PRT6	AT5G02300|T1E22.70|T1E22_70|proteolysis 6	proteolysis 6
arahy.2K1FXD	2.9273	0.000527473	magenta	ZH16_S1;ZH16_S2;	137	0.880568	108.835	arahy.Tifrunner.gnm2.Arahy.20	116419945	116422060	Ubiquitin-proteasome pathway	--	E3 ubiquitin-protein ligase KEG-like		arahy.2K1FXD	7.64961	5.84617	1.49975	1.00378	0.956429	0.955127	0.634921	0	AT5G13530	69.697	2.09e-41	149	KEG	KEEP ON GOING|T6I14.60|T6I14_60	protein kinases;ubiquitin-protein ligase
arahy.5G37N1	1.9709	0.0274253	magenta	ZH16_S1;ZH16_S2;	137	0.883907	101.974	arahy.Tifrunner.gnm2.Arahy.04	86373276	86373772	Ubiquitin-proteasome pathway	--	ubiquitin C-terminal hydrolase 3		arahy.5G37N1	10.484	14.0764	4.84235	7.37444	2.64231	3.64376	0.903308	1.4368	AT4G17510	92.857	4.5e-12	57.8	UCH3	DL4790C|FCAALL.31|UBIQUITIN C-TERMINAL HYDROLASE 3|ubiquitin C-terminal hydrolase 3	ubiquitin C-terminal hydrolase 3
arahy.NSV5VW	3.20099	0.00542918	magenta	ZH16_S1;ZH16_S2;	137	0.903726	118.118	arahy.Tifrunner.gnm2.Arahy.04	11866712	11887600	Ubiquitin-proteasome pathway	--	ubiquitin protein ligase 6		arahy.NSV5VW	0.714966	1.19426	0.41014	0.382901	0.066587	0.0588737	0.0819672	0.0149225	AT3G17205	67.457	0	1476	UPL6	ubiquitin protein ligase 6	ubiquitin protein ligase 6
arahy.BWT45P	2.82949	0.00216969	magenta	ZH16_S1;ZH16_S2;	137	0.887241	111.62	arahy.Tifrunner.gnm2.Arahy.04	123951340	123955326	Ubiquitin-proteasome pathway	--	membrane-anchored ubiquitin-fold protein 2	Wang et al., 2018	arahy.BWT45P	3.57584	3.20032	2.89298	2.62922	0.483059	0.109197	0.192124	0	AT3G01050	61.062	2.24e-47	150	MUB1	T4P13.27|T4P13_27|membrane-anchored ubiquitin-fold protein 1 precursor	membrane-anchored ubiquitin-fold protein 1 precursor
arahy.TZF9D3	3.41452	3.27389e-12	magenta	ZH16_S1;ZH16_S2;	137	0.863979	129.389	arahy.Tifrunner.gnm2.Arahy.04	124989366	124993573	Ubiquitin-proteasome pathway	--	RING finger protein 38-like		arahy.TZF9D3	6.3805	7.78086	7.22327	4.98832	0.5573	0.327045	0	0.074699	AT5G38895	54.425	8.63e-90	264	AT5G38895	-	RING/U-box superfamily protein
arahy.VU3YHT	5.69239	0.0252296	magenta	ZH16_S1;ZH16_S2;	137	0.928591	156.115	arahy.Tifrunner.gnm2.Arahy.14	90143027	90146503	Ubiquitin-proteasome pathway	--	RING/FYVE/PHD zinc finger superfamily protein		arahy.VU3YHT	0.483147	0.780087	0.243256	0.231762	0.0513119	0	0	0	AT5G05830	54.857	2.51e-58	184	AT5G05830	MJJ3.25|MJJ3_25	RING/FYVE/PHD zinc finger superfamily protein
arahy.KJE0V2	3.9045	0.00334159	magenta	ZH16_S1;ZH16_S2;	137	0.913718	104.608	arahy.Tifrunner.gnm2.Arahy.04	124676336	124678495	Ubiquitin-proteasome pathway	--	F-box and associated interaction domains-containing protein		arahy.KJE0V2	1.38774	1.58502	0.307123	0	0.0759977	0.0483243	0	0	AT4G12560	29.26	8.07e-21	94.4	CPR1	CONSTITUTIVE EXPRESSER OF PR GENES 1|CONSTITUTIVE EXPRESSER OF PR GENES 30|CPR30|T1P17.150|T1P17_150	F-box and associated interaction domains-containing protein
arahy.CT2P3Y	4.05857	2.88627e-17	magenta	ZH16_S1;ZH16_S2;	137	0.957057	122.13	arahy.Tifrunner.gnm2.Arahy.04	124001793	124002548	Ubiquitin-proteasome pathway	--	F-box-like protein		arahy.CT2P3Y	15.9366	12.0083	8.61345	6.44044	0.816959	0.196174	0.287959	0	AT5G39250	66.535	4.79e-122	348	AT5G39250	K3K3.16|K3K3_16	F-box family protein
arahy.L6QVD1	4.55063	0.00826418	magenta	ZH16_S1;ZH16_S2;	137	0.848316	109.254	arahy.Tifrunner.gnm2.Arahy.15	62758783	62761352	Fatty acid synthesis	--	Fatty acid hydroxylase superfamily		arahy.L6QVD1	17.3269	7.9062	6.18832	5.1085	2.64736	0.332475	0.155797	0.0386801	AT1G14290	76.448	6.88e-153	426	SBH2	AtSBH2|F14L17.5|F14L17_5|sphingoid base hydroxylase 2	sphingoid base hydroxylase 2
arahy.4DFA8P	4.20222	7.75092e-10	magenta	ZH16_S1;ZH16_S2;	137	0.959843	182.592	arahy.Tifrunner.gnm2.Arahy.10	30517918	30520358	Fatty acid synthesis	--	Plastid-lipid associated protein PAP / fibrillin family protein	Wang et al., 2018	arahy.4DFA8P	25.7692	39.8937	17.6525	15.4893	1.32351	0.823453	0.476118	0.0722373	AT5G09820	49.239	1.06e-56	182	AT5G09820	MYH9.3|MYH9_3	Plastid-lipid associated protein PAP / fibrillin family protein
arahy.0K456L	2.16474	8.2472e-07	magenta	ZH16_S1;ZH16_S2;	137	0.897229	128.78	arahy.Tifrunner.gnm2.Arahy.05	9582332	9584207	Cytochrome P450 protein	--	Cytochrome P450 superfamily protein		arahy.0K456L	8.6087	15.2959	2.91369	2.09689	1.8756	0.107256	0.940819	1.26395	AT3G26300	43.008	1.48e-124	372	CYP71B34	''cytochrome P450|cytochrome P450|family 71|polypeptide 34|polypeptide 34''|subfamily B	cytochrome P450, family 71, subfamily B, polypeptide 34
arahy.2F8F1S	5.09874	1.10305e-20	magenta	ZH16_S1;ZH16_S2;	137	0.885703	132.719	arahy.Tifrunner.gnm2.Arahy.04	124870068	124876885	Cytochrome P450 protein	--	Cytochrome P450 superfamily protein		arahy.2F8F1S	10.4828	19.347	1.66673	1.61702	0.274157	0.277606	0.0766927	0	AT3G30180	70.664	0	708	BR6OX2	CYP85A2|brassinosteroid-6-oxidase 2	brassinosteroid-6-oxidase 2
arahy.9YX67Z	3.178	0.000900848	magenta	ZH16_S1;ZH16_S2;	137	0.934481	118.063	arahy.Tifrunner.gnm2.Arahy.04	125933796	125935754	Disease resistance protein	--	disease resistance protein (CC-NBS-LRR class) family protein		arahy.9YX67Z	10.8058	13.0588	2.09314	2.0063	1.24404	0.21582	0.0508657	0	AT4G27220	28.744	4.21e-48	182	AT4G27220	M4I22.30|M4I22_30	NB-ARC domain-containing disease resistance protein
arahy.SK6LYR	3.5596	0.000634487	magenta	ZH16_S1;ZH16_S2;	137	0.941215	110.614	arahy.Tifrunner.gnm2.Arahy.04	125919867	125922353	Disease resistance protein	--	Disease resistance protein (TIR-NBS-LRR class)		arahy.SK6LYR	1.4909	1.08645	0.669406	0.580257	0.106668	0.0302177	0.0131306	0	AT4G27220	28.607	4.15e-70	249	AT4G27220	M4I22.30|M4I22_30	NB-ARC domain-containing disease resistance protein
arahy.691YBH	2.56692	0.0360208	magenta	ZH16_S1;ZH16_S2;	137	0.864179	155.97	arahy.Tifrunner.gnm2.Arahy.19	72065757	72066750	Disease resistance protein	--	Disease resistance protein (TIR-NBS-LRR class) family	Wang et al., 2019	arahy.691YBH	1.89746	3.98793	0.86463	1.36165	0.3304	0.427382	0.0471904	0	AT4G14370	55.556	8.79e-15	68.2	AT4G14370	DL3225C|FCAALL.185	Disease resistance protein (TIR-NBS-LRR class) family
arahy.FHX76J	3.88206	0.0230133	magenta	ZH16_S1;ZH16_S2;	137	0.889126	77.044	arahy.Tifrunner.gnm2.Arahy.02	88251340	88262416	Disease resistance protein	--	Disease resistance protein (TIR-NBS-LRR class) family		arahy.FHX76J	0.570165	0.645822	0.281475	0.186836	0.158093	0.0417906	0.0140171	0	AT5G36930	43.823	9.51e-173	556	AT5G36930	MLF18.50|MLF18_50	Disease resistance protein (TIR-NBS-LRR class) family
arahy.Y2HGKC	2.42813	0.0252481	magenta	ZH16_S1;ZH16_S2;	137	0.859428	87.6191	arahy.Tifrunner.gnm2.Arahy.13	129443788	129454798	Disease resistance protein	--	LRR and NB-ARC domain disease resistance protein		arahy.Y2HGKC	1.56713	1.08532	0.99961	0.895175	0.281107	0.0104278	0.0294667	0.0402378	AT3G14470	34.412	2.4e-177	544	AT3G14470	-	NB-ARC domain-containing disease resistance protein

## Sheet: yellow-hub-heatmap
Geneid	log2FoldChange	padj	Module	module-related-trait	gene_sum	kME	kWithin	Chr	start_pos	end_pos	Type	TF	Function	Reference	geneID	ZH16_S1	ZH16_S2	ZH16_S3	ZH16_S4	ZH6_S1	ZH6_S2	ZH6_S3	ZH6_S4	AT_id	identity	Evalue	alignde_aa_length	Symbol	Synonyms	description
arahy.1LT7X4	5.08114	1.76122e-06	yellow	ZH16_S2;	504	0.943689	193.173	arahy.Tifrunner.gnm2.Arahy.15	93984358	93984901	Transcript factor	AP2/EREBP	AP2-like ethylene-responsive transcription factor ANT-like isoform X5		arahy.1LT7X4	1.65597	16.4688	5.86356	9.0602	0.324148	0.562015	0.0877843	0.159815	AT4G37750	40	5.38e-07	47.4	ANT	AINTEGUMENTA|AtANT|CKC|CKC1|COMPLEMENTING A PROTEIN KINASE C MUTANT 1|DRAGON|DRG|T28I19.30|T28I19_30	Integrase-type DNA-binding superfamily protein
arahy.RY1LQQ	5.3012	4.9577e-05	yellow	ZH16_S2;	504	0.973632	236.656	arahy.Tifrunner.gnm2.Arahy.14	112222403	112223376	Transcript factor	ARF	auxin response factor 4		arahy.RY1LQQ	0.707966	7.16458	2.40599	2.4745	0.0846197	0.152068	0	0	AT5G60450	53.846	8.31e-42	148	ARF4	MUF9.7|MUF9_7|auxin response factor 4	auxin response factor 4
arahy.QD1ITD	3.59035	0.0149573	yellow	ZH16_S2;	504	0.947103	214.263	arahy.Tifrunner.gnm2.Arahy.07	9956959	9959032	Transcript factor	B3	B3 DNA-binding domain protein		arahy.QD1ITD	1.96925	8.45328	1.59329	3.30236	0.248669	0.645164	0.58663	0	AT3G18990	40	2.18e-09	55.5	VRN1	REDUCED VERNALIZATION RESPONSE 1|REM39|REPRODUCTIVE MERISTEM 39	AP2/B3-like transcriptional factor family protein
arahy.48I8DT	3.31142	0.0411418	yellow	ZH16_S2;	504	0.809483	156.885	arahy.Tifrunner.gnm2.Arahy.19	146177684	146182895	Transcript factor	bHLH	basic helix-loop-helix (bHLH) DNA-binding superfamily protein	Wang et al., 2019	arahy.48I8DT	0.366179	2.96449	1.88157	0.32778	0.176034	0.846771	0.192952	0.1131	AT3G26744	81.481	9.31e-54	174	ICE1	A. THALIANA INDUCER OF CBP EXPRESSION 1|ATICE1|INDUCER OF CBF EXPRESSION 1|SCREAM|SCRM	basic helix-loop-helix (bHLH) DNA-binding superfamily protein
arahy.7XD9C1	3.27414	5.25733e-18	yellow	ZH16_S2;	504	0.866139	229.82	arahy.Tifrunner.gnm2.Arahy.02	512092	516778	Transcript factor	bHLH	bHLH transcription factor		arahy.7XD9C1	2.03529	16.5116	2.40186	2.38941	1.38333	1.66023	3.18722	2.34619	AT1G63650	39.177	1.13e-126	387	EGL3	ATMYC-2|AtEGL3|EGL1|ENHANCER OF GLABRA 3|F24D7.16|F24D7_16	basic helix-loop-helix (bHLH) DNA-binding superfamily protein
arahy.Z9H0PS	3.63031	9.48987e-05	yellow	ZH16_S2;	504	0.911686	206.253	arahy.Tifrunner.gnm2.Arahy.20	6174590	6178922	Transcript factor	FAR1	protein FAR1-RELATED SEQUENCE 7-like isoform X2	Zhou et al., 2021; Zhang et al., 2019	arahy.Z9H0PS	8.18131	17.7371	9.80918	10.0144	0.647902	0.393266	0.147193	0	AT4G38180	31.095	1.72e-96	317	FRS5	F20D10.300|F20D10_300|FAR1-related sequence 5	FAR1-related sequence 5
arahy.3DLK77	2.37644	0.0376489	yellow	ZH16_S2;	504	0.922368	211.489	arahy.Tifrunner.gnm2.Arahy.04	125246934	125252522	Transcript factor	FHA	SMAD/FHA domain-containing protein		arahy.3DLK77	3.14183	7.44221	3.36419	3.08733	0.623929	0.458295	0.0782239	0.0389734	AT5G38840	50.442	0	632	AT5G38840	K15E6.5|K15E6_5	SMAD/FHA domain-containing protein
arahy.4ER605	2.74189	0.0105896	yellow	ZH16_S2;	504	0.802434	133.607	arahy.Tifrunner.gnm2.Arahy.01	45162	49731	Transcript factor	G2-like	myb-like protein X-like		arahy.4ER605	1.69023	2.71966	1.01059	2.15459	0.22031	0.0783115	0.145834	0	AT1G24090	52.055	1.01e-14	75.9	AT1G24090	T23E23.25	RNase H family protein
arahy.L7SRZY	2.34359	0.000646212	yellow	ZH16_S2;	504	0.928158	228.058	arahy.Tifrunner.gnm2.Arahy.03	100361929	100367642	Transcript factor	MADS-box	MADS-box transcription factor 6		arahy.L7SRZY	4.87861	26.8948	8.30467	8.93508	1.66526	5.1212	5.43585	7.68571	AT2G45650	37.838	3.02e-12	65.5	AGL6	AGAMOUS-like 6|F17K2.18|REDUCED SHOOT BRANCHING 1|RSB1	AGAMOUS-like 6
arahy.S6RW25	3.88214	0.0281537	yellow	ZH16_S2;	504	0.801683	362.073	arahy.Tifrunner.gnm2.Arahy.17	131301550	131309452	Transcript factor	MADS-box	MADS-box transcription factor 6		arahy.S6RW25	1.50292	10.0488	2.78447	2.04085	0.536216	4.76078	1.07568	0.170138	AT3G57230	57.047	8.97e-51	167	AGL16	AGAMOUS-like 16	AGAMOUS-like 16
arahy.17JY83	3.6049	7.33404e-08	yellow	ZH16_S2;	504	0.952948	226.95	arahy.Tifrunner.gnm2.Arahy.01	35963617	35967445	Transcript factor	MYB	putative Myb family transcription factor At1g14600-like isoform X2		arahy.17JY83	0.104647	5.85693	1.32888	2.29704	0.185043	0.448409	0.914077	0	AT2G38300	66.234	3.41e-26	104	AT2G38300	F16M14.25	myb-like HTH transcriptional regulator family protein
arahy.AV6HSI	5.99142	8.66039e-06	yellow	ZH16_S2;	504	0.947293	215.086	arahy.Tifrunner.gnm2.Arahy.01	109532029	109535909	Transcript factor	SBP	squamosa promoter-binding-like protein 6-like		arahy.AV6HSI	1.12784	3.46347	1.07381	1.66578	0.207136	0.0456971	0.0712263	0	AT1G69170	53.012	3.71e-47	169	AT1G69170	AtSPL6|F4N2.13|F4N2_13|SPL6|SQUAMOSA PROMOTER BINDING PROTEIN (SBP)-domain transcription factor 6	Squamosa promoter-binding protein-like (SBP domain) transcription factor family protein
arahy.5RG0UU	2.03766	3.06939e-08	yellow	ZH16_S2;	504	0.937322	255.738	arahy.Tifrunner.gnm2.Arahy.14	114967269	114974377	Transcript factor	SNF2	putative chromatin-remodeling complex ATPase chain-like isoform 1		arahy.5RG0UU	12.1358	37.9931	13.3937	17.6542	2.89291	14.109	9.52701	6.22954	AT5G13830	52.83	7.66e-21	91.3	AT5G13830	MAC12.22|MAC12_22	FtsJ-like methyltransferase family protein
arahy.9JBJ7A	4.6035	0.000963414	yellow	ZH16_S2;	504	0.904282	162.258	arahy.Tifrunner.gnm2.Arahy.12	113354364	113357109	Transcript factor	SNF2	chromatin remodeling 31		arahy.9JBJ7A	0.812459	10.1691	7.18651	4.83648	0.0231668	0	0	0	AT1G05490	43.366	1.69e-65	236	chr31	T25N20.14|chromatin remodeling 31	chromatin remodeling 31
arahy.MGXB0Y	2.04845	0.003318	yellow	ZH16_S2;	504	0.934105	199.7	arahy.Tifrunner.gnm2.Arahy.01	108415733	108424187	Transcript factor	TF	general transcription factor IIE subunit 1-like isoform X1	Zhang et al., 2017	arahy.MGXB0Y	2.03284	12.3691	6.94374	5.8244	1.32656	2.89853	2.33145	1.61871	AT1G03280	56.289	4.47e-175	501	AT1G03280	F15K9.12|F15K9_12	Transcription factor TFIIE, alpha subunit
arahy.M32WB3	5.55554	0.00253315	yellow	ZH16_S2;	504	0.928556	206.823	arahy.Tifrunner.gnm2.Arahy.02	96925681	96929095	Phytohormone	--	gibberellin 20 oxidase 2-like	Zhang et al., 2019	arahy.M32WB3	0	2.34716	0.85545	0.477194	0	0.0424731	0	0	AT5G51810	61.756	2.5e-159	452	GA20OX2	AT2353|ATGA20OX2|MIO24.5|MIO24_5|gibberellin 20 oxidase 2	gibberellin 20 oxidase 2
arahy.DM7MDF	5.89219	7.83845e-10	yellow	ZH16_S2;	504	0.975699	243.953	arahy.Tifrunner.gnm2.Arahy.14	12874059	12876206	Phytohormone	--	histidine kinase 1		arahy.DM7MDF	4.21685	33.7928	5.61182	12.9729	0.914768	0.552452	0.137621	0	AT2G17820	85.294	9.12e-49	175	HK1	AHK1|ATHK1|T13L16.16|T13L16_16|histidine kinase 1	histidine kinase 1
arahy.Q4NL7Y	1.64807	0.00925455	yellow	ZH16_S2;	504	0.935424	195.017	arahy.Tifrunner.gnm2.Arahy.19	23193336	23196450	Phytohormone	--	histidine kinase 1		arahy.Q4NL7Y	2.1308	8.34992	3.87729	6.12815	0.627593	1.43188	0.57638	0.402525	AT2G17820	85.577	1.17e-50	181	HK1	AHK1|ATHK1|T13L16.16|T13L16_16|histidine kinase 1	histidine kinase 1
arahy.J1Z9L2	2.95054	2.27513e-06	yellow	ZH16_S2;	504	0.925829	296.711	arahy.Tifrunner.gnm2.Arahy.13	23191913	23200020	Phytohormone	--	tyrosine aminotransferase 3		arahy.J1Z9L2	0.356305	30.0913	4.30317	5.76571	0.370435	3.78328	0.478143	0.0560532	AT5G53970	56.65	2.19e-178	504	TAT7	K19P17.14|K19P17_14|tyrosine aminotransferase 7	Tyrosine transaminase family protein
arahy.F9LVIV	7.04096	4.02603e-06	yellow	ZH16_S2;	504	0.944876	199.709	arahy.Tifrunner.gnm2.scaffold_50	43645	45919	Ubiquitin-proteasome pathway	--	F-box and associated interaction domains-containing protein		arahy.F9LVIV	0.900643	4.22257	1.49273	2.37589	0.271714	0.024036	0.195283	0	AT4G12560	26.936	5.37e-17	82	CPR1	CONSTITUTIVE EXPRESSER OF PR GENES 1|CONSTITUTIVE EXPRESSER OF PR GENES 30|CPR30|T1P17.150|T1P17_150	F-box and associated interaction domains-containing protein
arahy.F717DE	6.05707	0.00582921	yellow	ZH16_S2;	504	0.873069	130.823	arahy.Tifrunner.gnm2.Arahy.01	99251780	99251998	Ubiquitin-proteasome pathway	--	F-box protein At1g10780-like		arahy.F717DE	1.10405	6.46487	3.60282	3.79878	0.110121	0	0.397599	0	AT1G10780	75.714	2.4e-31	112	AT1G10780	T16B5.8	F-box/RNI-like superfamily protein
arahy.49KH4I	6.3475	9.39997e-06	yellow	ZH16_S2;	504	0.938675	192.645	arahy.Tifrunner.gnm2.Arahy.04	125835996	125837951	Ubiquitin-proteasome pathway	--	F-box protein interaction domain protein		arahy.49KH4I	1.12192	6.57618	3.15739	2.65911	0.330098	0.065149	0	0	AT4G12560	32.248	7.73e-33	128	CPR1	CONSTITUTIVE EXPRESSER OF PR GENES 1|CONSTITUTIVE EXPRESSER OF PR GENES 30|CPR30|T1P17.150|T1P17_150	F-box and associated interaction domains-containing protein
arahy.APGH35	1.1175	0.0314656	yellow	ZH16_S2;	504	0.809378	139.906	arahy.Tifrunner.gnm2.Arahy.01	95524294	95527700	Ubiquitin-proteasome pathway	--	zinc finger (C3HC4-type RING finger) family protein		arahy.APGH35	2.84543	5.56889	3.48437	2.79284	1.28953	3.34708	2.18813	2.20849	AT2G26000	68.657	4.32e-22	92.8	BRIZ2	BRAP2 RING ZnF UBP domain-containing protein 2|T19L18.19|T19L18_19	zinc finger (C3HC4-type RING finger) family protein
arahy.B47L6X	1.55436	3.95065e-07	yellow	ZH16_S2;	504	0.85677	160.726	arahy.Tifrunner.gnm2.Arahy.13	3251083	3255471	Ubiquitin-proteasome pathway	--	Zinc finger (C3HC4-type RING finger) family protein		arahy.B47L6X	5.43167	22.4261	14.266	7.31552	4.46688	7.46064	3.4625	2.472	AT5G60710	56.753	0	758	AT5G60710	MUP24.2|MUP24_2	Zinc finger (C3HC4-type RING finger) family protein
arahy.IGMF9F	1.04452	0.00118764	yellow	ZH16_S2;	504	0.969625	235.62	arahy.Tifrunner.gnm2.Arahy.09	11275306	11283075	Ubiquitin-proteasome pathway	--	zinc finger CCCH domain-containing protein 65-like		arahy.IGMF9F	11.6568	47.211	21.9416	28.5445	5.7108	14.4873	8.8531	7.11546	AT5G56930	31.618	7.26e-50	189	EMB1789	MHM17.4|MHM17_4|embryo defective 1789	CCCH-type zinc finger family protein
arahy.FC6ISK	1.54774	0.0263615	yellow	ZH16_S2;	504	0.832821	177.462	arahy.Tifrunner.gnm2.Arahy.06	13522503	13525693	Ubiquitin-proteasome pathway	--	zinc finger protein 8		arahy.FC6ISK	0.334259	4.58813	2.9278	2.48652	0.222266	1.4696	1.92906	1.06975	AT2G41940	41.489	3.86e-44	153	ZFP8	T6D20.16|T6D20_16|ZINC FINGER PROTEIN8|zinc finger protein 8	zinc finger protein 8
arahy.133ZSG	2.24213	0.0255794	yellow	ZH16_S2;	504	0.800436	106.227	arahy.Tifrunner.gnm2.Arahy.13	8785630	8787203	Fatty acid synthesis	--	3-ketoacyl-CoA synthase 4		arahy.133ZSG	0.902894	2.46581	2.2631	1.84209	0.475592	0.498141	0.242568	0.376713	AT1G19440	72.509	1.65e-143	416	KCS4	3-ketoacyl-CoA synthase 4|F18O14.21|F18O14_21	3-ketoacyl-CoA synthase 4
arahy.AF6NZ2	3.61839	7.70165e-05	yellow	ZH16_S2;	504	0.895656	145.336	arahy.Tifrunner.gnm2.Arahy.01	394120	397789	Fatty acid synthesis	--	1-phosphatidylinositol-3-phosphate 5-kinase FAB1B-like isoform X3		arahy.AF6NZ2	0.465786	3.93932	1.56479	2.52769	0.281463	0.287263	0.315934	0.273172	AT3G14270	60	3.03e-06	47.8	FAB1B	FORMS APLOID AND BINUCLEATE CELLS 1B	phosphatidylinositol-4-phosphate 5-kinase family protein
arahy.SRT95Q	4.5397	0.00956334	yellow	ZH16_S2;	504	0.965227	225.96	arahy.Tifrunner.gnm2.Arahy.06	68771239	68771581	Fatty acid synthesis	--	4-coumarate:CoA ligase 3		arahy.SRT95Q	3.85545	16.6152	5.1243	7.83358	0.0992453	1.90498	1.61263	0.978622	AT1G65060	64	4.58e-26	99.8	4CL3	4-COUMARATE:COA LIGASE|4-coumarate:CoA ligase 3|F16G16.6|F16G16_6	4-coumarate:CoA ligase 3
arahy.LR7J2X	2.05807	0.0380546	yellow	ZH16_S2;	504	0.918322	182.317	arahy.Tifrunner.gnm2.Arahy.18	119588483	119592320	Fatty acid synthesis	--	acyl-CoA binding protein 4		arahy.LR7J2X	1.93897	10.2364	3.63517	7.82236	0.375918	0	0	0	AT3G05420	37.795	2.08e-16	76.6	ACBP4	AtACBP4|F22F7.13|F22F7_13|acyl-CoA binding protein 4	acyl-CoA binding protein 4
arahy.89SBZN	3.16895	3.60409e-05	yellow	ZH16_S2;	504	0.894964	205.518	arahy.Tifrunner.gnm2.Arahy.14	21985288	21991393	Fatty acid synthesis	--	choline-phosphate cytidylyltransferase		arahy.89SBZN	7.70952	14.8386	9.61069	7.78645	0.815735	0.330329	0.0783111	0	AT2G32260	79.231	6.59e-152	428	CCT1	ATCCT1|T32F6.22|T32F6_22|phosphorylcholine cytidylyltransferase	phosphorylcholine cytidylyltransferase
arahy.93DW2D	4.43218	5.61563e-07	yellow	ZH16_S2;	504	0.957779	220.803	arahy.Tifrunner.gnm2.Arahy.11	33430489	33434437	Fatty acid synthesis	--	fatty acid desaturase 6		arahy.93DW2D	0.865752	5.10414	2.65671	1.69069	0.151269	0.189902	0.0780234	0.097189	AT4G30950	51.235	3.36e-46	164	FAD6	CHLOROPLAST PRECURSOR|F6I18.140|F6I18_140|FADC|FATTY ACID DESATURASE C|OMEGA-6 FATTY ACID DESATURASE|SFD4|STEAROYL DESATURASE DEFICIENCY 4|fatty acid desaturase 6	fatty acid desaturase 6
arahy.F0YWKB	1.96985	1.61113e-08	yellow	ZH16_S2;	504	0.987684	254.63	arahy.Tifrunner.gnm2.Arahy.04	14740801	14745109	Fatty acid synthesis	--	long chain acyl-CoA synthetase 2-like		arahy.F0YWKB	13.562	45.3882	17.0312	20.981	3.46084	4.49155	3.25317	3.65772	AT1G49430	70.588	1.29e-15	80.1	LACS2	F13F21.14|F13F21_14|LATERAL ROOT DEVELOPMENT 2|LRD2|long-chain acyl-CoA synthetase 2	long-chain acyl-CoA synthetase 2
arahy.4R2B5R	3.44629	0.0408094	yellow	ZH16_S2;	504	0.868903	129.836	arahy.Tifrunner.gnm2.Arahy.04	122811885	122818566	Fatty acid synthesis	--	O-acyltransferase (WSD1-like) family protein		arahy.4R2B5R	0.15587	1.20713	0.157877	0.4972	0.271405	0.106615	0	0	AT5G53390	26.296	2.34e-46	169	FOP1	FOLDED PETAL 1|K19E1.19|K19E1_19|NTHASE/DIACYLGLYCEROL ACYLTRANSFERASE 11|WSD11	O-acyltransferase (WSD1-like) family protein
arahy.LN40BG	2.54173	0.015638	yellow	ZH16_S2;	504	0.869793	186.123	arahy.Tifrunner.gnm2.Arahy.15	58242398	58247834	Starch and sucrose metabolism	--	beta glucosidase 16		arahy.LN40BG	2.80831	4.93738	2.43809	1.98928	0.486773	0.280571	0.119485	0.0594597	AT3G06510	66.396	0	848	SFR2	ATSFR2|F5E6.16|F5E6_16|SENSITIVE TO FREEZING 2	Glycosyl hydrolase superfamily protein
arahy.3Q5F2Z	4.95722	0.000486172	yellow	ZH16_S2;	504	0.884901	154.383	arahy.Tifrunner.gnm2.Arahy.15	93990102	93992698	Starch and sucrose metabolism	--	beta glucosidase 27		arahy.3Q5F2Z	0.89872	3.00482	1.69274	2.08303	0.113011	0.081236	0.0306052	0	AT1G11190	70.642	3.16e-52	174	BFN1	ENDO1|ENDONUCLEASE 1|T28P6.14|T28P6_14|bifunctional nuclease i	bifunctional nuclease i
arahy.V367V9	1.37915	0.033039	yellow	ZH16_S2;	504	0.84551	297.307	arahy.Tifrunner.gnm2.Arahy.06	78719882	78723784	Starch and sucrose metabolism	--	beta-galactosidase 8	Wang et al., 2018	arahy.V367V9	6.75882	54.8871	12.7751	17.9897	3.2957	20.453	14.31	9.5273	AT2G28470	49.398	7.29e-46	162	BGAL8	T17D12.3|T17D12_3|beta-galactosidase 8	beta-galactosidase 8
arahy.K5ZE2Z	4.31435	0.0467654	yellow	ZH16_S2;	504	0.855154	207.729	arahy.Tifrunner.gnm2.Arahy.13	8032963	8033834	Starch and sucrose metabolism	--	fructose-bisphosphate aldolase 1		arahy.K5ZE2Z	0.393145	7.29057	1.57242	0.0783431	0.392939	0.363927	0	0	AT2G21330	78.065	5.54e-76	229	FBA1	AtFBA1|F3K23.9|F3K23_9|fructose-bisphosphate aldolase 1	fructose-bisphosphate aldolase 1
arahy.REUM3H	2.19391	0.018439	yellow	ZH16_S2;	504	0.863982	161.488	arahy.Tifrunner.gnm2.Arahy.02	66468293	66473452	Starch and sucrose metabolism	--	glucose-6-phosphate isomerase		arahy.REUM3H	5.00293	18.4046	11.8437	16.757	1.05224	0.414409	0.414147	0	AT5G42740	64.286	9.17e-06	44.3	AT5G42740	MJB21.12|MJB21_12	Sugar isomerase (SIS) family protein
arahy.9B6JUI	5.31428	0.00336665	yellow	ZH16_S2;	504	0.885303	224.111	arahy.Tifrunner.gnm2.Arahy.04	125750609	125752693	Starch and sucrose metabolism	--	glycoside hydrolase family 81 protein		arahy.9B6JUI	0.128766	2.21037	0.517935	0.0613154	0.115667	0.0616727	0	0	AT5G15870	49.785	0	632	AT5G15870	F1N13.10|F1N13_10	glycosyl hydrolase family 81 protein
arahy.MEJ08X	3.97914	0.0300216	yellow	ZH16_S2;	504	0.912463	174.874	arahy.Tifrunner.gnm2.Arahy.04	125741898	125746181	Starch and sucrose metabolism	--	glycoside hydrolase family 81 protein		arahy.MEJ08X	0.299082	1.04354	0.543116	0.360533	0.0139685	0.0701744	0.0189144	0	AT5G15870	51.336	0	670	AT5G15870	F1N13.10|F1N13_10	glycosyl hydrolase family 81 protein
arahy.NV11DU	3.16459	0.0330919	yellow	ZH16_S2;	504	0.907901	178.843	arahy.Tifrunner.gnm2.Arahy.04	125731233	125733127	Starch and sucrose metabolism	--	glycoside hydrolase family 81 protein		arahy.NV11DU	0.764185	2.43072	1.21118	0.693716	0.065092	0.0958909	0	0	AT5G15870	56.957	3.03e-170	498	AT5G15870	F1N13.10|F1N13_10	glycosyl hydrolase family 81 protein
arahy.X6L2LG	3.31481	0.000581917	yellow	ZH16_S2;	504	0.928712	279.79	arahy.Tifrunner.gnm2.Arahy.05	83084473	83088302	Starch and sucrose metabolism	--	Glycosyl hydrolase family 47 protein		arahy.X6L2LG	0.1888	12.8244	1.45086	2.51735	0.142491	1.22439	0.192944	0	AT5G43710	82.54	1.17e-26	106	AT5G43710	MNS4|MQD19.4|MQD19_4|mannosidase 4	Glycosyl hydrolase family 47 protein
arahy.2QVW8D	3.68072	1.49116e-07	yellow	ZH16_S2;	504	0.859925	133.742	arahy.Tifrunner.gnm2.Arahy.13	23551353	23554083	Starch and sucrose metabolism	--	sucrose transporter 2		arahy.2QVW8D	3.49252	26.9629	6.76212	24.6817	0.216016	2.1652	0.20893	0.152147	AT2G02860	84.211	5.46e-13	67	SUT2	ARABIDOPSIS THALIANA SUCROSE TRANSPORTER 3|ATSUC3|ATSUT2|SUC3|SUCROSE TRANSPORTER 3|T17M13.3|T17M13_3|sucrose transporter 2	sucrose transporter 2
arahy.S5WRJR	9.4905	5.87325e-09	yellow	ZH16_S2;	504	0.964438	220.865	arahy.Tifrunner.gnm2.Arahy.12	23668190	23668745	ABC transporter	--	ABC transporter family protein		arahy.S5WRJR	13.6588	74.7742	28.2376	44.9252	2.90125	0.0772286	0.245532	0	AT4G39850	78.947	3.49e-72	234	ABCD1	ACN2|ATP-binding cassette D1|Arabidopsis thaliana ATP-binding cassette D1|AtABCD1|COMATOSE|CTS|PED3|PEROXISOME DEFECTIVE 3|PXA1|T5J17.20|T5J17_20|acetate non-utilizing 2|peroxisomal ABC transporter 1	peroxisomal ABC transporter 1
arahy.VYP3BN	2.78008	0.00564191	yellow	ZH16_S2;	504	0.9456	199.755	arahy.Tifrunner.gnm2.Arahy.14	97878655	97893795	ABC transporter	--	ABC transporter G family member 11-like isoform X1		arahy.VYP3BN	1.83886	8.25619	1.72081	4.87688	0.21437	0.185839	0	0	AT1G44910	59.677	1.36e-17	85.1	PRP40A	ATPRP40A|F27F5.2|pre-mRNA-processing protein 40A	pre-mRNA-processing protein 40A
arahy.TZU5V7	2.33264	3.86241e-06	yellow	ZH16_S2;	504	0.936026	238.531	arahy.Tifrunner.gnm2.Arahy.01	106192764	106202210	ABC transporter	--	ATP-binding ABC transporter		arahy.TZU5V7	1.0855	3.90221	1.57588	0.970145	0.56366	0.759555	0.604702	0.269835	AT3G53480	61.359	0	1897	ABCG37	ATP-binding cassette G37|ATPDR9|PDR9|PIS1|PLEIOTROPIC DRUG RESISTANCE 9|pleiotropic drug resistance 9|polar auxin transport inhibitor sensitive 1	pleiotropic drug resistance 9
arahy.BBI6IF	1.85662	0.0103333	yellow	ZH16_S2;	504	0.967924	242.771	arahy.Tifrunner.gnm2.Arahy.02	88323779	88337788	Disease resistance protein	--	Disease resistance protein (TIR-NBS-LRR class) family		arahy.BBI6IF	1.58693	6.21538	2.11792	2.29326	0.440377	0.714526	0.176419	0.142582	AT5G36930	43.293	5.1e-179	576	AT5G36930	MLF18.50|MLF18_50	Disease resistance protein (TIR-NBS-LRR class) family
arahy.HFSF7Z	5.42736	0.00219604	yellow	ZH16_S2;	504	0.945475	195.379	arahy.Tifrunner.gnm2.Arahy.15	153852037	153856548	Disease resistance protein	--	Disease resistance protein (TIR-NBS-LRR class) family		arahy.HFSF7Z	0.0135724	1.57374	0.492272	0.700623	0.120852	0.0458609	0	0	AT5G36930	40.16	1.11e-142	456	AT5G36930	MLF18.50|MLF18_50	Disease resistance protein (TIR-NBS-LRR class) family
arahy.RL0N5R	1.32659	0.0155676	yellow	ZH16_S2;	504	0.881248	327.028	arahy.Tifrunner.gnm2.Arahy.02	99527345	99533027	Disease resistance protein	--	Disease resistance protein (TIR-NBS-LRR class) family	Zhang et al., 2019	arahy.RL0N5R	0.68843	4.09022	1.48813	1.2083	0.520377	1.57129	0.849833	0.614049	AT3G14470	37.901	0	643	AT3G14470	-	NB-ARC domain-containing disease resistance protein
arahy.88X2TA	5.07989	0.000210269	yellow	ZH16_S2;	504	0.938041	255.869	arahy.Tifrunner.gnm2.Arahy.15	153919758	153937375	Disease resistance protein	--	disease resistance protein (TIR-NBS-LRR class), putative		arahy.88X2TA	0.0585254	1.76651	0.297461	0.294386	0.0617978	0.0440246	0.0139465	0.0485513	AT5G17680	34.083	1.53e-135	442	AT5G17680	MVA3.30|MVA3_30	disease resistance protein (TIR-NBS-LRR class)
arahy.3AG3I6	2.29675	0.0387291	yellow	ZH16_S2;	504	0.971492	234.065	arahy.Tifrunner.gnm2.Arahy.04	123655356	123662554	PPR	--	Pentatricopeptide repeat (PPR) superfamily protein		arahy.3AG3I6	2.18302	9.58511	4.43326	5.03491	0.454902	0.191172	0.052095	0.0334748	AT5G16210	68.675	6.68e-33	123	AT5G16210	T21H19.130|T21H19_130	HEAT repeat-containing protein
arahy.3F914A	2.30594	0.0282435	yellow	ZH16_S2;	504	0.870471	168.681	arahy.Tifrunner.gnm2.Arahy.15	154866485	154868284	PPR	--	Pentatricopeptide repeat (PPR) superfamily protein		arahy.3F914A	0.764065	2.11903	1.7058	1.33359	0.120583	0.0449528	0.0181421	0.0330285	AT1G12700	41.308	1.66e-159	470	RPF1	RNA processing factor 1|T12C24.31|T12C24_31	RNA processing FACTOR
arahy.4J8AWY	1.57407	0.0133504	yellow	ZH16_S2;	504	0.917586	190.791	arahy.Tifrunner.gnm2.Arahy.15	154763971	154771536	PPR	--	Pentatricopeptide repeat (PPR) superfamily protein		arahy.4J8AWY	1.43544	4.18997	1.65742	2.02575	0.453925	1.14251	0.564277	1.05409	AT1G12700	40.984	9.13e-157	466	RPF1	RNA processing factor 1|T12C24.31|T12C24_31	RNA processing FACTOR
arahy.6LU9QM	5.11262	0.0024247	yellow	ZH16_S2;	504	0.919163	177.427	arahy.Tifrunner.gnm2.Arahy.04	123684344	123686382	PPR	--	Pentatricopeptide repeat (PPR) superfamily protein		arahy.6LU9QM	0.227947	1.21858	0.723272	0.550706	0.0495207	0.0257191	0.0502912	0	AT1G80880	55.234	0	524	AT1G80880	F23A5.24|F23A5_24	Tetratricopeptide repeat (TPR)-like superfamily protein
arahy.7GG78Q	3.44245	0.0201917	yellow	ZH16_S2;	504	0.939434	205.025	arahy.Tifrunner.gnm2.Arahy.15	142356703	142362645	PPR	--	Pentatricopeptide repeat (PPR) superfamily protein		arahy.7GG78Q	0.616397	1.83991	0.903745	0.902361	0.0442304	0.103589	0.039924	0	AT1G62930	37.604	7.12e-137	417	RPF3	F16P17.7|F16P17_7|RNA processing factor 3	Tetratricopeptide repeat (TPR)-like superfamily protein
arahy.83WUCG	1.96237	0.00747606	yellow	ZH16_S2;	504	0.908468	175.27	arahy.Tifrunner.gnm2.Arahy.15	142131041	142134069	PPR	--	Pentatricopeptide repeat (PPR) superfamily protein		arahy.83WUCG	0.764072	4.23788	2.19715	1.95099	0.259043	1.06992	0.697134	1.09988	AT1G62930	38.063	1.12e-105	327	RPF3	F16P17.7|F16P17_7|RNA processing factor 3	Tetratricopeptide repeat (TPR)-like superfamily protein
arahy.90E6RV	3.334	0.0144458	yellow	ZH16_S2;	504	0.948471	219.316	arahy.Tifrunner.gnm2.Arahy.15	154870315	154872117	PPR	--	Pentatricopeptide repeat (PPR) superfamily protein		arahy.90E6RV	0.564008	3.47662	1.47514	1.27082	0.0401275	0.523558	0.235442	0.192051	AT1G12700	37.521	5.23e-152	451	RPF1	RNA processing factor 1|T12C24.31|T12C24_31	RNA processing FACTOR
arahy.9TZZ10	2.29782	0.00740384	yellow	ZH16_S2;	504	0.945055	200.033	arahy.Tifrunner.gnm2.Arahy.04	125305416	125312462	PPR	--	Pentatricopeptide repeat (PPR) superfamily protein		arahy.9TZZ10	0.515293	2.86708	1.16126	1.3552	0.0897991	0.0504852	0.0173178	0.0354721	AT3G02330	56.806	0	890	AT3G02330	F11A12.2|F11A12_2	Pentatricopeptide repeat (PPR) superfamily protein
arahy.H8YVTX	3.09243	0.000703782	yellow	ZH16_S2;	504	0.852705	161.534	arahy.Tifrunner.gnm2.Arahy.04	125258860	125260911	PPR	--	Pentatricopeptide repeat (PPR) superfamily protein		arahy.H8YVTX	2.21513	3.94236	2.47253	2.07724	0.234068	0.0724853	0.0692226	0	AT3G29290	47.752	1.3e-151	448	emb2076	embryo defective 2076	Pentatricopeptide repeat (PPR) superfamily protein
arahy.IS373J	2.31267	0.00702408	yellow	ZH16_S2;	504	0.900279	175.735	arahy.Tifrunner.gnm2.Arahy.15	154052725	154054518	PPR	--	Pentatricopeptide repeat (PPR) superfamily protein		arahy.IS373J	0.163969	2.05386	1.21791	1.00474	0.134921	0.451318	0.370114	0.413349	AT1G12700	42.197	1.09e-157	465	RPF1	RNA processing factor 1|T12C24.31|T12C24_31	RNA processing FACTOR
arahy.N66XHA	1.88899	0.0350339	yellow	ZH16_S2;	504	0.958516	225.69	arahy.Tifrunner.gnm2.Arahy.04	125550389	125552317	PPR	--	Pentatricopeptide repeat (PPR) superfamily protein		arahy.N66XHA	3.00473	11.2633	4.11156	4.53708	0.801051	0.424204	0.0677154	0	AT3G02490	48.338	0	603	AT3G02490	F16B3.12|F16B3_12	Pentatricopeptide repeat (PPR) superfamily protein
arahy.PV0ABM	2.65502	0.00187747	yellow	ZH16_S2;	504	0.976623	236.039	arahy.Tifrunner.gnm2.Arahy.14	82510219	82516762	PPR	--	Pentatricopeptide repeat (PPR) superfamily protein		arahy.PV0ABM	0.915384	4.68771	1.61336	2.21098	0.123114	0.162283	0.071002	0	AT5G65560	50.112	0	897	AT5G65560	K21L13.7|K21L13_7	Pentatricopeptide repeat (PPR) superfamily protein
arahy.U3A0V6	4.80153	2.27965e-05	yellow	ZH16_S2;	504	0.981951	247.224	arahy.Tifrunner.gnm2.Arahy.03	99121313	99127679	PPR	--	Pentatricopeptide repeat (PPR) superfamily protein		arahy.U3A0V6	0.638113	6.22481	2.37482	1.94299	0.350828	0.233251	0.0408607	0	AT1G64430	57.143	0	660	AT1G64430	F15H21.10|F15H21_10	Pentatricopeptide repeat (PPR) superfamily protein
arahy.UEZ3ZF	2.9416	0.00299293	yellow	ZH16_S2;	504	0.967712	226.939	arahy.Tifrunner.gnm2.Arahy.15	142308699	142313806	PPR	--	Pentatricopeptide repeat (PPR) superfamily protein		arahy.UEZ3ZF	1.7282	6.68345	2.7664	3.52472	0.181056	0.36884	0.073549	0	AT3G17970	53.977	1.39e-52	177	TOC64-III	AT3G17960|atToc64-III|translocon at the outer membrane of chloroplasts 64-III	translocon at the outer membrane of chloroplasts 64-III
arahy.V0KD92	1.08242	0.0386697	yellow	ZH16_S2;	504	0.912048	217.325	arahy.Tifrunner.gnm2.Arahy.05	89997819	89999588	PPR	--	Pentatricopeptide repeat (PPR) superfamily protein		arahy.V0KD92	1.89888	3.70766	2.0833	1.77199	0.898697	1.80549	1.08849	0.966362	AT1G12700	38.527	2.65e-153	454	RPF1	RNA processing factor 1|T12C24.31|T12C24_31	RNA processing FACTOR
arahy.X62M7H	5.44087	3.20918e-06	yellow	ZH16_S2;	504	0.91415	175.616	arahy.Tifrunner.gnm2.Arahy.04	125253665	125257438	PPR	--	Pentatricopeptide repeat (PPR) superfamily protein		arahy.X62M7H	0.657099	7.98282	4.12609	1.94603	0.756087	0.190374	0.104234	0	AT2G31400	51.657	0	880	GUN1	T28P16.11|T28P16_11|genomes uncoupled 1	s uncoupled 1
arahy.KHQ45H	3.55546	9.47659e-08	yellow	ZH16_S2;	504	0.965059	250.199	arahy.Tifrunner.gnm2.Arahy.15	114523991	114526600	Kinase	--	protein kinase family protein		arahy.KHQ45H	12.3195	38.6678	13.1658	11.3757	0.879876	2.32761	0.613736	0.278465	AT1G51880	60.241	2.58e-27	108	RHS6	T14L22.9|T14L22_9|root hair specific 6	root hair specific 6
arahy.4D26T3	1.43484	0.00227497	yellow	ZH16_S2;	504	0.822738	222.427	arahy.Tifrunner.gnm2.Arahy.18	132988913	132990570	Kinase	--	Protein kinase superfamily protein		arahy.4D26T3	8.13565	23.8436	6.47612	7.01238	4.80792	8.39178	6.6621	7.0552	AT3G18040	58.929	4.95e-60	192	MPK9	MAP kinase 9	MAP kinase 9
arahy.I9KCKB	1.67129	0.00154923	yellow	ZH16_S2;	504	0.850268	305.863	arahy.Tifrunner.gnm2.Arahy.17	10293007	10306591	Kinase	--	Protein kinase superfamily protein		arahy.I9KCKB	0.959152	10.305	1.73233	2.44363	0.655689	3.14077	1.81729	2.10941	AT2G40120	64.179	9.21e-141	427	AT2G40120	T7M7.1|T7M7_1	Protein kinase superfamily protein
arahy.IY6P5S	3.561	7.38052e-07	yellow	ZH16_S2;	504	0.897686	209.541	arahy.Tifrunner.gnm2.Arahy.05	8314264	8318032	Kinase	--	Protein kinase superfamily protein		arahy.IY6P5S	10.5052	19.6667	9.54091	12.4925	0.907063	0.444681	0.210696	0.443379	AT4G02630	72.055	0	610	AT4G02630	T10P11.10|T10P11_10	Protein kinase superfamily protein
arahy.L34ABA	3.49676	6.41935e-06	yellow	ZH16_S2;	504	0.94076	214.821	arahy.Tifrunner.gnm2.Arahy.14	122030041	122032406	Kinase	--	Protein kinase superfamily protein		arahy.L34ABA	4.43365	12.7628	5.48464	8.68189	0.305273	0.507703	0.225471	0	AT4G35780	52.577	6.45e-30	115	STY17	F4B14.1|serine/threonine/tyrosine kinase 17	ACT-like protein tyrosine kinase family protein
arahy.PE1GUB	4.52313	4.30993e-05	yellow	ZH16_S2;	504	0.824524	123.109	arahy.Tifrunner.gnm2.Arahy.04	124665018	124667703	Kinase	--	Protein kinase superfamily protein		arahy.PE1GUB	1.81646	4.5988	3.34245	1.31776	0.386526	0.201819	0	0	AT3G51550	31.733	8.29e-47	178	FER	FERONIA	Malectin/receptor-like protein kinase family protein
arahy.TR1S4A	3.18148	4.36741e-06	yellow	ZH16_S2;	504	0.973251	242.64	arahy.Tifrunner.gnm2.Arahy.05	24395164	24399087	Kinase	--	Protein kinase superfamily protein		arahy.TR1S4A	8.02816	28.3167	8.09127	10.9037	0.828955	0.0934731	0.231942	0	AT5G56630	65.625	5.87e-06	42	PFK7	MIK19.8|MIK19_8|phosphofructokinase 7	phosphofructokinase 7
arahy.6A3U8Z	5.79172	0.0365338	yellow	ZH16_S2;	504	0.866031	159.976	arahy.Tifrunner.gnm2.Arahy.16	131569754	131570343	Kinase	--	receptor-like kinase		arahy.6A3U8Z	0.38237	13.7152	2.40882	7.15427	0.18915	3.72874	1.40868	0	AT5G21090	44.444	7.29e-23	87.4	AT5G21090	-	Leucine-rich repeat (LRR) family protein
arahy.GRN8HF	1.9009	0.0058855	yellow	ZH16_S2;	504	0.819714	156.125	arahy.Tifrunner.gnm2.Arahy.11	123925502	123928485	Kinase	--	receptor-like kinase		arahy.GRN8HF	0.577545	5.57304	3.41783	0.605079	0.140868	1.43705	0.327008	0.495376	AT2G01980	54.14	4.02e-43	158	SOS1	ARABIDOPSIS NA+/H+ ANTIPORTER 7|ARABIDOPSIS SALT OVERLY SENSITIVE 1|ATNHX7|ATSOS1|F14H20.5|F14H20_5|SALT OVERLY SENSITIVE 1	sodium proton exchanger, putative (NHX7) (SOS1)
arahy.57QH9P	6.4661	0.0156047	yellow	ZH16_S2;	504	0.866824	222.217	arahy.Tifrunner.gnm2.Arahy.15	154917704	154920322	Kinase	--	receptor-like kinase 1		arahy.57QH9P	0.146909	2.52228	0.345814	0.0303794	0	0.0455194	0	0	AT2G36570	34.658	1.4e-79	259	AT2G36570	F1O11.20|F1O11_20|PXC1|PXY/TDR-correlated 1	Leucine-rich repeat protein kinase family protein
arahy.ZX85RL	2.76892	0.00284975	yellow	ZH16_S2;	504	0.874836	143.499	arahy.Tifrunner.gnm2.Arahy.20	73226981	73229447	Kinase	--	receptor-like kinase 1		arahy.ZX85RL	2.45663	6.69969	3.3147	2.01776	1.11252	0.865214	0.851996	0.854366	AT1G79620	53.896	1.31e-44	158	AT1G79620	F20B17.5|F20B17_5	Leucine-rich repeat protein kinase family protein
arahy.8WZF3G	1.9899	0.038423	yellow	ZH16_S2;	504	0.889424	231.011	arahy.Tifrunner.gnm2.Arahy.04	110408888	110412196	Kinase	--	receptor-like kinase 902		arahy.8WZF3G	0.265396	1.62547	0.588789	0.389506	0.243893	0.385666	0.214214	0.263848	AT5G58300	59.098	0	701	AT5G58300	MCK7.17|MCK7_17	Leucine-rich repeat protein kinase family protein
arahy.13T34P	2.5406	0.015004	yellow	ZH16_S2;	504	0.94595	205.149	arahy.Tifrunner.gnm2.Arahy.06	68773790	68775254	Kinase	--	receptor-like kinase		arahy.13T34P	3.2639	19.288	5.18489	11.0095	0.509811	3.18311	2.44258	1.07442	AT1G60800	64.407	6.03e-47	162	NIK3	AtNIK3|F8A5.31|F8A5_31|NSP-interacting kinase 3	NSP-interacting kinase 3
arahy.BXF2YD	5.06481	0.039881	yellow	ZH16_S2;	504	0.816253	148.299	arahy.Tifrunner.gnm2.Arahy.04	123741081	123745730	Kinase	--	receptor-like protein kinase 2	Wang et al., 2018	arahy.BXF2YD	0.0572948	0.825859	0.181895	0.0435648	0.0485599	0.03492	0	0	AT2G34930	35.321	2.43e-127	410	AT2G34930	F19I3.16|F19I3_16	disease resistance family protein / LRR family protein
arahy.DR45AA	5.95293	7.08308e-10	yellow	ZH16_S2;	504	0.937097	193.714	arahy.Tifrunner.gnm2.Arahy.04	125422604	125427004	Kinase	--	receptor-like protein kinase 2		arahy.DR45AA	1.22602	10.6811	6.48118	4.40753	0.614423	0.159591	0.103057	0	AT5G16000	74.479	0	590	NIK1	AtNIK1|F1N13.140|F1N13_140|NSP-interacting kinase 1	NSP-interacting kinase 1
arahy.VPK6PF	6.31738	1.04306e-07	yellow	ZH16_S2;	504	0.895591	154.892	arahy.Tifrunner.gnm2.Arahy.15	25525637	25526680	Kinase	--	receptor-like protein kinase 2		arahy.VPK6PF	7.22301	41.8079	21.0056	28.6536	1.37652	0.452987	0.273356	0	AT5G01950	63.448	1.06e-55	185	AT5G01950	T20L15.220|T20L15_220	Leucine-rich repeat protein kinase family protein

## Sheet: red-hub-heatmap
Geneid	log2FoldChange	padj	Module	module-related-trait	gene_sum	kME	kWithin	Chr	start_pos	end_pos	Type	TF	Function	Reference	geneID	ZH16_S1	ZH16_S2	ZH16_S3	ZH16_S4	ZH6_S1	ZH6_S2	ZH6_S3	ZH6_S4	AT_id	identity	Evalue	alignde_aa_length	Symbol	Synonyms	description
arahy.674JY7	-2.85975	4.30426e-06	red	ZH6_S2;	244	0.943254	124.284	arahy.Tifrunner.gnm2.Arahy.07	51231717	51238707	Transcript factor	G2-like	myb-like DNA-binding domain, shaqkyf class protein		arahy.674JY7	0.581288	2.61471	1.32327	0.962082	4.0714	22.6744	19.7627	18.0698	AT2G40260	77.778	7.59e-10	59.7	AT2G40260	T7M7.13	Homeodomain-like superfamily protein
arahy.Z9T13B	-4.98773	0.00467317	red	ZH6_S2;	244	0.97427	159.61	arahy.Tifrunner.gnm2.Arahy.18	52610318	52614451	Transcript factor	IWS1	uncharacterized protein LOC100527694 isoform X1		arahy.Z9T13B	0	0	0.0284544	0.0425601	0.803381	5.18509	3.10994	1.62901	AT5G40710	68.333	6.6e-22	93.2	AT5G40710	MNF13.27|MNF13_27	zinc finger (C2H2 type) family protein
arahy.A8KD6A	-7.35141	1.14209e-06	red	ZH6_S2;	244	0.848981	109.565	arahy.Tifrunner.gnm2.Arahy.10	15952665	15955553	Transcript factor	M-type_MADS	30S ribosomal protein S13		arahy.A8KD6A	0	0	0.425566	0	3.44762	6.10996	7.66061	6.28349	AT5G14320	66.957	2.94e-45	153	EMB3137	EMBRYO DEFECTIVE 3137|F18O22.110|F18O22_110	Ribosomal protein S13/S18 family
arahy.I2W0HI	-7.07408	1.70126e-06	red	ZH6_S2;	244	0.979047	161.62	arahy.Tifrunner.gnm2.Arahy.03	142491145	142494636	Transcript factor	SBP	squamosa promoter-binding-like protein 12-like isoform X6		arahy.I2W0HI	0	1.197	0.658702	0.805752	2.10981	8.8244	5.83036	4.42097	AT5G43270	40.945	3.73e-58	197	SPL2	MNL12.9|MNL12_9|SQUAMOSA PROMOTER BINDING PROTEIN-LIKE 2|squamosa promoter binding protein-like 2	squamosa promoter binding protein-like 2
arahy.9A92AA	-7.96109	1.15102e-08	red	ZH6_S2;	244	0.943818	150.516	arahy.Tifrunner.gnm2.Arahy.20	23227310	23231196	Transcript factor	SNF2	DNA binding,ATP binding,nucleic acid bindin isoform 2 n=1 Tax=Theobroma cacao RepID=UPI00042B44E2		arahy.9A92AA	0	0	0.17674	0.025027	4.18853	8.04455	6.65689	4.48124	AT3G54280	73.239	3.45e-27	108	RGD3	ATBTAF1|BTAF1|CHA16|CHR16|ROOT GROWTH DEFECTIVE 3	ROOT GROWTH DEFECTIVE 3
arahy.SF8VIF	-6.16531	0.000115757	red	ZH6_S2;	244	0.876316	97.5556	arahy.Tifrunner.gnm2.Arahy.16	133545672	133547026	Transcript factor	TF	general transcription factor 3C-like protein	Wang et al., 2019	arahy.SF8VIF	0	0.0762255	0.431249	0.0973596	4.00841	14.6533	15.1768	7.37782	AT5G24450	48.101	2.78e-18	79.7	AT5G24450	T31K7.3|T31K7_3	Transcription factor IIIC, subunit 5
arahy.J633C6	-1.42512	0.025719	red	ZH6_S2;	244	0.866413	128.705	arahy.Tifrunner.gnm2.Arahy.14	117670077	117677641	Phytohormone	--	alanine:glyoxylate aminotransferase 3		arahy.J633C6	0.823624	1.32553	1.94833	0.402758	2.14193	5.34763	3.27008	1.31307	AT3G08860	62.376	0	539	PYD4	PYRIMIDINE 4	PYRIMIDINE 4
arahy.HDV1A7	-3.06002	1.93888e-08	red	ZH6_S2;	244	0.974421	154.799	arahy.Tifrunner.gnm2.Arahy.14	18407047	18409728	Phytohormone	--	auxin canalisation protein		arahy.HDV1A7	0.948549	1.7554	5.12261	0	8.00464	21.2303	15.7314	10.8426	AT4G14740	67.47	9.12e-16	73.9	AT4G14740	DL3410C|FCAALL.302	auxin canalization protein (DUF828)
arahy.FDTJ9Q	-1.47933	0.000243361	red	ZH6_S2;	244	0.929313	141.022	arahy.Tifrunner.gnm2.Arahy.14	139412225	139432283	Phytohormone	--	auxin transport protein (BIG)		arahy.FDTJ9Q	7.84904	12.4354	10.8849	11.4096	15.0316	33.6348	23.5983	19.45	AT3G02260	41.061	2.01e-57	201	BIG	ASA1|ATTENUATED SHADE AVOIDANCE 1|CORYMBOSA1|CRM1|DARK OVER-EXPRESSION OF CAB 1|DOC1|F14P3.3|F14P3_3|LOW PHOSPHATE-RESISTANT ROOT 1|LPR1|TIR3|TRANSPORT INHIBITOR RESPONSE 3|UMB1|UMBRELLA 1	auxin transport protein (BIG)
arahy.4QP1TN	-6.36161	2.80973e-05	red	ZH6_S2;	244	0.949493	129.639	arahy.Tifrunner.gnm2.Arahy.13	127943040	127943404	Phytohormone	--	zinc finger CCCH domain-containing protein 48-like isoform X1		arahy.4QP1TN	0	0.385315	0.739315	0	8.94246	53.8659	45.6442	35.7437	AT5G51980	52	1.05e-23	92.8	AT5G51980	MSG15.6|MSG15_6	Transducin/WD40 repeat-like superfamily protein
arahy.RUY2TK	-5.87959	0.000576706	red	ZH6_S2;	244	0.881633	123.408	arahy.Tifrunner.gnm2.Arahy.18	34606462	34610476	Ubiquitin-proteasome pathway	--	E3 ubiquitin-protein ligase XBAT33-like isoform X1	Wang et al., 2018	arahy.RUY2TK	0	1.39155	0	0	1.50743	3.43033	1.65517	1.45471	AT5G07270	71.667	3.55e-20	91.7	XBAT33	T28J14.210|T28J14_210|XB3 ortholog 3 in Arabidopsis thaliana	hypothetical protein
arahy.VBA0Y3	-5.47501	0.000914766	red	ZH6_S2;	244	0.96988	187.502	arahy.Tifrunner.gnm2.Arahy.15	148723669	148731702	Ubiquitin-proteasome pathway	--	putative E3 ubiquitin-protein ligase LIN-like		arahy.VBA0Y3	0	0.349666	0.132763	0.00781839	0.242887	1.63987	0.955735	0.654815	AT3G06880	23.438	1.7e-32	138	AT3G06880	-	Transducin/WD40 repeat-like superfamily protein
arahy.F63DWU	-7.38611	2.18065e-07	red	ZH6_S2;	244	0.948339	126.569	arahy.Tifrunner.gnm2.Arahy.18	46295353	46298511	Fatty acid synthesis	--	3-oxoacyl-[acyl-carrier-protein] synthase 3 n=2 Tax=Synechococcus RepID=FABH_SYNPW		arahy.F63DWU	0	8.41415	1.36412	0.753814	10.2913	29.5644	28.1125	23.1178	AT1G62640	70.33	2.9e-38	134	KAS III	3-KETOACYL-ACYL CARRIER PROTEIN SYNTHASE III|3-ketoacyl-acyl carrier protein synthase III|T3P18.20|T3P18_20	3-ketoacyl-acyl carrier protein synthase III
arahy.6AK6JC	-3.49278	8.08688e-10	red	ZH6_S2;	244	0.887181	123.917	arahy.Tifrunner.gnm2.Arahy.14	65498427	65503574	Fatty acid synthesis	--	acyl-CoA thioesterase II		arahy.6AK6JC	0.368975	0.331602	1.92647	0.108337	4.09645	7.04805	4.02021	5.41055	AT1G01710	70.213	2.69e-39	145	AT1G01710	T1N6.10|T1N6.9|T1N6_10|T1N6_9	acyl-CoA thioesterase II
arahy.ZVY5TW	-7.45126	1.53207e-07	red	ZH6_S2;	244	0.975957	163.981	arahy.Tifrunner.gnm2.Arahy.15	91261485	91265670	Fatty acid synthesis	--	acyl-CoA thioesterase II		arahy.ZVY5TW	0	0.0491569	0.266095	0	3.79974	13.9615	8.20237	5.73232	AT1G01710	72.527	7.17e-43	153	AT1G01710	T1N6.10|T1N6.9|T1N6_10|T1N6_9	acyl-CoA thioesterase II
arahy.WDY3XU	-6.01314	0.000357526	red	ZH6_S2;	244	0.93999	129.971	arahy.Tifrunner.gnm2.Arahy.13	127879356	127881997	Fatty acid synthesis	--	CAAX amino terminal protease family protein		arahy.WDY3XU	0.0722255	0	0.184055	0	4.72894	13.875	7.19207	3.7254	AT3G26085	47.857	4.65e-26	102	AT3G26085	-	CAAX amino terminal protease family protein
arahy.F45T9K	-7.20472	1.06971e-06	red	ZH6_S2;	244	0.967344	148.289	arahy.Tifrunner.gnm2.Arahy.03	134265835	134266921	Fatty acid synthesis	--	Polyketide cyclase/dehydrase and lipid transport superfamily protein		arahy.F45T9K	0.140093	0.538113	0.779478	0	20.9358	47.6563	34.4997	28.244	AT5G06440	44.444	4.58e-11	58.5	AT5G06440	MHF15.4|MHF15_4	polyketide cyclase/dehydrase/lipid transport superfamily protein
arahy.0V01Q6	-4.97053	0.0315433	red	ZH6_S2;	244	0.863056	81.9602	arahy.Tifrunner.gnm2.Arahy.10	16004218	16009081	Starch and sucrose metabolism	--	malate synthase		arahy.0V01Q6	0.0231864	0.0205205	0.0607525	0.02621	0.311423	0.790177	1.05974	0.463671	AT5G03860	74.336	1.18e-58	194	MLS	MED24.5|malate synthase	malate synthase
arahy.RYU1I8	-6.73026	3.06939e-08	red	ZH6_S2;	244	0.961792	139.856	arahy.Tifrunner.gnm2.Arahy.15	18789116	18793663	Starch and sucrose metabolism	--	glucan endo-1,3-beta-glucosidase-like protein		arahy.RYU1I8	0.0852173	0.620749	0.502201	0	9.4784	32.0902	25.8673	21.7402	AT1G66250	83.333	2.08e-35	134	AT1G66250	T6J19.7|T6J19_7	O-Glycosyl hydrolases family 17 protein
arahy.7JQX15	-3.81372	1.55465e-47	red	ZH6_S2;	244	0.873875	127.887	arahy.Tifrunner.gnm2.Arahy.20	131870933	131880508	Starch and sucrose metabolism	--	glucose-6-phosphate isomerase		arahy.7JQX15	2.39856	5.90221	2.84374	2.99701	33.075	40.8235	25.48	16.0823	AT5G42740	84.201	0	971	AT5G42740	MJB21.12|MJB21_12	Sugar isomerase (SIS) family protein
arahy.WLHM97	-7.40625	0.000364044	red	ZH6_S2;	244	0.811163	76.1858	arahy.Tifrunner.gnm2.Arahy.11	125304311	125308056	Starch and sucrose metabolism	--	glycogen/starch/alpha-glucan phosphorylase family protein		arahy.WLHM97	0	0	0.518523	0	0.193562	2.05184	2.35499	0.728143	AT3G29320	71.667	6.52e-23	99	PHS1	ATPHS1|MUO10.17|alpha-glucan phosphorylase 1	Glycosyl transferase, family 35
arahy.B5ZMPY	-4.69123	0.0230439	red	ZH6_S2;	244	0.841447	130.685	arahy.Tifrunner.gnm2.Arahy.13	2895002	2897485	Starch and sucrose metabolism	--	xyloglucan endotransglucosylase/hydrolase 32		arahy.B5ZMPY	0.0219803	0.505676	9.93011	7.59674	0.601443	67.4751	28.5218	10.506	AT2G36870	70.52	4.18e-85	251	XTH32	AtXTH32|T1J8.5|T1J8_5|xyloglucan endotransglucosylase/hydrolase 32	xyloglucan endotransglucosylase/hydrolase 32
arahy.7JS874	-7.60592	0.000119136	red	ZH6_S2;	244	0.929391	124.39	arahy.Tifrunner.gnm2.Arahy.14	12349193	12352092	ABC transporter	--	ABC transporter A family member 1-like isoform X3		arahy.7JS874	0	0	0.0589292	0	0.479152	6.24515	4.89491	3.64311	AT2G41700	76.667	1.21e-07	50.8	ABCA1	ATP-binding cassette A1|Arabidopsis thaliana ATP-binding cassette A1|AtABCA1	ATP-binding cassette A1
arahy.7AH9CA	-1.00787	0.0102554	red	ZH6_S2;	244	0.860223	180.64	arahy.Tifrunner.gnm2.Arahy.15	12190646	12194366	Cytochrome P450	--	Cytochrome P450 superfamily protein		arahy.7AH9CA	4.32222	5.91014	5.12463	3.48265	3.83643	11.5777	6.58222	6.1536	AT4G36380	62.914	0	602	ROT3	AP22.10|AP22_10|CYP90C1|ROTUNDIFOLIA 3	Cytochrome P450 superfamily protein
arahy.1I1C4M	-1.27365	1.92528e-05	red	ZH6_S2;	244	0.869982	316.686	arahy.Tifrunner.gnm2.Arahy.14	139647642	139651510	PPR	--	Pentatricopeptide repeat (PPR) superfamily protein		arahy.1I1C4M	1.20291	9.27575	5.29496	2.80252	2.87104	19.297	10.0194	6.6352	AT2G31400	51.771	0	878	GUN1	T28P16.11|T28P16_11|genomes uncoupled 1	s uncoupled 1
arahy.JQA4UT	-3.98213	0.00846352	red	ZH6_S2;	244	0.869871	106.107	arahy.Tifrunner.gnm2.Arahy.10	100749332	100751632	PPR	--	Pentatricopeptide repeat (PPR) superfamily protein	Zhang et al., 2017	arahy.JQA4UT	0.0439491	0.203459	0.597444	0.106043	0.638313	1.37066	0.998132	0.828556	AT2G16880	48.309	0	660	AT2G16880	F12A24.6|F12A24_6	Pentatricopeptide repeat (PPR) superfamily protein
arahy.SZ4JBM	-1.15754	3.18268e-10	red	ZH6_S2;	244	0.8882	184.781	arahy.Tifrunner.gnm2.Arahy.14	137811092	137817706	PPR	--	Pentatricopeptide repeat (PPR) superfamily protein	Wang et al., 2018	arahy.SZ4JBM	1.11006	4.61057	3.99683	3.06554	2.16224	9.99307	7.53299	7.52321	AT3G29230	57.534	0	725	AT3G29230	-	Tetratricopeptide repeat (TPR)-like superfamily protein
arahy.T191C4	-1.23986	0.025409	red	ZH6_S2;	244	0.884019	200.417	arahy.Tifrunner.gnm2.Arahy.14	139651556	139655882	PPR	--	Pentatricopeptide repeat (PPR) superfamily protein		arahy.T191C4	0.829984	2.27443	1.73226	1.23133	1.08653	5.25058	3.37332	2.20283	AT3G29290	48.156	5.93e-151	450	emb2076	embryo defective 2076	Pentatricopeptide repeat (PPR) superfamily protein
arahy.A6X2CD	-1.06365	0.0048229	red	ZH6_S2;	244	0.853729	91.896	arahy.Tifrunner.gnm2.Arahy.20	126352630	126356125	Kinase	--	Protein kinase superfamily protein		arahy.A6X2CD	16.1416	27.1607	14.9006	15.0849	29.6477	39.8048	31.7651	28.6081	AT4G32660	72.843	0	614	AME3	F4D11.140|F4D11_140	Protein kinase superfamily protein
arahy.GPB067	-7.01088	0.021579	red	ZH6_S2;	244	0.879499	110.652	arahy.Tifrunner.gnm2.Arahy.15	71641446	71644736	Kinase	--	Protein kinase superfamily protein		arahy.GPB067	0.061093	0	0.03744	0	0.191942	2.6328	1.37767	0.271837	AT3G21630	62.778	2.84e-71	230	CERK1	AtCERK1|AtLYK1|LYK1|LYSM DOMAIN RECEPTOR-LIKE KINASE 1|LYSM RLK1|LysM-containing receptor-like kinase 1|chitin elicitor receptor kinase 1	chitin elicitor receptor kinase 1
arahy.LEZ1PQ	-8.65628	2.25504e-10	red	ZH6_S2;	244	0.982742	155.711	arahy.Tifrunner.gnm2.Arahy.20	115275000	115275527	Kinase	--	Protein kinase superfamily protein		arahy.LEZ1PQ	0	0.325801	1.68171	0.124134	28.6036	108.722	77.3723	69.2118	AT4G33950	83.871	1.2e-54	174	OST1	ATOST1|F17I5.140|F17I5_140|OPEN STOMATA 1|P44|SNF1-RELATED PROTEIN KINASE 2.6|SNRK2-6|SNRK2.6|SRK2E|SUCROSE NONFERMENTING 1-RELATED PROTEIN KINASE 2-6	Protein kinase superfamily protein
arahy.S5Z9V6	-1.11816	6.03894e-05	red	ZH6_S2;	244	0.90505	199.708	arahy.Tifrunner.gnm2.Arahy.13	138867130	138870380	Kinase	--	Protein kinase superfamily protein		arahy.S5Z9V6	3.7044	7.98209	4.04854	3.81928	4.82711	11.5417	8.96519	7.78876	AT1G18040	72.589	0	581	CDKD1;3	AT;CDCKD;3|CAK2AT|CYCLIN-DEPENDENT KINASE D1;3|T10F20.5|T10F20_5|cyclin-dependent kinase D1;3	cyclin-dependent kinase D1;3
