# Supplementary material for: Global Transcriptome and Co-Expression Network Analyses Revealed Hub Genes Controlling Seed Size/Weight and/or Oil Content in Peanut
Source: Plants (Basel). 2023 Aug 31;12(17):3144. doi: 10.3390/plants12173144 (PMC10490140; doi:10.3390/plants12173144)
Supplement: Supplementary file 1 [file plants-12-03144-s001.zip › Table S7.xlsx]

## Sheet: Readme
Table S7 Information of reported QTL or genes related to seed size/weight and/or oil content in peanut.
Reference:
Alyr, M.H., Pallu, J., Sambou, A., Nguepjop, J.R., Seye, M., Tossim, H.A., et al. (2020). Fine-Mapping of a Wild Genomic Region Involved in Pod and Seed Size Reduction on Chromosome A07 in Peanut (Arachis hypogaea L.). Genes (Basel) 11(12). doi: 10.3390/genes11121402.
Gangurde, S.S., Wang, H., Yaduru, S., Pandey, M.K., Fountain, J.C., Chu, Y., et al. (2020). Nested-association mapping (NAM)-based genetic dissection uncovers candidate genes for seed and pod weights in peanut (Arachis hypogaea). Plant Biotechnol. J. 18(6), 1457-1471. doi: 10.1111/pbi.13311.
Liu, N., Guo, J.B., Zhou, X.J., Wu, B., Huang, L., Luo, H.Y., et al. (2020). High-resolution mapping of a major and consensus quantitative trait locus for oil content to a ~ 0.8-Mb region on chromosome A08 in peanut (Arachis hypogaea L.). Theor. Appl. Genet. 133(1), 37-49. doi: 10.1007/s00122-019-03438-6.
Mondal, S., and Badigannavar, A.M. (2019). Identification of major consensus QTLs for seed size and minor QTLs for pod traits in cultivated groundnut (Arachis hypogaea L.). 3 Biotech. 9(9), 347. doi: 10.1007/s13205-019-1881-7.
Wang, J., Yan, C., Li, Y., Li, C., Zhao, X., Yuan, C., et al. (2019). GWAS Discovery Of Candidate Genes for Yield-Related Traits in Peanut and Support from Earlier QTL Mapping Studies. Genes (Basel) 10(10). doi: 10.3390/genes10100803.
Wang, X.H., Xu, P., Yin, L., Ren, Y., Li, S.L., Shi, Y.M., et al. (2018a). Genomic and Transcriptomic Analysis Identified Gene Clusters and Candidate Genes for Oil Content in Peanut (Arachis hypogaea L.). Plant Mol. Biol. Rep. 36(3), 518-529. doi: 10.1007/s11105-018-1088-9.
Wang, Z., Huai, D., Zhang, Z., Cheng, K., Kang, Y., Wan, L., et al. (2018b). Development of a High-Density Genetic Map Based on Specific Length Amplified Fragment Sequencing and Its Application in Quantitative Trait Loci Analysis for Yield-Related Traits in Cultivated Peanut. Front. Plant Sci. 9, 827. doi: 10.3389/fpls.2018.00827.
Zhang, S., Hu, X., Miao, H., Chu, Y., Cui, F., Yang, W., et al. (2019). QTL identification for seed weight and size based on a high-density SLAF-seq genetic map in peanut (Arachis hypogaea L.). BMC Plant Biol. 19(1), 537. doi: 10.1186/s12870-019-2164-5.
Zhang, X., Zhang, J., He, X., Wang, Y., Ma, X., and Yin, D. (2017). Genome-Wide Association Study of Major Agronomic Traits Related to Domestication in Peanut. Front. Plant Sci. 8, 1611. doi: 10.3389/fpls.2017.01611.

## Sheet: candidate genes
Trait	Geneid	Reference
seed size/weight	Aradu.094MD	Gangurde et al., 2020
seed size/weight	Aradu.0BA89	Gangurde et al., 2020
seed size/weight	Aradu.0Y2ZI	Gangurde et al., 2020
seed size/weight	Aradu.188J4	Alyr et al., 2020
seed size/weight	Aradu.1K902	Alyr et al., 2020
seed size/weight	Aradu.20W1Q	Gangurde et al., 2020
seed size/weight	Aradu.217QF	Gangurde et al., 2020
seed size/weight	Aradu.2V08S	Alyr et al., 2020
seed size/weight	Aradu.398CK	Gangurde et al., 2020
seed size/weight	Aradu.3FH81	Alyr et al., 2020
seed size/weight	Aradu.3ZE3D	Gangurde et al., 2020
seed size/weight	Aradu.4D2H2	Gangurde et al., 2020
seed size/weight	Aradu.4VU7R	Gangurde et al., 2020
seed size/weight	Aradu.5LG80	Gangurde et al., 2020
seed size/weight	Aradu.5R3CV	Gangurde et al., 2020
seed size/weight	Aradu.6F552	Gangurde et al., 2020
seed size/weight	Aradu.8247R	Alyr et al., 2020
seed size/weight	Aradu.870BG	Alyr et al., 2020
seed size/weight	Aradu.8G9XJ	Alyr et al., 2020
seed size/weight	Aradu.92HAJ	Gangurde et al., 2020
seed size/weight	Aradu.92ILA	Gangurde et al., 2020
seed size/weight	Aradu.92LFJ	Gangurde et al., 2020
seed size/weight	Aradu.A5ZY3	Gangurde et al., 2020
seed size/weight	Aradu.BB0Q9	Gangurde et al., 2020
seed size/weight	Aradu.BD60N	Alyr et al., 2020
seed size/weight	Aradu.BJ9KH	Gangurde et al., 2020
seed size/weight	Aradu.C14VV	Gangurde et al., 2020
seed size/weight	Aradu.CH4M9	Alyr et al., 2020
seed size/weight	Aradu.CKU3N	Gangurde et al., 2020
seed size/weight	Aradu.DN3DB	Gangurde et al., 2020
seed size/weight	Aradu.DN3DB	Alyr et al., 2020
seed size/weight	Aradu.E14DK	Gangurde et al., 2020
seed size/weight	Aradu.E3SP0	Gangurde et al., 2020
seed size/weight	Aradu.EI99W	Gangurde et al., 2020
seed size/weight	Aradu.FL7G4	Gangurde et al., 2020
seed size/weight	Aradu.FX37I	Alyr et al., 2020
seed size/weight	Aradu.G4PX6	Alyr et al., 2020
seed size/weight	Aradu.G6GR7	Gangurde et al., 2020
seed size/weight	Aradu.GAZ1G	Gangurde et al., 2020
seed size/weight	Aradu.GEE52	Gangurde et al., 2020
seed size/weight	Aradu.H6YZR	Gangurde et al., 2020
seed size/weight	Aradu.HR82P	Gangurde et al., 2020
seed size/weight	Aradu.J09QX	Gangurde et al., 2020
seed size/weight	Aradu.J21RS	Alyr et al., 2020
seed size/weight	Aradu.JRV68	Alyr et al., 2020
seed size/weight	Aradu.K1LWM	Gangurde et al., 2020
seed size/weight	Aradu.KY790	Gangurde et al., 2020
seed size/weight	Aradu.L6QML	Gangurde et al., 2020
seed size/weight	Aradu.M7YGM	Gangurde et al., 2020
seed size/weight	Aradu.N0F41	Gangurde et al., 2020
seed size/weight	Aradu.N64BE	Gangurde et al., 2020
seed size/weight	Aradu.P4Y7Y	Gangurde et al., 2020
seed size/weight	Aradu.P9PXC	Gangurde et al., 2020
seed size/weight	Aradu.PD37S	Gangurde et al., 2020
seed size/weight	Aradu.PTC1G	Gangurde et al., 2020
seed size/weight	Aradu.PU85I	Gangurde et al., 2020
seed size/weight	Aradu.PW2UM	Gangurde et al., 2020
seed size/weight	Aradu.PWJ6Q	Alyr et al., 2020
seed size/weight	Aradu.R4P73	Gangurde et al., 2020
seed size/weight	Aradu.RLZ61	Alyr et al., 2020
seed size/weight	Aradu.SFU0J	Alyr et al., 2020
seed size/weight	Aradu.T6HPR	Gangurde et al., 2020
seed size/weight	Aradu.T7HWZ	Gangurde et al., 2020
seed size/weight	Aradu.TA25T	Gangurde et al., 2020
seed size/weight	Aradu.TGL7C	Gangurde et al., 2020
seed size/weight	Aradu.TGV6P	Gangurde et al., 2020
seed size/weight	Aradu.U13TY	Gangurde et al., 2020
seed size/weight	Aradu.U4S3Y	Gangurde et al., 2020
seed size/weight	Aradu.UND00	Gangurde et al., 2020
seed size/weight	Aradu.V498C	Gangurde et al., 2020
seed size/weight	Aradu.VSE1D	Gangurde et al., 2020
seed size/weight	Aradu.VVP26	Gangurde et al., 2020
seed size/weight	Aradu.WDU9W	Alyr et al., 2020
seed size/weight	Aradu.WGI5L	Alyr et al., 2020
seed size/weight	Aradu.X1L7N	Alyr et al., 2020
seed size/weight	Aradu.X2HYI	Gangurde et al., 2020
seed size/weight	Aradu.X5WFU	Gangurde et al., 2020
seed size/weight	Aradu.X8TIY	Gangurde et al., 2020
seed size/weight	Aradu.XJ0L1	Alyr et al., 2020
seed size/weight	Aradu.XLV7R	Alyr et al., 2020
seed size/weight	Aradu.XZ2H6	Gangurde et al., 2020
seed size/weight	Aradu.Y2XHP	Gangurde et al., 2020
seed size/weight	Aradu.Y5JUW	Gangurde et al., 2020
seed size/weight	Aradu.Z1KSU	Gangurde et al., 2020
seed size/weight	arahy.01YFCZ	Wang et al., 2019
seed size/weight	arahy.032U0L	Zhou et al., 2021
seed size/weight	arahy.03ZR4A	Wang et al., 2019
seed size/weight	arahy.06CJ1U	Wang et al., 2019
seed size/weight	arahy.07DPKN	Wang et al., 2019
seed size/weight	arahy.0CNS1F	Wang et al., 2019
seed size/weight	arahy.0KSV0I	Wang et al., 2019
seed size/weight	arahy.18MKU2	Zhou et al., 2021
seed size/weight	arahy.1E8W48	Zhou et al., 2021
seed size/weight	arahy.1V9TKU	Wang et al., 2019
seed size/weight	arahy.1VF0IH	Wang et al., 2019
seed size/weight	arahy.22EC2Q	Zhou et al., 2021
seed size/weight	arahy.23YNJY	Wang et al., 2019
seed size/weight	arahy.27XFTQ	Wang et al., 2019
seed size/weight	arahy.2BAE9R	Wang et al., 2019
seed size/weight	arahy.2BCF73	Wang et al., 2019
seed size/weight	arahy.2FX3XX	Wang et al., 2019
seed size/weight	arahy.2Q854G	Wang et al., 2019
seed size/weight	arahy.2QI3HV	Wang et al., 2019
seed size/weight	arahy.2XYE8R	Zhou et al., 2021
seed size/weight	arahy.3IZ0NN	Wang et al., 2019
seed size/weight	arahy.3V8M8T	Zhou et al., 2021
seed size/weight	arahy.47XHE0	Wang et al., 2019
seed size/weight	arahy.4AIN5Y	Wang et al., 2019
seed size/weight	arahy.4I7PBY	Wang et al., 2019
seed size/weight	arahy.4JHW71	Zhou et al., 2021
seed size/weight	arahy.4PM453	Wang et al., 2019
seed size/weight	arahy.51A16S	Wang et al., 2019
seed size/weight	arahy.5DN2IL	Zhou et al., 2021
seed size/weight	arahy.5F2ED3	Wang et al., 2019
seed size/weight	arahy.5WGS6V	Wang et al., 2019
seed size/weight	arahy.5X1WX1	Wang et al., 2019
seed size/weight	arahy.63G7RJ	Wang et al., 2019
seed size/weight	arahy.691YBH	Wang et al., 2019
seed size/weight	arahy.6D2WZW	Wang et al., 2019
seed size/weight	arahy.6J07HI	Wang et al., 2019
seed size/weight	arahy.6VQD09	Zhou et al., 2021
seed size/weight	arahy.6W7B85	Wang et al., 2019
seed size/weight	arahy.6WJ0DK	Zhou et al., 2021
seed size/weight	arahy.70FQSK	Wang et al., 2019
seed size/weight	arahy.727DWA	Wang et al., 2019
seed size/weight	arahy.72FWH3	Wang et al., 2019
seed size/weight	arahy.73B1UV	Wang et al., 2019
seed size/weight	arahy.7B5I5W	Wang et al., 2019
seed size/weight	arahy.7FS7F8	Zhou et al., 2021
seed size/weight	arahy.7GY2ZZ	Wang et al., 2019
seed size/weight	arahy.7J3SUQ	Zhou et al., 2021
seed size/weight	arahy.7L8Q37	Wang et al., 2019
seed size/weight	arahy.7LC16L	Wang et al., 2019
seed size/weight	arahy.7RA8NE	Wang et al., 2019
seed size/weight	arahy.808QWK	Wang et al., 2019
seed size/weight	arahy.82PMIG	Zhou et al., 2021
seed size/weight	arahy.84A022	Wang et al., 2019
seed size/weight	arahy.8JFH4G	Wang et al., 2019
seed size/weight	arahy.8L02XW	Zhou et al., 2021
seed size/weight	arahy.8Q755P	Wang et al., 2019
seed size/weight	arahy.8SJW9U	Wang et al., 2019
seed size/weight	arahy.8TF3WB	Zhou et al., 2021
seed size/weight	arahy.8Y74W7	Wang et al., 2019
seed size/weight	arahy.953C08	Wang et al., 2019
seed size/weight	arahy.9899SL	Wang et al., 2019
seed size/weight	arahy.9BIX4A	Wang et al., 2019
seed size/weight	arahy.9H79HM	Zhou et al., 2021
seed size/weight	arahy.9VSU0K	Wang et al., 2019
seed size/weight	arahy.A194LB	Wang et al., 2019
seed size/weight	arahy.A3WBL0	Wang et al., 2019
seed size/weight	arahy.A4HJXM	Wang et al., 2019
seed size/weight	arahy.A8QM82	Wang et al., 2019
seed size/weight	arahy.AA3MKH	Wang et al., 2019
seed size/weight	arahy.ADMQ1S	Wang et al., 2019
seed size/weight	arahy.AF8ALP	Zhou et al., 2021
seed size/weight	arahy.AG2ZXZ	Zhou et al., 2021
seed size/weight	arahy.ALL85F	Zhou et al., 2021
seed size/weight	arahy.ANC9PG	Zhou et al., 2021
seed size/weight	arahy.B29LWX	Wang et al., 2019
seed size/weight	arahy.B2GMFE	Wang et al., 2019
seed size/weight	arahy.B3BHU1	Zhou et al., 2021
seed size/weight	arahy.B3VI1A	Wang et al., 2019
seed size/weight	arahy.B645Y9	Wang et al., 2019
seed size/weight	arahy.BT0HLV	Wang et al., 2019
seed size/weight	arahy.BYT3FC	Wang et al., 2019
seed size/weight	arahy.C14DTV	Wang et al., 2019
seed size/weight	arahy.C1NZN8	Zhou et al., 2021
seed size/weight	arahy.C5UZ0Y	Wang et al., 2019
seed size/weight	arahy.C96CVE	Wang et al., 2019
seed size/weight	arahy.CB89MI	Wang et al., 2019
seed size/weight	arahy.CTV7SW	Wang et al., 2019
seed size/weight	arahy.CUHC67	Wang et al., 2019
seed size/weight	arahy.CV28T2	Zhou et al., 2021
seed size/weight	arahy.CX77FB	Wang et al., 2019
seed size/weight	arahy.CXI9C6	Wang et al., 2019
seed size/weight	arahy.D5GV5Y	Wang et al., 2019
seed size/weight	arahy.DEWH52	Wang et al., 2019
seed size/weight	arahy.DF36MW	Wang et al., 2019
seed size/weight	arahy.DK0QII	Wang et al., 2019
seed size/weight	arahy.DR7X1V	Zhou et al., 2021
seed size/weight	arahy.E7TSIM	Wang et al., 2019
seed size/weight	arahy.E8BYCZ	Wang et al., 2019
seed size/weight	arahy.E8BYCZ	Zhou et al., 2021
seed size/weight	arahy.FD3BFJ	Zhou et al., 2021
seed size/weight	arahy.FHJJ9N	Wang et al., 2019
seed size/weight	arahy.FPV96P	Wang et al., 2019
seed size/weight	arahy.FQB87F	Wang et al., 2019
seed size/weight	arahy.FR0W00	Wang et al., 2019
seed size/weight	arahy.G80LMI	Wang et al., 2019
seed size/weight	arahy.GI1MGH	Wang et al., 2019
seed size/weight	arahy.GL64VW	Wang et al., 2019
seed size/weight	arahy.H0XU4V	Wang et al., 2019
seed size/weight	arahy.H2HD92	Zhou et al., 2021
seed size/weight	arahy.H2TQG4	Wang et al., 2019
seed size/weight	arahy.H3NIE5	Zhou et al., 2021
seed size/weight	arahy.H97NC3	Wang et al., 2019
seed size/weight	arahy.HCD6SP	Wang et al., 2019
seed size/weight	arahy.HED3ZI	Wang et al., 2019
seed size/weight	arahy.HII4RG	Wang et al., 2019
seed size/weight	arahy.HJ1D03	Wang et al., 2019
seed size/weight	arahy.HNU9BA	Zhou et al., 2021
seed size/weight	arahy.I7WSM6	Wang et al., 2019
seed size/weight	arahy.I909QJ	Wang et al., 2019
seed size/weight	arahy.ICF70N	Wang et al., 2019
seed size/weight	arahy.JJ1SBB	Wang et al., 2019
seed size/weight	arahy.JPXG8L	Wang et al., 2019
seed size/weight	arahy.JYTW4X	Wang et al., 2019
seed size/weight	arahy.K3L8DV	Wang et al., 2019
seed size/weight	arahy.K90YWI	Wang et al., 2019
seed size/weight	arahy.KBV6L0	Wang et al., 2019
seed size/weight	arahy.KZLY5F	Wang et al., 2019
seed size/weight	arahy.L9QBLA	Wang et al., 2019
seed size/weight	arahy.M286MP	Wang et al., 2019
seed size/weight	arahy.M6TL6K	Wang et al., 2019
seed size/weight	arahy.M9IPMG	Wang et al., 2019
seed size/weight	arahy.MF71YY	Wang et al., 2019
seed size/weight	arahy.N0MV1J	Wang et al., 2019
seed size/weight	arahy.N1DX8X	Zhou et al., 2021
seed size/weight	arahy.N67PK3	Wang et al., 2019
seed size/weight	arahy.N88R54	Wang et al., 2019
seed size/weight	arahy.NJ6SD5	Wang et al., 2019
seed size/weight	arahy.NNR9F9	Wang et al., 2019
seed size/weight	arahy.NP6VZF	Zhou et al., 2021
seed size/weight	arahy.NT6F81	Wang et al., 2019
seed size/weight	arahy.NXI5US	Zhou et al., 2021
seed size/weight	arahy.P8IBJY	Wang et al., 2019
seed size/weight	arahy.PCB8SU	Wang et al., 2019
seed size/weight	arahy.PD2L4U	Wang et al., 2019
seed size/weight	arahy.PK7WRQ	Wang et al., 2019
seed size/weight	arahy.PW8GWK	Wang et al., 2019
seed size/weight	arahy.Q13343	Wang et al., 2019
seed size/weight	arahy.Q84XAK	Wang et al., 2019
seed size/weight	arahy.Q9SWB6	Wang et al., 2019
seed size/weight	arahy.QDP4P6	Wang et al., 2019
seed size/weight	arahy.QJ62AM	Wang et al., 2019
seed size/weight	arahy.QJ7C3B	Wang et al., 2019
seed size/weight	arahy.QKB4J8	Wang et al., 2019
seed size/weight	arahy.QP0P3V	Zhou et al., 2021
seed size/weight	arahy.QT5RS9	Wang et al., 2019
seed size/weight	arahy.QTWL09	Zhou et al., 2021
seed size/weight	arahy.QVT58A	Wang et al., 2019
seed size/weight	arahy.QXV6BQ	Wang et al., 2019
seed size/weight	arahy.QZI7QE	Wang et al., 2019
seed size/weight	arahy.R1KXAM	Wang et al., 2019
seed size/weight	arahy.R3VUJN	Wang et al., 2019
seed size/weight	arahy.R848WJ	Wang et al., 2019
seed size/weight	arahy.RI9HIF	Wang et al., 2019
seed size/weight	arahy.RXFQ0R	Wang et al., 2019
seed size/weight	arahy.S21HCY	Wang et al., 2019
seed size/weight	arahy.S5JADZ	Zhou et al., 2021
seed size/weight	arahy.S6GYJN	Wang et al., 2019
seed size/weight	arahy.S82084	Wang et al., 2019
seed size/weight	arahy.T0N3P3	Wang et al., 2019
seed size/weight	arahy.TEB2NV	Wang et al., 2019
seed size/weight	arahy.TVM56H	Wang et al., 2019
seed size/weight	arahy.U2V952	Wang et al., 2019
seed size/weight	arahy.U7NLJQ	Wang et al., 2019
seed size/weight	arahy.UR8A7Q	Wang et al., 2019
seed size/weight	arahy.URL2CG	Wang et al., 2019
seed size/weight	arahy.V06H0G	Wang et al., 2019
seed size/weight	arahy.VD3H3C	Wang et al., 2019
seed size/weight	arahy.VQ51EY	Zhou et al., 2021
seed size/weight	arahy.VQJ1P3	Wang et al., 2019
seed size/weight	arahy.VVZ76M	Zhou et al., 2021
seed size/weight	arahy.VYWU26	Wang et al., 2019
seed size/weight	arahy.W52PF9	Wang et al., 2019
seed size/weight	arahy.W69CPD	Wang et al., 2019
seed size/weight	arahy.W9Z2JH	Zhou et al., 2021
seed size/weight	arahy.WLK38G	Zhou et al., 2021
seed size/weight	arahy.X0CD3J	Wang et al., 2019
seed size/weight	arahy.X3TKXF	Wang et al., 2019
seed size/weight	arahy.XA2R2M	Wang et al., 2019
seed size/weight	arahy.XJL156	Wang et al., 2019
seed size/weight	arahy.XQ00W0	Wang et al., 2019
seed size/weight	arahy.XS9ZXI	Wang et al., 2019
seed size/weight	arahy.XVWX7G	Wang et al., 2019
seed size/weight	arahy.Y2DLV0	Wang et al., 2019
seed size/weight	arahy.Y4GE00	Wang et al., 2019
seed size/weight	arahy.YE7AHB	Wang et al., 2019
seed size/weight	arahy.YFH0AU	Wang et al., 2019
seed size/weight	arahy.YQ4984	Wang et al., 2019
seed size/weight	arahy.YTF73Z	Wang et al., 2019
seed size/weight	arahy.Z678E3	Wang et al., 2019
seed size/weight	arahy.ZF4CS3	Wang et al., 2019
seed size/weight	arahy.ZI4JU1	Wang et al., 2019
seed size/weight	arahy.ZI6KUN	Wang et al., 2019
seed size/weight	arahy.ZJYB0J	Wang et al., 2019
seed size/weight	arahy.ZL8GWI	Zhou et al., 2021
seed size/weight	Araip.03SU2	Gangurde et al., 2020
seed size/weight	Araip.0IU0U	Gangurde et al., 2020
seed size/weight	Araip.0P37J	Gangurde et al., 2020
seed size/weight	Araip.1117E	Gangurde et al., 2020
seed size/weight	Araip.22PIW	Gangurde et al., 2020
seed size/weight	Araip.25DGX	Gangurde et al., 2020
seed size/weight	Araip.4WJ3L	Gangurde et al., 2020
seed size/weight	Araip.6B9LC	Gangurde et al., 2020
seed size/weight	Araip.6D2Y5	Gangurde et al., 2020
seed size/weight	Araip.7MV8E	Gangurde et al., 2020
seed size/weight	Araip.8HM3Z	Gangurde et al., 2020
seed size/weight	Araip.914L5	Gangurde et al., 2020
seed size/weight	Araip.B38KN	Gangurde et al., 2020
seed size/weight	Araip.B8DAB	Gangurde et al., 2020
seed size/weight	Araip.C4RFS	Gangurde et al., 2020
seed size/weight	Araip.CA56R	Gangurde et al., 2020
seed size/weight	Araip.DII6F	Gangurde et al., 2020
seed size/weight	Araip.DQ9PJ	Gangurde et al., 2020
seed size/weight	Araip.F02DS	Gangurde et al., 2020
seed size/weight	Araip.F2DLN	Gangurde et al., 2020
seed size/weight	Araip.G1WAG	Gangurde et al., 2020
seed size/weight	Araip.GEV84	Gangurde et al., 2020
seed size/weight	Araip.H8C7N	Gangurde et al., 2020
seed size/weight	Araip.K08HU	Gangurde et al., 2020
seed size/weight	Araip.KM0ZG	Gangurde et al., 2020
seed size/weight	Araip.KTS14	Gangurde et al., 2020
seed size/weight	Araip.L6VN3	Gangurde et al., 2020
seed size/weight	Araip.M90GE	Gangurde et al., 2020
seed size/weight	Araip.MYZ56	Gangurde et al., 2020
seed size/weight	Araip.N2NX2	Gangurde et al., 2020
seed size/weight	Araip.Q22J4	Gangurde et al., 2020
seed size/weight	Araip.Q6KXG	Gangurde et al., 2020
seed size/weight	Araip.Q99H0	Gangurde et al., 2020
seed size/weight	Araip.QE3XT	Gangurde et al., 2020
seed size/weight	Araip.R0K9W	Gangurde et al., 2020
seed size/weight	Araip.R1CPL	Gangurde et al., 2020
seed size/weight	Araip.RH0J3	Gangurde et al., 2020
seed size/weight	Araip.RKA1Y	Gangurde et al., 2020
seed size/weight	Araip.RZ9GH	Gangurde et al., 2020
seed size/weight	Araip.S4N8U	Gangurde et al., 2020
seed size/weight	Araip.S98GY	Gangurde et al., 2020
seed size/weight	Araip.TQ214	Gangurde et al., 2020
seed size/weight	Araip.UC7G4	Gangurde et al., 2020
seed size/weight	Araip.UK7ZJ	Gangurde et al., 2020
seed size/weight	Araip.UT7AT	Gangurde et al., 2020
seed size/weight	Araip.W3PMW	Gangurde et al., 2020
seed size/weight	Araip.X44YM	Gangurde et al., 2020
seed size/weight	Araip.Y2DTS	Gangurde et al., 2020
seed size/weight	Araip.YJX2P	Gangurde et al., 2020
seed size/weight	Araip.YL4Q6	Gangurde et al., 2020
seed size/weight	Araip.YZ9S3	Gangurde et al., 2020
seed size/weight	Araip.Z2RR8	Gangurde et al., 2020
seed oil content	Aradu.R2YUU	Liu et al., 2020
seed oil content	Aradu.P5HL2	Liu et al., 2020
seed oil content	Aradu.R6CHF	Liu et al., 2020
seed oil content	Aradu.0Y2W5	Liu et al., 2020
seed oil content	Aradu.U9CZ6	Liu et al., 2020
seed oil content	Aradu.9A1MD	Liu et al., 2020
seed oil content	Aradu.M9YMG	Liu et al., 2020
seed oil content	Aradu.VL8NS	Liu et al., 2020
seed oil content	Aradu.G6IK8	Liu et al., 2020
seed oil content	Aradu.FJ72W	Liu et al., 2020
seed oil content	Aradu.ZNB2J	Liu et al., 2020
seed oil content	Aradu.3572D	Liu et al., 2020
seed oil content	Aradu.V4IDM	Liu et al., 2020
seed oil content	Aradu.NMU0T	Liu et al., 2020
seed oil content	Aradu.WE8JU	Liu et al., 2020
seed oil content	Aradu.2VA5N	Liu et al., 2020
seed oil content	Aradu.SZ6Y0	Liu et al., 2020
seed oil content	Aradu.8Y6AX	Liu et al., 2020
seed oil content	Aradu.4F4WM	Liu et al., 2020
seed oil content	Aradu.NL01W	Liu et al., 2020
seed oil content	Aradu.G76IS	Liu et al., 2020
seed oil content	Aradu.X3LUW	Liu et al., 2020
seed oil content	Aradu.46B2P	Liu et al., 2020
seed oil content	Aradu.G8908	Liu et al., 2020
seed oil content	Aradu.T9US5	Liu et al., 2020
seed oil content	Aradu.GM7SL	Liu et al., 2020
seed oil content	Aradu.Z1DQ9	Liu et al., 2020
seed oil content	Aradu.2KH9E	Liu et al., 2020
seed oil content	Aradu.E0NVE	Liu et al., 2020
seed oil content	Aradu.AY1JG	Liu et al., 2020
seed oil content	Aradu.39CB1	Liu et al., 2020
seed oil content	Aradu.R1ZAI	Liu et al., 2020
seed oil content	Aradu.73Z43	Liu et al., 2020
seed oil content	Aradu.M24MK	Liu et al., 2020
seed oil content	Aradu.TB2KK	Liu et al., 2020
seed oil content	Aradu.0C2XW	Liu et al., 2020
seed oil content	Aradu.M6MWE	Liu et al., 2020
seed oil content	Aradu.A0XEY	Liu et al., 2020
seed oil content	Aradu.H6WT7	Liu et al., 2020
seed oil content	Aradu.V8FCZ	Liu et al., 2020
seed oil content	Aradu.VLI97	Liu et al., 2020
seed oil content	Aradu.J0G67	Liu et al., 2020
seed oil content	Aradu.PH7AB	Liu et al., 2020
seed oil content	Aradu.KJM0J	Liu et al., 2020
seed oil content	Aradu.39LD8	Liu et al., 2020
seed oil content	Aradu.FC4MN	Liu et al., 2020
seed oil content	Aradu.3I7JS	Liu et al., 2020
seed oil content	Aradu.EF1BQ	Liu et al., 2020
seed oil content	Aradu.IWK4F	Liu et al., 2020
seed oil content	Aradu.1ZF9X	Liu et al., 2020
seed oil content	Aradu.88QB9	Liu et al., 2020
seed oil content	Aradu.UB13R	Liu et al., 2020
seed oil content	Aradu.17HPD	Liu et al., 2020
seed oil content	Aradu.5YY4W	Liu et al., 2020
seed oil content	Aradu.F99PC	Liu et al., 2020
seed oil content	Aradu.72ZZF	Liu et al., 2020
seed oil content	Aradu.X9VB6	Liu et al., 2020
seed oil content	Aradu.I2RY9	Liu et al., 2020
seed oil content	Aradu.8GL4A	Liu et al., 2020
seed oil content	Aradu.18RKY	Liu et al., 2020
seed oil content	Aradu.Z0VJD	Liu et al., 2020
seed oil content	Aradu.FX2IC	Liu et al., 2020
seed oil content	Aradu.DF8LC	Liu et al., 2020
seed oil content	Aradu.JYA3W	Liu et al., 2020
seed oil content	Aradu.YHS2Y	Liu et al., 2020
seed oil content	Aradu.A7DR3	Liu et al., 2020
seed oil content	Aradu.P0ZYD	Liu et al., 2020
seed oil content	Aradu.CR73K	Liu et al., 2020
seed oil content	Aradu.S0A8H	Liu et al., 2020
seed oil content	Aradu.NM1FS	Liu et al., 2020
seed oil content	Aradu.2V34U	Liu et al., 2020
seed oil content	Aradu.IYZ29	Liu et al., 2020
seed oil content	Aradu.B1UPD	Liu et al., 2020
seed oil content	Aradu.IJ0H9	Liu et al., 2020
seed oil content	Aradu.L02C7	Liu et al., 2020
seed oil content	Aradu.F2M9G	Liu et al., 2020
seed oil content	Aradu.8Z92W	Liu et al., 2020
seed oil content	Aradu.KCC58	Liu et al., 2020
seed oil content	Aradu.GZZ2X	Liu et al., 2020
seed oil content	Aradu.I2A4P	Liu et al., 2020
seed oil content	Aradu.06C7F	Liu et al., 2020
seed oil content	Aradu.5HL6P	Liu et al., 2020
seed oil content	Aradu.X91JK	Liu et al., 2020
seed oil content	Aradu.VR2PL	Liu et al., 2020
seed oil content	Aradu.D6BJZ	Liu et al., 2020
seed oil content	Aradu.RN59F	Liu et al., 2020
seed oil content	Aradu.L8QZK	Liu et al., 2020
seed oil content	Aradu.5SD5G	Liu et al., 2020
seed oil content	Aradu.JCY76	Liu et al., 2020
seed oil content	Aradu.4W33C	Liu et al., 2020
seed oil content	Aradu.7175A	Liu et al., 2020
seed oil content	Aradu.A86G7	Liu et al., 2020
seed oil content	Aradu.ZFG9D	Liu et al., 2020
seed oil content	Aradu.P97BC	Liu et al., 2020
seed oil content	Aradu.B4AI9	Liu et al., 2020
seed oil content	Aradu.8U1PN	Liu et al., 2020
seed oil content	Aradu.03X4Q	Liu et al., 2020
seed oil content	Aradu.8G93R	Liu et al., 2020
seed oil content	Aradu.A5TXT	Liu et al., 2020
seed oil content	Aradu.97NYQ	Liu et al., 2020
seed oil content	Aradu.KY87Q	Liu et al., 2020
seed oil content	Aradu.R54DE	Liu et al., 2020
seed oil content	Aradu.5MM8H	Liu et al., 2020
seed oil content	Aradu.8V76K	Liu et al., 2020
seed oil content	Aradu.2I32N	Liu et al., 2020
seed oil content	Aradu.F0Y0D	Liu et al., 2020
seed oil content	Aradu.BU1C4	Liu et al., 2020
seed oil content	Aradu.1LK5M	Liu et al., 2020
seed oil content	Aradu.EW7VN	Liu et al., 2020
seed oil content	Aradu.U7A5U	Liu et al., 2020
seed oil content	Aradu.S1SNW	Liu et al., 2020
seed oil content	Aradu.ZU011	Liu et al., 2020
seed oil content	Aradu.42E7V	Liu et al., 2020
seed oil content	Aradu.IMH3N	Liu et al., 2020
seed oil content	Aradu.P9SPT	Liu et al., 2020
seed oil content	Aradu.63EET	Liu et al., 2020
seed oil content	Aradu.934TY	Liu et al., 2020
seed oil content	Aradu.QSH92	Liu et al., 2020
seed oil content	Aradu.VSA8A	Liu et al., 2020
seed oil content	Aradu.756NB	Liu et al., 2020
seed oil content	Aradu.52L7X	Liu et al., 2020
seed oil content	Aradu.ICY54	Liu et al., 2020
seed oil content	Aradu.81KD9	Liu et al., 2020
seed oil content	Aradu.K3KYD	Liu et al., 2020
seed oil content	Aradu.U84CT	Liu et al., 2020
seed oil content	Aradu.77GNE	Liu et al., 2020
seed oil content	Aradu.M8KJJ	Liu et al., 2020
seed oil content	Aradu.NZX3E	Liu et al., 2020
seed oil content	Aradu.FVV4I	Liu et al., 2020
seed oil content	Aradu.TU85X	Liu et al., 2020
seed oil content	Aradu.YC8RE	Liu et al., 2020
seed oil content	Aradu.G3EVT	Liu et al., 2020
seed oil content	Aradu.M9FCM	Liu et al., 2020
seed oil content	Aradu.E8VD0	Liu et al., 2020
seed oil content	Aradu.EG5ES	Liu et al., 2020
seed oil content	Aradu.I0PYY	Liu et al., 2020
seed oil content	Aradu.S7JJM	Liu et al., 2020
seed oil content	Aradu.HY69I	Liu et al., 2020
seed oil content	Aradu.HJI9Q	Liu et al., 2020
seed oil content	Aradu.BY3LD	Liu et al., 2020
seed oil content	Aradu.LFL4V	Liu et al., 2020
seed oil content	Aradu.CTJ5Z	Liu et al., 2020
seed oil content	Aradu.N57Z8	Liu et al., 2020
seed oil content	Aradu.TND5C	Liu et al., 2020
seed oil content	Aradu.QW43Y	Liu et al., 2020
seed oil content	Aradu.Y3XCY	Liu et al., 2020
seed oil content	Aradu.2Z73U	Liu et al., 2020
seed oil content	Aradu.XCN48	Liu et al., 2020
seed oil content	Aradu.C4MV9	Liu et al., 2020
seed oil content	Aradu.R5QMA	Liu et al., 2020
seed oil content	Aradu.T7V15	Liu et al., 2020
seed oil content	Aradu.0ZY8C	Liu et al., 2020
seed oil content	Aradu.M2NRW	Liu et al., 2020
seed oil content	Aradu.9VN8Q	Liu et al., 2020
seed oil content	Aradu.6E5C6	Liu et al., 2020
seed oil content	Aradu.YYR5S	Liu et al., 2020
seed oil content	Aradu.483IH	Liu et al., 2020
seed oil content	Aradu.NW834	Liu et al., 2020
seed oil content	Aradu.K7VBW	Liu et al., 2020
seed oil content	Aradu.9L9TA	Liu et al., 2020
seed oil content	Aradu.UK4BE	Liu et al., 2020
seed oil content	Aradu.P7UA8	Liu et al., 2020
seed oil content	Aradu.S8QFF	Liu et al., 2020
seed oil content	Aradu.IY1LP	Liu et al., 2020
seed oil content	Aradu.N2LUB	Liu et al., 2020
seed oil content	Aradu.Y7IE8	Liu et al., 2020
seed oil content	Aradu.15QSN	Liu et al., 2020
seed oil content	Aradu.VS58R	Liu et al., 2020
seed oil content	Aradu.5BK9D	Liu et al., 2020
seed oil content	Aradu.KY0UG	Liu et al., 2020
seed oil content	Aradu.KZ75F	Liu et al., 2020
seed oil content	Aradu.7SV97	Liu et al., 2020
seed oil content	Aradu.T7Z5L	Liu et al., 2020
seed oil content	Aradu.EVW0U	Liu et al., 2020
seed oil content	Aradu.G65BN	Liu et al., 2020
seed oil content	Aradu.6W9YP	Liu et al., 2020
seed oil content	Aradu.Q8U49	Liu et al., 2020
seed oil content	Aradu.R9QX8	Liu et al., 2020
seed oil content	Aradu.AZ422	Liu et al., 2020
seed oil content	Aradu.34VYW	Liu et al., 2020
seed oil content	Aradu.55FFX	Liu et al., 2020
seed oil content	Aradu.EWZ0P	Liu et al., 2020
seed oil content	Aradu.IV8ME	Liu et al., 2020
seed oil content	Aradu.NGG06	Liu et al., 2020
seed oil content	Aradu.TKT5W	Liu et al., 2020
seed oil content	Aradu.M5CVM	Liu et al., 2020
seed oil content	Aradu.F7Z4Y	Liu et al., 2020
seed oil content	Aradu.JV05Y	Liu et al., 2020
seed oil content	Aradu.U6GS5	Liu et al., 2020
seed oil content	Aradu.D8YGQ	Liu et al., 2020
seed oil content	Aradu.7P5YA	Liu et al., 2020
seed oil content	Aradu.WB5Q0	Liu et al., 2020
seed oil content	Aradu.U97E0	Liu et al., 2020
seed oil content	Aradu.50FPJ	Liu et al., 2020
seed oil content	Aradu.GJ34Y	Liu et al., 2020
seed oil content	Aradu.E1VV0	Liu et al., 2020
seed oil content	Aradu.0BL9G	Liu et al., 2020
seed oil content	Aradu.H642L	Liu et al., 2020
seed oil content	Aradu.VX30A	Liu et al., 2020
seed oil content	Aradu.GP33T	Liu et al., 2020
seed oil content	Aradu.4W3J6	Liu et al., 2020
seed oil content	Aradu.V912X	Liu et al., 2020
seed oil content	Aradu.ZHA2L	Liu et al., 2020
seed oil content	Aradu.XE8IM	Liu et al., 2020
seed oil content	Aradu.E9CGG	Liu et al., 2020
seed oil content	Aradu.SWX32	Liu et al., 2020
seed oil content	Aradu.4LF25	Liu et al., 2020
seed oil content	Aradu.96H72	Liu et al., 2020
seed oil content	Aradu.X6KFI	Liu et al., 2020
seed oil content	Aradu.BK2WA	Liu et al., 2020
seed oil content	Aradu.X7LLL	Liu et al., 2020
seed oil content	Aradu.W1AF4	Liu et al., 2020
seed oil content	Aradu.TB2PX	Liu et al., 2020
seed oil content	Aradu.ZSQ2M	Liu et al., 2020
seed oil content	Aradu.207FM	Liu et al., 2020
seed oil content	Aradu.8ML5D	Liu et al., 2020
seed oil content	Aradu.T52CY	Liu et al., 2020
seed oil content	Aradu.P9Z3S	Liu et al., 2020
seed oil content	Aradu.WP91H	Liu et al., 2020
seed oil content	Aradu.PJ32C	Liu et al., 2020
seed oil content	Aradu.W3KTW	Liu et al., 2020
seed oil content	Aradu.XN89H	Liu et al., 2020
seed oil content	Aradu.3JM3M	Liu et al., 2020
seed oil content	Aradu.TNP6E	Liu et al., 2020
seed oil content	Aradu.YVW15	Liu et al., 2020
seed oil content	Aradu.E3SP0	Liu et al., 2020
seed oil content	Aradu.TLD4K	Liu et al., 2020
seed oil content	Aradu.SPS87	Liu et al., 2020
seed oil content	Aradu.ZV9WQ	Liu et al., 2020
seed oil content	Aradu.V9VCU	Liu et al., 2020
seed oil content	Aradu.TL04A	Liu et al., 2020
seed oil content	Aradu.Z6PX5	Liu et al., 2020
seed oil content	Aradu.PJ07U	Liu et al., 2020
seed oil content	Aradu.89A2H	Liu et al., 2020
seed oil content	Aradu.47HWK	Liu et al., 2020
seed oil content	Aradu.7R7P7	Liu et al., 2020
seed oil content	Aradu.TSW1P	Liu et al., 2020
seed oil content	Aradu.QR8IL	Liu et al., 2020
seed oil content	Aradu.11B8F	Liu et al., 2020
seed oil content	Aradu.7VI9W	Liu et al., 2020
seed oil content	Aradu.L0BQ6	Liu et al., 2020
seed oil content	Aradu.5U8HG	Liu et al., 2020
seed oil content	Aradu.M1TDE	Liu et al., 2020
seed oil content	Aradu.SW45G	Liu et al., 2020
seed oil content	Aradu.1F1XW	Liu et al., 2020
seed oil content	Aradu.NCP7U	Liu et al., 2020
seed oil content	Aradu.810UH	Liu et al., 2020
seed oil content	Aradu.T8IMJ	Liu et al., 2020
seed oil content	Aradu.H8JMX	Liu et al., 2020
seed oil content	Aradu.GAZ1G	Liu et al., 2020
seed oil content	Aradu.J5JED	Liu et al., 2020
seed oil content	Aradu.8MY8E	Liu et al., 2020
seed oil content	Aradu.1DA21	Liu et al., 2020
seed oil content	Aradu.Z5YB0	Liu et al., 2020
seed oil content	Aradu.BS6FB	Liu et al., 2020
seed oil content	Aradu.JAZ9L	Liu et al., 2020
seed oil content	Aradu.L1NUT	Liu et al., 2020
seed oil content	Aradu.08GEE	Liu et al., 2020
seed oil content	Aradu.GI8KH	Liu et al., 2020
seed oil content	Aradu.012LD	Liu et al., 2020
seed oil content	Aradu.068N6	Liu et al., 2020
seed oil content	Aradu.0CQ2X	Liu et al., 2020
seed oil content	Aradu.18237	Liu et al., 2020
seed oil content	Aradu.1B3IN	Liu et al., 2020
seed oil content	Aradu.1F2UP	Liu et al., 2020
seed oil content	Aradu.22F8R	Liu et al., 2020
seed oil content	Aradu.23XWK	Liu et al., 2020
seed oil content	Aradu.3EL3I	Liu et al., 2020
seed oil content	Aradu.3L1J2	Liu et al., 2020
seed oil content	Aradu.4J11T	Liu et al., 2020
seed oil content	Aradu.50UTF	Liu et al., 2020
seed oil content	Aradu.64XUQ	Liu et al., 2020
seed oil content	Aradu.67PUF	Liu et al., 2020
seed oil content	Aradu.82VY6	Liu et al., 2020
seed oil content	Aradu.B46IG	Liu et al., 2020
seed oil content	Aradu.BX3KE	Liu et al., 2020
seed oil content	Aradu.D7VM0	Liu et al., 2020
seed oil content	Aradu.DSP6Q	Liu et al., 2020
seed oil content	Aradu.E58SH	Liu et al., 2020
seed oil content	Aradu.EFD6S	Liu et al., 2020
seed oil content	Aradu.F5MYE	Liu et al., 2020
seed oil content	Aradu.FRP5A	Liu et al., 2020
seed oil content	Aradu.FSK1B	Liu et al., 2020
seed oil content	Aradu.G32CD	Liu et al., 2020
seed oil content	Aradu.GM5S2	Liu et al., 2020
seed oil content	Aradu.H21KL	Liu et al., 2020
seed oil content	Aradu.H7DQX	Liu et al., 2020
seed oil content	Aradu.HTT6Y	Liu et al., 2020
seed oil content	Aradu.I5YUI	Liu et al., 2020
seed oil content	Aradu.J2SZY	Liu et al., 2020
seed oil content	Aradu.J3REE	Liu et al., 2020
seed oil content	Aradu.JNA0U	Liu et al., 2020
seed oil content	Aradu.M369H	Liu et al., 2020
seed oil content	Aradu.MT94D	Liu et al., 2020
seed oil content	Aradu.N8MUP	Liu et al., 2020
seed oil content	Aradu.P3EPK	Liu et al., 2020
seed oil content	Aradu.QU3LC	Liu et al., 2020
seed oil content	Aradu.S0YHI	Liu et al., 2020
seed oil content	Aradu.S16C5	Liu et al., 2020
seed oil content	Aradu.VG3TY	Liu et al., 2020
seed oil content	Aradu.VWM5Q	Liu et al., 2020
seed oil content	Aradu.VZ1DU	Liu et al., 2020
seed oil content	Aradu.WF9M3	Liu et al., 2020
seed oil content	Aradu.X4X5G	Liu et al., 2020
seed oil content	Aradu.XAF73	Liu et al., 2020
seed oil content	Aradu.XD7VB	Liu et al., 2020
seed oil content	Aradu.ZC86K	Liu et al., 2020
seed oil content	Aradu.ZRL0U	Liu et al., 2020
seed oil content	Aradu.4XL1L	Liu et al., 2020
seed oil content	Aradu.D1CF5	Liu et al., 2020
seed oil content	Aradu.MSJ8D	Liu et al., 2020
seed oil content	Aradu.A4NIY	Liu et al., 2020
seed oil content	Aradu.M3CK1	Liu et al., 2020
seed oil content	Aradu.S4S1K	Liu et al., 2020
seed oil content	Aradu.Z54PV	Liu et al., 2020
seed oil content	Aradu.02ZGN	Liu et al., 2020
seed oil content	Aradu.YJ8HP	Liu et al., 2020
seed oil content	Aradu.00U6W	Liu et al., 2020
seed oil content	Aradu.U2C77	Liu et al., 2020
seed oil content	Aradu.IC00B	Liu et al., 2020
seed oil content	Araip.VXX40	Liu et al., 2020
seed oil content	Araip.1309E	Liu et al., 2020
seed oil content	Araip.MAL00	Liu et al., 2020
seed oil content	Araip.SGQ01	Liu et al., 2020
seed oil content	Araip.S81WY	Liu et al., 2020
seed oil content	Araip.XMV4P	Liu et al., 2020
seed oil content	Araip.E2AVB	Liu et al., 2020
seed oil content	Araip.IQ2QT	Liu et al., 2020
seed oil content	Araip.9DU11	Liu et al., 2020
seed oil content	Araip.7P4Z5	Liu et al., 2020
seed oil content	Araip.5V5V3	Liu et al., 2020
seed oil content	Araip.ZW0QJ	Liu et al., 2020
seed oil content	Araip.W6PAP	Liu et al., 2020
seed oil content	Araip.MKS2J	Liu et al., 2020
seed oil content	Araip.3NG20	Liu et al., 2020
seed oil content	Araip.KLW73	Liu et al., 2020
seed oil content	Araip.WKT96	Liu et al., 2020
seed oil content	Araip.ZY86Z	Liu et al., 2020
seed oil content	Araip.SL0IV	Liu et al., 2020
seed oil content	Araip.IBY8N	Liu et al., 2020
seed oil content	Araip.Q3CU1	Liu et al., 2020
seed oil content	Araip.GZK3F	Liu et al., 2020
seed oil content	Araip.L9GIV	Liu et al., 2020
seed oil content	Araip.QGN56	Liu et al., 2020
seed oil content	Araip.C6UMI	Liu et al., 2020
seed oil content	Araip.E5ASS	Liu et al., 2020
seed oil content	Araip.P1QB6	Liu et al., 2020
seed oil content	Araip.5M5DL	Liu et al., 2020
seed oil content	Araip.AR8NT	Liu et al., 2020
seed oil content	Araip.YCY7E	Liu et al., 2020
seed oil content	Araip.8VB8P	Liu et al., 2020
seed oil content	Araip.BVV1N	Liu et al., 2020
seed oil content	Araip.VHL8X	Liu et al., 2020
seed oil content	Araip.P4XMZ	Liu et al., 2020
seed oil content	Araip.F70E1	Liu et al., 2020
seed oil content	Araip.MHY8N	Liu et al., 2020
seed oil content	Araip.I2AAU	Liu et al., 2020
seed oil content	Araip.1P21P	Liu et al., 2020
seed oil content	Araip.Z9A08	Liu et al., 2020
seed oil content	Araip.FGY3Y	Liu et al., 2020
seed oil content	Araip.3Z6US	Liu et al., 2020
seed oil content	Araip.90YM8	Liu et al., 2020
seed oil content	Araip.30W4M	Liu et al., 2020
seed oil content	Araip.548KF	Liu et al., 2020
seed oil content	Araip.I56T6	Liu et al., 2020
seed oil content	Araip.J441G	Liu et al., 2020
seed oil content	Araip.UIE4G	Liu et al., 2020
seed oil content	Araip.CJ6VL	Liu et al., 2020
seed oil content	Araip.K9IZP	Liu et al., 2020
seed oil content	Araip.12YZL	Liu et al., 2020
seed oil content	Araip.17JI3	Liu et al., 2020
seed oil content	Araip.W3HL3	Liu et al., 2020
seed oil content	Araip.M68GH	Liu et al., 2020
seed oil content	Araip.1C4CW	Liu et al., 2020
seed oil content	Araip.N872L	Liu et al., 2020
seed oil content	Araip.XY5R4	Liu et al., 2020
seed oil content	Araip.02WLY	Liu et al., 2020
seed oil content	Araip.2714I	Liu et al., 2020
seed oil content	Araip.RXK1S	Liu et al., 2020
seed oil content	Araip.UT3QL	Liu et al., 2020
seed oil content	Araip.ZA012	Liu et al., 2020
seed oil content	Araip.WZH2S	Liu et al., 2020
seed oil content	Araip.D77W5	Liu et al., 2020
seed oil content	Araip.A242D	Liu et al., 2020
seed oil content	Araip.NL2P7	Liu et al., 2020
seed oil content	Araip.1ZJ86	Liu et al., 2020
seed oil content	Araip.F5941	Liu et al., 2020
seed oil content	Araip.1Z65W	Liu et al., 2020
seed oil content	Araip.MD5X3	Liu et al., 2020
seed oil content	Araip.IA3XR	Liu et al., 2020
seed oil content	Araip.321WW	Liu et al., 2020
seed oil content	Araip.Z944X	Liu et al., 2020
seed oil content	Araip.S8MSL	Liu et al., 2020
seed oil content	Araip.57LQ6	Liu et al., 2020
seed oil content	Araip.GPD9Z	Liu et al., 2020
seed oil content	Araip.2487W	Liu et al., 2020
seed oil content	Araip.4R6MD	Liu et al., 2020
seed oil content	Araip.T2Z8Y	Liu et al., 2020
seed oil content	Araip.LY559	Liu et al., 2020
seed oil content	Araip.776WX	Liu et al., 2020
seed oil content	Araip.2974Q	Liu et al., 2020
seed oil content	Araip.ZL90G	Liu et al., 2020
seed oil content	Araip.4RS49	Liu et al., 2020
seed oil content	Araip.0Z0A6	Liu et al., 2020
seed oil content	Araip.56ELE	Liu et al., 2020
seed oil content	Araip.J7S76	Liu et al., 2020
seed oil content	Araip.XX8XH	Liu et al., 2020
seed oil content	Araip.SH80B	Liu et al., 2020
seed oil content	Araip.MP5EW	Liu et al., 2020
seed oil content	Araip.LE8QH	Liu et al., 2020
seed oil content	Araip.J078C	Liu et al., 2020
seed oil content	Araip.IM1EJ	Liu et al., 2020
seed oil content	Araip.I5D0R	Liu et al., 2020
seed oil content	Araip.QQ0K4	Liu et al., 2020
seed oil content	Araip.MGW36	Liu et al., 2020
seed oil content	Araip.0KF0L	Liu et al., 2020
seed oil content	Araip.6UE4Z	Liu et al., 2020
seed oil content	Araip.RE496	Liu et al., 2020
seed oil content	Araip.RV2ZZ	Liu et al., 2020
seed oil content	Araip.AK5TZ	Liu et al., 2020
seed oil content	Araip.3XJ9M	Liu et al., 2020
seed oil content	Araip.Y0BV6	Liu et al., 2020
seed oil content	Araip.Y6U3P	Liu et al., 2020
seed oil content	Araip.C6Z2E	Liu et al., 2020
seed oil content	Araip.T0DQ5	Liu et al., 2020
seed oil content	Araip.207I2	Liu et al., 2020
seed oil content	Araip.F05RN	Liu et al., 2020
seed oil content	Araip.22URS	Liu et al., 2020
seed oil content	Araip.FZ21Q	Liu et al., 2020
seed oil content	Araip.C9EBF	Liu et al., 2020
seed oil content	Araip.BET6I	Liu et al., 2020
seed oil content	Araip.B5WS3	Liu et al., 2020
seed oil content	Araip.2XK29	Liu et al., 2020
seed oil content	Araip.RYF10	Liu et al., 2020
seed oil content	Araip.XFW1X	Liu et al., 2020
seed oil content	Araip.83G0C	Liu et al., 2020
seed oil content	Araip.Q6WTW	Liu et al., 2020
seed oil content	Araip.IUG52	Liu et al., 2020
seed oil content	Araip.P86YJ	Liu et al., 2020
seed oil content	Araip.1AG7I	Liu et al., 2020
seed oil content	Araip.XZG3N	Liu et al., 2020
seed oil content	Araip.20XDZ	Liu et al., 2020
seed oil content	Araip.H8E01	Liu et al., 2020
seed oil content	Araip.F2EWZ	Liu et al., 2020
seed oil content	Araip.0F3YM	Liu et al., 2020
seed oil content	Araip.B5NQV	Liu et al., 2020
seed oil content	Araip.19RI9	Liu et al., 2020
seed oil content	Araip.G73QT	Liu et al., 2020
seed oil content	Araip.BJZ5H	Liu et al., 2020
seed oil content	Araip.W2YGT	Liu et al., 2020
seed oil content	Araip.4W8TG	Liu et al., 2020
seed oil content	Araip.DMW0Y	Liu et al., 2020
seed oil content	Araip.VJN1S	Liu et al., 2020
seed oil content	Araip.E4S3A	Liu et al., 2020
seed oil content	Araip.QLN2V	Liu et al., 2020
seed oil content	Araip.FN4N4	Liu et al., 2020
seed oil content	Araip.N3W37	Liu et al., 2020
seed oil content	Araip.IVP6L	Liu et al., 2020
seed oil content	Araip.FX4SX	Liu et al., 2020
seed oil content	Araip.NY5B8	Liu et al., 2020
seed oil content	Araip.UEU20	Liu et al., 2020
seed oil content	Araip.54UY1	Liu et al., 2020
seed oil content	Araip.U2EMB	Liu et al., 2020
seed oil content	Araip.BIY7X	Liu et al., 2020
seed oil content	Araip.UDU9G	Liu et al., 2020
seed oil content	Araip.DM2H4	Liu et al., 2020
seed oil content	Araip.T50EC	Liu et al., 2020
seed oil content	Araip.A8LAL	Liu et al., 2020
seed oil content	Araip.Y103W	Liu et al., 2020
seed oil content	Araip.KSH70	Liu et al., 2020
seed oil content	Araip.9T8RI	Liu et al., 2020
seed oil content	Araip.Z4384	Liu et al., 2020
seed oil content	Araip.7478P	Liu et al., 2020
seed oil content	Araip.4C7BD	Liu et al., 2020
seed oil content	Araip.2L964	Liu et al., 2020
seed oil content	Araip.67R8V	Liu et al., 2020
seed oil content	Araip.S2YFU	Liu et al., 2020
seed oil content	Araip.95Q23	Liu et al., 2020
seed oil content	Araip.FL8FH	Liu et al., 2020
seed oil content	Araip.Y0C4V	Liu et al., 2020
seed oil content	Araip.I6YVE	Liu et al., 2020
seed oil content	Araip.1CY01	Liu et al., 2020
seed oil content	Araip.HME3E	Liu et al., 2020
seed oil content	Araip.182XT	Liu et al., 2020
seed oil content	Araip.RC4R7	Liu et al., 2020
seed oil content	Araip.QX3BP	Liu et al., 2020
seed oil content	Araip.M7N2G	Liu et al., 2020
seed oil content	Araip.3Q02H	Liu et al., 2020
seed oil content	Araip.ZR973	Liu et al., 2020
seed oil content	Araip.9K3A2	Liu et al., 2020
seed oil content	Araip.Y7ZMT	Liu et al., 2020
seed oil content	Araip.VS5WR	Liu et al., 2020
seed oil content	Araip.87ZS2	Liu et al., 2020
seed oil content	Araip.TS8P6	Liu et al., 2020
seed oil content	Araip.1409G	Liu et al., 2020
seed oil content	Araip.NYT7M	Liu et al., 2020
seed oil content	Araip.U2282	Liu et al., 2020
seed oil content	Araip.IQ8UV	Liu et al., 2020
seed oil content	Araip.8PN72	Liu et al., 2020
seed oil content	Araip.DU0UV	Liu et al., 2020
seed oil content	Araip.WL3RD	Liu et al., 2020
seed oil content	Araip.BQN0K	Liu et al., 2020
seed oil content	Araip.C67VJ	Liu et al., 2020
seed oil content	Araip.JW3M4	Liu et al., 2020
seed oil content	Araip.6682F	Liu et al., 2020
seed oil content	Araip.U7F06	Liu et al., 2020
seed oil content	Araip.C7G4E	Liu et al., 2020
seed oil content	Araip.1A9I8	Liu et al., 2020
seed oil content	Araip.1F2F6	Liu et al., 2020
seed oil content	Araip.02677	Liu et al., 2020
seed oil content	Araip.79HSV	Liu et al., 2020
seed oil content	Araip.8CP42	Liu et al., 2020
seed oil content	Araip.SI8I8	Liu et al., 2020
seed oil content	Araip.ALM9L	Liu et al., 2020
seed oil content	Araip.T9RSC	Liu et al., 2020
seed oil content	Araip.G2YF5	Liu et al., 2020
seed oil content	Araip.M09H5	Liu et al., 2020
seed oil content	Araip.P4XV6	Liu et al., 2020
seed oil content	Araip.39BPZ	Liu et al., 2020

## Sheet: SNP_QTL
Trait	Chromosome	SNP or QTL Position	Reference
seed size/weight	Aradu.A02	32398764	Zhang et al., 2017
seed size/weight	Aradu.A02	86439145	Zhou et al., 2021
seed size/weight	Aradu.A03	6992035	Zhang et al., 2017
seed size/weight	Aradu.A03	73212601	Zhang et al., 2017
seed size/weight	Aradu.A03	102775128	Zhang et al., 2017
seed size/weight	Aradu.A03	121804114	Zhang et al., 2017
seed size/weight	Aradu.A05	24341982	Zhang et al., 2017
seed size/weight	Aradu.A05	32373760	Zhang et al., 2017
seed size/weight	Aradu.A05	32899449	Zhang et al., 2017
seed size/weight	Aradu.A06	108577126	Zhou et al., 2021
seed size/weight	Aradu.A06	108613799	Zhou et al., 2021
seed size/weight	Aradu.A06	108797911	Zhou et al., 2021
seed size/weight	Aradu.A08	12902738	Zhang et al., 2017
seed size/weight	Aradu.A10	77873602	Zhang et al., 2017
seed size/weight	Aradu.A10	101450691	Zhang et al., 2017
seed size/weight	Arahy.02	93669989	Wang et al., 2019
seed size/weight	Arahy.02	93835355	Wang et al., 2019
seed size/weight	Arahy.02	95707207	Wang et al., 2019
seed size/weight	Arahy.07	15932212	Wang et al., 2019
seed size/weight	Arahy.10	67824502	Wang et al., 2019
seed size/weight	Arahy.11	39314586	Wang et al., 2019
seed size/weight	Arahy.11	39314617	Wang et al., 2019
seed size/weight	Arahy.11	140130284	Wang et al., 2019
seed size/weight	Arahy.15	134547521	Wang et al., 2019
seed size/weight	Arahy.16	26887159	Wang et al., 2019
seed size/weight	Arahy.16	26954799	Wang et al., 2019
seed size/weight	Arahy.16	28850443	Wang et al., 2019
seed size/weight	Arahy.16	29101669	Wang et al., 2019
seed size/weight	Arahy.16	32888295	Wang et al., 2019
seed size/weight	Arahy.16	57758544	Wang et al., 2019
seed size/weight	Arahy.16	64142201	Wang et al., 2019
seed size/weight	Arahy.16	69500958	Wang et al., 2019
seed size/weight	Arahy.16	86525427	Wang et al., 2019
seed size/weight	Arahy.16	94404904	Wang et al., 2019
seed size/weight	Arahy.16	120652665	Wang et al., 2019
seed size/weight	Arahy.16	133839995	Wang et al., 2019
seed size/weight	Arahy.17	7257138	Wang et al., 2019
seed size/weight	Arahy.18	57565927	Wang et al., 2019
seed size/weight	Arahy.18	73916621	Wang et al., 2019
seed size/weight	Arahy.18	82489241	Wang et al., 2019
seed size/weight	Arahy.18	86668853	Wang et al., 2019
seed size/weight	Arahy.18	93753275	Wang et al., 2019
seed size/weight	Arahy.19	30572885	Wang et al., 2019
seed size/weight	Arahy.19	39385428	Wang et al., 2019
seed size/weight	Arahy.19	40793284	Wang et al., 2019
seed size/weight	Arahy.19	46874456	Wang et al., 2019
seed size/weight	Arahy.19	47630379	Wang et al., 2019
seed size/weight	Arahy.19	53236410	Wang et al., 2019
seed size/weight	Arahy.19	57442106	Wang et al., 2019
seed size/weight	Arahy.19	61414701	Wang et al., 2019
seed size/weight	Arahy.19	61414714	Wang et al., 2019
seed size/weight	Arahy.19	61414744	Wang et al., 2019
seed size/weight	Arahy.19	71104696	Wang et al., 2019
seed size/weight	Arahy.19	71348837	Wang et al., 2019
seed size/weight	Arahy.19	74483129	Wang et al., 2019
seed size/weight	Arahy.19	74483251	Wang et al., 2019
seed size/weight	Arahy.19	74500057	Wang et al., 2019
seed size/weight	Arahy.19	78543962	Wang et al., 2019
seed size/weight	Arahy.19	83362979	Wang et al., 2019
seed size/weight	Arahy.19	88287192	Wang et al., 2019
seed size/weight	Arahy.19	108653875	Wang et al., 2019
seed size/weight	Arahy.19	110390656	Wang et al., 2019
seed size/weight	Arahy.19	135048961	Wang et al., 2019
seed size/weight	Arahy.19	139288909	Wang et al., 2019
seed size/weight	Arahy.19	143095276	Wang et al., 2019
seed size/weight	Arahy.19	144302000	Wang et al., 2019
seed size/weight	Arahy.19	144553194	Wang et al., 2019
seed size/weight	Arahy.19	145999514	Wang et al., 2019
seed size/weight	Araip.B01	125205859	Zhang et al., 2017
seed size/weight	Araip.B01	126123429	Zhang et al., 2017
seed size/weight	Araip.B03	30245701	Zhang et al., 2017
seed size/weight	Araip.B03	33322951	Zhang et al., 2017
seed size/weight	Araip.B03	36966529	Zhang et al., 2017
seed size/weight	Araip.B03	37048415	Zhang et al., 2017
seed size/weight	Araip.B03	37682314	Zhang et al., 2017
seed size/weight	Araip.B03	43150535	Zhang et al., 2017
seed size/weight	Araip.B03	43468927	Zhang et al., 2017
seed size/weight	Araip.B04	14788349	Zhou et al., 2021
seed size/weight	Araip.B05	26230476	Zhang et al., 2017
seed size/weight	Araip.B05	28941971	Zhou et al., 2021
seed size/weight	Araip.B06	127760084	Zhou et al., 2021
seed size/weight	Araip.B06	128026082	Zhou et al., 2021
seed size/weight	Araip.B06	128423460	Zhou et al., 2021
seed size/weight	Araip.B06	129049126	Zhou et al., 2021
seed size/weight	Araip.B06	129334953	Zhou et al., 2021
seed size/weight	Araip.B06	129337040	Zhou et al., 2021
seed size/weight	Araip.B08	56505037	Zhang et al., 2017
seed size/weight	Araip.B08	84833185	Zhang et al., 2017
seed size/weight	Araip.B08	89563542	Zhang et al., 2017
seed size/weight	Araip.B08	90916052	Zhang et al., 2017
seed size/weight	Araip.B08	95563809	Zhang et al., 2017
seed size/weight	Araip.B08	12828497	Zhou et al., 2021
seed size/weight	Aradu.A05	98000000-106000000	Wang et al., 2022
seed size/weight	Aradu.A05	100670000-102520000	Wang et al., 2022
seed size/weight	Aradu.A05	105050000-106660000	Wang et al., 2022
seed size/weight	Aradu.A06	104000000-107000000	Wang et al., 2022
seed size/weight	Aradu.A07	1000000-6000000	Wang et al., 2022
seed size/weight	Arahy.02	92750000-99810000	Zhang et al., 2019
seed size/weight	Arahy.16	8840000-11610000	Zhang et al., 2020
seed size/weight	Arahy.17	123800000-124900000	Wang et al., 2018b
seed size/weight	Arahy.17	1980000-4650000	Mondal et al., 2019
seed oil content	Aradu.A01	34495950	Wang et al., 2018a
seed oil content	Aradu.A01	87356428	Wang et al., 2018a
seed oil content	Aradu.A01	90271821	Wang et al., 2018a
seed oil content	Aradu.A01	95486898	Wang et al., 2018a
seed oil content	Aradu.A02	78425052	Wang et al., 2018a
seed oil content	Aradu.A03	491125	Wang et al., 2018a
seed oil content	Aradu.A03	8819086	Wang et al., 2018a
seed oil content	Aradu.A03	25151910	Wang et al., 2018a
seed oil content	Aradu.A04	296696	Wang et al., 2018a
seed oil content	Aradu.A04	60457589	Wang et al., 2018a
seed oil content	Aradu.A05	2137027	Wang et al., 2018a
seed oil content	Aradu.A05	23669946	Wang et al., 2018a
seed oil content	Aradu.A06	14054256	Wang et al., 2018a
seed oil content	Aradu.A06	19788220	Wang et al., 2018a
seed oil content	Aradu.A06	88260062	Wang et al., 2018a
seed oil content	Aradu.A07	41424269	Wang et al., 2018a
seed oil content	Aradu.A07	61207224	Wang et al., 2018a
seed oil content	Aradu.A08	30838257	Wang et al., 2018a
seed oil content	Aradu.A08	42061010	Wang et al., 2018a
seed oil content	Aradu.A09	2035680	Wang et al., 2018a
seed oil content	Aradu.A09	9583583	Wang et al., 2018a
seed oil content	Aradu.A09	53956083	Wang et al., 2018a
seed oil content	Aradu.A09	104813695	Wang et al., 2018a
seed oil content	Araip.B01	130615990	Wang et al., 2018a
seed oil content	Araip.B01	134729157	Wang et al., 2018a
seed oil content	Araip.B02	98604074	Wang et al., 2018a
seed oil content	Araip.B03	2753408	Wang et al., 2018a
seed oil content	Araip.B04	21814602	Wang et al., 2018a
seed oil content	Araip.B04	125079948	Wang et al., 2018a
seed oil content	Araip.B04	127849985	Wang et al., 2018a
seed oil content	Araip.B05	2828011	Wang et al., 2018a
seed oil content	Araip.B05	3795502	Wang et al., 2018a
seed oil content	Araip.B05	126779808	Wang et al., 2018a
seed oil content	Araip.B05	146196585	Wang et al., 2018a
seed oil content	Araip.B06	71556073	Wang et al., 2018a
seed oil content	Araip.B07	98647041	Wang et al., 2018a
seed oil content	Araip.B07	105525017	Wang et al., 2018a
seed oil content	Araip.B08	33400604	Wang et al., 2018a
seed oil content	Araip.B08	87754293	Wang et al., 2018a
seed oil content	Araip.B10	94138008	Wang et al., 2018a
